# Supplementary material
Source: HighWire-hosted journal article supplement (doi:10.1101/gr.281289.125)
Supplement: Supplemental_Data.xlsx [file Supplemental_Data.xlsx]

## Sheet: k-mer matrix
Supplemental Data:Ruminant TE k-mer count matrix
Id	Fam	SubF	Seq	AfricanBuffalo	Argali	BarbarySheep	BlackMuntjac	BlueSheep	BlueWildebeest	Cattle	ChineseMuntjac	ChineseWaterDeer	CommonDuiker	DefassaWaterbuck	ForestMuskDeer	Gemsbok	Gerenuk	Giraffe	Goat	GrantGazelle	GreaterKudu	HarveyDuiker	Ibex	Impala	KirksDikdik	Milu	Okapi	Pronghorn	Sheep	Suni	ThomsonGazelle	TibetanAntelope	WaterBuffalo	WhiteTailedDeer	Yak
ID1	DNA/hAT-Charlie	Charlie1a	ACATTTGCTTTGATGTATAACAGCAGTAATGGAGACTATGGT	0	0	0	0	1	0	0	0	0	0	1	0	1	5	0	0	2	4	0	7	0	0	0	0	0	0	1	1	0	4	0	5
ID2	DNA/hAT-Charlie	Charlie1a	AGGGATCTCATGAAAGGGTCTCAGTGACATCAAGGGTTCCAC	2	1	3	1	3	1	1	1	0	5	3	0	0	3	0	2	3	0	5	0	3	1	4	6	2	1	0	2	0	2	1	3
ID3	DNA/hAT-Charlie	Charlie1a	AGTCTCCATTACTGCTGTTATACATCAAAGCAAATGTCAACA	1	0	0	0	1	0	2	0	0	0	2	0	1	5	0	0	2	4	0	7	0	0	0	0	0	0	0	1	0	4	0	5
ID4	DNA/hAT-Charlie	Charlie1a	ATAGTCTCCATTACTGCTGTTATACATCAAAGCAAATGTCAA	1	0	0	0	1	0	0	0	0	0	1	0	1	5	0	0	2	4	0	7	0	0	0	0	0	0	0	1	0	3	0	5
ID5	DNA/hAT-Charlie	Charlie1a	ATCTCATGAAAGGGTCTCAGTGACATCAAGGGTTCCACAGAC	3	1	3	2	3	1	1	2	0	5	3	0	0	2	0	2	3	0	0	0	3	2	3	5	2	1	1	3	0	2	0	5
ID6	DNA/hAT-Charlie	Charlie1a	CAGGGATCTCATGAAAGGGTCTCAGTGACATCAAGGGTTCCA	0	1	3	1	3	1	1	1	0	5	3	0	0	3	0	2	3	0	5	0	3	1	4	6	2	1	0	2	0	2	1	3
ID7	DNA/hAT-Charlie	Charlie1a	CATAGTCTCCATTACTGCTGTTATACATCAAAGCAAATGTCA	1	0	0	0	1	0	0	0	0	0	1	0	1	5	0	0	2	4	0	7	0	0	0	0	0	0	0	1	0	4	0	5
ID8	DNA/hAT-Charlie	Charlie1a	CATGAAAGGGTCTCAGTGACATCAAGGGTTCCACAGACCACA	3	1	3	2	3	1	1	2	0	5	3	0	0	2	0	2	2	0	0	0	3	2	3	5	2	1	1	3	0	2	0	5
ID9	DNA/hAT-Charlie	Charlie1a	CATTTGCTTTGATGTATAACAGCAGTAATGGAGACTATGGTA	2	0	0	0	1	0	0	0	0	0	1	0	1	5	0	0	2	4	0	7	0	0	0	0	0	0	1	1	0	4	0	5
ID10	DNA/hAT-Charlie	Charlie1a	CCATAGTCTCCATTACTGCTGTTATACATCAAAGCAAATGTC	1	0	0	0	1	0	0	0	0	0	1	0	1	5	0	0	2	4	0	7	0	0	0	0	0	0	0	1	0	4	0	5
ID11	DNA/hAT-Charlie	Charlie1a	CTCAGGGATCTCATGAAAGGGTCTCAGTGACATCAAGGGTTC	2	1	3	1	3	1	1	1	0	5	3	0	0	3	0	2	3	0	5	0	3	1	2	6	2	1	0	2	0	2	1	3
ID12	DNA/hAT-Charlie	Charlie1a	CTCATGAAAGGGTCTCAGTGACATCAAGGGTTCCACAGACCA	3	1	3	2	3	1	1	2	0	5	3	0	0	2	0	2	2	0	0	0	3	2	3	5	2	1	1	3	0	2	0	5
ID13	DNA/hAT-Charlie	Charlie1a	CTGTGGAACCCTTGATGTCACTGAGACCCTTTCATGAGATCC	0	1	3	2	3	1	1	2	0	5	3	0	0	3	0	2	3	0	0	0	3	2	4	5	2	1	1	3	0	2	1	5
ID14	DNA/hAT-Charlie	Charlie1a	CTTGATGTCACTGAGACCCTTTCATGAGATCCCTGAGGTGAA	2	0	3	2	4	1	1	3	0	4	3	0	1	3	0	3	3	0	5	7	2	1	2	5	2	1	0	1	0	2	2	2
ID15	DNA/hAT-Charlie	Charlie1a	GATCTCATGAAAGGGTCTCAGTGACATCAAGGGTTCCACAGA	0	1	3	2	3	1	1	2	0	5	3	0	0	3	0	2	3	0	0	0	3	2	3	5	2	1	1	3	0	2	0	5
ID16	DNA/hAT-Charlie	Charlie1a	GCTACCATAGTCTCCATTACTGCTGTTATACATCAAAGCAAA	2	0	0	0	1	0	0	0	0	0	1	0	1	5	0	0	2	4	0	7	0	0	0	0	0	0	1	1	0	4	0	5
ID17	DNA/hAT-Charlie	Charlie1a	GGAACCCTTGATGTCACTGAGACCCTTTCATGAGATCCCTGA	2	1	3	1	3	1	1	1	0	5	3	0	0	3	0	2	3	0	5	0	3	1	4	6	2	1	0	2	0	2	1	3
ID18	DNA/hAT-Charlie	Charlie1a	GGGATCTCATGAAAGGGTCTCAGTGACATCAAGGGTTCCACA	3	1	3	2	3	1	1	2	0	5	3	0	0	3	0	2	3	0	4	0	3	2	4	5	2	1	0	2	0	2	1	5
ID19	DNA/hAT-Charlie	Charlie1a	GGTCTGTGGAACCCTTGATGTCACTGAGACCCTTTCATGAGA	3	1	3	2	3	1	1	2	0	5	3	0	0	2	0	2	2	0	0	0	3	2	3	5	2	1	1	3	0	2	0	5
ID20	DNA/hAT-Charlie	Charlie1a	GTGGTCTGTGGAACCCTTGATGTCACTGAGACCCTTTCATGA	3	1	3	2	3	1	1	2	0	5	3	0	0	0	0	2	2	0	0	0	3	2	3	5	2	1	1	3	0	2	0	5
ID21	DNA/hAT-Charlie	Charlie1a	GTTGACATTTGCTTTGATGTATAACAGCAGTAATGGAGACTA	1	0	0	0	1	0	0	0	0	0	1	0	1	5	0	0	2	4	0	7	0	0	0	0	0	0	0	1	0	4	0	5
ID22	DNA/hAT-Charlie	Charlie1a	TGCTACCATAGTCTCCATTACTGCTGTTATACATCAAAGCAA	2	0	0	0	1	0	0	0	0	0	1	0	1	5	0	0	2	4	0	7	0	0	0	0	0	0	1	1	0	4	0	5
ID23	DNA/hAT-Charlie	Charlie1a	TGCTTTGATGTATAACAGCAGTAATGGAGACTATGGTAGCAA	0	0	0	0	1	0	0	0	0	0	1	0	1	5	0	0	2	1	0	7	0	0	0	0	0	0	1	1	0	4	0	5
ID24	DNA/hAT-Charlie	MER5A1	AACAGTTGTGGGTGGGGCCTGAGAGTCTGAGTTTCTCACAAG	1	0	0	0	0	0	0	0	0	2	0	0	0	0	0	6	1	0	6	25	2	0	1	0	0	0	0	5	2	0	0	0
ID25	DNA/hAT-Charlie	MER5A1	ACAGTTGTGGGTGGGGCCTGAGAGTCTGAGTTTCTCACAAGC	1	0	0	0	0	0	0	0	0	2	0	0	0	0	0	6	1	0	4	25	2	0	1	0	0	0	0	5	1	0	0	0
ID26	DNA/hAT-Charlie	MER5A1	CAACAGTTGTGGGTGGGGCCTGAGAGTCTGAGTTTCTCACAA	1	0	0	0	0	0	0	0	0	2	0	0	0	0	0	7	0	0	4	25	2	0	1	0	0	0	0	5	2	0	0	0
ID27	DNA/hAT-Charlie	MER5A	AACTCAGTAGGTCTGGAGCAGGGTCTGAGAATGTGCATTGCA	0	3	3	0	0	1	3	0	1	2	0	1	2	2	0	5	1	0	2	0	0	0	1	0	0	5	0	0	0	5	0	0
ID28	DNA/hAT-Charlie	MER5A	AAGAAGTTATGAATCTGCAGGTCTGAGGTGGGGTCATTAAAT	0	0	2	0	0	0	0	0	0	0	0	0	0	5	0	8	0	0	0	6	0	3	0	0	0	3	0	5	0	0	0	0
ID29	DNA/hAT-Charlie	MER5A	AATGCACATTCTCAGACCCTGCTCCAGACCTACTGAGTTGGA	0	3	3	0	0	0	3	0	1	0	0	1	0	2	0	5	0	4	2	0	0	0	1	1	0	7	0	0	0	5	0	0
ID30	DNA/hAT-Charlie	MER5A	ACTCAGTAGGTCTGGAGCAGGGTCTGAGAATGTGCATTGCAA	0	3	3	0	0	1	3	0	1	2	0	1	2	0	0	5	1	0	2	0	0	0	1	0	0	5	0	0	0	5	0	0
ID31	DNA/hAT-Charlie	MER5A	AGAAGTTATGAATCTGCAGGTCTGAGGTGGGGTCATTAAATA	0	0	2	0	3	0	0	0	0	0	0	0	0	0	0	8	0	0	0	6	0	3	0	0	0	3	0	5	0	0	0	0
ID32	DNA/hAT-Charlie	MER5A	AGCCATCAGGGTTTTACAGTCCTCCAGGTGCTACTGAAGCAC	1	3	1	0	1	1	7	0	0	0	0	1	1	0	1	2	0	1	4	0	0	0	0	1	0	6	0	0	2	6	0	0
ID33	DNA/hAT-Charlie	MER5A	AGTGTGCTTCAGTAGCACCTGGAGGACTGTAAAACCCTGATG	1	2	0	0	1	1	5	0	0	0	0	1	1	0	0	2	0	1	0	0	0	0	0	0	0	5	0	0	2	6	0	0
ID34	DNA/hAT-Charlie	MER5A	ATCAGGGTTTTACAGTCCTCCAGGTGCTACTGAAGCACACTG	1	2	0	0	1	1	5	0	0	0	0	1	1	0	0	2	0	1	0	0	0	0	0	0	0	5	0	0	2	6	0	0
ID35	DNA/hAT-Charlie	MER5A	ATGCACATTCTCAGACCCTGCTCCAGACCTACTGAGTTGGAA	0	4	3	0	0	1	3	0	1	3	0	1	2	0	0	5	0	4	2	0	0	0	1	1	0	8	0	0	0	5	0	0
ID36	DNA/hAT-Charlie	MER5A	ATTTCCAACTCAGTAGGTCTGGAGCAGGGTCTGAGAATGTGC	0	4	3	0	0	1	3	0	1	3	0	1	2	0	0	5	0	4	2	0	0	0	1	1	0	8	0	0	0	5	0	0
ID37	DNA/hAT-Charlie	MER5A	CAACTCAGTAGGTCTGGAGCAGGGTCTGAGAATGTGCATTGC	0	3	3	0	0	1	3	0	1	3	0	1	2	2	0	5	1	4	2	0	0	0	0	1	0	5	0	0	0	5	0	0
ID38	DNA/hAT-Charlie	MER5A	CAATGCACATTCTCAGACCCTGCTCCAGACCTACTGAGTTGG	0	3	3	0	0	1	3	0	1	3	0	1	2	2	0	5	1	4	2	0	0	0	0	1	0	7	0	0	0	5	0	0
ID39	DNA/hAT-Charlie	MER5A	CCATCAGGGTTTTACAGTCCTCCAGGTGCTACTGAAGCACAC	1	2	0	0	1	1	5	0	0	0	0	1	1	0	1	2	0	1	1	0	0	0	0	1	0	5	0	0	2	6	0	0
ID40	DNA/hAT-Charlie	MER5A	CCGCTAGCCATCAGGGTTTTACAGTCCTCCAGGTGCTACTGA	1	2	0	0	1	1	8	0	0	0	0	0	1	0	0	2	0	1	3	0	0	0	0	0	0	5	0	0	2	6	0	0
ID41	DNA/hAT-Charlie	MER5A	CGCTAGCCATCAGGGTTTTACAGTCCTCCAGGTGCTACTGAA	1	2	0	0	1	1	8	0	0	0	0	0	1	0	0	2	0	1	3	0	0	0	0	0	0	5	0	0	2	6	0	0
ID42	DNA/hAT-Charlie	MER5A	CTAAGAAGTTATGAATCTGCAGGTCTGAGGTGGGGTCATTAA	0	0	2	0	3	0	0	0	0	0	0	0	1	4	0	8	0	0	0	6	0	3	0	0	0	3	0	6	0	0	0	0
ID43	DNA/hAT-Charlie	MER5A	CTAGCCATCAGGGTTTTACAGTCCTCCAGGTGCTACTGAAGC	0	3	1	0	1	1	7	0	0	0	0	1	1	0	0	2	0	1	4	0	0	0	0	1	0	6	0	0	2	6	0	0
ID44	DNA/hAT-Charlie	MER5A	CTTCAGTAGCACCTGGAGGACTGTAAAACCCTGATGGCTAGC	1	2	1	0	1	1	8	0	0	0	0	1	1	0	0	2	0	1	4	0	0	0	0	1	0	5	0	0	2	6	0	0
ID45	DNA/hAT-Charlie	MER5A	GAAGTTATGAATCTGCAGGTCTGAGGTGGGGTCATTAAATAC	0	0	1	0	2	0	0	0	0	0	0	0	0	5	0	8	0	0	0	6	0	3	0	0	0	3	0	5	0	0	0	0
ID46	DNA/hAT-Charlie	MER5A	GCCATCAGGGTTTTACAGTCCTCCAGGTGCTACTGAAGCACA	1	2	0	0	1	1	7	0	0	0	0	1	1	0	1	2	0	1	1	0	0	0	0	1	0	5	0	0	2	6	0	0
ID47	DNA/hAT-Charlie	MER5A	TAAGAAGTTATGAATCTGCAGGTCTGAGGTGGGGTCATTAAA	0	0	2	0	3	0	0	0	0	0	0	0	1	4	0	8	0	0	0	6	0	3	0	0	0	3	0	5	0	0	0	0
ID48	DNA/hAT-Charlie	MER5A	TAGCCATCAGGGTTTTACAGTCCTCCAGGTGCTACTGAAGCA	1	3	1	0	1	1	7	0	0	0	0	1	1	0	0	2	0	1	4	0	0	0	0	1	0	6	0	0	2	6	0	0
ID49	DNA/hAT-Charlie	MER5A	TGCACATTCTCAGACCCTGCTCCAGACCTACTGAGTTGGAAA	0	4	3	0	0	1	3	0	1	3	0	1	2	0	0	5	0	4	2	0	0	0	1	1	0	8	0	0	0	5	0	0
ID50	DNA/hAT-Charlie	MER5B	AACCACTTAAGAGCTTTAAAAATGCTGATGCCCAATCCCCAC	6	2	0	0	2	0	8	0	0	2	0	0	2	4	2	0	2	2	1	0	0	1	0	4	0	3	0	2	0	7	0	2
ID51	DNA/hAT-Charlie	MER5B	ACCACTTAAGAGCTTTAAAAATGCTGATGCCCAATCCCCACA	6	2	0	0	2	0	8	0	0	2	0	0	2	4	2	0	2	2	1	0	0	1	0	4	0	3	0	2	0	7	0	2
ID52	DNA/hAT-Charlie	MER5B	ACTTAAGAGCTTTAAAAATGCTGATGCCCAATCCCCACACAC	6	2	0	0	2	0	7	0	0	3	0	0	2	1	2	0	2	3	1	0	0	1	0	4	0	3	0	2	0	7	0	1
ID53	DNA/hAT-Charlie	MER5B	AGCTCCAGATATGTTTCTAATGAGCAGCCATGTTTAAAAACA	0	16	9	0	0	6	15	0	5	6	13	11	0	13	12	10	5	8	13	7	8	7	9	11	9	12	9	12	10	12	7	15
ID54	DNA/hAT-Charlie	MER5B	AGTTGTTTTTAAACATGGCTGCTCATTAGAAACATATCTGGA	0	15	11	7	10	13	15	11	7	5	16	7	12	0	13	11	6	8	21	7	6	10	12	11	12	13	8	13	10	16	11	16
ID55	DNA/hAT-Charlie	MER5B	ATATCAGAATTATCTTGGAATTTTTTGAAAAATACAAATGCC	0	14	15	13	0	19	18	0	14	11	8	6	21	0	14	18	7	15	10	6	17	12	16	12	11	14	11	11	13	17	12	17
ID56	DNA/hAT-Charlie	MER5B	ATCAGAATTATCTTGGAATTTTTTGAAAAATACAAATGCCCA	0	14	14	15	9	19	18	18	13	13	10	9	20	18	14	19	6	15	11	7	18	10	15	15	12	16	13	10	13	19	10	17
ID57	DNA/hAT-Charlie	MER5B	CACTTAAGAGCTTTAAAAATGCTGATGCCCAATCCCCACACA	6	2	0	0	2	0	7	0	0	3	0	0	2	1	2	0	2	2	1	0	0	1	0	4	0	3	0	2	0	7	0	1
ID58	DNA/hAT-Charlie	MER5B	CATATCAGAATTATCTTGGAATTTTTTGAAAAATACAAATGC	0	15	15	14	10	16	17	20	14	13	7	6	20	11	14	19	6	15	11	7	17	10	18	13	12	14	6	9	13	14	11	17
ID59	DNA/hAT-Charlie	MER5B	CATTTGTATTTTTCAAAAAATTCCAAGATAATTCTGATATGC	17	13	14	15	10	18	18	21	13	11	6	7	18	10	15	16	8	18	9	6	17	10	19	14	14	12	6	9	13	16	11	17
ID60	DNA/hAT-Charlie	MER5B	CCACTTAAGAGCTTTAAAAATGCTGATGCCCAATCCCCACAC	6	2	0	0	2	0	7	0	0	2	0	0	2	1	2	0	2	2	1	0	0	1	0	4	0	3	0	2	0	7	0	1
ID61	DNA/hAT-Charlie	MER5B	CTCCAGATATGTTTCTAATGAGCAGCCATGTTTAAAAACAAC	0	13	10	0	0	0	14	0	5	5	0	8	0	14	14	11	0	9	16	7	8	8	10	11	9	11	8	12	11	15	7	15
ID62	DNA/hAT-Charlie	MER5B	CTGGGCATTTGTATTTTTCAAAAAATTCCAAGATAATTCTGA	19	12	14	11	9	17	17	17	11	13	7	10	16	16	12	18	5	14	9	7	17	10	14	14	10	14	9	9	12	17	11	16
ID63	DNA/hAT-Charlie	MER5B	CTTAAGAGCTTTAAAAATGCTGATGCCCAATCCCCACACACA	6	2	0	0	2	0	7	0	0	3	1	0	2	1	2	0	2	3	1	0	0	1	0	4	0	3	0	2	0	7	0	1
ID64	DNA/hAT-Charlie	MER5B	GCTCCAGATATGTTTCTAATGAGCAGCCATGTTTAAAAACAA	0	15	9	4	9	6	15	7	5	5	13	9	11	13	13	11	5	8	14	7	8	8	9	10	9	12	8	11	9	12	6	15
ID65	DNA/hAT-Charlie	MER5B	GGGCATTTGTATTTTTCAAAAAATTCCAAGATAATTCTGATA	17	14	14	15	7	18	17	18	12	12	8	7	19	18	12	19	6	13	10	7	18	10	18	13	13	16	13	10	12	18	11	16
ID66	DNA/hAT-Tip100	MER45A	AAATATTAGGCATTTCAAGACAGGGAGAGCAGAGGTGGGGTC	5	5	4	0	4	4	7	0	3	7	4	0	6	1	0	4	3	1	12	0	2	0	3	0	0	5	1	2	8	5	0	8
ID67	DNA/hAT-Tip100	MER45A	AAGAAATATTAGGCATTTCAAGACAGGGAGAGCAGAGGTGGG	5	5	4	0	4	6	7	0	6	6	5	0	6	3	0	4	3	1	11	0	2	0	2	0	0	5	1	2	8	5	0	8
ID68	DNA/hAT-Tip100	MER45A	AAGACAGGGAGAGCAGAGGTGGGGTCCCTTCTGAGTGTGGGG	5	7	4	1	5	2	3	0	1	11	5	0	5	6	0	4	4	4	14	0	0	0	2	0	0	5	0	3	9	11	0	5
ID69	DNA/hAT-Tip100	MER45A	AAGGGACCCCACCTCTGCTCTCCCTGTCTTGAAATGCCTAAT	0	5	3	0	3	3	7	0	3	6	4	0	5	2	0	3	3	1	11	0	2	0	3	0	0	4	1	2	7	5	0	8
ID70	DNA/hAT-Tip100	MER45A	AATATTAGGCATTTCAAGACAGGGAGAGCAGAGGTGGGGTCC	5	5	4	0	4	4	7	0	3	7	4	0	6	1	0	4	3	1	11	0	2	0	3	0	0	5	1	2	8	5	0	8
ID71	DNA/hAT-Tip100	MER45A	ACACTCAGAAGGGACCCCACCTCTGCTCTCCCTGTCTTGAAA	7	5	4	1	5	3	3	0	1	11	10	0	6	8	0	4	5	3	15	0	2	0	2	0	0	3	0	4	11	10	0	9
ID72	DNA/hAT-Tip100	MER45A	ACCCCACCTCTGCTCTCCCTGTCTTGAAATGCCTAATATTTC	0	5	4	0	4	5	7	0	3	6	5	0	6	2	0	4	3	1	11	0	2	0	3	0	0	5	1	2	8	5	0	8
ID73	DNA/hAT-Tip100	MER45A	ACCTCTGCTCTCCCTGTCTTGAAATGCCTAATATTTCTTGAA	5	7	6	2	6	5	8	1	4	6	6	0	6	2	0	6	4	1	11	0	3	0	2	0	0	6	2	2	9	5	0	7
ID74	DNA/hAT-Tip100	MER45A	ACTCAGAAGGGACCCCACCTCTGCTCTCCCTGTCTTGAAATG	0	4	2	0	4	4	5	0	2	11	6	0	6	8	0	3	5	3	15	0	2	0	2	0	0	3	0	4	12	10	0	9
ID75	DNA/hAT-Tip100	MER45A	AGAAATATTAGGCATTTCAAGACAGGGAGAGCAGAGGTGGGG	0	5	4	0	4	5	7	0	3	6	5	0	6	2	0	4	3	1	11	0	2	0	2	0	0	5	1	2	8	5	0	8
ID76	DNA/hAT-Tip100	MER45A	AGAAGGGACCCCACCTCTGCTCTCCCTGTCTTGAAATGCCTA	4	4	2	0	4	3	7	0	2	6	4	0	7	2	0	4	5	1	12	0	2	0	2	0	0	3	1	3	8	5	0	8
ID77	DNA/hAT-Tip100	MER45A	AGACAGGGAGAGCAGAGGTGGGGTCCCTTCTGAGTGTGGGGC	5	7	4	1	6	2	4	0	1	11	6	0	5	7	0	4	4	4	14	0	0	0	2	0	0	5	0	3	9	9	0	5
ID78	DNA/hAT-Tip100	MER45A	AGGCATTTCAAGACAGGGAGAGCAGAGGTGGGGTCCCTTCTG	0	4	2	0	4	3	7	0	2	10	5	0	7	5	0	4	5	2	14	0	2	0	2	0	0	3	2	3	9	10	0	9
ID79	DNA/hAT-Tip100	MER45A	AGGGACCCCACCTCTGCTCTCCCTGTCTTGAAATGCCTAATA	0	5	3	0	0	0	7	0	3	6	0	0	0	2	0	3	3	1	11	0	2	0	3	0	0	4	1	2	7	5	0	8
ID80	DNA/hAT-Tip100	MER45A	ATATTAGGCATTTCAAGACAGGGAGAGCAGAGGTGGGGTCCC	5	5	3	0	3	4	7	0	3	6	4	0	6	1	0	3	3	1	11	0	2	0	3	0	0	4	1	2	7	5	0	8
ID81	DNA/hAT-Tip100	MER45A	ATTTCAAGACAGGGAGAGCAGAGGTGGGGTCCCTTCTGAGTG	0	5	4	0	0	3	3	0	1	11	10	0	0	8	0	3	5	3	15	0	2	0	2	0	0	3	0	4	12	10	0	9
ID82	DNA/hAT-Tip100	MER45A	CAAGAAATATTAGGCATTTCAAGACAGGGAGAGCAGAGGTGG	4	7	6	3	6	5	7	1	6	6	5	0	6	2	0	6	4	1	11	0	3	0	2	0	0	6	2	2	9	4	0	7
ID83	DNA/hAT-Tip100	MER45A	CAAGACAGGGAGAGCAGAGGTGGGGTCCCTTCTGAGTGTGGG	4	6	4	1	5	3	4	0	1	11	5	0	5	4	0	3	4	3	15	0	0	0	2	0	0	4	0	3	8	10	0	5
ID84	DNA/hAT-Tip100	MER45A	CACACTCAGAAGGGACCCCACCTCTGCTCTCCCTGTCTTGAA	7	5	4	1	5	3	3	0	1	11	10	0	6	0	0	4	5	3	15	0	2	0	2	0	0	3	0	4	11	11	0	9
ID85	DNA/hAT-Tip100	MER45A	CACCTCTGCTCTCCCTGTCTTGAAATGCCTAATATTTCTTGA	5	7	6	5	6	5	7	2	5	6	5	0	6	2	0	6	4	1	11	0	3	0	2	0	0	6	2	2	9	5	0	7
ID86	DNA/hAT-Tip100	MER45A	CCACACTCAGAAGGGACCCCACCTCTGCTCTCCCTGTCTTGA	7	5	3	1	5	3	4	0	1	11	8	0	5	8	0	3	5	3	15	0	0	0	2	0	0	3	0	4	9	13	0	9
ID87	DNA/hAT-Tip100	MER45A	CCCCTTGTTCAAGAAATATTAGGCATTTCAAGACAGGGAGAG	5	4	3	1	4	1	11	0	2	6	3	0	0	1	0	5	2	1	7	0	2	0	3	0	0	4	0	1	4	10	0	10
ID88	DNA/hAT-Tip100	MER45A	CCCTTCTGAGTGTGGGGCCCTTTGGACAGTAGAGGTCACAGG	6	1	0	5	2	0	2	1	5	4	1	0	0	2	0	0	1	1	4	0	0	0	4	0	0	1	1	1	3	9	0	4
ID89	DNA/hAT-Tip100	MER45A	CCCTTGTTCAAGAAATATTAGGCATTTCAAGACAGGGAGAGC	5	4	3	3	4	2	10	1	2	5	4	0	0	2	0	5	3	2	7	0	2	0	3	0	0	4	2	2	5	8	0	10
ID90	DNA/hAT-Tip100	MER45A	CCTCTGCTCTCCCTGTCTTGAAATGCCTAATATTTCTTGAAC	5	6	6	2	5	5	10	1	3	7	5	0	6	2	0	6	4	1	12	0	3	0	2	0	0	5	2	2	10	5	0	7
ID91	DNA/hAT-Tip100	MER45A	CCTTCTGAGTGTGGGGCCCTTTGGACAGTAGAGGTCACAGGC	5	3	0	5	3	0	2	1	5	3	3	0	1	2	0	2	1	1	3	0	0	0	4	0	0	2	1	1	4	9	0	4
ID92	DNA/hAT-Tip100	MER45A	CCTTGTTCAAGAAATATTAGGCATTTCAAGACAGGGAGAGCA	5	7	4	3	5	2	11	1	4	8	4	0	1	2	0	6	4	2	9	0	2	0	3	0	0	7	2	2	7	7	0	12
ID93	DNA/hAT-Tip100	MER45A	CTCAGAAGGGACCCCACCTCTGCTCTCCCTGTCTTGAAATGC	6	4	2	0	4	4	5	0	2	10	5	0	7	4	0	3	5	2	14	0	2	0	2	0	0	3	1	4	10	10	0	9
ID94	DNA/hAT-Tip100	MER45A	CTCTGCTCTCCCTGTCTTGAAATGCCTAATATTTCTTGAACA	6	5	3	2	3	3	11	1	3	8	4	0	1	0	0	3	4	2	9	0	3	0	3	0	0	4	2	2	10	8	0	9
ID95	DNA/hAT-Tip100	MER45A	CTGCTCTCCCTGTCTTGAAATGCCTAATATTTCTTGAACAAG	5	7	5	3	5	2	10	1	6	8	5	0	1	2	0	6	4	2	9	0	3	0	3	0	0	6	2	2	7	6	0	11
ID96	DNA/hAT-Tip100	MER45A	CTGGCCTGTGACCTCTACTGTCCAAAGGGCCCCACACTCAGA	5	3	0	5	4	1	3	1	0	2	3	0	2	1	0	2	1	2	2	0	0	0	1	0	0	2	1	1	6	9	0	4
ID97	DNA/hAT-Tip100	MER45A	CTTCTGAGTGTGGGGCCCTTTGGACAGTAGAGGTCACAGGCC	5	3	0	5	4	0	3	1	4	3	3	0	1	2	0	2	1	1	3	0	0	0	2	0	0	2	1	1	6	9	0	4
ID98	DNA/hAT-Tip100	MER45A	GAAGGGACCCCACCTCTGCTCTCCCTGTCTTGAAATGCCTAA	4	5	2	0	4	3	7	0	2	6	4	0	6	2	0	4	3	1	11	0	2	0	2	0	0	4	1	2	8	5	0	8
ID99	DNA/hAT-Tip100	MER45A	GACAGGGAGAGCAGAGGTGGGGTCCCTTCTGAGTGTGGGGCC	5	6	4	1	5	2	4	0	1	11	5	0	5	6	0	3	4	4	14	0	0	0	2	0	0	5	0	3	9	8	0	5
ID100	DNA/hAT-Tip100	MER45A	GACCTCTACTGTCCAAAGGGCCCCACACTCAGAAGGGACCCC	6	1	0	0	2	1	2	0	2	4	1	0	0	2	0	0	0	2	7	0	0	0	4	0	0	1	1	0	2	6	0	3
ID101	DNA/hAT-Tip100	MER45A	GGCATTTCAAGACAGGGAGAGCAGAGGTGGGGTCCCTTCTGA	6	4	2	0	4	3	5	0	2	10	6	0	7	5	0	4	5	2	14	0	2	0	2	0	0	3	2	3	9	10	0	9
ID102	DNA/hAT-Tip100	MER45A	GGGTCCCTTCTGAGTGTGGGGCCCTTTGGACAGTAGAGGTCA	7	1	0	0	2	0	2	0	2	4	1	0	0	2	0	0	0	2	7	0	0	0	4	0	0	1	1	0	2	7	0	3
ID103	DNA/hAT-Tip100	MER45A	GGTCCCTTCTGAGTGTGGGGCCCTTTGGACAGTAGAGGTCAC	0	1	0	0	2	0	3	0	2	4	1	0	0	2	0	0	0	1	7	0	0	0	3	0	0	1	1	0	3	10	0	5
ID104	DNA/hAT-Tip100	MER45A	TCTGCTCTCCCTGTCTTGAAATGCCTAATATTTCTTGAACAA	5	6	4	2	4	2	11	1	3	8	5	0	1	2	0	5	4	2	9	0	3	0	3	0	0	5	2	2	10	8	0	10
ID105	DNA/hAT-Tip100	MER45A	TGGCCTGTGACCTCTACTGTCCAAAGGGCCCCACACTCAGAA	5	3	0	5	4	0	3	1	0	2	3	0	1	2	0	2	1	2	2	0	0	0	2	0	0	2	1	1	6	9	0	4
ID106	DNA/hAT-Tip100	MER97b	AAAAAAATCTGCAAAAGATACAGCTTAAGCAGCCCCAGTTAA	1	0	0	0	0	2	1	0	0	7	0	0	3	2	0	2	13	3	19	0	0	0	0	0	0	1	0	325	0	0	0	0
ID107	DNA/hAT-Tip100	MER97b	AAAAAAGTTTGTACCTTGCAGTGAATACTTTGTTTCACTGAT	1	0	0	0	0	1	13	0	0	3	1	0	3	0	0	2	0	0	10	0	0	0	1	1	0	6	5	0	3	2	0	0
ID108	DNA/hAT-Tip100	MER97b	AAAAAATCTGCAAAAGATACAGCTTAAGCAGCCCCAGTTAAC	1	0	0	0	0	2	1	0	0	5	0	0	2	2	0	2	15	3	9	0	0	0	0	1	0	1	1	382	0	0	0	0
ID109	DNA/hAT-Tip100	MER97b	AAAAAGTTTGTACCTTGCAGTGAATACTTTGTTTCACTGATT	2	0	0	0	0	4	13	0	0	4	1	0	3	0	0	2	1	0	11	0	0	0	0	2	0	15	5	0	3	2	0	0
ID110	DNA/hAT-Tip100	MER97b	AAAAGATACAGTTTAAGCTGCCTCAATTAAGGCAATTTTCTT	0	0	0	0	0	0	2	0	0	12	0	0	0	6	0	0	6	1	11	0	0	2	0	0	0	0	2	145	0	2	0	0
ID111	DNA/hAT-Tip100	MER97b	AAAAGTTTGTACCTTGCAGTGAATACTTTGTTTCACTGATTT	0	0	0	0	0	4	13	0	0	4	0	0	3	0	0	2	1	0	11	0	0	0	0	2	0	15	5	0	0	2	0	0
ID112	DNA/hAT-Tip100	MER97b	AAAGAAAATTGCCTTAATTGAGGCAGCTTAAACTGTATCTTT	0	0	0	0	0	0	2	0	0	11	0	0	0	6	0	0	6	1	11	0	0	2	0	0	0	0	2	143	0	2	0	0
ID113	DNA/hAT-Tip100	MER97b	AAAGTTTGTACCTTGCAGTGAATACTTTGTTTCACTGATTTA	0	0	0	0	0	0	13	0	0	4	0	0	0	0	0	2	1	0	11	0	0	0	0	2	0	15	5	0	0	2	0	0
ID114	DNA/hAT-Tip100	MER97b	AAATGAAATTCATTCTTAATTGTCAGTTATTTTGAGACTATG	1	0	0	0	0	0	2	0	0	10	0	0	1	1	0	62	14	0	11	0	0	1	0	0	1	0	2	111	0	0	0	0
ID115	DNA/hAT-Tip100	MER97b	AAATTCATTCTTAATTATCAGTTATTTTGAGACTATGGAACA	0	0	0	0	0	0	0	0	0	2	0	0	0	5	0	0	13	0	0	0	0	0	0	0	0	0	1	544	0	0	0	0
ID116	DNA/hAT-Tip100	MER97b	AAATTCATTCTTAATTGTCAGTTATTTTGAGACTATGGAACA	1	0	0	0	0	0	2	0	0	13	0	0	2	2	0	36	10	0	9	0	0	1	0	0	1	0	1	75	0	5	0	0
ID117	DNA/hAT-Tip100	MER97b	AAGATACAGTTTAAGCTGCCTCAATTAAGGCAATTTTCTTTG	0	0	0	0	0	0	2	0	0	11	0	0	0	5	0	0	6	1	11	0	0	2	0	0	0	0	2	120	0	2	0	0
ID118	DNA/hAT-Tip100	MER97b	AAGTTTGTACCTTGCAGTGAATACTTTGTTTCACTGATTTAG	0	0	0	0	0	4	13	0	0	5	0	0	3	0	0	2	1	0	12	0	0	0	0	2	0	15	5	0	0	2	0	0
ID119	DNA/hAT-Tip100	MER97b	AATGAAATTCATTCTTAATTGTCAGTTATTTTGAGACTATGG	1	0	0	0	0	0	2	0	0	12	0	0	1	1	0	63	9	0	11	0	0	1	0	0	1	0	2	72	0	0	0	0
ID120	DNA/hAT-Tip100	MER97b	AATTAAGGCAATTTTCTTTGGTCCATACTTTCAAAATAACTG	0	0	0	0	0	1	0	0	0	12	0	0	0	3	0	1	9	0	8	0	0	2	0	0	0	0	2	152	0	0	0	0
ID121	DNA/hAT-Tip100	MER97b	AATTCATTCTTAATTATCAGTTATTTTGAGACTATGGAACAA	0	0	0	0	0	0	0	0	0	2	0	0	0	5	0	0	13	0	0	0	0	0	0	0	0	0	1	543	0	0	0	0
ID122	DNA/hAT-Tip100	MER97b	AATTCATTCTTAATTGTCAGTTATTTTGAGACTATGGAACAA	1	0	0	0	0	0	2	0	0	13	0	0	2	2	0	36	10	0	9	0	0	1	0	0	1	0	1	75	0	5	0	0
ID123	DNA/hAT-Tip100	MER97b	ACAGTTTAAGCTGCCTCAATTAAGGCAATTTTCTTTGGTCCA	0	0	0	0	0	0	2	0	0	9	0	0	0	5	0	0	8	1	10	0	0	3	0	0	0	0	2	130	0	2	0	0
ID124	DNA/hAT-Tip100	MER97b	ACCAAAGAAAATTGCCTTAATTGAGGCAGCTTAAACTGTATC	0	0	0	0	0	0	2	0	0	10	0	0	0	5	0	0	0	1	10	0	0	3	0	0	0	0	2	125	0	2	0	0
ID125	DNA/hAT-Tip100	MER97b	AGAATGAATTTCATTTAAAACCTATGTTTCAAATTCAGCAAG	0	0	0	0	0	0	0	0	0	0	0	0	0	0	0	0	11	0	3	0	0	0	0	0	0	12	0	74	0	0	0	0
ID126	DNA/hAT-Tip100	MER97b	AGATACAGTTTAAGCTGCCTCAATTAAGGCAATTTTCTTTGG	0	0	0	0	0	0	2	0	0	0	0	0	0	5	0	0	0	1	11	0	0	2	0	0	0	0	2	118	0	2	0	0
ID127	DNA/hAT-Tip100	MER97b	AGGTTTTAAATGAAATTCATTCTTAATTGTCAGTTATTTTGA	1	0	0	0	0	0	2	0	0	12	0	0	1	2	0	61	21	0	14	0	0	1	0	0	0	0	1	108	0	0	0	0
ID128	DNA/hAT-Tip100	MER97b	AGTCTCAAAATAACTGACAATTAAGAATGAATTTCATTTAAA	1	0	0	0	0	0	2	0	0	13	0	0	1	0	0	62	12	0	13	0	0	0	0	0	1	0	1	94	0	0	0	0
ID129	DNA/hAT-Tip100	MER97b	AGTTATTTTGAAAGTATGGACCAAAGAAAATTGCCTTAATTG	0	0	0	0	0	1	0	0	0	12	0	0	1	3	0	1	9	0	9	0	0	2	0	0	0	0	2	156	0	0	0	0
ID130	DNA/hAT-Tip100	MER97b	AGTTTAAGCTGCCTCAATTAAGGCAATTTTCTTTGGTCCATA	0	0	0	0	0	0	2	0	0	10	0	0	0	5	0	0	8	1	12	0	0	4	0	0	0	0	2	132	0	2	0	0
ID131	DNA/hAT-Tip100	MER97b	AGTTTGTACCTTGCAGTGAATACTTTGTTTCACTGATTTAGA	0	0	0	0	0	4	13	0	0	6	0	0	0	0	0	2	1	2	12	0	0	0	0	2	0	15	5	0	0	2	0	0
ID132	DNA/hAT-Tip100	MER97b	ATACAGTTTAAGCTGCCTCAATTAAGGCAATTTTCTTTGGTC	0	0	0	0	0	0	2	0	0	9	0	0	0	5	0	0	8	1	10	0	0	3	0	0	0	0	2	130	0	2	0	0
ID133	DNA/hAT-Tip100	MER97b	ATAGTCTCAAAATAACTGACAATTAAGAATGAATTTCATTTA	1	0	0	0	0	0	2	0	0	10	0	0	1	0	0	62	12	0	12	0	0	1	0	0	1	0	2	94	0	0	0	0
ID134	DNA/hAT-Tip100	MER97b	ATGAAATTCATTCTTAATTGTCAGTTATTTTGAGACTATGGA	0	0	0	0	0	0	2	0	0	11	0	0	1	1	0	63	9	0	10	0	0	2	0	0	1	0	2	72	0	0	0	0
ID135	DNA/hAT-Tip100	MER97b	ATGGACCAAAGAAAATTGCCTTAATTGAGGCAGCTTAAACTG	0	0	0	0	0	0	2	0	0	10	0	0	0	5	0	0	8	1	10	0	0	3	0	0	0	0	2	130	0	2	0	0
ID136	DNA/hAT-Tip100	MER97b	ATTAAGGCAATTTTCTTTGGTCCATACTTTCAAAATAACTGA	0	0	0	0	0	1	0	0	0	12	0	0	0	3	0	1	9	0	8	0	0	2	0	0	0	0	2	153	0	0	0	0
ID137	DNA/hAT-Tip100	MER97b	ATTCATTCTTAATTATCAGTTATTTTGAGACTATGGAACAAA	0	0	0	0	0	0	0	0	0	2	0	0	0	5	0	0	13	0	0	0	0	0	0	0	0	0	1	538	0	0	0	0
ID138	DNA/hAT-Tip100	MER97b	ATTCATTCTTAATTGTCAGTTATTTTGAGACTATGGAACAAA	0	0	0	0	0	0	2	0	0	13	0	0	2	2	0	36	10	0	9	0	0	1	0	0	1	0	1	76	0	5	0	0
ID139	DNA/hAT-Tip100	MER97b	ATTCTTAATTGTCAGTTATTTTGAGACTATGGAACAAAGAAA	0	0	0	0	0	0	3	0	0	7	0	0	1	1	0	36	8	0	6	0	0	1	0	1	1	0	1	74	0	5	0	0
ID140	DNA/hAT-Tip100	MER97b	ATTTTCTTTGTTCCATAGTCTCAAAATAACTGACAATTAAGA	0	0	0	0	0	1	3	0	0	9	0	0	1	1	0	18	7	0	6	0	0	1	0	1	1	0	1	75	0	5	0	0
ID141	DNA/hAT-Tip100	MER97b	ATTTTGAAAGTATGGACCAAAGAAAATTGCCTTAATTGAGGC	0	0	0	0	0	1	0	0	0	14	0	0	1	3	0	1	8	0	13	0	0	2	0	0	0	0	2	145	0	0	0	0
ID142	DNA/hAT-Tip100	MER97b	CAAAATAACTGACAATTAAGAATGAATTTCATTTAAAACCTA	0	0	0	0	0	0	1	0	0	0	0	0	0	0	0	61	0	0	13	0	0	1	0	0	0	0	1	108	0	0	0	0
ID143	DNA/hAT-Tip100	MER97b	CAACACAGGAGAGAGGAGTAATTTTTAATACTCACTCAACAG	0	0	0	0	0	0	0	0	0	12	0	0	1	1	0	0	4	0	18	0	0	0	0	0	0	0	0	76	0	0	0	0
ID144	DNA/hAT-Tip100	MER97b	CATTCTTAATTGTCAGTTATTTTGAGACTATGGAACAAAGAA	0	0	0	0	0	0	3	0	0	8	0	0	2	1	0	36	8	0	5	0	0	1	0	1	1	0	1	74	0	5	0	0
ID145	DNA/hAT-Tip100	MER97b	CCTCAATTAAGGCAATTTTCTTTGGTCCATACTTTCAAAATA	0	0	0	0	0	1	0	0	0	14	0	0	1	3	0	1	8	0	13	0	0	2	0	0	0	0	2	146	0	0	0	0
ID146	DNA/hAT-Tip100	MER97b	CTCAAAATAACTGACAATTAAGAATGAATTTCATTTAAAACC	0	0	0	0	0	0	2	0	0	11	0	0	1	1	0	61	13	0	11	0	0	0	0	0	0	0	1	81	0	0	0	0
ID147	DNA/hAT-Tip100	MER97b	CTTAATTGTCAGTTATTTTGAGACTATGGAACAAAGAAAATA	1	0	0	0	0	1	18	0	0	11	0	0	3	0	0	20	7	0	6	0	0	1	0	1	1	0	2	76	0	5	0	0
ID148	DNA/hAT-Tip100	MER97b	CTTTGTTCCATAGTCTCAAAATAACTGACAATTAAGAATGAA	1	0	0	0	0	0	2	0	0	13	0	0	2	0	0	36	8	0	9	0	0	1	0	0	1	0	1	76	0	5	0	0
ID149	DNA/hAT-Tip100	MER97b	GAAATTCATTCTTAATTATCAGTTATTTTGAGACTATGGAAC	0	0	0	0	0	0	0	0	0	2	0	0	0	5	0	0	13	0	0	0	0	0	0	0	0	0	1	535	0	0	0	0
ID150	DNA/hAT-Tip100	MER97b	GAAATTCATTCTTAATTGTCAGTTATTTTGAGACTATGGAAC	1	0	0	0	0	0	2	0	0	13	0	0	2	2	0	36	9	0	10	0	0	1	0	0	1	0	1	72	0	5	0	0
ID151	DNA/hAT-Tip100	MER97b	GGACCAAAGAAAATTGCCTTAATTGAGGCAGCTTAAACTGTA	0	0	0	0	0	0	2	0	0	10	0	0	0	5	0	0	8	1	10	0	0	3	0	0	0	0	2	129	0	2	0	0
ID152	DNA/hAT-Tip100	MER97b	GTCTAAATCAGTGAAACAAAGTATTCACTGCAAGGTACAAAC	2	0	0	0	0	4	12	0	0	6	0	0	5	0	0	2	1	2	11	0	0	0	0	2	0	14	5	0	0	1	0	0
ID153	DNA/hAT-Tip100	MER97b	GTCTCAAAATAACTGACAATTAAGAATGAATTTCATTTAAAA	1	0	0	0	0	0	2	0	0	12	0	0	1	0	0	61	12	0	12	0	0	0	0	0	1	0	1	80	0	0	0	0
ID154	DNA/hAT-Tip100	MER97b	GTTTTAAATGAAATTCATTCTTAATTGTCAGTTATTTTGAGA	0	0	0	0	0	0	2	0	0	0	0	0	0	1	0	60	0	0	12	0	0	0	0	0	1	0	1	82	0	0	0	0
ID155	DNA/hAT-Tip100	MER97b	TAATTGTCAGTTATTTTGAGACTATGGAACAAAGAAAATAAA	1	0	0	0	1	1	19	0	0	13	0	0	3	0	0	19	7	0	7	0	0	1	0	1	1	1	3	77	0	6	0	0
ID156	DNA/hAT-Tip100	MER97b	TAGGTTTATTTTCTTTGTTCCATAGTCTCAAAATAACTGACA	0	0	0	0	0	0	0	0	0	12	0	0	0	0	0	0	6	0	12	0	0	1	0	0	0	0	1	55	0	0	0	0
ID157	DNA/hAT-Tip100	MER97b	TAGTCTCAAAATAACTGACAATTAAGAATGAATTTCATTTAA	1	0	0	0	0	0	2	0	0	13	0	0	1	0	0	62	12	0	16	0	0	0	0	0	1	0	1	93	0	0	0	0
ID158	DNA/hAT-Tip100	MER97b	TCATTCTTAATTGTCAGTTATTTTGAGACTATGGAACAAAGA	0	0	0	0	0	0	3	0	0	13	0	0	2	1	0	36	8	0	9	0	0	1	0	0	1	0	1	74	0	5	0	0
ID159	DNA/hAT-Tip100	MER97b	TGAAATTCATTCTTAATTGTCAGTTATTTTGAGACTATGGAA	1	0	0	0	0	0	2	0	0	13	0	0	2	1	0	63	9	0	10	0	0	1	0	0	1	0	1	73	0	5	0	0
ID160	DNA/hAT-Tip100	MER97b	TGCCTCAATTAAGGCAATTTTCTTTGGTCCATACTTTCAAAA	0	0	0	0	0	1	0	0	0	13	0	0	1	3	0	1	7	0	13	0	0	2	0	0	0	0	2	145	0	0	0	0
ID161	DNA/hAT-Tip100	MER97b	TTAATTGTCAGTTATTTTGAGACTATGGAACAAAGAAAATAA	1	0	0	0	1	1	19	0	0	13	0	0	3	0	0	20	7	0	7	0	0	1	0	1	1	1	3	77	0	6	0	0
ID162	DNA/hAT-Tip100	MER97b	TTCTTAATTGTCAGTTATTTTGAGACTATGGAACAAAGAAAA	1	0	0	0	0	1	3	0	0	7	0	0	1	1	0	36	8	0	6	0	0	1	0	1	1	0	1	75	0	5	0	0
ID163	DNA/hAT-Tip100	MER97c	AAACAGAGAATACTTCATGGTTTGGAAGGCCTTGGTACCTCT	0	0	0	0	0	0	0	0	0	5	0	0	0	4	0	0	4	0	14	0	0	2	0	0	0	0	0	80	0	0	0	0
ID164	DNA/hAT-Tip100	MER97c	ACCAAGGCCTTCCAAACCATGAAGTATTCTCTGTTTAATGGA	0	0	0	0	0	0	0	0	0	7	0	0	0	3	0	0	6	0	13	0	0	0	0	0	0	0	0	102	0	0	0	0
ID165	DNA/hAT-Tip100	MER97c	AGTTTTAGTACTTATCTTTAAAAATTCATTATCTTCTATGAG	0	0	0	0	0	0	0	0	0	5	0	0	1	2	0	1	6	0	5	0	0	0	0	0	0	1	1	129	0	0	0	0
ID166	DNA/hAT-Tip100	MER97c	ATTAAACAGAGAATACTTCATGGTTTGGAAGGCCTTGGTACC	0	0	0	0	0	0	0	0	0	5	0	0	0	4	0	0	4	0	12	0	0	2	0	0	0	0	0	79	0	0	0	0
ID167	DNA/hAT-Tip100	MER97c	CATTAAACAGAGAATACTTCATGGTTTGGAAGGCCTTGGTAC	0	0	0	0	0	0	0	0	0	7	0	0	0	4	0	0	4	0	12	0	0	2	0	0	0	0	0	82	0	0	0	0
ID168	DNA/hAT-Tip100	MER97c	CCAAGGCCTTCCAAACCATGAAGTATTCTCTGTTTAATGGAA	0	0	0	0	0	0	0	0	0	8	0	0	0	3	0	0	7	0	13	0	0	0	0	0	0	0	0	130	0	0	0	0
ID169	DNA/hAT-Tip100	MER97c	CCATTAAACAGAGAATACTTCATGGTTTGGAAGGCCTTGGTA	0	0	0	0	0	0	0	0	0	7	0	0	0	3	0	0	4	0	13	0	0	0	0	0	0	0	0	87	0	0	0	0
ID170	DNA/hAT-Tip100	Zaphod3	AAAACCAAGTAAACGCTGGTTCTGTTTTGATTACCATCTCCA	0	0	0	0	0	0	1	0	0	5	0	0	1	3	0	0	7	4	6	0	0	0	0	1	0	0	0	238	0	0	0	0
ID171	DNA/hAT-Tip100	Zaphod3	AAAAGTATTTAATTACTGACATTATTTTAGAATACTGGAGTA	0	0	0	1	0	0	2	1	0	7	0	0	0	2	1	0	19	1	3	0	0	0	0	1	1	0	0	196	0	1	0	0
ID172	DNA/hAT-Tip100	Zaphod3	AAAATAATGTCAGTAATTAAATACTTTTCCTCTGCAAAACCA	0	0	0	0	0	0	3	0	0	6	0	4	0	5	1	0	20	0	14	0	0	0	0	0	0	0	0	173	0	2	0	0
ID173	DNA/hAT-Tip100	Zaphod3	AAAATATTAAAACCTGACATATATGACAACAAACGTTTAAAA	0	0	0	0	0	0	0	0	0	10	0	0	0	1	0	0	10	0	9	0	0	0	0	1	0	0	0	237	0	0	0	0
ID174	DNA/hAT-Tip100	Zaphod3	AAAATTTGGTTTTGCAGAGGAAAAGTATTTAATTACTGACAT	0	0	0	0	0	0	1	0	0	6	0	0	0	4	1	13	2	0	7	1	0	0	0	1	0	21	0	20	0	1	0	0
ID175	DNA/hAT-Tip100	Zaphod3	AAACCAACAGAATTTGGTTTTGCAGAGGAAAAGTATTTAATT	0	0	0	0	0	0	0	0	0	6	0	0	0	5	0	0	10	0	16	0	0	0	0	0	0	0	0	121	0	1	0	0
ID176	DNA/hAT-Tip100	Zaphod3	AAACCAAGTAAACGCTGGTTCTGTTTTGATTACCATCTCCAT	0	0	0	0	0	0	1	0	0	5	0	0	1	3	0	0	7	4	5	0	0	0	0	1	0	0	0	236	0	0	0	0
ID177	DNA/hAT-Tip100	Zaphod3	AAACGCTGGTTCTGTTTTGATTACCATCTCCATACTCCAGTA	0	0	0	0	0	0	14	0	0	4	0	0	0	2	0	1	0	7	5	0	0	0	0	0	0	10	0	30	0	0	0	0
ID178	DNA/hAT-Tip100	Zaphod3	AAACGTTTGTTGTCATATATGTCAGGTTTTAATATTTTATAT	0	0	0	0	0	0	0	0	0	9	0	0	0	0	0	0	9	0	8	0	0	0	0	1	0	0	0	217	0	0	0	0
ID179	DNA/hAT-Tip100	Zaphod3	AAAGTATTTAATTACTGACATTATTTTAGAATACTGGAGTAT	0	0	0	1	0	0	2	1	0	7	0	0	0	2	1	0	22	1	3	0	0	0	0	1	1	0	0	204	0	1	0	0
ID180	DNA/hAT-Tip100	Zaphod3	AAATAATGTCAGTAATTAAATACTTTTCCTCTGCAAAACCAA	1	0	0	0	0	0	3	0	0	8	0	0	0	0	1	0	23	0	17	0	0	0	0	0	0	0	0	194	0	2	0	0
ID181	DNA/hAT-Tip100	Zaphod3	AAATATTAAAACCTGACATATATGACAACAAACGTTTAAAAC	0	0	0	0	0	0	0	0	0	8	0	0	0	0	0	0	9	0	9	0	0	0	0	1	0	0	0	227	0	0	0	0
ID182	DNA/hAT-Tip100	Zaphod3	AAATTTGGTTTTGCAGAGGAAAAGTATTTAATTACTGACATT	0	0	0	0	0	0	1	0	0	6	0	0	0	0	1	13	2	0	7	1	0	0	0	1	0	21	0	20	0	1	0	0
ID183	DNA/hAT-Tip100	Zaphod3	AACAGAATTTGGTTTTGCAGAGGAAAAGTATTTAATTACTGA	0	0	0	0	0	0	0	0	0	7	0	0	0	6	0	0	15	0	14	0	0	0	0	0	0	0	0	143	0	1	0	0
ID184	DNA/hAT-Tip100	Zaphod3	AACCAACAGAATTTGGTTTTGCAGAGGAAAAGTATTTAATTA	0	0	0	0	0	0	0	0	0	6	0	0	0	5	0	0	10	0	16	0	0	0	0	0	0	0	0	121	0	1	0	0
ID185	DNA/hAT-Tip100	Zaphod3	AACCAAGTAAACGCTGGTTCTGTTTTGATTACCATCTCCATA	0	0	0	0	0	0	1	0	0	5	0	0	0	3	0	0	6	6	5	0	0	0	0	1	0	0	0	232	0	0	0	0
ID186	DNA/hAT-Tip100	Zaphod3	AACGCTGGTTCTGTTTTGATTACCATCTCCATACTCCAGTAT	0	0	0	0	0	0	14	0	0	3	0	0	0	2	0	1	0	6	5	0	0	0	0	0	0	10	0	30	0	0	0	0
ID187	DNA/hAT-Tip100	Zaphod3	AACGTTTGTTGTCATATATGTCAGGTTTTAATATTTTATATA	0	0	0	0	0	0	0	0	0	9	0	0	0	0	0	0	9	0	8	0	0	0	0	1	0	0	0	218	0	0	0	0
ID188	DNA/hAT-Tip100	Zaphod3	AAGTAAACGCTGGTTCTGTTTTGATTACCATCTCCATACTCC	0	0	0	0	0	0	14	0	0	4	0	0	0	2	0	0	2	7	3	0	0	0	0	0	0	0	0	33	0	0	0	0
ID189	DNA/hAT-Tip100	Zaphod3	AAGTATTTAATTACTGACATTATTTTAGAATACTGGAGTATG	0	0	0	1	0	0	2	1	0	7	1	0	0	3	1	0	23	1	3	0	0	0	0	1	1	0	0	220	0	1	0	0
ID190	DNA/hAT-Tip100	Zaphod3	AATAAAACCAAGTAAACGCTGGTTCTGTTTTGATTACCATCT	0	0	0	0	0	0	0	0	0	6	0	0	2	3	0	0	9	0	4	0	0	0	0	1	0	0	0	248	0	0	0	0
ID191	DNA/hAT-Tip100	Zaphod3	AATAATGTCAGTAATTAAATACTTTTCCTCTGCAAAACCAAA	1	0	0	0	0	0	3	0	0	8	0	0	0	6	1	0	22	0	18	0	0	0	0	1	0	0	0	196	0	2	0	0
ID192	DNA/hAT-Tip100	Zaphod3	AATACTGGAGTATGGAGATGGTAATCAAAACAGAACCAGCGT	0	0	0	0	0	0	14	0	0	3	0	0	0	2	0	1	12	6	5	0	0	0	0	0	0	10	0	148	0	0	0	0
ID193	DNA/hAT-Tip100	Zaphod3	AATATTAAAACCTGACATATATGACAACAAACGTTTAAAACA	0	0	0	0	0	0	0	0	0	7	0	0	0	0	0	0	9	0	3	0	0	0	0	1	0	0	0	199	0	0	0	0
ID194	DNA/hAT-Tip100	Zaphod3	AATGTCAGTAATTAAATACTTTTCCTCTGCAAAACCAAATTC	0	0	0	0	0	0	0	0	0	6	0	0	0	0	0	0	18	0	14	0	0	0	0	0	0	0	0	161	0	1	0	0
ID195	DNA/hAT-Tip100	Zaphod3	AATTACTGACATTATTTTAGAATACTGGAGTATGGAGATGGT	0	0	0	0	0	0	8	0	0	14	1	1	0	0	1	0	19	1	5	0	0	0	0	1	0	0	0	233	0	2	0	0
ID196	DNA/hAT-Tip100	Zaphod3	AATTTGGTTTTGCAGAGGAAAAGTATTTAATTACTGACATTA	0	0	0	0	0	0	2	0	0	12	0	0	0	9	1	11	21	0	21	1	0	0	0	1	0	21	0	183	0	2	0	0
ID197	DNA/hAT-Tip100	Zaphod3	ACAGAATTTGGTTTTGCAGAGGAAAAGTATTTAATTACTGAC	0	0	0	0	0	0	0	0	0	7	0	0	0	6	0	0	15	0	14	0	0	0	0	0	0	0	0	143	0	1	0	0
ID198	DNA/hAT-Tip100	Zaphod3	ACATTATTTTAGAATACTGGAGTATGGAGATGGTAATCAAAA	0	0	0	0	0	0	13	0	0	6	0	0	0	5	0	1	22	6	4	0	0	0	0	1	0	11	0	337	0	2	0	0
ID199	DNA/hAT-Tip100	Zaphod3	ACCAACAGAATTTGGTTTTGCAGAGGAAAAGTATTTAATTAC	0	0	0	0	0	0	0	0	0	6	0	0	0	5	0	0	9	0	16	0	0	0	0	0	0	0	0	118	0	1	0	0
ID200	DNA/hAT-Tip100	Zaphod3	ACGTTTGTTGTCATATATGTCAGGTTTTAATATTTTATATAT	0	0	0	0	0	0	0	0	0	9	0	0	0	0	0	0	9	0	8	0	0	0	0	1	0	0	0	219	0	0	0	0
ID201	DNA/hAT-Tip100	Zaphod3	ACTCCAGTATTCTAAAATAATGTCAGTAATTAAATACTTTTC	0	0	0	1	0	0	2	1	0	7	0	0	0	2	1	0	19	1	3	0	0	0	0	1	1	0	0	192	0	1	0	0
ID202	DNA/hAT-Tip100	Zaphod3	ACTGACATTATTTTAGAATACTGGAGTATGGAGATGGTAATC	0	0	0	0	0	0	12	0	0	9	0	1	0	4	0	1	18	1	4	0	0	0	0	0	0	11	0	210	0	2	0	0
ID203	DNA/hAT-Tip100	Zaphod3	ACTGGAGTATGGAGATGGTAATCAAAACAGAACCAGCGTTTA	0	0	0	0	0	0	14	0	0	3	0	0	0	0	0	0	0	7	5	0	0	0	0	0	0	0	0	30	0	0	0	0
ID204	DNA/hAT-Tip100	Zaphod3	AGAATAAAACCAAGTAAACGCTGGTTCTGTTTTGATTACCAT	0	0	0	0	0	0	0	0	0	5	0	0	2	3	0	0	7	0	9	0	0	0	0	0	0	0	0	116	0	0	0	0
ID205	DNA/hAT-Tip100	Zaphod3	AGAATACTGGAGTATGGAGATGGTAATCAAAACAGAACCAGC	0	0	0	0	1	0	16	0	0	9	1	0	1	2	0	2	13	8	6	0	0	0	0	1	0	10	0	175	0	1	0	0
ID206	DNA/hAT-Tip100	Zaphod3	AGAATTTGGTTTTGCAGAGGAAAAGTATTTAATTACTGACAT	0	0	0	0	0	0	0	0	0	6	0	0	0	6	0	0	17	0	13	0	0	0	0	0	0	0	0	160	0	1	0	0
ID207	DNA/hAT-Tip100	Zaphod3	AGAGGAAAAGTATTTAATTACTGACATTATTTTAGAATACTG	0	0	0	1	0	0	3	1	0	8	0	0	0	5	1	0	20	1	8	0	0	0	0	1	1	0	0	253	0	2	0	0
ID208	DNA/hAT-Tip100	Zaphod3	AGGAAAAGTATTTAATTACTGACATTATTTTAGAATACTGGA	0	0	0	1	0	0	3	1	0	8	0	0	0	5	1	0	19	1	8	0	0	0	0	1	1	0	0	251	0	2	0	0
ID209	DNA/hAT-Tip100	Zaphod3	AGTAAACGCTGGTTCTGTTTTGATTACCATCTCCATACTCCA	0	0	0	0	0	0	14	0	0	4	0	0	0	2	0	0	2	7	3	0	0	0	0	0	0	0	0	33	0	0	0	0
ID210	DNA/hAT-Tip100	Zaphod3	AGTAATTAAATACTTTTCCTCTGCAAAACCAAATTCTGTTGG	0	0	0	0	0	0	0	0	0	7	0	0	0	6	0	0	14	0	15	0	0	0	0	0	0	0	0	144	0	1	0	0
ID211	DNA/hAT-Tip100	Zaphod3	AGTATGGAGATGGTAATCAAAACAGAACCAGCGTTTACTTGG	0	0	0	0	0	0	15	0	0	4	0	0	0	2	0	0	3	6	5	0	0	0	0	0	0	0	0	30	0	1	0	0
ID212	DNA/hAT-Tip100	Zaphod3	AGTATTCTAAAATAATGTCAGTAATTAAATACTTTTCCTCTG	0	0	0	0	0	0	3	0	0	8	0	0	0	5	1	0	20	1	7	0	0	0	0	1	1	0	0	178	0	2	0	0
ID213	DNA/hAT-Tip100	Zaphod3	AGTATTTAATTACTGACATTATTTTAGAATACTGGAGTATGG	0	0	0	1	0	0	2	1	0	7	1	0	0	3	1	0	23	1	3	0	0	0	0	1	0	0	0	203	0	1	0	0
ID214	DNA/hAT-Tip100	Zaphod3	ATAAAACCAAGTAAACGCTGGTTCTGTTTTGATTACCATCTC	0	0	0	0	0	0	0	0	0	6	0	0	2	3	0	0	7	0	4	0	0	0	0	1	0	0	0	241	0	0	0	0
ID215	DNA/hAT-Tip100	Zaphod3	ATAAAATATTAAAACCTGACATATATGACAACAAACGTTTAA	0	0	0	0	0	0	0	0	0	9	0	0	0	1	0	0	9	0	9	0	0	0	0	1	0	0	0	214	0	0	0	0
ID216	DNA/hAT-Tip100	Zaphod3	ATAATGTCAGTAATTAAATACTTTTCCTCTGCAAAACCAAAT	1	0	0	0	0	0	3	0	0	12	0	0	0	9	1	11	21	0	21	1	0	0	0	1	0	21	0	183	0	2	0	0
ID217	DNA/hAT-Tip100	Zaphod3	ATATTAAAACCTGACATATATGACAACAAACGTTTAAAACAG	0	0	0	0	0	0	0	0	0	7	0	0	0	0	0	0	8	0	3	0	0	0	0	1	0	0	0	171	0	0	0	0
ID218	DNA/hAT-Tip100	Zaphod3	ATCTCCATACTCCAGTATTCTAAAATAATGTCAGTAATTAAA	0	0	0	1	0	0	8	1	0	9	1	3	0	3	1	0	20	1	3	0	0	0	0	1	0	0	1	231	0	2	0	0
ID219	DNA/hAT-Tip100	Zaphod3	ATTAAAACCTGACATATATGACAACAAACGTTTAAAACAGAA	0	0	0	0	0	0	0	0	0	7	0	0	0	0	0	0	9	0	3	0	0	0	0	1	0	0	0	170	0	0	0	0
ID220	DNA/hAT-Tip100	Zaphod3	ATTAAATACTTTTCCTCTGCAAAACCAAATTCTGTTGGTTTC	0	0	0	0	0	0	0	0	0	5	0	0	0	4	0	0	9	0	13	0	0	0	0	0	0	0	0	113	0	0	0	0
ID221	DNA/hAT-Tip100	Zaphod3	ATTACCATCTCCATACTCCAGTATTCTAAAATAATGTCAGTA	0	0	0	0	0	0	13	0	0	14	1	1	0	4	1	1	18	1	6	0	0	0	0	0	0	11	0	216	0	2	0	0
ID222	DNA/hAT-Tip100	Zaphod3	ATTACTGACATTATTTTAGAATACTGGAGTATGGAGATGGTA	0	0	0	0	0	0	13	0	0	14	1	1	0	4	1	0	18	1	6	0	0	0	0	1	0	0	0	235	0	2	0	0
ID223	DNA/hAT-Tip100	Zaphod3	ATTATTTTAGAATACTGGAGTATGGAGATGGTAATCAAAACA	0	0	0	0	0	0	16	0	0	10	0	0	0	5	0	1	26	6	8	0	0	0	0	2	0	11	0	422	0	2	0	0
ID224	DNA/hAT-Tip100	Zaphod3	ATTCTAAAATAATGTCAGTAATTAAATACTTTTCCTCTGCAA	0	0	0	0	0	0	3	0	0	8	0	0	0	6	1	0	19	1	7	0	0	0	0	1	1	0	0	188	0	3	0	0
ID225	DNA/hAT-Tip100	Zaphod3	ATTTAATTACTGACATTATTTTAGAATACTGGAGTATGGAGA	0	0	0	1	0	0	8	1	0	7	1	3	0	3	1	0	21	1	3	0	0	0	0	1	0	1	1	235	0	2	0	0
ID226	DNA/hAT-Tip100	Zaphod3	ATTTTAGAATACTGGAGTATGGAGATGGTAATCAAAACAGAA	0	0	0	0	0	0	15	0	0	10	0	0	0	3	0	1	19	7	9	0	0	0	0	2	0	10	0	253	0	2	0	0
ID227	DNA/hAT-Tip100	Zaphod3	CAAAATTTGGTTTTGCAGAGGAAAAGTATTTAATTACTGACA	0	0	0	0	0	0	1	0	0	6	0	0	0	0	1	12	2	0	7	1	0	0	0	1	0	21	0	19	0	1	0	0
ID228	DNA/hAT-Tip100	Zaphod3	CAACAGAATTTGGTTTTGCAGAGGAAAAGTATTTAATTACTG	0	0	0	0	0	0	0	0	0	7	0	0	0	6	0	0	15	0	16	0	0	0	0	0	0	0	0	144	0	1	0	0
ID229	DNA/hAT-Tip100	Zaphod3	CAAGTAAACGCTGGTTCTGTTTTGATTACCATCTCCATACTC	0	0	0	0	0	0	15	0	0	4	0	0	0	2	0	0	3	7	3	0	0	0	0	0	0	0	0	32	0	1	0	0
ID230	DNA/hAT-Tip100	Zaphod3	CAGAATTTGGTTTTGCAGAGGAAAAGTATTTAATTACTGACA	0	0	0	0	0	0	0	0	0	7	0	0	0	6	0	0	17	0	14	0	0	0	0	0	0	0	0	154	0	1	0	0
ID231	DNA/hAT-Tip100	Zaphod3	CATCTCCATACTCCAGTATTCTAAAATAATGTCAGTAATTAA	0	0	0	1	0	0	8	1	0	13	1	1	0	3	1	0	20	1	5	0	0	0	0	1	0	0	0	234	0	2	0	0
ID232	DNA/hAT-Tip100	Zaphod3	CATTATTTTAGAATACTGGAGTATGGAGATGGTAATCAAAAC	0	0	0	0	0	0	16	0	0	10	0	0	0	5	0	1	25	6	8	0	0	0	0	1	0	11	0	337	0	2	0	0
ID233	DNA/hAT-Tip100	Zaphod3	CCAGTATTCTAAAATAATGTCAGTAATTAAATACTTTTCCTC	0	0	0	1	0	0	3	1	0	8	0	0	0	5	1	0	19	1	8	0	0	0	0	1	1	0	0	244	0	2	0	0
ID234	DNA/hAT-Tip100	Zaphod3	CCATCTCCATACTCCAGTATTCTAAAATAATGTCAGTAATTA	0	0	0	0	0	0	8	0	0	13	1	1	0	3	1	0	19	1	5	0	0	0	0	1	0	0	0	231	0	2	0	0
ID235	DNA/hAT-Tip100	Zaphod3	CGCTGGTTCTGTTTTGATTACCATCTCCATACTCCAGTATTC	0	0	0	0	0	0	14	0	0	3	0	0	0	2	0	1	12	6	4	0	0	0	0	0	0	10	0	145	0	0	0	0
ID236	DNA/hAT-Tip100	Zaphod3	CTAAAATAATGTCAGTAATTAAATACTTTTCCTCTGCAAAAC	0	0	0	0	0	0	4	0	0	4	0	0	0	6	1	0	20	1	6	0	0	0	0	1	0	0	0	172	0	2	0	0
ID237	DNA/hAT-Tip100	Zaphod3	CTCCAGTATTCTAAAATAATGTCAGTAATTAAATACTTTTCC	0	0	0	1	0	0	2	1	0	7	0	0	0	2	1	0	19	1	8	0	0	0	0	1	1	0	0	181	0	1	0	0
ID238	DNA/hAT-Tip100	Zaphod3	CTCCATACTCCAGTATTCTAAAATAATGTCAGTAATTAAATA	0	0	0	0	0	0	8	0	0	7	1	3	0	3	1	0	20	1	3	0	0	0	0	1	0	1	1	228	0	2	0	0
ID239	DNA/hAT-Tip100	Zaphod3	CTGACATTATTTTAGAATACTGGAGTATGGAGATGGTAATCA	0	0	0	0	0	0	13	0	0	6	0	1	0	5	0	1	23	6	4	0	0	0	0	1	0	11	0	343	0	2	0	0
ID240	DNA/hAT-Tip100	Zaphod3	CTGGAGTATGGAGATGGTAATCAAAACAGAACCAGCGTTTAC	0	0	0	0	0	0	14	0	0	3	0	0	0	2	0	0	0	7	5	0	0	0	0	0	0	0	0	30	0	0	0	0
ID241	DNA/hAT-Tip100	Zaphod3	CTGGTTCTGTTTTGATTACCATCTCCATACTCCAGTATTCTA	0	0	0	0	0	0	16	0	0	10	0	0	1	2	0	1	15	8	9	0	0	0	0	1	0	10	0	186	0	1	0	0
ID242	DNA/hAT-Tip100	Zaphod3	CTGTTTTGATTACCATCTCCATACTCCAGTATTCTAAAATAA	0	0	0	0	0	0	15	0	0	10	0	0	0	4	0	1	22	7	8	0	0	0	0	2	0	11	0	384	0	2	0	0
ID243	DNA/hAT-Tip100	Zaphod3	GAATAAAACCAAGTAAACGCTGGTTCTGTTTTGATTACCATC	0	0	0	0	0	0	0	0	0	5	0	0	2	3	0	0	7	0	9	0	0	0	0	0	0	0	0	113	0	0	0	0
ID244	DNA/hAT-Tip100	Zaphod3	GACATTATTTTAGAATACTGGAGTATGGAGATGGTAATCAAA	0	0	0	0	0	0	13	0	0	6	0	1	0	0	0	1	23	6	4	0	0	0	0	1	0	11	0	340	0	2	0	0
ID245	DNA/hAT-Tip100	Zaphod3	GCAGAGGAAAAGTATTTAATTACTGACATTATTTTAGAATAC	0	0	0	0	0	0	3	0	0	8	0	0	0	5	1	0	21	1	7	0	0	0	0	1	1	0	0	178	0	2	0	0
ID246	DNA/hAT-Tip100	Zaphod3	GGAGATGGTAATCAAAACAGAACCAGCGTTTACTTGGTTTTA	0	0	0	0	0	0	0	0	0	6	0	0	1	3	0	0	7	0	6	0	0	0	0	1	0	0	0	244	0	0	0	0
ID247	DNA/hAT-Tip100	Zaphod3	GGTTCTGTTTTGATTACCATCTCCATACTCCAGTATTCTAAA	0	0	0	0	0	0	16	0	0	10	0	0	0	3	0	1	19	8	9	0	0	0	0	1	0	10	0	243	0	1	0	0
ID248	DNA/hAT-Tip100	Zaphod3	GGTTTTGCAGAGGAAAAGTATTTAATTACTGACATTATTTTA	0	0	0	0	0	0	3	0	0	6	0	0	0	5	1	0	20	0	14	0	0	0	0	0	0	0	0	172	0	2	0	0
ID249	DNA/hAT-Tip100	Zaphod3	GTATTTAATTACTGACATTATTTTAGAATACTGGAGTATGGA	0	0	0	1	0	0	6	1	0	7	1	1	0	3	1	0	24	1	3	0	0	0	0	1	0	0	0	222	0	1	0	0
ID250	DNA/hAT-Tip100	Zaphod3	GTTCTGTTTTGATTACCATCTCCATACTCCAGTATTCTAAAA	0	0	0	0	0	0	15	0	0	10	0	0	0	3	0	1	19	7	9	0	0	0	0	1	0	10	0	250	0	1	0	0
ID251	DNA/hAT-Tip100	Zaphod3	TAAAATATTAAAACCTGACATATATGACAACAAACGTTTAAA	0	0	0	0	0	0	0	0	0	9	0	0	0	1	0	0	9	0	9	0	0	0	0	1	0	0	0	213	0	0	0	0
ID252	DNA/hAT-Tip100	Zaphod3	TAAACGTTTGTTGTCATATATGTCAGGTTTTAATATTTTATA	0	0	0	0	0	0	0	0	0	9	0	0	0	0	0	0	9	0	8	0	0	0	0	1	0	0	0	215	0	0	0	0
ID253	DNA/hAT-Tip100	Zaphod3	TATTAAAACCTGACATATATGACAACAAACGTTTAAAACAGA	0	0	0	0	0	0	0	0	0	7	0	0	0	0	0	0	8	0	3	0	0	0	0	1	0	0	0	169	0	0	0	0
ID254	DNA/hAT-Tip100	Zaphod3	TATTCTAAAATAATGTCAGTAATTAAATACTTTTCCTCTGCA	0	0	0	0	0	0	3	0	0	8	0	0	0	6	1	0	21	1	7	0	0	0	0	1	1	0	0	187	0	3	0	0
ID255	DNA/hAT-Tip100	Zaphod3	TATTTTAGAATACTGGAGTATGGAGATGGTAATCAAAACAGA	0	0	0	0	0	0	15	0	0	10	0	0	0	4	0	1	24	7	9	0	0	0	0	2	0	11	0	383	0	2	0	0
ID256	DNA/hAT-Tip100	Zaphod3	TCTAAAATAATGTCAGTAATTAAATACTTTTCCTCTGCAAAA	0	0	0	0	0	0	4	0	0	7	0	0	0	0	1	0	19	1	7	0	0	0	0	1	1	0	0	180	0	2	0	0
ID257	DNA/hAT-Tip100	Zaphod3	TGACATTATTTTAGAATACTGGAGTATGGAGATGGTAATCAA	0	0	0	0	0	0	13	0	0	6	0	1	0	0	0	1	25	6	4	0	0	0	0	1	0	11	0	351	0	2	0	0
ID258	DNA/hAT-Tip100	Zaphod3	TGGTTCTGTTTTGATTACCATCTCCATACTCCAGTATTCTAA	0	0	0	0	0	0	16	0	0	10	0	0	1	2	0	1	18	8	9	0	0	0	0	1	0	10	0	245	0	1	0	0
ID259	DNA/hAT-Tip100	Zaphod3	TTAAAACCTGACATATATGACAACAAACGTTTAAAACAGAAA	0	0	0	0	0	0	0	0	0	7	0	0	0	0	0	0	9	0	3	0	0	0	0	1	0	0	0	169	0	0	0	0
ID260	DNA/hAT-Tip100	Zaphod3	TTACCATCTCCATACTCCAGTATTCTAAAATAATGTCAGTAA	0	0	0	0	0	0	13	0	0	14	1	1	0	4	1	0	18	1	6	0	0	0	0	0	0	1	0	232	0	2	0	0
ID261	DNA/hAT-Tip100	Zaphod3	TTCTAAAATAATGTCAGTAATTAAATACTTTTCCTCTGCAAA	0	0	0	0	0	0	3	0	0	7	0	0	0	0	1	0	19	1	7	0	0	0	0	1	1	0	0	184	0	2	0	0
ID262	DNA/TcMar-Tigger	Tigger1	AAGGTGGCTCCACTGAATCAGAGATTTCCAGTGTAGACAAAA	0	0	4	1	1	0	5	1	0	0	0	0	0	0	2	8	0	0	0	0	0	1	0	0	0	6	1	0	1	3	0	0
ID263	DNA/TcMar-Tigger	Tigger1	AATTACCAAAATGTGACACAGAGACATGAAGTGAGCAAATGC	0	4	2	0	0	0	4	0	1	3	5	1	0	4	5	4	5	2	5	0	5	2	4	10	2	3	2	4	4	2	3	3
ID264	DNA/TcMar-Tigger	Tigger1	ACAGCATTTGCTCACTTCATGTCTCTGTGTCACATTTTGGTA	4	5	4	2	5	4	2	1	2	3	3	2	6	5	7	5	5	2	6	1	5	2	2	13	0	5	0	5	4	1	4	2
ID265	DNA/TcMar-Tigger	Tigger1	AGAATTACCAAAATGTGACACAGAGACATGAAGTGAGCAAAT	6	4	2	3	4	3	4	2	1	2	6	3	5	7	6	5	2	1	3	2	3	2	4	10	2	3	3	2	5	4	3	4
ID266	DNA/TcMar-Tigger	Tigger1	AGATGGATATTTTGTCTACACTGGAAATCTCTGATTCAGTGG	3	0	3	2	1	0	5	2	0	0	0	0	0	0	0	8	0	0	0	0	0	0	0	1	0	5	1	0	1	3	0	1
ID267	DNA/TcMar-Tigger	Tigger1	AGCATTTGCTCACTTCATGTCTCTGTGTCACATTTTGGTAAT	3	5	3	2	4	3	4	1	1	4	3	1	7	3	5	4	5	2	6	0	5	2	3	10	1	4	2	4	5	2	3	3
ID268	DNA/TcMar-Tigger	Tigger1	AGGTGGCTCCACTGAATCAGAGATTTCCAGTGTAGACAAAAT	3	0	4	1	1	0	5	1	0	0	0	0	0	0	2	8	0	0	0	0	0	1	0	0	0	5	1	0	1	3	0	0
ID269	DNA/TcMar-Tigger	Tigger1	ATATTTTGTCTACACTGGAAATCTCTGATTCAGTGGAGCCAC	0	0	4	0	0	0	5	0	0	0	0	0	0	0	2	8	0	0	0	0	0	1	0	0	0	5	1	0	1	3	0	1
ID270	DNA/TcMar-Tigger	Tigger1	ATGGATATTTTGTCTACACTGGAAATCTCTGATTCAGTGGAG	3	0	3	2	1	0	5	2	0	0	0	0	0	0	0	8	0	0	0	0	0	0	0	0	0	5	1	0	1	3	0	1
ID271	DNA/TcMar-Tigger	Tigger1	ATTATATTTGTTATGGTGATCTGTGATCAGTGATCTTTGATG	2	2	4	5	2	2	1	4	0	2	0	5	2	4	5	4	1	1	4	4	3	4	5	6	10	2	3	2	2	4	6	2
ID272	DNA/TcMar-Tigger	Tigger1	CACTGAATCAGAGATTTCCAGTGTAGACAAAATATCCATCTA	0	0	3	1	1	0	5	0	0	0	0	0	0	0	0	8	0	0	0	0	0	0	0	1	0	5	1	0	1	3	0	1
ID273	DNA/TcMar-Tigger	Tigger1	CAGCATTTGCTCACTTCATGTCTCTGTGTCACATTTTGGTAA	3	5	4	2	4	3	2	1	1	3	2	2	5	2	5	4	5	2	6	0	5	2	1	10	0	4	0	4	4	1	3	2
ID274	DNA/TcMar-Tigger	Tigger1	CATTTGCTCACTTCATGTCTCTGTGTCACATTTTGGTAATTC	5	1	1	3	2	2	3	2	1	2	5	1	4	0	6	2	2	1	4	1	3	2	4	10	2	1	3	2	3	3	3	3
ID275	DNA/TcMar-Tigger	Tigger1	GAAGGTGGCTCCACTGAATCAGAGATTTCCAGTGTAGACAAA	3	0	4	1	1	0	5	1	0	0	0	0	0	0	2	8	0	0	0	0	0	1	0	0	0	6	1	0	1	3	0	0
ID276	DNA/TcMar-Tigger	Tigger1	GATATTTTGTCTACACTGGAAATCTCTGATTCAGTGGAGCCA	0	0	3	1	1	0	5	1	0	0	0	0	0	0	2	8	0	0	0	0	0	1	0	0	0	5	1	0	1	3	0	1
ID277	DNA/TcMar-Tigger	Tigger1	GATGGATATTTTGTCTACACTGGAAATCTCTGATTCAGTGGA	3	0	3	2	1	0	5	2	0	0	0	0	0	0	0	8	0	0	0	0	0	0	0	0	0	5	1	0	1	3	0	1
ID278	DNA/TcMar-Tigger	Tigger1	GCTCCACTGAATCAGAGATTTCCAGTGTAGACAAAATATCCA	3	0	3	1	1	0	5	1	0	0	0	0	0	0	0	8	0	0	0	0	0	0	0	0	0	5	1	0	1	3	0	1
ID279	DNA/TcMar-Tigger	Tigger1	GGATATTTTGTCTACACTGGAAATCTCTGATTCAGTGGAGCC	3	0	3	1	1	0	5	1	0	0	0	0	0	0	2	8	0	0	0	0	0	1	0	0	0	5	1	0	1	3	0	1
ID280	DNA/TcMar-Tigger	Tigger1	GGTGGCTCCACTGAATCAGAGATTTCCAGTGTAGACAAAATA	3	0	4	1	1	0	5	1	0	0	0	0	0	0	2	8	0	0	0	0	0	1	0	0	0	5	1	0	1	3	0	0
ID281	DNA/TcMar-Tigger	Tigger1	TGTCTCTGTGTCACATTTTGGTAATTCTTGCAATATTTCAAA	0	0	0	3	0	5	3	0	0	4	3	2	2	6	7	0	3	2	3	0	1	2	3	7	5	0	3	3	2	2	2	3
ID282	LINE/L1	HAL1	AGATAAATGGATATATTTAATCTGCCATATTCAACCTGAAAT	2	0	0	0	3	3	9	0	0	0	0	2	0	1	5	0	0	2	0	0	0	2	1	1	0	0	2	0	2	6	0	0
ID283	LINE/L1	HAL1	GAGATAAATGGATATATTTAATCTGCCATATTCAACCTGAAA	2	0	0	0	3	3	9	0	0	0	0	2	0	1	5	0	0	2	0	0	0	2	1	1	0	0	2	0	2	6	0	0
ID284	LINE/L1	HAL1ME	AAAAAATAAAAGATAATTACAATTGCAAGCCATAATGGGAAC	6	10	6	15	8	10	8	20	13	10	7	11	7	7	15	5	4	7	15	1	8	3	13	18	7	8	5	3	6	9	10	9
ID285	LINE/L1	HAL1ME	AAAAATAAAAGATAATTACAATTGCAAGCCATAATGGGAACA	0	10	6	15	8	11	11	18	16	10	9	10	7	8	17	6	4	9	15	1	10	3	18	21	7	8	5	3	5	12	13	12
ID286	LINE/L1	HAL1ME	AAAACTGATAAACATCTTTTACTATTGTGATTATGTAACTAT	0	16	24	0	0	0	25	0	24	28	24	31	0	0	34	28	14	22	26	11	16	12	20	34	17	21	17	18	22	25	23	30
ID287	LINE/L1	HAL1ME	AAAAGATAATTACAATTGCAAGCCATAATGGGAACATGATTA	18	15	13	27	10	15	17	28	25	10	7	14	10	4	16	18	5	15	17	4	14	5	28	22	10	12	8	5	7	18	26	19
ID288	LINE/L1	HAL1ME	AAAAGATGTTTATCAGTTTTCACAATCAATAGCCAGACAAAA	0	20	26	0	0	0	38	0	29	27	29	18	0	18	26	27	19	27	26	11	18	15	31	30	24	14	21	20	26	30	23	24
ID289	LINE/L1	HAL1ME	AAAATAAAAGATAATTACAATTGCAAGCCATAATGGGAACAT	11	8	5	17	7	11	10	21	15	10	8	10	7	8	14	4	4	9	15	1	9	3	20	20	7	6	5	2	4	12	14	11
ID290	LINE/L1	HAL1ME	AAACATCTTTTACTATTGTGATTATGTAACTATTACTCACTT	7	16	15	6	15	9	14	10	12	21	18	16	14	12	23	16	8	15	22	7	12	7	10	27	13	18	19	10	16	12	13	19
ID291	LINE/L1	HAL1ME	AAACTGATAAACATCTTTTACTATTGTGATTATGTAACTATT	27	17	26	12	20	16	27	27	23	29	24	32	16	0	36	27	16	21	28	12	18	13	20	34	16	23	18	20	23	24	24	31
ID292	LINE/L1	HAL1ME	AAAGATAATTACAATTGCAAGCCATAATGGGAACATGATTAA	0	15	14	0	0	16	17	0	25	11	7	14	0	3	19	19	4	14	18	4	14	5	27	20	11	13	8	5	8	17	26	20
ID293	LINE/L1	HAL1ME	AAAGATGTTTATCAGTTTTCACAATCAATAGCCAGACAAAAA	44	25	32	33	34	31	43	43	36	33	31	28	36	0	32	33	20	30	33	13	23	16	37	39	30	18	21	23	33	34	26	31
ID294	LINE/L1	HAL1ME	AAATAAAAGATAATTACAATTGCAAGCCATAATGGGAACATG	13	9	4	15	8	11	12	20	15	9	8	11	7	8	15	5	5	10	16	1	10	4	20	21	8	7	5	3	5	13	13	13
ID295	LINE/L1	HAL1ME	AAATTGTATGTAATTATTTTATATTGTTAGGTTAATCATGTT	0	22	22	24	20	37	26	25	24	14	21	17	26	0	28	27	18	15	22	7	17	17	27	21	13	24	15	21	19	16	21	25
ID296	LINE/L1	HAL1ME	AACATCTTTTACTATTGTGATTATGTAACTATTACTCACTTA	0	15	18	6	13	10	14	11	14	19	16	16	13	11	24	16	8	15	20	7	13	7	11	29	13	18	17	11	18	12	15	19
ID297	LINE/L1	HAL1ME	AACTATTACTCACTTAATACCATTGTATCATGATTGGTCAAC	0	14	11	8	11	11	10	10	5	9	8	17	9	7	20	10	6	11	7	0	6	10	8	17	9	13	8	8	12	10	5	11
ID298	LINE/L1	HAL1ME	AACTGATAAACATCTTTTACTATTGTGATTATGTAACTATTA	0	19	24	0	0	17	25	0	23	29	27	31	0	0	37	26	17	20	29	11	18	14	22	34	15	23	19	20	24	23	27	30
ID299	LINE/L1	HAL1ME	AAGATAATTACAATTGCAAGCCATAATGGGAACATGATTAAC	16	14	14	23	8	15	15	24	23	11	7	13	6	3	16	20	5	13	16	4	13	4	25	17	12	13	8	6	8	16	22	18
ID300	LINE/L1	HAL1ME	AAGATGTTTATCAGTTTTCACAATCAATAGCCAGACAAAAAA	39	21	27	29	28	25	41	36	29	29	32	23	36	22	31	24	18	26	29	12	23	20	35	37	28	18	18	19	28	30	25	30
ID301	LINE/L1	HAL1ME	AAGCCATAATGGGAACATGATTAACCTAACAATATAAAATAA	0	12	12	0	0	14	21	0	13	9	15	18	0	8	23	10	5	12	14	6	9	11	18	18	18	13	11	8	10	13	18	22
ID302	LINE/L1	HAL1ME	AAGCCATAATGGGAACATGATTAACTTAACAATATAAAATAA	10	7	8	19	5	14	10	14	15	10	9	15	13	0	11	10	6	10	12	4	8	8	22	12	17	6	7	6	10	13	20	15
ID303	LINE/L1	HAL1ME	AATAAAAGATAATTACAATTGCAAGCCATAATGGGAACATGA	13	9	5	16	8	11	14	19	14	7	8	11	7	7	15	5	5	9	14	1	10	3	18	20	8	7	5	3	5	15	13	14
ID304	LINE/L1	HAL1ME	AATACCATTGTATCATGATTGGTCAACAGAAAAATAATAGAA	17	9	13	20	26	17	11	24	14	12	16	16	20	13	27	14	10	14	15	0	11	12	24	28	14	9	13	12	17	18	6	15
ID305	LINE/L1	HAL1ME	AATAGCCAGACAAAAAATAAAAGATAATTACAATTGCAAGCC	13	8	10	12	10	13	13	18	12	9	19	8	8	4	16	4	6	10	14	2	5	4	19	16	7	6	8	4	8	9	18	9
ID306	LINE/L1	HAL1ME	AATAGTAAAAGATGTTTATCAGTTTTCACAATCAATAGCCAG	0	25	22	0	0	25	30	0	24	23	23	19	0	15	35	27	15	26	23	9	18	13	32	31	24	17	22	16	30	32	26	32
ID307	LINE/L1	HAL1ME	AATCAATAGCCAGACAAAAAATAAAAGATAATTACAATTGCA	13	7	8	13	9	12	15	19	14	6	16	11	12	5	21	7	7	10	14	2	6	2	18	18	12	6	9	7	8	11	16	10
ID308	LINE/L1	HAL1ME	AATCACAATAGTAAAAGATGTTTATCAGTTTTCACAATCAAT	40	23	26	34	23	26	30	41	23	31	25	22	31	20	43	25	9	28	28	9	21	12	37	37	23	22	21	12	29	32	27	33
ID309	LINE/L1	HAL1ME	AATCATGATACAATGGTATTAAGTGAGTAATAGTTACATAAT	10	12	11	5	8	13	10	13	9	11	5	11	9	8	18	10	4	13	10	1	12	10	6	18	10	13	8	6	11	7	9	12
ID310	LINE/L1	HAL1ME	AATCATGTTCCCATTATGGCTTGCAATTGTAATTATCTTTTA	14	10	8	21	7	12	14	23	18	8	10	11	9	3	14	12	5	12	15	2	12	4	21	17	8	8	6	3	6	14	21	16
ID311	LINE/L1	HAL1ME	AATGGGAACATGATTAACCTAACAATATAAAATAATTACATA	18	13	9	17	8	16	19	20	15	8	9	15	12	10	21	13	6	8	14	6	11	11	17	14	9	14	10	7	10	12	22	17
ID312	LINE/L1	HAL1ME	AATGGTATTAAGTGAGTAATAGTTACATAATCACAATAGTAA	11	8	12	7	11	11	13	9	14	16	7	13	9	10	19	12	5	9	15	2	10	6	11	21	9	13	11	4	12	8	6	14
ID313	LINE/L1	HAL1ME	AATTACAATTGCAAGCCATAATGGGAACATGATTAACCTAAC	11	5	6	11	3	9	13	12	6	8	4	2	3	3	15	6	1	7	11	1	7	2	8	13	5	6	4	3	3	7	11	13
ID314	LINE/L1	HAL1ME	AATTATCTTTTATTTTTTGTCTGGCTATTGATTGTGAAAACT	24	16	15	26	14	23	19	32	23	16	25	24	18	17	36	13	10	12	21	5	16	15	32	35	21	16	19	10	20	17	21	18
ID315	LINE/L1	HAL1ME	AATTATTTTATATTGTTAGGTTAATCATGTTCCCATTATGGC	0	12	10	0	0	0	18	0	15	8	0	19	0	11	24	9	6	11	12	5	9	11	16	18	15	12	9	8	10	12	17	19
ID316	LINE/L1	HAL1ME	AATTGCAAGCCATAATGGGAACATGATTAACCTAACAATATA	0	4	9	0	0	0	15	0	9	9	0	11	0	6	16	6	2	7	11	2	5	3	7	13	11	6	6	5	6	10	9	18
ID317	LINE/L1	HAL1ME	AATTGCAAGCCATAATGGGAACATGATTAACTTAACAATATA	14	10	4	15	4	16	8	11	13	7	9	7	11	6	8	8	3	9	9	2	7	5	15	11	10	9	7	4	9	9	14	9
ID318	LINE/L1	HAL1ME	AATTGTAATTATCTTTTATTTTTTGTCTGGCTATTGATTGTG	10	9	4	11	10	11	12	16	14	5	13	13	11	4	18	6	6	13	11	2	7	4	17	16	14	5	9	7	10	12	14	8
ID319	LINE/L1	HAL1ME	AATTGTATGTAATTATTTTATATTGTTAGGTTAATCATGTTC	0	10	7	0	0	16	15	0	10	7	8	10	0	11	15	9	6	7	12	3	10	7	10	10	5	12	5	8	8	8	10	15
ID320	LINE/L1	HAL1ME	ACAAAAAATAAAAGATAATTACAATTGCAAGCCATAATGGGA	5	10	7	14	8	13	7	19	13	11	9	10	7	0	15	7	6	5	16	1	7	3	12	18	9	8	5	4	6	8	11	6
ID321	LINE/L1	HAL1ME	ACAATAGTAAAAGATGTTTATCAGTTTTCACAATCAATAGCC	39	23	23	28	24	22	23	29	23	24	22	18	28	18	33	29	13	24	21	9	19	15	30	26	20	18	17	14	30	30	26	28
ID322	LINE/L1	HAL1ME	ACAATCAATAGCCAGACAAAAAATAAAAGATAATTACAATTG	0	11	8	12	12	11	13	16	13	6	17	14	12	5	19	8	6	13	12	2	9	3	16	16	12	9	11	7	11	12	14	9
ID323	LINE/L1	HAL1ME	ACAATGGTATTAAGTGAGTAATAGTTACATAATCACAATAGT	11	7	9	8	10	8	13	8	11	18	4	14	10	0	18	11	4	10	16	2	10	4	9	17	9	11	8	2	10	8	6	13
ID324	LINE/L1	HAL1ME	ACAATTGCAAGCCATAATGGGAACATGATTAACCTAACAATA	7	4	8	9	3	12	18	10	4	6	8	8	4	6	16	7	3	8	11	3	6	4	6	15	8	5	5	4	6	7	10	20
ID325	LINE/L1	HAL1ME	ACATAATCACAATAGTAAAAGATGTTTATCAGTTTTCACAAT	31	25	20	16	20	20	29	39	24	26	23	30	25	0	37	25	7	26	24	13	13	9	39	31	19	23	15	11	25	27	26	35
ID326	LINE/L1	HAL1ME	ACATCTTTTACTATTGTGATTATGTAACTATTACTCACTTAA	0	13	18	0	0	0	13	0	14	18	0	15	0	11	25	15	8	14	19	6	13	7	12	29	13	17	16	11	16	11	15	18
ID327	LINE/L1	HAL1ME	ACATGATTAACCTAACAATATAAAATAATTACATACAATTTG	23	19	21	24	19	30	24	25	21	12	20	15	21	0	27	25	18	14	18	7	12	16	26	21	12	21	13	20	15	16	23	22
ID328	LINE/L1	HAL1ME	ACCAATCATGATACAATGGTATTAAGTGAGTAATAGTTACAT	9	12	10	4	5	11	9	8	4	10	7	11	7	7	22	9	4	9	8	0	8	9	4	18	9	10	8	6	11	6	5	11
ID329	LINE/L1	HAL1ME	ACCCCCCAAATTGTATGTAATTATTTTATATTGTTAGGTTAA	9	8	8	18	2	6	8	11	9	2	3	5	6	5	11	8	3	5	5	3	3	0	13	14	5	6	6	3	4	8	9	8
ID330	LINE/L1	HAL1ME	ACTATTACTCACTTAATACCATTGTATCATGATTGGTCAACA	13	15	12	11	12	12	9	12	6	10	8	17	12	7	20	11	6	12	8	0	7	10	12	17	8	13	8	8	13	10	6	11
ID331	LINE/L1	HAL1ME	ACTCACTTAATACCATTGTATCATGATTGGTCAACAGAAAAA	0	16	21	0	0	17	19	0	9	15	16	19	0	14	24	18	7	16	17	0	10	14	21	27	13	20	12	12	17	20	8	19
ID332	LINE/L1	HAL1ME	ACTGATAAACATCTTTTACTATTGTGATTATGTAACTATTAC	18	15	16	7	13	11	15	16	17	24	16	21	9	13	28	18	11	15	25	7	14	8	18	23	10	18	14	11	16	15	19	20
ID333	LINE/L1	HAL1ME	ACTTAATACCATTGTATCATGATTGGTCAACAGAAAAATAAT	0	11	14	0	0	0	12	0	13	0	0	17	0	15	25	15	0	14	13	0	9	12	23	24	13	12	11	12	14	16	7	14
ID334	LINE/L1	HAL1ME	AGACAAAAAATAAAAGATAATTACAATTGCAAGCCATAATGG	12	12	9	17	8	16	11	24	15	14	15	12	9	6	17	8	6	10	23	1	8	5	18	21	12	11	8	4	9	13	17	8
ID335	LINE/L1	HAL1ME	AGATAATTACAATTGCAAGCCATAATGGGAACATGATTAACC	9	6	6	11	5	7	10	12	12	6	2	4	2	3	10	8	1	8	9	2	7	1	11	9	6	7	3	4	1	9	11	10
ID336	LINE/L1	HAL1ME	AGATGTTTATCAGTTTTCACAATCAATAGCCAGACAAAAAAT	28	16	17	26	15	18	31	33	28	18	23	19	23	16	27	15	12	21	22	7	19	17	31	30	20	13	12	13	19	21	22	23
ID337	LINE/L1	HAL1ME	AGCCAGACAAAAAATAAAAGATAATTACAATTGCAAGCCATA	16	11	12	13	11	18	13	22	18	10	19	8	11	4	19	4	4	12	17	2	9	6	22	20	9	7	8	3	9	11	20	10
ID338	LINE/L1	HAL1ME	AGCCATAATGGGAACATGATTAACCTAACAATATAAAATAAT	0	12	12	18	5	14	20	24	14	8	14	18	7	8	23	10	5	14	12	6	10	11	17	18	16	13	11	7	11	14	18	21
ID339	LINE/L1	HAL1ME	AGGTTAATCATGTTCCCATTATGGCTTGCAATTGTAATTATC	10	6	6	12	5	8	11	13	12	7	3	4	2	3	11	8	1	8	10	2	7	1	11	10	6	7	3	4	1	9	12	11
ID340	LINE/L1	HAL1ME	AGTAAAAGATGTTTATCAGTTTTCACAATCAATAGCCAGACA	40	20	23	30	23	27	33	37	28	27	26	20	30	18	32	23	18	27	26	10	16	18	29	33	23	13	24	22	30	30	24	26
ID341	LINE/L1	HAL1ME	AGTAATAGTTACATAATCACAATAGTAAAAGATGTTTATCAG	18	15	16	7	13	12	15	16	15	22	14	21	10	11	26	18	11	16	24	7	14	8	16	23	10	18	14	11	15	15	17	22
ID342	LINE/L1	HAL1ME	AGTGAGTAATAGTTACATAATCACAATAGTAAAAGATGTTTA	0	15	13	0	0	0	15	0	12	20	0	16	0	11	22	16	8	16	22	8	13	8	10	23	14	17	19	10	15	11	13	20
ID343	LINE/L1	HAL1ME	AGTTACATAATCACAATAGTAAAAGATGTTTATCAGTTTTCA	33	23	25	11	23	21	32	34	22	29	27	37	22	18	41	30	10	26	29	12	22	11	33	37	22	26	19	15	28	30	25	35
ID344	LINE/L1	HAL1ME	ATAAAAGATAATTACAATTGCAAGCCATAATGGGAACATGAT	0	9	7	0	0	0	14	0	14	8	0	10	0	0	14	8	5	10	15	2	9	4	18	17	7	7	5	4	5	13	13	14
ID345	LINE/L1	HAL1ME	ATAAACATCTTTTACTATTGTGATTATGTAACTATTACTCAC	10	15	13	5	15	10	13	11	11	21	18	17	13	0	22	14	9	15	22	7	14	8	10	24	15	16	18	11	15	12	14	19
ID346	LINE/L1	HAL1ME	ATAATCACAATAGTAAAAGATGTTTATCAGTTTTCACAATCA	40	26	27	34	23	28	31	43	29	29	30	32	32	0	43	29	9	31	32	14	20	15	41	34	23	27	21	13	31	31	29	35
ID347	LINE/L1	HAL1ME	ATAATGGGAACATGATTAACCTAACAATATAAAATAATTACA	15	13	7	18	8	17	22	23	17	11	13	16	11	12	21	10	9	15	16	4	12	12	18	17	13	15	12	11	13	12	22	22
ID348	LINE/L1	HAL1ME	ATAATTACAATTGCAAGCCATAATGGGAACATGATTAACCTA	11	6	6	12	5	8	12	13	11	8	3	3	3	3	13	7	1	8	12	1	7	1	11	11	7	7	5	4	1	8	12	12
ID349	LINE/L1	HAL1ME	ATACAATGGTATTAAGTGAGTAATAGTTACATAATCACAATA	0	7	12	6	11	12	11	9	9	17	3	14	9	8	19	14	5	10	15	2	11	5	9	18	9	11	7	3	13	8	7	13
ID350	LINE/L1	HAL1ME	ATAGCCAGACAAAAAATAAAAGATAATTACAATTGCAAGCCA	13	9	11	12	11	15	12	19	14	9	19	8	8	4	18	4	6	10	16	2	6	4	18	18	7	6	7	4	8	9	16	10
ID351	LINE/L1	HAL1ME	ATAGTAAAAGATGTTTATCAGTTTTCACAATCAATAGCCAGA	42	25	26	32	29	27	30	36	25	24	26	20	27	17	34	28	17	25	24	12	20	14	32	31	23	17	23	19	31	33	27	29
ID352	LINE/L1	HAL1ME	ATATTGTTAGGTTAATCATGTTCCCATTATGGCTTGCAATTG	6	4	8	7	3	14	17	12	6	7	11	8	5	6	16	7	3	9	14	3	5	6	7	14	11	5	5	6	5	7	8	20
ID353	LINE/L1	HAL1ME	ATCAATAGCCAGACAAAAAATAAAAGATAATTACAATTGCAA	10	6	7	14	8	11	13	19	14	6	17	9	11	6	19	3	7	9	12	1	6	3	19	16	12	5	8	7	7	10	15	9
ID354	LINE/L1	HAL1ME	ATCACAATAGTAAAAGATGTTTATCAGTTTTCACAATCAATA	0	23	26	0	0	26	28	0	23	29	24	19	0	0	43	25	10	27	23	9	20	12	36	37	24	21	22	13	27	31	27	30
ID355	LINE/L1	HAL1ME	ATCAGTTTTCACAATCAATAGCCAGACAAAAAATAAAAGATA	19	12	13	22	12	18	16	26	25	15	20	28	16	16	34	10	11	13	21	4	18	15	30	32	22	13	11	10	18	15	21	16
ID356	LINE/L1	HAL1ME	ATCATGATACAATGGTATTAAGTGAGTAATAGTTACATAATC	10	13	11	5	9	13	11	13	9	10	5	14	8	8	19	10	4	11	10	3	12	8	6	18	10	14	8	6	12	8	8	12
ID357	LINE/L1	HAL1ME	ATCTTTTACTATTGTGATTATGTAACTATTACTCACTTAATA	13	12	14	5	13	13	17	11	15	18	16	15	8	11	22	14	7	10	17	5	11	7	12	28	15	14	14	11	15	11	14	21
ID358	LINE/L1	HAL1ME	ATCTTTTATTTTTTGTCTGGCTATTGATTGTGAAAACTGATA	22	13	15	22	14	21	17	26	26	19	21	26	19	18	34	12	13	14	28	6	17	14	30	32	20	14	14	13	18	17	21	17
ID359	LINE/L1	HAL1ME	ATGATACAATGGTATTAAGTGAGTAATAGTTACATAATCACA	0	13	13	6	8	19	10	10	11	18	8	18	12	11	20	15	5	12	14	3	13	8	8	16	11	13	8	4	12	8	8	11
ID360	LINE/L1	HAL1ME	ATGATTAACCTAACAATATAAAATAATTACATACAATTTGGG	16	13	13	19	9	19	21	15	13	11	11	11	16	14	17	16	12	13	14	5	10	9	18	14	10	12	12	9	11	13	17	18
ID361	LINE/L1	HAL1ME	ATGGCTTGCAATTGTAATTATCTTTTATTTTTTGTCTGGCTA	14	9	11	11	10	16	12	20	17	9	20	8	9	4	19	3	6	12	16	2	7	4	19	20	7	6	8	4	8	10	17	10
ID362	LINE/L1	HAL1ME	ATGGGAACATGATTAACCTAACAATATAAAATAATTACATAC	16	11	8	15	7	14	17	17	11	7	9	12	10	11	19	12	5	6	14	5	10	9	15	13	9	13	6	6	8	10	19	14
ID363	LINE/L1	HAL1ME	ATGGTATTAAGTGAGTAATAGTTACATAATCACAATAGTAAA	11	8	11	7	11	12	14	9	13	15	8	12	9	10	20	12	4	10	15	2	11	6	11	21	9	13	11	5	12	9	6	16
ID364	LINE/L1	HAL1ME	ATGTAATTATTTTATATTGTTAGGTTAATCATGTTCCCATTA	0	12	7	17	8	18	19	21	15	8	10	14	10	9	18	10	7	13	13	4	10	10	16	13	12	13	9	8	12	12	21	18
ID365	LINE/L1	HAL1ME	ATGTTTATCAGTTTTCACAATCAATAGCCAGACAAAAAATAA	0	13	15	29	12	21	30	34	30	20	27	23	25	18	30	12	12	19	24	6	18	17	28	33	19	12	15	16	20	24	21	21
ID366	LINE/L1	HAL1ME	ATTAACCTAACAATATAAAATAATTACATACAATTTGGGGGG	11	8	9	20	2	10	10	13	12	4	4	4	9	7	15	9	5	5	5	4	3	4	14	12	6	6	5	5	6	9	11	11
ID367	LINE/L1	HAL1ME	ATTAAGTGAGTAATAGTTACATAATCACAATAGTAAAAGATG	9	12	15	6	14	12	13	10	15	17	17	15	7	12	23	15	9	11	19	6	11	7	13	27	14	14	15	12	16	9	14	18
ID368	LINE/L1	HAL1ME	ATTACAATTGCAAGCCATAATGGGAACATGATTAACCTAACA	11	5	7	12	3	9	17	12	7	7	5	6	4	3	18	6	2	8	9	1	6	2	8	15	7	6	5	2	4	9	12	18
ID369	LINE/L1	HAL1ME	ATTACTCACTTAATACCATTGTATCATGATTGGTCAACAGAA	20	13	14	14	26	13	16	13	5	13	14	20	16	8	21	11	6	15	13	0	10	11	16	23	11	15	9	10	13	15	7	16
ID370	LINE/L1	HAL1ME	ATTATCTTTTATTTTTTGTCTGGCTATTGATTGTGAAAACTG	22	15	15	24	14	24	18	29	23	14	21	26	17	18	35	12	11	11	20	4	16	15	30	32	21	15	16	11	19	16	20	17
ID371	LINE/L1	HAL1ME	ATTATGGCTTGCAATTGTAATTATCTTTTATTTTTTGTCTGG	0	10	7	0	0	0	10	0	17	0	0	9	0	4	20	5	0	11	22	1	8	6	20	24	10	7	9	5	8	11	18	7
ID372	LINE/L1	HAL1ME	ATTGCAAGCCATAATGGGAACATGATTAACCTAACAATATAA	10	6	10	10	4	15	16	13	8	9	12	11	6	6	16	7	4	7	11	2	7	3	7	13	12	8	9	6	6	11	9	19
ID373	LINE/L1	HAL1ME	ATTGCAAGCCATAATGGGAACATGATTAACTTAACAATATAA	14	11	4	15	4	16	8	11	12	7	9	7	11	6	8	9	4	9	9	2	8	5	14	11	10	10	7	5	10	9	13	10
ID374	LINE/L1	HAL1ME	ATTGTAATTATCTTTTATTTTTTGTCTGGCTATTGATTGTGA	0	10	5	0	0	0	11	0	13	6	0	14	0	4	17	8	6	14	13	3	7	4	18	15	12	6	9	7	11	11	15	9
ID375	LINE/L1	HAL1ME	ATTGTATGTAATTATTTTATATTGTTAGGTTAATCATGTTCC	17	10	7	11	6	17	18	13	10	7	9	10	9	10	15	10	5	7	13	3	9	6	13	11	6	12	6	6	8	10	14	17
ID376	LINE/L1	HAL1ME	ATTGTGATTATGTAACTATTACTCACTTAATACCATTGTATC	0	7	11	5	8	12	9	9	7	15	3	13	8	8	18	12	5	10	13	2	10	3	8	16	8	10	7	4	13	7	5	11
ID377	LINE/L1	HAL1ME	ATTGTTAAGTTAATCATGTTCCCATTATGGCTTGCAATTGTA	12	12	6	13	4	13	7	9	10	6	9	10	7	3	8	9	3	8	7	2	6	3	12	11	5	11	8	3	10	8	10	8
ID378	LINE/L1	HAL1ME	ATTGTTAGGTTAATCATGTTCCCATTATGGCTTGCAATTGTA	6	4	7	10	3	9	16	11	6	6	7	7	3	5	15	6	2	7	11	2	6	3	5	15	8	5	5	3	6	7	10	18
ID379	LINE/L1	HAL1ME	ATTTTATATTGTTAAGTTAATCATGTTCCCATTATGGCTTGC	0	10	7	15	6	15	9	12	14	9	10	11	12	5	9	9	3	10	10	4	8	4	15	10	12	10	9	3	10	11	17	13
ID380	LINE/L1	HAL1ME	ATTTTATATTGTTAGGTTAATCATGTTCCCATTATGGCTTGC	0	10	11	15	6	13	17	19	12	10	14	14	8	7	21	10	5	9	13	5	8	8	14	19	15	10	10	8	8	11	15	20
ID381	LINE/L1	HAL1ME	ATTTTTCTGTTGACCAATCATGATACAATGGTATTAAGTGAG	20	14	17	18	29	16	17	18	10	14	16	19	22	14	24	15	7	14	18	0	12	12	20	29	13	15	11	12	16	20	9	16
ID382	LINE/L1	HAL1ME	CAAAAAATAAAAGATAATTACAATTGCAAGCCATAATGGGAA	5	11	7	14	9	13	6	20	12	11	6	9	8	6	15	7	5	6	16	1	7	3	13	17	7	9	5	4	6	8	10	8
ID383	LINE/L1	HAL1ME	CAAGCCATAATGGGAACATGATTAACCTAACAATATAAAATA	12	11	11	15	6	13	19	21	12	10	15	16	7	8	22	9	6	10	13	5	8	10	15	18	17	11	11	9	9	13	16	22
ID384	LINE/L1	HAL1ME	CAAGCCATAATGGGAACATGATTAACTTAACAATATAAAATA	11	10	8	19	5	16	11	14	16	9	11	15	13	6	10	11	5	10	11	4	8	4	20	13	18	8	9	4	10	13	22	15
ID385	LINE/L1	HAL1ME	CAATAGCCAGACAAAAAATAAAAGATAATTACAATTGCAAGC	12	8	9	10	9	12	13	14	12	10	18	8	8	6	15	4	7	8	13	2	6	4	16	14	7	6	9	6	8	9	13	8
ID386	LINE/L1	HAL1ME	CAATAGTAAAAGATGTTTATCAGTTTTCACAATCAATAGCCA	37	23	23	28	26	22	26	31	21	24	21	18	28	19	34	30	15	26	23	9	20	15	31	29	22	17	18	15	29	32	26	30
ID387	LINE/L1	HAL1ME	CAATCAATAGCCAGACAAAAAATAAAAGATAATTACAATTGC	13	7	7	12	9	11	13	17	12	6	15	10	11	4	18	7	5	9	13	2	6	3	17	15	12	6	8	6	8	11	14	9
ID388	LINE/L1	HAL1ME	CAATCATGATACAATGGTATTAAGTGAGTAATAGTTACATAA	10	12	11	5	6	12	9	12	7	11	5	11	7	7	18	9	3	10	10	0	12	10	5	17	11	11	8	5	11	6	7	12
ID389	LINE/L1	HAL1ME	CAATGGTATTAAGTGAGTAATAGTTACATAATCACAATAGTA	10	8	11	7	12	9	13	7	12	16	4	13	9	7	18	12	4	11	15	2	8	4	9	18	9	13	9	3	10	8	5	14
ID390	LINE/L1	HAL1ME	CACAATAGTAAAAGATGTTTATCAGTTTTCACAATCAATAGC	0	25	26	29	0	24	27	0	25	29	25	19	30	19	37	28	11	25	22	10	20	12	31	28	19	20	19	12	28	30	26	32
ID391	LINE/L1	HAL1ME	CACTTAATACCATTGTATCATGATTGGTCAACAGAAAAATAA	17	13	16	21	27	17	13	19	12	12	13	17	20	0	24	15	8	14	14	0	9	11	21	26	12	14	12	12	12	17	9	14
ID392	LINE/L1	HAL1ME	CAGACAAAAAATAAAAGATAATTACAATTGCAAGCCATAATG	0	8	7	0	0	0	10	0	15	11	13	11	0	4	19	4	6	11	22	1	8	5	18	20	12	7	8	5	8	11	17	7
ID393	LINE/L1	HAL1ME	CATAATCACAATAGTAAAAGATGTTTATCAGTTTTCACAATC	32	24	23	22	18	22	28	37	24	27	24	28	26	18	36	23	7	27	26	12	14	8	36	31	21	23	18	12	28	28	26	30
ID394	LINE/L1	HAL1ME	CATAATGGGAACATGATTAACCTAACAATATAAAATAATTAC	16	13	7	17	8	17	22	23	21	10	14	19	11	11	23	11	8	13	15	5	13	10	19	17	13	15	12	10	13	14	24	23
ID395	LINE/L1	HAL1ME	CATGATACAATGGTATTAAGTGAGTAATAGTTACATAATCAC	10	12	13	6	8	18	9	11	11	17	6	17	9	10	19	14	4	12	13	3	13	8	8	16	10	13	8	4	12	8	8	10
ID396	LINE/L1	HAL1ME	CATGATTAACCTAACAATATAAAATAATTACATACAATTTGG	16	15	16	17	13	23	18	18	16	13	14	12	18	18	20	20	15	12	16	5	10	11	23	16	10	14	13	13	13	13	20	15
ID397	LINE/L1	HAL1ME	CCAATCATGATACAATGGTATTAAGTGAGTAATAGTTACATA	9	11	11	4	6	13	9	9	5	10	6	11	8	6	20	9	3	9	10	0	10	9	5	14	9	9	8	5	11	6	5	12
ID398	LINE/L1	HAL1ME	CCATAATGGGAACATGATTAACCTAACAATATAAAATAATTA	13	13	7	13	8	15	18	20	17	7	12	18	10	11	24	11	7	13	12	4	11	9	17	18	14	15	10	10	13	13	19	19
ID399	LINE/L1	HAL1ME	CCCATTATGGCTTGCAATTGTAATTATCTTTTATTTTTTGTC	6	8	5	14	6	12	8	19	12	12	9	8	8	3	16	5	5	5	17	1	6	2	12	19	9	7	6	4	5	9	11	5
ID400	LINE/L1	HAL1ME	CCCCAAATTGTATGTAATTATTTTATATTGTTAGGTTAATCA	12	9	10	16	5	16	17	13	13	8	8	10	10	10	17	12	8	11	11	5	7	6	19	15	9	7	9	8	7	11	17	15
ID401	LINE/L1	HAL1ME	CCCCCAAATTGTATGTAATTATTTTATATTGTTAGGTTAATC	9	10	10	19	5	15	14	14	14	8	7	9	8	9	18	12	5	10	8	5	4	5	19	14	8	7	8	5	6	11	16	13
ID402	LINE/L1	HAL1ME	CTATTACTCACTTAATACCATTGTATCATGATTGGTCAACAG	13	14	13	11	27	12	9	12	5	10	9	17	12	7	19	10	6	12	8	0	7	9	12	20	7	14	8	8	13	9	6	10
ID403	LINE/L1	HAL1ME	CTATTATTTTTCTGTTGACCAATCATGATACAATGGTATTAA	16	9	12	19	28	16	11	21	13	7	15	14	21	14	23	14	10	12	13	1	10	13	23	24	13	10	11	12	15	15	7	13
ID404	LINE/L1	HAL1ME	CTATTGATTGTGAAAACTGATAAACATCTTTTACTATTGTGA	39	24	26	31	23	26	27	34	24	29	23	21	30	18	43	30	11	30	22	11	21	12	36	33	21	21	19	12	29	32	26	32
ID405	LINE/L1	HAL1ME	CTATTGTGATTATGTAACTATTACTCACTTAATACCATTGTA	0	7	11	0	0	0	10	0	9	0	0	14	0	8	18	12	0	11	15	2	10	4	8	18	9	11	8	3	11	8	7	10
ID406	LINE/L1	HAL1ME	CTTAATACCATTGTATCATGATTGGTCAACAGAAAAATAATA	14	10	12	17	28	18	10	21	12	9	12	15	22	15	24	14	10	13	14	1	9	12	23	22	14	11	10	12	13	13	7	12
ID407	LINE/L1	HAL1ME	CTTGCAATTGTAATTATCTTTTATTTTTTGTCTGGCTATTGA	11	8	9	14	9	14	14	21	14	10	18	9	12	7	19	4	9	9	16	2	6	4	20	17	11	6	9	8	8	9	14	9
ID408	LINE/L1	HAL1ME	CTTTTACTATTGTGATTATGTAACTATTACTCACTTAATACC	12	9	11	5	13	10	14	8	15	14	13	15	7	8	20	11	4	8	16	4	7	3	10	20	13	12	14	5	13	9	12	19
ID409	LINE/L1	HAL1ME	CTTTTATTTTTTGTCTGGCTATTGATTGTGAAAACTGATAAA	0	13	14	0	0	0	28	0	25	19	0	27	0	19	34	12	13	17	28	6	15	13	29	36	19	12	14	13	19	20	22	21
ID410	LINE/L1	HAL1ME	GAAAACTGATAAACATCTTTTACTATTGTGATTATGTAACTA	24	17	20	12	16	14	24	30	22	26	22	31	16	17	37	24	11	22	24	9	17	12	25	34	18	20	17	13	22	24	22	28
ID411	LINE/L1	HAL1ME	GACCAATCATGATACAATGGTATTAAGTGAGTAATAGTTACA	9	15	10	4	8	12	9	7	3	10	9	13	8	7	20	11	5	10	10	0	8	10	4	16	11	13	7	7	13	8	5	10
ID412	LINE/L1	HAL1ME	GAGTAATAGTTACATAATCACAATAGTAAAAGATGTTTATCA	0	17	14	4	15	14	16	16	17	20	19	23	11	11	25	15	9	15	20	8	17	7	14	23	13	19	15	11	13	13	18	23
ID413	LINE/L1	HAL1ME	GATAAACATCTTTTACTATTGTGATTATGTAACTATTACTCA	0	18	14	5	16	15	16	15	17	23	21	24	14	0	28	16	10	18	23	10	18	8	15	28	13	21	17	12	17	15	20	23
ID414	LINE/L1	HAL1ME	GATGTTTATCAGTTTTCACAATCAATAGCCAGACAAAAAATA	24	12	14	25	11	17	31	32	29	18	21	20	23	16	27	12	11	20	20	6	17	16	28	29	17	10	11	13	17	20	20	23
ID415	LINE/L1	HAL1ME	GCCAGACAAAAAATAAAAGATAATTACAATTGCAAGCCATAA	14	10	8	15	9	16	13	21	20	9	17	8	11	5	20	4	6	12	19	1	7	7	22	22	10	7	8	5	9	11	20	8
ID416	LINE/L1	HAL1ME	GGGAACATGATTAACCTAACAATATAAAATAATTACATACAA	15	9	7	11	6	15	16	12	8	6	8	6	9	9	14	10	5	5	12	3	7	7	12	9	5	11	4	6	8	9	13	14
ID417	LINE/L1	HAL1ME	GTAAAAGATGTTTATCAGTTTTCACAATCAATAGCCAGACAA	36	18	23	29	27	25	37	37	25	24	24	19	28	17	30	23	18	28	22	10	17	14	30	30	22	12	21	18	25	28	21	24
ID418	LINE/L1	HAL1ME	GTAACTATTACTCACTTAATACCATTGTATCATGATTGGTCA	0	15	11	4	10	12	8	9	5	10	8	13	9	9	19	12	6	11	10	0	8	10	7	17	11	13	8	9	14	8	4	9
ID419	LINE/L1	HAL1ME	GTAATTATCTTTTATTTTTTGTCTGGCTATTGATTGTGAAAA	13	14	12	19	10	16	12	28	19	14	23	19	15	10	27	13	9	12	19	5	12	7	29	21	17	11	15	10	12	13	20	9
ID420	LINE/L1	HAL1ME	GTATTAAGTGAGTAATAGTTACATAATCACAATAGTAAAAGA	13	10	13	6	14	11	16	9	13	17	13	15	8	12	20	13	6	10	18	4	9	6	12	25	14	13	13	9	15	11	13	21
ID421	LINE/L1	HAL1ME	GTCTGGCTATTGATTGTGAAAACTGATAAACATCTTTTACTA	43	22	25	34	27	32	30	39	27	23	23	18	29	0	32	25	15	25	23	12	20	16	31	33	24	14	24	20	29	33	27	27
ID422	LINE/L1	HAL1ME	GTGAAAACTGATAAACATCTTTTACTATTGTGATTATGTAAC	33	22	21	9	21	17	30	34	21	25	23	33	18	0	40	26	10	24	28	10	17	9	31	35	20	24	19	13	27	30	22	33
ID423	LINE/L1	HAL1ME	GTTTATCAGTTTTCACAATCAATAGCCAGACAAAAAATAAAA	26	12	15	24	14	22	30	27	26	21	25	25	26	19	33	12	15	18	26	6	16	18	27	36	18	11	16	16	19	23	21	23
ID424	LINE/L1	HAL1ME	GTTTTCACAATCAATAGCCAGACAAAAAATAAAAGATAATTA	21	16	16	26	14	22	18	33	23	16	23	25	17	16	34	14	10	14	21	4	18	14	34	31	17	16	19	10	19	14	22	15
ID425	LINE/L1	HAL1ME	TAAAAGATGTTTATCAGTTTTCACAATCAATAGCCAGACAAA	36	20	25	30	28	24	37	41	28	24	27	17	29	19	27	26	18	26	23	10	18	15	33	31	23	14	20	18	27	28	22	25
ID426	LINE/L1	HAL1ME	TAACTATTACTCACTTAATACCATTGTATCATGATTGGTCAA	0	14	11	0	0	0	10	0	6	10	0	18	0	8	20	11	0	11	8	0	8	9	8	17	11	13	8	9	14	8	6	10
ID427	LINE/L1	HAL1ME	TAATACCATTGTATCATGATTGGTCAACAGAAAAATAATAGA	17	6	10	19	25	17	12	20	13	9	17	14	20	13	23	12	8	11	13	0	9	11	21	25	14	7	12	10	15	17	6	14
ID428	LINE/L1	HAL1ME	TAATCACAATAGTAAAAGATGTTTATCAGTTTTCACAATCAA	43	24	25	34	23	27	32	41	25	29	26	25	31	19	43	28	8	31	31	12	20	13	38	36	24	23	20	13	32	32	28	35
ID429	LINE/L1	HAL1ME	TAATTACAATTGCAAGCCATAATGGGAACATGATTAACCTAA	12	5	6	11	4	9	13	12	9	9	4	4	3	0	14	6	1	8	11	1	7	2	8	12	7	6	4	5	2	7	11	13
ID430	LINE/L1	HAL1ME	TACATAATCACAATAGTAAAAGATGTTTATCAGTTTTCACAA	30	24	20	14	20	18	28	40	24	26	25	30	24	16	36	24	7	23	23	14	15	9	39	28	20	24	15	11	26	25	25	33
ID431	LINE/L1	HAL1ME	TACTCACTTAATACCATTGTATCATGATTGGTCAACAGAAAA	21	16	18	19	31	14	19	17	9	14	16	21	19	9	22	17	8	16	16	0	10	12	22	26	13	19	12	12	15	20	10	19
ID432	LINE/L1	HAL1ME	TATTACTCACTTAATACCATTGTATCATGATTGGTCAACAGA	16	13	13	12	26	12	13	12	5	11	12	18	15	7	19	10	6	14	11	0	9	9	13	21	11	15	10	10	13	11	6	13
ID433	LINE/L1	HAL1ME	TATTTTTCTGTTGACCAATCATGATACAATGGTATTAAGTGA	0	15	17	21	29	19	16	19	13	13	13	18	22	14	23	16	8	16	16	0	9	11	22	27	13	16	12	14	16	18	11	16
ID434	LINE/L1	HAL1ME	TCAGTTTTCACAATCAATAGCCAGACAAAAAATAAAAGATAA	20	16	15	25	15	24	18	32	24	14	21	27	17	18	36	13	11	13	21	5	17	16	31	33	22	16	16	11	20	15	21	17
ID435	LINE/L1	HAL1ME	TCATGATACAATGGTATTAAGTGAGTAATAGTTACATAATCA	11	13	15	6	10	19	11	13	11	15	6	18	10	10	21	15	5	13	12	3	13	8	9	18	10	16	9	7	13	9	10	12
ID436	LINE/L1	HAL1ME	TCTTTTATTTTTTGTCTGGCTATTGATTGTGAAAACTGATAA	22	13	14	21	13	20	19	23	24	19	20	26	21	18	34	12	12	15	27	6	16	14	28	33	19	13	14	13	19	18	21	19
ID437	LINE/L1	HAL1ME	TGATACAATGGTATTAAGTGAGTAATAGTTACATAATCACAA	11	12	14	6	9	18	10	10	10	18	7	16	11	12	21	15	6	11	16	3	11	5	8	17	11	13	9	5	13	8	7	12
ID438	LINE/L1	HAL1ME	TGCAAGCCATAATGGGAACATGATTAACCTAACAATATAAAA	10	11	11	15	5	14	17	19	12	9	13	14	9	8	22	10	5	9	10	5	8	7	13	21	15	11	12	8	7	11	15	20
ID439	LINE/L1	HAL1ME	TGCAAGCCATAATGGGAACATGATTAACTTAACAATATAAAA	13	10	6	18	6	16	9	14	14	9	10	11	12	6	11	10	4	10	10	4	8	4	17	9	12	11	8	4	11	12	16	13
ID440	LINE/L1	HAL1ME	TGGGAACATGATTAACCTAACAATATAAAATAATTACATACA	17	11	8	16	7	15	17	18	10	6	9	11	10	0	19	12	5	5	14	5	11	9	16	14	9	13	7	6	9	11	19	15
ID441	LINE/L1	HAL1ME	TGGTATTAAGTGAGTAATAGTTACATAATCACAATAGTAAAA	0	9	13	0	0	0	18	0	17	0	0	17	0	0	24	12	0	10	17	3	11	6	15	26	14	13	15	6	14	12	11	20
ID442	LINE/L1	HAL1ME	TGTAATTATCTTTTATTTTTTGTCTGGCTATTGATTGTGAAA	14	16	13	19	13	16	12	27	19	14	23	19	15	10	27	13	9	12	19	7	13	7	30	22	18	11	14	10	13	14	21	9
ID443	LINE/L1	HAL1ME	TGTGAAAACTGATAAACATCTTTTACTATTGTGATTATGTAA	34	26	23	10	24	19	31	39	27	27	25	35	24	19	39	27	11	24	29	13	19	13	39	35	22	27	21	14	27	29	25	34
ID444	LINE/L1	HAL1ME	TGTTTATCAGTTTTCACAATCAATAGCCAGACAAAAAATAAA	24	12	14	27	12	21	30	30	27	20	25	23	25	18	30	11	14	18	24	5	17	18	26	33	19	11	15	16	19	21	20	22
ID445	LINE/L1	HAL1ME	TTACAATTGCAAGCCATAATGGGAACATGATTAACCTAACAA	0	4	7	0	0	0	16	0	5	7	0	7	0	4	16	6	0	8	11	2	6	3	5	15	7	5	5	4	6	9	11	18
ID446	LINE/L1	HAL1ME	TTACTCACTTAATACCATTGTATCATGATTGGTCAACAGAAA	20	15	18	19	30	14	18	17	8	14	16	21	19	9	23	18	8	15	16	0	10	12	19	25	12	18	12	12	15	19	9	18
ID447	LINE/L1	HAL1ME	TTCACAATCAATAGCCAGACAAAAAATAAAAGATAATTACAA	0	14	11	14	12	13	11	20	13	8	16	16	15	0	19	12	8	14	15	5	10	5	24	21	14	9	11	9	13	13	16	10
ID448	LINE/L1	HAL1ME	TTGCAAGCCATAATGGGAACATGATTAACCTAACAATATAAA	0	10	11	0	0	0	18	0	11	0	0	13	0	7	19	10	0	8	11	5	8	5	10	17	14	11	11	7	6	12	13	22
ID449	LINE/L1	HAL1ME	TTGCAAGCCATAATGGGAACATGATTAACTTAACAATATAAA	0	12	5	15	5	16	9	0	14	8	9	8	12	8	10	10	5	9	9	3	8	6	17	9	11	12	8	6	11	11	15	10
ID450	LINE/L1	L1-2_BT	AAAAATGATACAAATGAACTTATTTACAAAACAGAAACAGAC	57	21	29	53	33	37	39	54	39	47	49	42	47	41	77	37	28	37	52	23	40	43	60	69	37	33	32	30	40	45	54	44
ID451	LINE/L1	L1-2_BT	AAAACAGAAACAGACTCACAGACATAGAAAACAAACTTATGG	26	14	20	16	17	17	21	18	13	27	23	40	20	0	47	16	23	19	23	8	15	12	20	36	24	17	20	18	21	19	23	20
ID452	LINE/L1	L1-2_BT	AAAATAGATAAACAACAAGGACCTACTGTATAGCACAGGGAA	10	12	10	13	2	11	5	15	12	10	7	1	20	9	13	9	10	9	13	5	7	7	19	19	16	14	12	8	12	11	11	6
ID453	LINE/L1	L1-2_BT	AAAATAGATAACCAACAAGGACCTACTGTATAGCACAGGGAA	53	45	31	47	32	26	44	50	37	46	28	33	58	41	53	30	36	27	37	16	33	29	53	52	27	42	44	35	37	41	50	43
ID454	LINE/L1	L1-2_BT	AAAATGATACAAATGAACTTATTTACAAAACAGAAACAGACT	61	30	35	54	41	41	45	54	42	53	54	49	55	47	82	43	35	39	61	27	43	45	64	74	43	41	33	37	46	46	58	49
ID455	LINE/L1	L1-2_BT	AAAATGGATAACCAACAAGGACCTACTGTATAGCACAGGGAA	0	46	37	0	0	0	71	0	43	47	0	60	0	55	77	37	0	59	47	15	43	42	67	112	43	42	43	34	58	81	64	74
ID456	LINE/L1	L1-2_BT	AAACAACAAGGTCCTACTGTATAGCACAGGGAACTATATTCA	29	59	51	63	49	42	26	51	54	52	53	58	79	39	94	53	47	37	69	25	23	45	68	93	53	58	48	41	65	35	66	29
ID457	LINE/L1	L1-2_BT	AAACACAGCAGTGTGTCCATGTCCATCCCAGACTCCCTGACT	11	5	9	198	18	20	9	89	0	26	23	31	16	22	10	10	24	35	25	8	20	33	22	22	15	12	23	19	3	11	10	11
ID458	LINE/L1	L1-2_BT	AAACAGAAACAGACTCACAGACATAGAAAACAAACTTATGGT	30	16	22	21	16	17	20	19	12	27	23	38	24	22	48	16	24	16	21	7	15	15	22	38	24	15	20	19	23	21	28	19
ID459	LINE/L1	L1-2_BT	AAACAGACTCACAGACATAGAAAACAAACTTATGGTTACCAA	31	25	24	9	20	18	22	12	14	28	32	31	31	21	41	25	25	22	27	5	25	22	17	35	30	24	23	27	28	31	18	23
ID460	LINE/L1	L1-2_BT	AAACTAACACAACATTGTAAAGCAACTATACTCCAATAAAAA	53	28	51	24	55	49	55	18	27	50	37	46	70	39	98	60	38	37	58	20	58	37	29	85	32	14	44	27	43	49	32	59
ID461	LINE/L1	L1-2_BT	AAACTAACACAACATTGTAAATCAACTATACTCCAATAAAAA	50	35	41	38	44	40	36	38	29	42	24	34	38	0	81	45	29	49	43	27	32	30	40	80	30	33	26	32	31	39	38	39
ID462	LINE/L1	L1-2_BT	AAACTATTATATATAGAATGGATAAACAACAAGGTCCTACTG	14	5	9	12	5	13	11	12	8	11	6	9	11	8	19	7	7	6	12	2	6	6	12	18	7	6	11	5	6	10	10	10
ID463	LINE/L1	L1-2_BT	AAACTCCCCTCCCATCCAGGCTGCCACATAACATTGAGCAGA	151	113	112	113	116	121	144	125	120	113	125	129	125	78	206	126	60	112	108	65	89	74	131	204	97	111	90	60	127	143	137	140
ID464	LINE/L1	L1-2_BT	AAAGACAAATACCATATGATATCACTTATATGTGGAATCTAA	87	36	44	57	53	71	50	66	61	58	56	63	58	48	79	50	39	48	54	25	38	44	78	94	50	48	41	39	58	78	72	55
ID465	LINE/L1	L1-2_BT	AAAGACAAATATCATATGATATCACTTATATGTGGAATCTAA	63	43	46	43	41	36	51	57	48	38	53	36	63	36	83	53	23	51	48	25	33	29	64	72	46	43	50	31	48	64	54	52
ID466	LINE/L1	L1-2_BT	AAAGGGACTCAGCCATACATATACATGTATCCATTCTCCCCC	83	67	74	27	67	74	70	34	54	72	90	77	58	60	115	69	48	58	61	35	59	47	51	113	47	55	39	46	75	80	50	79
ID467	LINE/L1	L1-2_BT	AAATACAGCAGTGTGTCCATGTCCATCCCAGACTCCCTGACT	18	10	18	18	15	7	15	38	1	17	17	18	19	12	22	10	29	21	21	13	18	15	24	60	144	10	14	20	31	15	4	8
ID468	LINE/L1	L1-2_BT	AAATAGATAACCAACAAGGACCTACTGTATAGCACAGGGAAC	43	40	27	42	29	26	38	45	38	43	23	29	60	37	46	23	34	19	37	15	32	25	47	46	26	37	42	29	33	37	45	35
ID469	LINE/L1	L1-2_BT	AAATATAGCAGTGTGTACATGTCCATCCCAAACTCCCTAACT	54	47	50	51	49	68	49	53	45	50	47	53	63	37	86	42	33	43	59	23	35	36	52	84	47	46	39	50	46	64	49	52
ID470	LINE/L1	L1-2_BT	AAATGAACTTACTTACAAAACAGAAAGAGACTCACAGACTTA	39	20	16	30	17	22	32	35	24	13	28	19	22	0	33	20	22	21	17	10	24	14	34	35	23	21	18	25	16	30	28	28
ID471	LINE/L1	L1-2_BT	AAATGAACTTATTTACAAAACAGAAACAGACTCACAGACATA	35	29	41	48	38	35	24	45	35	36	47	48	51	46	60	35	42	33	48	17	30	36	51	55	34	40	37	40	41	38	41	30
ID472	LINE/L1	L1-2_BT	AAATGAACTTATTTACAAAACAGAAATAGACTCACAGACATA	43	15	28	33	27	43	30	42	27	41	34	42	34	25	47	20	17	25	42	15	28	18	45	51	33	20	30	20	25	37	39	32
ID473	LINE/L1	L1-2_BT	AAATGATACAAATGAACTTATTTACAAAACAGAAACAGACTC	66	41	46	69	59	47	52	67	48	65	69	54	81	56	96	58	47	52	71	31	56	45	79	94	55	48	37	38	62	55	62	55
ID474	LINE/L1	L1-2_BT	AAATGGATAACCAACAAGGACCTACTGTATAGCACAGGGAAC	74	51	38	66	40	38	71	62	46	51	38	54	54	56	75	40	42	66	49	17	44	41	70	113	39	48	44	34	64	83	64	76
ID475	LINE/L1	L1-2_BT	AAATGGATAACCAACAAGGACCTACTGTATAGCACATGGAAC	44	31	17	29	18	37	40	37	28	41	27	37	50	0	63	22	33	16	42	8	30	27	40	60	37	29	27	35	44	36	36	49
ID476	LINE/L1	L1-2_BT	AACAACAAGGTCCTACTGTATAGCACAGGGAACTATATTCAA	22	44	40	58	36	30	21	47	44	46	47	58	63	31	86	40	39	29	61	20	19	28	61	85	41	47	40	34	54	32	56	26
ID477	LINE/L1	L1-2_BT	AACAAGGACCTACTGTATAGCACAGGGAACTCTACTCAATAT	0	22	20	0	0	5	21	0	12	14	16	19	0	19	27	14	11	14	15	4	19	11	27	29	19	20	10	13	17	16	24	18
ID478	LINE/L1	L1-2_BT	AACAAGGACCTACTGTATAGCACAGGGAACTCTGCTCAATGT	0	39	24	54	20	19	51	41	41	37	26	34	35	25	52	22	30	38	33	13	28	23	42	67	28	34	27	23	35	53	52	49
ID479	LINE/L1	L1-2_BT	AACAAGGACCTACTGTATAGCACATGGAACTCTGCTCAATGT	33	24	11	37	17	23	28	28	30	29	26	27	42	19	54	13	17	8	24	7	16	22	43	50	28	22	21	20	29	33	26	30
ID480	LINE/L1	L1-2_BT	AACAAGGTCCTACTGTATAGCACAGGGAACTATATTCAATAT	29	52	53	72	47	39	27	73	57	66	56	73	73	53	95	49	46	46	68	23	39	40	71	102	68	55	47	41	62	38	74	30
ID481	LINE/L1	L1-2_BT	AACAATGTTGTGATAGTTTCAGGTGAACAGCAAAGGGACTCA	47	41	71	6	55	69	47	9	11	65	76	46	84	82	99	78	79	60	32	40	48	55	11	99	57	42	51	62	61	53	13	43
ID482	LINE/L1	L1-2_BT	AACAATGTTGTGATAGTTTCAGGTGGACAGCAAAGGGACTCA	102	61	80	26	67	98	74	33	37	79	91	106	94	77	114	79	50	83	82	42	73	59	38	119	87	53	66	2	95	81	46	78
ID483	LINE/L1	L1-2_BT	AACACAGCAGTGTGTCCATGTCCATCCCAGACTCCCTGACTA	0	3	9	0	0	18	9	0	0	21	21	23	0	20	9	5	22	30	22	4	18	21	20	15	12	11	16	16	3	11	5	11
ID484	LINE/L1	L1-2_BT	AACAGAAACAGACTCACAGACATAGAAAACAAACTTATGGTT	33	20	23	19	17	18	20	17	13	28	24	37	26	23	48	17	25	16	21	7	16	16	23	35	24	19	20	20	25	25	21	18
ID485	LINE/L1	L1-2_BT	AACAGCAAAGGGACTCAGCCATACATATACATGTATCCATTC	54	39	48	9	50	56	36	9	24	40	55	33	48	35	71	46	30	39	23	22	30	24	18	77	39	38	37	33	46	41	25	43
ID486	LINE/L1	L1-2_BT	AACATGGAGAACCAGCAAGGACCTGCTGGACAGCACAGGGAA	40	29	29	139	17	14	31	44	0	42	45	28	31	28	47	3	25	23	16	25	39	27	36	115	123	27	11	32	36	37	33	20
ID487	LINE/L1	L1-2_BT	AACATTGAGCAGAGTTCCATGTGCTATACAGTAGGTCCTTGT	0	26	12	0	0	0	29	0	34	0	0	25	0	0	52	13	0	9	26	6	18	21	46	52	28	22	20	20	30	34	30	30
ID488	LINE/L1	L1-2_BT	AACATTGAGCAGAGTTCCCTGTGCTATACAGTAGGTCCTTGT	56	37	24	52	26	19	48	39	38	38	29	32	33	0	49	30	26	38	35	15	25	24	37	62	25	33	25	19	33	56	50	47
ID489	LINE/L1	L1-2_BT	AACCAACAAGGACCTACTGTATAGCACAGGGAACTCTGCTCA	93	75	48	70	53	44	88	66	59	82	64	68	78	71	88	50	66	78	82	27	65	55	74	132	47	73	56	61	78	90	83	86
ID490	LINE/L1	L1-2_BT	AACCAGCAAGGACCTGCTGGACAGCACAGGGAACTCTGCTCA	34	40	46	186	20	23	37	60	1	60	50	45	35	43	48	2	38	28	22	27	53	42	48	126	205	37	20	39	43	41	34	25
ID491	LINE/L1	L1-2_BT	AACCTAAATGTCCATCAACAGATGAATGGATAAAGAAGATGT	53	19	20	40	19	23	53	48	34	41	43	54	33	32	70	20	37	28	39	9	32	25	50	65	45	24	20	37	28	52	44	57
ID492	LINE/L1	L1-2_BT	AACCTTATGGTCACCAGGGGGAAGGATGGGGGAAGGGATAGT	13	7	11	107	9	5	14	13	0	3	4	6	8	15	5	9	32	17	5	9	23	13	20	8	83	4	1	9	6	12	4	4
ID493	LINE/L1	L1-2_BT	AACTAATGAGAACCTACTGTATAGCACAGGGAACTCTACTCA	0	22	23	0	0	0	36	0	33	0	0	29	0	27	27	12	0	25	25	6	14	19	21	34	19	23	17	27	21	28	16	34
ID494	LINE/L1	L1-2_BT	AACTATATTCAATATCCTGTGATAAACCATAATGGAAAAGAA	65	65	70	83	59	53	60	73	86	92	87	87	72	60	113	62	59	80	91	36	73	73	97	118	61	61	67	66	76	50	94	59
ID495	LINE/L1	L1-2_BT	AACTATTATATATAGAATGGATAAACAACAAGGTCCTACTGT	13	5	9	11	5	10	10	11	7	10	6	9	10	8	20	7	8	7	12	2	6	7	13	20	7	6	11	6	5	9	10	9
ID496	LINE/L1	L1-2_BT	AACTCCCCTCCCATCCAGGCTGCCACATAACATTGAGCAGAG	145	118	107	115	112	117	142	117	115	105	119	128	119	76	207	120	65	113	103	64	83	72	123	197	94	113	82	59	124	146	138	136
ID497	LINE/L1	L1-2_BT	AACTCTACTCAGTGCTCTGTGGTGACCTAAATGGGAAGGAAA	102	51	45	16	58	19	99	16	13	41	37	48	62	66	84	41	56	63	33	22	30	67	10	104	16	52	51	56	46	89	8	97
ID498	LINE/L1	L1-2_BT	AACTCTGCTCAATACTCTGTAATAACCTTATGGTCACCAGGG	0	5	8	134	5	13	14	20	0	2	6	0	11	2	4	5	10	23	2	4	20	4	25	20	10	9	0	12	13	15	3	6
ID499	LINE/L1	L1-2_BT	AACTCTGCTCAATGTTATGTGGCAGCCTGGATGGGAGGGGAG	149	116	107	125	110	118	148	127	116	104	105	127	119	75	202	119	70	112	107	62	85	73	130	196	87	110	83	61	131	153	140	141
ID500	LINE/L1	L1-2_BT	AACTCTGCTCAGTACTCTGTAATAACCTTATGGTCACCAGGG	3	0	1	0	0	0	0	0	0	0	1	0	0	1	0	0	0	8	0	0	1	0	0	0	84	5	0	0	0	1	0	0
ID501	LINE/L1	L1-2_BT	AACTGAATCACTTTGCTGTACACCTGAAACTAACACAACATT	61	38	58	1	62	49	52	1	3	66	58	47	62	38	102	62	41	66	75	30	36	41	2	112	59	39	38	45	2	65	8	57
ID502	LINE/L1	L1-2_BT	AACTGATTCACTTTGCTGTACAGCAGAAACTAACACAACATT	35	19	22	1	20	24	19	2	4	26	18	25	23	22	39	21	8	21	27	11	20	17	3	35	25	16	7	18	10	34	2	20
ID503	LINE/L1	L1-2_BT	AACTTATTTACAAAACAGAAACAGACTCACAGACATAGAAAA	41	35	37	46	35	44	32	43	45	40	37	56	46	34	81	31	30	33	39	14	25	25	53	57	36	39	32	27	44	40	56	35
ID504	LINE/L1	L1-2_BT	AAGAATGGAATATTGACATTTGCAGCAACATGGAAGGTATAC	0	0	0	0	0	0	4	0	0	18	0	0	3	2	0	0	45	4	16	0	0	4	0	1	0	0	0	307	1	1	0	1
ID505	LINE/L1	L1-2_BT	AAGACAAATACCATATGATATCACTTATATGTGGAATCTAAA	89	40	44	61	53	70	54	68	69	60	55	61	56	48	80	49	40	51	56	26	41	42	79	96	51	49	41	41	58	80	74	58
ID506	LINE/L1	L1-2_BT	AAGACAAATATCATATGATATCACTTATATGTGGAATCTAAA	63	43	44	42	37	34	49	56	48	36	50	37	63	0	84	52	23	50	47	24	31	28	62	69	43	43	48	29	49	66	54	49
ID507	LINE/L1	L1-2_BT	AAGGACCTACTGTATAGCACAGGGAACTCTACTCAATATTCT	0	23	16	23	12	5	26	23	10	15	16	24	21	0	27	11	12	16	22	2	12	9	25	38	19	19	15	14	18	22	19	26
ID508	LINE/L1	L1-2_BT	AAGGACCTACTGTATAGCACAGGGAACTCTGCTCAATGTTAT	58	34	24	62	30	17	54	45	42	39	32	32	40	25	52	30	22	41	35	14	29	20	39	62	25	31	30	20	36	64	44	56
ID509	LINE/L1	L1-2_BT	AAGGACCTGCTGGACAGCACAGGGAACTCTGCTCAATACTCT	0	25	17	0	0	0	0	0	0	0	0	9	0	6	57	2	0	16	7	8	34	10	27	129	26	23	4	17	23	21	30	13
ID510	LINE/L1	L1-2_BT	AAGGACCTGCTGGACAGCACAGGGAACTCTGCTCAGTACTCT	9	2	3	0	3	0	0	0	0	0	8	2	3	3	5	0	1	4	0	2	1	1	2	4	146	3	0	2	4	4	0	1
ID511	LINE/L1	L1-2_BT	AAGGATGGGGGAAGGGATAGTCAGGGAGTCTGGGATGGACAT	22	14	19	279	30	23	18	102	6	24	17	13	24	0	23	17	51	44	18	14	29	24	52	57	164	17	12	33	14	17	28	9
ID512	LINE/L1	L1-2_BT	AAGGGACTCAGCCATACATATACATGTATCCATTCTCCCCCA	0	117	119	66	122	129	119	72	102	130	146	115	105	99	191	128	53	102	106	57	111	75	94	184	94	104	96	50	126	135	102	131
ID513	LINE/L1	L1-2_BT	AAGGGATAGTCAGGGAGTCTGGGATGGACATGGACACACTGC	27	18	41	180	30	25	25	77	1	29	23	39	31	32	30	25	45	51	24	17	45	29	51	70	151	23	22	34	31	25	6	20
ID514	LINE/L1	L1-2_BT	AAGGGATAGTTAGGGAGTTTGGGATGGACATGTACACACTGC	54	42	37	40	42	43	47	36	31	42	48	40	40	32	74	38	42	36	44	23	35	23	47	53	31	39	33	36	30	59	39	46
ID515	LINE/L1	L1-2_BT	AAGGTCCTACTGTATAGCACAGGGAACTATATTCAATATCCT	26	48	44	56	35	29	21	51	49	51	49	64	59	48	66	44	43	44	57	13	39	37	63	74	44	48	41	37	41	34	69	23
ID516	LINE/L1	L1-2_BT	AAGGTTATTACAGAGTATTGAGCAGAGTTCCCTGTGCTGTCC	0	18	11	0	0	9	11	0	0	5	23	4	0	4	40	2	8	11	7	6	20	6	18	83	23	13	3	7	11	19	1	4
ID517	LINE/L1	L1-2_BT	AAGTCAGAAAGAGAAAGACAAATACCATATGATATCACTTAT	60	17	31	34	27	36	40	42	45	29	27	45	39	32	61	29	26	34	36	13	24	32	54	62	34	17	25	27	28	45	50	46
ID518	LINE/L1	L1-2_BT	AAGTTCATTTGTATCATTTCTTTTTAGATTCCACATATAAGG	84	58	50	68	50	54	72	74	58	67	54	58	63	48	97	58	45	68	73	27	59	51	76	106	46	52	43	45	58	83	68	65
ID519	LINE/L1	L1-2_BT	AAGTTTGTTTTCTATGTCTGTGAGTCTGTTTCTGTTTTGTAA	26	23	23	20	26	28	25	21	20	42	31	45	33	26	55	25	26	18	38	16	23	25	28	36	35	28	27	22	27	26	23	26
ID520	LINE/L1	L1-2_BT	AATAACCTTATGGTCACCAGGGGGAAGGATGGGGGAAGGGAT	18	8	11	90	7	5	15	9	0	2	4	6	8	0	3	8	33	18	6	9	22	13	21	8	84	6	1	9	3	12	2	4
ID521	LINE/L1	L1-2_BT	AATACAGCAGTGTGTCCATGTCCATCCCAGACTCCCTGACTA	17	8	16	15	12	5	15	30	1	16	11	14	17	0	22	7	25	21	16	9	16	10	19	50	135	8	10	17	26	14	2	8
ID522	LINE/L1	L1-2_BT	AATACTCTGTAATAACCTTATGGTCACCAGGGGGAAGGATGG	15	5	6	137	3	13	9	15	0	3	4	2	5	3	3	5	10	21	5	4	18	2	28	14	10	9	0	10	3	11	3	5
ID523	LINE/L1	L1-2_BT	AATAGATAACCAACAAGGACCTACTGTATAGCACAGGGAACT	0	39	27	0	0	26	36	0	36	43	25	28	0	33	43	23	31	19	36	14	31	26	45	51	26	34	39	29	33	40	46	36
ID524	LINE/L1	L1-2_BT	AATATAGCAGTGTGTACATGTCCATCCCAAACTCCCTAACTA	0	43	40	0	0	0	48	0	41	48	0	51	0	33	83	36	30	41	53	22	33	37	51	73	39	38	31	44	40	58	42	46
ID525	LINE/L1	L1-2_BT	AATATAGTTCCCTGTGCTATACAGTAGGACCTTGTTGTTTAT	35	58	47	58	45	41	29	47	54	48	42	54	74	34	93	50	49	37	67	23	23	40	59	89	47	57	39	42	67	36	63	29
ID526	LINE/L1	L1-2_BT	AATATTCTGTAATAACCTATATGGGAAAAGAATCTGAAAAAG	18	13	12	8	14	16	16	12	8	20	12	14	7	0	20	14	10	11	19	6	10	13	9	20	17	12	11	15	12	19	9	14
ID527	LINE/L1	L1-2_BT	AATATTGACATTTGCAGCAACATGGAAGGTATACTATTAAGT	0	0	0	0	0	1	0	0	0	18	1	0	0	3	0	0	48	1	22	0	0	4	0	1	0	0	0	299	0	1	0	0
ID528	LINE/L1	L1-2_BT	AATATTGAGTAGAGTTCCCTGTGCTATACAGTAGGTCCTTGT	19	18	19	18	11	5	21	15	10	12	16	19	26	17	23	9	12	13	13	3	17	10	21	28	17	17	10	13	14	14	19	17
ID529	LINE/L1	L1-2_BT	AATGAACTTACTTACAAAACAGAAAGAGACTCACAGACTTAG	33	16	14	25	14	20	26	32	24	11	23	14	20	21	36	17	19	18	12	9	23	10	34	29	21	15	19	18	14	27	25	25
ID530	LINE/L1	L1-2_BT	AATGAACTTATTTACAAAACAGAAACAGACTCACAGACATAG	32	27	37	40	33	37	23	44	37	35	44	45	46	0	55	32	36	29	42	15	27	34	46	50	31	36	31	34	40	40	47	28
ID531	LINE/L1	L1-2_BT	AATGAACTTATTTACAAAACAGAAATAGACTCACAGACATAG	44	22	31	31	29	46	33	42	24	37	34	42	37	23	47	22	14	24	37	15	27	21	38	53	34	25	32	19	26	39	36	36
ID532	LINE/L1	L1-2_BT	AATGATACAAATGAACTTATTTACAAAACAGAAACAGACTCA	0	41	48	0	0	0	48	0	49	0	0	56	0	54	98	60	0	48	68	33	57	46	79	95	55	50	38	38	63	52	68	48
ID533	LINE/L1	L1-2_BT	AATGGAATATTGACATTTGCAGCAACATGGAAGGTATACTAT	0	0	0	0	0	1	18	0	0	16	1	0	0	2	0	0	51	4	18	0	0	4	0	1	0	0	0	331	0	1	0	2
ID534	LINE/L1	L1-2_BT	AATGGATAAACAACAAGGTCCTACTGTATAGCACAGGGAACT	26	17	21	34	18	23	14	28	27	23	21	28	29	18	47	22	24	21	32	11	10	25	49	50	13	17	27	21	27	20	40	14
ID535	LINE/L1	L1-2_BT	AATGGATAACCAACAAGGACCTACTGTATAGCACAGGGAACT	0	48	36	0	0	35	70	0	45	47	38	51	0	56	75	38	43	66	46	16	44	38	71	107	40	47	42	34	58	82	65	74
ID536	LINE/L1	L1-2_BT	AATGGATACATGTATATGTATGGCTGAGTCCCTTTGCTGTTC	51	36	44	9	46	54	39	7	20	41	48	29	46	0	69	43	30	45	19	22	27	25	17	72	40	35	42	34	44	40	25	43
ID537	LINE/L1	L1-2_BT	AATGTTATGTGGCAGCCTGGATGGGAGGGGAGTTTGGGGGAG	115	75	63	90	74	83	88	96	93	88	89	80	81	51	146	68	52	69	79	33	51	47	104	130	75	78	53	48	73	89	99	87
ID538	LINE/L1	L1-2_BT	AATGTTGTGATAGTTTCAGGTGAACAGCAAAGGGACTCAGCC	43	36	69	7	54	68	41	9	9	62	63	47	75	62	90	71	62	52	31	37	44	47	10	95	54	37	44	46	58	51	13	38
ID539	LINE/L1	L1-2_BT	AATGTTGTGATAGTTTCAGGTGGACAGCAAAGGGACTCAGCC	97	56	74	26	58	86	70	23	25	71	78	80	89	58	96	72	39	79	77	39	73	52	30	100	77	50	58	2	81	69	40	74
ID540	LINE/L1	L1-2_BT	AATTAACAATGTTGTGATAGTTTCAGGTGAACAGCAAAGGGA	0	12	18	0	0	0	16	0	5	18	0	12	0	24	22	22	0	20	11	12	12	15	5	22	14	8	12	21	19	13	2	17
ID541	LINE/L1	L1-2_BT	ACAAAACAGAAACAGACTCACAGACATAGAAAACAAACTTAT	23	19	20	17	21	21	22	17	19	36	26	39	21	27	48	17	26	18	34	11	18	18	18	34	24	22	26	24	24	20	23	22
ID542	LINE/L1	L1-2_BT	ACAAATGAACTTATTTACAAAACAGAAACAGACTCACAGACA	0	26	41	56	40	36	33	56	32	38	47	43	54	45	53	36	52	30	54	20	33	44	53	79	43	34	36	46	41	44	42	38
ID543	LINE/L1	L1-2_BT	ACAAATGAACTTATTTACAAAACAGAAATAGACTCACAGACA	40	18	28	33	29	30	29	33	31	30	32	41	33	17	50	20	15	23	38	15	21	18	43	50	25	18	23	17	29	38	40	31
ID544	LINE/L1	L1-2_BT	ACAACAAGGTCCTACTGTATAGCACAGGGAACTATATTCAAT	22	47	41	53	40	32	22	43	39	46	44	61	61	33	80	41	37	30	56	21	19	29	57	82	46	49	35	32	53	31	61	25
ID545	LINE/L1	L1-2_BT	ACAAGGTCCTACTGTATAGCACAGGGAACTATATTCAATATC	29	51	47	66	39	35	25	65	54	57	52	67	73	53	80	46	47	49	60	20	40	36	66	89	56	53	46	42	51	37	70	26
ID546	LINE/L1	L1-2_BT	ACAATAGCCAAGACATGGAAGCAACCTAAATGTCCATCAACA	60	45	48	49	54	39	57	55	42	49	70	40	40	30	47	39	34	42	50	27	44	36	54	58	46	50	39	27	47	49	58	61
ID547	LINE/L1	L1-2_BT	ACAATGTTGTGATAGTTTCAGGTGAACAGCAAAGGGACTCAG	43	41	70	6	52	66	46	9	11	64	67	42	77	0	95	78	71	54	30	40	45	53	12	101	55	41	48	54	59	54	13	41
ID548	LINE/L1	L1-2_BT	ACAATGTTGTGATAGTTTCAGGTGGACAGCAAAGGGACTCAG	97	58	77	24	64	96	70	30	34	80	89	97	89	69	107	75	45	85	80	41	71	54	33	118	84	51	67	2	94	76	40	72
ID549	LINE/L1	L1-2_BT	ACAATGTTGTGTTAGTTTCAGGTGTACAGCAAAGTGATTCAG	69	48	66	1	72	57	59	0	3	68	61	47	74	48	108	72	45	62	79	33	34	52	3	114	58	42	33	51	2	68	9	61
ID550	LINE/L1	L1-2_BT	ACAATGTTGTGTTAGTTTCTGCTGTACAGCAAAGTGAATCAG	90	48	63	0	59	66	76	1	2	68	33	60	71	49	130	58	36	58	65	28	52	39	2	96	46	26	36	35	43	83	1	82
ID551	LINE/L1	L1-2_BT	ACACACTGCTATATTTAAAATGGATAACCAACAAGGACCTAC	102	77	74	74	75	78	108	70	83	71	67	77	106	66	114	80	69	86	68	37	78	52	74	114	78	75	54	68	77	106	93	103
ID552	LINE/L1	L1-2_BT	ACACACTGCTGTATTTAACATGGAGAACCAGCAAGGACCTGC	0	16	17	0	0	0	32	0	1	22	0	19	0	29	37	33	17	27	9	27	22	13	14	90	89	22	11	23	38	30	7	12
ID553	LINE/L1	L1-2_BT	ACACACTGCTGTGTTTAACATGGAGAACCAGCAAGGACCTGC	26	8	18	149	14	31	15	53	2	26	35	26	23	25	16	17	17	57	26	11	14	30	11	32	9	14	25	32	11	22	8	12
ID554	LINE/L1	L1-2_BT	ACACAGCAGTGTGTCCATGTCCATCCCAGACTCCCTGACTAT	0	3	8	159	12	18	9	62	0	21	21	23	12	0	7	5	22	30	22	4	18	20	17	17	12	11	16	16	3	11	5	11
ID555	LINE/L1	L1-2_BT	ACACCTGAAACTAACACAACATTGTAAATCAACTATACTCCA	49	20	33	26	35	41	37	25	23	34	27	34	32	0	65	30	32	36	36	14	33	28	28	77	44	14	16	28	4	35	21	37
ID556	LINE/L1	L1-2_BT	ACACCTGAAACTAACACAACATTGTAAATCAACTATACTTCA	0	10	22	27	20	29	20	0	18	28	16	22	30	15	45	21	23	35	19	12	16	11	22	42	33	9	10	20	6	31	20	21
ID557	LINE/L1	L1-2_BT	ACACTGCTATATTTAAAATGGATAACCAACAAGGACCTACTG	0	82	71	0	0	0	102	0	78	76	0	77	0	77	117	82	72	88	65	40	70	60	66	121	72	74	50	73	84	106	87	94
ID558	LINE/L1	L1-2_BT	ACACTGCTGTATTTAACATGGAGAACCAGCAAGGACCTGCTG	37	17	17	19	30	16	32	30	1	22	20	19	10	29	37	31	15	30	9	27	21	12	14	90	89	23	11	24	39	31	7	11
ID559	LINE/L1	L1-2_BT	ACACTGCTGTGTTTAACATGGAGAACCAGCAAGGACCTGCTG	26	9	14	147	14	31	16	56	2	26	33	25	22	23	17	20	16	55	25	12	14	29	11	31	7	16	24	25	12	22	8	13
ID560	LINE/L1	L1-2_BT	ACAGAAACAGACTCACAGACATAGAAAACAAACTTATGGTTA	30	16	22	17	13	16	19	16	13	24	22	34	24	21	43	14	25	15	15	3	16	17	24	31	21	16	18	18	24	21	22	20
ID561	LINE/L1	L1-2_BT	ACAGAATATTGAGTAGAGTTCCCTGTGCTATACAGTAGGTCC	0	20	14	0	0	0	0	0	9	0	0	22	0	11	25	8	0	11	14	2	11	8	24	29	20	16	13	10	13	18	14	21
ID562	LINE/L1	L1-2_BT	ACAGAGAAAGACAAATATCATATGATATCACTTATATGTGGA	24	12	14	19	7	10	18	20	18	17	18	15	19	19	29	16	12	17	17	8	10	13	30	30	17	14	12	13	12	24	15	16
ID563	LINE/L1	L1-2_BT	ACAGAGTACTGAGCAGAGTTCCCTGTGCTGTCCAGCAGGTCC	8	1	3	0	3	0	0	0	0	0	6	1	3	0	4	0	1	4	0	2	1	0	2	4	158	3	0	1	2	4	0	1
ID564	LINE/L1	L1-2_BT	ACAGAGTATTGAGCAGAGTTCCCTGTGCTGTCCAGCAGGTCC	0	24	14	0	0	6	16	0	0	7	35	8	0	9	56	2	16	14	8	6	33	10	27	129	29	24	5	15	20	22	31	10
ID565	LINE/L1	L1-2_BT	ACAGCAAAGGGACTCAGCCATACATATACATGTATCCATTCT	0	86	101	29	92	115	94	21	52	86	118	89	100	68	146	89	61	80	79	48	85	66	39	143	76	75	67	56	98	79	60	98
ID566	LINE/L1	L1-2_BT	ACAGCACAGGGAACTCTGCTCAATACTCTGTAATAACCTTAT	0	9	10	0	0	9	13	0	0	5	24	3	0	4	37	4	8	11	5	5	19	6	17	84	23	13	3	9	10	19	1	6
ID567	LINE/L1	L1-2_BT	ACAGCAGAAACTAACACAACATTGTAAAGCAACTATACTCCA	47	26	36	6	36	43	46	4	5	50	30	46	46	27	79	43	25	27	47	17	36	25	7	68	26	15	24	20	30	39	4	52
ID568	LINE/L1	L1-2_BT	ACAGCAGTGTGTCCATGTCCATCCCAGACTCCCTGACTATCC	28	11	26	173	23	25	24	91	1	32	32	39	30	33	32	16	38	50	34	14	41	30	35	69	142	19	23	35	27	25	7	20
ID569	LINE/L1	L1-2_BT	ACAGGATATTGAATATAGTTCCCTGTGCTATACAGTAGGACC	19	37	32	35	21	18	13	36	36	40	38	52	42	31	54	31	31	32	42	7	31	16	46	50	37	37	29	28	28	22	51	14
ID570	LINE/L1	L1-2_BT	ACAGGGAACTATATTCAATATCCTGTGATAAACCATAATGGA	0	62	60	61	47	42	33	53	60	73	65	67	68	41	76	43	46	53	78	24	46	48	78	90	58	61	44	47	46	41	65	34
ID571	LINE/L1	L1-2_BT	ACAGGGAACTCTACTCAGTGCTCTGTGGTGACCTAAATGGGA	66	32	28	11	28	10	66	9	5	24	30	36	37	40	61	26	34	41	19	9	15	41	10	60	14	34	30	35	21	61	3	62
ID572	LINE/L1	L1-2_BT	ACAGGGAACTCTGCTCAATGTTATGTGGCAGCCTGGATGGGA	145	90	83	91	89	98	138	95	96	85	93	106	90	78	170	83	68	96	80	43	72	59	100	144	74	87	81	51	104	143	102	128
ID573	LINE/L1	L1-2_BT	ACAGTAGGTCCTTGTTGGTTATCCATTTTAAATATAGCAGTG	101	74	63	70	71	75	102	62	76	73	56	75	107	69	112	74	61	82	66	38	67	54	62	118	68	69	53	65	82	102	81	93
ID574	LINE/L1	L1-2_BT	ACATAACATTGAGCAGAGTTCCCTGTGCTATACAGTAGGTCC	46	30	26	52	28	17	51	38	37	32	28	29	30	19	47	28	21	39	23	12	22	20	33	57	23	27	28	17	32	57	42	49
ID575	LINE/L1	L1-2_BT	ACATATACATGTATCCATTCTCCCCCAAACTCCCCTCCCATC	99	66	70	58	79	81	72	52	71	72	72	71	57	50	142	64	34	65	73	36	49	45	71	111	77	63	47	37	81	85	76	82
ID576	LINE/L1	L1-2_BT	ACATATATCCCCTCTTTTTTGGATTTCCTTCCCATTTAGGTC	48	38	28	20	38	14	51	18	16	40	25	41	36	42	71	28	23	39	38	11	24	25	16	67	16	36	25	26	28	46	11	56
ID577	LINE/L1	L1-2_BT	ACATCCCTTATATGTGGAATCTAAAAAGAAATGATACAAATG	64	40	45	58	44	43	55	63	41	51	45	51	45	0	86	42	38	49	52	23	41	33	49	85	30	39	38	41	44	59	56	50
ID578	LINE/L1	L1-2_BT	ACATGGAACTCTGCTCAATGTTATGTGGCAGCCTGGATGGGA	62	48	41	59	49	53	57	56	45	70	56	60	60	45	102	46	31	54	57	26	50	49	60	87	55	52	45	28	46	60	60	60
ID579	LINE/L1	L1-2_BT	ACATGGACACACTGCTGTATTTAACATGGAGAACCAGCAAGG	0	12	16	14	28	10	28	29	1	15	21	16	10	20	35	24	18	25	8	25	22	14	14	83	86	18	11	21	36	31	6	9
ID580	LINE/L1	L1-2_BT	ACATGGACACACTGCTGTGTTTAACATGGAGAACCAGCAAGG	23	13	18	145	13	27	13	54	0	27	31	25	22	21	13	16	18	54	34	12	16	26	14	33	10	18	25	25	8	21	7	14
ID581	LINE/L1	L1-2_BT	ACATGGAGAACCAGCAAGGACCTGCTGGACAGCACAGGGAAC	40	32	34	139	21	15	34	48	0	55	45	37	39	33	51	4	29	27	20	29	40	35	33	122	122	31	12	35	40	38	32	20
ID582	LINE/L1	L1-2_BT	ACATGTACACACTGCTATATTTAAAATGGATAACCAACAAGG	88	81	68	60	60	85	90	68	53	73	74	80	91	57	108	63	58	68	67	27	82	43	65	108	69	78	47	64	69	109	71	98
ID583	LINE/L1	L1-2_BT	ACATGTATATGTATGGCTGAGTCCCTTTGCTGTTCACCTGAA	0	36	47	2	49	50	39	0	9	40	50	27	62	40	69	55	42	42	18	33	30	35	3	84	57	35	39	39	54	50	7	43
ID584	LINE/L1	L1-2_BT	ACATGTATCCATTCTCCCCCAAACTCCCCTCCCATCCAGGCT	0	108	122	0	0	139	140	0	119	110	112	126	0	107	207	110	75	114	126	56	93	77	142	179	103	110	94	80	126	148	130	147
ID585	LINE/L1	L1-2_BT	ACATTTAGGTTGCTTCCATGTCTTGGCTATTGTAAATAGTGC	53	37	39	47	28	48	42	41	51	39	57	33	38	27	58	31	27	41	48	20	43	30	56	67	43	36	23	22	39	40	44	45
ID586	LINE/L1	L1-2_BT	ACCAACAAGGACCTACTGTATAGCACAGGGAACTCTGCTCAA	77	56	40	67	39	39	77	57	58	71	51	54	64	48	71	45	46	57	65	23	50	35	70	97	38	56	50	43	59	71	77	68
ID587	LINE/L1	L1-2_BT	ACCAGCAAGGACCTGCTGGACAGCACAGGGAACTCTGCTCAA	0	26	35	183	16	19	25	59	1	50	34	44	24	23	45	2	32	21	12	20	44	27	49	123	49	25	18	30	34	24	33	20
ID588	LINE/L1	L1-2_BT	ACCAGCAAGGACCTGCTGGACAGCACAGGGAACTCTGCTCAG	21	13	10	3	4	4	12	2	0	9	16	1	9	19	1	0	8	8	10	7	9	14	0	3	156	11	3	7	9	16	0	7
ID589	LINE/L1	L1-2_BT	ACCAGGGGGAAGGATGGGGGAAGGGATAGTCAGGGAGTCTGG	12	7	6	231	4	12	9	51	4	7	3	7	5	16	4	7	30	19	8	3	16	10	30	4	86	4	5	17	10	7	21	2
ID590	LINE/L1	L1-2_BT	ACCATAAGGTTATTACAGAGTACTGAGCAGAGTTCCCTGTGC	6	2	6	0	3	2	1	0	0	0	10	0	0	4	1	0	1	10	0	2	2	0	0	4	135	6	0	1	2	3	0	0
ID591	LINE/L1	L1-2_BT	ACCATAAGGTTATTACAGAGTATTGAGCAGAGTTCCCTGTGC	33	18	22	88	22	21	22	16	0	8	43	3	30	0	44	7	17	29	10	11	30	13	22	105	23	25	4	18	16	28	1	11
ID592	LINE/L1	L1-2_BT	ACCTAAATGGGAAGGAAATCCAAAAAAGAGGGGATATATGTA	42	34	21	16	36	17	50	17	14	37	22	38	36	39	66	27	24	34	34	9	21	24	15	62	19	30	23	23	25	43	7	51
ID593	LINE/L1	L1-2_BT	ACCTACTGTATAGCACAGGGAACTCTACTCAATATTCTGTAA	18	15	13	25	11	4	13	24	9	12	14	26	21	11	26	8	11	10	12	1	9	9	23	30	22	15	13	8	13	18	12	17
ID594	LINE/L1	L1-2_BT	ACCTACTGTATAGCACAGGGAACTCTGCTCAATGTTATGTGG	38	28	27	51	31	17	46	35	37	31	30	29	19	20	36	28	20	32	21	13	17	20	34	57	24	27	27	11	35	51	45	44
ID595	LINE/L1	L1-2_BT	ACCTGAAACTAACACAACATTGTAAATCAACTATACTCCAAT	50	30	43	33	40	42	35	33	28	47	35	41	40	47	77	37	41	39	44	18	35	37	40	80	46	24	24	37	9	43	34	36
ID596	LINE/L1	L1-2_BT	ACCTGAAACTAACACAACATTGTAAATCAACTATACTTCAAT	35	10	28	29	29	29	27	22	20	22	16	30	30	18	53	28	25	29	24	10	18	16	31	46	38	11	12	19	14	39	25	27
ID597	LINE/L1	L1-2_BT	ACCTGAAACTATCACAACATTGTTAATTGGCTATACTCCAAT	26	19	34	19	28	37	25	22	18	30	27	23	33	27	33	28	19	19	26	12	24	18	12	35	23	20	21	14	33	23	24	25
ID598	LINE/L1	L1-2_BT	ACCTGCTGGACAGCACAGGGAACTCTGCTCAATACTCTGTAA	29	22	14	139	17	7	14	36	0	6	31	6	16	7	52	2	15	14	8	7	32	9	27	127	29	22	5	16	20	23	7	8
ID599	LINE/L1	L1-2_BT	ACCTGCTGGACAGCACAGGGAACTCTGCTCAGTACTCTGTAA	8	1	2	0	3	0	0	0	0	0	6	2	3	4	3	0	1	4	0	2	1	0	2	4	157	3	0	1	2	4	0	1
ID600	LINE/L1	L1-2_BT	ACCTTATGGTCACCAGGGGGAAGGATGGGGGAAGGGATAGTC	9	5	8	103	7	4	9	14	0	4	2	6	7	16	6	8	31	21	4	6	18	12	18	5	85	3	1	12	7	13	3	3
ID601	LINE/L1	L1-2_BT	ACTATATTCAATATCCTGTGATAAACCATAATGGAAAAGAAT	0	62	63	0	0	0	55	0	78	0	0	79	0	0	112	58	0	69	89	34	63	69	93	110	53	58	65	59	70	51	87	55
ID602	LINE/L1	L1-2_BT	ACTATTATATATAGAATGGATAAACAACAAGGTCCTACTGTA	0	4	9	0	0	11	8	0	5	8	4	8	0	7	18	8	5	7	11	2	4	7	13	21	6	5	10	5	6	7	9	9
ID603	LINE/L1	L1-2_BT	ACTATTTACAATAGCCAAGACATGGAAGCAACCTAAATGTCC	56	45	37	48	32	52	49	41	54	49	65	35	46	29	54	36	29	46	48	21	52	31	56	68	41	44	36	25	48	48	46	47
ID604	LINE/L1	L1-2_BT	ACTCAATATTCTGTAATAACCTATATGGGAAAAGAATCTGAA	0	15	17	0	0	0	18	0	13	0	0	15	0	23	21	13	0	10	24	7	14	14	14	15	19	13	14	17	16	21	8	14
ID605	LINE/L1	L1-2_BT	ACTCACAGACATAGAAAACAAACTTATGGTTACCAAAGGGGA	0	28	29	0	0	36	38	0	12	37	42	46	0	37	55	35	30	32	43	7	28	27	14	57	35	30	35	29	30	49	9	38
ID606	LINE/L1	L1-2_BT	ACTCAGCCATACATATACATGTATCCATTCTCCCCCAAACTC	112	89	96	49	91	106	82	53	70	101	105	84	69	75	130	90	44	76	84	43	81	42	57	139	76	81	59	44	94	93	83	88
ID607	LINE/L1	L1-2_BT	ACTCAGTGCTCTGTGGTGACCTAAATGGGAAGGAAATCCAAA	111	49	42	26	53	22	102	24	21	50	47	57	68	64	106	48	54	69	38	19	41	59	26	113	22	47	54	58	52	95	11	100
ID608	LINE/L1	L1-2_BT	ACTCCCCTCCCATCCAGGCTGCCACATAACATTGAGCAGAGT	152	120	107	126	112	121	147	124	113	106	118	132	123	72	203	122	70	115	105	65	83	73	129	195	95	117	81	59	129	153	137	139
ID609	LINE/L1	L1-2_BT	ACTCCCTGACTATCCCTTCCCCCATCCTTCCCCCTGGGAACC	8	8	9	30	13	11	5	20	1	12	24	10	12	10	39	11	8	12	16	7	11	7	9	57	46	7	5	4	4	3	2	2
ID610	LINE/L1	L1-2_BT	ACTCCCTGACTATCCCTTCCCCCATCCTTCCCCCTGGTGACC	0	8	9	0	0	0	9	0	4	7	0	8	0	18	5	8	30	27	7	5	19	13	29	7	88	4	5	15	8	13	25	4
ID611	LINE/L1	L1-2_BT	ACTCTACTCAGTGCTCTGTGGTGACCTAAATGGGAAGGAAAT	95	54	46	12	56	17	95	13	12	42	41	45	62	64	77	42	53	59	32	21	33	63	9	98	16	51	48	55	43	81	8	90
ID612	LINE/L1	L1-2_BT	ACTCTGCTCAATACTCTGTAATAACCTTATGGTCACCAGGGG	16	5	8	134	5	15	14	20	0	2	9	0	11	3	4	5	10	24	4	5	20	4	25	21	11	8	0	12	12	14	3	6
ID613	LINE/L1	L1-2_BT	ACTCTGCTCAGTACTCTGTAATAACCTTATGGTCACCAGGGG	3	0	1	0	0	0	0	0	0	0	1	0	0	1	0	0	0	8	0	0	1	0	0	0	84	5	1	0	0	1	0	0
ID614	LINE/L1	L1-2_BT	ACTCTGTAATAACCTTATGGTCACCAGGGGGAAGGATGGGGG	12	4	6	136	2	12	8	12	0	3	4	2	5	6	4	6	10	20	4	1	20	5	26	13	84	5	1	9	3	9	3	5
ID615	LINE/L1	L1-2_BT	ACTGAATCACTTTGCTGTACACCTGAAACTAACACAACATTG	60	38	55	1	59	44	52	1	3	65	53	44	58	40	94	60	36	62	69	28	34	41	3	105	53	37	31	41	1	60	9	57
ID616	LINE/L1	L1-2_BT	ACTGAGCAGAGTTCCCTGTGCTGTCCAGCAGGTCCTTGCTGG	21	14	10	3	4	5	12	2	0	10	17	1	9	23	0	0	9	9	10	8	9	14	0	3	155	11	4	8	9	15	0	7
ID617	LINE/L1	L1-2_BT	ACTGATTCACTTTGCTGTACAGCAGAAACTAACACAACATTG	33	17	19	1	17	23	23	1	3	26	15	22	24	21	40	17	9	20	26	8	19	17	1	37	27	12	9	16	12	32	1	23
ID618	LINE/L1	L1-2_BT	ACTGCTATATTTAAAATGGATAACCAACAAGGACCTACTGTA	89	69	57	69	59	71	88	58	73	65	46	70	98	67	103	62	58	76	58	30	60	49	64	114	60	62	47	62	75	87	77	86
ID619	LINE/L1	L1-2_BT	ACTGCTGTATTTAACATGGAGAACCAGCAAGGACCTGCTGGA	26	8	7	16	7	8	22	26	0	16	13	16	8	21	30	10	7	15	5	15	11	9	10	84	89	10	4	14	23	23	6	11
ID620	LINE/L1	L1-2_BT	ACTGCTGTGTTTAACATGGAGAACCAGCAAGGACCTGCTGGA	19	4	8	137	6	7	15	42	0	26	20	17	12	10	11	11	12	27	11	6	11	8	10	22	7	7	23	13	6	13	8	10
ID621	LINE/L1	L1-2_BT	ACTGTATAGCACAGGGAACTATATTCAATATCCTGTGATAAA	31	41	38	51	26	23	24	45	35	58	39	54	46	30	65	33	35	39	57	14	36	30	51	68	42	40	42	37	43	32	48	23
ID622	LINE/L1	L1-2_BT	ACTGTATAGCACAGGGAACTCTACTCAATATTCTGTAATAAC	15	13	11	16	7	4	11	16	11	4	9	14	16	9	17	7	7	9	6	3	5	7	11	23	11	11	8	5	8	13	6	17
ID623	LINE/L1	L1-2_BT	ACTGTATAGCACAGGGAACTCTGCTCAATGTTATGTGGCAGC	58	42	38	56	39	27	54	48	53	45	41	49	34	40	48	36	35	46	34	17	29	25	42	80	33	38	41	20	45	69	52	59
ID624	LINE/L1	L1-2_BT	ACTGTATAGCACATGGAACTCTGCTCAATGTTATGTGGCAGC	0	37	24	34	22	26	32	37	25	34	31	34	48	25	58	27	16	14	37	16	25	25	31	40	20	33	32	18	40	35	33	29
ID625	LINE/L1	L1-2_BT	ACTTATTTACAAAACAGAAACAGACTCACAGACATAGAAAAC	35	31	31	33	32	35	25	34	39	39	39	47	40	0	69	30	27	26	39	14	23	21	43	44	34	37	26	24	38	34	45	28
ID626	LINE/L1	L1-2_BT	ACTTTGCTGTACACCTGAAACTAACACAACATTGTAAATCAA	96	55	73	9	79	74	70	12	12	81	62	59	85	62	158	70	58	85	78	33	51	59	6	174	87	38	46	55	1	93	17	65
ID627	LINE/L1	L1-2_BT	ACTTTGCTGTACAGCAGAAACTAACACAACATTGTAAAGCAA	79	40	64	1	59	71	75	4	1	65	41	59	75	37	109	64	37	54	57	31	49	41	3	63	24	14	29	42	44	67	2	85
ID628	LINE/L1	L1-2_BT	ACTTTGCTGTACAGCAGAAACTAACACAACATTGTAAATCAA	0	17	24	0	0	22	32	0	3	29	19	30	0	21	55	18	16	31	30	7	22	19	1	53	33	18	10	16	14	39	2	28
ID629	LINE/L1	L1-2_BT	ACTTTGCTGTACAGCAGAAATTAACACAACATTGTAAATCAA	70	40	49	11	58	55	53	9	6	52	39	56	53	39	61	45	41	56	56	17	40	35	7	72	40	50	29	41	29	63	4	60
ID630	LINE/L1	L1-2_BT	AGAAACAGACTCACAGACATAGAAAACAAACTTATGGTTACC	35	22	24	17	18	18	19	17	14	29	26	32	29	22	40	21	27	19	23	4	21	22	23	36	24	22	22	26	26	29	21	20
ID631	LINE/L1	L1-2_BT	AGAAACTAACACAACATTGTAAAGCAACTATACTCCAATAAA	0	27	49	23	57	58	61	18	24	61	43	51	74	40	112	64	35	35	60	22	64	45	30	96	30	14	40	31	44	51	28	61
ID632	LINE/L1	L1-2_BT	AGAAACTAACACAACATTGTAAATCAACTATACTCCAATAAA	33	25	26	19	21	22	28	21	17	17	14	22	28	10	40	23	14	25	21	14	21	13	20	46	14	18	14	10	21	32	14	32
ID633	LINE/L1	L1-2_BT	AGAAAGACAAATACCATATGATATCACTTATATGTGGAATCT	0	27	43	49	0	60	47	0	55	50	40	56	48	40	67	51	37	42	44	24	29	33	67	76	40	39	37	38	50	72	58	56
ID634	LINE/L1	L1-2_BT	AGAAAGACAAATATCATATGATATCACTTATATGTGGAATCT	0	33	34	41	25	27	36	48	32	36	44	30	39	32	73	40	17	34	37	22	26	28	54	60	37	32	34	25	35	50	41	33
ID635	LINE/L1	L1-2_BT	AGAACCAGCAAGGACCTGCTGGACAGCACAGGGAACTCTGCT	43	48	50	186	27	24	42	60	1	57	52	45	45	43	51	2	35	28	23	35	52	46	50	131	208	45	19	39	46	47	37	27
ID636	LINE/L1	L1-2_BT	AGAATGGAATATTGACATTTGCAGCAACATGGAAGGTATACT	0	0	0	0	0	0	4	0	0	17	0	0	3	2	0	0	46	4	16	0	0	4	0	1	0	0	0	305	1	1	0	1
ID637	LINE/L1	L1-2_BT	AGAATGGATAAACAACAAGGTCCTACTGTATAGCACAGGGAA	26	17	18	36	18	20	17	28	32	24	15	24	34	24	44	20	26	19	30	10	12	20	48	53	13	16	23	22	25	22	38	17
ID638	LINE/L1	L1-2_BT	AGACTCACAGACATAGAAAACAAACTTATGGTTACCAAAGGG	47	38	34	14	35	38	37	11	12	45	45	49	47	40	68	40	32	33	52	10	32	31	13	68	41	37	38	33	32	47	12	37
ID639	LINE/L1	L1-2_BT	AGACTCCCTGACTATCCCTTCCCCCATCCTTCCCCCTGGGAA	3	5	5	31	11	7	2	19	0	9	20	7	8	7	23	9	8	12	11	7	8	7	7	46	45	5	6	4	2	1	1	1
ID640	LINE/L1	L1-2_BT	AGACTCCCTGACTATCCCTTCCCCCATCCTTCCCCCTGGTGA	12	7	6	230	4	11	9	52	4	7	2	7	4	17	4	7	30	21	7	3	15	11	30	4	87	4	5	18	9	7	21	2
ID641	LINE/L1	L1-2_BT	AGAGAAAGACAAATACCATATGATATCACTTATATGTGGAAT	0	19	37	49	39	51	40	53	47	40	39	43	38	38	62	41	31	35	36	19	22	37	64	66	39	26	35	34	39	56	59	50
ID642	LINE/L1	L1-2_BT	AGAGAAAGACAAATATCATATGATATCACTTATATGTGGAAT	44	32	33	44	24	23	36	42	36	36	42	33	45	39	66	44	18	34	39	21	24	29	60	59	34	33	31	26	32	48	44	28
ID643	LINE/L1	L1-2_BT	AGAGTTCCCTGTGCTATACAGTAGGTCCTTGTTGGTTATCCA	75	55	33	63	38	36	71	60	44	51	38	53	54	0	76	40	42	71	48	19	46	38	64	101	39	51	38	37	58	82	64	76
ID644	LINE/L1	L1-2_BT	AGAGTTCCCTGTGCTATACAGTAGGTCCTTGTTGGTTATCTA	31	26	23	28	19	18	23	27	23	32	19	22	34	18	25	16	21	10	27	10	15	13	27	36	13	24	17	18	30	27	37	25
ID645	LINE/L1	L1-2_BT	AGAGTTCCCTGTGCTGTCCAGCAGGTCCTTGCTGGTTCTCCA	42	33	35	188	23	20	38	64	0	54	47	44	39	33	54	2	28	26	20	30	44	40	46	126	201	34	13	35	40	43	40	22
ID646	LINE/L1	L1-2_BT	AGATAACTAATGAGAACCTACTGTATAGCACAGGGAACTCTA	43	21	24	29	16	17	34	30	24	20	3	26	34	23	11	10	26	22	27	4	12	13	9	13	12	22	12	24	19	26	23	29
ID647	LINE/L1	L1-2_BT	AGATGCAAACTATTATATATAGAATGGATAAACAACAAGGTC	5	2	9	13	9	11	9	14	15	9	10	16	17	5	18	10	4	6	8	3	9	9	21	18	8	3	14	4	16	6	18	10
ID648	LINE/L1	L1-2_BT	AGATGCTCAACATCACTAATTATTAGAGAAATGCAAATCAAA	0	77	90	101	74	69	87	85	83	78	94	80	75	76	128	89	58	100	79	40	70	61	105	127	75	78	58	63	82	97	90	87
ID649	LINE/L1	L1-2_BT	AGATTCTTTTCCCATATAGGTTATTACAGAATATTGAGTAGA	18	13	15	12	11	11	16	11	8	18	16	14	9	0	22	13	10	9	22	5	13	12	11	15	14	12	15	13	14	17	5	12
ID650	LINE/L1	L1-2_BT	AGCAAAGGGACTCAGCCATACATATACATGTATCCATTCTCC	98	82	95	30	84	107	88	32	59	88	107	80	88	70	133	82	59	76	75	43	73	60	41	137	70	74	62	60	94	83	63	92
ID651	LINE/L1	L1-2_BT	AGCAAGGACCTGCTGGACAGCACAGGGAACTCTGCTCAATAC	11	17	14	163	11	4	12	39	0	12	39	9	12	6	35	2	11	13	7	10	30	8	27	102	27	16	4	15	20	19	31	9
ID652	LINE/L1	L1-2_BT	AGCAAGGACCTGCTGGACAGCACAGGGAACTCTGCTCAGTAC	5	1	2	0	2	0	0	0	0	1	8	0	3	0	0	0	1	3	0	2	1	1	0	3	143	2	0	1	3	3	0	1
ID653	LINE/L1	L1-2_BT	AGCACAGGGAACTATATTCAATATCCTGTGATAAACCATAAT	48	58	50	52	47	38	33	52	54	74	64	64	65	44	76	48	42	55	75	26	40	48	71	89	53	56	40	43	47	43	58	35
ID654	LINE/L1	L1-2_BT	AGCACAGGGAACTCTACTCAATATTCTGTAATAACCTATATG	0	11	7	15	0	4	12	0	6	6	13	13	9	13	20	5	5	12	15	2	8	8	8	18	14	11	3	6	8	13	4	13
ID655	LINE/L1	L1-2_BT	AGCACAGGGAACTCTACTCAGTGCTCTGTGGTGACCTAAATG	72	36	31	15	23	14	74	14	7	24	24	38	46	48	62	24	35	38	22	10	20	44	14	60	22	37	31	38	24	65	3	66
ID656	LINE/L1	L1-2_BT	AGCACAGGGAACTCTGCTCAATACTCTGTAATAACCTTATGG	33	18	22	88	22	21	22	17	0	8	43	3	29	6	46	7	17	29	9	12	30	12	20	105	23	26	4	19	16	28	1	11
ID657	LINE/L1	L1-2_BT	AGCACAGGGAACTCTGCTCAATGTTATGTGGCAGCCTGGATG	135	82	81	90	79	89	139	97	98	80	88	102	87	74	155	71	78	100	68	42	67	54	93	136	67	71	73	53	94	130	98	127
ID658	LINE/L1	L1-2_BT	AGCACAGGGAACTCTGCTCAGTACTCTGTAATAACCTTATGG	6	2	6	0	3	2	1	0	0	0	8	2	0	4	1	0	1	10	0	2	2	0	0	4	136	6	0	1	2	4	0	0
ID659	LINE/L1	L1-2_BT	AGCACATGGAACTCTGCTCAATGTTATGTGGCAGCCTGGATG	58	44	41	51	43	47	60	49	41	62	50	51	56	48	90	50	27	45	54	23	49	44	50	77	54	46	43	30	46	58	52	62
ID660	LINE/L1	L1-2_BT	AGCACTATTTACAATAGCCAAGACATGGAAGCAACCTAAATG	61	36	36	47	25	53	46	40	49	40	58	39	40	30	60	27	31	46	51	21	45	33	57	66	47	37	26	27	43	46	50	48
ID661	LINE/L1	L1-2_BT	AGCAGAAACTAACACAACATTGTAAAGCAACTATACTCCAAT	48	23	37	10	40	40	44	9	14	46	29	49	49	30	84	44	23	29	38	17	37	36	10	80	32	14	28	23	33	38	14	46
ID662	LINE/L1	L1-2_BT	AGCAGAGTTCCCTGTGCTATACAGTAGGTCCTTGTTGGTTAT	0	68	41	0	0	0	84	0	61	74	0	65	0	69	83	42	0	78	75	22	53	44	82	125	47	65	50	54	67	93	84	85
ID663	LINE/L1	L1-2_BT	AGCAGGTCCTTGCTGGTTCTCCATGTTAAACACAGCAGTGTG	0	9	15	149	14	32	15	55	2	26	33	26	22	23	17	18	16	55	25	11	14	29	11	31	7	16	24	27	12	22	8	12
ID664	LINE/L1	L1-2_BT	AGCAGGTCCTTGCTGGTTCTCCATGTTAAATACAGCAGTGTG	36	16	16	18	30	16	32	29	1	22	22	19	10	0	37	31	16	28	9	26	21	13	14	90	89	22	11	24	39	31	7	11
ID665	LINE/L1	L1-2_BT	AGCAGTGTGTACATGTCCATCCCAAACTCCCTAACTATCCCT	65	47	43	44	46	56	59	39	38	50	54	45	50	0	85	43	49	40	52	29	36	31	55	60	38	42	41	40	37	67	44	53
ID666	LINE/L1	L1-2_BT	AGCAGTGTGTCCATGTCCATCCCAGACTCCCTGACTATCCCT	27	18	40	182	31	22	24	93	1	33	31	41	32	35	30	25	45	51	28	19	45	28	51	70	152	22	23	40	31	25	8	19
ID667	LINE/L1	L1-2_BT	AGCCATACATATACATGTATCCATTCTCCCCCAAACTCCCCT	95	66	66	33	71	92	77	38	58	78	78	73	58	57	114	64	42	66	73	34	59	40	45	104	74	67	51	43	66	85	70	83
ID668	LINE/L1	L1-2_BT	AGGACCTACTGTATAGCACAGGGAACTCTACTCAATATTCTG	21	19	13	25	12	3	22	25	7	11	16	23	17	11	22	8	13	14	13	2	12	8	24	32	18	15	14	14	13	19	13	24
ID669	LINE/L1	L1-2_BT	AGGACCTACTGTATAGCACAGGGAACTCTGCTCAATGTTATG	0	32	26	56	30	16	52	42	40	36	30	29	34	0	47	27	22	39	30	14	27	19	34	56	24	29	31	19	35	58	43	53
ID670	LINE/L1	L1-2_BT	AGGACCTGCTGGACAGCACAGGGAACTCTGCTCAATACTCTG	23	24	16	163	14	6	17	44	0	7	35	8	17	7	54	2	16	14	7	7	33	10	27	132	31	22	4	16	22	19	32	12
ID671	LINE/L1	L1-2_BT	AGGACCTGCTGGACAGCACAGGGAACTCTGCTCAGTACTCTG	9	1	3	0	3	0	0	0	0	0	6	2	3	4	4	0	1	4	0	2	1	1	2	4	160	3	0	2	2	4	0	1
ID672	LINE/L1	L1-2_BT	AGGATGGGGGAAGGGATAGTCAGGGAGTCTGGGATGGACATG	0	15	23	0	0	24	18	0	6	25	18	14	0	31	24	17	52	45	19	16	30	24	57	58	168	17	12	34	14	17	28	9
ID673	LINE/L1	L1-2_BT	AGGCTGCCACATAACATTGAGCAGAGTTCCATGTGCTATACA	0	40	29	0	0	34	40	0	30	34	38	51	0	25	71	37	21	23	44	19	33	31	40	55	24	37	36	18	40	49	32	38
ID674	LINE/L1	L1-2_BT	AGGCTGCCACATAACATTGAGCAGAGTTCCCTGTGCTATACA	0	46	40	0	0	0	70	0	52	52	0	54	0	45	65	38	0	60	47	18	40	25	52	95	40	40	50	23	50	81	55	71
ID675	LINE/L1	L1-2_BT	AGGGAACTATATTCAATATCCTGTGATAAACCATAATGGAAA	57	69	67	71	55	45	40	63	71	84	71	70	78	0	88	52	52	69	83	28	55	62	88	98	53	68	53	53	56	48	71	42
ID676	LINE/L1	L1-2_BT	AGGGAACTCTACTCAGTGCTCTGTGGTGACCTAAATGGGAAG	83	45	36	17	37	14	80	14	7	30	30	45	47	43	70	33	43	51	26	11	24	55	14	78	20	44	36	40	37	69	5	78
ID677	LINE/L1	L1-2_BT	AGGGAACTCTGCTCAATACTCTGTAATAACCTTATGGTCACC	17	7	8	119	4	13	11	20	1	2	7	0	10	2	7	2	9	21	2	4	19	4	27	18	11	9	0	12	12	15	4	6
ID678	LINE/L1	L1-2_BT	AGGGAACTCTGCTCAATGTTATGTGGCAGCCTGGATGGGAGG	0	83	76	85	0	91	118	0	82	67	72	90	83	65	141	84	59	79	70	44	63	55	84	134	55	76	67	45	98	121	90	113
ID679	LINE/L1	L1-2_BT	AGGGACTCAGCCATACATATACATGTATCCATTCTCCCCCAA	134	107	112	72	103	120	110	77	96	117	130	103	91	0	183	111	51	87	100	49	95	68	83	180	93	92	86	51	117	122	102	118
ID680	LINE/L1	L1-2_BT	AGGGAGTCTGGGATGGACATGGACACACTGCTGTATTTAACA	28	16	12	7	13	11	20	33	1	17	16	20	19	13	29	10	24	26	15	9	19	15	10	77	98	16	20	14	23	24	3	12
ID681	LINE/L1	L1-2_BT	AGGGAGTCTGGGATGGACATGGACACACTGCTGTGTTTAACA	18	11	11	150	14	27	9	63	0	32	24	30	19	26	12	13	21	43	29	11	27	24	11	30	8	16	24	20	6	14	7	11
ID682	LINE/L1	L1-2_BT	AGGGAGTTTGGGATGGACATGTACACACTGCTATATTTAAAA	76	55	59	55	54	76	68	64	51	63	50	59	72	52	82	53	38	64	64	22	53	49	65	94	71	55	56	52	58	75	61	71
ID683	LINE/L1	L1-2_BT	AGGGGGAAGGATGGGGGAAGGGATAGTCAGGGAGTCTGGGAT	14	11	10	287	26	28	12	108	5	20	14	13	17	23	29	17	50	34	21	10	26	21	40	53	153	10	12	29	15	8	23	5
ID684	LINE/L1	L1-2_BT	AGGTCCTACTGTATAGCACAGGGAACTATATTCAATATCCTG	21	38	36	46	26	21	15	42	42	42	43	54	45	37	59	33	35	39	50	9	38	23	55	63	45	41	33	33	31	28	57	16
ID685	LINE/L1	L1-2_BT	AGGTCCTTGCTGGTTCTCCATGTTAAACACAGCAGTGTGTCC	29	9	17	148	14	30	16	51	0	24	34	27	23	23	17	16	19	58	26	10	12	31	13	33	10	15	26	30	10	22	7	12
ID686	LINE/L1	L1-2_BT	AGGTCCTTGCTGGTTCTCCATGTTAAATACAGCAGTGTGTCC	38	15	19	18	29	15	31	28	1	21	22	16	10	0	37	29	17	25	8	25	22	13	15	91	90	20	12	23	39	29	7	11
ID687	LINE/L1	L1-2_BT	AGGTCCTTGTTGGTTATCCATTTTAAATATAGCAGTGTGTAC	120	92	83	82	82	99	111	84	89	89	71	89	108	64	135	81	69	90	79	37	78	55	82	126	83	92	58	79	89	121	95	109
ID688	LINE/L1	L1-2_BT	AGGTGAACAGCAAAGGGACTCAGCCATACATATACATGTATC	0	33	41	0	0	0	38	0	12	42	0	29	0	41	57	48	34	40	18	30	24	30	7	69	48	33	39	36	50	47	13	44
ID689	LINE/L1	L1-2_BT	AGGTGAACAGTGAAGGGACTCAGCCATACATATACATGTATC	44	37	44	8	50	48	36	11	18	48	57	43	41	58	69	47	12	43	67	24	50	32	16	76	52	45	43	10	52	33	22	30
ID690	LINE/L1	L1-2_BT	AGGTTATTACAGAATATTGAGTAGAGTTCCCTGTGCTATACA	13	13	13	19	8	8	10	18	11	9	11	17	16	11	21	9	8	15	13	5	8	6	13	26	13	12	10	5	9	13	5	16
ID691	LINE/L1	L1-2_BT	AGGTTATTACAGAGTATTGAGCAGAGTTCCCTGTGCTGTCCA	21	21	13	148	12	10	13	42	0	5	24	4	11	5	48	2	8	13	7	7	24	7	27	115	25	21	4	9	14	19	8	6
ID692	LINE/L1	L1-2_BT	AGTACTGAGCAGAGTTCCCTGTGCTGTCCAGCAGGTCCTTGC	5	1	2	0	2	0	0	0	0	1	8	0	3	3	0	0	1	3	0	2	1	1	0	3	144	2	0	1	3	3	0	1
ID693	LINE/L1	L1-2_BT	AGTAGAGTTCCCTGTGCTATACAGTAGGTTCTCATTAGTTAT	40	22	23	28	17	19	35	25	26	19	0	30	41	30	25	13	22	30	27	7	15	20	14	22	16	24	16	27	23	28	17	32
ID694	LINE/L1	L1-2_BT	AGTAGGTCCTTGTTGGTTATCCATTTTAAATATAGCAGTGTG	0	83	74	77	81	87	107	72	82	74	59	82	110	0	121	81	69	88	68	39	80	56	75	119	83	76	56	70	79	112	97	101
ID695	LINE/L1	L1-2_BT	AGTATAGTTGATTTACAATGTTGTGTTAGTTTCAGGTGTACA	63	27	55	24	49	50	54	20	19	51	30	40	45	38	96	49	46	56	51	23	31	27	10	104	55	20	23	39	0	49	14	50
ID696	LINE/L1	L1-2_BT	AGTATAGTTGCTTTACAATGTTGTGTTAGTTTCTGCTGTACA	45	24	35	0	36	37	49	3	1	42	27	55	45	27	76	37	24	30	44	16	42	29	3	65	19	12	22	18	24	38	2	53
ID697	LINE/L1	L1-2_BT	AGTATTGAGCAGAGTTCCCTGTGCTGTCCAGCAGGTCCTTGC	12	17	14	163	11	4	12	42	0	10	39	10	12	6	34	1	11	12	7	10	31	8	28	101	27	16	3	15	20	19	30	10
ID698	LINE/L1	L1-2_BT	AGTCCCTTTGCTGTCCACCTGAAACTATCACAACATTGTTAA	97	63	81	29	63	100	76	31	31	74	94	95	95	75	101	79	47	68	82	43	71	58	38	120	82	57	57	3	92	81	38	80
ID699	LINE/L1	L1-2_BT	AGTCCCTTTGCTGTTCACCTGAAACTATCACAACATTGTTAA	44	39	56	5	41	64	45	8	10	60	72	38	76	69	78	62	77	48	31	35	44	45	10	76	41	38	49	61	54	50	10	38
ID700	LINE/L1	L1-2_BT	AGTCTGGGATGGACATGGACACACTGCTGTATTTAACATGGA	0	10	10	0	0	0	19	0	1	0	0	19	0	16	27	8	0	22	7	7	17	15	10	74	93	12	14	15	16	27	4	9
ID701	LINE/L1	L1-2_BT	AGTCTGGGATGGACATGGACACACTGCTGTGTTTAACATGGA	17	8	12	148	14	24	9	49	0	26	22	24	19	26	11	11	15	42	29	9	19	16	12	30	9	14	23	16	5	12	6	9
ID702	LINE/L1	L1-2_BT	AGTGCTCTGTGGTGACCTAAATGGGAAGGAAATCCAAAAAAG	0	36	31	0	0	15	71	0	15	40	30	44	0	38	74	33	32	43	37	14	31	35	16	74	12	32	40	38	43	67	9	72
ID703	LINE/L1	L1-2_BT	AGTGTGTCCATGTCCATCCCAGACTCCCTGACTATCCCTTCC	27	15	40	176	34	25	22	78	1	30	23	36	32	30	29	23	45	54	24	17	42	29	48	69	147	22	20	34	30	21	5	18
ID704	LINE/L1	L1-2_BT	AGTTCATTTGTATCATTTCTTTTTAGATTCCACATATAAGGG	74	48	46	62	43	45	62	65	51	62	54	57	55	39	89	50	37	65	64	23	44	38	65	90	44	44	40	38	51	70	59	56
ID705	LINE/L1	L1-2_BT	AGTTCCCTGTGCTGTCCAGCAGGTCCTTGCTGGTTCTCCATG	42	34	35	183	23	18	37	60	0	55	47	43	38	30	52	2	24	27	21	30	41	37	44	123	191	32	12	34	40	39	36	21
ID706	LINE/L1	L1-2_BT	AGTTGATTTACAATGTTGTGTTAGTTTCAGGTGTACAGCAAA	99	50	71	11	73	76	75	11	9	78	56	52	80	64	154	69	59	83	79	27	47	60	8	169	97	35	40	58	0	87	18	68
ID707	LINE/L1	L1-2_BT	AGTTGATTTACAATGTTGTGTTAGTTTCAGGTGTATAGCAAA	12	13	27	36	23	29	18	41	35	28	22	19	32	20	30	19	17	16	22	10	25	16	42	29	25	13	16	17	7	19	29	20
ID708	LINE/L1	L1-2_BT	AGTTGCTTTACAATGTTGTGTTAGTTTCTGCTGTACAGCAAA	0	39	63	0	0	74	64	0	2	57	39	56	0	0	103	60	41	51	46	26	47	40	3	64	25	18	33	39	43	51	2	70
ID709	LINE/L1	L1-2_BT	AGTTTCAGGTGAACAGCAAAGGGACTCAGCCATACATATACA	46	27	58	6	55	51	40	4	12	50	57	32	66	0	70	61	45	42	27	38	29	40	7	78	62	34	44	47	55	44	5	42
ID710	LINE/L1	L1-2_BT	AGTTTGGGATGGACATGTACACACTGCTATATTTAAAATGGA	65	49	41	46	44	60	61	45	42	64	47	66	72	47	89	46	42	62	62	17	53	46	48	98	63	49	44	48	53	78	47	63
ID711	LINE/L1	L1-2_BT	AGTTTGGGATTAACATATACACACTACTATATATAAAATAGA	22	12	12	11	12	18	12	11	13	17	14	14	15	14	24	10	5	11	17	6	15	6	12	27	11	9	4	8	10	18	16	15
ID712	LINE/L1	L1-2_BT	AGTTTGGGGGAGAATGGATACATGTATATGTATGGCTGAGTC	106	84	93	47	84	97	84	52	77	95	95	74	63	67	135	92	38	67	76	45	75	39	56	142	80	74	65	43	93	93	82	90
ID713	LINE/L1	L1-2_BT	AGTTTGTTTTCTATGTCTGTGAGTCTGTTTCTGTTTTGTAAA	0	22	20	0	0	0	23	0	18	0	0	43	0	22	53	20	0	19	35	15	19	19	25	34	30	27	23	17	27	23	20	24
ID714	LINE/L1	L1-2_BT	AGTTTTGATTTGCATTTCTCTAATAATTAGTGATGTTGAGCA	0	61	71	82	65	56	69	72	78	64	76	76	63	56	107	70	45	75	60	31	60	51	96	111	75	62	45	47	64	79	78	75
ID715	LINE/L1	L1-2_BT	ATAAAATAGATAAACAACAAGGACCTACTGTATAGCACAGGG	8	10	10	10	3	10	4	10	10	6	7	2	19	11	16	9	10	9	11	5	6	7	15	19	15	10	12	11	11	9	6	4
ID716	LINE/L1	L1-2_BT	ATAACCTTATGGTCACCAGGGGGAAGGATGGGGGAAGGGATA	18	7	12	108	7	6	15	12	0	3	4	5	8	15	5	10	33	16	5	9	22	11	21	8	81	4	1	9	4	12	4	4
ID717	LINE/L1	L1-2_BT	ATAACTGAATCACTTTGCTGTACACCTGAAACTAACACAACA	0	26	44	2	0	40	39	0	5	51	46	41	46	27	102	54	34	57	60	24	29	35	4	115	65	25	34	31	1	57	10	50
ID718	LINE/L1	L1-2_BT	ATAACTGATTCACTTTGCTGTACAGCAGAAACTAACACAACA	0	18	25	1	24	28	20	0	2	21	20	23	29	22	36	21	11	24	26	11	18	17	3	39	18	15	7	18	10	36	2	22
ID719	LINE/L1	L1-2_BT	ATACAAATGAACTTATTTACAAAACAGAAACAGACTCACAGA	0	68	84	0	0	79	69	0	81	72	92	88	0	0	141	86	81	66	98	47	70	73	104	153	78	85	68	78	98	77	91	69
ID720	LINE/L1	L1-2_BT	ATACAAATGAACTTATTTACAAAACAGAAATAGACTCACAGA	60	27	42	39	36	46	41	39	42	38	47	51	47	24	65	33	25	35	45	17	27	36	54	57	37	30	30	30	36	54	54	43
ID721	LINE/L1	L1-2_BT	ATACAGCAGTGTGTCCATGTCCATCCCAGACTCCCTGACTAT	16	9	17	15	12	5	15	32	1	16	16	14	15	10	26	11	17	22	16	11	20	11	19	51	132	9	10	18	25	15	2	8
ID722	LINE/L1	L1-2_BT	ATACAGTAGGACCTTGTTGTTTATCCATTCTATATATAATAG	10	5	10	12	6	14	8	7	3	9	6	7	12	4	16	9	4	5	12	2	8	6	16	21	7	6	11	3	8	6	9	9
ID723	LINE/L1	L1-2_BT	ATACAGTAGGTCCTTGTTGGTTATCCATTTTAAATATAGCAG	0	62	52	64	57	62	75	58	64	58	51	56	90	56	87	55	53	60	55	27	61	47	63	100	56	57	48	58	62	75	79	77
ID724	LINE/L1	L1-2_BT	ATACATATACATGTATCCATTCTCCCCCAAACTCCCCTCCCA	0	58	64	0	0	0	76	0	62	80	0	66	0	51	125	63	37	65	72	34	40	44	61	112	81	56	44	42	71	84	73	82
ID725	LINE/L1	L1-2_BT	ATACATATATCCCCTCTTTTTTGGATTTCCTTCCCATTTAGG	41	29	17	12	29	14	46	14	11	30	17	31	32	30	58	22	21	30	26	8	22	20	12	48	16	27	22	20	21	44	8	44
ID726	LINE/L1	L1-2_BT	ATACATGTATATGTATGGCTGAGTCCCTTCACTGTTCACCTG	46	38	41	8	49	45	32	11	18	48	57	43	43	58	69	51	12	40	62	24	51	31	14	71	52	41	43	10	52	32	20	29
ID727	LINE/L1	L1-2_BT	ATACATGTATATGTATGGCTGAGTCCCTTTGCTGTTCACCTG	0	35	43	0	0	57	37	0	9	40	43	27	61	0	62	53	35	37	18	33	28	34	5	75	52	34	39	38	50	49	8	42
ID728	LINE/L1	L1-2_BT	ATACATGTATCCATTCTCCCCCAAACTCCCCTCCCATCCAGG	136	94	95	102	101	112	108	93	99	95	98	92	82	75	181	90	52	94	100	48	66	61	102	147	87	96	76	53	104	112	106	114
ID729	LINE/L1	L1-2_BT	ATACTCTGTAATAACCTTATGGTCACCAGGGGGAAGGATGGG	0	4	5	138	2	13	9	0	0	2	4	2	5	5	3	6	10	20	5	2	20	2	28	13	10	8	0	9	3	10	3	5
ID730	LINE/L1	L1-2_BT	ATAGAATGGATAAACAACAAGGTCCTACTGTATAGCACAGGG	11	8	10	23	7	13	5	16	19	16	11	16	22	17	27	8	14	9	17	4	8	13	25	26	7	8	12	13	14	7	16	6
ID731	LINE/L1	L1-2_BT	ATAGCACAGGGAACTATATTCAATATCCTGTGATAAACCATA	26	47	37	50	38	30	25	43	48	64	53	59	48	33	74	36	34	44	61	20	36	34	65	66	42	43	34	34	37	28	51	29
ID732	LINE/L1	L1-2_BT	ATAGCACAGGGAACTCTACTCAATATTCTGTAATAACCTATA	15	10	6	14	5	5	10	10	8	4	15	12	10	0	25	4	6	13	11	1	6	8	10	23	12	10	5	6	11	13	2	13
ID733	LINE/L1	L1-2_BT	ATAGCACAGGGAACTCTGCTCAATGTTATGTGGCAGCCTGGA	90	48	53	63	50	39	77	70	71	65	59	67	53	49	94	48	53	72	55	23	48	39	76	98	48	46	58	33	56	90	73	77
ID734	LINE/L1	L1-2_BT	ATAGCACATGGAACTCTGCTCAATGTTATGTGGCAGCCTGGA	48	37	33	55	33	37	39	44	33	47	47	64	43	33	84	42	24	30	43	18	48	38	50	65	28	38	41	24	38	47	42	40
ID735	LINE/L1	L1-2_BT	ATAGCAGTGTGTACATGTCCATCCCAAACTCCCTAACTATCC	48	33	33	33	37	48	46	36	30	37	34	42	37	27	72	30	27	29	41	20	32	24	46	53	30	29	33	33	28	50	43	44
ID736	LINE/L1	L1-2_BT	ATAGGTTATTACAGAATATTGAGTAGAGTTCCCTGTGCTATA	0	9	6	16	6	4	11	12	8	4	14	13	8	12	22	5	4	15	9	2	6	6	12	22	10	9	5	3	9	11	2	15
ID737	LINE/L1	L1-2_BT	ATAGTTAGGGAGTTTGGGATGGACATGTACACACTGCTATAT	53	39	37	40	38	59	46	45	34	43	44	49	50	31	81	32	29	40	50	20	36	33	47	65	33	34	33	42	37	55	39	44
ID738	LINE/L1	L1-2_BT	ATAGTTCCCTGTGCTATACAGTAGGACCTTGTTGTTTATCCA	0	46	40	0	0	0	23	0	42	40	0	32	0	32	80	42	42	30	55	21	16	36	54	79	32	48	36	40	56	32	48	22
ID739	LINE/L1	L1-2_BT	ATAGTTGATTTACAATGTTGTGTTAGTTTCAGGTGTACAGCA	82	38	66	11	68	61	67	12	8	58	48	42	69	56	125	63	54	61	62	24	40	44	4	139	78	31	24	49	0	72	16	61
ID740	LINE/L1	L1-2_BT	ATAGTTGCTTTACAATGTTGTGTTAGTTTCTGCTGTACAGCA	0	28	45	0	0	0	55	0	2	46	23	46	0	29	87	43	33	43	38	21	36	27	3	52	16	14	22	27	28	36	2	63
ID741	LINE/L1	L1-2_BT	ATAGTTTCAGGTGAACAGCAAAGGGACTCAGCCATACATATA	36	24	53	3	44	48	32	5	13	52	49	26	62	37	65	48	39	41	20	35	24	36	6	76	46	30	35	34	47	39	7	35
ID742	LINE/L1	L1-2_BT	ATATAAAATAGATAAACAACAAGGACCTACTGTATAGCACAG	13	11	13	17	5	8	3	18	9	13	10	3	16	9	18	10	9	9	10	8	4	5	16	25	14	9	16	14	15	13	14	5
ID743	LINE/L1	L1-2_BT	ATATACATATATCCCCTCTTTTTTGGATTTCCTTCCCATTTA	0	10	5	0	0	0	14	0	8	10	0	10	0	6	19	7	5	10	11	3	14	4	1	16	9	8	16	5	7	11	5	13
ID744	LINE/L1	L1-2_BT	ATATACATGTATCCATTCTCCCCCAAACTCCCCTCCCATCCA	122	83	82	79	85	97	83	74	87	84	85	92	71	64	171	76	43	82	91	46	57	53	94	133	87	82	71	46	91	99	91	86
ID745	LINE/L1	L1-2_BT	ATATAGTTCCCTGTGCTATACAGTAGGACCTTGTTGTTTATC	36	61	50	56	47	47	26	44	49	47	40	44	76	30	90	48	47	36	69	23	17	42	58	92	39	61	46	38	71	34	62	26
ID746	LINE/L1	L1-2_BT	ATATATAGAATGGATAAACAACAAGGTCCTACTGTATAGCAC	13	7	13	13	9	20	10	9	12	17	14	11	20	11	19	10	7	6	21	5	6	10	17	19	8	8	14	9	11	8	14	11
ID747	LINE/L1	L1-2_BT	ATATATCCCCTCTTTTTTGGATTTCCTTCCCATTTAGGTCAC	54	35	30	24	45	15	57	23	20	48	26	47	36	47	74	33	28	38	45	14	31	31	19	61	13	34	29	31	29	48	13	65
ID748	LINE/L1	L1-2_BT	ATATCCCCTCTTTTTTGGATTTCCTTCCCATTTAGGTCACCA	62	38	28	16	41	15	61	17	22	50	34	45	29	47	70	33	36	46	47	14	38	36	17	67	14	37	36	43	39	48	13	72
ID749	LINE/L1	L1-2_BT	ATATGATATCACTTATATGTGGAATCTAAAATATGACACAAA	49	20	29	32	27	31	30	42	45	40	40	37	26	33	73	27	24	26	37	15	29	27	58	71	39	27	34	30	27	49	46	31
ID750	LINE/L1	L1-2_BT	ATATGTATGGCTGAGTCCCTTTGCTGTTCACCTGAAACTATC	37	20	47	2	45	48	34	4	12	47	45	25	61	39	66	49	38	40	18	33	21	34	5	80	43	24	40	30	45	40	5	36
ID751	LINE/L1	L1-2_BT	ATATTCAATATCCTGTGATAAACCATAATGGAAAAGAATATG	0	49	45	56	53	43	39	0	50	54	62	55	58	36	81	45	36	41	68	26	45	50	66	82	45	47	50	36	51	43	53	33
ID752	LINE/L1	L1-2_BT	ATATTCTGTAATAACCTATATGGGAAAAGAATCTGAAAAAGA	20	12	13	11	13	15	17	15	11	20	12	13	6	18	21	13	12	14	17	4	11	14	9	19	16	11	10	17	10	18	11	14
ID753	LINE/L1	L1-2_BT	ATATTCTTTTCCATTATGGTTTATCACAGGATATTGAATATA	63	68	74	86	80	55	58	69	82	89	92	77	82	59	120	66	60	63	89	44	58	66	96	108	62	70	67	61	77	58	88	54
ID754	LINE/L1	L1-2_BT	ATATTGACATTTGCAGCAACATGGAAGGTATACTATTAAGTA	0	0	0	0	0	1	0	0	0	18	1	0	0	3	0	0	50	1	20	0	0	4	0	1	0	0	0	302	0	1	0	0
ID755	LINE/L1	L1-2_BT	ATATTTAAAATGGATAACCAACAAGGACCTACTGTATAGCAC	0	56	45	0	0	64	84	0	61	59	45	59	0	69	99	56	62	57	55	23	63	48	71	134	52	55	46	55	55	85	78	87
ID756	LINE/L1	L1-2_BT	ATCACAGGATATTGAATATAGTTCCCTGTGCTATACAGTAGG	22	40	36	35	22	17	16	28	30	45	36	46	45	29	57	29	32	34	45	10	36	26	42	56	36	41	36	31	39	25	42	16
ID757	LINE/L1	L1-2_BT	ATCCAGGCTGCCACATAACATTGAGCAGAGTTCCATGTGCTA	0	41	35	54	39	38	48	44	36	49	49	54	45	40	82	48	27	38	49	18	49	39	53	73	39	41	42	28	40	55	47	47
ID758	LINE/L1	L1-2_BT	ATCCAGGCTGCCACATAACATTGAGCAGAGTTCCCTGTGCTA	0	61	65	0	0	0	89	0	79	74	0	74	0	63	107	61	56	80	66	35	61	47	79	101	54	58	69	38	68	94	78	86
ID759	LINE/L1	L1-2_BT	ATCCATTCTCCCCCAAACTCCCCTCCCATCCAGGCTGCCACA	192	129	132	128	138	132	154	136	131	125	119	162	110	120	212	111	113	119	119	63	88	87	151	200	132	133	106	86	133	143	129	159
ID760	LINE/L1	L1-2_BT	ATCCATTTTAAATATAGCAGTGTGTACATGTCCATCCCAAAC	68	45	37	48	40	59	63	46	40	56	46	64	68	43	83	44	39	63	59	17	47	43	50	94	59	44	42	46	50	80	48	64
ID761	LINE/L1	L1-2_BT	ATCCCCTCTTTTTTGGATTTCCTTCCCATTTAGGTCACCACA	0	42	35	0	0	13	65	0	21	42	35	44	0	43	66	39	35	42	45	19	34	44	22	65	10	40	39	40	43	55	16	74
ID762	LINE/L1	L1-2_BT	ATCCCTTATATGTGGAATCTAAAAAGAAATGATACAAATGAA	81	47	49	65	42	51	70	65	52	61	57	61	57	43	97	52	42	68	58	28	53	43	68	98	46	41	44	46	52	74	64	66
ID763	LINE/L1	L1-2_BT	ATCCTTCCCCCTGGTGACCATAAGGTTATTACAGAGTATTGA	15	5	6	139	2	13	10	18	0	3	5	2	6	3	4	5	14	21	4	4	19	4	30	18	10	8	0	11	3	10	2	4
ID764	LINE/L1	L1-2_BT	ATCTATTTTATATATAGTAGTGTGTATATGTTAATCCCAAAC	18	13	14	8	14	17	15	9	13	16	13	14	13	12	24	12	6	10	16	7	15	4	11	26	10	11	5	9	11	18	12	17
ID765	LINE/L1	L1-2_BT	ATGAACTTATTTACAAAACAGAAACAGACTCACAGACATAGA	0	28	39	45	36	37	24	46	41	38	43	49	39	43	59	33	38	27	43	16	25	31	50	51	28	38	33	37	43	40	54	26
ID766	LINE/L1	L1-2_BT	ATGATACAAATGAACTTATTTACAAAACAGAAACAGACTCAC	0	44	53	74	58	45	45	0	48	53	69	64	73	54	104	57	47	44	66	35	55	45	83	99	58	54	38	44	62	46	69	43
ID767	LINE/L1	L1-2_BT	ATGCCATTTGCAGCAACATGGATGGACCTAGAGATTATCATA	147	57	56	76	61	47	48	66	80	54	73	109	50	60	155	59	38	64	50	30	69	59	82	154	92	52	55	40	67	133	73	40
ID768	LINE/L1	L1-2_BT	ATGCTCAACATCACTAATTATTAGAGAAATGCAAATCAAAAC	0	71	85	0	0	0	74	0	84	0	0	81	0	68	122	83	0	85	70	36	68	59	109	119	77	73	51	55	75	87	86	81
ID769	LINE/L1	L1-2_BT	ATGGAACTCTGCTCAATGTTATGTGGCAGCCTGGATGGGAGG	47	49	43	46	47	46	46	44	37	48	42	48	55	36	83	43	21	48	51	25	42	38	48	72	36	49	40	25	48	49	47	48
ID770	LINE/L1	L1-2_BT	ATGGAAGCAACCTAAATGTCCATCAACAGATGAATGGATAAA	0	47	48	52	39	42	64	53	42	52	52	48	45	40	68	46	45	42	41	18	48	41	61	61	39	40	31	38	42	60	41	58
ID771	LINE/L1	L1-2_BT	ATGGACACACTGCTGTATTTAACATGGAGAACCAGCAAGGAC	0	13	18	14	26	11	31	28	1	15	19	15	6	21	32	25	15	28	7	22	21	13	14	79	89	16	12	20	37	29	6	9
ID772	LINE/L1	L1-2_BT	ATGGACACACTGCTGTGTTTAACATGGAGAACCAGCAAGGAC	24	10	15	143	13	28	13	53	0	25	32	24	23	23	14	16	20	57	23	11	11	24	14	31	10	15	20	29	9	22	7	11
ID773	LINE/L1	L1-2_BT	ATGGACATGGACACACTGCTGTATTTAACATGGAGAACCAGC	31	10	16	12	26	11	27	26	1	16	20	21	10	20	36	22	26	23	7	27	18	15	14	84	92	16	10	17	33	30	5	7
ID774	LINE/L1	L1-2_BT	ATGGACATGGACACACTGCTGTGTTTAACATGGAGAACCAGC	18	12	18	148	15	28	13	53	0	27	29	24	20	24	14	16	18	60	34	11	17	21	13	34	11	19	26	21	8	20	7	14
ID775	LINE/L1	L1-2_BT	ATGGACATGTACACACTGCTATATTTAAAATGGATAACCAAC	66	51	54	45	46	66	67	50	40	55	55	71	66	43	84	49	39	54	61	20	50	40	50	87	60	47	35	49	50	74	42	69
ID776	LINE/L1	L1-2_BT	ATGGACATTTAGGTTGCTTCCATGTCTTGGCTATTGTAAATA	49	40	38	56	34	54	44	46	53	51	55	41	45	22	54	35	21	35	49	25	49	27	55	56	42	38	31	21	38	46	50	46
ID777	LINE/L1	L1-2_BT	ATGGAGAACCAGCAAGGACCTGCTGGACAGCACAGGGAACTC	40	32	33	184	23	20	37	58	0	53	46	45	39	32	54	2	25	27	20	30	43	37	44	124	193	32	13	34	41	40	38	21
ID778	LINE/L1	L1-2_BT	ATGGATAAACAACAAGGTCCTACTGTATAGCACAGGGAACTA	0	44	39	41	37	37	23	35	42	40	34	31	55	34	78	39	45	28	55	20	18	37	58	77	31	46	41	42	54	34	45	23
ID779	LINE/L1	L1-2_BT	ATGGATAACCAACAAGGACCTACTGTATAGCACAGGGAACTC	73	51	34	64	36	34	72	62	45	49	36	47	52	56	72	37	41	70	50	15	44	38	68	105	39	49	40	36	56	81	63	76
ID780	LINE/L1	L1-2_BT	ATGGATACATGTATATGTATGGCTGAGTCCCTTTGCTGTTCA	0	35	40	7	45	52	39	7	13	42	46	30	45	31	64	45	29	41	18	23	26	25	14	75	38	32	38	32	45	40	17	44
ID781	LINE/L1	L1-2_BT	ATGGCTGAGTCCCTTTGCTGTCCACCTGAAACTATCACAACA	92	52	94	25	73	90	77	23	25	77	71	76	94	63	96	84	52	80	79	47	67	56	27	106	73	53	55	2	84	72	42	80
ID782	LINE/L1	L1-2_BT	ATGGCTGAGTCCCTTTGCTGTTCACCTGAAACTATCACAACA	46	33	71	9	58	66	37	11	13	53	53	48	74	64	89	75	57	56	41	42	40	48	10	97	58	35	43	44	60	52	11	37
ID783	LINE/L1	L1-2_BT	ATGGGAGGGGAGTTTGGGGGAGAATGGATACATGTATATGTA	92	58	64	44	74	78	73	44	64	77	73	59	54	53	133	64	34	63	72	33	45	47	59	109	76	53	42	39	74	83	71	80
ID784	LINE/L1	L1-2_BT	ATGGGGGAAGGGATAGTCAGGGAGTCTGGGATGGACATGGAC	20	13	29	289	35	26	18	110	7	24	18	17	27	31	25	20	53	48	23	19	32	25	57	57	167	16	12	35	14	17	30	10
ID785	LINE/L1	L1-2_BT	ATGGTCACCAGGGGGAAGGATGGGGGAAGGGATAGTCAGGGA	13	8	8	239	6	7	8	44	4	7	4	8	7	18	6	11	33	28	5	5	18	14	31	6	89	4	5	15	9	14	25	4
ID786	LINE/L1	L1-2_BT	ATGGTTCCCAGGGGGAAGGATGGGGGAAGGGATAGTCAGGGA	0	5	9	31	12	10	5	22	1	11	25	6	16	10	38	12	8	12	16	8	11	8	8	57	46	4	5	4	4	2	2	2
ID787	LINE/L1	L1-2_BT	ATGGTTTATCACAGGATATTGAATATAGTTCCCTGTGCTATA	26	49	41	51	42	28	25	46	46	66	55	59	48	34	76	39	42	46	63	20	36	40	65	72	44	46	39	38	38	30	49	28
ID788	LINE/L1	L1-2_BT	ATGTACACACTGCTATATTTAAAATGGATAACCAACAAGGAC	111	82	72	72	74	92	97	74	73	83	75	78	93	62	112	63	62	75	83	30	74	56	74	111	78	80	47	77	80	110	86	97
ID789	LINE/L1	L1-2_BT	ATGTATAACTGAATCACTTTGCTGTACACCTGAAACTAACAC	53	34	45	5	45	35	43	6	11	45	49	33	59	38	128	49	37	52	54	26	33	40	4	136	76	33	38	31	8	60	10	50
ID790	LINE/L1	L1-2_BT	ATGTATATGTATGGCTGAGTCCCTTTGCTGTTCACCTGAAAC	50	25	50	6	51	47	41	4	12	47	51	33	64	47	69	55	44	46	26	34	28	37	7	80	64	28	42	43	50	47	5	44
ID791	LINE/L1	L1-2_BT	ATGTATCCATTCTCCCCCAAACTCCCCTCCCATCCAGGCTGC	196	119	128	131	122	140	148	124	118	120	114	132	107	106	196	109	90	109	125	63	91	87	140	197	121	126	104	82	125	143	128	157
ID792	LINE/L1	L1-2_BT	ATGTATGGCTGAGTCCCTTTGCTGTTCACCTGAAACTATCAC	41	21	61	4	55	60	40	5	14	63	49	39	80	51	75	63	46	53	29	39	33	39	8	90	55	26	46	39	52	46	7	40
ID793	LINE/L1	L1-2_BT	ATGTCTGTGAGTCTGTTTCTGTTTTGTAAATAAGTTCATTTG	35	26	34	45	31	29	26	45	32	35	41	43	47	37	47	31	37	26	48	16	26	34	49	53	33	34	31	37	35	37	37	32
ID794	LINE/L1	L1-2_BT	ATGTGCTATACAGTAGGTCCTTGTTGGTTATCCATTTTAAAT	43	30	29	29	24	40	39	32	31	34	21	22	46	28	63	26	26	17	35	11	23	30	37	74	28	28	20	25	35	42	42	40
ID795	LINE/L1	L1-2_BT	ATGTGGCAGCCTGGATGGGAGGGGAGTTTGGGGGAGAATGGA	183	127	122	115	133	132	151	128	128	124	114	152	113	111	217	111	96	117	124	56	86	82	148	198	131	126	100	77	127	134	123	155
ID796	LINE/L1	L1-2_BT	ATGTTAAACACAGCAGTGTGTCCATGTCCATCCCAGACTCCC	16	10	11	148	13	26	9	53	0	25	22	24	18	26	12	11	19	42	27	9	21	18	12	30	8	15	23	16	4	14	6	11
ID797	LINE/L1	L1-2_BT	ATGTTAAATACAGCAGTGTGTCCATGTCCATCCCAGACTCCC	29	11	9	7	14	9	19	32	1	18	18	19	14	13	28	9	19	23	9	8	19	13	8	79	92	13	17	14	15	25	4	7
ID798	LINE/L1	L1-2_BT	ATGTTATGTGGCAGCCTGGATGGGAGGGGAGTTTGGGGGAGA	123	77	68	97	84	87	101	104	107	92	91	86	85	55	156	75	58	79	86	35	55	49	110	139	80	80	61	50	81	98	111	96
ID799	LINE/L1	L1-2_BT	ATGTTGTGATAGTTTCAGGTGAACAGCAAAGGGACTCAGCCA	45	33	64	9	49	64	38	11	10	58	59	46	72	57	91	71	54	54	33	37	42	45	10	96	54	34	42	42	55	51	12	36
ID800	LINE/L1	L1-2_BT	ATGTTGTGATAGTTTCAGGTGGACAGCAAAGGGACTCAGCCA	94	52	77	27	59	83	69	23	25	74	78	73	97	61	92	71	40	77	74	39	71	53	29	102	72	49	57	2	80	70	38	73
ID801	LINE/L1	L1-2_BT	ATGTTGTGTTAGTTTCAGGTGTACAGCAAAGTGATTCAGTTA	51	29	44	1	51	40	43	0	4	58	54	40	52	32	88	54	32	56	70	26	31	36	2	108	58	30	33	38	1	56	7	47
ID802	LINE/L1	L1-2_BT	ATTAACAATGTTGTGATAGTTTCAGGTGAACAGCAAAGGGAC	37	38	52	5	40	61	44	8	11	52	64	37	64	65	70	59	68	42	28	32	39	45	11	65	33	35	44	51	51	42	10	40
ID803	LINE/L1	L1-2_BT	ATTAACAATGTTGTGATAGTTTCAGGTGGACAGCAAAGGGAC	81	59	73	28	61	89	63	23	21	64	84	82	82	62	86	67	42	54	72	41	62	49	32	109	72	54	52	3	80	67	30	64
ID804	LINE/L1	L1-2_BT	ATTACAGAATATTGAGTAGAGTTCCCTGTGCTATACAGTAGG	0	17	14	0	0	0	11	0	12	12	0	25	0	13	24	9	12	10	11	2	9	7	22	32	22	16	12	10	14	17	12	16
ID805	LINE/L1	L1-2_BT	ATTACAGAGTACTGAGCAGAGTTCCCTGTGCTGTCCAGCAGG	0	1	2	0	3	0	0	0	0	0	6	2	2	4	3	0	1	4	0	1	1	0	2	5	156	4	0	1	2	4	0	1
ID806	LINE/L1	L1-2_BT	ATTACAGAGTATTGAGCAGAGTTCCCTGTGCTGTCCAGCAGG	26	24	14	143	18	8	13	39	0	6	30	6	15	7	54	2	15	14	10	7	30	9	28	128	29	25	5	17	20	24	8	8
ID807	LINE/L1	L1-2_BT	ATTATATATAGAATGGATAAACAACAAGGTCCTACTGTATAG	12	5	12	9	7	14	8	5	4	10	11	5	14	5	14	9	5	5	15	5	8	6	19	17	6	6	11	5	9	6	10	9
ID808	LINE/L1	L1-2_BT	ATTCAATATCCTGTGATAAACCATAATGGAAAAGAATATGAA	0	49	49	0	0	48	47	0	51	59	65	63	0	44	87	55	39	43	73	29	48	50	79	82	55	50	49	42	58	51	62	41
ID809	LINE/L1	L1-2_BT	ATTCACTTTGCTGTACAGCAGAAACTAACACAACATTGTAAA	98	57	79	1	67	76	94	3	3	84	48	77	88	53	151	71	47	63	84	34	61	48	3	111	57	31	39	46	51	90	2	100
ID810	LINE/L1	L1-2_BT	ATTCTCCCCCAAACTCCCCTCCCATCCAGGCTGCCACATAAC	161	106	102	101	116	125	118	106	123	113	110	118	116	0	191	103	90	102	114	48	65	75	132	172	111	103	80	68	120	119	109	119
ID811	LINE/L1	L1-2_BT	ATTCTGTAATAACCTATATGGGAAAAGAATCTGAAAAAGAAT	0	19	14	15	19	20	22	0	14	28	19	17	12	0	19	19	14	18	22	5	10	19	11	25	15	15	16	20	14	20	14	20
ID812	LINE/L1	L1-2_BT	ATTGAGCAGAGTTCCATGTGCTATACAGTAGGTCCTTGTTGG	31	16	11	32	11	21	34	25	22	25	29	28	34	17	41	10	13	7	28	2	16	19	41	45	34	14	19	22	25	33	24	35
ID813	LINE/L1	L1-2_BT	ATTGAGCAGAGTTCCCTGTGCTATACAGTAGGTCCTTGTTGG	71	52	37	64	36	33	74	53	54	59	47	49	53	45	68	40	41	52	56	21	46	32	67	97	36	50	44	39	58	69	70	66
ID814	LINE/L1	L1-2_BT	ATTGAGCAGAGTTCCCTGTGCTGTCCAGCAGGTCCTTGCTGG	14	27	34	177	21	18	23	57	1	47	42	44	25	22	46	2	31	21	14	22	47	26	49	123	50	25	19	32	32	24	34	18
ID815	LINE/L1	L1-2_BT	ATTTAAAATGGATAACCAACAAGGACCTACTGTATAGCACAG	82	49	40	55	59	35	68	57	47	54	34	56	48	54	67	45	43	57	56	21	44	38	56	109	41	42	44	36	47	82	68	71
ID816	LINE/L1	L1-2_BT	ATTTAACATGGAGAACCAGCAAGGACCTGCTGGACAGCACAG	0	23	21	0	0	0	25	0	0	23	0	23	0	0	29	14	8	14	9	19	26	15	21	93	116	26	11	18	30	28	7	14
ID817	LINE/L1	L1-2_BT	ATTTACAAAACAGAAACAGACTCACAGACATAGAAAACAAAC	25	23	24	20	24	34	23	23	29	36	31	45	35	24	61	19	22	24	36	12	23	18	29	38	31	28	28	19	32	25	31	23
ID818	LINE/L1	L1-2_BT	ATTTACAATAGCCAAGACATGGAAGCAACCTAAATGTCCATC	40	31	27	41	29	31	36	37	37	40	46	33	36	14	35	24	19	28	41	20	35	22	38	47	33	34	25	14	29	37	38	40
ID819	LINE/L1	L1-2_BT	ATTTAGGTCACCACAGAGCACTGAGTAGAGTTCCCTGTGCTA	55	24	24	8	23	13	48	10	4	16	19	22	37	35	54	20	31	23	19	9	12	31	13	55	20	25	27	28	24	45	2	42
ID820	LINE/L1	L1-2_BT	ATTTAGGTTGCTTCCATGTCTTGGCTATTGTAAATAGTGCTG	0	35	32	0	0	55	40	0	45	35	52	39	0	32	52	28	32	43	47	19	40	35	62	64	42	37	28	29	45	43	45	43
ID821	LINE/L1	L1-2_BT	ATTTGTATCATTTCTTTTTAGATTCCACATATAAGGGATGTC	62	40	44	56	41	42	53	60	40	46	43	47	44	33	85	41	37	47	50	22	42	30	46	83	33	39	40	40	44	57	54	50
ID822	LINE/L1	L1-2_BT	ATTTTAAATATAGCAGTGTGTACATGTCCATCCCAAACTCCC	75	55	59	56	55	70	69	63	48	63	51	58	70	57	83	51	39	60	66	19	54	52	55	92	66	55	54	53	54	81	57	74
ID823	LINE/L1	L1-2_BT	CAAAACAGAAACAGACTCACAGACATAGAAAACAAACTTATG	22	19	21	17	20	16	22	16	17	32	23	40	21	22	46	15	24	16	30	9	18	15	18	35	24	21	21	21	19	15	22	21
ID824	LINE/L1	L1-2_BT	CAAACTCCCCTCCCATCCAGGCTGCCACATAACATTGAGCAG	142	108	104	117	106	114	137	121	125	110	118	114	120	0	196	121	60	102	109	63	80	65	134	194	95	105	84	54	120	130	139	125
ID825	LINE/L1	L1-2_BT	CAAAGGGACTCAGCCATACATATACATGTATCCATTCTCCCC	102	76	85	29	77	92	78	35	60	79	102	78	66	63	120	77	54	67	69	38	68	49	54	124	58	70	55	52	88	88	62	87
ID826	LINE/L1	L1-2_BT	CAACAAGGACCTACTGTATAGCACAGGGAACTCTACTCAATA	0	30	20	0	0	6	24	0	14	17	19	20	0	20	34	18	15	16	16	8	22	9	35	37	28	28	8	17	23	20	28	26
ID827	LINE/L1	L1-2_BT	CAACAAGGACCTACTGTATAGCACAGGGAACTCTGCTCAATG	48	39	24	56	21	24	50	42	40	36	30	37	39	31	44	24	30	36	34	17	31	21	43	65	24	35	27	25	36	51	51	49
ID828	LINE/L1	L1-2_BT	CAACAAGGACCTACTGTATAGCACATGGAACTCTGCTCAATG	33	23	13	34	13	23	33	28	22	30	28	26	38	17	49	14	17	8	29	5	18	24	42	49	28	21	24	24	28	34	28	34
ID829	LINE/L1	L1-2_BT	CAACAAGGTCCTACTGTATAGCACAGGGAACTATATTCAATA	24	46	43	57	37	35	21	48	45	48	47	64	63	41	86	37	38	30	56	20	22	34	59	86	51	48	34	33	51	34	66	24
ID830	LINE/L1	L1-2_BT	CAAGGACCTACTGTATAGCACAGGGAACTCTACTCAATATTC	17	16	12	19	9	2	19	19	9	10	12	18	17	10	20	6	11	12	12	2	11	6	19	26	15	14	8	11	12	14	14	18
ID831	LINE/L1	L1-2_BT	CAAGGACCTACTGTATAGCACAGGGAACTCTGCTCAATGTTA	60	36	26	63	28	17	52	45	40	42	34	31	37	27	49	28	29	37	37	13	31	21	39	66	26	35	28	20	32	61	48	52
ID832	LINE/L1	L1-2_BT	CAAGGACCTACTGTATAGCACATGGAACTCTGCTCAATGTTA	37	24	14	43	17	23	30	39	34	34	27	22	44	21	53	11	16	11	26	5	23	25	48	57	27	20	21	19	31	35	32	31
ID833	LINE/L1	L1-2_BT	CAAGGACCTGCTGGACAGCACAGGGAACTCTGCTCAATACTC	22	22	17	163	15	6	17	44	0	9	38	10	16	6	57	1	16	14	7	9	34	10	27	125	27	20	4	18	23	22	30	13
ID834	LINE/L1	L1-2_BT	CAAGGACCTGCTGGACAGCACAGGGAACTCTGCTCAGTACTC	8	2	3	0	4	0	0	0	0	1	8	2	3	3	4	0	1	4	0	2	1	1	0	4	146	3	0	2	4	4	0	1
ID835	LINE/L1	L1-2_BT	CAAGGTCCTACTGTATAGCACAGGGAACTATATTCAATATCC	25	43	41	52	36	31	15	50	44	50	42	58	62	43	60	42	38	39	50	15	36	35	58	70	48	44	39	35	37	31	61	19
ID836	LINE/L1	L1-2_BT	CAATACTCTGTAATAACCTTATGGTCACCAGGGGGAAGGATG	15	5	6	139	2	13	10	16	0	3	4	2	6	0	4	5	10	21	4	4	17	3	30	17	10	8	0	10	3	11	3	4
ID837	LINE/L1	L1-2_BT	CAATATCCTGTGATAAACCATAATGGAAAAGAATATGAAAAA	46	53	60	56	71	53	44	58	46	57	60	53	74	0	80	67	49	43	74	33	52	55	74	75	55	50	46	49	65	52	64	48
ID838	LINE/L1	L1-2_BT	CAATATTCTGTAATAACCTATATGGGAAAAGAATCTGAAAAA	24	16	16	9	15	16	19	12	10	24	18	15	8	0	19	16	9	16	26	8	10	16	13	21	20	14	15	17	13	26	12	17
ID839	LINE/L1	L1-2_BT	CAATGTTATGTGGCAGCCTGGATGGGAGGGGAGTTTGGGGGA	114	76	68	83	72	85	88	88	86	86	85	77	80	53	145	70	52	72	73	37	52	48	96	129	73	82	52	47	78	93	94	91
ID840	LINE/L1	L1-2_BT	CAATGTTGTGATAGTTTCAGGTGAACAGCAAAGGGACTCAGC	37	38	70	6	51	68	36	7	8	58	61	39	79	68	84	73	66	50	29	38	43	44	11	93	51	36	44	47	56	47	13	32
ID841	LINE/L1	L1-2_BT	CAATGTTGTGATAGTTTCAGGTGGACAGCAAAGGGACTCAGC	0	57	77	23	63	91	69	26	28	70	80	83	87	64	97	73	39	80	76	41	69	53	29	101	78	53	63	2	83	70	36	72
ID842	LINE/L1	L1-2_BT	CACAGGATATTGAATATAGTTCCCTGTGCTATACAGTAGGAC	0	36	31	0	0	0	12	0	29	41	0	43	0	26	55	26	26	29	38	8	30	19	41	53	35	36	29	27	33	22	41	11
ID843	LINE/L1	L1-2_BT	CACAGGGAACTATATTCAATATCCTGTGATAAACCATAATGG	0	59	60	0	0	45	30	0	58	69	65	68	0	40	77	43	40	55	77	27	46	42	73	88	55	58	46	42	46	46	62	31
ID844	LINE/L1	L1-2_BT	CACAGGGAACTCTACTCAATATTCTGTAATAACCTATATGGG	10	11	5	8	6	5	7	5	7	6	13	9	9	11	15	6	4	11	13	3	7	5	7	15	12	8	3	3	6	10	4	8
ID845	LINE/L1	L1-2_BT	CACAGGGAACTCTACTCAGTGCTCTGTGGTGACCTAAATGGG	62	32	27	12	25	12	65	10	5	21	26	35	38	43	62	24	37	39	18	9	16	42	11	60	14	34	34	36	23	58	3	61
ID846	LINE/L1	L1-2_BT	CACAGGGAACTCTGCTCAATGTTATGTGGCAGCCTGGATGGG	141	83	80	94	81	86	135	94	95	78	89	97	84	69	160	75	67	96	73	42	64	54	94	137	70	78	70	48	95	138	99	125
ID847	LINE/L1	L1-2_BT	CACATAACATTGAGCAGAGTTCCCTGTGCTATACAGTAGGTC	40	27	29	58	30	17	51	41	39	35	27	31	27	20	41	30	23	37	28	12	21	22	35	60	21	25	27	14	35	53	48	47
ID848	LINE/L1	L1-2_BT	CACATGGAACTCTGCTCAATGTTATGTGGCAGCCTGGATGGG	0	42	38	0	0	48	51	0	39	64	54	53	0	43	87	45	27	47	54	22	50	45	51	71	50	45	42	26	40	52	49	50
ID849	LINE/L1	L1-2_BT	CACCAGGGGGAAGGATGGGGGAAGGGATAGTCAGGGAGTCTG	12	7	6	229	4	11	9	52	4	7	2	7	4	16	4	7	30	19	7	3	16	9	30	4	87	4	5	17	10	7	21	2
ID850	LINE/L1	L1-2_BT	CACCTGAAACTAACACAACATTGTAAATCAACTATACTCCAA	44	16	28	28	31	32	34	26	25	35	24	34	29	0	61	26	34	32	36	14	27	25	30	74	42	10	15	28	5	29	24	33
ID851	LINE/L1	L1-2_BT	CACCTGAAACTAACACAACATTGTAAATCAACTATACTTCAA	0	9	22	0	0	28	20	0	15	22	14	21	0	15	42	20	21	29	16	9	14	12	21	38	30	7	6	18	10	29	15	20
ID852	LINE/L1	L1-2_BT	CACCTGAAACTATCACAACATTGTTAATTGGCTATACTCCAA	25	15	35	20	26	36	28	22	14	35	29	23	34	0	32	25	21	22	28	12	27	21	14	32	24	17	22	13	33	25	22	26
ID853	LINE/L1	L1-2_BT	CACTATTTACAATAGCCAAGACATGGAAGCAACCTAAATGTC	53	42	39	43	31	47	45	41	53	48	64	34	42	0	58	33	31	45	51	22	48	31	58	67	40	42	28	29	43	47	47	45
ID854	LINE/L1	L1-2_BT	CACTGCTGTATTTAACATGGAGAACCAGCAAGGACCTGCTGG	0	10	8	19	8	8	22	30	0	16	13	16	8	22	30	12	9	15	5	15	12	9	11	88	90	12	8	16	27	23	7	11
ID855	LINE/L1	L1-2_BT	CACTGCTGTGTTTAACATGGAGAACCAGCAAGGACCTGCTGG	20	4	8	146	8	10	15	55	2	25	20	18	16	12	11	11	13	28	11	7	11	9	11	21	7	7	26	15	6	12	8	10
ID856	LINE/L1	L1-2_BT	CACTTTGCTGTACACCTGAAACTAACACAACATTGTAAATCA	96	61	79	9	81	75	67	12	13	83	65	65	90	62	160	70	59	83	84	33	49	62	5	171	82	42	53	55	1	93	16	60
ID857	LINE/L1	L1-2_BT	CACTTTGCTGTACAGCAGAAACTAACACAACATTGTAAAGCA	69	43	59	1	51	68	71	4	1	65	37	53	67	37	107	61	35	48	61	29	49	32	3	63	22	15	29	37	38	63	2	80
ID858	LINE/L1	L1-2_BT	CACTTTGCTGTACAGCAGAAACTAACACAACATTGTAAATCA	0	16	23	1	26	22	30	2	3	27	18	23	30	19	53	17	16	29	29	9	22	20	2	47	31	17	12	16	16	35	2	29
ID859	LINE/L1	L1-2_BT	CACTTTGCTGTACAGCAGAAATTAACACAACATTGTAAATCA	71	41	51	11	61	55	53	9	8	54	45	56	50	40	64	49	46	56	60	21	40	38	9	77	40	52	30	44	30	62	5	62
ID860	LINE/L1	L1-2_BT	CAGAAACAGACTCACAGACATAGAAAACAAACTTATGGTTAC	31	18	23	18	13	17	17	17	12	25	20	30	27	21	40	17	25	13	16	4	16	21	22	32	16	18	20	20	22	24	21	16
ID861	LINE/L1	L1-2_BT	CAGAAACTAACACAACATTGTAAAGCAACTATACTCCAATAA	45	18	32	12	33	40	37	13	14	40	31	38	46	22	67	37	22	26	35	12	34	28	14	63	26	10	29	22	27	35	16	39
ID862	LINE/L1	L1-2_BT	CAGAAACTAACACAACATTGTAAATCAACTATACTCCAATAA	31	26	28	18	22	23	29	19	17	19	14	26	33	10	35	23	14	25	24	12	21	12	19	43	16	20	14	12	21	35	13	35
ID863	LINE/L1	L1-2_BT	CAGACTCCCTGACTATCCCTTCCCCCATCCTTCCCCCTGGGA	3	5	4	34	20	7	3	19	0	8	19	9	9	6	23	9	11	12	11	7	8	7	7	46	44	5	6	4	2	1	1	2
ID864	LINE/L1	L1-2_BT	CAGAGAAAGACAAATATCATATGATATCACTTATATGTGGAA	30	25	22	33	18	12	28	33	27	24	29	24	27	28	45	31	13	26	25	14	14	21	45	44	26	26	21	18	20	35	27	22
ID865	LINE/L1	L1-2_BT	CAGAGTTCCCTGTGCTATACAGTAGGTCCTTGTTGGTTATCC	70	49	29	58	38	28	67	55	42	51	37	51	47	52	69	33	38	70	54	16	42	33	60	97	36	46	38	33	56	80	55	72
ID866	LINE/L1	L1-2_BT	CAGAGTTCCCTGTGCTGTCCAGCAGGTCCTTGCTGGTTCTCC	40	40	46	188	25	23	40	64	0	54	53	46	44	43	53	2	32	28	26	34	48	45	48	127	209	44	18	39	42	45	36	26
ID867	LINE/L1	L1-2_BT	CAGCAAAGGGACTCAGCCATACATATACATGTATCCATTCTC	94	78	95	26	87	105	81	25	53	76	104	82	87	61	136	79	55	68	78	39	72	59	40	134	67	72	60	52	94	70	59	82
ID868	LINE/L1	L1-2_BT	CAGCAAGGACCTGCTGGACAGCACAGGGAACTCTGCTCAATA	10	17	14	164	11	4	13	42	0	12	38	11	12	6	35	2	11	13	7	10	35	9	32	102	29	15	4	16	21	19	31	9
ID869	LINE/L1	L1-2_BT	CAGCAAGGACCTGCTGGACAGCACAGGGAACTCTGCTCAGTA	5	2	2	0	1	0	1	2	0	1	8	0	4	0	0	0	1	3	1	2	1	1	0	3	142	3	0	1	3	3	0	1
ID870	LINE/L1	L1-2_BT	CAGCACAGGGAACTCTGCTCAATACTCTGTAATAACCTTATG	33	18	21	88	22	22	21	16	0	8	43	4	30	6	49	7	20	28	9	12	32	12	21	106	23	25	4	19	17	30	1	10
ID871	LINE/L1	L1-2_BT	CAGCACAGGGAACTCTGCTCAGTACTCTGTAATAACCTTATG	6	2	6	0	3	2	1	0	0	0	8	2	1	4	1	0	1	10	0	2	2	0	0	4	136	6	0	1	2	4	0	0
ID872	LINE/L1	L1-2_BT	CAGCAGAAACTAACACAACATTGTAAAGCAACTATACTCCAA	44	20	30	8	36	39	42	7	10	43	31	45	45	0	80	40	26	26	37	15	37	29	7	72	25	12	28	42	31	36	7	45
ID873	LINE/L1	L1-2_BT	CAGCAGTGTGTCCATGTCCATCCCAGACTCCCTGACTATCCC	26	19	40	182	40	22	24	88	1	33	33	40	31	0	30	27	45	50	28	20	44	28	50	69	153	24	23	40	30	24	8	19
ID874	LINE/L1	L1-2_BT	CAGCCATACATATACATGTATCCATTCTCCCCCAAACTCCCC	94	65	66	34	72	90	73	39	55	76	75	69	57	54	111	67	39	65	71	33	59	39	42	101	68	66	52	40	69	84	68	82
ID875	LINE/L1	L1-2_BT	CAGCCTGGATGGGAGGGGAGTTTGGGGGAGAATGGATACATG	203	122	136	139	132	145	153	129	126	119	115	138	101	106	207	114	88	112	139	60	88	89	146	205	113	130	100	82	135	160	134	160
ID876	LINE/L1	L1-2_BT	CAGGCTGCCACATAACATTGAGCAGAGTTCCATGTGCTATAC	44	41	27	50	30	32	38	42	27	33	38	49	37	0	75	37	23	21	42	19	36	28	42	58	23	38	38	20	39	46	31	40
ID877	LINE/L1	L1-2_BT	CAGGCTGCCACATAACATTGAGCAGAGTTCCCTGTGCTATAC	76	42	42	60	46	37	71	63	55	55	46	55	47	45	71	38	45	63	53	20	42	27	62	97	40	39	51	24	51	83	60	70
ID878	LINE/L1	L1-2_BT	CAGGGAACTATATTCAATATCCTGTGATAAACCATAATGGAA	51	64	60	61	46	42	35	57	60	76	66	64	66	44	79	47	48	60	76	25	47	57	80	92	54	62	47	50	47	46	67	38
ID879	LINE/L1	L1-2_BT	CAGGGAACTCTACTCAGTGCTCTGTGGTGACCTAAATGGGAA	87	46	38	16	40	10	82	12	6	29	37	46	46	51	72	35	40	51	24	14	22	52	13	78	21	46	40	43	33	73	5	77
ID880	LINE/L1	L1-2_BT	CAGGGAACTCTGCTCAATACTCTGTAATAACCTTATGGTCAC	0	8	8	0	0	0	11	0	1	0	0	0	0	0	7	2	0	19	2	5	19	4	26	18	11	10	2	10	12	15	3	6
ID881	LINE/L1	L1-2_BT	CAGGGAACTCTGCTCAATGTTATGTGGCAGCCTGGATGGGAG	134	85	80	82	89	91	123	82	93	80	83	101	83	68	155	84	62	92	75	44	66	55	93	139	73	80	76	45	103	133	95	115
ID882	LINE/L1	L1-2_BT	CAGGGAGTCTGGGATGGACATGGACACACTGCTGTATTTAAC	20	9	6	10	10	7	16	31	1	15	14	17	14	9	16	8	25	20	15	5	14	15	12	62	96	9	14	16	19	16	4	7
ID883	LINE/L1	L1-2_BT	CAGGGAGTCTGGGATGGACATGGACACACTGCTGTGTTTAAC	14	6	8	148	17	21	8	64	0	27	23	29	18	21	10	11	20	37	29	8	20	22	8	21	8	12	23	16	3	11	8	10
ID884	LINE/L1	L1-2_BT	CAGGGGGAAGGATGGGGGAAGGGATAGTCAGGGAGTCTGGGA	0	11	10	0	0	28	12	0	5	20	22	14	0	23	29	17	52	34	22	9	27	21	40	53	153	10	12	28	14	8	23	5
ID885	LINE/L1	L1-2_BT	CAGGTCCTTGCTGGTTCTCCATGTTAAACACAGCAGTGTGTC	27	9	18	148	14	30	15	52	1	25	33	27	23	23	17	17	18	57	26	10	13	31	12	32	9	15	27	30	11	22	7	12
ID886	LINE/L1	L1-2_BT	CAGGTCCTTGCTGGTTCTCCATGTTAAATACAGCAGTGTGTC	38	15	16	17	29	16	31	28	1	21	22	19	8	28	37	29	17	27	8	25	21	12	14	90	89	20	12	22	39	29	7	11
ID887	LINE/L1	L1-2_BT	CAGTGCTCTGTGGTGACCTAAATGGGAAGGAAATCCAAAAAA	90	42	36	26	49	18	81	21	18	48	36	52	54	49	87	43	40	56	40	20	44	46	21	89	17	40	57	48	52	76	11	79
ID888	LINE/L1	L1-2_BT	CAGTGTGTACATGTCCATCCCAAACTCCCTAACTATCCCTTC	47	37	32	36	32	40	38	34	27	39	39	40	35	31	63	33	33	34	41	22	30	18	40	47	27	34	31	31	29	50	40	38
ID889	LINE/L1	L1-2_BT	CAGTGTGTCCATGTCCATCCCAGACTCCCTGACTATCCCTTC	27	17	40	175	35	25	24	79	1	30	24	39	32	31	30	25	40	56	24	18	44	29	49	69	149	23	21	34	30	23	6	20
ID890	LINE/L1	L1-2_BT	CATACATATACATGTATCCATTCTCCCCCAAACTCCCCTCCC	94	60	63	48	74	87	76	48	65	78	77	69	58	58	122	62	38	70	73	33	42	47	61	115	76	57	46	44	70	83	75	83
ID891	LINE/L1	L1-2_BT	CATATACATGTATCCATTCTCCCCCAAACTCCCCTCCCATCC	112	73	78	66	84	89	80	62	82	79	79	84	65	52	154	72	39	74	82	42	52	50	79	124	81	73	53	39	82	92	88	86
ID892	LINE/L1	L1-2_BT	CATATATCCCCTCTTTTTTGGATTTCCTTCCCATTTAGGTCA	51	35	27	21	38	12	53	19	16	41	28	43	33	43	75	30	24	38	37	11	27	29	18	67	15	33	23	27	27	46	11	58
ID893	LINE/L1	L1-2_BT	CATCCCAGACTCCCTGACTATCCCTTCCCCCATCCTTCCCCC	16	12	12	299	26	32	17	116	5	20	15	15	19	24	30	17	51	35	21	11	30	23	49	56	156	13	13	28	17	11	24	9
ID894	LINE/L1	L1-2_BT	CATCCCTTATATGTGGAATCTAAAAAGAAATGATACAAATGA	73	46	48	65	45	48	68	67	48	55	53	59	51	38	94	47	38	61	56	23	45	37	62	90	41	43	38	41	51	70	61	64
ID895	LINE/L1	L1-2_BT	CATGGAACTCTGCTCAATGTTATGTGGCAGCCTGGATGGGAG	54	47	37	58	49	47	51	53	44	58	47	52	56	44	93	45	26	47	54	22	47	43	51	79	53	50	42	26	46	57	56	52
ID896	LINE/L1	L1-2_BT	CATGGACACACTGCTGTATTTAACATGGAGAACCAGCAAGGA	38	11	18	14	25	11	29	28	1	15	19	16	8	19	33	23	16	27	7	24	21	15	14	82	89	14	12	19	37	30	6	9
ID897	LINE/L1	L1-2_BT	CATGGACACACTGCTGTGTTTAACATGGAGAACCAGCAAGGA	23	14	16	142	13	29	13	53	0	25	32	25	23	0	15	15	20	56	26	11	11	25	14	33	10	19	24	29	8	22	7	14
ID898	LINE/L1	L1-2_BT	CATGTACACACTGCTATATTTAAAATGGATAACCAACAAGGA	103	88	71	69	70	93	92	73	68	78	72	84	95	60	112	64	61	74	79	32	73	57	78	120	70	85	46	72	76	116	81	98
ID899	LINE/L1	L1-2_BT	CATGTATATGTATGGCTGAGTCCCTTTGCTGTTCACCTGAAA	58	34	49	3	54	54	43	4	10	43	53	27	60	42	73	58	43	47	19	35	32	39	4	84	63	34	40	40	52	49	7	45
ID900	LINE/L1	L1-2_BT	CATGTGCCTCTTGGCCATCTGTATGTCTTCTTTGGAGAAATG	42	24	22	47	24	21	32	35	29	18	21	27	33	26	26	33	20	25	16	18	21	16	34	40	14	26	21	22	21	35	31	27
ID901	LINE/L1	L1-2_BT	CATGTGCTATACAGTAGGTCCTTGTTGGTTATCCATTTTAAA	0	30	25	0	0	39	36	0	30	38	22	25	0	31	64	22	28	18	39	9	25	32	40	68	35	28	23	31	41	37	44	39
ID902	LINE/L1	L1-2_BT	CATGTTAAACACAGCAGTGTGTCCATGTCCATCCCAGACTCC	17	9	12	150	12	26	9	52	0	27	22	24	18	25	12	11	17	42	29	9	20	17	12	30	8	14	24	16	4	12	6	11
ID903	LINE/L1	L1-2_BT	CATGTTAAATACAGCAGTGTGTCCATGTCCATCCCAGACTCC	31	13	9	7	13	10	20	32	1	18	17	22	14	13	28	9	19	25	9	7	19	13	9	78	93	13	17	15	16	26	4	8
ID904	LINE/L1	L1-2_BT	CATTATGGTTTATCACAGGATATTGAATATAGTTCCCTGTGC	47	56	53	51	46	40	30	50	49	73	63	67	65	40	70	45	39	51	73	25	43	46	68	86	54	55	36	39	47	43	57	34
ID905	LINE/L1	L1-2_BT	CATTCTCCCCCAAACTCCCCTCCCATCCAGGCTGCCACATAA	163	112	107	103	125	129	123	105	133	123	117	124	119	103	200	105	87	109	116	55	71	77	139	183	112	108	83	67	123	124	111	126
ID906	LINE/L1	L1-2_BT	CATTTTAAATATAGCAGTGTGTACATGTCCATCCCAAACTCC	0	52	56	54	55	70	71	57	48	64	52	62	69	56	94	52	45	64	62	21	56	54	55	95	69	54	52	57	53	83	59	75
ID907	LINE/L1	L1-2_BT	CCAAACTCCCCTCCCATCCAGGCTGCCACATAACATTGAGCA	137	99	98	108	97	109	124	106	115	106	115	104	103	71	177	111	59	97	99	57	72	61	119	178	91	97	78	49	112	126	124	116
ID908	LINE/L1	L1-2_BT	CCAATTAACAATGTTGTGATAGTTTCAGGTGAACAGCAAAGG	13	12	19	2	15	21	14	4	4	17	24	15	24	19	18	21	22	18	13	10	10	11	4	18	14	9	8	17	20	13	1	12
ID909	LINE/L1	L1-2_BT	CCACATATAAGTGATATCATATGATATTTGTCTTTCTCTGTC	23	10	12	18	20	9	15	21	15	15	18	11	17	18	26	12	14	17	13	4	10	12	25	28	15	11	11	10	12	23	15	14
ID910	LINE/L1	L1-2_BT	CCAGACTCCCTGACTATCCCTTCCCCCATCCTTCCCCCTGGG	3	5	4	52	20	6	3	49	1	9	19	8	10	6	24	9	22	13	12	7	10	8	8	48	64	5	9	6	2	1	1	2
ID911	LINE/L1	L1-2_BT	CCAGGCTGCCACATAACATTGAGCAGAGTTCCATGTGCTATA	44	38	29	53	28	36	39	43	30	40	44	62	41	28	82	40	24	28	44	18	41	35	48	62	25	38	40	23	40	44	40	39
ID912	LINE/L1	L1-2_BT	CCAGGCTGCCACATAACATTGAGCAGAGTTCCCTGTGCTATA	82	49	49	68	49	39	73	72	67	63	62	65	52	44	91	44	48	71	56	23	48	43	73	102	44	47	59	26	56	87	70	75
ID913	LINE/L1	L1-2_BT	CCAGGGGGAAGGATGGGGGAAGGGATAGTCAGGGAGTCTGGG	15	13	10	283	25	28	12	100	5	21	22	15	16	0	29	17	53	34	23	10	26	19	38	53	151	10	13	25	13	8	22	4
ID914	LINE/L1	L1-2_BT	CCATACATATACATGTATCCATTCTCCCCCAAACTCCCCTCC	90	64	57	43	68	81	72	46	64	74	65	71	56	59	110	58	41	56	71	27	48	45	53	103	70	61	45	45	61	78	66	77
ID915	LINE/L1	L1-2_BT	CCATATAGGTTATTACAGAATATTGAGTAGAGTTCCCTGTGC	10	9	5	10	6	4	8	5	6	4	11	8	8	9	15	4	4	9	12	2	6	6	5	14	12	9	2	4	6	10	3	9
ID916	LINE/L1	L1-2_BT	CCATCCAGGCTGCCACATAACATTGAGCAGAGTTCCATGTGC	58	48	42	46	47	50	54	48	36	66	54	55	56	0	91	48	29	45	56	26	46	44	46	76	54	51	45	29	45	54	50	55
ID917	LINE/L1	L1-2_BT	CCATCCAGGCTGCCACATAACATTGAGCAGAGTTCCCTGTGC	134	81	78	90	75	88	137	93	91	76	81	97	82	72	153	72	66	94	67	42	63	54	89	132	63	68	74	47	91	133	97	124
ID918	LINE/L1	L1-2_BT	CCATCCCAGACTCCCTGACTATCCCTTCCCCCATCCTTCCCC	17	13	14	307	26	32	19	120	6	21	18	15	21	24	31	18	54	39	20	13	31	23	51	58	161	14	13	30	17	13	25	12
ID919	LINE/L1	L1-2_BT	CCATGTCCATCCCAGACTCCCTGACTATCCCTTCCCCCATCC	22	14	26	288	33	24	18	107	6	24	18	16	27	31	24	17	52	46	20	18	30	24	57	57	168	16	13	31	13	17	29	9
ID920	LINE/L1	L1-2_BT	CCATGTGCTATACAGTAGGTCCTTGTTGGTTATCCATTTTAA	43	31	25	25	22	37	41	31	27	35	23	29	47	32	59	18	34	18	37	7	24	31	40	67	35	28	24	31	41	39	39	44
ID921	LINE/L1	L1-2_BT	CCATGTTAAACACAGCAGTGTGTCCATGTCCATCCCAGACTC	0	8	12	0	0	0	0	0	0	0	0	25	0	26	11	11	0	42	29	9	19	16	12	30	9	14	24	16	5	12	6	10
ID922	LINE/L1	L1-2_BT	CCATGTTAAATACAGCAGTGTGTCCATGTCCATCCCAGACTC	0	10	9	0	0	0	19	0	1	16	0	21	0	17	27	8	19	25	7	7	17	13	9	74	93	12	16	15	16	26	4	9
ID923	LINE/L1	L1-2_BT	CCATTCTCCCCCAAACTCCCCTCCCATCCAGGCTGCCACATA	159	118	109	97	125	122	125	106	123	120	109	126	110	100	197	111	85	108	115	54	69	75	139	178	113	117	87	69	120	121	105	125
ID924	LINE/L1	L1-2_BT	CCATTTAGGTCACCACAGAGCACTGAGTAGAGTTCCCTGTGC	69	36	31	13	22	13	69	11	7	23	24	39	42	46	64	24	39	40	21	10	20	42	12	62	19	37	30	37	23	62	3	62
ID925	LINE/L1	L1-2_BT	CCATTTTAAATATAGCAGTGTGTACATGTCCATCCCAAACTC	0	51	51	50	49	62	64	49	42	66	50	65	68	49	90	51	43	67	63	20	56	49	47	96	67	54	48	53	54	81	48	68
ID926	LINE/L1	L1-2_BT	CCCAAACTCCCCTCCCATCCAGGCTGCCACATAACATTGAGC	125	96	91	97	90	95	109	96	105	93	102	93	91	65	162	101	57	87	86	50	61	54	113	158	82	94	66	44	102	108	120	103
ID927	LINE/L1	L1-2_BT	CCCCAAACTCCCCTCCCATCCAGGCTGCCACATAACATTGAG	115	85	85	86	78	88	103	86	95	91	89	90	82	60	158	89	52	86	84	47	62	54	102	145	75	83	57	44	93	95	104	97
ID928	LINE/L1	L1-2_BT	CCCCATCCTTCCCCCTGGGAACCATAAGGTTATTACAGAGTA	10	4	6	37	13	3	2	10	0	1	28	4	5	0	40	7	4	9	6	4	13	5	2	77	31	7	1	7	2	7	1	1
ID929	LINE/L1	L1-2_BT	CCCCATCCTTCCCCCTGGTGACCATAAGGTTATTACAGAGTA	16	5	6	138	2	13	9	12	0	2	5	2	5	5	3	7	10	21	5	2	21	2	27	13	89	9	1	8	4	11	3	5
ID930	LINE/L1	L1-2_BT	CCCCCAAACTCCCCTCCCATCCAGGCTGCCACATAACATTGA	118	82	76	83	74	89	93	87	86	88	87	76	81	0	142	74	53	77	79	38	59	52	99	127	71	87	58	45	86	94	100	91
ID931	LINE/L1	L1-2_BT	CCCCCTGGTGACCATAAGGTTATTACAGAGTACTGAGCAGAG	3	0	1	0	0	0	0	0	0	0	1	0	0	1	0	0	0	7	0	0	1	0	0	0	85	5	1	0	0	1	0	0
ID932	LINE/L1	L1-2_BT	CCCCCTGGTGACCATAAGGTTATTACAGAGTATTGAGCAGAG	0	5	10	133	0	15	15	0	0	3	10	1	11	3	3	6	9	24	4	5	20	4	26	21	13	10	0	11	11	13	3	6
ID933	LINE/L1	L1-2_BT	CCCCTCCCATCCAGGCTGCCACATAACACTGAGCAGAGTTCC	83	72	81	33	62	73	92	34	27	74	77	71	77	83	62	45	83	79	73	32	48	58	32	54	64	79	30	78	70	74	11	90
ID934	LINE/L1	L1-2_BT	CCCCTCCCATCCAGGCTGCCACATAACATTGAGCAGAGTTCC	156	124	118	126	122	129	155	121	119	112	115	131	138	0	219	126	81	118	117	69	85	84	130	205	89	113	104	69	139	159	140	149
ID935	LINE/L1	L1-2_BT	CCCCTCTTTTTTGGATTTCCTTCCCATTTAGGTCACCACAGA	0	41	39	0	0	0	63	0	25	0	0	41	0	47	73	31	0	39	39	15	37	40	28	73	12	37	39	41	44	58	18	72
ID936	LINE/L1	L1-2_BT	CCCCTTTGGTAACCATAAGTTTGTTTTCTATGTCTGTGAGTC	49	33	30	11	33	38	36	8	8	43	43	44	45	40	59	38	30	34	47	8	29	28	13	61	35	33	33	32	32	45	9	38
ID937	LINE/L1	L1-2_BT	CCCTCCCATCCAGGCTGCCACATAACATTGAGCAGAGTTCCA	49	51	49	51	49	46	46	49	41	48	41	46	55	33	89	46	21	53	47	26	39	38	53	75	38	52	44	24	47	53	49	48
ID938	LINE/L1	L1-2_BT	CCCTCCCATCCAGGCTGCCACATAACATTGAGCAGAGTTCCC	112	81	74	85	78	88	116	76	79	65	71	88	78	60	142	80	56	73	66	42	57	51	80	130	50	73	59	43	92	114	91	109
ID939	LINE/L1	L1-2_BT	CCCTCTTTTTTGGATTTCCTTCCCATTTAGGTCACCACAGAG	72	46	48	27	49	21	75	26	25	48	48	49	45	50	82	39	38	44	46	19	45	45	36	75	13	44	49	41	52	66	16	82
ID940	LINE/L1	L1-2_BT	CCCTGACTATCCCTTCCCCCATCCTTCCCCCTGGGAACCATA	7	5	8	21	11	8	5	12	1	10	25	4	13	10	28	11	9	11	9	8	8	8	4	41	40	4	5	3	1	1	2	2
ID941	LINE/L1	L1-2_BT	CCCTGACTATCCCTTCCCCCATCCTTCCCCCTGGTGACCATA	11	7	8	102	5	5	8	14	0	6	3	7	7	18	6	9	33	26	4	6	19	14	21	5	88	4	1	14	6	12	3	4
ID942	LINE/L1	L1-2_BT	CCCTGTGCTATACAGTAGGTCCTTGTTGGTTATCCATTTTAA	0	45	40	53	43	32	67	56	48	50	38	56	49	48	68	40	38	55	50	14	45	41	55	109	42	42	42	31	55	81	62	70
ID943	LINE/L1	L1-2_BT	CCCTGTGCTGTCCAGCAGGTCCTTGCTGGTTCTCCATGTTAA	0	33	30	143	23	29	41	43	0	47	45	46	27	43	43	28	26	30	22	29	47	28	35	112	125	35	28	32	37	40	32	26
ID944	LINE/L1	L1-2_BT	CCCTTCCCCCATCCTTCCCCCTGGGAACCATAAGGTTATTAC	0	6	9	23	0	12	2	0	0	11	31	10	24	12	34	8	15	10	9	9	12	19	2	73	32	7	7	6	3	3	0	1
ID945	LINE/L1	L1-2_BT	CCCTTCCCCCATCCTTCCCCCTGGTGACCATAAGGTTATTAC	18	10	13	127	7	13	16	15	0	4	7	5	9	16	3	8	36	20	7	9	25	14	25	14	90	6	3	14	2	14	2	5
ID946	LINE/L1	L1-2_BT	CCTACTGTATAGCACAGGGAACTCTGCTCAATGTTATGTGGC	59	39	33	59	42	27	54	45	48	44	42	48	37	32	50	37	27	48	31	19	25	30	41	72	30	35	34	13	49	70	49	55
ID947	LINE/L1	L1-2_BT	CCTCTTTTTTGGATTTCCTTCCCATTTAGGTCACCACAGAGC	80	48	48	30	53	22	86	29	27	55	50	57	43	58	86	44	44	49	49	22	49	50	36	83	15	47	56	44	54	71	16	92
ID948	LINE/L1	L1-2_BT	CCTGAAACTAACACAACATTGTAAATCAACTATACTCCAATA	56	33	50	39	41	42	38	36	29	51	34	44	42	42	70	39	39	36	51	18	36	35	40	72	42	30	21	40	15	49	38	39
ID949	LINE/L1	L1-2_BT	CCTGAAACTAACACAACATTGTAAATCAACTATACTTCAATA	0	3	12	0	0	0	9	0	4	11	5	13	0	6	20	9	11	12	8	3	7	11	19	23	15	2	4	12	3	8	9	10
ID950	LINE/L1	L1-2_BT	CCTGAAACTATCACAACATTGTTAATTGGCTATACTCCAATA	28	16	35	24	27	36	24	23	16	29	26	27	33	27	33	27	22	19	26	12	23	15	15	35	21	17	20	12	32	24	26	24
ID951	LINE/L1	L1-2_BT	CCTGACTATCCCTTCCCCCATCCTTCCCCCTGGGAACCATAA	0	5	8	20	10	8	5	12	1	9	25	4	13	10	28	11	9	12	9	8	8	9	4	43	40	3	4	2	1	1	2	2
ID952	LINE/L1	L1-2_BT	CCTGACTATCCCTTCCCCCATCCTTCCCCCTGGTGACCATAA	0	6	8	0	0	0	8	0	0	5	0	6	0	18	6	8	32	22	4	6	19	13	21	5	88	4	1	13	7	12	3	4
ID953	LINE/L1	L1-2_BT	CCTGGTGACCATAAGGTTATTACAGAGTATTGAGCAGAGTTC	17	5	8	133	4	13	12	21	0	2	6	0	9	2	5	5	11	22	2	4	20	4	26	20	11	9	0	13	14	15	3	6
ID954	LINE/L1	L1-2_BT	CCTGTGCTATACAGTAGGACCTTGTTGTTTATCCATTCTATA	0	4	9	0	0	16	4	0	19	18	12	14	0	13	21	6	14	7	19	3	8	11	24	21	9	4	13	14	11	6	18	5
ID955	LINE/L1	L1-2_BT	CCTGTGCTATACAGTAGGTCCTTGTTGGTTATCCATTTTAAA	85	48	43	52	50	32	70	55	49	57	37	62	51	49	66	44	38	58	56	21	48	37	58	106	42	43	48	31	54	83	64	73
ID956	LINE/L1	L1-2_BT	CCTGTGCTATACAGTAGGTCCTTGTTGTTTATCTATTTTATA	12	12	14	18	5	11	4	18	13	13	10	3	17	10	22	10	9	11	12	8	7	10	19	26	17	10	15	12	15	12	17	4
ID957	LINE/L1	L1-2_BT	CCTGTGCTGTCCAGCAGGTCCTTGCTGGTTCTCCATGTTAAA	0	32	30	148	22	29	45	0	0	49	46	45	27	42	43	30	26	33	21	31	47	28	33	113	126	35	31	32	37	41	31	27
ID958	LINE/L1	L1-2_BT	CCTTATGGTCACCAGGGGGAAGGATGGGGGAAGGGATAGTCA	9	5	9	103	5	4	9	15	0	4	2	5	7	16	5	8	31	19	4	6	18	13	18	5	85	3	1	12	7	12	3	4
ID959	LINE/L1	L1-2_BT	CCTTCCCATTTAGGTCACCACAGAGCACTGAGTAGAGTTCCC	77	42	32	14	34	11	77	12	7	30	26	39	46	0	66	29	39	46	23	8	21	49	13	76	14	41	36	34	34	72	4	75
ID960	LINE/L1	L1-2_BT	CCTTCCCCCATCCTTCCCCCTGGGAACCATAAGGTTATTACA	0	7	9	0	0	0	2	0	0	11	0	11	0	12	36	8	15	11	9	10	12	20	2	74	35	8	8	6	3	3	0	1
ID961	LINE/L1	L1-2_BT	CCTTCCCCCATCCTTCCCCCTGGTGACCATAAGGTTATTACA	19	10	13	130	6	13	17	13	0	5	8	5	9	17	3	8	36	20	8	8	25	14	25	14	91	7	4	15	2	13	3	7
ID962	LINE/L1	L1-2_BT	CCTTCCCCCTGGTGACCATAAGGTTATTACAGAGTACTGAGC	1	1	1	0	0	0	0	0	0	0	1	0	0	0	0	1	0	5	0	0	1	0	0	0	83	5	3	0	0	1	0	0
ID963	LINE/L1	L1-2_BT	CCTTCCCCCTGGTGACCATAAGGTTATTACAGAGTATTGAGC	0	6	6	0	0	13	11	0	0	3	8	2	0	3	4	5	15	24	4	4	22	4	38	21	12	9	0	11	9	12	3	4
ID964	LINE/L1	L1-2_BT	CCTTGTTGTTTATCCATTCTATATATAATAGTTTGCATCTGC	6	2	7	10	8	9	6	14	13	7	10	11	10	5	18	9	3	5	5	5	5	7	15	17	7	3	9	3	15	6	15	7
ID965	LINE/L1	L1-2_BT	CTAAATGGGAAGGAAATCCAAAAAAGAGGGGATATATGTATA	44	33	20	11	31	12	44	13	13	29	16	26	33	27	56	21	22	25	31	10	23	18	13	44	19	30	21	20	25	44	11	43
ID966	LINE/L1	L1-2_BT	CTACTCAGTGCTCTGTGGTGACCTAAATGGGAAGGAAATCCA	104	48	48	22	46	13	90	22	14	42	46	45	64	60	78	40	50	69	34	18	33	53	16	94	18	49	45	50	48	87	5	92
ID967	LINE/L1	L1-2_BT	CTACTGTATAGCACAGGGAACTATATTCAATATCCTGTGATA	0	41	36	46	26	17	17	0	35	54	40	49	47	33	62	30	35	33	51	10	42	33	47	63	37	42	40	33	41	24	47	16
ID968	LINE/L1	L1-2_BT	CTACTGTATAGCACAGGGAACTCTACTCAATATTCTGTAATA	20	15	14	19	10	4	12	20	11	9	11	24	20	12	19	7	12	9	10	4	5	8	15	32	15	13	9	10	13	17	8	16
ID969	LINE/L1	L1-2_BT	CTACTGTATAGCACAGGGAACTCTGCTCAATGTTATGTGGCA	57	47	39	65	42	29	55	52	52	46	46	50	39	33	51	40	30	51	35	21	24	33	43	77	29	41	39	17	55	69	52	54
ID970	LINE/L1	L1-2_BT	CTACTGTATAGCACATGGAACTCTGCTCAATGTTATGTGGCA	0	33	24	0	0	28	32	0	29	37	29	30	0	22	56	29	13	10	39	16	23	29	32	49	26	31	28	15	45	35	32	31
ID971	LINE/L1	L1-2_BT	CTATACAGTAGGTCCTTGTTGGTTATCCATTTTAAATATAGC	80	67	53	70	64	64	81	67	66	63	47	59	91	68	87	58	61	70	52	26	59	49	71	116	58	65	50	61	72	76	89	84
ID972	LINE/L1	L1-2_BT	CTATATTCAATATCCTGTGATAAACCATAATGGAAAAGAATA	0	64	68	0	0	49	54	0	73	84	84	76	0	57	115	61	58	63	87	40	64	68	90	101	50	64	65	59	73	55	83	53
ID973	LINE/L1	L1-2_BT	CTATATTTAAAATGGATAACCAACAAGGACCTACTGTATAGC	86	66	49	63	63	63	84	64	63	67	46	59	87	63	85	53	52	67	53	22	58	45	69	117	56	64	48	54	62	78	85	87
ID974	LINE/L1	L1-2_BT	CTATCCCTTCCCCCATCCTTCCCCCTGGGAACCATAAGGTTA	9	4	10	19	9	6	2	10	0	9	24	6	28	12	36	11	14	11	7	5	10	9	3	58	28	6	4	5	6	5	1	2
ID975	LINE/L1	L1-2_BT	CTATCCCTTCCCCCATCCTTCCCCCTGGTGACCATAAGGTTA	16	7	11	108	8	6	14	12	0	3	4	6	8	15	5	10	32	17	5	9	22	11	20	8	82	4	1	9	6	12	4	4
ID976	LINE/L1	L1-2_BT	CTATTTACAATAGCCAAGACATGGAAGCAACCTAAATGTCCA	55	45	44	52	37	60	47	45	52	51	69	35	54	31	54	41	28	47	52	22	54	32	52	67	46	46	39	27	50	47	52	44
ID977	LINE/L1	L1-2_BT	CTATTTTATATATAGTAGTGTGTATATGTTAATCCCAAACTC	21	11	12	11	13	15	16	11	14	16	16	14	16	0	25	11	6	11	20	7	13	7	16	26	14	8	3	9	12	17	19	17
ID978	LINE/L1	L1-2_BT	CTATTTTTAGTTTTTTAAGGAACCTCCATACTGTTCTCCATA	43	40	48	52	46	49	41	49	35	30	43	36	46	0	58	49	40	39	41	25	35	29	46	73	32	38	35	33	49	42	45	43
ID979	LINE/L1	L1-2_BT	CTCAATACTCTGTAATAACCTTATGGTCACCAGGGGGAAGGA	15	5	6	143	2	13	11	17	0	3	6	2	6	3	4	5	14	21	4	5	20	4	32	16	11	7	0	11	7	11	3	4
ID980	LINE/L1	L1-2_BT	CTCAATATTCTGTAATAACCTATATGGGAAAAGAATCTGAAA	21	16	17	10	16	14	18	13	13	23	15	15	12	22	21	13	10	11	23	7	15	15	15	15	21	14	16	17	14	24	10	14
ID981	LINE/L1	L1-2_BT	CTCAGCCATACATATACATGTATCCATTCTCCCCCAAACTCC	0	75	86	47	83	101	81	50	66	90	93	82	67	65	129	80	38	72	75	46	72	42	51	138	76	76	55	40	81	91	81	88
ID982	LINE/L1	L1-2_BT	CTCAGTGCTCTGTGGTGACCTAAATGGGAAGGAAATCCAAAA	112	53	43	30	62	23	98	28	22	54	49	64	74	67	103	51	59	68	45	21	44	61	26	116	20	52	60	71	55	100	11	96
ID983	LINE/L1	L1-2_BT	CTCCATGTTAAACACAGCAGTGTGTCCATGTCCATCCCAGAC	17	8	12	150	15	25	8	52	0	26	21	23	19	26	11	11	16	42	29	9	21	15	12	30	8	14	24	16	5	13	6	9
ID984	LINE/L1	L1-2_BT	CTCCATGTTAAATACAGCAGTGTGTCCATGTCCATCCCAGAC	31	9	9	7	14	10	19	32	1	15	16	19	10	17	26	8	21	22	7	7	15	15	10	70	93	11	14	15	17	27	4	9
ID985	LINE/L1	L1-2_BT	CTCCCTGACTATCCCTTCCCCCATCCTTCCCCCTGGGAACCA	0	4	9	31	0	11	5	0	1	11	24	9	14	10	37	11	8	12	16	7	11	7	8	57	46	4	5	4	5	2	2	2
ID986	LINE/L1	L1-2_BT	CTCCCTGACTATCCCTTCCCCCATCCTTCCCCCTGGTGACCA	14	8	9	240	6	8	9	47	4	7	3	8	7	18	5	12	32	27	5	6	19	15	30	7	88	4	5	16	8	13	25	5
ID987	LINE/L1	L1-2_BT	CTCTACTCAATATTCTGTAATAACCTATATGGGAAAAGAATC	18	11	13	8	8	8	15	9	6	15	16	11	8	0	16	11	9	9	17	3	11	9	9	12	12	12	11	13	12	17	4	13
ID988	LINE/L1	L1-2_BT	CTCTACTCAGTGCTCTGTGGTGACCTAAATGGGAAGGAAATC	101	53	46	18	49	14	93	17	11	42	32	38	63	66	71	40	51	60	28	17	30	56	13	93	15	52	47	55	40	82	5	93
ID989	LINE/L1	L1-2_BT	CTCTGTAATAACCTTATGGTCACCAGGGGGAAGGATGGGGGA	0	13	12	131	7	17	18	12	0	5	6	5	9	17	4	9	32	24	7	8	23	14	24	14	92	10	4	14	4	15	3	8
ID990	LINE/L1	L1-2_BT	CTCTGTAATAACCTTATGGTTCCCAGGGGGAAGGATGGGGGA	10	8	9	28	10	14	3	10	0	12	38	10	27	15	35	10	18	11	11	10	13	18	2	74	37	9	8	9	5	5	1	1
ID991	LINE/L1	L1-2_BT	CTCTTTTTTGGATTTCCTTCCCATTTAGGTCACCACAGAGCA	89	49	55	30	55	21	90	26	30	57	48	59	42	57	95	46	48	53	54	20	45	50	36	85	17	48	55	45	61	74	20	94
ID992	LINE/L1	L1-2_BT	CTGAAACTAACACAACATTGTAAATCAACTATACTCCAATAA	43	28	42	39	39	38	31	32	27	41	29	34	39	40	51	40	36	37	45	20	29	23	41	59	34	29	19	33	17	35	36	34
ID993	LINE/L1	L1-2_BT	CTGACTATCCCTTCCCCCATCCTTCCCCCTGGGAACCATAAG	7	3	7	20	10	7	4	11	1	9	25	4	11	11	26	11	10	11	9	8	7	9	4	43	36	2	4	5	2	1	2	1
ID994	LINE/L1	L1-2_BT	CTGACTATCCCTTCCCCCATCCTTCCCCCTGGTGACCATAAG	9	5	10	103	5	5	9	16	0	5	3	6	7	18	6	8	33	22	4	6	19	12	19	5	88	3	1	12	7	12	3	4
ID995	LINE/L1	L1-2_BT	CTGCCACATAACATTGAGCAGAGTTCCATGTGCTATACAGTA	35	38	25	37	24	29	35	40	32	35	32	34	52	26	56	31	15	12	37	18	26	29	35	45	28	36	33	17	47	37	35	35
ID996	LINE/L1	L1-2_BT	CTGCCACATAACATTGAGCAGAGTTCCCTGTGCTATACAGTA	58	45	36	65	44	33	54	53	52	47	44	55	39	41	51	43	33	47	37	20	25	32	46	78	34	41	44	18	53	68	54	55
ID997	LINE/L1	L1-2_BT	CTGCTCAATACTCTGTAATAACCTTATGGTCACCAGGGGGAA	18	5	6	148	2	14	11	22	0	3	8	1	11	3	3	5	15	24	4	4	21	4	38	21	13	9	0	11	11	13	3	5
ID998	LINE/L1	L1-2_BT	CTGCTCAGTACTCTGTAATAACCTTATGGTCACCAGGGGGAA	3	0	1	0	0	0	0	0	0	0	1	0	0	0	0	0	0	6	0	0	1	0	0	0	84	5	2	0	0	1	0	0
ID999	LINE/L1	L1-2_BT	CTGCTGGACAGCACAGGGAACTCTGCTCAATACTCTGTAATA	25	26	15	144	18	9	14	37	0	6	28	7	15	5	51	2	12	14	10	9	28	10	29	122	25	26	5	10	15	21	9	7
ID1000	LINE/L1	L1-2_BT	CTGCTGTATTTAACATGGAGAACCAGCAAGGACCTGCTGGAC	0	9	8	0	0	13	25	0	0	15	16	20	0	22	33	10	7	15	5	15	12	9	12	87	88	12	6	15	23	25	11	11
ID1001	LINE/L1	L1-2_BT	CTGCTGTGTTTAACATGGAGAACCAGCAAGGACCTGCTGGAC	0	6	9	140	7	7	15	46	0	28	20	16	13	13	11	14	13	25	11	7	12	11	10	22	8	8	21	15	5	14	19	10
ID1002	LINE/L1	L1-2_BT	CTGGACAGCACAGGGAACTCTGCTCAATACTCTGTAATAACC	21	23	13	151	15	10	13	42	0	6	26	4	12	5	48	2	8	15	7	7	25	7	27	119	24	24	4	8	15	19	8	6
ID1003	LINE/L1	L1-2_BT	CTGGATGGGAGGGGAGTTTGGGGGAGAATGGATACATGTATA	131	95	96	83	101	107	98	87	100	94	103	96	83	73	183	85	51	86	101	47	65	61	108	148	94	98	82	53	108	104	105	101
ID1004	LINE/L1	L1-2_BT	CTGGGATGGACATGGACACACTGCTGTATTTAACATGGAGAA	0	10	11	0	0	10	19	0	1	15	17	18	0	14	27	10	22	22	7	12	15	14	10	68	93	11	13	16	23	28	4	7
ID1005	LINE/L1	L1-2_BT	CTGGGATGGACATGGACACACTGCTGTGTTTAACATGGAGAA	17	9	14	150	15	25	8	55	0	23	21	23	19	19	11	11	17	43	28	9	22	18	12	27	9	17	24	13	2	14	6	9
ID1006	LINE/L1	L1-2_BT	CTGGTGACCATAAGGTTATTACAGAGTATTGAGCAGAGTTCC	18	7	8	134	4	13	12	21	1	2	7	0	9	2	5	4	11	22	2	4	19	4	27	19	12	10	0	13	15	15	3	6
ID1007	LINE/L1	L1-2_BT	CTGGTTCTCCATGTTAAACACAGCAGTGTGTCCATGTCCATC	18	11	18	153	15	26	13	54	0	27	28	24	19	24	11	16	18	55	34	11	17	21	13	34	11	19	25	22	6	20	7	13
ID1008	LINE/L1	L1-2_BT	CTGGTTCTCCATGTTAAATACAGCAGTGTGTCCATGTCCATC	30	10	16	12	26	12	28	26	1	16	20	21	10	20	36	22	26	21	7	25	17	14	15	84	92	17	10	19	34	30	5	7
ID1009	LINE/L1	L1-2_BT	CTGTAATAACCTTATGGTCACCAGGGGGAAGGATGGGGGAAG	15	12	11	130	7	14	18	13	0	5	6	5	9	17	3	8	34	23	8	9	24	14	24	14	92	8	4	12	2	13	3	7
ID1010	LINE/L1	L1-2_BT	CTGTAATAACCTTATGGTTCCCAGGGGGAAGGATGGGGGAAG	10	7	9	26	8	12	2	10	0	12	31	10	24	12	36	8	16	11	11	9	13	18	2	74	35	8	8	8	3	4	0	1
ID1011	LINE/L1	L1-2_BT	CTGTACACCTGAAACTAACACAACATTGTAAATCAACTATAC	68	33	57	6	58	53	57	10	7	50	28	36	50	0	97	57	43	51	49	24	29	26	4	109	56	27	16	40	0	52	11	50
ID1012	LINE/L1	L1-2_BT	CTGTACAGCAGAAACTAACACAACATTGTAAAGCAACTATAC	38	23	35	0	32	42	45	3	1	38	21	45	45	24	61	36	24	29	31	13	32	30	3	45	18	8	18	17	22	32	1	47
ID1013	LINE/L1	L1-2_BT	CTGTATAGCACAGGGAACTATATTCAATATCCTGTGATAAAC	22	38	35	39	26	23	18	41	37	52	40	48	45	27	61	31	34	38	58	15	32	32	52	59	44	37	42	33	37	28	45	20
ID1014	LINE/L1	L1-2_BT	CTGTATAGCACAGGGAACTCTACTCAATATTCTGTAATAACC	0	12	10	15	6	7	9	15	9	5	8	11	15	8	16	6	7	10	7	3	6	5	10	21	12	11	8	4	8	11	5	14
ID1015	LINE/L1	L1-2_BT	CTGTATAGCACAGGGAACTCTACTCAGTGCTCTGTGGTGACC	0	15	14	4	14	10	33	5	4	10	14	16	23	18	41	8	18	14	15	5	9	17	10	41	17	14	18	13	16	29	1	32
ID1016	LINE/L1	L1-2_BT	CTGTATAGCACAGGGAACTCTGCTCAATGTTATGTGGCAGCC	0	44	39	56	41	31	66	50	49	49	45	49	39	45	57	37	41	56	42	16	37	24	45	91	37	39	48	22	48	74	53	66
ID1017	LINE/L1	L1-2_BT	CTGTATAGCACATGGAACTCTGCTCAATGTTATGTGGCAGCC	36	37	25	34	25	30	31	37	25	32	33	36	40	23	60	29	20	16	40	16	26	28	32	43	23	34	31	21	38	34	31	27
ID1018	LINE/L1	L1-2_BT	CTGTATTTAACATGGAGAACCAGCAAGGACCTGCTGGACAGC	34	11	10	29	10	18	24	37	1	21	16	19	11	22	33	11	8	13	5	17	17	10	22	91	108	17	7	18	26	28	22	12
ID1019	LINE/L1	L1-2_BT	CTGTCCAGCAGGTCCTTGCTGGTTCTCCATGTTAAACACAGC	24	8	9	292	7	17	18	91	0	28	19	17	12	16	10	15	12	28	12	9	14	11	14	22	10	8	22	17	7	15	57	10
ID1020	LINE/L1	L1-2_BT	CTGTCCAGCAGGTCCTTGCTGGTTCTCCATGTTAAATACAGC	35	10	10	29	10	19	24	37	1	19	16	20	11	22	33	11	8	13	5	17	17	9	22	89	108	17	8	16	25	28	19	12
ID1021	LINE/L1	L1-2_BT	CTGTGAGTCTGTTTCTGTTTTGTAAATAAGTTCATTTGTATC	71	47	62	80	71	60	52	74	53	57	79	74	87	70	107	70	67	50	82	39	66	61	87	111	66	61	49	59	76	60	79	54
ID1022	LINE/L1	L1-2_BT	CTGTGCTGTCCAGCAGGTCCTTGCTGGTTCTCCATGTTAAAC	0	8	9	125	7	14	20	34	0	24	19	21	12	13	10	15	18	21	12	10	15	13	11	23	11	9	20	14	8	14	24	13
ID1023	LINE/L1	L1-2_BT	CTGTGGTGACCTAAATGGGAAGGAAATCCAAAAAAGAGGGGA	67	42	37	21	43	14	64	23	25	40	38	41	34	42	66	32	32	44	43	14	35	39	26	66	10	39	38	35	45	57	19	74
ID1024	LINE/L1	L1-2_BT	CTGTGTTTAACATGGAGAACCAGCAAGGACCTGCTGGACAGC	23	8	9	294	7	17	18	90	0	28	19	18	12	15	10	15	12	27	12	10	14	11	15	22	10	8	22	17	8	15	55	10
ID1025	LINE/L1	L1-2_BT	CTGTTCACCTGAAACTATCACAACATTGTTAATCAGCTATAC	19	28	45	1	40	44	28	2	6	31	40	36	49	29	55	47	30	16	31	19	28	22	5	61	28	29	25	30	34	23	8	25
ID1026	LINE/L1	L1-2_BT	CTGTTCACCTGAAACTATCACAACATTGTTAATTGGCTATAC	18	25	38	7	38	46	23	5	7	43	46	34	45	32	48	43	38	36	24	26	25	26	4	55	44	20	20	32	41	21	6	18
ID1027	LINE/L1	L1-2_BT	CTTAATAGTATACCTTCCATGTTGCTGCAAATGTCAATATTC	0	0	0	0	0	1	0	0	0	16	1	0	0	3	0	0	48	1	19	0	0	4	0	1	0	0	0	300	0	1	0	0
ID1028	LINE/L1	L1-2_BT	CTTATATGTGGAATCTAAAAAGAAATGATACAAATGAACTTA	87	60	53	76	54	59	74	84	64	74	58	63	64	0	101	56	52	66	76	26	61	53	85	110	52	56	46	49	62	90	72	66
ID1029	LINE/L1	L1-2_BT	CTTATTTACAAAACAGAAACAGACTCACAGACATAGAAAACA	34	32	32	32	31	38	26	37	43	41	41	48	44	32	73	29	28	31	40	16	25	22	44	43	34	37	30	25	40	37	49	30
ID1030	LINE/L1	L1-2_BT	CTTCCCCCTGGTGACCATAAGGTTATTACAGAGTACTGAGCA	3	1	1	0	0	0	0	0	0	0	1	0	0	0	0	0	0	5	0	0	1	0	0	0	84	5	3	0	0	1	0	0
ID1031	LINE/L1	L1-2_BT	CTTCCCCCTGGTGACCATAAGGTTATTACAGAGTATTGAGCA	0	5	6	148	2	13	11	22	0	3	8	1	10	3	4	5	15	24	4	4	22	4	38	21	13	9	0	11	9	12	3	5
ID1032	LINE/L1	L1-2_BT	CTTGCTGGTTCTCCATGTTAAACACAGCAGTGTGTCCATGTC	23	13	18	145	14	27	13	53	0	27	30	25	22	21	13	16	18	56	33	12	16	26	14	33	8	18	25	23	8	21	7	15
ID1033	LINE/L1	L1-2_BT	CTTGCTGGTTCTCCATGTTAAATACAGCAGTGTGTCCATGTC	0	11	16	14	26	11	29	28	1	16	21	18	10	20	35	24	19	26	7	24	21	14	14	83	87	17	11	19	36	30	6	9
ID1034	LINE/L1	L1-2_BT	CTTGTTGGTTATCCATTTTAAATATAGCAGTGTGTACATGTC	0	68	61	0	0	0	79	0	49	64	0	76	0	49	109	55	50	65	60	24	71	38	54	107	72	66	43	55	60	93	60	88
ID1035	LINE/L1	L1-2_BT	CTTTACAATGTTGTGTTAGTTTCTGCTGTACAGCAAAGTGAA	70	41	60	0	43	61	66	1	0	56	34	57	65	37	102	54	35	43	51	24	41	34	1	67	28	13	29	34	32	61	1	74
ID1036	LINE/L1	L1-2_BT	CTTTATCCATTCATCTGTTGATGGACATTTAGGTTGCTTCCA	0	43	44	52	0	40	68	0	43	53	52	48	40	38	65	43	44	43	40	17	48	37	63	63	40	37	28	39	39	61	45	59
ID1037	LINE/L1	L1-2_BT	CTTTGCTATACACCTGAAACTAACACAACATTGTAAATCAAC	11	11	25	26	19	28	12	30	34	22	24	19	24	18	30	15	15	15	15	9	21	17	36	29	21	9	17	15	5	16	25	15
ID1038	LINE/L1	L1-2_BT	CTTTGCTGTACACCTGAAACTAACACAACATTGTAAATCAAC	94	50	66	10	70	72	70	11	11	72	55	51	78	57	139	65	53	77	77	26	50	49	6	160	84	35	39	51	0	82	15	64
ID1039	LINE/L1	L1-2_BT	CTTTGCTGTACAGCAGAAACTAACACAACATTGTAAAGCAAC	63	34	57	1	51	65	59	4	2	49	35	48	64	36	92	52	35	39	41	28	41	33	3	54	19	13	23	36	36	53	2	66
ID1040	LINE/L1	L1-2_BT	CTTTGCTGTACAGCAGAAACTAACACAACATTGTAAATCAAC	36	17	20	0	25	24	29	0	2	24	19	28	29	19	45	17	12	29	26	6	18	16	1	45	27	19	8	10	15	35	1	26
ID1041	LINE/L1	L1-2_BT	CTTTGCTGTATACCTGAAACTAACACAACATTGTAAATCAAC	34	33	30	9	32	40	33	11	15	33	29	37	36	25	54	30	30	35	30	18	31	30	11	57	28	31	20	22	2	34	14	35
ID1042	LINE/L1	L1-2_BT	CTTTTCCATTATGGTTTATCACAGGATATTGAATATAGTTCC	57	58	56	71	48	40	44	63	72	78	73	75	66	51	90	50	52	66	81	25	59	55	90	104	53	59	49	52	58	43	75	46
ID1043	LINE/L1	L1-2_BT	GAAACAGACTCACAGACATAGAAAACAAACTTATGGTTACCA	31	23	25	14	22	15	21	16	15	26	31	31	29	22	37	23	27	19	23	5	23	20	23	33	26	23	21	27	27	28	19	21
ID1044	LINE/L1	L1-2_BT	GAAACTAACACAACATTGTAAAGCAACTATACTCCAATAAAA	63	30	54	25	63	63	62	19	27	61	48	56	80	44	116	69	39	39	60	22	63	45	29	97	36	14	49	29	49	55	34	66
ID1045	LINE/L1	L1-2_BT	GAAACTAACACAACATTGTAAATCAACTACACTCCAATAAAA	11	4	10	10	10	12	11	9	3	22	9	14	10	8	12	11	4	15	21	4	9	4	9	9	6	6	5	6	5	13	14	7
ID1046	LINE/L1	L1-2_BT	GAAACTAACACAACATTGTAAATCAACTATACTCCAATAAAA	68	51	68	55	63	59	55	49	43	62	40	53	62	51	93	62	42	61	64	37	48	38	58	106	44	48	34	38	35	60	49	61
ID1047	LINE/L1	L1-2_BT	GAAACTAACACAACATTGTAAATCAACTATACTTCAATAAAA	0	16	28	41	25	25	27	38	23	29	22	23	29	22	43	23	15	27	34	10	28	28	33	44	26	14	11	22	17	25	33	32
ID1048	LINE/L1	L1-2_BT	GAAAGACAAATACCATATGATATCACTTATATGTGGAATCTA	76	24	39	47	44	57	45	56	50	49	41	56	41	37	65	47	33	41	47	22	28	32	63	75	38	37	32	32	47	68	58	50
ID1049	LINE/L1	L1-2_BT	GAAAGACAAATATCATATGATATCACTTATATGTGGAATCTA	0	28	28	33	20	21	32	37	25	28	37	26	36	23	63	35	14	28	29	18	22	20	41	54	33	29	33	22	29	44	35	31
ID1050	LINE/L1	L1-2_BT	GAACCAGCAAGGACCTGCTGGACAGCACAGGGAACTCTGCTC	0	47	49	0	0	25	40	0	1	58	51	46	0	41	47	2	36	28	22	30	53	44	50	130	204	44	18	38	44	45	35	27
ID1051	LINE/L1	L1-2_BT	GAACTATATTCAATATCCTGTGATAAACCATAATGGAAAAGA	61	61	63	76	51	46	51	65	74	81	75	81	69	55	98	54	53	68	79	29	67	64	92	114	55	59	53	55	64	44	80	51
ID1052	LINE/L1	L1-2_BT	GAACTCTACTCAGTGCTCTGTGGTGACCTAAATGGGAAGGAA	0	51	41	15	44	12	93	14	9	38	34	43	55	57	75	33	51	58	29	13	25	64	10	92	15	46	48	53	36	84	6	92
ID1053	LINE/L1	L1-2_BT	GAACTCTGCTCAATGTTATGTGGCAGCCTGGATGGGAGGGGA	150	120	112	123	113	123	153	117	123	113	112	124	129	80	204	121	76	110	111	65	85	74	129	191	88	115	92	68	130	151	138	147
ID1054	LINE/L1	L1-2_BT	GAACTTATTTACAAAACAGAAACAGACTCACAGACATAGAAA	35	27	36	41	32	41	28	41	43	38	35	50	39	0	68	27	31	30	36	12	21	27	49	50	27	36	32	30	37	35	50	33
ID1055	LINE/L1	L1-2_BT	GAAGGATGGGGGAAGGGATAGTCAGGGAGTCTGGGATGGACA	22	14	18	278	25	25	18	105	7	22	19	13	25	29	24	17	50	42	18	13	29	26	54	61	165	17	11	30	14	15	28	10
ID1056	LINE/L1	L1-2_BT	GAAGGGACTCAGCCATACATATACATGTATCCATTCTCCCCC	65	57	54	40	58	62	56	37	55	69	68	42	53	54	81	58	11	54	55	28	63	37	49	75	53	53	64	8	69	65	60	64
ID1057	LINE/L1	L1-2_BT	GAAGTATAGTTGATTTACAATGTTGTGTTAGTTTCAGGTGTA	30	9	25	28	21	27	20	19	16	26	14	21	29	13	40	20	21	34	17	12	16	10	19	40	31	8	7	16	3	29	17	21
ID1058	LINE/L1	L1-2_BT	GAATATAGTTCCCTGTGCTATACAGTAGGACCTTGTTGTTTA	29	57	46	62	46	40	27	49	55	51	47	54	75	36	92	48	47	36	68	24	19	40	65	91	47	54	40	38	64	33	63	27
ID1059	LINE/L1	L1-2_BT	GAATGGAATATTGACATTTGCAGCAACATGGAAGGTATACTA	0	0	0	0	0	1	18	0	0	16	1	0	0	2	0	0	47	4	17	0	0	4	0	1	0	0	0	317	0	1	0	2
ID1060	LINE/L1	L1-2_BT	GAATGGATAAACAACAAGGTCCTACTGTATAGCACAGGGAAC	24	16	19	32	18	15	12	26	25	21	13	22	28	21	38	22	23	17	26	11	9	19	44	45	11	16	21	19	23	16	35	11
ID1061	LINE/L1	L1-2_BT	GACAGCACAGGGAACTCTGCTCAATACTCTGTAATAACCTTA	19	18	11	75	10	9	11	17	0	5	23	4	12	4	37	3	8	11	7	5	19	6	17	83	23	13	3	9	9	19	1	4
ID1062	LINE/L1	L1-2_BT	GACCTACTGTATAGCACAGGGAACTCTACTCAATATTCTGTA	17	15	13	21	10	3	13	20	6	10	13	21	15	9	23	7	9	9	13	1	8	6	20	25	20	14	12	7	10	16	10	14
ID1063	LINE/L1	L1-2_BT	GACCTGCTGGACAGCACAGGGAACTCTGCTCAATACTCTGTA	30	22	14	142	16	7	15	36	0	6	33	6	15	7	54	2	17	14	7	6	33	9	27	127	29	21	4	16	20	23	7	9
ID1064	LINE/L1	L1-2_BT	GACTCCCTGACTATCCCTTCCCCCATCCTTCCCCCTGGGAAC	3	5	5	30	11	7	2	19	0	9	21	7	8	7	23	9	8	12	11	6	8	7	7	44	45	5	6	4	2	1	1	1
ID1065	LINE/L1	L1-2_BT	GACTCCCTGACTATCCCTTCCCCCATCCTTCCCCCTGGTGAC	0	7	7	239	4	9	7	0	4	7	2	7	4	16	4	7	27	19	7	3	15	10	30	4	87	4	5	15	8	7	21	2
ID1066	LINE/L1	L1-2_BT	GAGAAAGACAAATACCATATGATATCACTTATATGTGGAATC	70	21	36	44	40	50	38	47	43	38	37	44	37	35	56	43	29	33	38	18	21	31	58	62	38	26	33	31	39	56	51	46
ID1067	LINE/L1	L1-2_BT	GAGAAAGACAAATATCATATGATATCACTTATATGTGGAATC	44	29	30	39	22	22	31	42	32	34	36	28	39	33	65	39	13	29	32	19	22	26	55	50	34	30	29	23	31	44	39	26
ID1068	LINE/L1	L1-2_BT	GAGAACCAGCAAGGACCTGCTGGACAGCACAGGGAACTCTGC	42	49	49	187	28	24	41	60	0	55	54	45	43	0	52	2	32	27	24	36	52	47	48	127	206	44	19	39	49	46	36	26
ID1069	LINE/L1	L1-2_BT	GAGCAGAGTTCCATGTGCTATACAGTAGGTCCTTGTTGGTTA	46	22	16	37	17	30	41	33	27	37	31	34	45	26	59	15	27	12	40	6	30	31	43	62	41	20	23	37	25	38	29	50
ID1070	LINE/L1	L1-2_BT	GAGCAGAGTTCCCTGTGCTATACAGTAGGTCCTTGTTGGTTA	94	77	46	68	55	39	89	67	62	77	63	62	78	70	83	47	63	79	77	24	62	49	74	124	44	74	54	59	74	92	86	89
ID1071	LINE/L1	L1-2_BT	GAGGGGAGTTTGGGGGAGAATGGATACATGTATATGTATGGC	92	70	62	35	67	87	75	39	61	80	75	71	57	58	113	61	42	64	72	32	58	42	45	103	72	66	47	45	64	84	66	80
ID1072	LINE/L1	L1-2_BT	GAGTAGAGTTCCCTGTGCTATACAGTAGGTTCTCATTAGTTA	32	22	22	26	17	15	35	24	31	13	3	28	42	25	23	13	18	25	23	6	13	17	20	31	17	24	16	25	21	24	17	31
ID1073	LINE/L1	L1-2_BT	GAGTATAGTTGCTTTACAATGTTGTGTTAGTTTCTGCTGTAC	40	24	36	0	35	34	41	3	0	40	27	48	42	27	71	35	23	23	39	16	38	23	2	57	20	11	22	18	23	33	0	44
ID1074	LINE/L1	L1-2_BT	GAGTCCCTTTGCTGTCCACCTGAAACTATCACAACATTGTTA	0	57	73	27	62	93	72	34	31	72	88	91	88	71	103	73	46	70	76	40	71	57	38	116	80	52	58	2	86	75	38	75
ID1075	LINE/L1	L1-2_BT	GAGTCCCTTTGCTGTTCACCTGAAACTATCACAACATTGTTA	43	37	57	6	42	61	43	9	10	57	69	38	74	69	78	59	75	46	29	33	46	48	10	77	43	37	48	60	51	47	11	37
ID1076	LINE/L1	L1-2_BT	GATAACCAACAAGGACCTACTGTATAGCACAGGGAACTCTAC	0	18	14	20	8	11	16	16	11	10	5	15	20	10	22	5	10	13	10	2	6	12	17	21	14	16	7	10	17	16	25	14
ID1077	LINE/L1	L1-2_BT	GATAACCAACAAGGACCTACTGTATAGCACAGGGAACTCTGC	88	65	38	66	45	33	74	64	57	74	52	58	68	61	78	39	55	70	75	20	47	39	73	116	43	62	49	48	64	84	76	79
ID1078	LINE/L1	L1-2_BT	GATAACCAACAAGGACCTACTGTATAGCACATGGAACTCTGC	52	23	17	34	15	36	45	35	25	38	26	35	47	27	60	18	30	13	42	6	28	30	42	61	37	20	22	31	30	37	31	53
ID1079	LINE/L1	L1-2_BT	GATAACTAATGAGAACCTACTGTATAGCACAGGGAACTCTAC	0	17	21	27	14	16	29	24	21	17	0	26	33	22	13	11	18	21	24	5	15	14	9	14	11	19	9	24	20	23	19	24
ID1080	LINE/L1	L1-2_BT	GATACCTCATTGTAGTTTTGATTTGCATTTCTCTAATAATTA	88	50	47	64	52	53	53	72	66	53	60	64	56	48	97	56	44	52	72	24	46	46	72	88	58	49	32	42	52	72	71	54
ID1081	LINE/L1	L1-2_BT	GATAGTCAGGGAGTCTGGGATGGACATGGACACACTGCTGTA	16	8	18	15	12	5	15	31	1	16	14	15	18	11	25	11	17	22	16	11	21	11	19	52	131	9	9	19	25	15	2	8
ID1082	LINE/L1	L1-2_BT	GATAGTTAGGGAGTTTGGGATGGACATGTACACACTGCTATA	50	35	33	34	39	55	45	37	25	38	42	47	46	31	74	32	31	35	47	21	34	32	43	54	32	29	32	38	31	52	35	42
ID1083	LINE/L1	L1-2_BT	GATATCACTTATATGTGGAATCTAAAATATGACACAAATGAA	46	21	30	44	29	29	25	47	57	33	35	41	28	24	70	28	18	25	33	15	31	26	55	69	52	27	30	19	23	53	55	24
ID1084	LINE/L1	L1-2_BT	GATGCAAACTATTATATATAGAATGGATAAACAACAAGGTCC	5	1	6	12	7	8	7	14	16	7	8	12	14	3	15	8	3	5	6	3	7	6	19	17	6	2	12	3	12	5	18	10
ID1085	LINE/L1	L1-2_BT	GATGCTCAACATCACTAATTATTAGAGAAATGCAAATCAAAA	97	70	84	91	70	65	80	78	79	66	86	72	65	66	121	84	51	92	69	38	69	57	100	124	71	72	53	54	74	92	84	83
ID1086	LINE/L1	L1-2_BT	GATGGACATGTACACACTGCTATATTTAAAATGGATAACCAA	68	48	54	45	41	68	68	45	38	58	54	66	65	0	85	47	38	58	64	21	49	42	47	94	55	47	37	47	50	86	46	69
ID1087	LINE/L1	L1-2_BT	GATGGGGGAAGGGATAGTCAGGGAGTCTGGGATGGACATGGA	21	12	27	289	34	25	18	108	7	23	18	16	27	31	25	20	51	47	21	19	30	25	56	57	167	15	12	34	13	17	30	10
ID1088	LINE/L1	L1-2_BT	GATTCACTTTGCTGTACAGCAGAAACTAACACAACATTGTAA	97	55	77	0	66	72	87	1	2	82	40	73	79	54	145	68	43	63	81	35	57	45	3	103	62	32	37	41	51	89	1	97
ID1089	LINE/L1	L1-2_BT	GATTTACAATGTTGTGTTAATTTCTGCTGTACAGCAAAGTGA	66	40	52	8	60	51	51	8	8	51	46	54	47	41	63	47	45	55	55	21	34	35	9	79	37	48	31	42	28	59	6	59
ID1090	LINE/L1	L1-2_BT	GATTTACAATGTTGTGTTAGTTTCAGGTGTACAGCAAAGTGA	93	54	72	8	76	70	60	10	13	78	58	61	85	58	150	65	55	75	75	28	47	56	5	160	78	40	51	54	3	88	14	58
ID1091	LINE/L1	L1-2_BT	GATTTACAATGTTGTGTTAGTTTCTGCTGTACAGCAAAGTGA	37	18	24	1	29	22	29	2	3	25	19	25	32	16	53	19	17	29	31	9	24	20	2	48	32	19	12	16	17	35	2	28
ID1092	LINE/L1	L1-2_BT	GCAAAGGGACTCAGCCATACATATACATGTATCCATTCTCCC	93	77	91	28	84	98	80	34	54	81	98	73	69	0	126	77	55	68	73	44	71	53	48	126	63	70	61	53	96	82	66	90
ID1093	LINE/L1	L1-2_BT	GCAGAAACTAACACAACATTGTAAAGCAACTATACTCCAATA	46	17	31	11	32	39	38	12	13	38	28	42	46	20	70	37	19	25	34	12	32	31	13	69	25	10	27	22	29	34	14	40
ID1094	LINE/L1	L1-2_BT	GCAGCACTATTTACAATAGCCAAGACATGGAAGCAACCTAAA	53	33	29	40	24	48	36	31	42	32	51	33	34	30	53	26	30	41	44	17	38	30	55	59	40	32	24	28	44	37	43	37
ID1095	LINE/L1	L1-2_BT	GCCTGGATGGGAGGGGAGTTTGGGGGAGAATGGATACATGTA	0	93	97	107	0	116	111	0	95	89	98	103	79	81	181	88	60	99	108	47	72	61	100	149	83	101	78	61	105	119	105	118
ID1096	LINE/L1	L1-2_BT	GCTATACACCTGAAACTAACACAACATTGTAAATCAACTATA	13	8	24	32	19	30	18	33	26	30	18	16	30	17	24	18	17	16	20	8	21	14	39	21	24	11	9	17	3	19	23	16
ID1097	LINE/L1	L1-2_BT	GCTATACAGTAGGACCTTGTTGTTTATCCATTCTATATATAA	15	7	12	13	11	20	10	6	7	13	13	11	19	0	17	12	7	7	18	6	10	11	20	18	7	7	13	8	10	9	13	11
ID1098	LINE/L1	L1-2_BT	GCTCAACATCACTAATTATTAGAGAAATGCAAATCAAAACTA	79	55	62	68	58	52	61	61	67	55	69	67	59	48	96	64	40	70	52	29	58	48	90	97	71	53	39	40	54	67	74	64
ID1099	LINE/L1	L1-2_BT	GCTGGACAGCACAGGGAACTCTGCTCAATACTCTGTAATAAC	22	24	14	150	17	10	14	40	0	6	27	5	13	6	50	2	8	14	9	7	25	8	28	120	26	25	5	8	16	19	8	7
ID1100	LINE/L1	L1-2_BT	GCTGTACACCTGAAACTAACACAACATTGTAAATCAACTATA	77	34	63	11	63	59	61	12	6	47	41	39	64	46	111	59	47	58	57	26	33	38	3	126	74	26	21	45	0	67	13	55
ID1101	LINE/L1	L1-2_BT	GCTGTACAGCAGAAACTAACACAACATTGTAAAGCAACTATA	47	27	38	0	39	52	50	3	1	43	23	44	54	27	73	39	30	39	37	20	33	27	2	48	19	12	23	25	25	33	1	56
ID1102	LINE/L1	L1-2_BT	GCTGTACAGCAGAAACTAACACAACATTGTAAATCAACTATA	27	14	21	1	21	26	27	0	1	18	13	26	24	14	39	19	8	22	13	8	15	10	1	40	22	12	8	9	10	29	1	27
ID1103	LINE/L1	L1-2_BT	GCTGTTCACCTGAAACTATCACAACATTGTTAATTGGCTATA	7	14	16	3	17	20	13	1	3	20	27	12	23	17	23	19	18	18	11	12	16	11	3	37	25	10	7	15	14	8	3	9
ID1104	LINE/L1	L1-2_BT	GCTTTACAATGTTGTGTTAGTTTCTGCTGTACAGCAAAGTGA	73	41	57	1	46	67	71	2	0	63	36	51	68	38	106	57	36	45	57	26	49	34	1	64	25	14	29	36	36	63	1	80
ID1105	LINE/L1	L1-2_BT	GGAACTCTACTCAGTGCTCTGTGGTGACCTAAATGGGAAGGA	83	44	33	15	37	8	85	11	9	33	28	38	45	0	73	28	43	54	24	9	22	58	11	82	14	43	39	40	32	77	5	85
ID1106	LINE/L1	L1-2_BT	GGAAGCAACCTAAATGTCCATCAACAGATGAATGGATAAAGA	70	45	48	56	38	42	77	62	47	55	55	53	41	41	69	52	44	50	44	19	52	39	66	70	45	38	32	42	42	68	48	67
ID1107	LINE/L1	L1-2_BT	GGAAGGATGGGGGAAGGGATAGTCAGGGAGTCTGGGATGGAC	0	14	17	0	0	0	19	0	7	0	0	15	0	31	29	18	0	39	18	12	29	29	55	58	161	15	11	31	18	14	26	12
ID1108	LINE/L1	L1-2_BT	GGAATATTGACATTTGCAGCAACATGGAAGGTATACTATTAA	0	0	0	0	0	1	0	0	0	15	1	0	0	2	0	0	51	1	18	0	0	4	0	1	0	0	0	322	0	1	0	0
ID1109	LINE/L1	L1-2_BT	GGACATGGACACACTGCTGTATTTAACATGGAGAACCAGCAA	37	11	16	14	26	11	28	28	1	17	21	19	11	0	37	23	19	26	7	24	20	14	14	83	87	17	12	19	36	31	6	9
ID1110	LINE/L1	L1-2_BT	GGACATGGACACACTGCTGTGTTTAACATGGAGAACCAGCAA	21	13	18	146	14	27	14	53	0	27	30	25	22	23	15	16	18	58	33	12	16	24	13	33	8	19	27	22	8	21	7	14
ID1111	LINE/L1	L1-2_BT	GGACATGTACACACTGCTATATTTAAAATGGATAACCAACAA	70	54	49	44	44	59	60	53	37	50	53	65	69	41	84	44	33	52	52	18	50	34	44	84	62	47	36	44	47	80	42	68
ID1112	LINE/L1	L1-2_BT	GGACTCAGCCATACATATACATGTATCCATTCTCCCCCAAAC	0	97	99	0	0	0	91	0	87	99	0	76	0	74	155	99	42	75	91	48	75	43	67	150	88	83	74	49	100	99	99	100
ID1113	LINE/L1	L1-2_BT	GGAGTATAGTTGATTTACAATGTTGTGTTAGTTTCAGGTGTA	44	16	28	25	32	39	36	26	22	33	23	34	32	29	65	27	30	37	35	13	32	22	28	74	43	12	18	29	3	33	19	36
ID1114	LINE/L1	L1-2_BT	GGAGTATAGTTGCTTTACAATGTTGTGTTAGTTTCTGCTGTA	42	27	37	4	36	37	45	3	2	44	27	52	44	27	71	39	22	27	41	16	33	20	5	64	24	13	24	19	26	35	3	49
ID1115	LINE/L1	L1-2_BT	GGAGTTTGGGATTAACATATACACACTACTATATATAAAATA	26	14	15	14	16	19	24	11	16	18	18	16	22	0	28	16	5	15	20	7	10	8	17	28	22	9	8	11	17	18	24	20
ID1116	LINE/L1	L1-2_BT	GGATAAACAACAAGGTCCTACTGTATAGCACAGGGAACTATA	37	48	40	45	42	42	25	37	45	38	32	34	56	30	80	41	42	30	53	20	16	37	54	79	32	50	38	38	60	32	51	22
ID1117	LINE/L1	L1-2_BT	GGATACATGTATATGTATGGCTGAGTCCCTTCACTGTTCACC	42	36	43	10	45	50	34	12	17	45	57	39	36	52	62	43	10	42	56	22	48	31	14	66	48	43	42	9	46	35	21	28
ID1118	LINE/L1	L1-2_BT	GGATACATGTATATGTATGGCTGAGTCCCTTTGCTGTTCACC	0	32	38	0	0	52	35	0	11	39	41	25	0	31	57	44	30	39	15	26	22	25	8	70	42	30	36	30	45	42	11	39
ID1119	LINE/L1	L1-2_BT	GGATGGACATGGACACACTGCTGTATTTAACATGGAGAACCA	0	14	20	0	0	0	35	0	1	0	0	22	0	20	59	23	0	32	9	27	19	15	16	104	94	22	12	17	40	37	5	10
ID1120	LINE/L1	L1-2_BT	GGATGGACATGGACACACTGCTGTGTTTAACATGGAGAACCA	24	15	19	155	20	26	15	52	0	27	29	25	23	24	19	18	18	59	34	13	20	22	14	45	11	21	25	17	6	21	7	15
ID1121	LINE/L1	L1-2_BT	GGATGGACATGTACACACTGCTATATTTAAAATGGATAACCA	71	50	53	51	44	62	65	51	47	62	52	74	57	47	84	45	34	64	67	21	51	46	45	92	60	48	36	45	50	89	48	67
ID1122	LINE/L1	L1-2_BT	GGATTTCCTTCCCATTTAGGTCACCACAGAGCACTGAGTAGA	0	47	44	19	40	12	88	18	12	40	37	40	63	59	71	38	49	67	24	17	31	47	15	86	15	50	39	48	43	81	4	87
ID1123	LINE/L1	L1-2_BT	GGCAGCCTGGATGGGAGGGGAGTTTGGGGGAGAATGGATACA	202	140	140	143	145	145	157	138	126	130	125	140	117	121	203	122	107	121	133	69	98	94	148	202	131	144	111	89	150	154	133	163
ID1124	LINE/L1	L1-2_BT	GGGAACTATATTCAATATCCTGTGATAAACCATAATGGAAAA	56	62	60	74	49	47	39	64	75	84	69	75	72	49	92	47	52	72	82	28	58	59	90	99	50	63	54	51	52	48	68	41
ID1125	LINE/L1	L1-2_BT	GGGAACTCTGCTCAATACTCTGTAATAACCTTATGGTCACCA	17	6	8	136	3	13	11	20	1	2	7	0	10	2	7	4	11	21	2	4	19	4	29	19	11	10	0	13	12	15	3	6
ID1126	LINE/L1	L1-2_BT	GGGAAGGATGGGGGAAGGGATAGTCAGGGAGTCTGGGATGGA	20	13	15	307	25	28	18	125	8	23	18	16	25	26	31	18	60	38	20	12	30	27	52	58	159	15	12	32	17	13	25	13
ID1127	LINE/L1	L1-2_BT	GGGAAGGGATAGTCAGGGAGTCTGGGATGGACATGGACACAC	26	16	44	331	35	28	23	128	4	33	23	35	37	28	28	25	47	57	25	19	41	25	63	69	181	25	19	35	28	22	26	19
ID1128	LINE/L1	L1-2_BT	GGGACTCAGCCATACATATACATGTATCCATTCTCCCCCAAA	0	104	104	0	0	109	95	0	88	104	116	91	0	80	169	107	51	86	92	47	87	60	75	163	88	90	77	52	114	109	99	103
ID1129	LINE/L1	L1-2_BT	GGGAGTTTGGGGGAGAATGGATACATGTATATGTATGGCTGA	114	82	83	39	82	102	78	45	60	88	86	77	64	67	136	83	43	70	76	42	68	42	50	134	73	80	54	44	83	98	77	89
ID1130	LINE/L1	L1-2_BT	GGGATAGTTAGGGAGTTTGGGATGGACATGTACACACTGCTA	0	31	29	0	0	46	46	0	28	33	32	39	0	26	69	29	27	27	35	18	28	21	41	49	28	26	28	32	27	50	36	41
ID1131	LINE/L1	L1-2_BT	GGGATGGACATGGACACACTGCTGTATTTAACATGGAGAACC	0	16	19	0	0	13	38	0	1	18	23	19	0	20	61	22	28	33	9	25	17	15	16	99	93	23	12	17	40	40	4	15
ID1132	LINE/L1	L1-2_BT	GGGATGGACATGGACACACTGCTGTGTTTAACATGGAGAACC	25	15	19	152	20	26	15	52	0	26	28	26	23	24	20	18	20	56	34	12	22	22	14	41	11	21	25	18	6	21	8	17
ID1133	LINE/L1	L1-2_BT	GGGATGGACATGTACACACTGCTATATTTAAAATGGATAACC	69	48	52	54	40	58	66	49	41	62	47	70	57	43	79	45	34	63	68	21	47	45	43	88	60	46	36	44	46	90	49	68
ID1134	LINE/L1	L1-2_BT	GGGGAAGGGATAGTCAGGGAGTCTGGGATGGACATGGACACA	26	16	44	336	35	28	26	128	4	31	23	33	38	0	27	23	47	56	22	18	39	25	65	68	182	25	18	39	28	23	28	19
ID1135	LINE/L1	L1-2_BT	GGGGGAAGGGATAGTCAGGGAGTCTGGGATGGACATGGACAC	23	15	33	318	34	28	20	121	4	28	22	27	36	33	27	20	50	55	24	18	36	24	68	67	175	18	18	34	13	22	32	14
ID1136	LINE/L1	L1-2_BT	GGTCCTTGCTGGTTCTCCATGTTAAACACAGCAGTGTGTCCA	27	10	17	150	14	29	15	59	0	27	32	26	24	23	15	16	20	58	27	10	13	31	14	33	10	15	24	30	10	21	7	11
ID1137	LINE/L1	L1-2_BT	GGTCCTTGCTGGTTCTCCATGTTAAATACAGCAGTGTGTCCA	38	14	19	19	28	16	31	30	1	21	19	16	8	24	34	29	17	26	7	25	22	13	14	82	89	18	12	22	41	29	7	11
ID1138	LINE/L1	L1-2_BT	GGTCCTTGTTGGTTATCCATTTTAAATATAGCAGTGTGTACA	116	86	72	72	72	94	100	74	74	80	69	78	98	61	123	70	65	80	78	29	71	53	75	110	81	83	49	72	81	111	88	99
ID1139	LINE/L1	L1-2_BT	GGTGACCTAAATGGGAAGGAAATCCAAAAAAGAGGGGATATA	55	32	27	18	37	11	56	21	21	42	32	44	32	46	70	30	31	44	41	13	33	32	17	65	12	30	30	39	32	47	12	67
ID1140	LINE/L1	L1-2_BT	GGTGATACCTCATTGTAGTTTTGATTTGCATTTCTCTAATAA	0	81	89	0	0	106	104	0	84	85	89	94	0	76	130	96	76	94	104	36	63	57	119	135	82	87	51	72	79	122	97	106
ID1141	LINE/L1	L1-2_BT	GGTTTATCACAGGATATTGAATATAGTTCCCTGTGCTATACA	21	44	34	44	32	21	19	41	42	49	40	53	43	0	65	33	34	37	57	15	31	32	57	59	43	38	40	32	33	25	48	22
ID1142	LINE/L1	L1-2_BT	GTATAACTGAATCACTTTGCTGTACACCTGAAACTAACACAA	51	32	41	2	45	31	41	3	7	53	47	32	49	31	107	47	28	54	48	22	32	34	4	115	68	28	29	29	3	53	10	52
ID1143	LINE/L1	L1-2_BT	GTATAGCACAGGGAACTATATTCAATATCCTGTGATAAACCA	0	45	34	44	32	23	22	44	46	48	42	55	43	33	64	33	35	40	56	17	31	34	63	63	41	40	43	32	34	29	48	23
ID1144	LINE/L1	L1-2_BT	GTATAGCACAGGGAACTCTACTCAATATTCTGTAATAACCTA	15	11	10	18	7	5	11	17	11	8	11	17	11	10	20	5	7	16	13	3	7	6	12	26	12	10	9	3	8	15	4	18
ID1145	LINE/L1	L1-2_BT	GTATAGCACAGGGAACTCTACTCAGTGCTCTGTGGTGACCTA	0	14	16	3	12	9	38	5	3	10	11	15	23	18	42	6	19	14	16	4	8	15	11	42	17	16	15	11	13	29	1	36
ID1146	LINE/L1	L1-2_BT	GTATATGTATAACTGAATCACTTTGCTGTACACCTGAAACTA	0	27	34	4	29	31	24	3	3	31	43	14	49	24	75	33	26	41	30	12	18	24	4	85	36	25	18	17	20	41	6	31
ID1147	LINE/L1	L1-2_BT	GTATATGTATGGCTGAGTCCCTTTGCTGTTCACCTGAAACTA	41	25	61	4	56	55	38	4	13	53	60	28	70	0	80	65	48	40	26	39	24	43	7	83	56	29	39	48	58	44	6	39
ID1148	LINE/L1	L1-2_BT	GTATCCATTCTCCCCCAAACTCCCCTCCCATCCAGGCTGCCA	0	136	144	142	137	147	160	134	137	140	134	143	126	122	213	123	111	121	138	67	102	90	157	208	133	140	113	88	147	151	128	168
ID1149	LINE/L1	L1-2_BT	GTATGATAATCTCTAGGTCCATCCATGTTGCTGCAAATGGCA	142	55	53	75	57	41	41	65	68	48	68	112	46	57	140	59	37	56	49	29	64	60	72	132	76	49	49	39	63	114	60	36
ID1150	LINE/L1	L1-2_BT	GTATGGCTGAGTCCCTTTGCTGTTCACCTGAAACTATCACAA	39	22	61	6	52	58	40	8	9	58	48	38	71	60	79	64	47	47	34	37	29	43	9	90	56	28	43	41	53	47	8	42
ID1151	LINE/L1	L1-2_BT	GTATTTAACATGGAGAACCAGCAAGGACCTGCTGGACAGCAC	29	12	10	21	8	14	25	14	0	23	17	20	12	0	28	11	6	13	5	17	18	10	17	90	109	18	7	16	26	28	7	13
ID1152	LINE/L1	L1-2_BT	GTCAGGGAGTCTGGGATGGACATGGACACACTGCTGTATTTA	19	9	16	18	12	7	15	40	1	15	16	17	16	9	21	9	25	20	15	8	15	16	22	62	147	8	15	16	29	15	4	7
ID1153	LINE/L1	L1-2_BT	GTCAGGGAGTCTGGGATGGACATGGACACACTGCTGTGTTTA	11	6	8	200	17	21	9	90	0	27	23	30	17	23	10	10	21	36	30	7	19	27	19	22	15	13	20	17	4	9	10	11
ID1154	LINE/L1	L1-2_BT	GTCTGTGAGTCTATTTCTGTTTTGTAAATAAGTTCATTTGTA	47	22	31	31	30	39	32	29	33	32	39	44	43	19	54	23	19	28	39	15	24	25	41	52	31	20	25	23	29	41	40	33
ID1155	LINE/L1	L1-2_BT	GTCTGTGAGTCTGTTTCTGTTTTGTAAATAAGTTCATTTGTA	79	52	75	83	82	76	57	89	62	64	81	69	96	0	122	79	86	55	88	42	60	69	87	144	71	70	59	74	82	69	71	58
ID1156	LINE/L1	L1-2_BT	GTGAACAGCAAAGGGACTCAGCCATACATATACATGTATCCA	49	30	36	5	44	50	39	5	11	40	46	29	46	0	60	40	26	41	14	23	24	22	10	74	40	29	40	27	40	37	13	43
ID1157	LINE/L1	L1-2_BT	GTGAACAGTGAAGGGACTCAGCCATACATATACATGTATCCA	46	39	46	12	47	54	36	15	20	48	56	43	38	55	64	44	10	41	60	23	47	32	15	70	51	43	44	9	44	37	25	29
ID1158	LINE/L1	L1-2_BT	GTGCTCTGTGGTGACCTAAATGGGAAGGAAATCCAAAAAAGA	74	37	35	23	43	17	74	18	20	44	31	45	41	45	75	34	38	41	38	16	29	39	24	72	10	33	43	41	43	65	12	78
ID1159	LINE/L1	L1-2_BT	GTGCTGTCCAGCAGGTCCTTGCTGGTTCTCCATGTTAAACAC	23	8	9	165	7	14	19	58	0	25	20	21	12	15	11	16	18	23	12	10	14	11	13	22	9	9	23	14	8	15	25	13
ID1160	LINE/L1	L1-2_BT	GTGGAGAAAAGGGAACCCTCCTACACTGTTGGTGGGAATGTA	55	57	48	50	58	47	61	45	45	43	48	46	49	36	82	71	30	51	42	28	46	37	53	74	36	63	41	28	57	64	49	56
ID1161	LINE/L1	L1-2_BT	GTGGCAGCCTGGATGGGAGGGGAGTTTGGGGGAGAATGGATA	194	133	138	133	142	132	155	134	128	135	117	143	117	0	214	113	122	118	126	65	90	86	156	199	132	130	108	88	138	150	136	162
ID1162	LINE/L1	L1-2_BT	GTGGTGACCTAAATGGGAAGGAAATCCAAAAAAGAGGGGATA	49	35	28	14	41	13	52	17	17	44	31	39	27	37	59	34	31	41	41	14	30	36	16	59	10	32	29	38	37	45	12	63
ID1163	LINE/L1	L1-2_BT	GTTAGGGAGTTTGGGATGGACATGTACACACTGCTATATTTA	0	44	48	46	46	66	47	0	40	48	43	57	56	38	78	44	33	45	62	22	37	37	51	83	51	44	39	49	43	60	47	52
ID1164	LINE/L1	L1-2_BT	GTTATCCATTTTAAATATAGCAGTGTGTACATGTCCATCCCA	66	47	52	58	41	59	63	56	38	62	46	70	60	47	84	46	40	63	67	21	52	49	45	98	61	47	38	44	50	86	47	64
ID1165	LINE/L1	L1-2_BT	GTTCATTTGTATCATTTCTTTTTAGATTCCACATATAAGGGA	70	44	46	57	39	43	58	58	45	57	54	53	51	36	90	49	36	60	57	22	42	39	61	89	43	40	35	38	48	61	55	53
ID1166	LINE/L1	L1-2_BT	GTTCTCCATGTTAAACACAGCAGTGTGTCCATGTCCATCCCA	0	15	19	152	19	26	15	52	0	25	28	27	23	24	20	18	20	57	35	12	24	22	14	41	11	21	25	18	6	23	8	17
ID1167	LINE/L1	L1-2_BT	GTTCTCCATGTTAAATACAGCAGTGTGTCCATGTCCATCCCA	48	17	19	10	33	13	38	29	1	19	24	19	14	0	61	22	28	33	9	25	18	14	16	100	93	24	13	18	38	40	4	15
ID1168	LINE/L1	L1-2_BT	GTTGTGATAGTTTCAGGTGAACAGCAAAGGGACTCAGCCATA	40	21	58	6	50	59	34	9	9	48	50	43	69	55	87	63	50	52	35	37	36	41	10	95	59	27	42	37	55	46	8	36
ID1169	LINE/L1	L1-2_BT	GTTGTGTTAGTTTCAGGTGTACAGCAAAGTGATTCAGTTATA	52	29	45	2	47	47	41	2	6	56	49	42	49	32	103	53	34	57	61	23	27	35	3	112	67	28	32	33	1	54	11	51
ID1170	LINE/L1	L1-2_BT	GTTGTGTTAGTTTCTGCTGTACAGCAAAGTGAATCAGTTATA	0	16	24	0	0	29	21	0	2	20	22	24	0	0	35	20	11	20	23	10	18	16	3	37	13	14	11	17	10	34	2	23
ID1171	LINE/L1	L1-2_BT	TAAAATAGATAAACAACAAGGACCTACTGTATAGCACAGGGA	9	11	11	12	2	11	4	12	11	5	7	2	20	11	13	9	10	9	11	5	7	7	17	21	16	13	13	10	11	10	9	4
ID1172	LINE/L1	L1-2_BT	TAAAATAGATAACCAACAAGGACCTACTGTATAGCACAGGGA	49	38	30	46	28	25	43	45	33	47	28	35	54	39	45	26	34	24	39	14	28	31	48	51	27	35	38	36	34	38	44	40
ID1173	LINE/L1	L1-2_BT	TAAAATGGATAACCAACAAGGACCTACTGTATAGCACAGGGA	0	46	41	0	0	0	74	0	47	46	0	61	0	50	76	39	0	57	45	15	43	41	60	112	43	44	45	31	59	85	63	74
ID1174	LINE/L1	L1-2_BT	TAAAATGGATAACCAACAAGGACCTACTGTATAGCACATGGA	45	31	21	30	21	38	40	32	27	38	24	29	50	33	61	18	35	20	41	7	27	34	41	66	33	29	27	34	44	42	41	47
ID1175	LINE/L1	L1-2_BT	TAACATGGAGAACCAGCAAGGACCTGCTGGACAGCACAGGGA	44	30	29	143	19	23	40	45	0	43	45	44	31	28	46	7	27	23	15	26	45	27	36	118	128	31	12	31	37	40	33	25
ID1176	LINE/L1	L1-2_BT	TAAGTTCATTTGTGTCATATTTTAGATTCCACATATAAGTGA	37	22	21	40	21	23	5	35	38	26	22	30	23	18	51	22	11	12	23	12	18	10	32	57	39	20	15	14	19	34	35	4
ID1177	LINE/L1	L1-2_BT	TAAGTTTGTTTTCTATGTCTGTGAGTCTGTTTCTGTTTTGTA	26	26	22	22	30	28	27	23	21	44	31	44	30	33	58	25	32	20	40	15	25	22	30	39	34	29	30	30	28	25	24	27
ID1178	LINE/L1	L1-2_BT	TAATAACCTTATGGTCACCAGGGGGAAGGATGGGGGAAGGGA	19	10	14	128	8	13	17	14	0	4	6	5	9	0	3	8	35	20	7	9	26	14	25	14	86	6	3	14	4	14	2	5
ID1179	LINE/L1	L1-2_BT	TAATAACCTTATGGTTCCCAGGGGGAAGGATGGGGGAAGGGA	10	7	11	23	11	12	2	9	0	11	31	10	24	11	36	10	16	10	9	9	13	19	2	72	30	7	7	8	3	3	0	2
ID1180	LINE/L1	L1-2_BT	TAATAGTATACCTTCCATGTTGCTGCAAATGTCAATATTCCA	0	0	0	0	0	1	0	0	0	15	1	0	0	2	0	0	50	1	18	0	0	5	0	1	0	0	0	322	0	1	0	0
ID1181	LINE/L1	L1-2_BT	TAATGCCATTTGCAGCAACATGGATGGACCTAGAGATTATCA	142	58	63	69	60	55	49	62	72	57	73	115	51	53	152	59	33	62	54	29	69	55	73	155	81	57	46	37	79	121	63	48
ID1182	LINE/L1	L1-2_BT	TACAATGTTGTGTTAGTTTCTGCTGTACAGCAAAGTGAATCA	98	52	70	0	61	71	85	1	2	75	40	73	80	49	139	63	40	60	78	33	54	43	3	100	56	31	36	38	49	91	1	93
ID1183	LINE/L1	L1-2_BT	TACACACTGCTATATTTAAAATGGATAACCAACAAGGACCTA	119	87	82	83	80	91	115	79	90	88	76	83	106	69	133	80	72	87	80	38	81	58	83	130	84	87	56	83	85	117	100	107
ID1184	LINE/L1	L1-2_BT	TACATGTATATGTATGGCTGAGTCCCTTCACTGTTCACCTGA	0	42	42	7	51	49	34	10	19	50	57	44	47	64	78	50	15	42	64	22	51	32	15	78	56	44	44	11	52	36	21	30
ID1185	LINE/L1	L1-2_BT	TACATGTATATGTATGGCTGAGTCCCTTTGCTGTTCACCTGA	55	33	44	3	47	50	37	5	9	38	44	26	59	38	65	54	34	39	16	33	27	34	4	80	55	32	37	32	52	49	6	41
ID1186	LINE/L1	L1-2_BT	TACTCAATATTCTGTAATAACCTATATGGGAAAAGAATCTGA	19	15	17	9	14	14	18	11	10	21	14	15	10	20	20	13	9	9	25	7	16	14	12	15	16	13	15	17	15	21	7	14
ID1187	LINE/L1	L1-2_BT	TACTCAGTGCTCTGTGGTGACCTAAATGGGAAGGAAATCCAA	97	43	42	21	44	19	89	25	17	41	49	44	65	55	83	38	44	63	29	18	33	50	19	97	20	41	43	47	46	85	5	89
ID1188	LINE/L1	L1-2_BT	TACTGTATAGCACAGGGAACTATAGTCAATATCTTGTAATAA	20	16	14	8	12	11	11	12	13	15	13	16	14	16	22	14	6	16	19	7	11	9	19	19	17	17	12	12	12	15	14	10
ID1189	LINE/L1	L1-2_BT	TACTGTATAGCACAGGGAACTATATTCAATATCCTGTGATAA	26	45	36	56	28	22	23	46	37	56	38	54	49	35	65	33	38	36	57	15	40	35	55	68	42	46	42	37	45	27	46	21
ID1190	LINE/L1	L1-2_BT	TACTGTATAGCACAGGGAACTCTACTCAATATTCTGTAATAA	23	14	13	20	8	4	13	20	11	8	11	20	21	12	19	7	13	8	9	3	5	9	14	28	15	13	10	11	11	19	8	18
ID1191	LINE/L1	L1-2_BT	TAGAATGGATAAACAACAAGGTCCTACTGTATAGCACAGGGA	17	12	14	29	15	16	10	22	21	18	10	16	24	21	32	14	15	11	24	7	11	12	35	38	7	11	13	14	18	14	21	10
ID1192	LINE/L1	L1-2_BT	TAGCACAGGGAACTATATTCAATATCCTGTGATAAACCATAA	34	49	45	50	44	37	28	47	47	68	58	62	47	32	77	44	34	46	61	21	42	33	69	70	41	44	39	31	39	34	55	27
ID1193	LINE/L1	L1-2_BT	TAGCAGATGCAAACTATTATATATAGAATGGATAAACAACAA	10	4	6	11	7	10	22	14	13	10	10	14	10	3	17	6	2	8	7	3	8	5	14	20	12	5	9	0	15	10	10	10
ID1194	LINE/L1	L1-2_BT	TAGCCAATTAACAATGTTGTGATAGTTTCAGGTGAACAGCAA	9	14	22	3	15	19	13	2	4	17	24	12	24	0	22	20	23	17	11	14	10	12	2	25	13	10	3	14	16	10	3	10
ID1195	LINE/L1	L1-2_BT	TAGGGAGTTTGGGATGGACATGTACACACTGCTATATTTAAA	74	58	62	55	59	76	67	62	49	57	52	65	72	48	89	54	38	59	64	25	50	49	59	96	67	58	54	53	60	73	62	68
ID1196	LINE/L1	L1-2_BT	TAGTTGATTTACAATGTTGTGTTAGTTTCAGGTATACAGCAA	32	31	29	10	29	43	32	8	16	30	32	30	45	27	52	27	24	38	30	18	32	30	9	56	28	28	11	18	1	35	18	30
ID1197	LINE/L1	L1-2_BT	TAGTTGATTTACAATGTTGTGTTAGTTTCAGGTGTACAGCAA	83	45	63	11	71	66	63	11	8	67	53	46	75	54	136	65	58	68	71	24	41	51	7	148	74	31	27	54	0	76	15	57
ID1198	LINE/L1	L1-2_BT	TAGTTGATTTACAATGTTGTGTTAGTTTCAGGTGTATAGCAA	8	13	29	30	23	30	20	32	28	29	20	16	34	20	28	20	19	15	22	10	24	14	34	26	24	14	14	16	4	18	22	19
ID1199	LINE/L1	L1-2_BT	TAGTTGCTTTACAATGTTGTGTTAGTTTCTGCTGTACAGCAA	49	30	51	0	50	59	58	3	2	51	27	51	65	39	95	44	34	40	41	23	37	32	3	58	21	13	23	33	33	38	2	62
ID1200	LINE/L1	L1-2_BT	TATACAGTAGGACCTTGTTGTTTATCCATTCTATATATAATA	12	5	11	11	7	15	8	8	5	9	8	8	12	4	17	10	5	5	14	3	9	7	20	19	6	6	11	3	8	5	11	9
ID1201	LINE/L1	L1-2_BT	TATACAGTAGGTCCTTGTTGGTTATCCATTTTAAATATAGCA	84	67	52	71	64	61	78	71	73	65	50	66	90	63	91	64	58	72	58	31	63	53	73	119	62	64	51	61	74	79	91	82
ID1202	LINE/L1	L1-2_BT	TATAGCACAGGGAACTCTACTCAGTGCTCTGTGGTGACCTAA	0	16	19	4	10	13	40	7	4	13	14	21	30	0	50	10	26	15	19	6	13	24	11	46	20	16	22	18	19	41	2	42
ID1203	LINE/L1	L1-2_BT	TATAGCACAGGGAACTCTGCTCAATATTATGTAACAACCTAA	13	10	9	8	13	8	12	11	9	4	9	4	8	8	12	13	14	14	9	4	6	9	16	13	3	12	7	8	9	13	12	9
ID1204	LINE/L1	L1-2_BT	TATATAAAATAGATAAACAACAAGGACCTACTGTATAGCACA	16	13	15	12	6	7	3	15	8	20	8	3	12	9	22	13	9	10	13	9	3	6	15	25	12	11	17	14	17	13	13	5
ID1205	LINE/L1	L1-2_BT	TATATAGAATGGATAAACAACAAGGTCCTACTGTATAGCACA	0	6	11	15	9	21	8	13	15	20	14	11	22	13	22	10	12	6	20	6	8	15	17	24	8	6	13	13	12	8	16	9
ID1206	LINE/L1	L1-2_BT	TATATATAAAATAGATAAACAACAAGGACCTACTGTATAGCA	13	7	11	6	4	5	2	9	7	14	8	2	9	7	19	8	6	9	12	7	3	4	11	22	9	6	13	10	14	12	7	3
ID1207	LINE/L1	L1-2_BT	TATATATAGAATGGATAAACAACAAGGTCCTACTGTATAGCA	14	6	13	15	12	22	10	10	13	19	15	13	25	12	23	12	9	7	23	5	10	11	21	23	6	7	14	10	11	9	18	12
ID1208	LINE/L1	L1-2_BT	TATATGTATAACTGAATCACTTTGCTGTACACCTGAAACTAA	53	41	47	8	43	43	42	6	7	47	54	28	69	40	106	50	37	55	45	25	31	32	6	116	51	35	30	30	25	56	7	49
ID1209	LINE/L1	L1-2_BT	TATATTTAAAATGGATAACCAACAAGGACCTACTGTATAGCA	89	66	49	65	63	66	86	67	65	66	45	63	89	69	100	56	61	66	59	24	64	50	69	131	56	66	51	58	66	84	89	88
ID1210	LINE/L1	L1-2_BT	TATCCATTTTAAATATAGCAGTGTGTACATGTCCATCCCAAA	71	49	49	59	44	65	64	52	45	69	51	71	71	47	83	50	42	65	63	19	50	47	56	97	70	52	45	48	52	82	50	65
ID1211	LINE/L1	L1-2_BT	TATCTATTTTATATATAGTAGTGTGTATATGTTAATCCCAAA	18	13	15	12	15	20	15	13	16	14	13	12	15	10	26	12	8	9	16	7	14	5	15	26	9	11	5	10	11	17	17	19
ID1212	LINE/L1	L1-2_BT	TATGACATCCCTTATATGTGGAATCTAAAAAGAAATGATACA	58	34	33	57	39	43	58	67	46	50	53	51	44	35	86	33	32	47	53	16	36	31	54	77	26	38	41	38	40	58	52	52
ID1213	LINE/L1	L1-2_BT	TATGTATAACTGAATCACTTTGCTGTACACCTGAAACTAACA	54	41	51	8	43	36	43	8	16	52	58	37	65	37	120	50	34	59	53	25	36	37	7	138	65	35	30	33	12	59	6	54
ID1214	LINE/L1	L1-2_BT	TATGTATGGCTGAGTCCCTTTGCTGTTCACCTGAAACTATCA	43	23	54	4	56	60	40	5	15	53	48	37	76	49	77	56	44	51	28	37	29	40	7	93	53	30	49	38	54	48	6	43
ID1215	LINE/L1	L1-2_BT	TATTCAATATCCTGTGATAAACCATAATGGAAAAGAATATGA	0	49	47	61	58	48	45	50	49	61	62	59	59	38	89	53	37	41	72	28	43	49	73	84	48	48	49	38	54	49	63	42
ID1216	LINE/L1	L1-2_BT	TATTCTGTAATAACCTATATGGGAAAAGAATCTGAAAAAGAA	21	16	12	15	17	19	21	17	13	30	17	15	11	20	18	17	15	19	24	5	9	21	12	25	16	15	12	20	13	23	14	19
ID1217	LINE/L1	L1-2_BT	TATTTAAAATGGATAACCAACAAGGACCTACTGTATAGCACA	124	77	70	82	84	79	114	89	75	89	57	77	98	94	132	74	80	78	88	34	81	69	91	187	67	72	70	69	83	126	104	115
ID1218	LINE/L1	L1-2_BT	TATTTAACATGGAGAACCAGCAAGGACCTGCTGGACAGCACA	29	13	14	19	10	12	27	13	0	23	18	21	12	24	29	11	6	13	5	17	21	11	16	91	108	18	9	18	27	28	7	14
ID1219	LINE/L1	L1-2_BT	TATTTACAAAACAGAAACAGACTCACAGACATAGAAAACAAA	34	31	31	35	32	40	30	40	43	47	43	54	42	33	84	26	29	36	46	18	34	21	45	53	40	39	38	28	42	40	52	31
ID1220	LINE/L1	L1-2_BT	TCAATATCCTGTGATAAACCATAATGGAAAAGAATATGAAAA	51	62	63	67	72	60	57	68	57	66	68	60	81	56	98	65	51	55	81	33	57	63	90	92	57	60	52	53	71	59	73	56
ID1221	LINE/L1	L1-2_BT	TCAATATTCTGTAATAACCTATATGGGAAAAGAATCTGAAAA	22	15	15	9	16	16	18	13	13	23	17	17	12	21	19	13	9	14	25	7	13	15	14	20	23	13	15	17	13	26	12	15
ID1222	LINE/L1	L1-2_BT	TCACAGGATATTGAATATAGTTCCCTGTGCTATACAGTAGGA	23	40	36	34	25	21	14	28	29	46	40	48	50	28	64	31	30	37	47	10	35	24	41	58	40	40	31	30	36	26	44	15
ID1223	LINE/L1	L1-2_BT	TCAGGGAGTCTGGGATGGACATGGACACACTGCTGTATTTAA	20	9	9	10	12	7	16	30	1	15	14	18	16	9	21	8	25	20	15	7	14	14	12	62	99	9	14	15	30	16	4	7
ID1224	LINE/L1	L1-2_BT	TCAGGGAGTCTGGGATGGACATGGACACACTGCTGTGTTTAA	13	6	8	149	17	21	9	64	0	27	23	28	17	0	10	10	20	36	30	7	19	25	9	22	10	13	22	17	3	10	8	11
ID1225	LINE/L1	L1-2_BT	TCAGTGCTCTGTGGTGACCTAAATGGGAAGGAAATCCAAAAA	106	55	46	31	58	20	93	27	21	60	42	55	65	60	99	50	55	61	49	23	46	56	25	104	23	52	60	58	54	93	11	91
ID1226	LINE/L1	L1-2_BT	TCCCCCTGGTGACCATAAGGTTATTACAGAGTACTGAGCAGA	0	0	1	0	0	0	0	0	0	0	1	0	0	0	0	0	0	6	0	0	1	0	0	0	84	5	1	0	0	1	0	0
ID1227	LINE/L1	L1-2_BT	TCCCCCTGGTGACCATAAGGTTATTACAGAGTATTGAGCAGA	17	5	8	137	3	14	12	19	0	3	10	1	11	3	3	6	9	24	4	4	20	4	34	21	13	9	0	11	12	13	3	5
ID1228	LINE/L1	L1-2_BT	TCTCCAAAGAAGACATACAGATGGCCAAGAGGCACATGAAAA	0	27	28	55	30	33	37	0	34	27	31	34	36	0	37	35	25	30	25	20	25	18	40	52	22	27	27	25	34	38	38	35
ID1229	LINE/L1	L1-2_BT	TCTCCATGTTAAACACAGCAGTGTGTCCATGTCCATCCCAGA	0	8	13	0	0	25	8	0	0	26	21	23	0	0	12	11	16	41	29	9	23	17	12	30	9	15	26	16	5	14	6	9
ID1230	LINE/L1	L1-2_BT	TCTCCATGTTAAATACAGCAGTGTGTCCATGTCCATCCCAGA	0	9	10	8	14	11	19	31	1	15	18	18	11	17	27	8	21	23	7	7	15	15	10	71	93	11	15	16	19	28	4	7
ID1231	LINE/L1	L1-2_BT	TCTGTAATAACCTTATGGTCACCAGGGGGAAGGATGGGGGAA	16	12	11	130	7	13	18	12	0	5	6	5	9	17	4	9	32	23	8	9	24	14	24	14	92	8	4	12	3	15	3	7
ID1232	LINE/L1	L1-2_BT	TCTGTAATAACCTTATGGTTCCCAGGGGGAAGGATGGGGGAA	10	8	9	27	8	12	3	10	0	13	31	11	27	13	35	9	18	11	12	10	13	18	2	75	35	10	8	9	5	4	0	1
ID1233	LINE/L1	L1-2_BT	TGAAACTAACACAACATTGTAAATCAACTATACTCCAATAAA	0	27	44	0	0	43	30	0	28	51	27	36	0	40	54	42	35	41	48	22	31	24	43	63	35	29	20	32	17	36	36	34
ID1234	LINE/L1	L1-2_BT	TGAACTTATTTACAAAACAGAAACAGACTCACAGACATAGAA	35	23	36	42	30	41	25	43	44	35	38	49	39	39	62	28	32	29	39	12	23	29	48	49	31	34	33	31	39	36	51	27
ID1235	LINE/L1	L1-2_BT	TGAACTTATTTACAAAACAGAAATAGACTCACAGACATAGAA	42	20	34	31	28	43	29	42	31	37	37	39	37	24	50	21	18	29	38	13	28	24	38	57	32	25	29	24	27	43	37	31
ID1236	LINE/L1	L1-2_BT	TGACATCCCTTATATGTGGAATCTAAAAAGAAATGATACAAA	65	37	44	56	42	44	62	65	42	49	50	55	47	34	86	42	36	46	53	21	44	31	52	87	38	39	42	38	47	62	54	58
ID1237	LINE/L1	L1-2_BT	TGATACAAATGAACTTATTTACAAAACAGAAACAGACTCACA	64	46	57	80	64	52	51	70	57	55	74	71	80	69	108	62	60	46	73	37	58	53	91	112	64	59	45	53	69	57	79	49
ID1238	LINE/L1	L1-2_BT	TGATGGACATTTAGGTTGCTTCCATGTCTTGGCTATTGTAAA	56	36	43	53	47	31	51	55	45	45	62	42	41	34	52	35	30	42	48	23	41	31	53	57	46	43	39	26	39	51	52	55
ID1239	LINE/L1	L1-2_BT	TGCTGGACAGCACAGGGAACTCTGCTCAATACTCTGTAATAA	0	25	15	144	0	9	14	0	0	6	30	6	14	6	50	2	12	14	10	7	25	10	27	122	26	26	5	9	17	21	8	7
ID1240	LINE/L1	L1-2_BT	TGCTGGTTCTCCATGTTAAACACAGCAGTGTGTCCATGTCCA	0	13	18	148	14	28	14	53	0	28	31	24	22	23	15	16	18	59	35	11	16	22	13	33	8	20	26	21	8	19	7	14
ID1241	LINE/L1	L1-2_BT	TGCTGGTTCTCCATGTTAAATACAGCAGTGTGTCCATGTCCA	36	10	15	12	26	11	29	27	1	17	19	21	11	19	37	21	19	26	7	24	20	15	14	85	85	16	11	19	34	31	5	9
ID1242	LINE/L1	L1-2_BT	TGCTGTATTTAACATGGAGAACCAGCAAGGACCTGCTGGACA	0	9	8	0	0	13	23	0	0	15	16	19	0	22	33	10	7	15	5	15	12	9	11	89	88	13	7	15	24	25	10	12
ID1243	LINE/L1	L1-2_BT	TGCTGTCCAGCAGGTCCTTGCTGGTTCTCCATGTTAAACACA	0	8	9	171	7	14	18	59	0	24	20	18	11	15	11	14	18	26	12	10	13	11	13	22	10	8	21	17	8	15	25	13
ID1244	LINE/L1	L1-2_BT	TGCTGTCCAGCAGGTCCTTGCTGGTTCTCCATGTTAAATACA	29	11	11	21	9	14	24	15	0	22	17	19	11	26	30	12	7	13	5	17	18	9	18	89	108	18	6	17	25	28	8	13
ID1245	LINE/L1	L1-2_BT	TGCTGTGTTTAACATGGAGAACCAGCAAGGACCTGCTGGACA	22	7	9	144	7	7	17	46	0	29	20	16	12	14	10	14	12	26	11	7	13	10	10	22	8	8	21	17	5	15	18	9
ID1246	LINE/L1	L1-2_BT	TGGACATGTACACACTGCTATATTTAAAATGGATAACCAACA	70	53	56	47	50	68	67	55	39	52	58	69	70	44	85	49	39	56	59	19	51	39	50	87	62	48	39	48	50	81	44	73
ID1247	LINE/L1	L1-2_BT	TGGAGAAAAGGGAACCCTCCTACACTGTTGGTGGGAATGTAA	58	60	51	58	59	53	67	56	50	48	56	46	55	41	90	69	32	53	46	29	50	38	63	72	43	60	42	29	54	67	54	62
ID1248	LINE/L1	L1-2_BT	TGGGATTAGCAGATGCAAACTATTATATATAGAATGGATAAA	0	5	8	0	0	0	11	0	8	7	0	15	0	4	16	8	5	3	9	6	5	9	15	22	10	5	6	5	12	17	14	10
ID1249	LINE/L1	L1-2_BT	TGGGGGAAGGGATAGTCAGGGAGTCTGGGATGGACATGGACA	20	14	32	308	32	28	18	112	6	28	19	23	32	33	27	19	47	49	23	18	34	24	63	57	169	18	17	34	14	19	30	12
ID1250	LINE/L1	L1-2_BT	TGTATAACTGAATCACTTTGCTGTACACCTGAAACTAACACA	65	40	52	8	52	38	50	7	10	61	55	35	66	44	134	58	40	58	62	29	39	47	5	138	81	38	42	35	7	67	12	58
ID1251	LINE/L1	L1-2_BT	TGTATGGCTGAGTCCCTTTGCTGTTCACCTGAAACTATCACA	0	23	65	0	0	64	45	0	14	62	54	40	0	61	84	71	49	54	34	41	37	47	9	97	59	31	50	48	60	54	10	46
ID1252	LINE/L1	L1-2_BT	TGTGCTGTCCAGCAGGTCCTTGCTGGTTCTCCATGTTAAACA	22	8	9	125	7	14	20	35	0	24	19	21	12	13	10	15	18	21	12	10	15	13	10	23	10	9	20	14	8	14	23	13
ID1253	LINE/L1	L1-2_BT	TGTTATGTGGCAGCCTGGATGGGAGGGGAGTTTGGGGGAGAA	0	109	104	115	115	123	133	122	128	123	118	118	121	92	192	100	96	107	124	48	69	73	136	175	111	104	85	74	122	125	120	130
ID1254	LINE/L1	L1-2_BT	TGTTGTTTATCCATTCTATATATAATAGTTTGCATCTGCTAA	0	4	5	11	7	10	22	13	10	12	10	16	9	3	19	6	4	9	8	3	6	5	12	22	10	5	9	2	14	11	8	10
ID1255	LINE/L1	L1-2_BT	TTAAATATAGCAGTGTGTACATGTCCATCCCAAACTCCCTAA	0	50	55	48	52	70	54	55	43	55	47	61	62	42	85	46	33	52	67	23	44	41	56	90	61	50	44	51	50	65	54	58
ID1256	LINE/L1	L1-2_BT	TTATCCATTTTAAATATAGCAGTGTGTACATGTCCATCCCAA	0	48	51	62	43	65	62	0	43	67	51	68	66	50	88	49	42	66	65	18	52	50	49	99	70	49	44	53	49	82	48	62
ID1257	LINE/L1	L1-2_BT	TTATCTATTTTATATATAGTAGTGTGTATATGTTAATCCCAA	22	13	19	15	17	23	20	17	18	18	17	18	20	12	33	15	8	11	17	8	15	10	18	28	12	11	7	10	17	21	20	22
ID1258	LINE/L1	L1-2_BT	TTATTTACAAAACAGAAACAGACTCACAGACATAGAAAACAA	36	34	35	34	33	44	32	38	42	45	44	50	49	35	88	32	32	35	44	21	31	20	45	55	40	41	38	29	46	39	51	34
ID1259	LINE/L1	L1-2_BT	TTCAATATCCTGTGATAAACCATAATGGAAAAGAATATGAAA	0	50	49	65	65	49	52	59	58	58	65	59	64	42	88	55	40	46	69	28	47	54	82	83	50	52	52	41	61	54	66	46
ID1260	LINE/L1	L1-3_BT	AAAAAACTAGGAATAAAACCACCATATGACCCAGCAATCCCA	253	195	209	243	215	219	249	290	232	188	230	189	210	183	307	223	140	213	202	110	172	113	302	338	188	199	158	150	136	274	203	235
ID1261	LINE/L1	L1-3_BT	AAAAACCTTGAAAACAAAATGGAGAAAATGCAAGAATCAATT	205	128	145	118	149	150	169	142	119	120	147	142	138	121	167	150	91	142	134	84	114	77	135	165	117	154	95	102	115	163	97	151
ID1262	LINE/L1	L1-3_BT	AAAAACTAGGAATAAAACCACCATATGACCCAGCAATCCCAC	313	239	256	291	242	262	294	347	262	232	263	219	249	220	334	268	192	244	254	134	219	144	348	369	213	248	199	202	172	329	243	270
ID1263	LINE/L1	L1-3_BT	AAAAAGAATTCAGAATAATGATAGTAAAGATGATCAAAAACC	196	120	121	124	147	147	158	138	109	134	159	125	137	110	171	149	91	119	146	60	114	78	132	185	116	134	103	110	118	179	99	163
ID1264	LINE/L1	L1-3_BT	AAAAATACTCTAGAAGGAATCAATAGCAGAATATCTGAAGCA	217	125	149	135	159	120	186	168	142	161	151	155	172	0	185	160	103	152	168	78	137	96	191	206	110	135	125	142	144	191	115	197
ID1265	LINE/L1	L1-3_BT	AAAACAAAATGGAGAAAATGCAAGAATCAATTAACAAAGACC	180	136	138	122	144	136	153	142	113	121	130	121	137	112	153	145	79	120	129	77	113	88	144	172	113	146	96	103	117	137	94	133
ID1266	LINE/L1	L1-3_BT	AAAACAACAAAATTCTGTAAAGCAATTATCCTTCAATAAAAA	351	231	234	254	242	276	344	289	217	236	279	253	295	207	439	242	205	281	282	117	223	148	302	388	243	241	186	187	256	359	255	342
ID1267	LINE/L1	L1-3_BT	AAAACAACAAAATTCTGTAAAGCAATTATCCTTCAATTAAAA	432	323	314	342	344	351	431	348	283	340	350	332	343	276	448	333	282	339	337	156	289	226	366	428	296	335	267	276	298	410	338	407
ID1268	LINE/L1	L1-3_BT	AAAACAGCAAAATTCTGTAAAGCAATTATCCTTCAATAAAAA	0	185	197	235	228	222	258	266	201	206	225	222	254	185	304	210	172	207	211	97	183	145	267	336	195	198	174	157	203	266	228	269
ID1269	LINE/L1	L1-3_BT	AAAACCACAATTGAAACCCAGGGGCAGTGTGGCTAAGGAAGA	95	60	80	63	70	68	82	70	53	62	63	70	73	56	110	66	50	78	65	24	47	44	64	84	52	63	49	51	56	93	44	81
ID1270	LINE/L1	L1-3_BT	AAAACCACCATATGACCCAGCAATCCCACTCCTAGGCATATA	296	248	229	288	248	273	293	339	243	251	282	237	234	233	314	263	191	231	267	119	238	149	338	344	235	268	169	193	168	289	262	275
ID1271	LINE/L1	L1-3_BT	AAAACCACTACAATATTGTAAAGTAATTAGCCTCCAATTAAA	975	635	722	698	715	766	896	779	611	720	749	740	737	582	1184	686	512	666	770	334	606	416	904	1246	687	666	505	529	632	930	700	903
ID1272	LINE/L1	L1-3_BT	AAAACCTTGAAAACAAAATGGAGAAAATGCAAGAATCAATTA	213	130	145	128	150	143	178	151	117	126	152	140	136	117	171	149	89	142	138	84	110	75	141	169	117	158	99	101	117	167	99	155
ID1273	LINE/L1	L1-3_BT	AAAACTAGGAATAAAACCACCATATGACCCAGCAATCCCACT	315	247	261	295	249	268	301	346	270	238	275	228	257	225	333	290	205	248	265	137	227	156	351	369	222	256	195	209	183	335	238	276
ID1274	LINE/L1	L1-3_BT	AAAACTGGACAGCTACATGTAAAAGAATGAAATTAGAACACT	363	245	290	248	316	291	328	274	257	288	290	236	267	235	299	277	222	290	295	138	244	157	316	378	247	252	207	224	195	359	201	281
ID1275	LINE/L1	L1-3_BT	AAAAGAATGAAATTAGAACACTTCCTAACACCATACACAAAG	338	239	266	300	268	269	346	349	267	252	284	235	279	212	318	252	206	257	266	135	255	145	364	409	239	273	179	214	166	328	238	264
ID1276	LINE/L1	L1-3_BT	AAAAGAATTCAGAATAATGATAGTAAAGATGATCAAAAACCT	0	132	133	0	0	0	166	0	117	143	0	135	0	119	175	156	96	123	154	64	128	81	142	192	120	147	109	122	123	183	103	174
ID1277	LINE/L1	L1-3_BT	AAAAGACAACCCTCAGAATGGGAGAAAATAATAGCAAATGAA	0	253	293	316	280	282	361	349	255	266	304	328	281	234	340	282	237	263	290	157	235	162	387	408	234	297	195	217	187	374	254	306
ID1278	LINE/L1	L1-3_BT	AAAAGCTTTTCAGACAAGCAAAAGTTAAGAGAATTCAGTACC	208	131	143	132	149	171	195	159	148	139	177	133	156	133	173	169	121	156	160	76	137	95	187	223	130	157	129	130	101	188	106	197
ID1279	LINE/L1	L1-3_BT	AAAAGGGAGGGGATATATGTATACCTATGGCTGATTCATGTT	346	203	214	184	264	268	309	209	177	234	249	220	270	208	429	259	183	238	237	137	221	130	213	452	263	225	155	175	237	312	211	316
ID1280	LINE/L1	L1-3_BT	AAAATAATAGCAAATGAAACAACTGACAAAGGATTAATTTCC	449	314	364	382	343	348	426	424	362	355	370	379	359	310	404	355	300	347	397	182	290	249	433	532	322	355	253	288	238	436	281	353
ID1281	LINE/L1	L1-3_BT	AAAATACTCTAGAAGGAATCAATAGCAGAATATCTGAAGCAG	0	129	156	0	0	120	184	0	137	161	149	164	0	111	181	159	92	145	165	74	136	86	192	207	117	139	118	139	145	189	109	191
ID1282	LINE/L1	L1-3_BT	AAAATAGATAGCCAATGGGAATTTGCTGTATGGCTCAGGAAA	200	141	177	99	185	191	199	111	112	145	192	123	170	138	192	190	146	151	160	99	113	76	83	268	154	164	140	151	154	206	124	189
ID1283	LINE/L1	L1-3_BT	AAAATGCAAGAATCAATTAACAAAGACCTAGAAGAATTAAAG	198	145	159	144	164	157	188	180	147	147	159	156	148	116	193	179	92	137	160	94	140	111	190	202	146	155	112	119	130	175	122	178
ID1284	LINE/L1	L1-3_BT	AAAATGGAGAAAATGCAAGAATCAATTAACAAAGACCTAGAA	190	141	154	143	148	140	169	157	130	143	150	141	144	0	165	159	90	139	153	80	127	95	164	184	128	146	102	108	114	150	100	153
ID1285	LINE/L1	L1-3_BT	AAAATGGTGGAAATAACTTCTGAAGAGCAGAATAAAGTAAAA	237	143	177	170	183	196	201	204	187	187	185	188	205	0	205	175	113	179	196	89	161	98	227	232	144	146	120	146	143	224	140	198
ID1286	LINE/L1	L1-3_BT	AAAATTAATAAGGAAACACAAGTCTTAAATGATACATTAGAT	0	134	165	0	0	163	181	0	133	158	163	170	0	155	225	185	97	160	158	90	146	90	213	214	156	165	119	115	110	197	110	185
ID1287	LINE/L1	L1-3_BT	AAACAAAATGGAGAAAATGCAAGAATCAATTAACAAAGACCT	0	134	140	0	0	0	149	0	117	120	126	118	0	111	153	147	79	118	130	78	113	84	148	171	111	142	89	101	114	135	91	132
ID1288	LINE/L1	L1-3_BT	AAACAACAAAATTCTGTAAAGCAATTATCCTTCAATAAAAAA	332	213	211	236	229	256	306	267	195	215	259	227	268	186	415	227	188	257	261	108	205	140	278	371	218	223	175	167	221	333	235	314
ID1289	LINE/L1	L1-3_BT	AAACAACAAAATTCTGTAAAGCAATTATCCTTCAATTAAAAA	426	314	314	337	339	340	412	336	285	333	347	331	346	268	449	326	281	334	332	147	289	241	360	421	298	327	250	277	304	407	321	400
ID1290	LINE/L1	L1-3_BT	AAACACAAGTCTTAAATGATACATTAGATGAGATGGATCTCA	191	154	160	149	167	161	166	159	127	150	149	141	151	132	184	178	110	138	156	84	125	88	190	196	126	183	102	118	112	162	98	151
ID1291	LINE/L1	L1-3_BT	AAACACAGAAGTCCAAATAAATGAAGAGGAAATAGGCAAACT	190	131	147	149	161	145	177	158	132	130	150	125	139	107	174	148	74	141	141	79	124	86	109	159	111	137	113	88	126	174	106	155
ID1292	LINE/L1	L1-3_BT	AAACAGACATAGAGAATAGACTTATGGACATGGGGAGAGGGG	228	171	192	259	171	210	237	273	205	197	195	113	205	128	243	171	145	175	212	87	153	86	281	296	144	183	141	138	158	249	216	224
ID1293	LINE/L1	L1-3_BT	AAACAGATGGAGAGATATTCCATGTTCCTGGGTAGGAAGAAT	253	162	190	193	206	193	248	217	208	184	196	194	202	164	237	208	125	172	189	103	153	112	228	282	140	201	117	151	133	252	149	217
ID1294	LINE/L1	L1-3_BT	AAACAGCTGATCTGTGGCAGCCTAAATGGAATGAGAATCAGA	0	117	131	0	0	0	137	0	111	118	0	117	0	0	162	144	103	134	116	60	104	90	158	146	96	120	94	95	124	147	121	136
ID1295	LINE/L1	L1-3_BT	AAACAGGGGCTCTGTATCAACCTAGAGGGGTGGGATGGGGAG	276	187	229	147	217	220	235	164	199	189	206	272	220	0	356	222	159	211	227	120	187	100	218	386	192	212	185	154	207	292	209	270
ID1296	LINE/L1	L1-3_BT	AAACATTTAAGGCTGAGAGTGAAACAGCTGATCTGTGGCAGC	135	94	97	104	98	84	129	122	93	107	82	119	86	83	134	50	85	104	100	41	95	72	133	124	59	93	80	81	96	119	108	127
ID1297	LINE/L1	L1-3_BT	AAACCAACACAACATTGTAAAGCAATTATCCTCCAATTAAAA	187	117	122	94	153	163	185	102	102	135	157	123	147	0	194	138	107	112	153	59	116	86	144	201	69	73	97	101	124	197	80	182
ID1298	LINE/L1	L1-3_BT	AAACCACAATTGAAACCCAGGGGCAGTGTGGCTAAGGAAGAA	88	59	76	60	64	64	73	65	48	55	59	71	69	53	105	64	51	69	65	21	46	43	64	79	47	64	44	49	55	87	41	72
ID1299	LINE/L1	L1-3_BT	AAACCACCATATGACCCAGCAATCCCACTCCTAGGCATATAC	283	244	228	274	252	265	278	319	227	244	267	222	236	219	296	260	190	226	261	116	218	141	313	331	216	264	163	187	164	273	246	256
ID1300	LINE/L1	L1-3_BT	AAACCACTACAATATTGTAAAGTAATTAGCCTCCAATTAAAA	925	601	666	670	663	718	832	742	581	672	709	698	694	535	1123	646	461	641	728	309	571	374	873	1188	650	631	476	480	595	894	667	847
ID1301	LINE/L1	L1-3_BT	AAACCTCAACATGAATCAGCCATAGGTATACATATATCCCCT	405	261	288	256	305	296	381	268	229	290	330	278	321	242	503	311	220	287	298	167	242	181	261	514	326	305	199	219	304	367	263	368
ID1302	LINE/L1	L1-3_BT	AAACCTTGAAAACAAAATGGAGAAAATGCAAGAATCAATTAA	215	129	140	130	147	140	180	155	118	130	153	142	137	0	163	151	87	146	137	84	108	76	143	168	117	154	102	100	119	163	100	161
ID1303	LINE/L1	L1-3_BT	AAACTAGAAACACAGAAGTCCAAATAAATGAAGAGGAAATAG	0	131	150	0	0	0	194	0	144	136	0	136	0	111	190	157	0	164	132	77	123	81	111	162	110	134	121	103	128	185	111	175
ID1304	LINE/L1	L1-3_BT	AAACTCAAACAGGGGCTCTGTATCAACCTAGAGGGGTGGGAT	350	219	278	174	253	287	287	186	224	241	246	304	274	219	408	256	192	242	269	138	237	147	248	416	231	250	224	189	253	357	236	303
ID1305	LINE/L1	L1-3_BT	AAACTGGACAGCTACATGTAAAAGAATGAAATTAGAACACTT	348	244	293	253	315	299	328	281	258	283	291	243	270	239	288	279	222	282	294	133	239	162	309	372	249	252	210	222	189	356	193	279
ID1306	LINE/L1	L1-3_BT	AAACTTACATTACCATATGTAAAATAGATAGCCAATGGGAAT	266	141	163	109	188	176	220	119	120	155	189	121	193	137	235	163	111	183	169	83	114	70	127	261	167	167	131	135	162	248	98	232
ID1307	LINE/L1	L1-3_BT	AAAGAAGACATACAGATGGCTAACAAACACATGAAAAGATGC	7242	1605	1739	7398	1315	2116	8511	9487	2822	2848	1798	1871	1447	2367	3790	3593	1616	5251	2044	1469	1833	1258	8460	5186	885	3026	939	2485	924	8541	1310	5546
ID1308	LINE/L1	L1-3_BT	AAAGAATGAAATTAGAACACTTCCTAACACCATACACAAAGA	350	260	277	318	279	285	357	351	268	260	288	243	293	220	331	268	211	267	282	141	265	159	376	411	250	292	190	218	176	345	247	270
ID1309	LINE/L1	L1-3_BT	AAAGAATTCAGAATAATGATAGTAAAGATGATCAAAAACCTT	204	125	132	124	148	163	167	152	118	138	157	138	145	118	180	151	93	125	149	64	127	78	146	192	120	141	104	118	119	183	105	175
ID1310	LINE/L1	L1-3_BT	AAAGACAACCCTCAGAATGGGAGAAAATAATAGCAAATGAAA	347	256	292	311	278	280	352	340	243	266	300	323	286	234	332	278	232	262	277	157	229	161	391	411	230	298	198	214	189	367	253	300
ID1311	LINE/L1	L1-3_BT	AAAGACACATATAGACTGAAAGTGAGAGGATGGAAAAATATA	111	68	83	84	87	94	104	91	81	109	94	97	83	0	101	95	67	101	108	34	70	43	108	114	70	88	79	169	62	112	65	91
ID1312	LINE/L1	L1-3_BT	AAAGAGTAACATGGAAACTTACATTACCATATGTAAAATAGA	382	249	242	218	245	279	380	242	199	266	284	191	279	0	420	259	197	263	299	145	242	90	284	431	245	263	219	200	243	400	180	361
ID1313	LINE/L1	L1-3_BT	AAAGATGATCAAAAACCTTGAAAACAAAATGGAGAAAATGCA	0	118	147	108	124	136	165	137	107	116	126	137	129	104	170	137	84	135	124	76	117	70	143	170	113	137	95	92	111	166	90	146
ID1314	LINE/L1	L1-3_BT	AAAGCTTTTCAGACAAGCAAAAGTTAAGAGAATTCAGTACCA	208	131	142	134	148	171	188	160	148	144	180	134	162	133	170	167	122	157	163	73	139	92	189	223	136	158	130	128	105	190	101	190
ID1315	LINE/L1	L1-3_BT	AAAGCTTTTGCACAGCAAAGGAAACTATAAGCAAGGTGAAAA	307	252	266	288	272	277	312	273	2026	236	279	307	280	229	263	285	208	245	267	159	220	134	321	399	219	283	171	214	162	289	210	289
ID1316	LINE/L1	L1-3_BT	AAAGGGAGGGGATATATGTATACCTATGGCTGATTCATGTTG	0	221	233	190	276	280	317	218	181	236	265	236	283	214	445	272	194	239	245	148	224	133	215	447	270	242	172	177	260	320	211	327
ID1317	LINE/L1	L1-3_BT	AAAGTCTACAAACAATAAATGCTGGAGAGGGTGTGGAGAAAA	915	552	552	890	525	628	845	802	698	623	636	634	587	588	650	680	514	657	640	322	508	321	751	949	483	629	349	624	377	867	512	603
ID1318	LINE/L1	L1-3_BT	AAAGTGAGAGGATGGAAAAATATATTCCATGCAAATGGGAAG	196	132	145	136	139	150	182	163	143	150	165	142	161	125	181	170	100	142	172	72	121	88	176	206	117	141	95	240	112	178	82	148
ID1319	LINE/L1	L1-3_BT	AAAGTTAAGAGAATTCAGTACCACCAAACCAGCTTTACAACA	0	147	147	143	150	169	196	170	143	154	176	150	177	149	182	174	126	167	158	85	146	100	191	230	132	174	118	147	126	181	101	181
ID1320	LINE/L1	L1-3_BT	AAATAAAAACAAAAGTAAACAAGTGGGACCTGATTAAACTTA	365	232	257	259	267	269	355	277	259	246	295	288	240	220	293	249	180	286	270	143	211	144	297	402	223	270	179	136	154	341	209	310
ID1321	LINE/L1	L1-3_BT	AAATAAAACCACAATTGAAACCCAGGGGCAGTGTGGCTAAGG	89	67	78	57	71	69	78	63	46	55	62	70	68	59	107	71	47	67	60	29	42	39	59	89	51	66	46	56	58	81	36	76
ID1322	LINE/L1	L1-3_BT	AAATAACTTCTGAAGAGCAGAATAAAGTAAAAAGAATGAAAA	254	166	178	181	192	221	215	215	193	201	188	199	222	0	226	192	126	186	235	97	172	123	240	244	156	171	144	150	155	243	153	226
ID1323	LINE/L1	L1-3_BT	AAATAATAGCAAATGAAACAACTGACAAAGGATTAATTTCCA	457	327	375	402	352	358	438	442	361	362	374	377	362	305	403	366	307	351	404	185	300	249	432	526	328	370	272	290	246	439	286	360
ID1324	LINE/L1	L1-3_BT	AAATACTCTAGAAGGAATCAATAGCAGAATATCTGAAGCAGA	220	132	155	145	157	120	185	163	143	158	149	169	180	113	184	159	96	148	168	74	137	86	194	211	118	140	119	144	146	190	108	195
ID1325	LINE/L1	L1-3_BT	AAATAGATAGCCAATGGGAATTTGCTGTATGGCTCAGGAAAC	198	142	177	96	188	177	197	110	110	147	192	127	169	135	193	194	145	137	166	98	118	76	83	263	146	165	132	146	155	202	123	184
ID1326	LINE/L1	L1-3_BT	AAATGAAGGAACAAACTAGAAACACAGAAGTCCAAATAAATG	222	138	160	151	171	180	208	171	144	161	167	145	164	129	193	177	104	165	149	91	129	101	127	168	127	152	127	123	137	202	105	168
ID1327	LINE/L1	L1-3_BT	AAATGCAAGAATCAATTAACAAAGACCTAGAAGAATTAAAGA	199	141	155	147	165	156	188	179	150	149	157	157	150	118	205	177	91	134	158	95	142	112	190	204	150	153	113	119	128	178	124	175
ID1328	LINE/L1	L1-3_BT	AAATGGAGAAAATGCAAGAATCAATTAACAAAGACCTAGAAG	180	135	150	144	141	139	158	156	122	140	149	140	142	0	153	155	89	132	149	80	127	93	156	173	123	140	96	105	112	144	99	143
ID1329	LINE/L1	L1-3_BT	AAATGGTGGAAATAACTTCTGAAGAGCAGAATAAAGTAAAAA	229	150	180	171	179	190	194	204	186	181	174	193	198	133	203	178	112	171	192	88	157	101	219	226	144	146	123	145	141	218	136	190
ID1330	LINE/L1	L1-3_BT	AAATTAAAAATACTCTAGAAGGAATCAATAGCAGAATATCTG	217	132	159	143	158	115	181	158	125	151	149	161	156	114	189	160	101	157	168	75	124	89	188	192	112	137	116	139	138	186	122	196
ID1331	LINE/L1	L1-3_BT	AAATTAATAAGGAAACACAAGTCTTAAATGATACATTAGATG	210	137	165	158	171	163	178	167	122	158	167	168	179	153	217	186	102	154	160	87	144	89	207	215	148	170	119	116	107	191	102	179
ID1332	LINE/L1	L1-3_BT	AAATTAATCCTTTGTCAGTTGTTTCATTTGCTATTATTTTCT	470	353	405	417	383	393	445	456	372	370	378	403	394	334	448	393	318	381	413	208	332	257	485	579	350	394	275	302	263	449	303	384
ID1333	LINE/L1	L1-3_BT	AAATTCCCATTGGCTATCTATTTTACATATGGTAATGTAAGT	269	148	167	103	193	175	216	116	119	156	185	119	198	132	235	170	105	175	165	81	113	70	130	264	167	168	128	128	159	241	94	226
ID1334	LINE/L1	L1-3_BT	AAATTTACTGAGGTTTGATTTGTGACCCAAGATGTGGTCTAT	0	118	158	175	147	165	177	180	141	156	162	151	151	146	185	162	104	129	192	74	157	76	202	228	109	153	120	126	111	199	96	169
ID1335	LINE/L1	L1-3_BT	AACAAAATGGAGAAAATGCAAGAATCAATTAACAAAGACCTA	174	124	137	125	141	136	148	142	111	112	123	116	132	98	148	143	71	118	122	73	107	77	144	165	106	135	87	93	115	132	89	129
ID1336	LINE/L1	L1-3_BT	AACAAAATTCTGTAAAGCAATTATCCTTCAATTAAAAAATAA	311	203	210	209	240	231	279	241	180	208	219	255	238	193	316	202	169	232	241	109	187	159	246	334	194	213	167	194	201	278	218	273
ID1337	LINE/L1	L1-3_BT	AACAAACTAGAAACACAGAAGTCCAAATAAATGAAGAGGAAA	199	138	153	148	172	158	191	160	145	146	158	144	138	112	183	162	95	161	137	82	115	83	176	170	119	140	133	105	119	192	111	178
ID1338	LINE/L1	L1-3_BT	AACAACAAAATTCTGTAAAGCAATTATCCTTCAATTAAAAAA	363	265	272	278	295	299	352	281	235	280	292	288	292	230	378	279	232	289	292	123	246	194	305	360	254	280	218	232	252	353	275	346
ID1339	LINE/L1	L1-3_BT	AACAGACATAGAGAATAGACTTATGGACATGGGGAGAGGGGA	232	173	191	263	170	208	242	274	205	194	197	115	201	131	246	170	147	175	213	86	153	85	282	297	145	187	141	138	156	248	215	229
ID1340	LINE/L1	L1-3_BT	AACAGACATTTCTCCAAAGAAGACATACAGATGGCTAACAAA	2147	1055	1111	7646	939	1306	2175	9916	2899	2487	1221	3234	1090	1383	3621	1598	1014	1524	1570	786	1081	741	8761	4786	906	1546	682	1263	524	2146	1288	1088
ID1341	LINE/L1	L1-3_BT	AACAGCTGATCTGTGGCAGCCTAAATGGAATGAGAATCAGAC	158	102	119	102	137	131	132	122	107	108	100	99	107	92	148	130	88	124	104	55	93	73	154	123	91	106	86	79	111	135	118	129
ID1342	LINE/L1	L1-3_BT	AACAGGGGCTCTGTATCAACCTAGAGGGGTGGGATGGGGAGG	257	174	220	149	198	204	220	160	195	176	194	266	212	179	336	211	152	201	214	115	175	96	211	374	181	200	173	148	191	276	205	254
ID1343	LINE/L1	L1-3_BT	AACATATATATCAATAATTACTTTAAATGTAAATGGATTAAA	207	126	140	138	138	183	191	154	139	139	148	148	177	124	156	151	125	150	138	78	114	75	178	183	103	135	123	121	100	186	89	183
ID1344	LINE/L1	L1-3_BT	AACATGGAAACTTACATTACCATATGTAAAATAGATAGCCAA	452	278	299	224	294	308	423	257	214	296	339	226	314	234	481	288	226	289	336	149	247	119	288	483	279	295	237	239	310	452	164	411
ID1345	LINE/L1	L1-3_BT	AACATTCTCCAGGATAGACCACATCTTGGGTCACAAATCAAA	215	143	162	194	156	156	207	185	153	161	171	151	181	0	196	171	106	148	187	76	154	84	219	218	117	166	110	140	123	216	102	177
ID1346	LINE/L1	L1-3_BT	AACATTTGTTGTAAAGCTGGTTTGGTGGTACTGAATTCTCTT	0	144	162	0	0	170	183	0	137	145	166	136	0	162	195	191	119	174	160	75	145	103	191	232	129	169	113	149	126	174	102	166
ID1347	LINE/L1	L1-3_BT	AACCAACACAACATTGTAAAGCAATTATCCTCCAATTAAAAA	167	100	109	95	137	153	157	102	100	129	138	110	136	101	179	122	95	106	138	51	98	78	134	183	71	66	93	90	113	174	82	161
ID1348	LINE/L1	L1-3_BT	AACCACAATTGAAACCCAGGGGCAGTGTGGCTAAGGAAGAAG	81	57	68	60	58	60	70	64	45	53	57	70	65	52	97	62	50	65	61	21	46	41	61	74	44	59	40	44	52	78	40	70
ID1349	LINE/L1	L1-3_BT	AACCACCATATGACCCAGCAATCCCACTCCTAGGCATATACC	268	232	210	248	235	243	264	302	214	225	238	211	216	203	288	239	175	215	237	105	191	128	295	316	203	247	144	175	152	262	228	245
ID1350	LINE/L1	L1-3_BT	AACCCTAGGGAGTATCAAATAGTGAGAACTCACACAAAGGAA	110	56	66	101	54	83	79	110	85	59	75	70	81	48	129	75	59	72	86	47	70	43	103	127	92	56	54	58	57	104	46	77
ID1351	LINE/L1	L1-3_BT	AACCTAGAGGGGTGGGATGGGGAGGGAGATGGGAGGGAGGTT	0	95	124	183	139	113	159	199	159	96	127	161	95	109	190	129	92	115	124	66	99	55	212	229	127	124	74	85	107	149	187	132
ID1352	LINE/L1	L1-3_BT	AACCTATTATACAGAGTGAAGTGAGTCAGAAAGAGAAAGATA	271	186	211	231	209	178	254	264	217	210	216	168	203	187	234	232	139	201	207	105	172	124	268	259	171	214	158	159	173	252	191	240
ID1353	LINE/L1	L1-3_BT	AACCTCAACATGAATCAGCCATAGGTATACATATATCCCCTC	388	248	269	248	287	274	356	262	216	267	307	264	297	229	480	295	196	269	282	157	224	163	243	478	311	290	192	194	293	357	251	352
ID1354	LINE/L1	L1-3_BT	AACTAGAAACACAGAAGTCCAAATAAATGAAGAGGAAATAGG	0	129	148	144	154	141	183	150	136	131	146	131	129	0	179	151	78	158	127	75	124	83	102	154	107	131	117	98	119	176	103	170
ID1355	LINE/L1	L1-3_BT	AACTCAAACAGGGGCTCTGTATCAACCTAGAGGGGTGGGATG	363	236	296	179	262	301	301	192	228	247	256	339	285	236	437	265	205	239	283	144	252	154	253	457	238	267	240	210	270	379	243	329
ID1356	LINE/L1	L1-3_BT	AACTGGACAGCTACATGTAAAAGAATGAAATTAGAACACTTC	323	229	270	235	296	280	313	259	242	256	266	231	256	216	266	254	205	261	268	121	225	147	288	337	234	228	187	211	171	335	176	261
ID1357	LINE/L1	L1-3_BT	AACTTACATTACCATATGTAAAATAGATAGCCAATGGGAATT	264	145	163	109	191	177	217	120	119	156	185	119	194	136	236	165	110	176	170	81	115	73	126	260	163	168	130	131	161	239	93	229
ID1358	LINE/L1	L1-3_BT	AACTTCTGAAGAGCAGAATAAAGTAAAAAGAATGAAAAGAAC	205	124	135	145	147	166	169	173	136	151	154	148	162	119	182	149	102	144	177	78	135	92	178	200	116	131	107	121	111	179	110	184
ID1359	LINE/L1	L1-3_BT	AACTTTGCTAAATTCACTGATTAGCTCTAGTAATTTTCTGAT	322	200	237	271	230	272	276	276	245	200	260	247	260	219	264	228	188	230	229	124	235	152	303	328	165	246	181	210	157	303	170	239
ID1360	LINE/L1	L1-3_BT	AAGAAGACATACAGATGGCTAACAAACACATGAAAAGATGCT	0	1637	1766	0	0	0	8563	0	2857	2869	0	1891	0	2392	3808	3637	0	5297	2079	1486	1855	1276	8474	5196	886	3079	959	2563	935	8605	1316	5583
ID1361	LINE/L1	L1-3_BT	AAGAATACACCTTCTTCTCAAGTGCACATGGAACATTCTCCA	0	114	123	130	113	111	159	0	115	113	133	120	120	80	139	144	71	118	129	57	93	64	152	187	98	119	78	85	75	142	78	125
ID1362	LINE/L1	L1-3_BT	AAGAATCAATTAACAAAGACCTAGAAGAATTAAAGAATAAAC	185	144	153	129	144	145	165	156	147	137	134	150	154	0	184	169	83	148	160	98	126	92	170	180	136	150	108	108	110	172	108	155
ID1363	LINE/L1	L1-3_BT	AAGAATGAAATTAGAACACTTCCTAACACCATACACAAAGAT	339	261	276	312	277	270	349	344	265	255	292	241	282	0	325	259	204	259	274	141	257	160	373	404	239	292	189	210	177	340	237	269
ID1364	LINE/L1	L1-3_BT	AAGAATTCAGAATAATGATAGTAAAGATGATCAAAAACCTTG	200	121	130	124	143	155	167	150	117	137	154	135	141	118	173	151	93	121	145	63	126	78	143	189	116	139	103	118	113	181	102	171
ID1365	LINE/L1	L1-3_BT	AAGAATTTATTTACAGGGCAGCAATGGAGAAACAGACATAGA	162	95	104	143	109	132	160	168	146	134	133	99	142	100	159	109	120	123	148	53	124	74	183	213	93	104	76	100	91	166	137	140
ID1366	LINE/L1	L1-3_BT	AAGACAACCCTCAGAATGGGAGAAAATAATAGCAAATGAAAC	331	243	271	306	253	263	343	343	229	243	282	308	264	0	317	252	214	248	259	146	224	147	373	389	221	277	189	200	172	354	247	287
ID1367	LINE/L1	L1-3_BT	AAGACACATATAGACTGAAAGTGAGAGGATGGAAAAATATAT	205	116	142	127	143	154	185	147	122	186	170	149	159	127	177	158	104	167	198	65	127	82	184	183	128	152	108	212	111	186	92	160
ID1368	LINE/L1	L1-3_BT	AAGACATACAGATGGCTAACAAACACATGAAAAGATGCTCAA	7271	1670	1820	6525	1360	2184	9309	9282	3204	2889	1877	1874	1556	2443	3925	3650	1686	5308	2101	1523	1922	1306	8465	5200	906	3139	973	2643	966	8338	3429	5691
ID1369	LINE/L1	L1-3_BT	AAGACCTAAACAGACATTTCTCCAAAGAAGACATACAGATGG	536	375	370	407	368	424	478	402	401	366	378	367	378	391	464	421	286	427	410	209	345	248	445	553	338	407	287	312	286	481	320	385
ID1370	LINE/L1	L1-3_BT	AAGACTTGTGTTTCCTTATTAATTTTCTGTTTTGATGATCTG	225	152	175	164	163	163	200	196	157	157	172	171	175	141	197	186	113	166	164	90	143	104	206	206	142	188	134	137	113	210	115	177
ID1371	LINE/L1	L1-3_BT	AAGAGTAACATGGAAACTTACATTACCATATGTAAAATAGAT	365	232	228	202	219	255	357	237	177	240	283	173	260	198	392	247	183	247	264	142	217	67	249	404	238	247	203	196	235	379	159	326
ID1372	LINE/L1	L1-3_BT	AAGATAAAATGGTGGAAATAACTTCTGAAGAGCAGAATAAAG	242	153	184	168	192	197	191	198	195	190	174	196	200	150	203	191	118	164	201	94	157	106	214	251	142	164	126	152	157	222	128	183
ID1373	LINE/L1	L1-3_BT	AAGATATCAATGAGATCCATCTCATCTAATGTATCATTTAAG	181	125	155	145	155	165	165	170	117	129	138	124	159	111	171	168	95	126	154	86	115	96	182	176	106	143	102	111	120	175	93	175
ID1374	LINE/L1	L1-3_BT	AAGATGATCAAAAACCTTGAAAACAAAATGGAGAAAATGCAA	192	116	147	105	122	135	165	132	103	115	126	134	132	111	167	139	89	135	125	76	112	68	143	169	113	134	98	98	112	160	88	150
ID1375	LINE/L1	L1-3_BT	AAGATGTGGTCTATCCTGGAGAATGTTCCATGTGCACTTGAG	213	135	141	170	159	139	200	171	158	127	175	132	152	0	180	158	91	137	153	72	139	86	208	206	114	143	109	116	105	205	111	175
ID1376	LINE/L1	L1-3_BT	AAGCAAAAGAAAGCTGGAGTAGCAATCCTCATATCAGACAAA	237	152	185	173	159	186	220	183	156	155	175	148	182	153	189	176	128	172	173	97	132	92	206	224	154	168	118	142	127	213	108	186
ID1377	LINE/L1	L1-3_BT	AAGCAAAAGTTAAGAGAATTCAGTACCACCAAACCAGCTTTA	230	157	158	150	151	183	207	170	155	162	187	157	184	133	192	171	131	168	165	81	151	107	194	222	130	187	120	156	125	207	107	201
ID1378	LINE/L1	L1-3_BT	AAGCAGCTGCACCACCTCCACACCTGGCCCTCACAGGGGCAA	0	69	67	0	0	72	80	0	53	83	76	59	0	0	78	83	66	58	88	40	67	48	55	85	63	71	50	53	57	81	30	76
ID1379	LINE/L1	L1-3_BT	AAGCTTTTCAGACAAGCAAAAGTTAAGAGAATTCAGTACCAC	0	118	132	121	134	161	179	143	144	132	170	128	160	123	157	156	108	144	153	66	125	85	179	203	117	147	119	116	100	177	91	176
ID1380	LINE/L1	L1-3_BT	AAGGAAACACAAGTCTTAAATGATACATTAGATGAGATGGAT	187	152	158	147	173	165	167	152	109	146	149	142	157	136	184	184	102	133	158	92	133	84	182	197	118	176	101	120	107	158	93	159
ID1381	LINE/L1	L1-3_BT	AAGGAACAAACTAGAAACACAGAAGTCCAAATAAATGAAGAG	188	130	146	150	167	143	183	168	143	134	144	129	134	104	175	159	91	148	133	76	111	82	145	167	104	133	120	102	110	182	105	159
ID1382	LINE/L1	L1-3_BT	AAGGACTGTCTGATTCTCATTCCATTTAGGCTGCCACAGATC	140	111	122	114	142	136	117	139	99	117	109	122	122	95	143	129	99	121	108	55	98	74	152	134	68	114	105	93	121	125	119	115
ID1383	LINE/L1	L1-3_BT	AAGGATAATTGCTTTACAGAATTTTGCTGTTTTCTGTCAAAC	297	214	231	289	260	241	279	302	220	252	248	280	233	189	315	237	182	240	246	113	206	159	327	375	196	234	200	179	236	292	265	278
ID1384	LINE/L1	L1-3_BT	AAGGATAATTGCTTTACAGAATTTTGTTGTTTTCTGTCAAAC	740	519	510	575	579	600	720	592	497	545	590	541	622	484	826	565	457	532	571	262	466	350	649	766	507	543	422	439	541	685	550	684
ID1385	LINE/L1	L1-3_BT	AAGGGAGGGGATATATGTATACCTATGGCTGATTCATGTTGA	0	228	239	0	0	0	323	0	189	242	0	240	0	226	446	282	193	255	256	153	230	136	232	454	274	261	172	181	271	329	213	331
ID1386	LINE/L1	L1-3_BT	AAGGTGAAAAGACAACCCTCAGAATGGGAGAAAATAATAGCA	0	253	290	0	0	275	359	0	254	258	280	321	0	224	315	288	243	249	281	166	235	146	358	421	223	287	186	224	202	346	240	317
ID1387	LINE/L1	L1-3_BT	AAGTCTACAAACAATAAATGCTGGAGAGGGTGTGGAGAAAAG	0	508	506	845	494	588	799	752	657	582	579	589	545	527	595	623	453	610	596	310	469	290	683	887	447	586	331	577	353	817	478	577
ID1388	LINE/L1	L1-3_BT	AAGTCTATTCTCTATGTCTGTTTCTCCATTGCTGCCCTGTAA	0	103	107	134	109	119	139	153	130	115	103	91	123	91	179	109	92	110	129	59	107	56	193	208	97	105	73	82	78	152	140	133
ID1389	LINE/L1	L1-3_BT	AAGTCTTAAATGATACATTAGATGAGATGGATCTCATTGATA	182	133	147	152	150	157	148	161	126	138	132	120	137	0	171	169	94	121	155	86	117	76	182	178	107	159	94	100	112	167	101	155
ID1390	LINE/L1	L1-3_BT	AAGTGAGAGGATGGAAAAATATATTCCATGCAAATGGGAAGC	192	126	142	137	131	149	175	157	142	148	163	130	160	118	178	165	95	138	166	66	119	80	168	201	119	137	97	232	105	173	78	145
ID1391	LINE/L1	L1-3_BT	AAGTTAAGAGAATTCAGTACCACCAAACCAGCTTTACAACAA	229	152	153	151	156	174	197	179	150	163	177	151	182	0	184	182	130	168	167	86	148	109	200	236	139	179	117	155	125	186	109	183
ID1392	LINE/L1	L1-3_BT	AAGTTTAATCAGGTCCCACTTGTTTACTTTTGTTTTTATTTC	357	222	250	253	260	260	347	270	251	242	290	281	237	0	285	241	175	272	261	138	210	137	286	401	219	258	180	131	144	339	201	300
ID1393	LINE/L1	L1-3_BT	AAGTTTCCATGTTACTCTTTCCATACATCTCACCCTCTCCTC	0	277	311	0	0	303	344	0	286	308	311	274	0	279	408	305	212	296	308	169	269	48	382	470	257	305	232	233	268	358	257	316
ID1394	LINE/L1	L1-3_BT	AATAAAAACAAAAGTAAACAAGTGGGACCTGATTAAACTTAA	359	231	253	263	264	267	350	281	255	246	295	285	235	214	282	243	179	282	269	140	211	145	302	408	213	266	178	135	151	329	212	309
ID1395	LINE/L1	L1-3_BT	AATAAAACCACAATTGAAACCCAGGGGCAGTGTGGCTAAGGA	92	67	81	61	71	70	79	67	47	58	61	73	70	59	107	72	48	69	59	28	43	39	65	88	53	68	49	54	60	83	37	78
ID1396	LINE/L1	L1-3_BT	AATAAAACCACCATATGACCCAGCAATCCCACTCCTAGGCAT	327	266	253	316	244	282	312	354	260	266	292	247	233	243	315	290	200	248	271	124	235	153	355	371	251	278	162	205	179	314	251	289
ID1397	LINE/L1	L1-3_BT	AATAACTTCTGAAGAGCAGAATAAAGTAAAAAGAATGAAAAG	239	163	170	172	188	211	206	210	176	192	181	189	215	132	220	192	123	182	226	98	171	109	232	248	153	169	137	139	143	233	146	218
ID1398	LINE/L1	L1-3_BT	AATAATAGCAAATGAAACAACTGACAAAGGATTAATTTCCAA	456	328	381	408	357	353	443	444	365	364	379	381	360	303	400	370	311	354	405	186	304	246	440	534	325	369	274	289	246	443	286	366
ID1399	LINE/L1	L1-3_BT	AATAATGATAGTAAAGATGATCAAAAACCTTGAAAACAAAAT	187	104	129	100	129	123	151	121	121	100	126	122	120	100	160	132	81	127	113	65	110	60	107	160	110	127	90	92	109	156	87	147
ID1400	LINE/L1	L1-3_BT	AATACAATATTGTAAAGTAATTAACCTCCAATTAAAATAAAT	969	1565	1873	2	2083	2159	914	5	7	1881	2003	37	1826	1777	2	2050	1319	669	2098	1034	1764	1145	4	2	2	1964	1418	1662	1886	953	8	874
ID1401	LINE/L1	L1-3_BT	AATACACAGAAATCACTTGCATTTCTATATACTAACAATGAA	271	159	215	221	199	230	258	262	203	201	215	207	195	176	218	230	147	189	210	103	169	114	234	280	205	208	156	159	135	258	155	229
ID1402	LINE/L1	L1-3_BT	AATACACCTTCAGACACAGAAGTGCATGCAGAACACCAGCTG	139	104	104	84	97	68	105	104	69	97	117	114	111	79	137	101	78	99	116	44	101	82	92	144	85	107	91	74	101	126	66	110
ID1403	LINE/L1	L1-3_BT	AATACACCTTCTTCTCAAGTGCACATGGAACATTCTCCAGGA	171	110	129	130	108	114	167	137	125	121	144	133	127	83	148	140	71	114	132	62	99	75	158	197	101	114	82	88	82	152	75	135
ID1404	LINE/L1	L1-3_BT	AATACTCTAGAAGGAATCAATAGCAGAATATCTGAAGCAGAA	0	136	151	0	0	0	184	0	143	156	147	167	0	109	185	153	97	141	166	68	132	80	190	207	117	137	115	147	141	188	105	187
ID1405	LINE/L1	L1-3_BT	AATAGACTTATGGACATGGGGAGAGGGGAGGAGAGGGTGAGA	258	171	210	241	190	230	267	278	243	219	219	197	233	169	247	197	146	209	204	104	175	92	338	312	150	196	166	135	178	273	254	249
ID1406	LINE/L1	L1-3_BT	AATAGATAGCCAATGGGAATTTGCTGTATGGCTCAGGAAACT	0	138	173	0	0	0	190	0	113	143	182	124	0	126	190	190	141	125	165	97	120	75	79	263	136	157	121	140	146	194	118	178
ID1407	LINE/L1	L1-3_BT	AATAGCAAATGAAACAACTGACAAAGGATTAATTTCCAAAAT	469	326	383	410	348	358	457	455	361	367	376	379	367	314	397	371	322	354	408	185	320	244	447	539	321	376	275	296	241	459	290	375
ID1408	LINE/L1	L1-3_BT	AATATATTTTTCCATCCTCTCACTTTCAGTCTATATGTGTCT	200	111	137	124	137	150	179	145	115	178	161	149	151	123	174	152	99	162	190	63	127	77	181	179	130	146	109	215	106	184	88	154
ID1409	LINE/L1	L1-3_BT	AATATTACTCAGCCATAAAAAGGAACACATTTGAGTCAGTTC	0	123	138	151	126	127	169	0	158	195	156	145	162	125	197	138	110	149	165	70	132	99	174	252	138	141	114	127	125	184	143	161
ID1410	LINE/L1	L1-3_BT	AATATTCCATTGTGTATATGTACCACAACTTCTTTATCCATT	294	166	133	251	232	170	273	285	207	231	225	181	228	197	277	224	169	178	245	94	215	136	278	305	202	162	148	186	133	277	215	228
ID1411	LINE/L1	L1-3_BT	AATATTGTAAAGTAATTAGCCTCCAATTAAAATAAATAAATT	2733	1772	1945	471	1993	2187	2472	573	425	1964	2065	904	2002	1671	846	2127	1375	1961	2127	1033	1804	1118	632	902	484	1986	1475	1576	1850	2646	459	2334
ID1412	LINE/L1	L1-3_BT	AATATTGTAGTGGTTTTTGCCATACATTGACATGAATCAGCC	606	357	393	4168	408	454	579	4385	3474	417	477	457	419	359	2994	417	335	396	432	217	353	234	5791	3520	357	379	270	325	377	568	4060	539
ID1413	LINE/L1	L1-3_BT	AATCAATTAACAAAGACCTAGAAGAATTAAAGAATAAACATA	152	117	126	102	125	112	136	136	119	115	129	107	136	88	135	134	69	125	125	84	100	81	127	128	112	129	96	90	93	141	93	131
ID1414	LINE/L1	L1-3_BT	AATCAGCCATAGGTATACATATATCCCCTCCCTTTTGAACCT	266	174	180	155	206	203	252	170	100	187	189	181	214	149	318	200	154	181	187	114	152	85	143	322	192	194	137	143	175	263	138	250
ID1415	LINE/L1	L1-3_BT	AATCAGTGAATTTAGCAAAGTTGCAGGATACAAAATCAATAC	260	138	183	197	174	210	235	210	209	191	182	215	224	182	245	201	144	181	198	82	146	120	242	286	161	174	145	168	125	236	139	199
ID1416	LINE/L1	L1-3_BT	AATCAGTGAGCTGGAAGATAAAATGGTGGAAATAACTTCTGA	209	146	172	175	185	168	178	180	174	146	177	168	168	124	211	176	83	139	154	81	139	93	203	228	136	159	123	130	135	191	109	161
ID1417	LINE/L1	L1-3_BT	AATCCCACTCCTAGGCATATACCCTGAGGAAACCAAAATTGA	306	207	193	250	234	186	296	278	225	199	203	232	209	0	274	222	149	230	234	114	157	110	306	303	195	223	140	144	138	289	233	271
ID1418	LINE/L1	L1-3_BT	AATCCTTTGTCAGTTGTTTCATTTGCTATTATTTTCTCCCAT	454	344	373	404	350	385	433	454	348	348	370	440	361	304	450	366	284	342	386	195	296	236	461	551	320	370	247	269	246	421	301	385
ID1419	LINE/L1	L1-3_BT	AATCTAGAAAAATGGTACTGAAGAATTTATTTACAGGGCAGC	0	137	142	179	163	139	174	183	156	148	159	107	147	126	197	162	130	152	162	68	126	104	219	230	117	142	109	129	125	173	171	147
ID1420	LINE/L1	L1-3_BT	AATGAAGGAACAAACTAGAAACACAGAAGTCCAAATAAATGA	223	141	163	148	177	182	209	168	149	160	166	151	164	125	196	182	106	164	149	93	133	103	128	166	129	155	127	122	141	201	105	170
ID1421	LINE/L1	L1-3_BT	AATGATAGTAAAGATGATCAAAAACCTTGAAAACAAAATGGA	0	101	127	0	0	0	150	0	121	0	0	115	0	102	172	124	0	124	111	55	115	60	114	155	106	116	88	89	101	152	83	144
ID1422	LINE/L1	L1-3_BT	AATGATCAAGGGATCAATCCAAGAGGAAGACATAACAATTGT	0	108	124	135	121	134	178	173	134	126	135	127	139	81	147	122	80	132	132	56	141	56	195	209	95	126	77	99	94	170	103	162
ID1423	LINE/L1	L1-3_BT	AATGCAAGAATCAATTAACAAAGACCTAGAAGAATTAAAGAA	0	140	151	0	0	0	183	0	144	146	0	153	0	115	198	169	88	128	156	91	145	109	188	194	145	149	108	115	124	176	121	174
ID1424	LINE/L1	L1-3_BT	AATGCAGAAGAATACACCTTCTTCTCAAGTGCACATGGAACA	145	106	121	131	117	107	153	140	128	105	118	102	104	79	129	137	76	124	121	48	90	67	162	193	96	117	75	82	75	144	71	127
ID1425	LINE/L1	L1-3_BT	AATGGAGAAAATGCAAGAATCAATTAACAAAGACCTAGAAGA	0	152	168	163	164	157	181	178	141	149	165	150	158	0	178	171	99	148	169	88	143	111	185	203	143	159	110	122	122	163	112	166
ID1426	LINE/L1	L1-3_BT	AATGGAGAAACAGACATAGAGAATAGACTTATGGACATGGGG	197	127	149	208	122	153	195	237	170	159	159	92	145	96	243	141	117	142	175	70	141	78	235	252	113	132	96	124	120	220	172	176
ID1427	LINE/L1	L1-3_BT	AATGGCCATCATCAAAAAGTCTACAAACAATAAATGCTGGAG	354	252	264	302	256	237	307	338	287	292	266	272	295	238	358	285	229	268	310	139	239	172	395	457	232	269	198	225	205	339	278	284
ID1428	LINE/L1	L1-3_BT	AATGGGAATTTGCTGTATGGCTCAGGAAACTCAAACAGGGGC	191	175	157	73	186	170	186	86	109	158	178	154	166	124	190	183	134	122	171	94	135	92	90	255	128	178	144	120	157	200	90	177
ID1429	LINE/L1	L1-3_BT	AATGGGAGAAAATAATAGCAAATGAAACAACTGACAAAGGAT	450	341	375	404	349	374	429	448	340	348	366	435	361	306	444	364	288	345	389	196	296	238	459	540	330	365	245	275	243	419	302	381
ID1430	LINE/L1	L1-3_BT	AATGGTGGAAATAACTTCTGAAGAGCAGAATAAAGTAAAAAG	216	141	172	155	170	179	188	185	173	168	160	176	185	119	191	170	100	153	185	84	148	91	204	209	132	139	114	124	132	211	126	184
ID1431	LINE/L1	L1-3_BT	AATGTAAGACCAGAAACTATAAAACTCTTAGAGGAAAACATA	372	250	280	302	283	298	357	328	275	297	304	286	312	262	343	307	216	261	329	154	275	166	329	443	282	282	208	325	198	350	216	290
ID1432	LINE/L1	L1-3_BT	AATGTAAGTTTCCATGTTACTCTTTCCATACATCTCACCCTC	332	272	309	257	304	302	364	266	263	293	291	260	325	248	437	305	204	302	296	163	250	39	359	455	244	300	231	209	260	364	236	327
ID1433	LINE/L1	L1-3_BT	AATGTATGGCAAAAACCACTACAATATTGTAAAGTAATTAGC	0	353	392	4169	0	426	564	0	3432	418	451	485	420	0	3129	404	301	396	429	184	342	222	5745	3592	409	377	269	299	375	586	4100	539
ID1434	LINE/L1	L1-3_BT	AATGTTCCATGTGCACTTGAGAAGAAGGTGTATTCTTCTGCA	0	104	120	132	114	106	150	141	123	102	118	103	102	77	135	133	76	122	120	46	87	62	156	191	95	117	76	79	74	139	70	124
ID1435	LINE/L1	L1-3_BT	AATTAAAAATACTCTAGAAGGAATCAATAGCAGAATATCTGA	222	129	158	146	161	114	188	161	130	160	150	168	157	116	191	160	107	161	174	75	129	93	192	189	115	135	120	143	142	188	124	198
ID1436	LINE/L1	L1-3_BT	AATTAATAAGGAAACACAAGTCTTAAATGATACATTAGATGA	205	134	164	156	170	160	179	162	124	158	163	167	182	152	217	183	102	148	161	87	142	89	203	216	148	165	118	117	108	190	102	178
ID1437	LINE/L1	L1-3_BT	AATTAATCCTTTGTCAGTTGTTTCATTTGCTATTATTTTCTC	0	335	380	400	357	371	428	429	351	356	369	387	374	316	438	371	301	358	383	196	315	244	460	541	328	372	270	282	250	436	293	372
ID1438	LINE/L1	L1-3_BT	AATTACTTTACAATATTGTAGTGGTTTTTGCCATACATTGAC	539	311	341	4033	376	392	504	4438	3281	380	409	470	390	292	3007	372	290	361	394	178	317	208	5546	3390	327	347	226	281	338	521	3951	482
ID1439	LINE/L1	L1-3_BT	AATTACTTTACAATATTGTATTGGTTTTGCCATACATCAACA	2929	2372	2796	1	2991	3067	2873	0	0	2815	2941	8	2671	2537	0	3060	2098	2161	3213	1487	2558	1686	0	2	0	3046	1896	2382	2706	2941	0	2675
ID1440	LINE/L1	L1-3_BT	AATTCAGAATAATGATAGTAAAGATGATCAAAAACCTTGAAA	230	150	164	159	175	183	205	175	144	160	168	163	176	142	188	184	115	143	164	85	158	90	159	205	145	174	122	132	142	209	108	201
ID1441	LINE/L1	L1-3_BT	AATTCTTCTAGGTCTTTGTTAATTGATTCTTGCATTTTCTCC	186	146	150	149	151	139	180	168	136	149	151	143	134	118	177	161	88	136	143	84	124	97	173	200	143	152	101	116	121	162	118	163
ID1442	LINE/L1	L1-3_BT	AATTGAAGGATAATTGCTTTACAGAATTTTGTTGTTTTCTGT	411	304	284	319	327	328	388	316	274	315	323	302	333	247	406	313	243	292	321	142	263	205	321	379	269	317	244	240	286	374	299	378
ID1443	LINE/L1	L1-3_BT	AATTGCTTTACAGAATTTTGTTGTTTTCTGTCAAACCTCAAC	570	378	393	421	437	437	543	434	358	432	457	394	461	375	695	428	309	426	434	216	361	267	505	642	388	413	290	315	421	518	411	544
ID1444	LINE/L1	L1-3_BT	AATTGGAGGATAATTGCTTTACAATGTTGTGTTGGTTTCTGC	180	109	122	92	132	153	170	94	95	126	145	126	141	101	198	130	87	115	147	67	109	91	139	196	64	67	101	85	120	192	68	169
ID1445	LINE/L1	L1-3_BT	AATTGTCTGAGTCAGAGGAGAAACATTTAAGGCTGAGAGTGA	127	82	93	77	99	83	111	88	73	109	99	74	89	78	103	51	66	79	100	47	79	61	95	99	61	78	63	74	74	113	78	103
ID1446	LINE/L1	L1-3_BT	AATTGTTATGTCTTCCTCTTGGATTGATCCCTTGATCATTAT	221	112	131	139	135	143	189	167	133	134	147	134	142	80	155	126	76	140	141	68	138	57	188	200	104	129	86	93	96	182	97	170
ID1447	LINE/L1	L1-3_BT	AATTTACTGAGGTTTGATTTGTGACCCAAGATGTGGTCTATC	183	124	151	176	142	161	180	170	136	154	160	152	153	138	188	159	102	128	187	73	151	73	198	228	113	152	108	122	109	192	97	167
ID1448	LINE/L1	L1-3_BT	AATTTATTTACAGGGCAGCAATGGAGAAACAGACATAGAGAA	159	110	114	136	111	131	163	169	151	127	133	96	143	112	164	119	115	123	160	60	124	79	176	215	98	112	81	93	88	172	137	140
ID1449	LINE/L1	L1-3_BT	AATTTCATTCTTTTACATGTAGCTGTCCAGTTTTCCCAGCAC	359	241	271	247	276	278	345	291	255	250	256	221	286	196	300	275	194	268	263	135	214	153	299	376	221	244	192	193	189	339	202	296
ID1450	LINE/L1	L1-3_BT	AATTTGCTGTATGGCTCAGGAAACTCAAACAGGGGCTCTGTA	420	338	346	189	360	372	397	180	218	362	376	323	367	287	475	366	266	278	354	169	329	192	192	549	279	346	283	241	335	412	189	414
ID1451	LINE/L1	L1-3_BT	AATTTTCTTAAATTTACTGAGGTTTGATTTGTGACCCAAGAT	204	141	175	176	162	189	192	204	154	153	168	182	172	135	208	172	120	164	198	80	152	87	215	226	120	168	130	127	119	207	98	181
ID1452	LINE/L1	L1-3_BT	AATTTTGGTTTCCTCAGGGTATATGCCTAGGAGTGGGATTGC	287	194	175	209	206	171	274	243	195	170	186	215	186	144	253	198	134	211	210	108	145	97	282	284	182	205	126	137	129	254	199	239
ID1453	LINE/L1	L1-3_BT	AATTTTGTTGTTTTCTGTCAAACCTCAACATGAATCAGCCAT	550	353	372	383	427	411	535	377	325	393	437	392	438	0	578	411	321	363	443	219	338	256	431	605	410	394	278	325	404	513	401	535
ID1454	LINE/L1	L1-3_BT	ACAAAATGGAGAAAATGCAAGAATCAATTAACAAAGACCTAG	165	117	127	121	135	124	137	139	107	112	122	115	130	101	145	136	71	115	124	71	106	77	137	167	100	126	84	93	103	125	89	124
ID1455	LINE/L1	L1-3_BT	ACAAACTAGAAACACAGAAGTCCAAATAAATGAAGAGGAAAT	206	131	148	147	165	150	193	158	137	136	151	140	126	0	176	154	81	163	130	79	115	79	116	161	114	135	121	102	118	188	105	176
ID1456	LINE/L1	L1-3_BT	ACAAATGAAGGAACAAACTAGAAACACAGAAGTCCAAATAAA	220	133	157	152	159	174	205	170	139	155	152	131	154	123	187	162	97	160	148	84	125	107	109	164	128	151	128	115	134	207	100	168
ID1457	LINE/L1	L1-3_BT	ACAACAAAATTCTGTAAAGCAATTATCCTTCAATTAAAAAAT	250	181	195	184	204	201	235	195	161	181	191	213	208	153	292	182	152	196	199	93	158	119	210	270	170	190	149	151	181	231	182	236
ID1458	LINE/L1	L1-3_BT	ACAAGTCTTAAATGATACATTAGATGAGATGGATCTCATTGA	174	127	137	146	144	145	143	156	125	126	120	110	137	106	169	158	89	117	134	75	105	70	180	169	106	155	88	101	106	160	88	139
ID1459	LINE/L1	L1-3_BT	ACAATATTGTAAAGTAATTAGCCTCCAATTAAAATAAATAAA	2827	1826	2045	562	2083	2272	2561	703	522	2045	2141	1104	2116	1734	981	2203	1440	1976	2209	1060	1850	1152	781	1047	553	2102	1515	1628	1899	2731	565	2422
ID1460	LINE/L1	L1-3_BT	ACAATATTGTAGTGGTTTTTGCCATACATTGACATGAATCAG	567	329	368	4275	394	424	534	4549	3381	413	430	461	397	339	2989	384	323	373	409	200	334	216	5774	3459	330	353	247	309	352	524	3987	502
ID1461	LINE/L1	L1-3_BT	ACACAGAAATCACTTGCATTTCTATATACTAACAATGAAAAA	274	153	210	224	191	224	255	263	196	202	207	208	198	182	236	226	156	195	205	102	166	112	249	288	199	203	149	157	131	248	155	227
ID1462	LINE/L1	L1-3_BT	ACACATATAGACTGAAAGTGAGAGGATGGAAAAATATATTCC	196	106	127	120	133	144	170	144	120	169	155	140	151	122	174	148	92	143	177	55	121	75	178	176	127	134	99	207	110	177	76	143
ID1463	LINE/L1	L1-3_BT	ACACCAATGGACAGATCATCAAAACAGAAAATTAATAAGGAA	248	150	193	174	166	181	222	215	163	189	190	177	185	146	217	198	124	181	197	98	148	129	231	242	141	172	127	154	136	253	122	191
ID1464	LINE/L1	L1-3_BT	ACACCTTCAGACACAGAAGTGCATGCAGAACACCAGCTGAGA	139	108	114	86	111	76	118	99	77	119	138	120	128	95	139	112	85	108	129	47	109	97	94	141	93	106	104	80	98	134	75	114
ID1465	LINE/L1	L1-3_BT	ACACCTTCTTCTCAAGTGCACATGGAACATTCTCCAGGATAG	0	93	112	117	104	103	152	117	111	106	122	117	106	85	136	118	63	104	114	49	95	64	143	183	89	96	76	82	65	151	75	123
ID1466	LINE/L1	L1-3_BT	ACACTACATAATGATCAAGGGATCAATCCAAGAGGAAGACAT	0	114	129	0	0	0	171	0	137	0	0	120	0	80	145	139	0	150	133	64	124	54	184	176	101	130	86	84	96	173	86	158
ID1467	LINE/L1	L1-3_BT	ACACTGCCCCTGGGTTTCAATTGTGGTTTTATTTCCACCTCT	104	75	95	64	82	73	74	74	56	70	74	71	77	54	113	76	59	77	70	37	61	39	69	95	55	82	48	47	73	87	55	71
ID1468	LINE/L1	L1-3_BT	ACAGAAAACAACAAAATTCTGTAAAGCAATTATCCTTCAATA	0	222	227	247	243	277	343	283	214	234	279	255	288	210	423	243	205	276	274	117	222	158	288	369	240	234	189	191	258	359	259	334
ID1469	LINE/L1	L1-3_BT	ACAGAAAACAGCAAAATTCTGTAAAGCAATTATCCTTCAATA	0	170	182	229	210	203	235	253	188	196	208	231	212	180	280	183	165	197	194	85	179	123	257	319	169	179	149	155	194	245	232	252
ID1470	LINE/L1	L1-3_BT	ACAGAATTTTGCTGTTTTCTGTCAAACCTCAACATGAATCAG	256	200	196	255	225	207	258	255	208	235	214	234	209	178	286	223	170	207	247	111	174	111	287	318	146	220	174	197	213	250	229	260
ID1471	LINE/L1	L1-3_BT	ACAGAATTTTGTTGTTTTCTGTCAAACCTCAACATGAATCAG	551	393	384	420	449	430	528	407	337	416	446	383	446	374	611	426	299	388	440	225	358	252	477	618	384	431	296	313	412	519	421	528
ID1472	LINE/L1	L1-3_BT	ACAGACATAGAGAATAGACTTATGGACATGGGGAGAGGGGAG	214	158	177	251	160	194	228	263	198	182	185	111	192	122	235	160	144	164	202	80	131	81	263	273	133	176	133	130	146	243	209	222
ID1473	LINE/L1	L1-3_BT	ACAGACATTTCTCCAAAGAAGACATACAGATGGCTAACAAAC	2102	1019	1071	7471	921	1264	2107	9839	2787	2420	1166	3154	1044	0	3578	1561	970	1474	1516	761	1044	708	8725	4749	844	1504	656	1204	503	2093	1257	1049
ID1474	LINE/L1	L1-3_BT	ACAGAGCCCCTGTTTGAGTTTCCTGAGCCATACAGCAAATTC	417	342	344	200	357	370	404	202	234	363	375	322	378	0	464	360	265	269	354	167	337	199	217	553	279	349	291	248	331	412	201	420
ID1475	LINE/L1	L1-3_BT	ACAGATCAGCTGTTTCACTCTCAGCCTTAAATGTTTCTCCTC	132	103	106	101	104	86	127	112	89	125	104	123	88	86	138	49	97	109	101	46	97	69	124	127	59	104	83	87	98	111	96	133
ID1476	LINE/L1	L1-3_BT	ACAGATCATCAAAACAGAAAATTAATAAGGAAACACAAGTCT	0	151	173	160	0	164	199	0	157	163	173	171	175	140	191	184	114	163	165	91	146	108	204	198	139	186	134	141	113	210	114	175
ID1477	LINE/L1	L1-3_BT	ACAGATGAATGGATAAAGAAGTTGTGGTACATATACACAATG	289	155	126	243	240	189	258	286	210	234	239	199	216	188	254	237	154	185	269	85	203	128	280	302	193	148	151	172	137	269	214	223
ID1478	LINE/L1	L1-3_BT	ACAGCAAATTCCCATTGGCTATCTATTTTACATATGGTAATG	236	146	173	89	193	166	204	109	119	141	182	127	169	127	204	178	121	145	156	86	93	66	119	244	149	157	109	127	157	215	107	213
ID1479	LINE/L1	L1-3_BT	ACAGCTGATCTGTGGCAGCCTAAATGGAATGAGAATCAGACA	157	104	119	104	135	125	126	121	104	110	98	98	108	90	140	130	82	123	99	53	91	70	153	122	86	106	87	78	111	131	115	124
ID1480	LINE/L1	L1-3_BT	ACAGGGGCTCTGTATCAACCTAGAGGGGTGGGATGGGGAGGG	228	155	197	140	181	196	190	154	183	159	171	243	190	162	318	192	133	174	199	103	161	92	204	351	178	181	160	131	180	248	197	217
ID1481	LINE/L1	L1-3_BT	ACATAATGATCAAGGGATCAATCCAAGAGGAAGACATAACAA	0	122	142	139	131	150	173	0	138	137	150	142	152	80	149	133	77	142	144	75	130	61	189	202	108	138	95	88	95	175	86	161
ID1482	LINE/L1	L1-3_BT	ACATACAGATGGCTAACAAACACATGAAAAGATGCTCAACAT	7188	1600	1774	6329	1332	2115	9187	9152	3116	2837	1789	1768	1475	2344	3898	3564	1594	5140	2011	1478	1822	1230	8402	5115	858	3015	856	2536	974	8167	3381	5661
ID1483	LINE/L1	L1-3_BT	ACATAGAGAATAGACTTATGGACATGGGGAGAGGGGAGGAGA	217	167	190	245	170	203	230	270	216	190	197	141	205	130	231	165	132	185	206	85	141	89	294	280	138	188	135	121	158	252	238	228
ID1484	LINE/L1	L1-3_BT	ACATATAGACTGAAAGTGAGAGGATGGAAAAATATATTCCAT	217	123	146	135	149	162	185	160	139	177	181	151	166	0	171	166	105	148	186	70	132	84	186	185	139	151	100	223	124	186	75	155
ID1485	LINE/L1	L1-3_BT	ACATATATCCCCTCCCTTTTGAACCTCCCTCCCATCTCCCTC	154	103	101	140	127	123	144	160	83	92	124	138	131	94	198	133	82	108	107	57	99	71	165	174	101	106	83	93	93	156	124	133
ID1486	LINE/L1	L1-3_BT	ACATATGGTAATGTAAGTTTCCATGTTACTCTTTCCATACAT	0	237	257	175	255	270	356	198	173	249	265	180	257	200	387	244	162	254	278	144	229	46	236	389	206	259	188	172	220	363	153	332
ID1487	LINE/L1	L1-3_BT	ACATCAGGAATACACCTTCAGACACAGAAGTGCATGCAGAAC	0	99	100	0	0	0	106	0	79	0	0	109	0	64	142	98	0	86	97	36	98	62	118	142	81	98	84	62	98	117	89	114
ID1488	LINE/L1	L1-3_BT	ACATCTAGGTTGCTTCCATGTTCTAGCTATTGTAAATAGTGC	420	266	332	344	328	352	451	383	356	323	353	283	323	323	374	312	266	335	350	142	282	227	432	462	268	277	284	292	259	430	306	389
ID1489	LINE/L1	L1-3_BT	ACATCTCACCCTCTCCTCCCCTCTCCCCATGTCCATAAGTCT	298	214	234	296	235	271	269	336	273	237	253	215	274	188	272	243	157	229	218	140	186	102	375	344	172	245	186	147	206	287	284	264
ID1490	LINE/L1	L1-3_BT	ACATCTTGGGTCACAAATCAAACCTCAGTAAATTTAAGAAAA	234	151	198	205	184	204	213	237	177	191	204	203	196	167	245	197	147	183	224	97	189	110	253	256	145	177	150	148	149	243	120	197
ID1491	LINE/L1	L1-3_BT	ACATGAATCAGCCATAGGTATACATATATCCCCTCCCTTTTG	345	195	210	182	251	259	307	205	173	226	243	218	263	0	414	250	188	231	229	136	218	129	216	444	251	219	148	171	220	315	199	312
ID1492	LINE/L1	L1-3_BT	ACATGCAGAGGTGGAAATAAAACCACAATTGAAACCCAGGGG	73	59	70	46	58	62	49	61	36	45	44	50	53	0	81	61	30	43	58	27	36	23	55	75	40	55	30	27	45	63	43	46
ID1493	LINE/L1	L1-3_BT	ACATGGAAACTTACATTACCATATGTAAAATAGATAGCCAAT	256	153	156	100	179	163	219	122	111	152	183	120	168	143	241	163	114	169	170	84	113	67	115	257	159	174	137	119	159	253	85	217
ID1494	LINE/L1	L1-3_BT	ACATGGAAGCAACCTAGATGTCCATCAACAGATGAATGGATA	359	187	208	221	190	240	420	242	203	241	245	199	225	0	259	225	240	262	265	118	283	173	239	306	517	228	515	308	155	429	192	292
ID1495	LINE/L1	L1-3_BT	ACATGGGGAGAGGGGAGGAGAGGGTGAGATGTATGGAAAGAG	262	184	212	208	206	218	247	257	230	220	224	179	231	171	281	211	133	178	211	111	157	34	333	357	173	204	158	151	181	248	233	237
ID1496	LINE/L1	L1-3_BT	ACATGTAAAAGAATGAAATTAGAACACTTCCTAACACCATAC	294	201	230	259	230	237	249	283	222	218	218	180	230	184	270	221	180	217	224	117	192	130	322	325	185	213	146	176	135	276	219	213
ID1497	LINE/L1	L1-3_BT	ACATTACCATATGTAAAATAGATAGCCAATGGGAATTTGCTG	236	142	167	84	190	167	204	106	116	144	182	122	174	127	204	176	119	150	157	84	98	70	121	248	145	159	108	127	152	210	98	203
ID1498	LINE/L1	L1-3_BT	ACATTCTCCAGGATAGACCACATCTTGGGTCACAAATCAAAC	205	128	146	180	142	151	201	171	145	153	155	147	172	119	192	156	100	137	182	69	147	78	207	211	107	150	103	124	109	208	95	165
ID1499	LINE/L1	L1-3_BT	ACATTTCTCCAAAGAAGACATACAGATGGCTAACAAACACAT	7100	1577	1742	7512	1330	2124	8403	9427	2787	2801	1785	3110	1444	2174	3617	3560	1458	5132	2015	1475	1789	1105	8738	4816	861	3004	989	2036	890	8428	1271	5531
ID1500	LINE/L1	L1-3_BT	ACATTTGTTGTAAAGCTGGTTTGGTGGTACTGAATTCTCTTA	0	137	156	0	0	0	176	0	135	144	0	137	0	158	190	183	117	168	157	71	136	98	186	232	127	159	105	147	123	167	101	161
ID1501	LINE/L1	L1-3_BT	ACCACAATTGAAACCCAGGGGCAGTGTGGCTAAGGAAGAAGA	0	62	66	0	0	0	71	0	47	0	0	68	0	51	96	63	0	67	63	21	46	39	61	75	42	61	41	43	52	78	38	70
ID1502	LINE/L1	L1-3_BT	ACCACATCTTGGGTCACAAATCAAACCTCAGTAAATTTAAGA	201	138	177	184	170	186	193	191	146	160	188	180	176	157	210	178	132	141	197	97	169	87	212	238	129	170	142	139	134	218	112	176
ID1503	LINE/L1	L1-3_BT	ACCACCATATGACCCAGCAATCCCACTCCTAGGCATATACCC	250	224	202	236	225	233	251	286	209	216	226	204	213	178	280	235	166	200	226	103	175	120	272	300	185	235	132	171	148	257	218	228
ID1504	LINE/L1	L1-3_BT	ACCATATGACCCAGCAATCCCACTCCTAGGCATATACCCTGA	308	239	247	261	264	251	309	315	235	228	253	233	241	204	300	260	181	218	257	116	189	134	296	348	217	259	147	183	163	302	236	264
ID1505	LINE/L1	L1-3_BT	ACCATATGTAAAATAGATAGCCAATGGGAATTTGCTGTATGG	185	106	135	78	146	145	157	91	84	111	140	90	143	100	168	136	119	130	132	74	79	55	81	199	121	122	106	116	127	175	90	158
ID1506	LINE/L1	L1-3_BT	ACCCAAGCAGCTGCACCACCTCCACACCTGGCCCTCACAGGG	95	61	63	77	84	67	74	69	61	82	84	65	79	0	67	76	67	55	85	41	62	47	53	85	61	67	49	53	54	82	28	68
ID1507	LINE/L1	L1-3_BT	ACCCACATGCAGAGGTGGAAATAAAACCACAATTGAAACCCA	74	65	71	45	65	60	56	67	34	39	52	52	60	45	88	62	40	56	54	28	45	30	56	69	48	59	36	38	52	65	41	53
ID1508	LINE/L1	L1-3_BT	ACCCAGCAATCCCACTCCTAGGCATATACCCTGAGGAAACCA	334	251	221	263	265	236	320	310	243	200	247	256	261	196	319	252	174	227	260	119	178	145	349	359	244	257	157	181	164	312	242	290
ID1509	LINE/L1	L1-3_BT	ACCCCTCTAGGTTGATACAGAGCCCCTGTTTGAGTTTCCTGA	0	295	343	0	0	0	375	0	261	315	0	354	0	306	473	336	277	299	332	167	304	218	285	526	284	326	263	250	301	422	300	405
ID1510	LINE/L1	L1-3_BT	ACCCTCTCCTCCCCTCTCCCCATGTCCATAAGTCTATTCTCT	240	160	206	249	176	215	239	265	212	198	205	153	208	153	226	183	147	198	204	101	162	91	302	306	144	183	162	130	167	254	239	228
ID1511	LINE/L1	L1-3_BT	ACCTAAACAGACATTTCTCCAAAGAAGACATACAGATGGCTA	0	325	347	388	352	392	450	386	394	340	337	352	356	371	399	386	281	392	388	199	321	218	419	506	310	371	254	288	248	429	298	351
ID1512	LINE/L1	L1-3_BT	ACCTAGAGGGGTGGGATGGGGAGGGAGATGGGAGGGAGGTTC	131	90	125	186	139	111	158	205	153	93	124	156	93	107	183	130	89	111	118	65	95	56	209	224	127	122	74	87	109	147	187	135
ID1513	LINE/L1	L1-3_BT	ACCTATGGCTGATTCATGTTGAGGTTTGACAGAAAACAACAA	463	263	294	307	339	333	453	320	259	299	339	314	343	289	481	328	237	297	341	179	270	202	361	522	357	312	220	237	311	433	343	463
ID1514	LINE/L1	L1-3_BT	ACCTATTATACAGAGTGAAGTGAGTCAGAAAGAGAAAGATAA	0	177	204	0	0	0	247	0	213	200	0	169	0	180	231	224	134	191	204	109	166	118	258	257	171	207	154	155	162	243	182	231
ID1515	LINE/L1	L1-3_BT	ACCTCAACATGAATCAGCCATAGGTATACATATATCCCCTCC	363	224	244	237	270	265	335	238	209	249	280	249	283	216	456	275	179	254	264	142	215	148	241	448	294	266	184	186	276	343	230	338
ID1516	LINE/L1	L1-3_BT	ACCTCAATACATAAGACAAACACTAACAGACATAAAAGGAGA	215	137	164	176	183	170	195	176	73	185	190	163	191	169	176	182	126	148	197	85	154	117	200	225	135	157	122	127	112	197	106	162
ID1517	LINE/L1	L1-3_BT	ACCTCCCTCCCATCTCCCTCCCCATCCCACCCCTCTAGGTTG	132	93	117	182	135	114	154	197	154	97	129	161	92	111	186	126	93	115	130	66	96	56	214	226	131	122	74	84	105	148	175	126
ID1518	LINE/L1	L1-3_BT	ACCTGAAAAAGAATTCAGAATAATGATAGTAAAGATGATCAA	0	111	118	141	134	151	171	156	110	135	150	134	142	100	172	141	88	122	135	61	116	83	132	189	113	124	107	97	117	157	92	176
ID1519	LINE/L1	L1-3_BT	ACCTTCTTCTCAAGTGCACATGGAACATTCTCCAGGATAGAC	172	101	117	123	110	111	160	121	114	102	131	120	114	89	141	128	71	112	119	52	98	64	153	193	94	111	77	89	73	165	78	137
ID1520	LINE/L1	L1-3_BT	ACCTTGAAAACAAAATGGAGAAAATGCAAGAATCAATTAACA	201	117	124	113	127	127	161	141	113	126	144	133	132	0	148	136	85	135	129	81	107	70	136	158	104	139	94	100	110	151	94	144
ID1521	LINE/L1	L1-3_BT	ACTACAATATTGTAAAGTAATTAGCCTCCAATTAAAATAAAT	887	556	609	615	630	671	805	731	571	621	622	618	664	489	1070	591	424	618	628	287	513	351	800	1158	594	585	451	419	526	823	623	790
ID1522	LINE/L1	L1-3_BT	ACTACATAATGATCAAGGGATCAATCCAAGAGGAAGACATAA	0	124	144	0	0	0	179	0	127	130	0	133	0	89	149	145	80	150	142	66	131	60	187	189	104	141	87	84	94	184	83	170
ID1523	LINE/L1	L1-3_BT	ACTAGAAACACAGAAGTCCAAATAAATGAAGAGGAAATAGGC	0	113	126	0	0	0	161	0	121	115	0	110	0	88	152	131	63	137	116	65	109	75	98	128	99	117	98	77	105	152	92	150
ID1524	LINE/L1	L1-3_BT	ACTATTTACAATAGCTAGAACATGGAAGCAACCTAGATGTCC	437	267	327	329	319	343	451	365	348	316	356	303	317	319	378	314	273	333	347	144	273	234	424	471	265	280	293	309	256	440	303	391
ID1525	LINE/L1	L1-3_BT	ACTCAAACAGGGGCTCTGTATCAACCTAGAGGGGTGGGATGG	345	227	288	170	254	282	289	191	212	232	237	332	269	217	417	247	190	230	268	136	237	140	239	445	230	258	222	198	251	361	235	318
ID1526	LINE/L1	L1-3_BT	ACTCACACCAATGGACAGATCATCAAAACAGAAAATTAATAA	213	130	168	162	140	154	191	184	139	143	156	156	165	127	189	173	119	158	168	84	113	109	208	221	130	153	100	147	115	219	105	167
ID1527	LINE/L1	L1-3_BT	ACTCACTTCACTCTGTATAATAGGTTCTAGGTTCATCCACCT	239	163	162	164	179	163	224	204	188	164	191	182	189	180	209	200	125	160	167	95	149	99	225	194	152	177	130	135	143	230	170	211
ID1528	LINE/L1	L1-3_BT	ACTCTCAGCCTTAAATGTTTCTCCTCTGACTCAGACAATTGC	115	70	79	79	80	73	104	82	72	96	83	65	78	70	109	44	61	74	90	38	72	58	96	96	55	67	64	74	66	102	79	97
ID1529	LINE/L1	L1-3_BT	ACTCTTTCCATACATCTCACCCTCTCCTCCCCTCTCCCCATG	248	185	208	214	203	225	244	256	232	214	226	175	221	165	276	207	135	177	205	105	157	31	335	352	177	204	158	147	179	243	233	235
ID1530	LINE/L1	L1-3_BT	ACTGAAAGTGAGAGGATGGAAAAATATATTCCATGCAAATGG	0	147	155	0	0	171	202	0	157	159	180	147	0	126	177	187	106	165	191	75	131	88	191	206	119	158	107	247	125	193	89	173
ID1531	LINE/L1	L1-3_BT	ACTGAGGTTTGATTTGTGACCCAAGATGTGGTCTATCCTGGA	171	109	135	167	131	141	174	165	132	136	144	145	137	111	175	135	86	115	160	66	144	68	206	213	101	137	95	106	100	185	88	148
ID1532	LINE/L1	L1-3_BT	ACTGGACAGCTACATGTAAAAGAATGAAATTAGAACACTTCC	303	214	251	225	277	266	289	245	226	238	246	215	235	188	255	238	187	234	260	118	204	135	271	325	213	208	165	184	155	312	168	248
ID1533	LINE/L1	L1-3_BT	ACTGTCTGATTCTCATTCCATTTAGGCTGCCACAGATCAGCT	0	112	119	0	0	134	129	0	106	116	105	110	0	101	137	133	92	122	106	55	90	80	159	129	82	115	91	87	124	130	115	123
ID1534	LINE/L1	L1-3_BT	ACTTATGGACATGGGGAGAGGGGAGGAGAGGGTGAGATGTAT	306	212	230	259	220	268	273	285	244	237	254	192	263	178	278	233	144	217	222	136	172	84	347	350	160	242	176	144	201	294	249	266
ID1535	LINE/L1	L1-3_BT	ACTTTACAATATTGTAGTGGTTTTTGCCATACATTGACATGA	522	301	335	4048	368	393	504	4414	3242	374	415	473	386	295	2969	370	288	356	380	171	323	197	5547	3346	317	337	228	286	324	512	3886	477
ID1536	LINE/L1	L1-3_BT	ACTTTACAATATTGTATTGGTTTTGCCATACATCAACATGAA	3261	2636	3212	0	3287	3360	3207	0	1	3075	3183	9	2924	2872	0	3400	2343	2492	3503	1663	2804	1911	0	4	1	3317	2102	2645	3044	3270	0	2980
ID1537	LINE/L1	L1-3_BT	ACTTTATTCTGCTCTTCAGAAGTTATTTCCACCATTTTATCT	236	150	180	157	185	190	182	188	181	178	167	190	190	138	193	185	113	160	193	92	155	100	201	228	135	154	121	144	147	215	123	176
ID1538	LINE/L1	L1-3_BT	ACTTTGCTAAATTCACTGATTAGCTCTAGTAATTTTCTGATA	0	210	243	273	236	273	296	279	253	217	281	268	277	219	277	242	206	249	249	124	249	148	318	345	172	257	187	225	167	320	182	262
ID1539	LINE/L1	L1-3_BT	AGAAAACAACAAAATTCTGTAAAGCAATTATCCTTCAATAAA	0	224	240	265	248	290	359	300	229	250	289	266	300	212	445	247	211	283	297	112	237	159	315	392	254	236	213	195	263	372	272	354
ID1540	LINE/L1	L1-3_BT	AGAAAACAACAAAATTCTGTAAAGCAATTATCCTTCAATTAA	0	314	294	0	0	343	411	0	281	329	334	335	0	257	432	316	259	324	330	148	288	217	354	405	297	324	263	254	294	401	321	398
ID1541	LINE/L1	L1-3_BT	AGAAAACAGCAAAATTCTGTAAAGCAATTATCCTTCAATAAA	270	187	197	242	223	218	248	273	203	212	220	243	241	185	301	206	174	202	207	97	191	135	267	331	185	196	174	160	203	264	228	268
ID1542	LINE/L1	L1-3_BT	AGAAAATGCAAGAATCAATTAACAAAGACCTAGAAGAATTAA	0	146	166	0	0	0	200	0	149	156	0	157	0	124	193	183	97	146	167	97	143	115	193	207	152	162	113	135	138	176	127	182
ID1543	LINE/L1	L1-3_BT	AGAAAATTAATAAGGAAACACAAGTCTTAAATGATACATTAG	0	130	161	156	162	155	169	194	134	159	154	173	172	157	233	173	97	152	153	85	139	85	208	210	137	157	119	112	105	199	110	170
ID1544	LINE/L1	L1-3_BT	AGAAACACAGAAGTCCAAATAAATGAAGAGGAAATAGGCAAA	202	127	154	158	160	149	184	169	139	136	156	132	139	112	181	145	84	151	147	78	129	88	123	166	122	135	121	92	129	184	113	166
ID1545	LINE/L1	L1-3_BT	AGAAACAGACATAGAGAATAGACTTATGGACATGGGGAGAGG	0	199	212	0	0	0	265	0	225	224	0	121	0	151	269	200	179	197	235	103	192	109	304	325	168	208	163	165	170	273	232	241
ID1546	LINE/L1	L1-3_BT	AGAAACATTTAAGGCTGAGAGTGAAACAGCTGATCTGTGGCA	151	102	99	107	108	90	134	117	94	119	91	123	97	91	140	52	94	113	109	45	100	73	137	127	57	102	83	86	98	120	105	137
ID1547	LINE/L1	L1-3_BT	AGAAACCAACACAACATTGTAAAGCAATTATCCTCCAATTAA	180	106	125	92	144	159	179	97	103	133	148	121	146	107	203	130	100	108	156	57	125	85	139	199	68	65	100	97	124	189	74	172
ID1548	LINE/L1	L1-3_BT	AGAACCTATTATACAGAGTGAAGTGAGTCAGAAAGAGAAAGA	0	204	223	226	222	221	245	261	218	211	224	172	213	195	243	244	140	197	215	109	178	128	256	255	173	234	172	160	181	257	189	233
ID1549	LINE/L1	L1-3_BT	AGAACTGACTCAAATGTGTTCCTTTTTATGGCTGAGTAATAT	0	127	139	153	129	132	170	162	159	203	148	148	163	130	200	137	110	152	167	70	134	103	177	256	143	146	113	129	122	186	147	161
ID1550	LINE/L1	L1-3_BT	AGAAGAATACACCTTCTTCTCAAGTGCACATGGAACATTCTC	0	115	125	0	0	111	157	0	124	109	124	120	106	86	140	142	74	117	123	51	90	64	155	187	102	117	75	79	71	149	78	127
ID1551	LINE/L1	L1-3_BT	AGAAGACATACAGATGGCTAACAAACACATGAAAAGATGCTC	7220	1637	1779	7535	1339	2145	8565	9535	2855	2869	1838	1882	1497	0	3812	3640	1659	5275	2075	1497	1875	1288	8473	5200	875	3105	953	2589	949	8613	1310	5570
ID1552	LINE/L1	L1-3_BT	AGAATACACCTTCTTCTCAAGTGCACATGGAACATTCTCCAG	164	121	135	133	122	113	168	147	123	121	142	133	130	90	150	152	75	120	131	63	96	73	158	199	102	128	82	92	85	146	77	140
ID1553	LINE/L1	L1-3_BT	AGAATAGACTTATGGACATGGGGAGAGGGGAGGAGAGGGTGA	261	168	214	254	187	219	253	278	228	216	210	180	219	163	237	196	146	207	197	101	177	99	330	309	152	192	163	134	173	266	250	240
ID1554	LINE/L1	L1-3_BT	AGAATCAATTAACAAAGACCTAGAAGAATTAAAGAATAAACA	182	135	151	130	142	142	165	157	144	136	135	143	152	101	178	166	80	147	159	97	128	93	166	173	133	149	106	104	111	171	106	156
ID1555	LINE/L1	L1-3_BT	AGAATGAAATTAGAACACTTCCTAACACCATACACAAAGATA	325	259	270	301	277	262	344	334	254	253	291	237	278	218	322	262	208	252	279	141	257	155	362	397	236	289	186	210	174	325	224	272
ID1556	LINE/L1	L1-3_BT	AGAATGGCCATCATCAAAAAGTCTACAAACAATAAATGCTGG	372	255	285	321	270	245	331	344	290	308	292	269	309	249	366	302	242	280	325	147	253	179	405	453	227	280	220	239	216	352	295	307
ID1557	LINE/L1	L1-3_BT	AGAATGTTCCATGTGCACTTGAGAAGAAGGTGTATTCTTCTG	148	107	121	138	113	112	155	148	122	106	122	116	105	84	138	137	75	120	122	49	85	61	159	191	98	115	74	81	75	148	77	124
ID1558	LINE/L1	L1-3_BT	AGAATTCAGAATAATGATAGTAAAGATGATCAAAAACCTTGA	202	123	134	128	147	151	172	154	120	138	150	135	139	122	171	156	93	124	146	67	125	79	136	186	120	140	103	115	118	180	103	169
ID1559	LINE/L1	L1-3_BT	AGAATTCAGTACCACCAAACCAGCTTTACAACAAATGTTAAA	230	154	173	141	178	194	192	163	150	152	180	145	201	177	200	203	134	195	173	93	156	114	199	248	142	184	129	158	139	188	114	178
ID1560	LINE/L1	L1-3_BT	AGAATTTATTTACAGGGCAGCAATGGAGAAACAGACATAGAG	148	94	101	127	100	124	149	153	128	125	125	87	138	99	148	103	106	116	137	53	112	72	172	206	86	99	73	88	83	155	126	132
ID1561	LINE/L1	L1-3_BT	AGAATTTTGCTGTTTTCTGTCAAACCTCAACATGAATCAGCC	0	223	220	253	239	217	274	258	222	238	241	240	240	207	314	239	193	219	284	123	199	131	283	334	168	243	187	217	230	272	241	275
ID1562	LINE/L1	L1-3_BT	AGAATTTTGTTGTTTTCTGTCAAACCTCAACATGAATCAGCC	568	378	388	410	447	424	549	409	344	416	453	415	447	377	600	423	313	395	466	220	364	262	476	619	408	415	294	319	416	531	431	546
ID1563	LINE/L1	L1-3_BT	AGACAACCCTCAGAATGGGAGAAAATAATAGCAAATGAAACA	327	237	260	300	249	256	334	334	228	233	275	303	254	217	318	246	205	245	256	141	219	142	367	388	220	265	187	195	166	353	247	280
ID1564	LINE/L1	L1-3_BT	AGACATACAGATGGCTAACAAACACATGAAAAGATGCTCAAC	7151	1607	1758	6403	1329	2116	9149	9208	3112	2827	1804	1778	1495	2347	3881	3567	1600	5155	2013	1474	1839	1259	8393	5118	854	3049	911	2553	968	8202	3385	5635
ID1565	LINE/L1	L1-3_BT	AGACATAGAGAATAGACTTATGGACATGGGGAGAGGGGAGGA	218	166	183	247	166	206	233	266	211	187	201	131	206	119	241	166	134	182	212	84	134	83	277	272	131	184	140	125	153	255	231	232
ID1566	LINE/L1	L1-3_BT	AGACATTTCTCCAAAGAAGACATACAGATGGCTAACAAACAC	0	1568	1747	0	0	2138	8444	0	2838	2801	1824	3160	0	2173	3620	3561	1436	5083	2039	1490	1815	1112	8796	4838	881	3025	981	2059	884	8460	1283	5730
ID1567	LINE/L1	L1-3_BT	AGACCACATCTTGGGTCACAAATCAAACCTCAGTAAATTTAA	205	135	173	183	162	184	191	186	153	164	192	172	173	162	204	173	126	140	199	93	164	88	206	247	122	171	143	143	129	213	109	177
ID1568	LINE/L1	L1-3_BT	AGACCTAAACAGACATTTCTCCAAAGAAGACATACAGATGGC	505	352	356	409	356	410	457	393	400	360	364	349	365	375	439	405	284	403	398	204	331	238	437	548	320	390	275	304	267	454	315	369
ID1569	LINE/L1	L1-3_BT	AGACTGAAAGTGAGAGGATGGAAAAATATATTCCATGCAAAT	226	155	165	153	178	178	218	192	169	177	189	154	192	142	192	192	114	184	205	82	147	94	213	217	141	175	119	254	131	206	92	190
ID1570	LINE/L1	L1-3_BT	AGAGAATTCAGTACCACCAAACCAGCTTTACAACAAATGTTA	216	140	166	140	168	174	182	162	141	147	165	140	181	163	196	194	114	186	161	77	148	104	191	239	134	170	120	147	127	174	105	169
ID1571	LINE/L1	L1-3_BT	AGAGCCCCTGTTTGAGTTTCCTGAGCCATACAGCAAATTCCC	348	277	260	152	297	287	313	149	171	251	292	266	293	233	340	291	206	216	265	140	223	167	168	436	227	281	222	190	248	337	160	338
ID1572	LINE/L1	L1-3_BT	AGAGGAGAAACATTTAAGGCTGAGAGTGAAACAGCTGATCTG	143	109	109	108	112	89	134	123	92	132	105	128	94	92	138	51	96	111	114	51	100	79	131	129	64	106	87	89	99	121	103	136
ID1573	LINE/L1	L1-3_BT	AGAGGATGGAAAAATATATTCCATGCAAATGGGAAGCAAAAG	194	124	142	147	142	151	182	169	143	160	164	129	150	128	182	163	98	157	184	70	125	84	184	219	131	135	114	236	109	187	88	158
ID1574	LINE/L1	L1-3_BT	AGAGGGGAGGAGAGGGTGAGATGTATGGAAAGAGTAACATGG	276	226	267	233	232	265	285	289	248	247	270	237	264	212	343	254	177	213	234	131	216	41	343	411	190	254	204	186	235	295	241	263
ID1575	LINE/L1	L1-3_BT	AGAGGGTGAGATGTATGGAAAGAGTAACATGGAAACTTACAT	341	277	309	290	307	300	364	297	289	289	288	273	320	238	446	311	204	305	301	168	255	44	403	465	248	304	240	211	267	367	263	334
ID1576	LINE/L1	L1-3_BT	AGAGTAACATGGAAACTTACATTACCATATGTAAAATAGATA	473	289	290	237	295	325	454	287	224	308	368	219	332	255	496	323	246	308	337	180	277	104	300	505	297	315	250	259	310	481	191	416
ID1577	LINE/L1	L1-3_BT	AGAGTGAAACAGCTGATCTGTGGCAGCCTAAATGGAATGAGA	147	97	114	115	112	104	119	125	97	96	97	107	109	85	137	114	94	113	94	49	90	73	132	127	80	98	73	84	100	115	105	124
ID1578	LINE/L1	L1-3_BT	AGATAGCCAATGGGAATTTGCTGTATGGCTCAGGAAACTCAA	213	162	186	98	200	169	213	109	129	164	189	133	170	143	201	200	155	138	176	110	131	81	94	274	138	185	135	141	151	213	122	191
ID1579	LINE/L1	L1-3_BT	AGATATCAATGAGATCCATCTCATCTAATGTATCATTTAAGA	179	123	147	141	152	161	164	166	119	128	137	121	149	108	175	163	93	129	152	82	115	86	177	172	106	143	100	104	116	176	91	169
ID1580	LINE/L1	L1-3_BT	AGATCAGCTGTTTCACTCTCAGCCTTAAATGTTTCTCCTCTG	0	106	115	105	112	94	136	123	94	135	105	131	100	95	136	52	102	107	121	51	95	84	128	138	67	102	83	88	102	127	99	139
ID1581	LINE/L1	L1-3_BT	AGATCATCAAAACAGAAAATTAATAAGGAAACACAAGTCTTA	239	155	182	167	174	168	205	202	166	167	185	173	177	159	221	191	116	179	177	96	150	103	213	218	145	192	136	143	120	215	116	188
ID1582	LINE/L1	L1-3_BT	AGATCCATCTCATCTAATGTATCATTTAAGACTTGTGTTTCC	183	146	153	147	165	157	165	152	113	148	145	135	150	0	185	176	104	133	160	84	131	83	186	185	116	171	98	114	109	158	89	149
ID1583	LINE/L1	L1-3_BT	AGATGAATGGATAAAGAAGTTGTGGTACATATACACAATGGA	0	168	143	244	0	185	269	0	210	228	227	206	222	204	260	245	168	182	268	98	202	119	280	304	189	166	161	182	129	265	219	228
ID1584	LINE/L1	L1-3_BT	AGATGATCAAAAACCTTGAAAACAAAATGGAGAAAATGCAAG	182	106	134	98	116	125	157	125	100	107	120	127	123	107	154	136	81	130	119	74	98	65	130	158	104	125	88	88	102	150	83	142
ID1585	LINE/L1	L1-3_BT	AGATGGGAGGGAGGTTCAAAAGGGAGGGGATATATGTATACC	206	134	136	144	158	158	187	163	94	142	170	139	148	116	233	151	106	144	133	76	107	75	145	210	124	132	90	119	119	204	131	188
ID1586	LINE/L1	L1-3_BT	AGATGTATGGAAAGAGTAACATGGAAACTTACATTACCATAT	350	251	270	181	273	269	360	203	183	268	274	195	280	213	392	262	179	273	290	152	242	41	248	407	221	276	188	191	227	367	157	329
ID1587	LINE/L1	L1-3_BT	AGATGTGGTCTATCCTGGAGAATGTTCCATGTGCACTTGAGA	213	134	140	173	157	137	205	169	155	129	179	127	151	119	180	158	92	139	158	71	142	85	205	205	107	144	108	117	107	203	113	178
ID1588	LINE/L1	L1-3_BT	AGATTCCTTAAAAAACTAGGAATAAAACCACCATATGACCCA	231	172	180	217	196	189	234	245	178	175	210	190	176	158	272	204	130	201	179	107	149	102	257	337	184	177	142	123	114	243	180	217
ID1589	LINE/L1	L1-3_BT	AGCAAATGAAACAACTGACAAAGGATTAATTTCCAAAATATA	0	326	386	400	367	381	471	439	380	369	386	383	396	335	397	376	334	347	398	189	322	245	427	524	314	378	290	306	244	473	283	394
ID1590	LINE/L1	L1-3_BT	AGCAAATTCCCATTGGCTATCTATTTTACATATGGTAATGTA	267	166	181	97	208	182	220	115	121	153	201	129	197	136	230	189	118	171	167	88	112	82	129	270	158	179	126	138	162	234	96	222
ID1591	LINE/L1	L1-3_BT	AGCAAGGTGAAAAGACAACCCTCAGAATGGGAGAAAATAATA	0	210	255	0	0	0	308	0	192	0	0	254	0	209	238	248	0	220	241	149	197	126	281	359	179	241	152	206	165	289	201	257
ID1592	LINE/L1	L1-3_BT	AGCAATCCCACTCCTAGGCATATACCCTGAGGAAACCAAAAT	289	205	177	213	214	186	283	250	199	176	191	230	199	149	261	204	136	214	220	109	151	107	292	290	187	214	128	143	139	257	207	251
ID1593	LINE/L1	L1-3_BT	AGCACCTCAATACATAAGACAAACACTAACAGACATAAAAGG	0	129	154	0	0	0	181	0	75	173	167	138	0	0	154	161	109	138	181	76	137	107	172	208	121	154	98	112	99	186	92	150
ID1594	LINE/L1	L1-3_BT	AGCACTATTTACAATAGCTAGAACATGGAAGCAACCTAGATG	455	296	350	375	347	383	502	416	395	367	401	326	363	357	422	331	304	366	388	161	307	252	457	504	294	308	301	327	270	467	337	428
ID1595	LINE/L1	L1-3_BT	AGCAGCTGCACCACCTCCACACCTGGCCCTCACAGGGGCAAA	97	67	65	62	89	70	82	63	52	81	78	58	83	72	79	78	64	61	87	39	68	41	54	87	60	67	52	51	56	77	27	73
ID1596	LINE/L1	L1-3_BT	AGCATTTATTGTTTGTAGACTTTTTGATGATGGCCATTCTGA	377	271	295	337	283	259	338	365	315	324	291	281	316	275	377	312	254	291	342	152	261	195	416	462	242	287	243	261	219	358	314	316
ID1597	LINE/L1	L1-3_BT	AGCCAATGGGAATTTGCTGTATGGCTCAGGAAACTCAAACAG	216	173	185	97	200	173	219	114	143	175	192	161	171	0	211	200	156	136	184	108	141	97	104	276	146	181	149	146	172	220	124	210
ID1598	LINE/L1	L1-3_BT	AGCCACACTGCCCCTGGGTTTCAATTGTGGTTTTATTTCCAC	86	64	78	58	69	68	69	58	36	54	66	56	67	52	97	70	41	60	58	32	39	32	58	82	46	65	37	44	56	77	36	70
ID1599	LINE/L1	L1-3_BT	AGCCATACAGCAAATTCCCATTGGCTATCTATTTTACATATG	0	111	141	80	162	150	167	96	93	118	154	97	156	103	174	150	133	132	140	73	71	63	77	215	127	133	114	122	130	182	88	158
ID1600	LINE/L1	L1-3_BT	AGCCATAGGTATACATATATCCCCTCCCTTTTGAACCTCCCT	229	149	157	149	172	164	226	154	87	155	176	154	178	114	259	173	132	156	161	94	133	73	135	283	166	165	118	131	149	230	135	229
ID1601	LINE/L1	L1-3_BT	AGCCCCTGTTTGAGTTTCCTGAGCCATACAGCAAATTCCCAT	196	182	164	77	194	176	187	90	106	160	181	148	174	125	192	191	134	127	171	95	136	97	95	264	130	181	146	121	157	203	91	190
ID1602	LINE/L1	L1-3_BT	AGCTAATCAGTGAATTTAGCAAAGTTGCAGGATACAAAATCA	267	142	191	222	180	209	241	225	200	188	183	209	222	187	229	198	154	177	201	86	155	109	254	304	162	182	134	170	129	241	151	209
ID1603	LINE/L1	L1-3_BT	AGCTGGAAGATAAAATGGTGGAAATAACTTCTGAAGAGCAGA	223	150	172	167	180	173	172	169	176	162	161	170	175	136	184	178	96	132	172	85	128	100	198	231	134	157	125	138	146	198	114	167
ID1604	LINE/L1	L1-3_BT	AGCTGGTGTTCTGCATGCACTTCTGTGTCTGAAGGTGTATTC	134	102	101	80	95	72	107	103	70	92	120	110	109	82	132	97	78	97	109	42	101	81	94	140	80	103	83	76	104	119	73	110
ID1605	LINE/L1	L1-3_BT	AGCTGTTTCACTCTCAGCCTTAAATGTTTCTCCTCTGACTCA	154	111	127	112	119	99	149	127	112	147	114	137	116	107	147	62	117	115	138	57	110	92	128	155	86	115	92	103	112	135	111	149
ID1606	LINE/L1	L1-3_BT	AGCTTTTCAGACAAGCAAAAGTTAAGAGAATTCAGTACCACC	0	113	123	117	126	149	172	139	133	127	153	119	150	111	148	149	96	138	149	67	121	75	174	195	105	143	106	105	95	172	87	164
ID1607	LINE/L1	L1-3_BT	AGGAAACACAAGTCTTAAATGATACATTAGATGAGATGGATC	183	146	151	142	163	157	164	149	105	149	144	137	150	0	186	175	105	127	158	84	129	81	172	185	116	169	96	117	107	155	92	150
ID1608	LINE/L1	L1-3_BT	AGGAAACTCAAACAGGGGCTCTGTATCAACCTAGAGGGGTGG	0	265	313	188	292	301	345	186	255	280	307	343	304	278	465	303	236	283	307	150	273	190	282	483	256	297	256	230	274	393	292	363
ID1609	LINE/L1	L1-3_BT	AGGAACAAACTAGAAACACAGAAGTCCAAATAAATGAAGAGG	0	124	136	144	152	137	179	155	134	132	135	124	121	98	159	149	81	140	121	69	99	76	145	159	105	127	113	94	103	175	106	159
ID1610	LINE/L1	L1-3_BT	AGGAATAAAACCACCATATGACCCAGCAATCCCACTCCTAGG	0	246	247	309	240	263	299	0	258	252	272	241	223	228	307	269	208	224	259	121	197	156	347	362	223	257	154	204	170	312	237	281
ID1611	LINE/L1	L1-3_BT	AGGAATACACCTTCAGACACAGAAGTGCATGCAGAACACCAG	135	105	104	90	103	80	103	116	68	95	120	111	106	79	130	99	81	96	106	42	101	79	96	136	81	106	92	80	105	123	73	107
ID1612	LINE/L1	L1-3_BT	AGGAGAAACATTTAAGGCTGAGAGTGAAACAGCTGATCTGTG	140	105	109	111	108	91	132	120	92	126	104	126	94	90	139	50	101	116	109	48	102	73	131	124	62	106	88	92	102	120	105	140
ID1613	LINE/L1	L1-3_BT	AGGAGAGGGTGAGATGTATGGAAAGAGTAACATGGAAACTTA	362	297	328	292	312	317	359	307	292	314	321	284	331	289	430	329	229	308	316	184	274	47	392	499	266	320	256	246	279	384	260	324
ID1614	LINE/L1	L1-3_BT	AGGAGCACCTCAATACATAAGACAAACACTAACAGACATAAA	201	115	150	144	143	152	174	154	105	157	164	127	145	141	164	156	100	132	170	79	120	105	165	204	124	140	94	106	94	180	93	134
ID1615	LINE/L1	L1-3_BT	AGGATAATTGCTTTACAGAATTTTGTTGTTTTCTGTCAAACC	583	397	408	462	449	463	577	470	401	418	463	437	479	397	689	436	365	436	449	213	362	260	518	629	399	422	326	344	424	544	441	549
ID1616	LINE/L1	L1-3_BT	AGGATACAAAATCAATACACAGAAATCACTTGCATTTCTATA	304	171	209	249	205	249	271	267	222	209	215	237	207	191	245	227	153	224	235	104	172	129	257	311	202	210	170	170	127	280	154	240
ID1617	LINE/L1	L1-3_BT	AGGATAGACCACATCTTGGGTCACAAATCAAACCTCAGTAAA	181	117	143	175	129	148	178	173	133	153	150	156	150	134	183	153	97	131	178	72	149	73	206	227	108	146	102	117	111	194	97	155
ID1618	LINE/L1	L1-3_BT	AGGATGGAAAAATATATTCCATGCAAATGGGAAGCAAAAGAA	199	136	154	140	153	152	187	175	151	169	159	137	163	127	186	172	100	154	188	76	134	83	187	229	135	140	116	238	119	186	96	161
ID1619	LINE/L1	L1-3_BT	AGGCAAGAACACACAGGAGTAGGACCAGATTAGAATCTGAGC	89	64	63	31	51	55	80	43	38	62	52	65	59	35	86	55	39	54	61	24	53	38	55	94	44	51	52	28	49	90	32	68
ID1620	LINE/L1	L1-3_BT	AGGCTAATTACTTTACAATATTGTAGTGGTTTTTGCCATACA	0	391	432	4370	458	473	621	4653	3624	451	500	519	463	343	1103	447	330	443	469	212	370	252	5983	1175	440	412	297	324	417	646	4237	607
ID1621	LINE/L1	L1-3_BT	AGGCTGAGAGTGAAACAGCTGATCTGTGGCAGCCTAAATGGA	137	94	107	119	103	96	125	126	88	102	96	98	93	79	128	109	80	98	104	53	99	78	141	112	85	97	77	77	93	115	104	124
ID1622	LINE/L1	L1-3_BT	AGGGAGATGGGAGGGAGGTTCAAAAGGGAGGGGATATATGTA	157	111	105	138	134	122	149	156	84	92	125	143	133	98	195	138	89	116	108	61	97	72	146	172	99	115	80	95	91	159	124	137
ID1623	LINE/L1	L1-3_BT	AGGGAGGGGATATATGTATACCTATGGCTGATTCATGTTGAG	348	229	233	209	271	276	328	218	184	251	262	236	291	211	452	278	193	253	254	148	221	144	229	448	284	266	175	190	266	334	213	326
ID1624	LINE/L1	L1-3_BT	AGGGAGTATCAAATAGTGAGAACTCACACAAAGGAAACCACT	131	63	64	87	69	76	102	99	93	64	85	82	84	52	140	76	67	86	88	47	69	50	100	125	83	64	71	74	61	111	47	97
ID1625	LINE/L1	L1-3_BT	AGGGCAGCAATGGAGAAACAGACATAGAGAATAGACTTATGG	143	105	118	142	113	133	152	167	127	123	123	83	116	83	198	124	97	124	142	63	107	71	171	205	94	115	75	99	84	163	137	136
ID1626	LINE/L1	L1-3_BT	AGGGGAGGAGAGGGTGAGATGTATGGAAAGAGTAACATGGAA	289	243	279	255	259	274	303	305	269	278	290	245	284	229	366	275	190	238	255	149	233	42	357	430	218	265	218	200	249	314	256	280
ID1627	LINE/L1	L1-3_BT	AGGGGCTCTGTATCAACCTAGAGGGGTGGGATGGGGAGGGAG	222	148	190	159	181	192	176	165	200	154	164	227	186	153	317	186	132	180	197	101	165	96	211	333	180	175	160	125	178	242	197	198
ID1628	LINE/L1	L1-3_BT	AGGGTGAGATGTATGGAAAGAGTAACATGGAAACTTACATTA	0	264	293	255	296	295	364	266	260	272	276	232	312	242	425	297	190	280	294	158	255	36	357	456	238	282	225	193	249	360	229	326
ID1629	LINE/L1	L1-3_BT	AGGTATACATATATCCCCTCCCTTTTGAACCTCCCTCCCATC	205	131	135	145	145	156	190	154	90	143	172	138	148	0	220	153	103	147	132	77	106	76	141	206	123	135	90	120	123	202	130	192
ID1630	LINE/L1	L1-3_BT	AGGTGAAAAGACAACCCTCAGAATGGGAGAAAATAATAGCAA	338	257	292	323	322	270	363	340	252	255	281	327	280	224	320	286	239	249	279	167	238	144	366	416	224	291	194	220	205	351	246	322
ID1631	LINE/L1	L1-3_BT	AGGTTGATACAGAGCCCCTGTTTGAGTTTCCTGAGCCATACA	0	277	304	132	311	298	327	0	190	316	340	308	321	249	421	324	226	234	303	150	284	183	136	490	248	300	246	214	274	359	174	353
ID1632	LINE/L1	L1-3_BT	AGGTTTGACAGAAAACAACAAAATTCTGTAAAGCAATTATCC	585	395	406	464	445	463	575	470	387	422	460	435	486	397	696	432	367	437	449	210	371	253	515	630	399	420	319	339	425	552	439	547
ID1633	LINE/L1	L1-3_BT	AGGTTTGATTTGTGACCCAAGATGTGGTCTATCCTGGAGAAT	204	125	145	178	138	152	191	168	146	148	151	153	166	115	188	148	93	129	166	67	149	69	214	214	111	148	105	113	109	205	92	159
ID1634	LINE/L1	L1-3_BT	AGTAAAGATGATCAAAAACCTTGAAAACAAAATGGAGAAAAT	198	112	150	114	136	134	176	134	129	104	128	151	123	0	180	141	85	145	129	71	118	72	138	178	113	131	98	95	113	167	85	155
ID1635	LINE/L1	L1-3_BT	AGTAACATGGAAACTTACATTACCATATGTAAAATAGATAGC	447	270	281	231	293	311	422	271	219	310	345	210	306	236	466	300	227	286	317	169	255	108	304	497	284	293	230	244	301	452	183	394
ID1636	LINE/L1	L1-3_BT	AGTAATATTCCATTGTGTATATGTACCACAACTTCTTTATCC	0	155	116	246	207	154	247	269	192	192	197	152	210	176	271	191	157	142	209	85	193	117	264	298	187	152	134	168	129	253	211	208
ID1637	LINE/L1	L1-3_BT	AGTCAGAGGAGAAACATTTAAGGCTGAGAGTGAAACAGCTGA	149	110	124	110	114	92	141	120	105	140	107	129	109	0	140	53	112	107	125	52	97	78	127	144	82	111	92	94	111	132	101	149
ID1638	LINE/L1	L1-3_BT	AGTCAGTTCTAATGAGGTGGATGAACCTAGAACCTATTATAC	182	150	141	155	162	108	177	176	138	160	154	127	140	145	187	177	129	147	170	76	133	84	205	198	151	171	96	121	118	175	152	166
ID1639	LINE/L1	L1-3_BT	AGTCTACAAACAATAAATGCTGGAGAGGGTGTGGAGAAAAGG	811	492	503	834	491	568	776	739	650	573	569	563	528	501	581	604	430	584	569	304	452	279	669	860	423	577	313	558	343	785	461	554
ID1640	LINE/L1	L1-3_BT	AGTGAAACAGCTGATCTGTGGCAGCCTAAATGGAATGAGAAT	156	111	124	107	125	112	133	119	100	99	109	116	113	85	150	132	91	121	101	60	95	74	137	142	81	114	80	82	113	126	109	134
ID1641	LINE/L1	L1-3_BT	AGTGAATTTAGCAAAGTTGCAGGATACAAAATCAATACACAG	264	122	169	206	157	187	219	226	185	186	171	194	204	164	237	183	128	174	188	78	129	111	231	279	161	160	135	147	113	242	137	184
ID1642	LINE/L1	L1-3_BT	AGTGAGAGGATGGAAAAATATATTCCATGCAAATGGGAAGCA	191	129	141	137	133	149	176	158	135	150	157	129	157	0	175	165	93	142	169	67	119	79	169	203	118	137	95	229	105	173	76	146
ID1643	LINE/L1	L1-3_BT	AGTTAAGAGAATTCAGTACCACCAAACCAGCTTTACAACAAA	225	149	153	142	155	166	193	168	146	159	169	149	179	160	182	181	125	168	164	83	147	107	193	230	137	178	118	155	122	184	101	175
ID1644	LINE/L1	L1-3_BT	AGTTTCCATGTTACTCTTTCCATACATCTCACCCTCTCCTCC	312	257	283	279	265	283	327	303	284	296	294	261	304	264	377	288	203	276	280	164	258	44	369	445	252	280	221	212	255	340	259	295
ID1645	LINE/L1	L1-3_BT	ATAAAACCACAATTGAAACCCAGGGGCAGTGTGGCTAAGGAA	98	69	86	64	76	72	85	68	53	63	61	76	71	59	113	74	49	78	64	29	46	43	68	89	52	70	48	56	63	91	42	84
ID1646	LINE/L1	L1-3_BT	ATAAAACCACCATATGACCCAGCAATCCCACTCCTAGGCATA	312	257	245	308	242	272	306	339	253	255	282	232	234	235	309	272	197	241	267	122	236	147	349	363	245	272	159	201	169	306	251	285
ID1647	LINE/L1	L1-3_BT	ATAAAATGGTGGAAATAACTTCTGAAGAGCAGAATAAAGTAA	234	142	169	157	176	191	195	191	183	180	172	186	195	137	197	175	115	165	192	86	152	95	205	225	137	146	113	145	142	217	127	185
ID1648	LINE/L1	L1-3_BT	ATAACTTCTGAAGAGCAGAATAAAGTAAAAAGAATGAAAAGA	244	158	167	175	185	213	210	213	176	193	177	184	212	138	223	190	125	185	225	98	174	109	233	247	156	163	138	139	143	237	148	224
ID1649	LINE/L1	L1-3_BT	ATAATAGCAAATGAAACAACTGACAAAGGATTAATTTCCAAA	0	321	379	413	348	355	446	445	364	367	372	372	361	311	399	367	319	350	409	183	311	242	437	539	329	363	277	294	240	450	291	366
ID1650	LINE/L1	L1-3_BT	ATAATAGGTTCTAGGTTCATCCACCTCATTAGAACTGACTCA	196	164	155	169	161	117	193	192	151	170	176	140	141	158	207	183	140	159	169	82	142	82	215	215	161	186	105	134	133	180	153	181
ID1651	LINE/L1	L1-3_BT	ATAATGATAGTAAAGATGATCAAAAACCTTGAAAACAAAATG	185	104	127	95	128	120	151	119	121	99	126	118	125	103	161	129	80	124	112	64	112	61	106	155	103	127	91	89	106	156	84	148
ID1652	LINE/L1	L1-3_BT	ATAATTGCTTTACAGAATTTTGTTGTTTTCTGTCAAACCTCA	620	420	434	485	479	475	597	483	412	467	488	456	504	424	743	463	365	460	488	233	399	298	542	688	429	450	334	357	465	569	459	585
ID1653	LINE/L1	L1-3_BT	ATACACAGAAATCACTTGCATTTCTATATACTAACAATGAAA	275	159	218	226	201	231	267	273	205	203	216	209	197	181	221	234	147	194	213	102	174	112	245	278	198	209	155	160	136	263	159	238
ID1654	LINE/L1	L1-3_BT	ATACACCTTCAGACACAGAAGTGCATGCAGAACACCAGCTGA	142	106	108	77	98	70	107	96	69	108	124	115	113	78	139	103	79	99	116	45	102	89	90	145	91	108	93	75	107	130	66	109
ID1655	LINE/L1	L1-3_BT	ATACACCTTCTTCTCAAGTGCACATGGAACATTCTCCAGGAT	158	99	117	122	99	104	152	124	112	111	129	124	110	77	138	124	66	101	117	53	91	68	141	183	90	101	74	81	71	146	70	121
ID1656	LINE/L1	L1-3_BT	ATACAGAGCCCCTGTTTGAGTTTCCTGAGCCATACAGCAAAT	431	344	350	175	359	367	394	167	207	356	378	329	370	277	479	374	255	273	359	177	333	192	185	550	273	356	282	236	341	417	176	415
ID1657	LINE/L1	L1-3_BT	ATACAGCAAATTCCCATTGGCTATCTATTTTACATATGGTAA	253	163	188	90	210	194	228	102	108	162	200	133	183	139	243	205	145	183	184	107	102	80	114	283	177	175	132	151	183	244	110	224
ID1658	LINE/L1	L1-3_BT	ATACATATATCCCCTCCCTTTTGAACCTCCCTCCCATCTCCC	163	118	119	143	155	133	162	150	93	114	140	152	135	102	223	156	98	125	114	71	97	78	134	195	111	120	91	104	109	174	132	145
ID1659	LINE/L1	L1-3_BT	ATACATCAGGAATACACCTTCAGACACAGAAGTGCATGCAGA	140	105	105	94	108	97	115	104	90	101	101	106	101	67	136	104	72	93	112	43	98	67	114	140	89	102	95	68	109	133	93	125
ID1660	LINE/L1	L1-3_BT	ATACCTATGGCTGATTCATGTTGAGGTTTGACAGAAAACAAC	423	240	272	260	304	293	409	291	234	287	308	287	307	272	460	307	220	273	315	162	244	185	310	473	347	300	197	231	277	410	296	428
ID1661	LINE/L1	L1-3_BT	ATAGAAATGCAAGTGATTTCTGTGTATTGATTTTGTATCCTG	287	157	193	239	190	228	271	253	208	200	198	232	189	183	241	209	144	216	223	97	165	126	248	302	196	194	157	158	121	263	150	233
ID1662	LINE/L1	L1-3_BT	ATAGACTGAAAGTGAGAGGATGGAAAAATATATTCCATGCAA	203	138	155	141	157	170	193	175	143	167	174	140	174	138	170	171	105	161	193	76	127	81	191	196	130	158	109	240	119	187	80	165
ID1663	LINE/L1	L1-3_BT	ATAGACTTATGGACATGGGGAGAGGGGAGGAGAGGGTGAGAT	0	169	204	237	0	219	254	0	235	220	221	187	230	163	243	193	141	200	197	99	172	85	318	299	152	195	159	130	170	265	248	245
ID1664	LINE/L1	L1-3_BT	ATAGAGAATAGACTTATGGACATGGGGAGAGGGGAGGAGAGG	0	152	181	250	159	208	229	273	215	184	198	134	205	138	222	152	132	190	194	82	148	83	298	279	142	176	134	127	149	246	237	223
ID1665	LINE/L1	L1-3_BT	ATAGATAGCCAATGGGAATTTGCTGTATGGCTCAGGAAACTC	203	143	173	88	183	168	194	103	111	144	176	120	162	118	188	185	137	129	164	99	120	75	80	258	127	164	119	138	144	192	113	180
ID1666	LINE/L1	L1-3_BT	ATAGCAAATGAAACAACTGACAAAGGATTAATTTCCAAAATA	0	328	382	419	351	369	458	461	373	370	385	374	371	325	401	372	329	346	409	180	322	248	454	547	328	376	273	301	240	472	291	377
ID1667	LINE/L1	L1-3_BT	ATAGCCAATGGGAATTTGCTGTATGGCTCAGGAAACTCAAAC	0	154	175	0	0	0	201	0	130	152	0	132	0	144	198	183	152	124	165	97	131	76	90	258	140	175	132	135	159	206	119	182
ID1668	LINE/L1	L1-3_BT	ATAGGTATACATATATCCCCTCCCTTTTGAACCTCCCTCCCA	220	132	141	151	152	156	201	152	87	137	169	146	154	106	228	164	111	142	138	83	119	69	128	237	129	146	99	121	128	213	131	197
ID1669	LINE/L1	L1-3_BT	ATAGTAAAGATGATCAAAAACCTTGAAAACAAAATGGAGAAA	192	101	136	100	131	127	158	129	125	97	124	138	119	112	174	133	80	136	116	61	117	64	117	161	110	125	91	91	107	157	79	145
ID1670	LINE/L1	L1-3_BT	ATATATATCAATAATTACTTTAAATGTAAATGGATTAAATGC	0	128	149	136	136	173	198	152	135	157	155	125	173	134	161	150	130	155	170	81	123	80	162	180	105	133	122	126	108	187	81	181
ID1671	LINE/L1	L1-3_BT	ATATATCCCCTCCCTTTTGAACCTCCCTCCCATCTCCCTCCC	147	105	99	144	129	124	147	166	92	97	131	140	133	91	195	136	76	114	115	52	99	59	171	179	102	109	81	87	89	156	134	138
ID1672	LINE/L1	L1-3_BT	ATATATGTATACCTATGGCTGATTCATGTTGAGGTTTGACAG	0	328	379	328	383	381	486	354	301	361	416	359	415	310	594	401	290	342	402	209	331	218	344	620	398	394	249	298	381	468	353	465
ID1673	LINE/L1	L1-3_BT	ATATCCCCTCCCTTTTGAACCTCCCTCCCATCTCCCTCCCCA	143	103	103	142	135	121	153	151	97	85	123	145	120	87	205	129	76	113	102	49	101	51	175	186	103	109	86	85	92	159	131	139
ID1674	LINE/L1	L1-3_BT	ATATGACCCAGCAATCCCACTCCTAGGCATATACCCTGAGGA	325	237	237	258	264	256	317	313	242	233	255	255	246	210	297	259	189	227	265	117	192	153	324	345	223	255	148	187	163	313	228	267
ID1675	LINE/L1	L1-3_BT	ATATGCCTAGGAGTGGGATTGCTGGGTCATATGGTGGTTTTA	300	246	223	298	246	274	289	342	244	247	276	230	231	230	306	260	193	231	262	115	225	154	343	344	232	264	167	195	167	294	253	274
ID1676	LINE/L1	L1-3_BT	ATATGTAAAATAGATAGCCAATGGGAATTTGCTGTATGGCTC	174	111	139	75	160	142	152	88	92	112	147	98	145	100	178	142	126	123	129	72	74	64	76	218	119	133	114	123	126	171	83	143
ID1677	LINE/L1	L1-3_BT	ATATGTATACCTATGGCTGATTCATGTTGAGGTTTGACAGAA	600	363	438	388	440	445	585	421	357	429	467	421	476	380	686	455	341	411	466	241	379	261	425	716	444	447	304	362	440	558	418	567
ID1678	LINE/L1	L1-3_BT	ATATTCCATTGTGTATATGTACCACAACTTCTTTATCCATTC	0	167	128	0	0	160	271	0	204	220	217	192	0	0	275	225	168	170	245	89	204	126	272	299	189	162	146	181	123	277	208	223
ID1679	LINE/L1	L1-3_BT	ATATTGTAGTGGTTTTTGCCATACATTGACATGAATCAGCCA	0	348	388	0	0	445	579	0	3452	416	477	453	0	352	2896	411	333	393	429	209	345	229	5765	3408	348	368	265	322	375	553	4025	532
ID1680	LINE/L1	L1-3_BT	ATATTTTGGAAATTAATCCTTTGTCAGTTGTTTCATTTGCTA	448	303	361	390	337	357	435	429	358	352	361	360	357	311	382	351	317	325	395	170	304	235	415	522	303	352	272	287	229	447	272	368
ID1681	LINE/L1	L1-3_BT	ATATTTTTCCATCCTCTCACTTTCAGTCTATATGTGTCTTTA	116	69	86	82	90	96	109	91	84	113	97	96	86	76	102	97	69	105	113	35	72	46	111	119	67	86	82	171	66	115	66	95
ID1682	LINE/L1	L1-3_BT	ATCAAAAACCTTGAAAACAAAATGGAGAAAATGCAAGAATCA	176	128	146	111	142	147	158	132	116	125	141	135	138	120	162	150	87	136	131	79	108	67	140	160	109	151	83	97	115	148	100	141
ID1683	LINE/L1	L1-3_BT	ATCAAAACAGAAAATTAATAAGGAAACACAAGTCTTAAATGA	241	158	173	177	174	168	200	205	164	179	194	183	175	171	227	192	122	173	176	88	155	106	225	228	146	176	137	153	117	219	120	181
ID1684	LINE/L1	L1-3_BT	ATCAACCTAGAGGGGTGGGATGGGGAGGGAGATGGGAGGGAG	0	130	153	0	0	143	190	0	178	131	137	220	0	120	264	154	122	147	167	80	115	65	232	288	171	152	93	114	129	192	220	174
ID1685	LINE/L1	L1-3_BT	ATCAAGGGATCAATCCAAGAGGAAGACATAACAATTGTAAAT	0	104	126	0	0	0	180	0	143	126	132	133	0	102	147	118	87	136	133	65	141	60	203	215	93	124	93	104	93	180	103	163
ID1686	LINE/L1	L1-3_BT	ATCAATACACAGAAATCACTTGCATTTCTATATACTAACAAT	268	147	199	219	176	221	246	240	205	200	209	203	190	174	211	216	140	183	214	93	160	103	229	268	187	190	144	154	124	241	147	216
ID1687	LINE/L1	L1-3_BT	ATCAGCCATAGGTATACATATATCCCCTCCCTTTTGAACCTC	0	161	170	153	195	196	246	162	95	176	186	172	208	138	293	191	145	176	183	105	149	83	138	305	187	185	136	137	163	255	132	245
ID1688	LINE/L1	L1-3_BT	ATCAGCTGTTTCACTCTCAGCCTTAAATGTTTCTCCTCTGAC	0	105	118	109	111	89	131	119	100	139	102	130	106	100	134	49	109	103	123	48	98	79	127	139	73	106	85	97	107	124	98	136
ID1689	LINE/L1	L1-3_BT	ATCAGGAATACACCTTCAGACACAGAAGTGCATGCAGAACAC	129	98	99	95	107	83	100	110	66	87	109	111	103	71	139	95	77	89	97	39	102	67	98	151	82	102	91	71	99	115	74	105
ID1690	LINE/L1	L1-3_BT	ATCAGTGAATTTAGCAAAGTTGCAGGATACAAAATCAATACA	261	138	177	207	170	211	231	214	210	194	178	208	220	184	243	192	136	182	198	81	139	122	243	286	167	177	145	164	126	238	140	196
ID1691	LINE/L1	L1-3_BT	ATCAGTGAGCTGGAAGATAAAATGGTGGAAATAACTTCTGAA	0	147	171	0	0	174	179	0	178	146	179	172	0	130	215	177	88	140	157	83	140	95	209	232	138	158	129	133	140	192	116	165
ID1692	LINE/L1	L1-3_BT	ATCATCAAAACAGAAAATTAATAAGGAAACACAAGTCTTAAA	239	152	176	180	171	165	204	206	163	176	193	176	176	166	223	181	115	170	176	91	160	99	222	227	142	184	125	142	119	218	123	189
ID1693	LINE/L1	L1-3_BT	ATCATTTAAGACTTGTGTTTCCTTATTAATTTTCTGTTTTGA	229	148	164	175	165	162	193	202	155	176	178	177	173	166	223	188	115	166	165	85	148	103	221	222	139	171	134	146	110	209	120	178
ID1694	LINE/L1	L1-3_BT	ATCCCACTCCTAGGCATATACCCTGAGGAAACCAAAATTGAA	311	208	199	251	240	192	301	283	225	201	204	231	218	157	272	225	150	230	240	120	162	113	302	299	193	228	145	142	147	293	240	276
ID1695	LINE/L1	L1-3_BT	ATCTAGAAAAATGGTACTGAAGAATTTATTTACAGGGCAGCA	0	137	140	182	0	135	174	0	156	151	156	107	142	123	204	161	131	154	162	66	126	99	214	228	119	142	110	125	125	172	170	148
ID1696	LINE/L1	L1-3_BT	ATCTAGGTTGCTTCCATGTTCTAGCTATTGTAAATAGTGCTG	441	291	343	360	343	376	487	397	377	345	373	306	362	327	407	323	287	347	370	153	290	232	446	467	282	296	278	312	259	451	334	425
ID1697	LINE/L1	L1-3_BT	ATCTCCCTCCCCATCCCACCCCTCTAGGTTGATACAGAGCCC	212	143	164	130	164	173	176	148	161	154	152	217	178	148	292	161	117	163	198	88	148	89	188	309	172	164	148	119	154	219	187	191
ID1698	LINE/L1	L1-3_BT	ATCTGTGGCAGCCTAAATGGAATGAGAATCAGACAGTCCTTG	141	114	123	115	144	136	119	140	99	123	113	125	119	99	146	131	105	126	106	57	101	84	157	147	72	117	111	97	125	129	118	113
ID1699	LINE/L1	L1-3_BT	ATCTTTCTCTTTCTGACTCACTTCACTCTGTATAATAGGTTC	0	189	211	222	206	173	246	252	208	207	215	164	196	183	227	230	132	198	203	105	171	121	259	251	167	216	159	152	171	245	183	229
ID1700	LINE/L1	L1-3_BT	ATCTTTTCATGTGTTTGTTAGCCATCTGTATGTCTTCTTTGG	7324	1684	1821	7552	1398	2188	8677	9555	2920	2914	1858	1977	1491	2563	3833	3706	1733	5419	2114	1559	1896	1312	8497	5237	927	3121	993	2731	978	8701	1357	5595
ID1701	LINE/L1	L1-3_BT	ATGAACCTAGAACCTATTATACAGAGTGAAGTGAGTCAGAAA	265	196	198	203	215	201	252	238	213	202	221	217	219	212	243	237	150	204	231	111	194	131	248	254	181	216	173	164	185	276	202	236
ID1702	LINE/L1	L1-3_BT	ATGAAGGAACAAACTAGAAACACAGAAGTCCAAATAAATGAA	0	136	157	149	181	169	206	169	148	154	155	146	156	125	193	175	108	161	145	89	132	99	128	168	121	150	123	119	136	198	103	173
ID1703	LINE/L1	L1-3_BT	ATGAATCAGCCATAGGTATACATATATCCCCTCCCTTTTGAA	0	215	223	190	0	279	345	0	180	257	276	249	281	214	448	268	216	264	252	148	233	138	231	469	279	245	171	199	232	357	205	348
ID1704	LINE/L1	L1-3_BT	ATGAATGGATAAAGAAGTTGTGGTACATATACACAATGGAAT	301	170	134	241	237	167	269	272	192	227	221	197	227	195	265	235	165	174	258	95	197	124	274	311	182	170	149	186	126	277	212	231
ID1705	LINE/L1	L1-3_BT	ATGACCCAGCAATCCCACTCCTAGGCATATACCCTGAGGAAA	356	261	246	282	280	273	342	336	271	253	277	263	255	0	324	280	208	246	284	134	202	163	354	378	245	276	161	207	179	334	254	303
ID1706	LINE/L1	L1-3_BT	ATGAGGTGGATGAACCTAGAACCTATTATACAGAGTGAAGTG	240	163	152	162	181	164	225	195	193	174	184	177	185	183	226	194	135	165	187	95	157	96	238	206	154	184	125	144	155	235	171	218
ID1707	LINE/L1	L1-3_BT	ATGATAGTAAAGATGATCAAAAACCTTGAAAACAAAATGGAG	0	97	123	96	123	117	144	121	111	93	119	118	115	98	168	119	67	122	107	52	104	54	104	151	102	115	85	81	99	145	78	137
ID1708	LINE/L1	L1-3_BT	ATGATCAAAAACCTTGAAAACAAAATGGAGAAAATGCAAGAA	174	114	136	105	120	131	161	131	108	115	134	133	126	111	160	137	82	130	119	75	104	68	143	159	112	130	92	88	105	148	86	143
ID1709	LINE/L1	L1-3_BT	ATGCAAGAATCAATTAACAAAGACCTAGAAGAATTAAAGAAT	0	136	149	0	0	144	172	0	140	141	142	153	0	109	195	158	83	128	151	89	132	101	184	198	138	143	106	109	114	168	119	164
ID1710	LINE/L1	L1-3_BT	ATGCAGAAGAATACACCTTCTTCTCAAGTGCACATGGAACAT	143	105	119	127	116	106	151	137	123	104	117	103	101	76	132	135	77	122	122	47	87	64	159	190	95	115	75	81	74	141	68	126
ID1711	LINE/L1	L1-3_BT	ATGCAGAGGTGGAAATAAAACCACAATTGAAACCCAGGGGCA	0	60	71	0	0	0	47	0	39	43	0	47	0	38	78	60	31	50	53	29	35	22	54	69	37	59	33	30	43	60	40	46
ID1712	LINE/L1	L1-3_BT	ATGGAAACTTACATTACCATATGTAAAATAGATAGCCAATGG	246	142	147	96	174	159	204	113	106	152	183	116	158	132	228	151	108	157	162	82	103	69	111	264	156	159	125	117	148	233	84	211
ID1713	LINE/L1	L1-3_BT	ATGGAAAGAGTAACATGGAAACTTACATTACCATATGTAAAA	361	257	281	210	262	298	397	225	194	275	282	209	290	225	429	274	190	269	315	154	249	62	279	447	240	284	214	203	238	396	167	373
ID1714	LINE/L1	L1-3_BT	ATGGAAGCAACCTAGATGTCCATCAACAGATGAATGGATAAA	0	172	178	218	177	200	243	0	192	213	211	192	200	212	235	177	190	203	238	108	183	146	236	278	184	177	150	207	134	243	188	229
ID1715	LINE/L1	L1-3_BT	ATGGACATCTAGGTTGCTTCCATGTTCTAGCTATTGTAAATA	0	259	307	0	0	327	428	0	333	323	365	292	306	300	359	298	258	317	342	135	272	223	413	454	239	271	281	295	241	424	288	384
ID1716	LINE/L1	L1-3_BT	ATGGACATGGGGAGAGGGGAGGAGAGGGTGAGATGTATGGAA	250	175	196	217	186	218	233	263	215	192	218	170	211	0	233	197	132	179	195	114	160	56	306	307	145	194	157	125	178	247	206	226
ID1717	LINE/L1	L1-3_BT	ATGGAGAAAATGCAAGAATCAATTAACAAAGACCTAGAAGAA	0	150	162	0	0	0	180	0	141	0	0	150	0	0	174	169	0	143	163	88	133	106	181	197	140	158	109	122	119	165	117	161
ID1718	LINE/L1	L1-3_BT	ATGGAGAAACAGACATAGAGAATAGACTTATGGACATGGGGA	196	128	152	206	123	154	196	238	170	161	166	90	141	100	232	145	115	151	177	72	143	76	235	254	116	134	100	121	115	218	170	176
ID1719	LINE/L1	L1-3_BT	ATGGAGATTCCTTAAAAAACTAGGAATAAAACCACCATATGA	0	171	167	0	0	177	247	0	193	173	214	193	0	165	282	197	134	192	194	102	152	97	253	341	169	176	145	125	105	254	166	216
ID1720	LINE/L1	L1-3_BT	ATGGATAAAGAAGTTGTGGTACATATACACAATGGAATATTA	275	149	121	243	215	162	266	270	195	213	216	161	209	191	274	203	163	159	236	84	196	128	264	294	195	151	142	176	129	259	206	224
ID1721	LINE/L1	L1-3_BT	ATGGCAAAAACCACTACAATATTGTAAAGTAATTAGCCTCCA	0	412	470	4489	481	487	626	4768	3724	475	510	539	492	353	1169	468	344	440	506	236	391	272	6062	1224	466	428	326	351	432	648	4301	612
ID1722	LINE/L1	L1-3_BT	ATGGCCATCATCAAAAAGTCTACAAACAATAAATGCTGGAGA	352	249	264	300	254	234	307	336	285	282	260	268	288	229	362	287	226	260	303	138	241	168	393	457	229	268	191	220	203	339	277	280
ID1723	LINE/L1	L1-3_BT	ATGGCTCAGGAAACTCAAACAGGGGCTCTGTATCAACCTAGA	0	289	323	150	328	316	351	153	208	323	354	333	334	277	448	339	260	257	321	155	300	196	165	517	285	317	261	236	280	387	201	382
ID1724	LINE/L1	L1-3_BT	ATGGCTGATTCATGTCAATGTATGGCAAAAACCACTACAATA	600	370	403	4499	415	463	579	4683	4066	428	499	475	432	379	2959	441	347	412	460	218	373	240	6176	3498	377	393	279	365	398	565	4418	538
ID1725	LINE/L1	L1-3_BT	ATGGGAGGGAGGTTCAAAAGGGAGGGGATATATGTATACCTA	214	136	139	134	151	148	196	136	78	137	165	144	147	98	215	163	100	140	132	81	115	72	127	219	117	149	99	113	127	205	130	194
ID1726	LINE/L1	L1-3_BT	ATGGGGAGAGGGGAGGAGAGGGTGAGATGTATGGAAAGAGTA	0	183	204	0	0	225	252	0	238	217	226	181	0	168	284	206	142	177	213	104	166	26	346	351	183	203	157	155	184	247	239	245
ID1727	LINE/L1	L1-3_BT	ATGGTAATGTAAGTTTCCATGTTACTCTTTCCATACATCTCA	359	272	285	214	292	290	361	237	218	288	292	222	291	241	419	289	187	274	318	165	259	37	302	446	226	296	204	200	255	374	195	333
ID1728	LINE/L1	L1-3_BT	ATGGTGGAAATAACTTCTGAAGAGCAGAATAAAGTAAAAAGA	215	137	165	157	170	179	185	184	173	170	157	179	186	117	196	165	100	152	191	83	147	93	207	211	136	137	109	124	132	206	122	181
ID1729	LINE/L1	L1-3_BT	ATGGTGTTAGGAAGTGTTCTAATTTCATTCTTTTACATGTAG	0	207	245	0	0	0	248	0	220	238	0	196	0	191	274	239	185	232	247	123	197	128	304	322	185	217	147	182	140	272	218	219
ID1730	LINE/L1	L1-3_BT	ATGTAAAAGAATGAAATTAGAACACTTCCTAACACCATACAC	312	202	234	272	242	254	277	309	226	236	231	189	248	0	283	228	189	221	228	120	221	136	346	360	196	229	155	193	146	279	227	231
ID1731	LINE/L1	L1-3_BT	ATGTAAAATAGATAGCCAATGGGAATTTGCTGTATGGCTCAG	183	126	151	82	179	171	172	103	100	124	158	118	154	117	185	156	131	137	143	78	86	67	82	235	133	149	114	131	133	186	100	166
ID1732	LINE/L1	L1-3_BT	ATGTATACCTATGGCTGATTCATGTTGAGGTTTGACAGAAAA	0	383	465	0	0	472	634	0	393	456	489	464	0	400	712	462	368	449	491	262	397	276	484	747	473	470	314	385	463	597	451	609
ID1733	LINE/L1	L1-3_BT	ATGTATGGCAAAAACCACTACAATATTGTAAAGTAATTAGCC	606	357	395	4032	415	435	568	4355	3316	416	455	468	430	302	3079	396	292	401	431	186	347	216	5596	3528	398	376	262	286	371	600	3959	555
ID1734	LINE/L1	L1-3_BT	ATGTCAATGTATGGCAAAAACCACTACAATATTGTAAAGTAA	531	302	337	4022	367	394	504	4374	3245	368	410	477	387	288	3016	372	286	360	382	178	313	193	5524	3369	324	340	231	277	330	517	3898	482
ID1735	LINE/L1	L1-3_BT	ATGTCTGTTTCTCCATTGCTGCCCTGTAAATAAATTCTTCAG	148	92	92	149	102	130	143	164	138	125	133	101	135	92	157	103	106	103	143	45	115	82	173	208	97	100	69	89	81	160	136	140
ID1736	LINE/L1	L1-3_BT	ATGTGGTCTATCCTGGAGAATGTTCCATGTGCACTTGAGAAG	207	132	146	173	158	145	200	177	144	137	187	135	156	120	189	162	100	149	169	73	145	86	210	219	125	144	113	123	114	213	114	178
ID1737	LINE/L1	L1-3_BT	ATGTTACTCTTTCCATACATCTCACCCTCTCCTCCCCTCTCC	263	193	231	225	207	252	260	278	234	225	245	228	247	0	315	224	155	187	219	112	197	37	339	393	182	224	188	159	206	265	228	249
ID1738	LINE/L1	L1-3_BT	ATGTTGAGGTTTGACAGAAAACAACAAAATTCTGTAAAGCAA	562	379	390	401	438	434	523	402	346	420	458	390	450	372	667	419	306	401	427	218	354	262	478	630	386	416	278	311	416	507	388	523
ID1739	LINE/L1	L1-3_BT	ATGTTGAGGTTTGACAGAAAACAGCAAAATTCTGTAAAGCAA	0	215	219	259	248	224	290	0	216	255	240	250	228	187	276	248	171	224	273	116	180	134	296	336	177	235	175	177	232	267	271	286
ID1740	LINE/L1	L1-3_BT	ATGTTGATGTATGGCAAAACCAATACAATATTGTAAAGTAAT	0	2367	2785	1	2994	3045	2834	0	0	2773	2908	9	2666	2534	0	3058	2100	2152	3183	1481	2552	1681	0	2	0	3026	1894	2384	2696	2930	0	2635
ID1741	LINE/L1	L1-3_BT	ATGTTTATTCTTTAATTCTTCTAGGTCTTTGTTAATTGATTC	166	130	141	116	137	139	150	145	136	124	129	137	145	97	165	158	80	145	140	98	111	85	155	154	121	142	101	101	102	161	102	144
ID1742	LINE/L1	L1-3_BT	ATTAAAAATACTCTAGAAGGAATCAATAGCAGAATATCTGAA	218	122	150	144	159	116	189	157	128	159	150	164	151	113	191	157	104	162	179	70	130	88	184	194	113	134	117	140	139	189	120	198
ID1743	LINE/L1	L1-3_BT	ATTACCATATGTAAAATAGATAGCCAATGGGAATTTGCTGTA	255	163	190	93	211	192	227	104	108	161	198	131	191	142	231	205	144	179	181	105	105	82	113	272	174	179	129	153	182	235	107	230
ID1744	LINE/L1	L1-3_BT	ATTACTTTACAATATTGTAGTGGTTTTTGCCATACATTGACA	532	308	340	4005	367	395	498	4392	3267	374	406	472	387	292	3030	372	289	363	388	179	313	207	5516	3377	324	343	227	280	333	518	3917	479
ID1745	LINE/L1	L1-3_BT	ATTCAGAATAATGATAGTAAAGATGATCAAAAACCTTGAAAA	208	127	146	142	155	156	183	160	133	139	149	148	157	120	170	163	101	132	147	80	140	72	145	191	131	145	109	113	135	185	95	183
ID1746	LINE/L1	L1-3_BT	ATTCATGTCAATGTATGGCAAAAACCACTACAATATTGTAAA	0	317	357	0	0	407	526	0	3358	395	436	489	0	319	2956	378	312	374	404	173	335	211	5707	3386	331	347	252	295	339	525	3935	499
ID1747	LINE/L1	L1-3_BT	ATTCATGTTGAGGTTTGACAGAAAACAACAAAATTCTGTAAA	605	404	403	440	455	470	578	420	372	429	477	409	489	0	676	444	319	422	462	230	383	279	505	674	409	449	315	331	442	549	439	575
ID1748	LINE/L1	L1-3_BT	ATTCATGTTGAGGTTTGACAGAAAACAGCAAAATTCTGTAAA	291	215	208	278	240	231	291	279	223	248	235	258	231	195	304	244	183	236	275	120	185	130	313	348	170	238	189	210	232	273	262	285
ID1749	LINE/L1	L1-3_BT	ATTCATGTTGATGTATGGCAAAACCAATACAATATTGTAAAG	3278	2675	3238	0	3340	3365	3200	0	1	3098	3172	9	2902	2893	0	3440	2362	2496	3545	1684	2801	1931	0	4	1	3352	2125	2660	3049	3279	0	2975
ID1750	LINE/L1	L1-3_BT	ATTCCTTAAAAAACTAGGAATAAAACCACCATATGACCCAGC	212	157	167	214	178	179	219	249	159	162	194	174	176	149	283	186	127	183	177	96	154	97	243	327	164	161	144	116	107	229	158	203
ID1751	LINE/L1	L1-3_BT	ATTCTCTATGTCTGTTTCTCCATTGCTGCCCTGTAAATAAAT	118	89	89	109	94	102	125	136	127	100	94	74	113	91	137	97	87	92	130	51	92	62	152	187	80	88	62	70	76	143	114	115
ID1752	LINE/L1	L1-3_BT	ATTCTGCTCTTCAGAAGTTATTTCCACCATTTTATCTTCCAG	233	146	175	158	186	182	176	165	177	178	167	186	182	142	197	181	104	142	182	85	143	103	194	234	139	155	122	143	157	202	113	174
ID1753	LINE/L1	L1-3_BT	ATTCTTCTAGGTCTTTGTTAATTGATTCTTGCATTTTCTCCA	188	145	151	152	153	148	180	169	137	147	155	148	141	123	174	161	91	135	155	84	129	102	174	194	138	154	99	121	118	165	118	160
ID1754	LINE/L1	L1-3_BT	ATTCTTGCATTTTCTCCATTTTGTTTTCAAGGTTTTTGATCA	172	117	135	112	119	136	154	132	110	118	137	136	125	106	161	135	81	131	120	72	106	67	144	158	114	136	87	85	107	147	92	140
ID1755	LINE/L1	L1-3_BT	ATTCTTTTTACTTTATTCTGCTCTTCAGAAGTTATTTCCACC	219	143	164	162	167	178	186	186	177	171	155	176	191	110	191	164	95	158	194	83	150	99	211	211	134	145	112	122	139	209	125	192
ID1756	LINE/L1	L1-3_BT	ATTGAAGGATAATTGCTTTACAGAATTTTGCTGTTTTCTGTC	286	206	214	290	247	244	271	306	218	241	249	280	241	202	320	222	195	226	234	106	213	153	323	359	201	223	178	183	219	278	279	283
ID1757	LINE/L1	L1-3_BT	ATTGAAGGATAATTGCTTTACAGAATTTTGTTGTTTTCTGTC	730	507	491	560	547	586	702	586	466	523	569	544	593	448	813	537	439	548	562	246	466	359	592	727	504	524	411	421	522	703	537	681
ID1758	LINE/L1	L1-3_BT	ATTGATTCTTGCATTTTCTCCATTTTGTTTTCAAGGTTTTTG	177	116	134	109	135	138	153	132	107	113	139	136	136	0	158	139	78	127	126	77	104	65	133	158	108	147	80	86	106	148	90	133
ID1759	LINE/L1	L1-3_BT	ATTGCTGGGTCATATGGTGGTTTTATTCCTAGTTTTTTAAGG	232	180	194	228	196	203	233	265	177	166	210	180	184	174	289	203	133	184	187	103	154	108	264	327	172	185	158	129	115	249	181	221
ID1760	LINE/L1	L1-3_BT	ATTGCTTTACAGAATTTTGTTGTTTTCTGTCAAACCTCAACA	563	368	388	412	435	424	526	416	346	427	446	387	443	361	670	416	300	413	429	219	357	260	481	635	382	407	279	311	410	512	403	524
ID1761	LINE/L1	L1-3_BT	ATTGTAGTGGTTTTTGCCATACATTGACATGAATCAGCCATG	573	366	407	4502	439	459	563	4660	4059	420	494	464	422	375	2920	439	340	398	435	218	373	235	6132	3472	358	388	279	356	389	547	4393	521
ID1762	LINE/L1	L1-3_BT	ATTTAAGACTTGTGTTTCCTTATTAATTTTCTGTTTTGATGA	0	157	176	0	0	0	203	0	164	171	0	180	0	167	229	188	0	166	170	92	157	98	225	234	140	184	124	148	120	217	123	185
ID1763	LINE/L1	L1-3_BT	ATTTACAATAGCTAGAACATGGAAGCAACCTAGATGTCCATC	0	199	228	224	214	236	302	257	220	236	263	211	217	0	256	210	194	233	257	104	196	169	275	330	155	203	220	221	189	311	208	272
ID1764	LINE/L1	L1-3_BT	ATTTACTGAGGTTTGATTTGTGACCCAAGATGTGGTCTATCC	176	115	141	168	131	148	168	164	130	150	149	148	148	131	180	153	96	119	174	71	146	71	193	218	100	145	101	121	106	190	91	151
ID1765	LINE/L1	L1-3_BT	ATTTATCTTTCTCTTTCTGACTCACTTCACTCTGTATAATAG	282	200	225	247	233	196	278	283	231	219	230	192	203	202	258	257	147	203	216	121	177	132	281	298	194	226	161	164	182	268	191	251
ID1766	LINE/L1	L1-3_BT	ATTTATTTATTTTAATTGGAGGCTAATTACTTTACAATATTG	2797	1773	1996	541	2040	2229	2499	671	494	2005	2108	1003	2051	1702	951	2157	1400	1947	2167	1042	1811	1129	735	991	534	2021	1501	1588	1866	2686	532	2369
ID1767	LINE/L1	L1-3_BT	ATTTATTTGGACTTCTGTGTTTCTAGTTTGTTCCTTCATTTG	0	134	160	148	0	174	197	0	142	151	153	134	151	122	185	166	95	161	147	86	124	100	114	158	121	151	128	118	131	205	101	154
ID1768	LINE/L1	L1-3_BT	ATTTCAATTTTCTTAAATTTACTGAGGTTTGATTTGTGACCC	217	137	173	177	165	194	212	202	146	154	168	174	181	135	213	171	121	157	200	81	155	89	215	237	132	157	132	125	126	219	101	201
ID1769	LINE/L1	L1-3_BT	ATTTCATTCTTTTACATGTAGCTGTCCAGTTTTCCCAGCACC	0	247	265	248	279	281	335	0	248	253	258	229	289	199	290	281	192	266	261	133	203	149	298	365	218	248	188	192	186	331	202	292
ID1770	LINE/L1	L1-3_BT	ATTTCTCCAAAGAAGACATACAGATGGCTAACAAACACATGA	7228	1648	1820	7672	1394	2236	8541	9528	2904	2867	1862	3227	1525	2534	3669	3721	1715	5358	2099	1544	1859	1297	8826	4916	916	3116	1007	2724	931	8555	1330	5591
ID1771	LINE/L1	L1-3_BT	ATTTGTTGTAAAGCTGGTTTGGTGGTACTGAATTCTCTTAAC	217	148	155	138	152	164	191	161	140	151	165	145	173	158	178	183	123	169	154	78	143	103	185	221	134	173	113	155	121	178	98	172
ID1772	LINE/L1	L1-3_BT	ATTTTACATATGGTAATGTAAGTTTCCATGTTACTCTTTCCA	0	252	256	0	0	0	395	0	189	261	0	200	0	220	415	257	0	264	305	146	240	63	289	437	235	273	215	195	242	385	165	363
ID1773	LINE/L1	L1-3_BT	ATTTTCTTAAATTTACTGAGGTTTGATTTGTGACCCAAGATG	193	130	172	168	157	175	179	195	145	152	158	169	165	128	202	165	116	152	192	78	152	82	204	217	114	154	119	117	122	196	92	171
ID1774	LINE/L1	L1-3_BT	ATTTTGTTGTTTTCTGTCAAACCTCAACATGAATCAGCCATA	515	319	343	349	401	381	509	342	297	357	403	356	409	348	547	378	292	331	407	210	311	231	396	584	399	372	267	299	377	480	381	511
ID1775	LINE/L1	L1-3_BT	ATTTTTCATTGTTAGTATATAGAAATGCAAGTGATTTCTGTG	261	156	207	215	201	220	250	244	187	202	207	205	196	181	235	228	151	191	205	102	167	109	244	283	199	210	136	154	132	251	157	222
ID1776	LINE/L1	L1-3_BT	CAAAAGTTAAGAGAATTCAGTACCACCAAACCAGCTTTACAA	0	153	150	139	155	172	197	171	146	157	183	145	179	140	186	179	124	164	156	80	144	98	186	222	118	177	118	147	118	187	98	186
ID1777	LINE/L1	L1-3_BT	CAAAATGGAGAAAATGCAAGAATCAATTAACAAAGACCTAGA	180	123	140	131	143	139	154	148	121	129	136	125	138	116	157	146	85	130	140	74	116	89	151	180	116	136	92	105	107	139	96	141
ID1778	LINE/L1	L1-3_BT	CAAACAGGGGCTCTGTATCAACCTAGAGGGGTGGGATGGGGA	287	193	237	147	219	229	243	166	203	199	215	288	227	192	365	227	161	227	238	127	195	99	217	401	202	218	189	163	214	307	214	279
ID1779	LINE/L1	L1-3_BT	CAAACCTCAACATGAATCAGCCATAGGTATACATATATCCCC	397	260	297	250	305	291	380	268	222	285	323	280	316	0	498	308	214	279	303	168	238	175	260	504	316	307	195	216	302	357	258	363
ID1780	LINE/L1	L1-3_BT	CAAACTAGAAACACAGAAGTCCAAATAAATGAAGAGGAAATA	203	134	147	147	161	149	197	157	138	142	156	144	131	112	175	153	86	162	131	76	116	84	114	156	114	136	120	108	117	189	107	178
ID1781	LINE/L1	L1-3_BT	CAAAGAAGACATACAGATGGCTAACAAACACATGAAAAGATG	7360	1666	1807	7554	1392	2204	8680	9570	2929	2916	1872	1961	1507	2547	3833	3706	1732	5438	2121	1544	1903	1312	8519	5253	928	3121	982	2730	965	8723	1362	5596
ID1782	LINE/L1	L1-3_BT	CAAATTCCCATTGGCTATCTATTTTACATATGGTAATGTAAG	255	133	150	92	174	164	190	109	113	144	180	113	183	128	218	161	105	156	152	77	108	62	123	247	151	152	119	130	149	223	94	203
ID1783	LINE/L1	L1-3_BT	CAACAAAATTCTGTAAAGCAATTATCCTTCAATTAAAAAATA	270	183	188	184	210	206	241	209	155	193	195	226	218	0	296	174	154	201	218	88	163	127	229	291	171	191	147	156	182	247	194	239
ID1784	LINE/L1	L1-3_BT	CAAGAATCAATTAACAAAGACCTAGAAGAATTAAAGAATAAA	0	141	146	145	0	147	156	0	142	138	144	149	149	108	186	168	85	138	162	96	131	95	184	183	136	144	111	107	112	170	109	147
ID1785	LINE/L1	L1-3_BT	CAAGATGTGGTCTATCCTGGAGAATGTTCCATGTGCACTTGA	222	145	148	172	161	132	209	169	166	131	169	136	160	121	183	164	94	130	145	72	140	87	210	208	117	154	106	114	110	211	114	176
ID1786	LINE/L1	L1-3_BT	CAAGCAGCTGCACCACCTCCACACCTGGCCCTCACAGGGGCA	103	71	67	75	91	76	79	71	64	90	87	54	87	79	79	82	72	61	97	44	73	49	60	88	64	74	52	54	56	85	36	72
ID1787	LINE/L1	L1-3_BT	CAAGGTGAAAAGACAACCCTCAGAATGGGAGAAAATAATAGC	0	235	279	299	310	255	340	313	239	246	265	301	275	214	291	274	227	232	260	160	213	142	339	400	211	275	179	213	188	326	226	290
ID1788	LINE/L1	L1-3_BT	CAATACAATATTGTAAAGTAATTAACCTCCAATTAAAATAAA	932	1537	1840	2	2050	2115	901	5	6	1872	1949	37	1799	1730	2	2014	1301	656	2076	1011	1725	1139	4	2	2	1931	1391	1623	1856	930	8	856
ID1789	LINE/L1	L1-3_BT	CAATACACAGAAATCACTTGCATTTCTATATACTAACAATGA	0	146	201	219	188	211	242	252	197	189	208	203	185	167	216	218	141	179	201	97	154	101	231	270	192	191	143	153	130	249	152	212
ID1790	LINE/L1	L1-3_BT	CAATATTGTAGTGGTTTTTGCCATACATTGACATGAATCAGC	0	328	359	0	0	0	531	0	3288	0	0	432	0	336	2979	374	0	353	395	195	330	207	5639	3447	328	349	242	300	342	524	3887	500
ID1791	LINE/L1	L1-3_BT	CAATGGAGAAACAGACATAGAGAATAGACTTATGGACATGGG	0	133	145	0	0	0	0	0	173	0	0	90	0	92	236	145	0	145	177	77	140	77	230	247	118	137	97	117	123	223	169	181
ID1792	LINE/L1	L1-3_BT	CAATGGGAATTTGCTGTATGGCTCAGGAAACTCAAACAGGGG	193	177	164	82	193	176	197	100	120	168	191	157	173	132	200	187	133	120	177	96	134	94	91	258	135	185	144	124	164	209	101	189
ID1793	LINE/L1	L1-3_BT	CAATGTATGGCAAAAACCACTACAATATTGTAAAGTAATTAG	0	332	365	0	0	0	526	0	3395	0	0	451	0	301	3089	395	0	375	399	180	323	211	5717	3503	375	362	244	282	346	533	4070	503
ID1794	LINE/L1	L1-3_BT	CAATTGTCTGAGTCAGAGGAGAAACATTTAAGGCTGAGAGTG	0	75	85	0	0	0	108	0	72	98	0	69	0	75	104	48	60	79	94	42	79	59	94	93	56	71	61	73	66	105	79	98
ID1795	LINE/L1	L1-3_BT	CAATTTTCTTAAATTTACTGAGGTTTGATTTGTGACCCAAGA	188	131	165	174	151	177	185	196	148	136	161	167	166	127	205	162	115	146	187	73	147	85	208	222	117	155	124	118	116	189	92	173
ID1796	LINE/L1	L1-3_BT	CACAAATGAAGGAACAAACTAGAAACACAGAAGTCCAAATAA	205	128	150	137	150	164	200	159	133	147	151	121	146	0	181	158	89	150	143	76	126	106	97	157	114	142	128	113	125	191	92	161
ID1797	LINE/L1	L1-3_BT	CACACCAATGGACAGATCATCAAAACAGAAAATTAATAAGGA	0	140	183	170	153	161	208	0	154	169	177	164	172	0	204	187	112	166	185	90	132	114	226	231	132	161	120	140	121	235	116	181
ID1798	LINE/L1	L1-3_BT	CACATATAGACTGAAAGTGAGAGGATGGAAAAATATATTCCA	198	106	127	117	134	150	174	138	125	167	154	138	153	120	170	150	96	142	173	59	119	75	177	173	129	136	95	215	109	179	72	144
ID1799	LINE/L1	L1-3_BT	CACATCTTGGGTCACAAATCAAACCTCAGTAAATTTAAGAAA	0	151	190	205	182	208	214	227	166	182	201	198	188	165	235	197	147	175	220	100	186	101	242	267	142	181	148	146	148	241	121	197
ID1800	LINE/L1	L1-3_BT	CACATGCAGAGGTGGAAATAAAACCACAATTGAAACCCAGGG	78	65	75	48	61	66	51	65	33	44	50	53	62	46	84	64	36	53	58	30	43	29	62	82	45	56	35	31	52	66	41	49
ID1801	LINE/L1	L1-3_BT	CACCAATGGACAGATCATCAAAACAGAAAATTAATAAGGAAA	235	149	186	172	166	173	217	206	158	180	178	181	183	138	220	195	121	176	181	94	149	124	226	235	139	172	128	147	126	243	122	190
ID1802	LINE/L1	L1-3_BT	CACCATATGACCCAGCAATCCCACTCCTAGGCATATACCCTG	282	234	232	242	249	244	283	308	219	221	232	217	233	190	281	245	175	205	241	107	185	124	284	327	206	249	134	175	158	280	223	238
ID1803	LINE/L1	L1-3_BT	CACCCCTCTAGGTTGATACAGAGCCCCTGTTTGAGTTTCCTG	424	284	325	187	310	323	358	187	260	294	319	345	312	297	463	322	263	292	312	156	290	204	272	503	265	315	258	239	289	400	302	380
ID1804	LINE/L1	L1-3_BT	CACCCTCTCCTCCCCTCTCCCCATGTCCATAAGTCTATTCTC	249	158	206	252	176	211	237	266	214	199	202	161	207	151	226	185	139	196	193	98	163	90	312	295	147	184	154	125	169	247	240	227
ID1805	LINE/L1	L1-3_BT	CACCTTCAGACACAGAAGTGCATGCAGAACACCAGCTGAGAG	134	105	112	71	108	74	117	87	72	117	128	115	118	94	127	111	85	102	129	47	102	90	93	135	91	105	95	77	95	123	68	110
ID1806	LINE/L1	L1-3_BT	CACCTTCTTCTCAAGTGCACATGGAACATTCTCCAGGATAGA	168	97	117	123	109	109	154	123	114	110	126	119	111	89	137	125	67	110	124	53	100	68	146	187	93	106	78	86	69	155	73	131
ID1807	LINE/L1	L1-3_BT	CACTACAATATTGTAAAGTAATTAGCCTCCAATTAAAATAAA	0	566	617	0	0	0	821	0	581	615	0	636	0	489	1104	600	431	610	632	283	514	360	826	1186	618	583	458	436	538	848	638	801
ID1808	LINE/L1	L1-3_BT	CACTACATAATGATCAAGGGATCAATCCAAGAGGAAGACATA	194	116	136	144	134	151	178	158	130	128	156	131	155	0	147	141	77	150	138	65	128	59	185	177	105	133	86	88	91	180	83	167
ID1809	LINE/L1	L1-3_BT	CACTATTTACAATAGCTAGAACATGGAAGCAACCTAGATGTC	429	270	335	342	326	352	453	387	352	319	358	298	315	329	372	313	270	331	352	147	280	227	429	464	270	284	291	306	253	443	304	383
ID1810	LINE/L1	L1-3_BT	CACTCACACCAATGGACAGATCATCAAAACAGAAAATTAATA	204	123	162	156	133	143	182	175	138	143	146	160	155	119	186	169	114	139	163	79	102	100	201	216	116	147	89	138	117	207	100	158
ID1811	LINE/L1	L1-3_BT	CAGAAAACAACAAAATTCTGTAAAGCAATTATCCTTCAATAA	353	222	232	253	242	282	343	289	213	239	279	259	288	208	433	242	207	271	282	112	230	152	299	374	238	235	198	187	256	363	261	337
ID1812	LINE/L1	L1-3_BT	CAGAAAACAACAAAATTCTGTAAAGCAATTATCCTTCAATTA	411	294	277	325	311	322	390	320	262	308	314	314	320	240	413	295	240	298	311	136	261	203	325	395	283	303	247	233	273	376	302	375
ID1813	LINE/L1	L1-3_BT	CAGAAAATTAATAAGGAAACACAAGTCTTAAATGATACATTA	0	131	151	0	0	154	177	0	133	166	152	166	0	157	223	167	91	151	152	81	140	87	204	204	132	159	115	111	103	197	116	170
ID1814	LINE/L1	L1-3_BT	CAGAAACCAACACAACATTGTAAAGCAATTATCCTCCAATTA	170	102	119	91	133	150	163	93	97	125	140	118	134	100	193	123	92	107	151	59	116	83	138	194	66	61	90	89	113	180	72	163
ID1815	LINE/L1	L1-3_BT	CAGAATGGCCATCATCAAAAAGTCTACAAACAATAAATGCTG	369	249	287	330	266	250	331	352	292	306	289	269	304	253	374	298	244	281	331	143	256	183	406	460	228	273	223	241	213	348	302	307
ID1816	LINE/L1	L1-3_BT	CAGAATGGGAGAAAATAATAGCAAATGAAACAACTGACAAAG	502	361	378	448	382	417	486	508	379	396	402	990	405	358	483	396	334	380	449	207	354	262	515	560	382	421	286	304	258	491	356	422
ID1817	LINE/L1	L1-3_BT	CAGAATTTTGCTGTTTTCTGTCAAACCTCAACATGAATCAGC	0	196	195	0	0	0	253	0	197	220	0	215	0	176	281	221	0	201	240	108	172	111	277	311	145	214	171	198	208	246	215	252
ID1818	LINE/L1	L1-3_BT	CAGAATTTTGTTGTTTTCTGTCAAACCTCAACATGAATCAGC	0	355	350	0	0	0	502	0	318	387	0	361	0	351	585	394	282	365	420	207	340	240	456	585	384	386	277	286	382	486	396	503
ID1819	LINE/L1	L1-3_BT	CAGACATAGAGAATAGACTTATGGACATGGGGAGAGGGGAGG	206	155	171	239	154	195	215	252	196	177	189	116	190	119	224	159	132	163	196	76	121	76	255	270	123	170	128	123	142	237	204	213
ID1820	LINE/L1	L1-3_BT	CAGACATTTCTCCAAAGAAGACATACAGATGGCTAACAAACA	0	1015	1076	7552	920	1278	2139	9869	2811	2433	1180	3161	1053	1354	3615	1564	983	1501	1531	758	1059	717	8757	4762	865	1505	671	1231	504	2120	1272	1060
ID1821	LINE/L1	L1-3_BT	CAGAGCCCCTGTTTGAGTTTCCTGAGCCATACAGCAAATTCC	439	356	348	210	365	376	424	215	238	359	383	340	375	308	462	360	268	275	350	168	326	212	232	564	287	360	304	240	338	429	221	432
ID1822	LINE/L1	L1-3_BT	CAGATGAATGGATAAAGAAGTTGTGGTACATATACACAATGG	0	153	130	231	233	178	251	0	199	226	225	191	212	180	241	232	153	180	256	89	193	113	268	286	181	151	152	168	130	259	212	216
ID1823	LINE/L1	L1-3_BT	CAGCAATCCCACTCCTAGGCATATACCCTGAGGAAACCAAAA	0	242	217	0	0	225	319	0	239	198	239	266	0	190	297	253	167	245	253	120	169	150	342	332	238	248	158	176	173	303	238	288
ID1824	LINE/L1	L1-3_BT	CAGCCATAGGTATACATATATCCCCTCCCTTTTGAACCTCCC	220	153	152	151	167	160	221	154	89	153	172	155	192	112	261	169	132	150	166	93	132	75	133	279	163	171	121	130	148	227	134	219
ID1825	LINE/L1	L1-3_BT	CAGCTGATCTGTGGCAGCCTAAATGGAATGAGAATCAGACAG	155	105	115	104	134	127	125	121	102	112	101	100	114	93	137	130	87	121	99	52	90	75	158	119	82	103	90	84	117	130	112	122
ID1826	LINE/L1	L1-3_BT	CAGCTGCACCACCTCCACACCTGGCCCTCACAGGGGCAAACC	101	64	64	54	87	72	85	58	51	80	80	62	88	66	79	71	66	59	91	40	65	37	56	78	62	65	48	52	52	83	28	76
ID1827	LINE/L1	L1-3_BT	CAGCTGTTTCACTCTCAGCCTTAAATGTTTCTCCTCTGACTC	149	110	122	108	119	93	139	118	105	140	103	128	110	102	138	59	113	108	127	54	101	83	125	149	84	111	89	97	110	134	106	146
ID1828	LINE/L1	L1-3_BT	CAGGAATACACCTTCAGACACAGAAGTGCATGCAGAACACCA	123	105	102	94	107	83	103	112	65	87	121	109	104	78	134	100	82	92	95	42	97	78	99	145	80	110	92	79	99	114	72	107
ID1829	LINE/L1	L1-3_BT	CAGGATAGACCACATCTTGGGTCACAAATCAAACCTCAGTAA	174	112	137	173	125	143	171	174	131	146	150	152	140	127	182	145	92	119	170	69	142	71	199	228	102	145	98	116	110	185	92	148
ID1830	LINE/L1	L1-3_BT	CAGGGCAGCAATGGAGAAACAGACATAGAGAATAGACTTATG	139	105	117	137	109	133	143	153	121	119	120	83	123	0	177	126	86	121	148	66	107	68	167	202	93	112	78	88	85	156	138	135
ID1831	LINE/L1	L1-3_BT	CAGGGGCTCTGTATCAACCTAGAGGGGTGGGATGGGGAGGGA	234	156	196	148	180	193	188	157	190	160	175	239	190	158	315	193	133	181	201	102	160	97	202	353	183	181	162	130	183	248	193	214
ID1832	LINE/L1	L1-3_BT	CAGTGAGCTGGAAGATAAAATGGTGGAAATAACTTCTGAAGA	213	141	168	183	166	173	176	188	180	152	176	163	169	125	213	170	91	135	156	81	140	101	217	243	142	150	129	124	133	195	117	167
ID1833	LINE/L1	L1-3_BT	CAGTTCTAATGAGGTGGATGAACCTAGAACCTATTATACAGA	0	151	152	0	0	0	171	0	149	0	0	128	0	140	188	178	0	133	166	77	127	85	205	193	143	164	100	118	119	169	152	157
ID1834	LINE/L1	L1-3_BT	CATACAGCAAATTCCCATTGGCTATCTATTTTACATATGGTA	0	185	217	94	237	235	258	108	111	179	228	150	224	0	281	220	165	210	206	115	116	92	114	320	196	196	147	169	208	273	109	262
ID1835	LINE/L1	L1-3_BT	CATACATCTCACCCTCTCCTCCCCTCTCCCCATGTCCATAAG	0	208	220	256	213	262	269	280	248	239	253	191	263	0	270	232	144	212	218	135	173	81	346	335	156	238	174	141	197	287	247	264
ID1836	LINE/L1	L1-3_BT	CATAGAGAATAGACTTATGGACATGGGGAGAGGGGAGGAGAG	0	159	186	246	165	209	231	272	216	188	201	136	203	134	223	155	126	184	196	82	143	89	292	274	136	179	137	124	156	255	234	229
ID1837	LINE/L1	L1-3_BT	CATAGGTATACATATATCCCCTCCCTTTTGAACCTCCCTCCC	228	137	149	160	165	158	211	159	91	136	172	153	158	109	236	171	117	148	141	88	128	67	141	253	143	153	108	120	139	219	140	206
ID1838	LINE/L1	L1-3_BT	CATATAGACTGAAAGTGAGAGGATGGAAAAATATATTCCATG	0	120	153	133	150	157	182	158	132	168	175	141	162	126	164	163	105	143	176	70	125	81	185	188	127	146	97	225	124	177	69	155
ID1839	LINE/L1	L1-3_BT	CATATGACCCAGCAATCCCACTCCTAGGCATATACCCTGAGG	311	231	238	245	252	250	297	304	229	219	242	236	237	202	287	250	177	214	251	115	181	138	302	334	217	249	142	184	155	299	221	253
ID1840	LINE/L1	L1-3_BT	CATATGGTAATGTAAGTTTCCATGTTACTCTTTCCATACATC	338	235	257	174	261	257	343	193	167	243	256	183	258	195	378	244	164	263	267	144	229	40	235	385	199	257	177	172	213	359	148	325
ID1841	LINE/L1	L1-3_BT	CATATGGTGGTTTTATTCCTAGTTTTTTAAGGAATCTCCATA	0	168	165	219	0	175	242	0	195	174	216	192	203	162	273	190	129	190	195	99	151	88	251	329	159	171	144	122	109	258	163	210
ID1842	LINE/L1	L1-3_BT	CATCAAAACAGAAAATTAATAAGGAAACACAAGTCTTAAATG	229	154	168	175	168	159	194	202	158	170	190	179	169	162	225	183	118	162	166	88	152	96	219	228	134	180	124	146	116	211	116	175
ID1843	LINE/L1	L1-3_BT	CATCAGGAATACACCTTCAGACACAGAAGTGCATGCAGAACA	135	97	101	102	108	88	106	110	76	83	106	109	96	66	144	97	75	90	101	37	99	65	114	151	82	99	89	72	100	118	85	115
ID1844	LINE/L1	L1-3_BT	CATCTCACCCTCTCCTCCCCTCTCCCCATGTCCATAAGTCTA	242	168	199	228	184	216	235	261	219	214	219	182	223	156	229	195	133	193	198	104	171	83	300	287	146	195	158	116	160	256	228	227
ID1845	LINE/L1	L1-3_BT	CATCTCCCTCCCCATCCCACCCCTCTAGGTTGATACAGAGCC	210	145	163	134	167	169	187	142	150	149	150	212	174	154	298	165	126	169	197	85	149	88	184	310	168	171	142	129	156	221	186	189
ID1846	LINE/L1	L1-3_BT	CATGAATCAGCCATAGGTATACATATATCCCCTCCCTTTTGA	0	217	222	0	0	278	332	0	179	246	263	238	0	212	432	270	204	257	248	150	227	139	229	456	274	245	166	194	229	337	211	341
ID1847	LINE/L1	L1-3_BT	CATGCAGAGGTGGAAATAAAACCACAATTGAAACCCAGGGGC	73	57	70	44	59	60	48	59	37	43	43	44	50	36	77	61	31	41	52	27	31	21	54	67	35	54	30	28	41	61	40	45
ID1848	LINE/L1	L1-3_BT	CATGGAAACTTACATTACCATATGTAAAATAGATAGCCAATG	248	144	151	95	182	155	202	111	105	146	179	115	163	136	237	158	110	158	165	84	105	65	111	257	150	164	127	118	147	239	83	215
ID1849	LINE/L1	L1-3_BT	CATGTCAATGTATGGCAAAAACCACTACAATATTGTAAAGTA	522	306	337	4021	367	396	500	4402	3252	371	419	477	380	0	2997	369	287	359	377	172	324	199	5548	3360	318	342	231	279	325	509	3901	472
ID1850	LINE/L1	L1-3_BT	CATGTGTTTGTTAGCCATCTGTATGTCTTCTTTGGAGAAATG	0	1593	1760	7544	1338	2152	8400	9463	2802	2808	1791	3130	1467	2427	3630	3619	1617	5133	2013	1491	1797	1251	8750	4837	861	3036	980	2607	900	8446	1278	5533
ID1851	LINE/L1	L1-3_BT	CATGTTACTCTTTCCATACATCTCACCCTCTCCTCCCCTCTC	268	217	255	233	224	261	274	285	246	236	259	232	255	193	347	245	169	195	233	122	204	40	346	402	187	243	190	170	221	282	240	256
ID1852	LINE/L1	L1-3_BT	CATGTTGAGGTTTGACAGAAAACAACAAAATTCTGTAAAGCA	0	372	385	417	0	425	515	0	348	393	454	399	445	364	663	407	314	398	431	208	352	271	488	625	382	412	287	312	420	503	402	516
ID1853	LINE/L1	L1-3_BT	CATGTTGAGGTTTGACAGAAAACAGCAAAATTCTGTAAAGCA	275	215	217	266	243	227	289	286	216	246	238	256	228	182	283	246	169	219	270	119	174	135	309	336	168	231	180	203	230	264	274	286
ID1854	LINE/L1	L1-3_BT	CATGTTGATGTATGGCAAAACCAATACAATATTGTAAAGTAA	4081	2749	3258	0	3426	3543	4034	0	1	3241	3349	9	3094	2964	0	3486	2451	3078	3678	1711	2968	2002	0	3	1	3463	2211	2752	3162	4112	0	3730
ID1855	LINE/L1	L1-3_BT	CATTCCATTTAGGCTGCCACAGATCAGCTGTTTCACTCTCAG	139	87	106	122	105	95	121	131	90	93	87	100	89	74	131	101	77	97	92	45	91	77	138	117	80	89	66	75	90	115	99	121
ID1856	LINE/L1	L1-3_BT	CATTCTCCAGGATAGACCACATCTTGGGTCACAAATCAAACC	193	118	134	168	128	141	186	150	135	143	143	143	160	109	185	140	92	126	155	63	138	68	196	204	104	135	95	111	100	195	86	156
ID1857	LINE/L1	L1-3_BT	CATTGCAGCACTATTTACAATAGCTAGAACATGGAAGCAACC	329	188	239	240	218	233	338	286	259	213	264	212	242	214	258	220	180	250	261	107	206	136	312	297	173	200	150	179	169	356	236	329
ID1858	LINE/L1	L1-3_BT	CATTGTTAGTATATAGAAATGCAAGTGATTTCTGTGTATTGA	269	149	202	218	182	213	241	249	198	191	206	203	186	170	214	219	140	181	204	95	157	105	228	267	185	192	142	148	132	244	147	216
ID1859	LINE/L1	L1-3_BT	CATTTGCATGGAATATATTTTTCCATCCTCTCACTTTCAGTC	216	145	154	142	167	168	206	178	162	161	177	153	180	128	183	185	101	167	195	80	131	87	199	205	123	161	109	243	126	192	90	172
ID1860	LINE/L1	L1-3_BT	CATTTGTTGTAAAGCTGGTTTGGTGGTACTGAATTCTCTTAA	0	141	157	0	0	0	188	0	139	146	167	148	0	164	192	186	119	172	159	75	139	98	184	237	132	164	116	148	124	175	100	171
ID1861	LINE/L1	L1-3_BT	CATTTTCTCCATTTTGTTTTCAAGGTTTTTGATCATCTTTAC	0	108	144	108	125	122	160	131	115	104	119	137	121	0	160	131	74	131	111	67	109	66	136	167	108	127	88	80	105	156	80	144
ID1862	LINE/L1	L1-3_BT	CCAAGCAGCTGCACCACCTCCACACCTGGCCCTCACAGGGGC	0	61	61	71	85	71	69	62	58	88	80	49	77	0	68	73	70	51	85	43	64	47	55	84	57	66	43	53	53	82	32	66
ID1863	LINE/L1	L1-3_BT	CCAATACAATATTGTAAAGTAATTAACCTCCAATTAAAATAA	0	1498	1786	0	0	0	885	0	6	0	0	35	0	1692	2	1947	0	627	2023	980	1672	1116	4	2	2	1884	1338	1598	1804	896	8	846
ID1864	LINE/L1	L1-3_BT	CCAATGGGAATTTGCTGTATGGCTCAGGAAACTCAAACAGGG	212	184	177	93	201	176	203	102	136	174	196	153	173	141	204	198	146	120	190	104	146	92	95	283	141	194	147	138	173	220	114	199
ID1865	LINE/L1	L1-3_BT	CCACAGATCAGCTGTTTCACTCTCAGCCTTAAATGTTTCTCC	139	100	99	111	104	85	127	119	91	117	95	122	94	86	129	46	97	112	103	45	95	77	132	118	57	102	84	91	97	116	101	135
ID1866	LINE/L1	L1-3_BT	CCACATCTTGGGTCACAAATCAAACCTCAGTAAATTTAAGAA	204	136	178	194	171	191	195	202	154	167	190	186	177	158	214	179	138	149	202	96	171	88	225	246	131	166	140	136	136	223	120	180
ID1867	LINE/L1	L1-3_BT	CCACATGCAGAGGTGGAAATAAAACCACAATTGAAACCCAGG	76	69	75	49	64	65	56	72	35	45	50	54	68	48	83	67	39	55	59	30	47	29	62	76	45	61	35	36	53	67	41	52
ID1868	LINE/L1	L1-3_BT	CCAGAAACTATAAAACTCTTAGAGGAAAACATAGGCAGAACA	369	257	291	303	303	299	350	332	291	283	289	290	304	283	352	308	229	279	309	149	275	194	352	441	269	289	225	212	231	349	217	309
ID1869	LINE/L1	L1-3_BT	CCAGCAATCCCACTCCTAGGCATATACCCTGAGGAAACCAAA	335	226	204	261	252	226	315	310	237	193	231	256	243	191	289	239	161	221	244	112	171	149	327	336	241	235	161	170	165	303	235	285
ID1870	LINE/L1	L1-3_BT	CCAGGATAGACCACATCTTGGGTCACAAATCAAACCTCAGTA	174	107	133	169	121	140	171	168	130	135	143	147	135	0	178	138	89	116	160	65	138	66	205	216	99	136	98	110	100	186	91	146
ID1871	LINE/L1	L1-3_BT	CCATACATCTCACCCTCTCCTCCCCTCTCCCCATGTCCATAA	287	216	229	275	225	266	265	307	260	241	272	190	257	203	270	240	161	217	238	139	189	87	362	362	162	242	178	159	200	292	251	256
ID1872	LINE/L1	L1-3_BT	CCATAGGTATACATATATCCCCTCCCTTTTGAACCTCCCTCC	227	138	149	155	173	153	218	153	87	144	173	153	161	103	231	173	117	144	145	87	129	63	142	271	155	155	111	121	132	223	137	215
ID1873	LINE/L1	L1-3_BT	CCATATGACCCAGCAATCCCACTCCTAGGCATATACCCTGAG	0	232	237	0	0	0	293	0	222	215	0	224	0	203	285	251	170	213	249	116	177	133	285	334	216	249	138	175	157	292	222	253
ID1874	LINE/L1	L1-3_BT	CCATATGTAAAATAGATAGCCAATGGGAATTTGCTGTATGGC	0	107	135	78	148	150	161	90	85	114	142	91	144	99	167	139	121	122	134	73	70	56	77	200	115	127	104	114	126	175	87	151
ID1875	LINE/L1	L1-3_BT	CCATCTCCCTCCCCATCCCACCCCTCTAGGTTGATACAGAGC	210	137	165	147	169	171	184	151	160	150	145	205	164	155	297	167	130	158	192	90	149	83	198	305	165	164	140	122	157	215	195	186
ID1876	LINE/L1	L1-3_BT	CCATGGCTGATTCATGTCAATGTATGGCAAAAACCACTACAA	0	352	392	4419	420	446	538	4568	3998	406	459	450	402	350	2844	425	327	381	415	210	339	223	6077	3421	344	369	269	345	374	512	4342	499
ID1877	LINE/L1	L1-3_BT	CCATTTTGTTTTCAAGGTTTTTGATCATCTTTACTATCATTA	0	99	121	92	123	114	147	118	115	97	123	108	117	97	161	121	76	118	109	53	110	59	106	147	99	117	86	86	96	147	80	142
ID1878	LINE/L1	L1-3_BT	CCCAAGCAGCTGCACCACCTCCACACCTGGCCCTCACAGGGG	91	60	61	71	83	70	69	65	55	81	77	56	79	68	65	75	70	48	80	41	62	47	52	81	59	65	42	53	53	81	29	63
ID1879	LINE/L1	L1-3_BT	CCCACATGCAGAGGTGGAAATAAAACCACAATTGAAACCCAG	77	68	74	48	65	65	53	68	34	41	51	50	62	48	79	64	39	52	54	31	43	29	58	69	44	60	37	38	52	63	43	50
ID1880	LINE/L1	L1-3_BT	CCCACCCCTCTAGGTTGATACAGAGCCCCTGTTTGAGTTTCC	380	243	297	181	273	288	326	190	253	257	278	328	289	253	433	284	214	260	288	144	255	174	272	448	248	275	248	217	260	378	282	346
ID1881	LINE/L1	L1-3_BT	CCCAGCAATCCCACTCCTAGGCATATACCCTGAGGAAACCAA	312	222	197	247	242	212	299	293	222	181	229	243	237	180	284	223	153	210	233	105	162	134	317	326	225	226	152	167	152	286	226	264
ID1882	LINE/L1	L1-3_BT	CCCATCCCACCCCTCTAGGTTGATACAGAGCCCCTGTTTGAG	0	226	280	0	0	0	276	0	211	222	0	324	0	213	395	245	183	220	260	135	226	119	245	436	230	255	212	190	247	338	232	299
ID1883	LINE/L1	L1-3_BT	CCCATCTCCCTCCCCATCCCACCCCTCTAGGTTGATACAGAG	225	139	170	167	170	167	200	175	167	157	153	206	165	149	307	164	132	165	193	86	142	82	223	321	174	170	144	123	163	227	213	198
ID1884	LINE/L1	L1-3_BT	CCCATTGGCTATCTATTTTACATATGGTAATGTAAGTTTCCA	248	132	147	98	175	164	204	115	103	137	180	108	162	130	214	149	103	154	148	80	102	64	111	261	155	152	128	115	149	233	88	212
ID1885	LINE/L1	L1-3_BT	CCCATTTGCATGGAATATATTTTTCCATCCTCTCACTTTCAG	187	126	131	118	131	149	172	149	141	140	165	134	156	121	162	161	97	143	167	63	118	76	162	196	109	135	90	228	116	164	79	141
ID1886	LINE/L1	L1-3_BT	CCCCATCCCACCCCTCTAGGTTGATACAGAGCCCCTGTTTGA	0	214	269	0	0	0	269	0	199	208	0	314	0	204	380	235	170	222	248	136	209	110	224	415	205	240	197	175	234	328	216	294
ID1887	LINE/L1	L1-3_BT	CCCCTCTAGGTTGATACAGAGCCCCTGTTTGAGTTTCCTGAG	0	284	325	0	0	0	371	0	256	0	0	351	0	299	452	326	0	288	326	154	295	222	279	518	279	316	268	246	290	409	302	404
ID1888	LINE/L1	L1-3_BT	CCCTCCCATCTCCCTCCCCATCCCACCCCTCTAGGTTGATAC	192	124	157	186	168	139	187	193	167	125	135	193	138	128	272	147	121	133	164	83	116	70	220	277	148	151	97	110	139	179	223	169
ID1889	LINE/L1	L1-3_BT	CCCTCCCTTTTGAACCTCCCTCCCATCTCCCTCCCCATCCCA	137	104	126	145	133	101	145	162	123	85	128	148	91	68	193	127	68	104	98	53	99	40	180	184	111	115	67	77	94	148	156	124
ID1890	LINE/L1	L1-3_BT	CCCTCTAGGTTGATACAGAGCCCCTGTTTGAGTTTCCTGAGC	401	264	296	179	299	288	346	185	227	310	322	321	280	0	413	310	242	254	308	140	283	203	262	476	251	300	247	221	270	356	276	375
ID1891	LINE/L1	L1-3_BT	CCCTCTCCCCATGTCCATAAGTCTATTCTCTATGTCTGTTTC	0	187	202	266	182	217	254	284	209	206	216	119	208	140	257	191	166	191	224	100	177	94	293	315	158	194	151	150	161	264	227	232
ID1892	LINE/L1	L1-3_BT	CCCTCTCCTCCCCTCTCCCCATGTCCATAAGTCTATTCTCTA	0	141	176	236	151	197	218	251	202	180	191	138	191	126	215	149	126	180	187	82	143	80	286	283	132	165	131	115	144	234	223	214
ID1893	LINE/L1	L1-3_BT	CCCTTTTCTCCACACCCTCTCCAGCATTTATTGTTTGTAGAC	809	484	500	827	493	569	787	741	651	566	570	578	534	497	578	597	422	573	568	302	441	271	679	861	415	555	316	554	342	774	459	579
ID1894	LINE/L1	L1-3_BT	CCTAGAGGGGTGGGATGGGGAGGGAGATGGGAGGGAGGTTCA	129	91	126	184	146	114	158	207	157	87	126	158	88	107	183	130	92	107	111	65	102	55	215	220	120	120	74	91	111	147	188	133
ID1895	LINE/L1	L1-3_BT	CCTATGGCTGATTCATGTTGAGGTTTGACAGAAAACAACAAA	472	277	300	327	355	337	466	340	273	310	351	327	350	303	502	343	251	298	352	188	282	202	376	540	367	327	225	247	326	446	360	473
ID1896	LINE/L1	L1-3_BT	CCTATTATACAGAGTGAAGTGAGTCAGAAAGAGAAAGATAAA	271	194	216	234	221	194	257	265	219	208	219	183	197	195	248	239	144	196	215	118	175	128	265	279	181	221	155	159	172	252	190	245
ID1897	LINE/L1	L1-3_BT	CCTCAACATGAATCAGCCATAGGTATACATATATCCCCTCCC	334	209	219	207	248	250	302	216	188	235	248	232	272	207	429	255	173	239	233	132	199	135	226	429	274	244	169	167	250	317	208	304
ID1898	LINE/L1	L1-3_BT	CCTCAATACATAAGACAAACACTAACAGACATAAAAGGAGAA	217	137	165	180	186	175	202	183	73	185	192	166	191	170	176	181	130	155	199	87	153	117	200	225	135	158	119	130	111	206	109	166
ID1899	LINE/L1	L1-3_BT	CCTCAGAATGGGAGAAAATAATAGCAAATGAAACAACTGACA	383	309	332	370	332	334	364	425	305	316	341	359	332	275	385	321	261	293	364	172	282	188	425	481	301	351	230	253	222	384	285	328
ID1900	LINE/L1	L1-3_BT	CCTCTAGGTTGATACAGAGCCCCTGTTTGAGTTTCCTGAGCC	416	276	307	203	318	298	349	216	256	317	342	338	293	281	447	326	258	260	319	144	302	217	294	503	273	308	273	234	273	371	299	379
ID1901	LINE/L1	L1-3_BT	CCTGAAAAAGAATTCAGAATAATGATAGTAAAGATGATCAAA	187	122	131	152	141	158	183	169	120	142	156	141	146	109	182	148	98	125	145	63	124	89	144	197	121	129	112	105	120	167	97	186
ID1902	LINE/L1	L1-3_BT	CCTGAGCCATACAGCAAATTCCCATTGGCTATCTATTTTACA	189	125	158	89	166	177	179	109	105	131	174	121	159	119	187	162	133	138	145	82	90	72	87	249	142	146	116	130	135	190	104	172
ID1903	LINE/L1	L1-3_BT	CCTGGAGAATGTTCCATGTGCACTTGAGAAGAAGGTGTATTC	171	117	134	131	117	108	164	137	119	116	137	129	121	83	142	144	72	114	128	63	96	71	152	195	101	121	80	88	83	147	74	135
ID1904	LINE/L1	L1-3_BT	CCTGTTTGAGTTTCCTGAGCCATACAGCAAATTCCCATTGGC	0	174	183	0	0	0	215	0	139	175	0	161	0	143	205	202	150	132	190	108	140	93	101	275	138	186	148	144	169	219	116	208
ID1905	LINE/L1	L1-3_BT	CCTTATTAATTTTCTGTTTTGATGATCTGTCCATTGGTGTGA	210	133	180	168	145	150	190	196	148	163	173	159	166	124	199	181	110	157	173	89	122	105	221	232	132	154	112	135	117	218	113	167
ID1906	LINE/L1	L1-3_BT	CCTTCTTCTCAAGTGCACATGGAACATTCTCCAGGATAGACC	0	98	117	118	111	110	152	112	110	102	128	113	116	79	132	127	73	107	116	50	94	59	149	181	91	107	79	91	71	159	79	130
ID1907	LINE/L1	L1-3_BT	CCTTGAAAACAAAATGGAGAAAATGCAAGAATCAATTAACAA	210	119	132	119	135	134	162	143	122	128	149	138	133	120	154	143	90	138	136	81	117	80	149	166	114	143	98	113	113	155	99	154
ID1908	LINE/L1	L1-3_BT	CCTTGCTTCCATGGCTGCCTGGCTTTCCTCCACAGGCATTTC	93	65	69	48	81	83	69	69	50	72	66	58	63	76	62	67	77	49	57	32	60	53	69	73	40	67	53	60	61	72	62	69
ID1909	LINE/L1	L1-3_BT	CCTTTTTATGGCTGAGTAATATTCCATTGTGTATATGTACCA	279	163	190	249	181	178	250	272	201	209	203	162	241	158	302	195	140	150	211	83	206	139	279	335	184	177	150	153	129	260	208	225
ID1910	LINE/L1	L1-3_BT	CTAAAGACACATATAGACTGAAAGTGAGAGGATGGAAAAATA	134	74	86	85	89	98	118	95	82	104	94	93	82	76	102	102	69	106	106	40	76	46	114	121	68	84	80	168	66	122	67	100
ID1911	LINE/L1	L1-3_BT	CTAAATGTAAGACCAGAAACTATAAAACTCTTAGAGGAAAAC	399	268	296	319	290	313	405	343	306	303	325	294	320	284	367	319	232	292	325	148	288	189	369	475	303	310	219	337	203	372	246	335
ID1912	LINE/L1	L1-3_BT	CTAATTTCATTCTTTTACATGTAGCTGTCCAGTTTTCCCAGC	368	237	287	259	301	286	359	301	270	271	261	226	292	215	319	271	206	282	280	133	211	147	303	390	231	245	208	198	190	356	213	299
ID1913	LINE/L1	L1-3_BT	CTACAAACAATAAATGCTGGAGAGGGTGTGGAGAAAAGGGAA	0	594	615	941	583	681	900	873	790	653	679	685	638	578	686	729	500	644	671	347	531	337	785	1003	489	665	379	634	426	899	549	663
ID1914	LINE/L1	L1-3_BT	CTACATAATGATCAAGGGATCAATCCAAGAGGAAGACATAAC	197	116	143	132	131	140	168	151	120	122	144	131	149	75	143	134	68	142	127	64	118	51	175	182	99	132	82	77	87	174	77	155
ID1915	LINE/L1	L1-3_BT	CTAGAAACACAGAAGTCCAAATAAATGAAGAGGAAATAGGCA	176	118	129	138	134	122	170	147	125	122	142	117	121	96	157	136	70	140	125	69	111	78	103	137	110	118	101	83	107	161	98	156
ID1916	LINE/L1	L1-3_BT	CTAGAACCTATTATACAGAGTGAAGTGAGTCAGAAAGAGAAA	270	204	217	224	226	228	245	254	216	200	227	178	219	183	240	249	143	195	211	114	191	119	252	243	188	233	161	154	193	263	199	231
ID1917	LINE/L1	L1-3_BT	CTAGAGGGGTGGGATGGGGAGGGAGATGGGAGGGAGGTTCAA	0	96	132	0	0	0	160	0	169	0	0	157	0	107	192	140	0	108	118	69	116	54	197	226	119	126	75	99	117	157	191	135
ID1918	LINE/L1	L1-3_BT	CTAGGTTGATACAGAGCCCCTGTTTGAGTTTCCTGAGCCATA	434	287	325	146	325	304	351	136	205	323	364	324	335	265	447	342	248	258	319	156	295	193	162	508	276	319	259	227	285	386	187	383
ID1919	LINE/L1	L1-3_BT	CTAGGTTGCTTCCATGTTCTAGCTATTGTAAATAGTGCTGCA	427	282	333	358	322	362	468	396	366	321	366	306	348	312	382	308	284	333	356	152	296	229	445	448	281	293	254	303	249	448	333	424
ID1920	LINE/L1	L1-3_BT	CTATCTATTTTACATATGGTAATGTAAGTTTCCATGTTACTC	0	271	283	0	0	0	434	0	223	297	0	214	0	238	474	305	236	295	322	175	258	104	301	492	282	296	239	254	295	459	177	397
ID1921	LINE/L1	L1-3_BT	CTATGGCTGATTCATGTTGAGGTTTGACAGAAAACAACAAAA	0	294	315	344	386	360	490	347	283	337	369	335	375	331	542	363	276	322	387	201	293	219	386	573	396	346	251	285	351	464	371	500
ID1922	LINE/L1	L1-3_BT	CTATGTCTGTTTCTCCATTGCTGCCCTGTAAATAAATTCTTC	155	90	92	147	100	121	150	168	140	127	128	101	133	95	150	102	115	108	130	49	116	75	175	205	92	101	69	93	85	159	133	130
ID1923	LINE/L1	L1-3_BT	CTATTCTCTATGTCTGTTTCTCCATTGCTGCCCTGTAAATAA	125	100	92	134	107	116	131	149	135	102	101	86	125	0	156	102	84	101	128	56	99	62	184	199	89	96	63	71	78	155	133	123
ID1924	LINE/L1	L1-3_BT	CTATTTACAATAGCTAGAACATGGAAGCAACCTAGATGTCCA	0	269	334	0	0	350	449	0	353	326	371	307	324	316	379	325	280	335	359	151	288	235	429	472	268	286	300	316	257	449	312	404
ID1925	LINE/L1	L1-3_BT	CTATTTTACATATGGTAATGTAAGTTTCCATGTTACTCTTTC	0	251	247	0	0	0	394	0	200	270	0	197	0	215	408	264	197	270	298	153	247	77	287	432	235	272	215	202	241	399	171	361
ID1926	LINE/L1	L1-3_BT	CTCAATACATAAGACAAACACTAACAGACATAAAAGGAGAAA	233	128	167	195	186	187	214	188	75	185	198	174	201	167	184	188	134	167	207	84	161	117	202	238	144	154	123	128	124	218	110	172
ID1927	LINE/L1	L1-3_BT	CTCACACCAATGGACAGATCATCAAAACAGAAAATTAATAAG	204	131	170	152	144	148	186	182	141	147	159	148	161	115	185	178	112	151	163	88	121	108	207	216	130	154	99	138	118	212	104	159
ID1928	LINE/L1	L1-3_BT	CTCACCCTCTCCTCCCCTCTCCCCATGTCCATAAGTCTATTC	0	167	209	0	0	0	245	0	228	213	0	182	0	159	234	191	141	204	192	100	172	91	329	308	140	190	156	129	167	257	248	234
ID1929	LINE/L1	L1-3_BT	CTCACTTCACTCTGTATAATAGGTTCTAGGTTCATCCACCTC	232	157	153	159	175	156	217	202	186	161	185	174	178	174	211	190	121	151	167	88	144	97	230	194	145	170	125	133	147	226	167	206
ID1930	LINE/L1	L1-3_BT	CTCAGAATGGGAGAAAATAATAGCAAATGAAACAACTGACAA	0	321	343	0	0	0	396	0	333	339	0	374	0	298	415	336	286	332	384	180	313	221	459	505	328	362	252	269	244	419	312	353
ID1931	LINE/L1	L1-3_BT	CTCAGATTCTAATCTGGTCCTACTCCTGTGTGTTCTTGCCTC	96	66	63	33	53	55	83	46	39	59	53	65	61	0	83	55	46	58	63	25	51	38	57	101	42	55	51	32	51	87	31	69
ID1932	LINE/L1	L1-3_BT	CTCAGCTGGTGTTCTGCATGCACTTCTGTGTCTGAAGGTGTA	135	101	107	75	103	70	110	91	68	102	126	107	110	79	138	104	82	94	115	45	97	91	85	142	91	100	93	78	100	128	65	107
ID1933	LINE/L1	L1-3_BT	CTCATTCCATTTAGGCTGCCACAGATCAGCTGTTTCACTCTC	142	91	110	118	109	101	117	128	91	91	91	100	99	77	129	104	82	103	96	49	83	78	134	119	81	93	66	73	99	111	105	120
ID1934	LINE/L1	L1-3_BT	CTCCAAAGAAGACATACAGATGGCTAACAAACACATGAAAAG	7224	1647	1769	7489	1371	2182	8581	9543	2855	2864	1820	1980	1465	2520	3816	3643	1692	5347	2093	1530	1860	1300	8849	5201	903	3035	991	2663	942	8585	1318	5562
ID1935	LINE/L1	L1-3_BT	CTCCAGGATAGACCACATCTTGGGTCACAAATCAAACCTCAG	180	112	134	166	127	136	179	167	139	136	140	147	143	110	179	132	88	117	155	64	138	68	199	211	97	137	97	104	102	189	87	148
ID1936	LINE/L1	L1-3_BT	CTCCCATCTCCCTCCCCATCCCACCCCTCTAGGTTGATACAG	207	140	172	182	180	163	198	199	175	144	151	204	164	143	291	167	130	159	195	87	128	82	234	305	169	175	130	120	160	207	234	185
ID1937	LINE/L1	L1-3_BT	CTCCCCATGTCCATAAGTCTATTCTCTATGTCTGTTTCTCCA	0	184	213	0	0	239	273	0	236	226	232	130	0	157	292	191	168	210	246	99	205	116	325	328	174	194	165	170	167	297	240	254
ID1938	LINE/L1	L1-3_BT	CTCCTCCCCTCTCCCCATGTCCATAAGTCTATTCTCTATGTC	212	164	183	235	160	197	222	259	207	181	195	136	200	124	225	159	127	181	202	79	131	81	279	272	128	183	130	116	146	243	227	218
ID1939	LINE/L1	L1-3_BT	CTCTAGGTTGATACAGAGCCCCTGTTTGAGTTTCCTGAGCCA	440	294	319	213	335	315	361	230	273	335	365	346	321	299	452	342	269	273	327	154	319	222	290	514	288	322	286	243	290	384	307	390
ID1940	LINE/L1	L1-3_BT	CTCTCAGCCTTAAATGTTTCTCCTCTGACTCAGACAATTGCC	114	83	84	84	86	79	106	84	79	100	86	68	83	0	116	52	63	85	98	43	76	56	100	99	55	77	65	72	71	105	80	97
ID1941	LINE/L1	L1-3_BT	CTCTCCCCATGTCCATAAGTCTATTCTCTATGTCTGTTTCTC	247	194	210	275	188	236	261	299	230	227	224	121	212	149	278	200	183	199	231	102	193	109	314	320	176	196	158	172	170	270	234	240
ID1942	LINE/L1	L1-3_BT	CTGAAAAAGAATTCAGAATAATGATAGTAAAGATGATCAAAA	200	130	138	162	149	171	190	181	129	150	170	149	163	118	196	161	105	137	154	67	135	95	156	201	139	137	117	111	125	180	101	196
ID1943	LINE/L1	L1-3_BT	CTGACTCACTTCACTCTGTATAATAGGTTCTAGGTTCATCCA	247	174	172	185	193	191	242	227	199	178	200	208	210	195	227	221	130	182	194	110	173	113	237	222	166	196	150	144	167	250	179	222
ID1944	LINE/L1	L1-3_BT	CTGAGTCAGAGGAGAAACATTTAAGGCTGAGAGTGAAACAGC	151	104	124	106	111	101	150	123	112	142	115	127	115	107	148	59	111	111	138	55	107	90	123	154	90	110	87	99	112	138	110	143
ID1945	LINE/L1	L1-3_BT	CTGATTCTCATTCCATTTAGGCTGCCACAGATCAGCTGTTTC	176	117	133	113	149	144	147	129	112	115	105	120	118	99	170	145	103	131	112	61	107	89	153	149	94	122	96	95	129	149	121	149
ID1946	LINE/L1	L1-3_BT	CTGCACCACCTCCACACCTGGCCCTCACAGGGGCAAACCCAA	88	63	65	53	79	74	79	60	45	66	74	64	92	55	83	69	63	55	87	35	70	36	61	77	58	65	45	45	55	80	28	66
ID1947	LINE/L1	L1-3_BT	CTGCATGCACTTCTGTGTCTGAAGGTGTATTCCTGATGTATC	138	97	102	88	106	93	115	102	85	99	97	105	105	62	131	101	62	94	106	42	94	65	112	134	83	96	92	60	104	129	88	125
ID1948	LINE/L1	L1-3_BT	CTGCCACAGATCAGCTGTTTCACTCTCAGCCTTAAATGTTTC	140	96	96	104	101	86	130	115	90	113	86	117	93	89	132	49	92	108	100	42	99	69	130	120	59	96	78	81	93	118	103	133
ID1949	LINE/L1	L1-3_BT	CTGCCCCTGGGTTTCAATTGTGGTTTTATTTCCACCTCTGCA	75	57	70	44	55	56	49	60	46	40	45	45	52	37	76	60	30	55	51	25	36	24	54	70	37	61	30	32	44	63	38	48
ID1950	LINE/L1	L1-3_BT	CTGCCCTGTAAATAAATTCTTCAGTACCATTTTTCTAGATTC	150	137	138	171	160	139	172	179	147	145	156	102	144	118	194	156	118	143	157	66	129	104	214	227	111	145	106	115	121	166	168	143
ID1951	LINE/L1	L1-3_BT	CTGCTCTTCAGAAGTTATTTCCACCATTTTATCTTCCAGCTC	0	141	164	164	170	168	163	0	164	150	155	160	163	121	185	170	89	130	155	76	124	94	196	231	133	148	115	126	134	185	109	157
ID1952	LINE/L1	L1-3_BT	CTGGGAAAACTGGACAGCTACATGTAAAAGAATGAAATTAGA	415	261	310	282	331	326	385	328	286	299	289	247	316	235	349	299	239	308	303	150	245	167	327	418	262	273	224	232	216	395	233	329
ID1953	LINE/L1	L1-3_BT	CTGGGTCATATGGTGGTTTTATTCCTAGTTTTTTAAGGAATC	231	168	181	214	193	189	230	247	172	171	205	184	184	159	276	203	137	198	182	112	148	103	244	337	181	174	143	122	110	242	171	213
ID1954	LINE/L1	L1-3_BT	CTGTATAATAGGTTCTAGGTTCATCCACCTCATTAGAACTGA	182	146	149	156	170	107	171	183	145	162	145	127	151	143	186	176	121	133	169	74	127	80	205	199	139	161	97	118	115	170	153	157
ID1955	LINE/L1	L1-3_BT	CTGTATGGCTCAGGAAACTCAAACAGGGGCTCTGTATCAACC	397	283	310	125	315	307	329	124	196	300	339	301	320	240	407	322	222	233	301	154	285	181	137	475	246	303	241	213	273	349	158	346
ID1956	LINE/L1	L1-3_BT	CTGTTTCACTCTCAGCCTTAAATGTTTCTCCTCTGACTCAGA	0	111	124	0	0	104	150	0	119	149	122	130	0	115	153	61	111	112	142	57	109	92	127	161	96	118	89	99	118	136	117	146
ID1957	LINE/L1	L1-3_BT	CTTAAAAAACTAGGAATAAAACCACCATATGACCCAGCAATC	235	168	192	222	183	196	229	259	181	166	213	173	177	162	275	199	125	189	179	105	161	106	271	325	163	178	150	124	113	242	177	219
ID1958	LINE/L1	L1-3_BT	CTTAAATTTACTGAGGTTTGATTTGTGACCCAAGATGTGGTC	0	133	170	182	163	182	187	188	147	154	179	172	168	155	206	171	127	130	188	89	162	86	206	239	121	165	131	135	129	207	112	171
ID1959	LINE/L1	L1-3_BT	CTTAGCCACACTGCCCCTGGGTTTCAATTGTGGTTTTATTTC	89	67	76	58	70	71	76	66	47	54	63	67	65	59	99	72	45	68	60	31	43	38	58	90	51	66	44	54	57	84	37	76
ID1960	LINE/L1	L1-3_BT	CTTCAGAAGTTATTTCCACCATTTTATCTTCCAGCTCACTGA	0	141	167	0	0	0	175	0	179	151	0	165	0	122	210	171	90	134	152	82	137	98	209	235	139	151	127	126	137	187	116	162
ID1961	LINE/L1	L1-3_BT	CTTCAGATATTCTGCTATTGATTCCTTCTAGAGTATTTTTAA	0	118	143	0	0	109	182	0	122	146	141	155	0	114	177	149	100	156	167	67	134	86	172	192	106	127	115	139	132	184	109	191
ID1962	LINE/L1	L1-3_BT	CTTCATTTATTTGGACTTCTGTGTTTCTAGTTTGTTCCTTCA	198	130	144	146	173	158	190	163	140	145	151	136	148	112	183	167	98	147	133	80	124	93	127	171	115	139	112	108	127	185	101	162
ID1963	LINE/L1	L1-3_BT	CTTCCTTAGCCACACTGCCCCTGGGTTTCAATTGTGGTTTTA	0	59	81	63	69	63	84	0	52	58	58	68	65	55	107	67	46	77	60	25	45	42	62	82	50	62	47	50	56	92	41	83
ID1964	LINE/L1	L1-3_BT	CTTCTTCTCAAGTGCACATGGAACATTCTCCAGGATAGACCA	0	109	126	0	0	0	167	0	125	0	0	123	0	89	155	135	0	122	125	51	103	73	167	195	104	119	92	103	82	177	94	148
ID1965	LINE/L1	L1-3_BT	CTTGAAAACAAAATGGAGAAAATGCAAGAATCAATTAACAAA	221	133	144	130	148	150	173	164	128	136	160	149	152	133	170	156	96	148	145	89	129	92	159	182	128	155	113	119	126	167	104	165
ID1966	LINE/L1	L1-3_BT	CTTGCTTCCATGGCTGCCTGGCTTTCCTCCACAGGCATTTCC	105	67	73	47	82	84	75	70	50	67	69	60	61	75	73	68	81	51	57	34	62	50	72	74	40	70	53	63	66	77	59	76
ID1967	LINE/L1	L1-3_BT	CTTGGGTCACAAATCAAACCTCAGTAAATTTAAGAAAATTGA	192	130	167	174	154	181	186	198	151	143	166	171	171	132	206	161	116	151	191	73	150	88	206	227	123	156	130	122	115	192	94	176
ID1968	LINE/L1	L1-3_BT	CTTGGGTTTGCCCCTGTGAGGGCCAGGTGTGGAGGTGGTGCA	87	57	60	52	73	72	74	59	41	64	78	67	85	53	84	60	56	58	84	33	67	39	61	76	56	59	42	41	52	79	30	62
ID1969	LINE/L1	L1-3_BT	CTTTACAATATTGTAGTGGTTTTTGCCATACATTGACATGAA	0	303	337	4073	0	388	502	0	3232	371	415	468	381	299	2912	364	294	356	380	166	325	199	5573	3344	314	338	231	288	316	505	3853	477
ID1970	LINE/L1	L1-3_BT	CTTTACAGAATTTTGCTGTTTTCTGTCAAACCTCAACATGAA	0	211	212	271	234	224	292	273	219	242	237	253	220	183	286	233	169	222	271	117	180	120	314	336	161	232	182	199	228	264	260	282
ID1971	LINE/L1	L1-3_BT	CTTTACAGAATTTTGTTGTTTTCTGTCAAACCTCAACATGAA	584	369	380	412	427	440	544	396	355	399	455	399	456	366	655	413	300	402	433	218	355	254	487	644	385	416	286	305	424	520	413	547
ID1972	LINE/L1	L1-3_BT	CTTTATCCATTCATCTGTTGATGGACATCTAGGTTGCTTCCA	256	176	185	225	176	201	236	239	195	211	209	196	194	211	234	182	193	196	239	111	186	157	237	270	174	179	153	213	133	238	192	229
ID1973	LINE/L1	L1-3_BT	CTTTCCATACATCTCACCCTCTCCTCCCCTCTCCCCATGTCC	261	175	197	225	190	216	240	269	225	200	221	186	218	0	273	194	124	174	202	109	165	47	332	346	165	191	159	135	179	247	227	235
ID1974	LINE/L1	L1-3_BT	CTTTCTCTTTCTGACTCACTTCACTCTGTATAATAGGTTCTA	265	199	220	221	220	223	247	259	216	204	230	175	214	184	244	240	135	196	212	108	181	120	252	250	181	231	163	151	182	255	195	230
ID1975	LINE/L1	L1-3_BT	CTTTCTGACTCACTTCACTCTGTATAATAGGTTCTAGGTTCA	261	193	192	203	212	201	238	242	213	195	215	209	209	206	241	233	145	194	226	107	191	125	240	242	179	218	171	160	174	276	199	222
ID1976	LINE/L1	L1-3_BT	CTTTGTTAATTGATTCTTGCATTTTCTCCATTTTGTTTTCAA	214	133	141	131	149	154	171	166	132	131	150	140	152	134	180	155	97	145	147	90	128	95	158	198	126	155	115	122	123	162	103	155
ID1977	LINE/L1	L1-3_BT	CTTTTATGTCTGTTAGTGTTTGTCTTATGTATTGAGGTGCTC	0	123	153	139	146	151	168	145	85	159	160	135	156	147	158	164	106	125	167	77	122	102	165	203	124	145	92	107	96	170	91	138
ID1978	LINE/L1	L1-3_BT	CTTTTCAGACAAGCAAAAGTTAAGAGAATTCAGTACCACCAA	0	129	136	0	0	0	190	0	154	0	0	135	0	122	160	162	0	160	160	72	131	79	190	215	120	158	114	121	105	186	95	174
ID1979	LINE/L1	L1-3_BT	GAAAAAGAATTCAGAATAATGATAGTAAAGATGATCAAAAAC	182	122	126	133	144	145	165	145	110	128	151	134	136	109	181	153	91	118	148	63	114	85	135	183	126	133	104	98	113	166	95	171
ID1980	LINE/L1	L1-3_BT	GAAAACAAAATGGAGAAAATGCAAGAATCAATTAACAAAGAC	189	126	136	123	144	139	157	153	116	119	138	130	139	116	157	146	84	128	129	81	113	90	147	190	118	141	99	107	115	140	93	134
ID1981	LINE/L1	L1-3_BT	GAAAACAACAAAATTCTGTAAAGCAATTATCCTTCAATAAAA	358	219	235	257	244	276	349	292	219	239	277	253	297	212	436	241	205	272	290	112	229	150	300	379	252	233	200	192	255	366	260	340
ID1982	LINE/L1	L1-3_BT	GAAAACAACAAAATTCTGTAAAGCAATTATCCTTCAATTAAA	419	311	299	336	334	338	411	336	279	328	337	331	339	257	433	321	260	325	331	150	278	212	347	402	289	324	258	256	290	398	323	392
ID1983	LINE/L1	L1-3_BT	GAAAACAGCAAAATTCTGTAAAGCAATTATCCTTCAATAAAA	267	190	198	237	227	223	245	270	203	210	220	228	248	182	301	211	175	203	209	100	184	135	267	334	192	199	174	158	208	265	228	265
ID1984	LINE/L1	L1-3_BT	GAAAACTGGACAGCTACATGTAAAAGAATGAAATTAGAACAC	0	243	284	247	0	280	331	0	249	275	275	238	264	0	302	271	214	288	279	132	236	154	316	368	242	245	198	220	188	363	198	282
ID1985	LINE/L1	L1-3_BT	GAAAAGACAACCCTCAGAATGGGAGAAAATAATAGCAAATGA	332	235	276	302	298	261	347	329	246	254	286	313	262	212	316	267	210	238	274	150	226	146	366	394	217	279	188	201	180	346	236	294
ID1986	LINE/L1	L1-3_BT	GAAAATAATAGCAAATGAAACAACTGACAAAGGATTAATTTC	457	334	388	392	372	370	432	432	359	361	372	383	373	314	432	380	305	356	396	196	314	251	461	547	327	376	259	293	252	441	282	365
ID1987	LINE/L1	L1-3_BT	GAAAATGCAAGAATCAATTAACAAAGACCTAGAAGAATTAAA	198	148	166	155	172	162	194	183	146	151	158	153	152	119	188	181	94	144	162	94	136	110	194	203	145	160	113	127	135	173	122	179
ID1988	LINE/L1	L1-3_BT	GAAAATTAATAAGGAAACACAAGTCTTAAATGATACATTAGA	210	129	156	148	162	154	168	181	127	150	148	167	171	163	229	173	98	153	148	84	139	84	206	205	139	156	116	114	105	192	106	171
ID1989	LINE/L1	L1-3_BT	GAAACACAAGTCTTAAATGATACATTAGATGAGATGGATCTC	0	152	159	144	171	159	169	153	120	151	147	141	150	130	189	184	113	137	156	83	131	85	183	193	120	182	102	120	108	162	96	151
ID1990	LINE/L1	L1-3_BT	GAAACCAACACAACATTGTAAAGCAATTATCCTCCAATTAAA	185	107	122	94	145	160	181	103	104	133	149	124	150	107	195	131	100	105	159	58	124	82	141	195	71	66	101	99	125	194	76	177
ID1991	LINE/L1	L1-3_BT	GAAACTCAAACAGGGGCTCTGTATCAACCTAGAGGGGTGGGA	341	224	275	174	250	277	286	175	218	245	245	297	273	227	406	260	194	244	269	137	239	150	247	413	224	250	225	193	252	357	242	307
ID1992	LINE/L1	L1-3_BT	GAAACTTACATTACCATATGTAAAATAGATAGCCAATGGGAA	260	140	157	104	187	170	218	123	117	154	183	116	178	0	230	158	107	176	162	83	108	70	124	261	157	164	138	127	157	246	95	229
ID1993	LINE/L1	L1-3_BT	GAAAGTGAGAGGATGGAAAAATATATTCCATGCAAATGGGAA	200	135	143	134	143	158	182	162	146	148	173	152	166	121	186	174	99	145	171	70	130	81	176	208	113	146	94	237	116	176	79	145
ID1994	LINE/L1	L1-3_BT	GAAATAACTTCTGAAGAGCAGAATAAAGTAAAAAGAATGAAA	243	164	170	172	182	209	206	205	184	195	186	195	204	140	222	177	126	182	228	92	168	117	234	232	151	166	140	145	153	233	138	213
ID1995	LINE/L1	L1-3_BT	GAACAAACTAGAAACACAGAAGTCCAAATAAATGAAGAGGAA	196	133	145	150	159	144	190	161	147	140	149	133	132	107	172	155	89	147	137	77	110	77	167	163	106	133	123	103	112	189	113	173
ID1996	LINE/L1	L1-3_BT	GAACATATATATCAATAATTACTTTAAATGTAAATGGATTAA	204	124	142	135	132	172	183	153	138	133	138	137	175	123	150	145	124	145	130	77	113	79	174	180	100	130	127	120	97	181	88	173
ID1997	LINE/L1	L1-3_BT	GAACATTCTCCAGGATAGACCACATCTTGGGTCACAAATCAA	227	149	166	193	156	165	216	186	161	159	166	149	176	0	192	175	101	138	185	76	151	81	225	213	112	174	100	134	125	220	109	186
ID1998	LINE/L1	L1-3_BT	GAAGAATACACCTTCTTCTCAAGTGCACATGGAACATTCTCC	147	110	120	122	111	108	154	137	111	105	121	116	109	76	135	141	69	115	119	53	88	61	147	182	94	115	72	79	70	141	75	120
[truncated: 36,453 more rows]
