# Supplementary material
Source: HighWire-hosted journal article supplement (doi:10.1101/gr.281289.125)
Supplement: Supplemental_Table_S1.xlsx [file Supplemental_Table_S1.xlsx]

## Sheet: Table S1
Table S1: Genome assembly and sample information for the 32 ruminant species
Family	Subfamily	Species	N50
Antilocapridae	Antilocapridae	Pronghorn	1463792
Giraffidae	Giraffidae	Okapi	3620116
Giraffidae	Giraffidae	Giraffe	2996846
Cervidae	Capreolinae	WhiteTailedDeer	850721
Cervidae	Cervinae	Milu	3039716
Cervidae	Muntiacinae	BlackMuntjac	1301506
Cervidae	Muntiacinae	ChineseMuntjac	1105497
Cervidae	Hydropotinae	ChineseWaterDeer	5728854
Moschidae	Moschidae	ForestMuskDeer	2509225
Bovidae	Bovinae	AfricanBuffalo	2316376
Bovidae	Bovinae	Cattle	103308737
Bovidae	Bovinae	Yak	1407960
Bovidae	Bovinae	WaterBuffalo	116997125
Bovidae	Bovinae	GreaterKudu	511483
Bovidae	Aepycerotinae	Impala	344476
Bovidae	Antilopinae	Suni	952090
Bovidae	Antilopinae	KirksDikdik	27729
Bovidae	Antilopinae	ThomsonGazelle	1581717
Bovidae	Antilopinae	GrantGazelle	528456
Bovidae	Antilopinae	Gerenuk	3126223
Bovidae	Cephalophinae	HarveyDuiker	365462
Bovidae	Cephalophinae	CommonDuiker	583330
Bovidae	Reduncinae	DefassaWaterbuck	779552
Bovidae	Hippotraginae	Gemsbok	1476553
Bovidae	Alcelaphinae	BlueWildebeest	366224
Bovidae	Pantholopinae	TibetanAntelope	2772860
Bovidae	Capridae	Argali	5492388
Bovidae	Capridae	Sheep	101274418
Bovidae	Capridae	BarbarySheep	1301762
Bovidae	Capridae	BlueSheep	21385
Bovidae	Capridae	Ibex	61905114
Bovidae	Capridae	Goat	87277232
