# Supplementary material
Source: HighWire-hosted journal article supplement (doi:10.1101/gr.281289.125)
Supplement: Supplemental_Table_S2.xlsx [file Supplemental_Table_S2.xlsx]

## Sheet: Table S2
Table S2: Catalog and domain structure of all KZFPs
GeneName	Isoforms ID	KRAB (Count)	C2H2 (Count)	SCAN (Count)
ZNF263	ENST00000219069	1	9	1
ZNF688	ENST00000223459	1	2	0
ZNF624	ENST00000311331	1	21	0
ZNF436	ENST00000314011	1	12	0
ZNF671	ENST00000317398	1	3	0
ZKSCAN8	ENST00000330236	1	9	1
ZNF140	ENST00000355557	1	10	0
ZFP69	ENST00000372706	2	10	1
ZNF566	ENST00000392170	1	9	0
ZSCAN25	ENST00000394152	1	7	1
ZNF484	ENST00000395505	1	18	0
ZSCAN29	ENST00000396976	0	6	1
ZFP69B	ENST00000411995	2	10	1
ZNF783	ENST00000434415	1	4	0
ZNF527	ENST00000436120	1	13	0
ZNF746	ENST00000458143	1	4	0
ZNF398	ENST00000475153	1	8	0
ZNF641	ENST00000544117	1	5	0
ZSCAN29	ENST00000568898	0	6	1
ZFP90	ENST00000570495	1	13	0
ZNF205	ENST00000570935	1	2	0
ZNF282	ENST00000610704	1	5	0
ZNF75A	ENST00000669516	1	5	1
PEG3	NM_001002887.2	0	6	1
ZNF746	NM_001035341.1	1	4	0
ZNF621	NM_001075931.1	1	6	0
ZNF45	NM_001076213.1	1	18	0
ZNF135	NM_001076816.1	1	16	0
LOC509810	NM_001077894.2	1	13	0
ZNF394	NM_001077955.1	1	11	1
ZNF688	NM_001081625.2	1	2	0
ZNF19	NM_001083460.2	1	10	0
ZNF200	NM_001083700.2	1	5	0
ZNF689	NM_001083746.2	1	12	0
ZNF677	NM_001102092.2	1	9	0
LOC100124497	NM_001102541.1	1	15	0
ZNF165	NM_001191376.1	0	7	1
ZNF248	NM_001191482.1	1	10	0
ZNF24	NM_001205479.1	0	4	1
ZNF263	NM_001205513.2	1	9	1
ZNF449	NM_001205714.1	0	7	1
ZNF398	NM_001205918.2	1	8	0
ZNF18	NM_001206494.1	1	5	1
ZKSCAN7	NM_001206812.1	2	13	1
ZNF354A	NM_001256565.1	1	14	0
LOC100336984	NM_001319887.1	2	22	0
PRDM9	NM_001319897.2	1	8	0
LOC506408	XM_002687138.4	1	14	0
ZNF641	XM_002687345.6	1	5	0
ZNF317	XM_002688767.3	1	14	0
LOC783540	XM_002688775.6	1	18	0
ZNF202	XM_002693090.6	1	8	1
ZNF214	XM_002693140.5	1	12	0
ZNF461	XM_002694949.6	2	15	0
ZNF175	XM_002695231.6	1	16	0
LOC616720	XM_002695334.6	2	28	0
LOC100140915	XM_002695473.6	1	12	0
LOC530973	XM_002695492.6	1	12	0
ZNF584	XM_002695511.5	1	8	0
ZFP37	XM_003586435.5	2	13	0
LOC790009	XM_003587353.5	1	12	0
ZNF394	XM_004021046.5	1	10	1
ZSCAN20	XM_005204939.4	0	10	1
ZNF212	XM_005205934.2	2	3	0
ZNF93	XM_005208410.4	1	13	0
ZNF333	XM_005208601.4	2	3	0
ZNF177	XM_005208645.4	1	11	0
ZNF169	XM_005210455.4	1	13	0
ZNF189	XM_005210479.4	1	16	0
ZNF215	XM_005216117.4	1	4	1
ZNF268	XM_005217646.4	1	24	0
ZNF140	XM_005217704.4	1	11	0
ZNF74	XM_005218210.4	1	12	0
ZFP90	XM_005218864.4	1	13	0
ZNF23	XM_005218878.4	1	17	0
ZNF570	XM_005218896.4	1	11	0
ZNF382	XM_005218947.4	1	11	0
ZNF527	XM_005218995.4	1	13	0
ZNF829	XM_005219093.4	1	11	0
ZNF283	XM_005219418.4	1	9	0
LOC100847180	XM_005219601.4	2	31	0
ZNF304	XM_005219788.4	1	16	0
ZNF274	XM_005219792.4	2	5	1
ZNF8	XM_005219795.4	1	7	0
ZNF8	XM_005219796.4	1	7	0
ZNF543	XM_005219811.4	1	9	0
LOC527186	XM_005219813.4	1	9	0
ZNF154	XM_005219821.4	1	29	0
LOC100139325	XM_005219825.4	1	27	0
LOC789960	XM_005219828.4	2	5	0
LOC100847773	XM_005219833.4	1	9	0
ZSCAN26	XM_005223720.4	0	8	1
ZNF397	XM_005223962.4	0	10	1
ZSCAN30	XM_005224007.4	0	7	1
ZNF12	XM_005225076.4	1	16	0
ZSCAN21	XM_005225134.3	0	7	1
ZNF41	XM_005228169.4	1	18	0
LOC101902100	XM_005228311.1	1	5	0
LOC102184668	XM_005675738.3	1	12	0
ZSCAN20	XM_005678735.3	0	10	1
LOC102184710	XM_005682296.3	1	10	0
LOC102176031	XM_005682333.3	1	18	0
LOC102176953	XM_005682337.3	1	14	0
ZNF34	XM_005688770.3	1	12	0
ZNF7	XM_005688773.3	1	15	0
ZNF181	XM_005692263.3	1	12	0
LOC102171183	XM_005692353.3	1	1	0
LOC102187255	XM_005692408.3	1	19	0
LOC102189514	XM_005692624.3	1	19	0
ZNF473	XM_005692734.3	1	20	0
ZNF432	XM_005692878.3	1	17	0
LOC102169898	XM_005692993.3	0	5	1
LOC106501731	XM_005693010.3	2	13	0
LOC102191731	XM_005693058.2	0	4	1
LOC102169215	XM_005693062.3	1	33	0
ZSCAN29	XM_005695293.3	0	6	1
LOC102177570	XM_005695603.3	1	32	1
ZFP57	XM_005696652.3	1	7	0
RBAK	XM_005697901.3	1	18	0
ZSCAN25	XM_005698089.3	1	7	1
LOC102169746	XM_005700553.2	2	9	0
ZSCAN23	XM_010801385.3	0	5	1
ZNF177	XM_010806715.2	1	11	0
ZNF554	XM_010807010.3	2	9	0
ZNF23	XM_010814706.3	1	17	0
ZNF567	XM_010814773.3	1	15	0
ZNF792	XM_010814848.3	1	10	0
ZNF235	XM_010815149.3	1	16	0
ZNF432	XM_010815311.3	1	17	0
LOC787554	XM_010815315.3	1	14	0
LOC101904435	XM_010815355.3	1	22	0
LOC787858	XM_010815363.3	1	14	0
LOC100336734	XM_010815369.3	1	14	0
LOC508131	XM_010815380.3	1	27	0
LOC618289	XM_010815412.3	1	24	0
LOC100336431	XM_010815433.3	2	4	0
LOC787287	XM_010815609.3	1	19	0
LOC528802	XM_010815628.3	1	12	0
LOC100138449	XM_010815648.3	1	9	0
ZNF446	XM_010815662.3	1	3	1
ZNF232	XM_010815976.3	0	6	1
ZNF286A	XM_010816055.2	1	10	0
ZSCAN2	XM_010816976.3	0	14	1
ZKSCAN7	XM_010817515.3	0	13	1
ZFP57	XM_010818393.3	1	7	0
ZNF174	XM_010819081.2	0	3	1
ZNF213	XM_010819240.2	1	6	1
LOC104970913	XM_010820461.3	1	10	0
ZNF81	XM_010821926.3	1	15	0
ZNF674	XM_010822051.3	1	11	0
LOC101118128	XM_012094903.4	1	34	0
ZNF132	XM_012094930.4	1	16	0
ZNF684	XM_012105711.4	1	8	0
LOC101120895	XM_012106207.3	1	13	0
LOC101122457	XM_012190252.4	1	34	0
ZNF568	XM_012190289.4	1	28	0
LOC101103915	XM_012190343.4	1	19	0
ZSCAN20	XM_013963014.2	0	10	1
LOC106501989	XM_013963033.2	1	2	0
ZNF333	XM_013965071.2	2	10	0
ZNF483	XM_013966218.2	1	13	1
ZNF285	XM_013971365.2	2	9	0
LOC102189237	XM_013971406.2	2	18	0
LOC102189789	XM_013971412.2	1	35	0
ZNF404	XM_013971416.2	1	15	0
LOC102174966	XM_013971566.2	1	18	0
ZNF613	XM_013971598.2	1	13	0
ZNF614	XM_013971602.2	2	12	0
LOC102189337	XM_013971622.2	2	11	0
LOC102174592	XM_013971712.2	1	13	0
LOC102179512	XM_013971714.2	2	12	0
LOC102175512	XM_013971721.2	1	9	0
LOC102175793	XM_013971727.2	1	10	0
LOC102182436	XM_013971736.2	1	26	0
LOC102181424	XM_013971746.2	1	17	0
MZF1	XM_013971753.2	0	13	1
LOC102178686	XM_013974610.2	1	4	1
ZNF205	XM_013974711.2	1	8	0
LOC102182379	XM_013975577.2	1	19	0
ZNF41	XM_013976505.2	1	18	0
LOC102174824	XM_013976736.2	1	14	0
LOC102186683	XM_013977184.2	2	8	0
ZNF786	XM_015095127.3	1	13	0
ZNF354C	XM_015095482.3	1	11	0
LOC101109994	XM_015100679.3	1	15	0
ZNF584	XM_015100713.3	1	8	0
ZSCAN12	XM_015102545.3	0	13	1
ZSCAN31	XM_015102563.3	0	8	1
ZNF112	XM_015458206.2	1	19	0
ZNF285	XM_015458209.2	2	9	0
LOC506495	XM_015458304.2	1	14	0
LOC618456	XM_015458343.2	1	19	0
LOC790201	XM_015458457.2	0	5	1
LOC112441491	XM_015458463.2	2	12	0
LOC527186	XM_015458465.2	1	9	0
LOC540014	XM_015458468.2	1	11	0
LOC101910047	XM_015458473.2	1	14	0
ZNF197	XM_015459423.2	1	23	0
ZNF445	XM_015459453.2	1	15	1
ZSCAN16	XM_015459934.2	0	4	1
ZSCAN9	XM_015459942.2	0	5	1
ZNF397	XM_015460037.2	0	21	1
ZNF397	XM_015460038.2	0	21	1
ZKSCAN5	XM_015460456.2	1	13	1
LOC100851938	XM_015461807.2	1	14	0
ZNF496	XM_015472165.2	1	5	1
ZNF300	XM_015472325.2	1	13	0
ZNF2	XM_015473342.2	1	19	0
LOC101903326	XM_015474387.1	2	5	0
ZNF605	XM_015475439.2	1	17	0
ZNF10	XM_015475448.2	1	11	0
ZKSCAN4	XM_018038517.1	1	7	1
ZKSCAN8	XM_018038550.1	1	24	1
ZFP57	XM_018038816.1	1	7	0
LOC102175174	XM_018039389.1	0	28	1
ZNF597	XM_018039857.1	1	7	0
ZSCAN25	XM_018039884.1	1	7	1
ZSCAN21	XM_018039895.1	1	13	1
LOC102172404	XM_018039986.1	2	9	0
LOC102175920	XM_018040009.1	1	3	0
ZNF263	XM_018040115.1	0	9	1
LOC102178413	XM_018040116.1	2	5	1
LOC102178413	XM_018040117.1	1	5	1
ZNF500	XM_018040936.1	1	4	1
ZNF596	XM_018041814.1	1	6	0
LOC100861104	XM_018042068.1	1	7	0
LOC102171842	XM_018042162.1	1	8	0
ZNF157	XM_018043626.1	1	12	0
LOC108634301	XM_018043689.1	1	6	0
LOC102176221	XM_018043837.1	1	11	0
LOC108634556	XM_018044543.1	2	32	0
LOC102189943	XM_018044544.1	1	15	0
LOC108634671	XM_018044733.1	2	8	0
ZNF74	XM_018044864.1	1	11	0
LOC102188032	XM_018044930.1	2	22	0
LOC108635041	XM_018045345.1	2	18	0
ZNF212	XM_018046813.1	1	3	0
ZNF554	XM_018050785.1	2	9	0
LOC102185172	XM_018051002.1	1	18	0
LOC102186291	XM_018051513.1	1	13	0
ZNF879	XM_018051576.1	1	13	0
LOC102184668	XM_018053251.1	1	18	0
ZNF79	XM_018055808.1	1	11	0
ZNF84	XM_018061461.1	1	19	0
ZNF235	XM_018062543.1	1	16	0
LOC102169896	XM_018062855.1	2	23	0
LOC108638009	XM_018062863.1	1	15	0
ZNF613	XM_018062925.1	1	12	0
LOC108638013	XM_018062949.1	2	26	0
LOC102191785	XM_018062972.1	1	31	0
LOC102170775	XM_018062978.1	1	36	0
LOC108633323	XM_018062982.1	1	25	0
LOC102188030	XM_018062983.1	1	24	0
LOC102189578	XM_018062988.1	1	23	0
LOC102173183	XM_018062994.1	1	19	0
LOC102172054	XM_018062995.1	1	20	0
LOC102175116	XM_018062996.1	1	17	0
LOC102191318	XM_018062998.1	1	16	0
LOC108638027	XM_018062999.1	2	17	0
LOC102168439	XM_018063000.1	1	15	0
LOC102175383	XM_018063004.1	1	14	0
LOC102188624	XM_018063009.1	1	9	0
LOC102175108	XM_018063014.1	1	12	0
ZNF233	XM_018063187.1	1	10	0
LOC102175434	XM_018063203.1	2	17	0
LOC108638080	XM_018063205.1	1	13	0
LOC108638082	XM_018063206.1	2	9	0
LOC108638084	XM_018063209.1	1	26	0
LOC108638086	XM_018063210.1	1	15	0
LOC102191604	XM_018063211.1	1	23	0
LOC102187258	XM_018063215.1	1	23	0
LOC102188077	XM_018063216.1	2	11	0
ZNF845	XM_018063217.1	2	15	0
ZIM2	XM_018063252.1	1	5	1
LOC108638102	XM_018063256.1	1	8	0
LOC102179040	XM_018063257.1	1	14	0
LOC102180074	XM_018063258.1	0	4	1
LOC108638103	XM_018063259.1	1	12	0
ZNF671	XM_018063260.1	2	6	0
ZNF584	XM_018063262.1	1	8	0
LOC102191363	XM_018063342.1	1	14	0
LOC102191363	XM_018063346.1	1	5	0
PEG3	XM_018063405.1	0	13	1
PEG3	XM_018063406.1	0	13	1
LOC102169045	XM_018063422.1	1	14	0
ZNF667	XM_018063430.1	1	16	0
ZNF470	XM_018063444.1	1	10	0
LOC102174870	XM_018063456.1	2	10	0
LOC108638123	XM_018063459.1	0	5	1
ZNF550	XM_018063467.1	1	8	0
ZNF444	XM_018063469.1	0	4	1
LOC102172654	XM_018063504.1	1	22	0
LOC102187621	XM_018063508.1	1	12	0
LOC102181985	XM_018063525.1	1	15	0
ZNF274	XM_018063530.1	2	5	1
LOC102172294	XM_018063540.1	1	9	0
ZNF8	XM_018063543.1	1	7	0
ZSCAN22	XM_018063556.1	0	4	1
LOC102186431	XM_018064686.1	1	21	0
LOC102185508	XM_018065917.1	1	9	0
ZNF662	XM_018066908.1	1	6	0
LOC102190827	XM_018067107.1	1	7	0
ZNF891	XM_024976958.1	1	10	0
LOC784914	XM_024977629.1	1	14	0
LOC784914	XM_024977631.1	1	28	0
ZIM2	XM_024977978.1	1	5	1
ZNF599	XM_024978188.1	1	14	0
ZNF180	XM_024978190.1	1	12	0
ZNF19	XM_024978344.1	1	10	0
ZNF274	XM_024978376.1	2	5	1
ZNF383	XM_024978454.1	1	9	0
LOC768229	XM_024978617.1	0	5	1
ZNF585A	XM_024978683.1	1	23	0
LOC615112	XM_024978708.1	1	13	0
LOC615112	XM_024978710.1	1	13	0
ZNF529	XM_024978712.1	1	11	0
ZNF529	XM_024978716.1	1	9	0
ZNF793	XM_024978727.1	1	8	0
ZNF473	XM_024978745.1	1	9	0
LOC787057	XM_024978759.1	1	10	0
LOC112442214	XM_024978766.1	1	14	0
LOC100848895	XM_024978770.1	1	14	0
LOC100140412	XM_024978866.1	0	5	1
ZSCAN5B	XM_024978867.1	0	5	1
LOC790324	XM_024978868.1	0	5	1
ZFP1	XM_024978880.1	1	9	0
ZNF114	XM_024979224.1	1	5	0
LOC785630	XM_024979278.1	2	7	0
LOC515089	XM_024979281.1	1	29	0
LOC787812	XM_024979283.1	1	23	0
LOC101902926	XM_024979290.1	2	6	0
LOC100848077	XM_024979300.1	1	30	0
LOC100300095	XM_024979304.1	1	24	0
LOC100299712	XM_024979309.1	1	22	0
LOC101907570	XM_024979314.1	1	5	0
LOC112442366	XM_024979315.1	2	9	0
LOC112441500	XM_024979324.1	1	12	0
LOC618456	XM_024979328.1	1	17	0
ZNF845	XM_024979331.1	1	22	0
ZFP28	XM_024979407.1	1	14	0
ZFP28	XM_024979413.1	1	14	0
ZFP28	XM_024979414.1	1	14	0
LOC523461	XM_024979416.1	1	13	0
LOC523461	XM_024979418.1	1	26	0
LOC100296121	XM_024979427.1	1	9	0
LOC528802	XM_024979435.1	1	11	0
ZNF550	XM_024979438.1	1	8	0
LOC789996	XM_024979443.1	1	11	0
ZNF233	XM_024979461.1	1	7	0
LOC100140550	XM_024979464.1	3	10	0
LOC112442406	XM_024979465.1	1	10	0
LOC100140695	XM_024979472.1	1	25	0
LOC100139360	XM_024979476.1	3	23	0
LOC104974936	XM_024979477.1	1	6	0
LOC101905616	XM_024979478.1	2	28	0
LOC112442416	XM_024979488.1	0	4	1
LOC104968500	XM_024979489.1	0	5	1
ZIM3	XM_024979491.1	1	9	0
ZSCAN4	XM_024979495.1	0	4	1
ZNF287	XM_024980044.1	1	14	1
ZNF596	XM_024981364.1	1	11	0
ZNF436	XM_024982705.1	1	12	0
LOC786139	XM_024983351.1	1	10	0
ZNF397	XM_024984197.1	0	10	1
ZNF655	XM_024984715.1	1	8	0
ZNF205	XM_024984830.1	1	8	0
ZKSCAN5	XM_024984856.1	1	12	1
ZNF789	XM_024985079.1	2	9	0
ZNF789	XM_024985080.1	2	9	0
LOC112444276	XM_024985094.1	1	11	0
ZNF316	XM_024985143.1	1	15	0
LOC101906717	XM_024985267.1	1	5	0
ZNF597	XM_024985297.1	1	4	0
LOC100140788	XM_024986335.1	1	10	0
ZNF75D	XM_024987708.1	1	5	1
ZNF182	XM_024988081.1	1	15	0
ZNF182	XM_024988082.1	1	15	0
ZNF182	XM_024988086.1	1	15	0
ZNF157	XM_024988533.1	1	11	0
ZFP69	XM_024989155.1	2	10	1
ZFP69B	XM_024989860.1	1	9	1
ZNF777	XM_024990667.1	1	9	0
ZNF746	XM_024990700.1	1	4	0
ZNF746	XM_024990704.1	1	4	0
ZNF282	XM_024991216.1	1	5	0
ZNF783	XM_024991217.1	1	4	0
ZNF783	XM_024991218.1	1	4	0
ZNF783	XM_024991219.1	1	4	0
ZNF879	XM_024993813.1	1	13	0
ZNF557	XM_024994261.1	1	9	0
ZNF496	XM_024994295.1	1	5	1
ZNF555	XM_024994459.1	1	15	0
ZFP2	XM_024994669.1	1	12	0
ZNF93	XM_024994731.1	1	14	0
LOC100139345	XM_024994884.1	1	19	0
ZNF699	XM_024994888.1	1	17	0
LOC789258	XM_024995035.1	1	10	0
LOC506181	XM_024995037.1	1	11	0
LOC539166	XM_025001032.1	1	15	0
ZNF74	XM_027956909.2	1	12	0
ZNF852	XM_027958077.2	1	13	0
ZSCAN9	XM_027959056.2	0	5	1
ZNF500	XM_027961428.2	1	5	1
ZNF500	XM_027961429.2	1	5	1
LOC101104632	XM_027962506.2	2	5	0
ZNF630	XM_027963430.2	1	10	0
ZNF782	XM_027964213.2	1	14	0
ZNF514	XM_027967111.2	2	7	0
ZNF514	XM_027967112.2	2	7	0
ZFP69B	XM_027968344.2	1	9	0
LOC105615213	XM_027969587.2	1	18	0
ZNF250	XM_027972808.2	1	13	0
ZNF585B	XM_027977387.2	1	23	0
LOC101102169	XM_027977414.2	1	28	0
ZNF565	XM_027977420.2	1	12	0
LOC106991537	XM_027977450.2	1	12	0
LOC114108745	XM_027977486.2	1	14	0
LOC114117769	XM_027977494.1	2	29	0
LOC101104336	XM_027977959.2	2	17	0
LOC101112959	XM_027978023.2	1	16	0
LOC105605940	XM_027978025.2	1	22	0
LOC114118018	XM_027978657.2	1	24	0
LOC105605893	XM_027978688.2	1	21	0
LOC105605777	XM_027978694.2	1	19	0
ZNF331	XM_027978733.2	1	12	0
LOC101105018	XM_027978865.2	1	13	0
LOC105602040	XM_027978926.2	1	23	0
ZNF274	XM_027978930.2	2	5	1
ZNF446	XM_027978942.2	1	3	1
LOC121816281	XM_042230382.1	1	12	0
ZNF382	XM_042230874.1	1	10	0
LOC101109901	XM_042230906.1	1	15	0
LOC101103089	XM_042231023.1	1	14	0
LOC101103089	XM_042231027.1	1	14	0
LOC114108745	XM_042231033.1	1	15	0
LOC114118029	XM_042231077.1	2	8	0
LOC114117957	XM_042231105.1	1	33	0
LOC114118024	XM_042231107.1	1	28	0
LOC105605886	XM_042231108.1	2	35	0
LOC105601990	XM_042231124.1	1	20	0
LOC114112673	XM_042231126.1	1	16	0
LOC105605808	XM_042231136.1	1	26	0
LOC121816008	XM_042231149.1	1	25	0
LOC101110828	XM_042231155.1	1	15	0
LOC114117925	XM_042231185.1	1	9	0
LOC114118046	XM_042231202.1	2	22	0
LOC114118046	XM_042231205.1	2	25	0
LOC105613406	XM_042231209.1	2	16	0
LOC105601991	XM_042231231.1	1	8	0
PEG3	XM_042231236.1	0	13	1
ZNF471	XM_042231238.1	1	19	0
ZNF582	XM_042231247.1	1	10	0
LOC121816000	XM_042231253.1	1	13	0
ZFP28	XM_042231296.1	1	23	0
LOC101111220	XM_042231307.1	1	21	0
ZNF8	XM_042231332.1	1	7	0
ZNF446	XM_042231337.1	1	3	1
LOC101122210	XM_042231383.1	2	21	0
LOC121816438	XM_042231402.1	1	5	0
LOC101110131	XM_042231406.1	1	43	0
LOC121816441	XM_042231408.1	2	20	0
LOC101109476	XM_042231413.1	2	26	0
LOC114117799	XM_042231417.1	1	15	0
ZIM3	XM_042231430.1	1	9	0
LOC105602107	XM_042231431.1	1	8	0
LOC121816451	XM_042231432.1	1	12	0
ZNF181	XM_042231966.1	1	12	0
LOC101109384	XM_042232116.1	2	18	0
ZNF283	XM_042232145.1	1	10	0
LOC101110170	XM_042232147.1	1	12	0
ZSCAN29	XM_042235347.1	0	6	1
LOC101122932	XM_042236535.1	1	6	0
ZKSCAN4	XM_042237156.1	1	7	1
LOC105603932	XM_042237159.1	0	13	2
LOC105603932	XM_042237162.1	0	13	2
ZFP57	XM_042237327.1	1	7	0
ZSCAN10	XM_042239733.1	0	14	1
ZNF689	XM_042239761.1	1	12	0
ZKSCAN2	XM_042239974.1	1	6	1
ZNF263	XM_042240143.1	1	9	1
ZKSCAN1	XM_042240246.1	0	6	1
ZNF3	XM_042240254.1	1	9	0
ZNF597	XM_042240667.1	1	4	0
LOC101122752	XM_042240684.1	2	9	0
LOC101107495	XM_042240712.1	1	7	0
LOC101107495	XM_042240714.1	1	7	0
ZNF596	XM_042241470.1	1	8	0
ZNF75D	XM_042242125.1	1	5	1
ZNF75D	XM_042242126.1	1	5	0
ZFP92	XM_042242336.1	2	9	0
ZNF484	XM_042243019.1	1	19	0
ZNF782	XM_042243025.1	1	14	0
LOC101101875	XM_042244108.1	1	9	0
ZNF2	XM_042246507.1	1	9	0
ZNF212	XM_042248982.1	1	3	0
ZNF746	XM_042248985.1	1	4	0
ZNF746	XM_042248987.1	1	4	0
LOC105609426	XM_042249901.1	2	2	0
ZNF454	XM_042250898.1	1	12	0
