# Supplementary material
Source: HighWire-hosted journal article supplement (doi:10.1101/gr.281289.125)
Supplement: Supplemental_Table_S4.xlsx [file Supplemental_Table_S4.xlsx]

## Sheet: Table S4
Table S4: Reference library of TE k-mers across 14 TE families in ruminant genomes.
TE families	TE subfamilies	K-mer sequences
LTR/ERV1	ALTR2B1_BT	GGAATGATTTCAGTGAGCCCAGACTCTTGCATCTTCCCATAC
LTR/ERV1	ALTR2B1_BT	AGGAATGATTTCAGTGAGCCCAGACTCTTGCATCTTCCCATA
LTR/ERV1	ALTR2B1_BT	GAATGATTTCAGTGAGCCCAGACTCTTGCATCTTCCCATACA
LTR/ERV1	ALTR2B1_BT	AAGGAATGATTTCAGTGAGCCCAGACTCTTGCATCTTCCCAT
LTR/ERV1	ALTR2B1_BT	AAAGGAATGATTTCAGTGAGCCCAGACTCTTGCATCTTCCCA
LTR/ERV1	ALTR2B1_BT	GGAAGATGCAAGAGTCTGGGCTCACTGAAATCATTCCTTTGA
LTR/ERV1	ALTR2B1_BT	ATTTCAGTGAGCCCAGACTCTTGCATCTTCCCATACATAGAA
LTR/ERV1	ALTR2B1_BT	TTTCAGTGAGCCCAGACTCTTGCATCTTCCCATACATAGAAA
LTR/ERV1	ALTR2B1_BT	GATTTCAGTGAGCCCAGACTCTTGCATCTTCCCATACATAGA
LTR/ERV1	ALTR2B1_BT	CTATGTATGGGAAGATGCAAGAGTCTGGGCTCACTGAAATCA
LTR/ERV1	ALTR2B1_BT	ATGATTTCAGTGAGCCCAGACTCTTGCATCTTCCCATACATA
LTR/ERV1	ALTR2B1_BT	ATCAAAGGAATGATTTCAGTGAGCCCAGACTCTTGCATCTTC
LTR/ERV1	ALTR2B1_BT	AATGATTTCAGTGAGCCCAGACTCTTGCATCTTCCCATACAT
LTR/ERV1	ALTR2B1_BT	TTCAGTGAGCCCAGACTCTTGCATCTTCCCATACATAGAAAA
LTR/ERV1	ALTR2B1_BT	TGCAAGCCTCTGGGCTCACTGAATTCATTCCTTTCATATGCA
LTR/ERV1	ALTR2B1_BT	CTTTTCTATGTATGGGAAGATGCAAGAGTCTGGGCTCACTGA
LTR/ERV1	ALTR2B1_BT	CATATGAAAGGAATGAATTCAGTGAGCCCAGAGGCTTGCATC
LTR/ERV1	ALTR2B1_BT	ATGCAAGCCTCTGGGCTCACTGAATTCATTCCTTTCATATGC
LTR/ERV1	ALTR2B1_BT	TGCAAGAGTCTGGGCTCACTGAAATCATTCCTTTGATATGCA
LTR/ERV1	ALTR2B1_BT	TAAACAAGAAATGTCACAGCCATCAGCGATTTCTGGCCTCCA
LTR/ERV1	ALTR2B1_BT	CAAAGGAATGATTTCAGTGAGCCCAGACTCTTGCATCTTCCC
LTR/ERV1	ALTR2B1_BT	AGATGCAAGCCTCTGGGCTCACTGAATTCATTCCTTTCATAT
LTR/ERV1	ALTR2B1_BT	AAGATGCAAGCCTCTGGGCTCACTGAATTCATTCCTTTCATA
LTR/ERV1	ALTR2B1_BT	TTATTGTTAATTAAAGAAAACCAGATATCTCAAGTTAAGGAA
LTR/ERV1	ALTR2B1_BT	TCTTGCATCTTCCCATACATAGAAAAGTGCTAAATTCCTTAA
LTR/ERV1	ALTR2B1_BT	TACAAGTTTGCAACAAAGGGAGCAGGCAGTCTGAACATCAAA
LTR/ERV1	ALTR2B1_BT	TAAATTCCTTAACTTGAGATATCTGGTTTTCTTTAATTAACA
LTR/ERV1	ALTR2B1_BT	GGCCAGAAATCGCTGATGGCTGTGACATTTCTTGTTTATTGA
LTR/ERV1	ALTR2B1_BT	GGAAGATGCAAGCCTCTGGGCTCACTGAATTCATTCCTTTCA
LTR/ERV1	ALTR2B1_BT	GCAAGCCTCTGGGCTCACTGAATTCATTCCTTTCATATGCAC
LTR/ERV1	ALTR2B1_BT	GCAAGAGTCTGGGCTCACTGAAATCATTCCTTTGATATGCAC
LTR/ERV1	ALTR2B1_BT	CTTGCATCTTCCCATACATAGAAAAGTGCTAAATTCCTTAAC
LTR/ERV1	ALTR2B1_BT	CTAAATTCCTTAACTTGAGATATCTGGTTTTCTTTAATTAAC
LTR/ERV1	ALTR2B1_BT	CATATCAAAGGAATGATTTCAGTGAGCCCAGACTCTTGCATC
LTR/ERV1	ALTR2B1_BT	ATTCCTTAACTTGAGATATCTGGTTTTCTTTAATTAACAATA
LTR/ERV1	ALTR2B1_BT	ATTATTGTTAATTAAAGAAAACCAGATATCTCAAGTTAAGGA
LTR/ERV1	ALTR2B1_BT	ATGCAAGAGTCTGGGCTCACTGAAATCATTCCTTTGATATGC
LTR/ERV1	ALTR2B1_BT	ATAAACAAGAAATGTCACAGCCATCAGCGATTTCTGGCCTCC
LTR/ERV1	ALTR2B1_BT	AGGCCAGAAATCGCTGATGGCTGTGACATTTCTTGTTTATTG
LTR/ERV1	ALTR2B1_BT	AGATGCAAGAGTCTGGGCTCACTGAAATCATTCCTTTGATAT
LTR/ERV1	ALTR2B1_BT	ACATCAAAAGTATTTTTGTGAATTAAAGAAAACCAGATATCT
LTR/ERV1	ALTR2B1_BT	AATTCCTTAACTTGAGATATCTGGTTTTCTTTAATTAACAAT
LTR/ERV1	ALTR2B1_BT	AATAAACAAGAAATGTCACAGCCATCAGCGATTTCTGGCCTC
LTR/ERV1	ALTR2B1_BT	AAGATGCAAGAGTCTGGGCTCACTGAAATCATTCCTTTGATA
LTR/ERV1	ALTR2B1_BT	AAGAGTCTGGGCTCACTGAAATCATTCCTTTGATATGCACCT
LTR/ERV1	ALTR2B1_BT	AACAAGAAATGTCACAGCCATCAGCGATTTCTGGCCTCCAAA
LTR/ERV1	ALTR2B1_BT	AAATTCCTTAACTTGAGATATCTGGTTTTCTTTAATTAACAA
LTR/ERV1	ALTR2B1_BT	AAACAAGAAATGTCACAGCCATCAGCGATTTCTGGCCTCCAA
LTR/ERV1	ALTR2B1_BT	TGAGGAGCTGGGGGAATGCAAGAAGCAAGGTGAACAAGGAAA
LTR/ERV1	ALTR2B1_BT	TCAGAGCTACTGAGATGCTGTCTCCTGGGCTTGGAGTCCTAA
LTR/ERV1	ALTR2B1_BT	TATACAAGTTTGCAACAAAGGGAGCAGGCAGTCTGAACATCA
LTR/ERV1	ALTR2B1_BT	TAGTCTGAACATCAAAAGATTATTGTTAATTAAAGAAAACCA
LTR/ERV1	ALTR2B1_BT	GTTTTGCAACAAAGGGCAGGTAGTCTGAATATCAAAAGATTA
LTR/ERV1	ALTR2B1_BT	GGTTTTCTTTAATTAACAATAATCTTTTGATGTTCAGACTAC
LTR/ERV1	ALTR2B1_BT	GGTAGTCTGAACATCAAAAGATTATTGTTAATTAAAGAAAAC
LTR/ERV1	ALTR2B1_BT	GGAGACAGCATCTCAGTAGCTCTGAGAAAACTGCTCCAAGGA
LTR/ERV1	ALTR2B1_BT	GATGGCTGTGACATTTCTTGTTTATTGATATGGCAGGAGATA
LTR/ERV1	ALTR2B1_BT	GAGTCTGGGCTCACTGAAATCATTCCTTTGATATGCACCTCA
LTR/ERV1	ALTR2B1_BT	GAAGTTTTGCAACAAAGGGCAGGTAGTCTGAATATCAAAAGA
LTR/ERV1	ALTR2B1_BT	GAACATCAAAAGATTATTGTTAATTAAAGAAAACCAGATATC
LTR/ERV1	ALTR2B1_BT	GAAAGGAATGAATTCAGTGAGCCCAGAGGCTTGCATCTTCCC
LTR/ERV1	ALTR2B1_BT	CTGAACATCAAAAGATTATTGTTAATTAAAGAAAACCAGATA
LTR/ERV1	ALTR2B1_BT	CTCAGAGCTACTGAGATGCTGTCTCCTGGGCTTGGAGTCCTA
LTR/ERV1	ALTR2B1_BT	CCTTAACTTGAGATATCTGGTTTTCTTTAATTAACAATAATC
LTR/ERV1	ALTR2B1_BT	CCATACAAAGGAAAAGTGCTAAATTCCTTAACTTGAGATAGC
LTR/ERV1	ALTR2B1_BT	CATCAAAAGTATTTTTGTGAATTAAAGAAAACCAGATATCTC
LTR/ERV1	ALTR2B1_BT	CAGAGCTACTGAGATGCTGTCTCCTGGGCTTGGAGTCCTAAA
LTR/ERV1	ALTR2B1_BT	CAAGTTTGCAACAAAGGGAGCAGGCAGTCTGAACATCAAAGA
LTR/ERV1	ALTR2B1_BT	CAAGAGTCTGGGCTCACTGAAATCATTCCTTTGATATGCACC
LTR/ERV1	ALTR2B1_BT	ATTTCTTGTTTATTGATATGGCAGGAGATATTTTCATTTCAC
LTR/ERV1	ALTR2B1_BT	ATCTGGTTTTCTTTAATTAACAATAATCTTTTGATGTTCAGA
LTR/ERV1	ALTR2B1_BT	ATCTCCTGCCATATCAATAAACAAGAAATGTCACAGCCATCA
LTR/ERV1	ALTR2B1_BT	ATCAATAAACAAGAAATGTCACAGCCATCAGCGATTTCTGGC
LTR/ERV1	ALTR2B1_BT	ATATCTGGTTTTCTTTAATTAACAATAATCTTTTGATGTTCA
LTR/ERV1	ALTR2B1_BT	ATATCTCCTGCCATATCAATAAACAAGAAATGTCACAGCCAT
LTR/ERV1	ALTR2B1_BT	ATACAAGTTTGCAACAAAGGGAGCAGGCAGTCTGAACATCAA
LTR/ERV1	ALTR2B1_BT	AGTTAAGGAATTTAGCACTTTTCTATGTATGGGAAGATGCAA
LTR/ERV1	ALTR2B1_BT	AGTCTGGGCTCACTGAAATCATTCCTTTGATATGCACCTCAG
LTR/ERV1	ALTR2B1_BT	AGTCTGAACATCAAAAGATTATTGTTAATTAAAGAAAACCAG
LTR/ERV1	ALTR2B1_BT	AGGTAGTCTGAACATCAAAAGATTATTGTTAATTAAAGAAAA
LTR/ERV1	ALTR2B1_BT	AGGAATGAATTCAGTGAGCCCAGAGGCTTGCATCTTCCCATA
LTR/ERV1	ALTR2B1_BT	AGATTATTGTTAATTAAAGAAAACCAGATATCTCAAGTTAAG
LTR/ERV1	ALTR2B1_BT	AGAGCTACTGAGATGCTGTCTCCTGGGCTTGGAGTCCTAAAC
LTR/ERV1	ALTR2B1_BT	AGAAGTTTTGCAACAAAGGGCAGGTAGTCTGAATATCAAAAG
LTR/ERV1	ALTR2B1_BT	ACAAGTTTGCAACAAAGGGAGCAGGCAGTCTGAACATCAAAG
LTR/ERV1	ALTR2B1_BT	AATCTTTTGATATTCAGACTACCTGCCCTTTGTTGCAAAACT
LTR/ERV1	ALTR2B1_BT	AAGTTTTGCAACAAAGGGCAGGTAGTCTGAATATCAAAAGAT
LTR/ERV1	ALTR2B1_BT	AAGTTTGCAACAAAGGGAGCAGGCAGTCTGAACATCAAAGAT
LTR/ERV1	ALTR2B1_BT	AAGGAATGAATTCAGTGAGCCCAGAGGCTTGCATCTTCCCAT
LTR/ERV1	ALTR2B1_BT	AAGATTATTGTTAATTAAAGAAAACCAGATATCTCAAGTTAA
LTR/ERV1	ALTR2B1_BT	AAAGGAATGAATTCAGTGAGCCCAGAGGCTTGCATCTTCCCA
LTR/ERV1	ALTR2B1_BT	AAAGATTATTGTTAATTAAAGAAAACCAGATATCTCAAGTTA
LTR/ERV1	ALTR2B1_BT	TGAAAATATCTCCTGCCATATCAATAAACAAGAAATGTCACA
LTR/ERV1	ALTR2B1_BT	TCAAAAGTATTTTTGTGAATTAAAGAAAACCAGATATCTCAA
LTR/ERV1	ALTR2B1_BT	TATCTGGTTTTCTTTAATTCACAAAAATACTTTTGATGTTCA
LTR/ERV1	ALTR2B1_BT	TATCTCAAGTTAAGGAATTTAGCACTTTTCCTTTGTATGGGA
LTR/ERV1	ALTR2B1_BT	TAGAAGTTTTGCAACAAAGGGCAGGTAGTCTGAATATCAAAA
LTR/ERV1	ALTR2B1_BT	GTCTGAACATCAAAAGATTATTGTTAATTAAAGAAAACCAGA
LTR/ERV1	ALTR2B1_BT	GGAATGAATTCAGTGAGCCCAGAGGCTTGCATCTTCCCATAC
LTR/ERV1	ALTR2B1_BT	GCTGAGGTGCATATCAAAGGAATGATTTCAGTGAGCCCAGAC
LTR/ERV1	ALTR2B1_BT	GCTGAGGAGCTGGGGGAATGCAAGAAGCAAGGTGAACAAGGA
LTR/ERV1	ALTR2B1_BT	GCAACAAAGGGAGCAGGCAGTCTGAACATCAAAGATCAGGTA
LTR/ERV1	ALTR2B1_BT	GAGGAGCTGGGGGAATGCAAGAAGCAAGGTGAACAAGGAAAC
LTR/ERV1	ALTR2B1_BT	GAGCCCAGACTCTTGCATCTTCCCATACATAGAAAAGCACTA
LTR/ERV1	ALTR2B1_BT	GAATGAATTCAGTGAGCCCAGAGGCTTGCATCTTCCCATACA
LTR/ERV1	ALTR2B1_BT	CTTGTTCACCTTGCTTCTTGCATTCCCCCAGCTCCTCAGCAA
LTR/ERV1	ALTR2B1_BT	CTTGAGATATCTGGTTTTCTTTAATTAACAATAATCTTTTGA
LTR/ERV1	ALTR2B1_BT	CTGTTTCCTTGTTCACCTTGCTTCTTGCATTCCCCCAGCTCC
LTR/ERV1	ALTR2B1_BT	CTGTGACATTTCTTGTTTATTGATATGGCAGGAGATATTTTC
LTR/ERV1	ALTR2B1_BT	CTGAGGAGCTGGGGGAATGCAAGAAGCAAGGTGAACAAGGAA
LTR/ERV1	ALTR2B1_BT	CTCTTGCATCTTCCCATACATAGAAAAGTGCTAAATTCCTTA
LTR/ERV1	ALTR2B1_BT	CTCTGGGCTCACTGAATTCATTCCTTTCATATGCACCTCAGC
LTR/ERV1	ALTR2B1_BT	CTCCTTGGAGCAGTTTTCTCAGAGCTACTGAGATGCTGTCTC
LTR/ERV1	ALTR2B1_BT	CCTTGTTCACCTTGCTTCTTGCATTCCCCCAGCTCCTCAGCA
LTR/ERV1	ALTR2B1_BT	CCCATACAAAGGAAAAGTGCTAAATTCCTTAACTTGAGATAG
LTR/ERV1	ALTR2B1_BT	CATTTCTTGTTTATTGATATGGCAGGAGATATTTTCATTTCA
LTR/ERV1	ALTR2B1_BT	CATCAAAAGATTATTGTTAATTAAAGAAAACCAGATATCTCA
LTR/ERV1	ALTR2B1_BT	CAGTGAGCCCAGACTCTTGCATCTTCCCATACATAGAAAAGC
LTR/ERV1	ALTR2B1_BT	CAGGTAGTCTGAACATCAAAAGATTATTGTTAATTAAAGAAA
LTR/ERV1	ALTR2B1_BT	CAAGTTAAGGAATTTAGCACTTTTCTATGTATGGGAAGATGC
LTR/ERV1	ALTR2B1_BT	CAAGCCTCTGGGCTCACTGAATTCATTCCTTTCATATGCACC
LTR/ERV1	ALTR2B1_BT	CAAGAAATGTCACAGCCATCAGCGATTTCTGGCCTCCAAATG
LTR/ERV1	ALTR2B1_BT	ATGAAAGGAATGAATTCAGTGAGCCCAGAGGCTTGCATCTTC
LTR/ERV1	ALTR2B1_BT	ATGAAAATATCTCCTGCCATATCAATAAACAAGAAATGTCAC
LTR/ERV1	ALTR2B1_BT	ATCTGGTTTTCTTTAATTCACAAAAATACTTTTGATGTTCAG
LTR/ERV1	ALTR2B1_BT	ATCCTGTTTCCTTGTTCACCTTGCTTCTTGCATTCCCCCAGC
LTR/ERV1	ALTR2B1_BT	ATCAAAAGTATTTTTGTGAATTAAAGAAAACCAGATATCTCA
LTR/ERV1	ALTR2B1_BT	ATCAAAAGATTATTGTTAATTAAAGAAAACCAGATATCTCAA
LTR/ERV1	ALTR2B1_BT	ATATCTGGTTTTCTTTAATTCACAAAAATACTTTTGATGTTC
LTR/ERV1	ALTR2B1_BT	ATATACAAGTTTGCAACAAAGGGAGCAGGCAGTCTGAACATC
LTR/ERV1	ALTR2B1_BT	ATAGAAGTTTTGCAACAAAGGGCAGGTAGTCTGAATATCAAA
LTR/ERV1	ALTR2B1_BT	ATACAAAGGAAAAGTGCTAAATTCCTTAACTTGAGATAGCTG
LTR/ERV1	ALTR2B1_BT	ATAATCTTTTGATATTCAGACTACCTGCCCTTTGTTGCAAAA
LTR/ERV1	ALTR2B1_BT	AGTGCTTTTCTATGTATGGGAAGATGCAAGAGTCTGGGCTCA
LTR/ERV1	ALTR2B1_BT	AGTCTGAACATCAAAGATCAGGTATCAAGTTAAGGAATTTAG
LTR/ERV1	ALTR2B1_BT	AGTCACAACCTGAAAGTAGAGAGTTATTTTATTTGGTGGGAA
LTR/ERV1	ALTR2B1_BT	AGGAGCTGGGGGAATGCAAGAAGCAAGGTGAACAAGGAAACA
LTR/ERV1	ALTR2B1_BT	AGCTGAGGTGCATATGAAAGGAATGAATTCAGTGAGCCCAGA
LTR/ERV1	ALTR2B1_BT	AGCTGAGGTGCATATCAAAGGAATGATTTCAGTGAGCCCAGA
LTR/ERV1	ALTR2B1_BT	AGCTATCTCAAGTTAAGGAATTTAGCACTTTTCCTTTGTATG
LTR/ERV1	ALTR2B1_BT	AGATGCAAGAGTCTGGGCTCACTGAAATCATTCCTTTCATAT
LTR/ERV1	ALTR2B1_BT	AGAGTCTGGGCTCACTGAAATCATTCCTTTGATATGCACCTC
LTR/ERV1	ALTR2B1_BT	ACTTGAGATATCTGGTTTTCTTTAATTAACAATAATCTTTTG
LTR/ERV1	ALTR2B1_BT	ACCTGATCTTTGATGTTCAGACTGCCTGCTCCCTTTGTTGCA
LTR/ERV1	ALTR2B1_BT	ACATTTCTTGTTTATTGATATGGCAGGAGATATTTTCATTTC
LTR/ERV1	ALTR2B1_BT	ACATCAAAAGATTATTGTTAATTAAAGAAAACCAGATATCTC
LTR/ERV1	ALTR2B1_BT	ACAAGAAATGTCACAGCCATCAGCGATTTCTGGCCTCCAAAT
LTR/ERV1	ALTR2B1_BT	AATGAAAATATCTCCTGCCATATCAATAAACAAGAAATGTCA
LTR/ERV1	ALTR2B1_BT	AATCCTGTTTCCTTGTTCACCTTGCTTCTTGCATTCCCCCAG
LTR/ERV1	ALTR2B1_BT	AAGTTAAGGAATTTAGCACTTTTCTATGTATGGGAAGATGCA
LTR/ERV1	ALTR2B1_BT	AAGGAATTTAGCACTTTTCTATGTATGGGAAGATGCAAGAGT
LTR/ERV1	ALTR2B1_BT	AAGATGCAAGAGTCTGGGCTCACTGAAATCATTCCTTTCATA
LTR/ERV1	ALTR2B1_BT	AAGAAATGTCACAGCCATCAGCGATTTCTGGCCTCCAAATGT
LTR/ERV1	ALTR2B1_BT	AACATCAAAAGTATTTTTGTGAATTAAAGAAAACCAGATATC
LTR/ERV1	ALTR2B1_BT	AACATCAAAAGATTATTGTTAATTAAAGAAAACCAGATATCT
LTR/ERV1	ALTR2B1_BT	AAATGAAAATATCTCCTGCCATATCAATAAACAAGAAATGTC
LTR/ERV1	ALTR2B1_BT	AAAAGATTATTGTTAATTAAAGAAAACCAGATATCTCAAGTT
LTR/ERV1	ALTR2B1_BT	TTTCAGTGAGCCCCGATTCTTGCATCTTTCCATATATGGAAA
LTR/ERV1	ALTR2B1_BT	TTCAGTGAGCCCCGATTCTTGCATCTTTCCATATATGGAAAA
LTR/ERV1	ALTR2B1_BT	TGTGAAATGAAAATATCTCCTGCCATATCAATAAACAAGAAA
LTR/ERV1	ALTR2B1_BT	TGCAAGAGTCTGGGCTCACTGAAATCATTCCTTTCATATGCA
LTR/ERV1	ALTR2B1_BT	TGCAAGAATCGGGGCTCACTGAAATCATTCCTTTGATATGAA
LTR/ERV1	ALTR2B1_BT	TGAAATCATTCCTTTGATATGCACCTCAGCTATCTGGGGCCA
LTR/ERV1	ALTR2B1_BT	TCTGAACATCAAAAGTATTTTTGTGAATTAAAGAAAACCAGA
LTR/ERV1	ALTR2B1_BT	TCATTCACATTTGGAGGCCAGAAATCACTGATGGCTGTGACA
LTR/ERV1	ALTR2B1_BT	TCATAATCTTTTGATATTCAGACTACCTGCCCTTTGTTGCAA
LTR/ERV1	ALTR2B1_BT	TACCCCTGGTCTGACAGCTATCAGATTGCAGCCACTCCCTAA
LTR/ERV1	ALTR2B1_BT	GTTTTGCAACAAAGGGCAGGTAGTCTGAACATCAAAAGATTA
LTR/ERV1	ALTR2B1_BT	GTTTGCAACAAAGGGAGCAGGCAGTCTGAACATCAAAGATCA
LTR/ERV1	ALTR2B1_BT	GTTCACCTTGCTTCTTGCATTCCCCCAGCTCCTCAGCAATCA
LTR/ERV1	ALTR2B1_BT	GTTACATAGAAGTTTTGCAACAAAGGGCAGGTAGTCTGAATA
LTR/ERV1	ALTR2B1_BT	GTGGGAATTTTTAGGACTTCAAGCCCAGGAGACAGCATCTCA
LTR/ERV1	ALTR2B1_BT	GTGATTGCTGAGGAGCTGGGGGAATGCAAGAAGCAAGGTGAA
LTR/ERV1	ALTR2B1_BT	GTGAGCCCAGACTCTTGCATCTTCCCATACATAGAAAAGCAC
LTR/ERV1	ALTR2B1_BT	GTCCTAAACATTCCCACCAAATAAAATAACTCTCTACTTTCA
LTR/ERV1	ALTR2B1_BT	GGTTTTCTTTAATTCACAAAAATACTTTTGATGTTCAGACTA
LTR/ERV1	ALTR2B1_BT	GGCTATATACAAGTTTGCAACAAAGGGAGCAGGCAGTCTGAA
LTR/ERV1	ALTR2B1_BT	GGAAGGATTGAATCCAGTGAGTCCAGAGGCTTGCATCTTCCC
LTR/ERV1	ALTR2B1_BT	GGAAGATGCAAGCCTCTGGACTCACTGGATTCAATCCTTCCA
LTR/ERV1	ALTR2B1_BT	GGAAATTCAGGAAAGAAAAGAATACCTGCTTTCCAGCAGCCA
LTR/ERV1	ALTR2B1_BT	GCTATATACAAGTTTGCAACAAAGGGAGCAGGCAGTCTGAAC
LTR/ERV1	ALTR2B1_BT	GCTAAATTCCTTAACTTGATACCTGATCTTTGATGTTCAGAC
LTR/ERV1	ALTR2B1_BT	GCCTCTGGGCTCACTGAATTCATTCCTTTCATATGCACCTCA
LTR/ERV1	ALTR2B1_BT	GCCCAGACTCTTGCATCTTCCCATACATAGAAAAGCACTAAA
LTR/ERV1	ALTR2B1_BT	GCATTCACATTTGGAGGCCAGAAATCGCTGATGGCTGTGACA
LTR/ERV1	ALTR2B1_BT	GCAAGAATCGGGGCTCACTGAAATCATTCCTTTGATATGAAC
LTR/ERV1	ALTR2B1_BT	GCAACAAAGGGCAGGTAGTCTGAATATCAAAAGATTATGATA
LTR/ERV1	ALTR2B1_BT	GATTTCAGTGAGCCCCGATTCTTGCATCTTTCCATATATGGA
LTR/ERV1	ALTR2B1_BT	GATTGCTGAGGAGCTGGGGGAATGCAAGAAGCAAGGTGAACA
LTR/ERV1	ALTR2B1_BT	GATGTCATATCTATCTGTGATTCTGGCCTTCCCAAATGTGAA
LTR/ERV1	ALTR2B1_BT	GATATTCAGACTACCTGCCCTTTGTTGCAAAACTTCTATGTA
LTR/ERV1	ALTR2B1_BT	GATATGTGAAGTTCATATCAAAGGAATGATTTCAGTGAGCCC
LTR/ERV1	ALTR2B1_BT	GATAGCTGAGGTGCATATCAAAGGAATGATTTCAGTGAGCCC
LTR/ERV1	ALTR2B1_BT	GAGGAATATACCCCTGGTCTGACAGCTATCAGATTGCAGCCA
LTR/ERV1	ALTR2B1_BT	GACTGTGACATCCTTGTTTACTGATATGGCAGGAAATACTCC
LTR/ERV1	ALTR2B1_BT	GAATGATTTCAGTGAGCCCCGATTCTTGCATCTTTCCATATA
LTR/ERV1	ALTR2B1_BT	GAATCGGGGCTCACTGAAATCATTCCTTTGATATGAACTTCA
LTR/ERV1	ALTR2B1_BT	GAATATACCCCTGGTCTGACAGCTATCAGATTGCAGCCACTC
LTR/ERV1	ALTR2B1_BT	GAAGGATTGAATCCAGTGAGTCCAGAGGCTTGCATCTTCCCA
LTR/ERV1	ALTR2B1_BT	GAAATGTCACAGCCATCAGCGATTTCTGGCCTCCAAATGTGA
LTR/ERV1	ALTR2B1_BT	GAAAGATGCAAGAATCGGGGCTCACTGAAATCATTCCTTTGA
LTR/ERV1	ALTR2B1_BT	CTGGTTTTCTTTAATTCACAAAAATACTTTTGATGTTCAGAC
LTR/ERV1	ALTR2B1_BT	CTGGGCTCACTGAAATCATTCCTTTGATATGCACCTCAGCTA
LTR/ERV1	ALTR2B1_BT	CTGGCCCCAGATAGCTGAGGTGCATATCAAAGGAATGATTTC
LTR/ERV1	ALTR2B1_BT	CTGATGGCTGTGACATTTCTTGTTTATTGATTTGGCAGTAGA
LTR/ERV1	ALTR2B1_BT	CTGATGGCTGTGACATTTCTTGTTTATTGATATGGCAGGAGA
LTR/ERV1	ALTR2B1_BT	CTGATCTTTGATGTTCAGACTGCCTGCTCCCTTTGTTGCAAA
LTR/ERV1	ALTR2B1_BT	CTGAAATCATTCCTTTGATATGCACCTCAGCTATCTGGGGCC
LTR/ERV1	ALTR2B1_BT	CTGAAATCATTCCTTTGATATGAACTTCACATATCTGGGGCC
LTR/ERV1	ALTR2B1_BT	CTGAAAGTAGAGAGTTATTTTATTTGGTGGGAATGTTTAGGA
LTR/ERV1	ALTR2B1_BT	CTCATTCACATTTGGAGGCCAGAAATCACTGATGGCTGTGAC
LTR/ERV1	ALTR2B1_BT	CTATATACAAGTTTGCAACAAAGGGAGCAGGCAGTCTGAACA
LTR/ERV1	ALTR2B1_BT	CTACTGCCAAATCAATAAACAAGAAATGTCACAGCCATCAGC
LTR/ERV1	ALTR2B1_BT	CTACCTGCCCTTTGTTGCAAAACTTCTATATAACCTGGCTCC
LTR/ERV1	ALTR2B1_BT	CGGGGCTCACTGAAATCATTCCTTTGATATGAACTTCACATA
LTR/ERV1	ALTR2B1_BT	CGCTGATGGCTGTGACATTTCTTGTTTATTGATTTGGCAGTA
LTR/ERV1	ALTR2B1_BT	CGCATTCACATTTGGAGGCCAGAAATCGCTGATGGCTGTGAC
LTR/ERV1	ALTR2B1_BT	CCTTCATTTATCATAATCTTTTGATATTCAGACTACCTGCCC
LTR/ERV1	ALTR2B1_BT	CCTGTTTCCTTGTTCACCTTGCTTCTTGCATTCCCCCAGCTC
LTR/ERV1	ALTR2B1_BT	CCTGATCTTTGATGTTCAGACTGCCTGCTCCCTTTGTTGCAA
LTR/ERV1	ALTR2B1_BT	CCTCTGGGCTCACTGAATTCATTCCTTTCATATGCACCTCAG
LTR/ERV1	ALTR2B1_BT	CCGCATTCACATTTGGAGGCCAGAAATCGCTGATGGCTGTGA
LTR/ERV1	ALTR2B1_BT	CCCCTGGTCTGACAGCTATCAGATTGCAGCCACTCCCTAAGG
LTR/ERV1	ALTR2B1_BT	CCCAGATATGTGAAGTTCATATCAAAGGAATGATTTCAGTGA
LTR/ERV1	ALTR2B1_BT	CCCAGATAGCTGAGGTGCATATGAAAGGAATGAATTCAGTGA
LTR/ERV1	ALTR2B1_BT	CCCAGATAGCTGAGGTGCATATCAAAGGAATGATTTCAGTGA
LTR/ERV1	ALTR2B1_BT	CCATCAGTGATTTCTGGCCTCCAAATGTGAATGAGGGCTCCC
LTR/ERV1	ALTR2B1_BT	CCATATATGGAAAGATGCAAGAATCGGGGCTCACTGAAATCA
LTR/ERV1	ALTR2B1_BT	CCAGATATGTGAAGTTCATATCAAAGGAATGATTTCAGTGAG
LTR/ERV1	ALTR2B1_BT	CCAGATAGCTGAGGTGCATATGAAAGGAATGAATTCAGTGAG
LTR/ERV1	ALTR2B1_BT	CCAGATAGCTGAGGTGCATATCAAAGGAATGATTTCAGTGAG
LTR/ERV1	ALTR2B1_BT	CCAAATCAATAAACAAGAAATGTCACAGCCATCAGCGATTTC
LTR/ERV1	ALTR2B1_BT	CATTCCCACCAAATAAAATAACTCTCTACTTTCAGGTTGTGA
LTR/ERV1	ALTR2B1_BT	CATATGAAAGGAATGATTTCAGTGAGCCCAGACTCTTGCATC
LTR/ERV1	ALTR2B1_BT	CATATCAAAGGAATGATTTCAGTGAGCCCCGATTCTTGCATC
LTR/ERV1	ALTR2B1_BT	CATAGAAGTTTTGCAACAAAGGGCAGGTAGTCTGAATATCAA
LTR/ERV1	ALTR2B1_BT	CATAATCTTTTGATATTCAGACTACCTGCCCTTTGTTGCAAA
LTR/ERV1	ALTR2B1_BT	CAGTCTGAACATCAAAGATCAGGTATCAAGTTAAGGAATTTA
LTR/ERV1	ALTR2B1_BT	CAGGTTACATAGAAGTTTTGCAACAAAGGGCAGGTAGTCTGA
LTR/ERV1	ALTR2B1_BT	CAGGCAGTCTGAACATCAAAGATCAGGTATCAAGTTAAGGAA
LTR/ERV1	ALTR2B1_BT	CAGATATGTGAAGTTCATATCAAAGGAATGATTTCAGTGAGC
LTR/ERV1	ALTR2B1_BT	CAGATAGCTGAGGTGCATATCAAAGGAATGATTTCAGTGAGC
LTR/ERV1	ALTR2B1_BT	CAGACTGCCTGCTCCCTTTGTTGCAAACTTGTATATAGCCTG
LTR/ERV1	ALTR2B1_BT	CAGACTCTTGCATCTTCCCATACATAGAAAAGTGCTAAATTC
LTR/ERV1	ALTR2B1_BT	CACTGAAATCATTCCTTTGATATGCACCTCAGCTATCTGGGG
LTR/ERV1	ALTR2B1_BT	CACTGAAATCATTCCTTTGATATGAACTTCACATATCTGGGG
LTR/ERV1	ALTR2B1_BT	CAATCCTGTTTCCTTGTTCACCTTGCTTCTTGCATTCCCCCA
LTR/ERV1	ALTR2B1_BT	CAACAAAGGGCAGGTAGTCTGAATATCAAAAGATTATGATAA
LTR/ERV1	ALTR2B1_BT	CAAAGGGCAGGTAGTCTGAATATCAAAAGATTATGATAAATG
LTR/ERV1	ALTR2B1_BT	CAAAGGAATGATTTCAGTGAGCCCCGATTCTTGCATCTTTCC
LTR/ERV1	ALTR2B1_BT	CAAAAGTATTTTTGTGAATTAAAGAAAACCAGATATCTCAAG
LTR/ERV1	ALTR2B1_BT	ATTTCAGTGAGCCCCGATTCTTGCATCTTTCCATATATGGAA
LTR/ERV1	ALTR2B1_BT	ATTTAGTGCTTTTCTATGTATGGGAAGATGCAAGAGTCTGGG
LTR/ERV1	ALTR2B1_BT	ATTGCTGAGGAGCTGGGGGAATGCAAGAAGCAAGGTGAACAA
LTR/ERV1	ALTR2B1_BT	ATTCCCACCAAATAAAATAACTCTCTACTTTCAGGTTGTGAC
LTR/ERV1	ALTR2B1_BT	ATTCAGGAAAGAAAAGAATACCTGCTTTCCAGCAGCCATCAG
LTR/ERV1	ALTR2B1_BT	ATTCAGACTACCTGCCCTTTGTTGCAAAACTTCTATGTAACC
LTR/ERV1	ALTR2B1_BT	ATGTTCAGACTGCCTGCTCCCTTTGTTGCAAACTTGTATATA
LTR/ERV1	ALTR2B1_BT	ATGTGAAGTTCATATCAAAGGAATGATTTCAGTGAGCCCCGA
LTR/ERV1	ALTR2B1_BT	ATGTCATATCTATCTGTGATTCTGGCCTTCCCAAATGTGAAT
LTR/ERV1	ALTR2B1_BT	ATGTCACAGCCATCAGTGATTTCTGGCCTCCAAATGTGAATG
LTR/ERV1	ALTR2B1_BT	ATGTCACAGCCATCAGCGATTTCTGGCCTCCAAATGTGAATG
LTR/ERV1	ALTR2B1_BT	ATGGCTGCTGGAAAGCAGGTATTCTTTTCTTTCCTGAATTTC
LTR/ERV1	ALTR2B1_BT	ATGGAGTATTTCCTGCCATATCAGTAAACAAGGATGTCACAG
LTR/ERV1	ALTR2B1_BT	ATGCAAGAGTCTGGGCTCACTGAAATCATTCCTTTCATATGC
LTR/ERV1	ALTR2B1_BT	ATGCAAGAATCGGGGCTCACTGAAATCATTCCTTTGATATGA
LTR/ERV1	ALTR2B1_BT	ATGATTTCAGTGAGCCCCGATTCTTGCATCTTTCCATATATG
LTR/ERV1	ALTR2B1_BT	ATGAAAGGAATGATTTCAGTGAGCCCAGACTCTTGCATCTTC
LTR/ERV1	ALTR2B1_BT	ATCGGGGCTCACTGAAATCATTCCTTTGATATGAACTTCACA
LTR/ERV1	ALTR2B1_BT	ATCGCTGATGGCTGTGACATTTCTTGTTTATTGATTTGGCAG
LTR/ERV1	ALTR2B1_BT	ATCATAATCTTTTGATATTCAGACTACCTGCCCTTTGTTGCA
LTR/ERV1	ALTR2B1_BT	ATATTCAGACTACCTGCCCTTTGTTGCAAAACTTCTATGTAA
LTR/ERV1	ALTR2B1_BT	ATATGTGAAGTTCATATCAAAGGAATGATTTCAGTGAGCCCC
LTR/ERV1	ALTR2B1_BT	ATATGGAAAGATGCAAGAATCGGGGCTCACTGAAATCATTCC
LTR/ERV1	ALTR2B1_BT	ATATACCCCTGGTCTGACAGCTATCAGATTGCAGCCACTCCC
LTR/ERV1	ALTR2B1_BT	ATAGCTGAGGTGCATATCAAAGGAATGATTTCAGTGAGCCCA
LTR/ERV1	ALTR2B1_BT	ATACCCCTGGTCTGACAGCTATCAGATTGCAGCCACTCCCTA
LTR/ERV1	ALTR2B1_BT	ATAATCTTTTGATGTTCAGACTACCTGCCCTTTGTTGCAAAA
LTR/ERV1	ALTR2B1_BT	AGTTCATATCAAAGGAATGATTTCAGTGAGCCCCGATTCTTG
LTR/ERV1	ALTR2B1_BT	AGTGGCTGCAATCTGATAGCTGTCAGACCAGGGGTATATTCC
LTR/ERV1	ALTR2B1_BT	AGTGAGCCCAGACTCTTGCATCTTCCCATACATAGAAAAGCA
LTR/ERV1	ALTR2B1_BT	AGTCTGAACATCAAAAGTATTTTTGTGAATTAAAGAAAACCA
LTR/ERV1	ALTR2B1_BT	AGGTTACATAGAAGTTTTGCAACAAAGGGCAGGTAGTCTGAA
LTR/ERV1	ALTR2B1_BT	AGGGCAGGTAGTCTGAATATCAAAAGATTATGATAAATGAAG
LTR/ERV1	ALTR2B1_BT	AGGGAGTGGCTGCAATCTGATAGCTGTCAGACCAGGGGTATA
LTR/ERV1	ALTR2B1_BT	AGGCTATATACAAGTTTGCAACAAAGGGAGCAGGCAGTCTGA
LTR/ERV1	ALTR2B1_BT	AGGCAGTCTGAACATCAAAGATCAGGTATCAAGTTAAGGAAT
LTR/ERV1	ALTR2B1_BT	AGGAGCCAGGTTATATAGAAGTTTTGCAACAAAGGGCAGGTA
LTR/ERV1	ALTR2B1_BT	AGGAATTTAGCACTTTTCTATGTATGGGAAGATGCAAGAGTC
LTR/ERV1	ALTR2B1_BT	AGGAATGATTTCAGTGAGCCCCGATTCTTGCATCTTTCCATA
LTR/ERV1	ALTR2B1_BT	AGGAATATACCCCTGGTCTGACAGCTATCAGATTGCAGCCAC
LTR/ERV1	ALTR2B1_BT	AGCTGGGGGAATGCAAGAAGCAAGGTGAACAAGGAAACAGGA
LTR/ERV1	ALTR2B1_BT	AGCCTCTGGGCTCACTGAATTCATTCCTTTCATATGCACCTC
LTR/ERV1	ALTR2B1_BT	AGCCCAGACTCTTGCATCTTCCCATACATAGAAAAGCACTAA
LTR/ERV1	ALTR2B1_BT	AGCCAGGTTATATAGAAGTTTTGCAACAAAGGGCAGGTAGTC
LTR/ERV1	ALTR2B1_BT	AGATGCAAGAATCGGGGCTCACTGAAATCATTCCTTTGATAT
LTR/ERV1	ALTR2B1_BT	AGATATGTGAAGTTCATATCAAAGGAATGATTTCAGTGAGCC
LTR/ERV1	ALTR2B1_BT	AGATAGCTGAGGTGCATATCAAAGGAATGATTTCAGTGAGCC
LTR/ERV1	ALTR2B1_BT	AGACTCTTGCATCTTCCCATACATAGAAAAGTGCTAAATTCC
LTR/ERV1	ALTR2B1_BT	AGACTACCTGCCCTTTGTTGCAAAACTTCTATATAACCTGGC
LTR/ERV1	ALTR2B1_BT	AGAATCGGGGCTCACTGAAATCATTCCTTTGATATGAACTTC
LTR/ERV1	ALTR2B1_BT	AGAAATGTCACAGCCATCAGCGATTTCTGGCCTCCAAATGTG
LTR/ERV1	ALTR2B1_BT	AGAAATCGCTGATGGCTGTGACATTTCTTGTTTATTGATTTG
LTR/ERV1	ALTR2B1_BT	AGAAAACCAGATATCTCAAGTTAAGGAATTTAGTGCTTTTCT
LTR/ERV1	ALTR2B1_BT	ACTGTGACATCCTTGTTTACTGATATGGCAGGAAATACTCCA
LTR/ERV1	ALTR2B1_BT	ACTGCCAAATCAATAAACAAGAAATGTCACAGCCATCAGCGA
LTR/ERV1	ALTR2B1_BT	ACTGAAATCATTCCTTTGATATGCACCTCAGCTATCTGGGGC
LTR/ERV1	ALTR2B1_BT	ACTGAAATCATTCCTTTGATATGAACTTCACATATCTGGGGC
LTR/ERV1	ALTR2B1_BT	ACTACCTGCCCTTTGTTGCAAAACTTCTATATAACCTGGCTC
LTR/ERV1	ALTR2B1_BT	ACTAAATTCCTTAACTTGAGATATCTGGTTTTCTTTAATTAA
LTR/ERV1	ALTR2B1_BT	ACCTGAAAGTAGAGAGTTATTTTATTTGGTGGGAATGTTTAG
LTR/ERV1	ALTR2B1_BT	ACCCCTGGTCTGACAGCTATCAGATTGCAGCCACTCCCTAAG
LTR/ERV1	ALTR2B1_BT	ACATTCCCACCAAATAAAATAACTCTCTACTTTCAGGTTGTG
LTR/ERV1	ALTR2B1_BT	ACATAGAAGTTTTGCAACAAAGGGCAGGTAGTCTGAATATCA
LTR/ERV1	ALTR2B1_BT	ACAAAGGGCAGGTAGTCTGAATATCAAAAGATTATGATAAAT
LTR/ERV1	ALTR2B1_BT	AATTTAGTGCTTTTCTATGTATGGGAAGATGCAAGAGTCTGG
LTR/ERV1	ALTR2B1_BT	AATTCCTTAACTTGATACCTGATCTTTGATGTTCAGACTGCC
LTR/ERV1	ALTR2B1_BT	AATTCAGGAAAGAAAAGAATACCTGCTTTCCAGCAGCCATCA
LTR/ERV1	ALTR2B1_BT	AATTCACATTTGGGAAGGCCAGAATCACAGATAGATATGACA
LTR/ERV1	ALTR2B1_BT	AATGTCACAGCCATCAGTGATTTCTGGCCTCCAAATGTGAAT
LTR/ERV1	ALTR2B1_BT	AATGTCACAGCCATCAGCGATTTCTGGCCTCCAAATGTGAAT
LTR/ERV1	ALTR2B1_BT	AATGATTTCAGTGAGCCCCGATTCTTGCATCTTTCCATATAT
LTR/ERV1	ALTR2B1_BT	AATGAATTCAGTGAGCCCAGAGGCTTGCATCTTCCCATACAT
LTR/ERV1	ALTR2B1_BT	AATCTTTTGATGTTCAGACTACCTGCCCTTTGTTGCAAAACT
LTR/ERV1	ALTR2B1_BT	AATCGGGGCTCACTGAAATCATTCCTTTGATATGAACTTCAC
LTR/ERV1	ALTR2B1_BT	AATCGCTGATGGCTGTGACATTTCTTGTTTATTGATTTGGCA
LTR/ERV1	ALTR2B1_BT	AATCAATAAACAAGAAATGTCACAGCCATCAGCGATTTCTGG
LTR/ERV1	ALTR2B1_BT	AATATCTCCTGCCATATCAATAAACAAGAAATGTCACAGCCA
LTR/ERV1	ALTR2B1_BT	AATATACCCCTGGTCTGACAGCTATCAGATTGCAGCCACTCC
LTR/ERV1	ALTR2B1_BT	AAGTTAAGGAATTTAGTGCTTTTCTATGTATGGGAAGATGCA
LTR/ERV1	ALTR2B1_BT	AAGTAGAGAGTTATTTTATTTGGTGGGAATGTTTAGGACTCC
LTR/ERV1	ALTR2B1_BT	AAGGGCAGGTAGTCTGAATATCAAAAGATTATGATAAATGAA
LTR/ERV1	ALTR2B1_BT	AAGGAATGATTTCAGTGAGCCCCGATTCTTGCATCTTTCCAT
LTR/ERV1	ALTR2B1_BT	AAGCCTCTGGGCTCACTGAATTCATTCCTTTCATATGCACCT
LTR/ERV1	ALTR2B1_BT	AAGATGCAAGAATCGGGGCTCACTGAAATCATTCCTTTGATA
LTR/ERV1	ALTR2B1_BT	AAGAATCGGGGCTCACTGAAATCATTCCTTTGATATGAACTT
LTR/ERV1	ALTR2B1_BT	AAGAAAACCAGATATCTCAAGTTAAGGAATTTAGTGCTTTTC
LTR/ERV1	ALTR2B1_BT	AACCTGAAAGTAGAGAGTTATTTTATTTGGTGGGAATGTTTA
LTR/ERV1	ALTR2B1_BT	AACATTCCCACCAAATAAAATAACTCTCTACTTTCAGGTTGT
LTR/ERV1	ALTR2B1_BT	AACAAAGGGCAGGTAGTCTGAATATCAAAAGATTATGATAAA
LTR/ERV1	ALTR2B1_BT	AAATTCCTTAACTTGATACCTGATCTTTGATGTTCAGACTGC
LTR/ERV1	ALTR2B1_BT	AAATTCAGGAAAGAAAAGAATACCTGCTTTCCAGCAGCCATC
LTR/ERV1	ALTR2B1_BT	AAATGTCACAGCCATCAGTGATTTCTGGCCTCCAAATGTGAA
LTR/ERV1	ALTR2B1_BT	AAATGTCACAGCCATCAGCGATTTCTGGCCTCCAAATGTGAA
LTR/ERV1	ALTR2B1_BT	AAATCGCTGATGGCTGTGACATTTCTTGTTTATTGATTTGGC
LTR/ERV1	ALTR2B1_BT	AAATCAATAAACAAGAAATGTCACAGCCATCAGCGATTTCTG
LTR/ERV1	ALTR2B1_BT	AAATATCTCCTGCCATATCAATAAACAAGAAATGTCACAGCC
LTR/ERV1	ALTR2B1_BT	AAAGTATTTTTGTGAATTAAAGAAAACCAGATATCTCAAGTT
LTR/ERV1	ALTR2B1_BT	AAAGGGCAGGTAGTCTGAATATCAAAAGATTATGATAAATGA
LTR/ERV1	ALTR2B1_BT	AAAGGAATGATTTCAGTGAGCCCCGATTCTTGCATCTTTCCA
LTR/ERV1	ALTR2B1_BT	AAAGATGCAAGAATCGGGGCTCACTGAAATCATTCCTTTGAT
LTR/ERV1	ALTR2B1_BT	AAACATTCCCACCAAATAAAATAACTCTCTACTTTCAGGTTG
LTR/ERV1	ALTR2B1_BT	AAAATATCTCCTGCCATATCAATAAACAAGAAATGTCACAGC
LTR/ERV1	ALTR2B1_BT	AAAAGTATTTTTGTGAATTAAAGAAAACCAGATATCTCAAGT
LTR/ERV1	ALTR2B1_BT	AAAAGCACTAAATTCCTTAACTTGAGATATCTGGTTTTCTTT
LTR/ERV1	ALTR2C_BT	GGCTGCAGTCCTCATTTTGCCCCAAATAAAACTTAACTCACA
LTR/ERV1	ALTR2C_BT	GTCCTCATTTTGCCCCAAATAAAACTTAACTCACAACTCTCA
LTR/ERV1	ALTR2C_BT	AGTTGTGAGTTAAGTTTTATTTGGGGCAAAATGAGGACTGCA
LTR/ERV1	ALTR2C_BT	GCTGCAGTCCTCATTTTGCCCCAAATAAAACTTAACTCACAA
LTR/ERV1	ALTR2C_BT	GAGTTGTGAGTTAAGTTTTATTTGGGGCAAAATGAGGACTGC
LTR/ERV1	ALTR2C_BT	CTGCAGTCCTCATTTTGCCCCAAATAAAACTTAACTCACAAC
LTR/ERV1	ALTR2C_BT	AGTCCTCATTTTGCCCCAAATAAAACTTAACTCACAACTCTC
LTR/ERV1	ALTR2C_BT	AGAGTTGTGAGTTAAGTTTTATTTGGGGCAAAATGAGGACTG
LTR/ERV1	ALTR2C_BT	ACATCCAACTATCTAAAGACCTGTCCCACCAGATTCCCTGGA
LTR/ERV1	ALTR2C_BT	CCAACTATCTAAAGACCTGTCCCACCAGATTCCCTGGAGCAC
LTR/ERV1	ALTR2C_BT	CATCCAACTATCTAAAGACCTGTCCCACCAGATTCCCTGGAG
LTR/ERV1	ALTR2C_BT	ACTATCTAAAGACCTGTCCCACCAGATTCCCTGGAGCACAGA
LTR/ERV1	ALTR2C_BT	AACTATCTAAAGACCTGTCCCACCAGATTCCCTGGAGCACAG
LTR/ERV1	ALTR2C_BT	AACATCCAACTATCTAAAGACCTGTCCCACCAGATTCCCTGG
LTR/ERV1	ALTR2C_BT	AAACATCCAACTATCTAAAGACCTGTCCCACCAGATTCCCTG
LTR/ERV1	ALTR2C_BT	AAAACATCCAACTATCTAAAGACCTGTCCCACCAGATTCCCT
LTR/ERV1	ALTR2C_BT	TCCAACTATCTAAAGACCTGTCCCACCAGATTCCCTGGAGCA
LTR/ERV1	ALTR2C_BT	GCACTCTGTGCTCCAGGGAATCTGGTGGGACAGGTCTTTAGA
LTR/ERV1	ALTR2C_BT	CAACTATCTAAAGACCTGTCCCACCAGATTCCCTGGAGCACA
LTR/ERV1	ALTR2C_BT	ATCCAACTATCTAAAGACCTGTCCCACCAGATTCCCTGGAGC
LTR/ERV1	ALTR2C_BT	GGAATCTGGTGGGACAGGTCTTTAGATAGTTGGATGTTTTTA
LTR/ERV1	ALTR2C_BT	CTATCTAAAGACCTGTCCCACCAGATTCCCTGGAGCACAGAG
LTR/ERV1	ALTR2C_BT	CTAAAAACATCCAACTATCTAAAGACCTGTCCCACCAGATTC
LTR/ERV1	ALTR2C_BT	ATCTAAAGACCTGTCCCACCAGATTCCCTGGAGCACAGAGTG
LTR/ERV1	ALTR2C_BT	AATCTGGTGGGACAGGTCTTTAGATAGTTGGATGTTTTTAGG
LTR/ERV1	ALTR2C_BT	TGCAAGGATTGAGATCATAAAATCTGTTCCTAAAAACATCCA
LTR/ERV1	ALTR2C_BT	TCTGGTGGGACAGGTCTTTAGATAGTTGGATGTTTTTAGGAA
LTR/ERV1	ALTR2C_BT	TCCTCATTTTGCCCCAAATAAAACTTAACTCACAACTCTCAA
LTR/ERV1	ALTR2C_BT	GCAAGGATTGAGATCATAAAATCTGTTCCTAAAAACATCCAA
LTR/ERV1	ALTR2C_BT	ATGCAAGGATTGAGATCATAAAATCTGTTCCTAAAAACATCC
LTR/ERV1	ALTR2C_BT	ACTCTGTGCTCCAGGGAATCTGGTGGGACAGGTCTTTAGATA
LTR/ERV1	ALTR2C_BT	ACAGGTCTTTAGATAGTTGGATGTTTTTAGGAACAGATTTTA
LTR/ERV1	ALTR2C_BT	AAAATCTGTTCCTAAAAACATCCAACTATCTAAAGACCTGTC
LTR/ERV1	ALTR2C_BT	AAAAACATCCAACTATCTAAAGACCTGTCCCACCAGATTCCC
LTR/ERV1	ALTR2C_BT	GTGGGACAGGTCTTTAGATAGTTGGATGTTTTTAGGAACAGA
LTR/ERV1	ALTR2C_BT	GATGCAAGGATTGAGATCATAAAATCTGTTCCTAAAAACATC
LTR/ERV1	ALTR2C_BT	GAGATCATAAAATCTGTTCCTAAAAACATCCAACTATCTAAA
LTR/ERV1	ALTR2C_BT	CTGGTGGGACAGGTCTTTAGATAGTTGGATGTTTTTAGGAAC
LTR/ERV1	ALTR2C_BT	CCTCATTTTGCCCCAAATAAAACTTAACTCACAACTCTCAAG
LTR/ERV1	ALTR2C_BT	ATCTGTTCCTAAAAACATCCAACTATCTAAAGACCTGTCCCA
LTR/ERV1	ALTR2C_BT	ATCTGGTGGGACAGGTCTTTAGATAGTTGGATGTTTTTAGGA
LTR/ERV1	ALTR2C_BT	AGGAGATGCAAGGATTGAGATCATAAAATCTGTTCCTAAAAA
LTR/ERV1	ALTR2C_BT	AGATGCAAGGATTGAGATCATAAAATCTGTTCCTAAAAACAT
LTR/ERV1	ALTR2C_BT	AGATCATAAAATCTGTTCCTAAAAACATCCAACTATCTAAAG
LTR/ERV1	ALTR2C_BT	AATCTGTTCCTAAAAACATCCAACTATCTAAAGACCTGTCCC
LTR/ERV1	ALTR2C_BT	AAGGATTGAGATCATAAAATCTGTTCCTAAAAACATCCAACT
LTR/ERV1	ALTR2C_BT	TGGTGGGACAGGTCTTTAGATAGTTGGATGTTTTTAGGAACA
LTR/ERV1	ALTR2C_BT	TGAGATCATAAAATCTGTTCCTAAAAACATCCAACTATCTAA
LTR/ERV1	ALTR2C_BT	TAGATAGTTGGATGTTTTTAGGAACAGATTTTATGATCTCAA
LTR/ERV1	ALTR2C_BT	GATAGTTGGATGTTTTTAGGAACAGATTTTATGATCTCAATC
LTR/ERV1	ALTR2C_BT	GAGGAGATGCAAGGATTGAGATCATAAAATCTGTTCCTAAAA
LTR/ERV1	ALTR2C_BT	GAGATGCAAGGATTGAGATCATAAAATCTGTTCCTAAAAACA
LTR/ERV1	ALTR2C_BT	CTGTTCCTAAAAACATCCAACTATCTAAAGACCTGTCCCACC
LTR/ERV1	ALTR2C_BT	CTAAAGACCTGTCCCACCAGATTCCCTGGAGCACAGAGTGCC
LTR/ERV1	ALTR2C_BT	ATAGTTGGATGTTTTTAGGAACAGATTTTATGATCTCAATCC
LTR/ERV1	ALTR2C_BT	AGGCACTCTGTGCTCCAGGGAATCTGGTGGGACAGGTCTTTA
LTR/ERV1	ALTR2C_BT	AGGATTGAGATCATAAAATCTGTTCCTAAAAACATCCAACTA
LTR/ERV1	ALTR2C_BT	AGATAGTTGGATGTTTTTAGGAACAGATTTTATGATCTCAAT
LTR/ERV1	ALTR2C_BT	ACTTGAGAGTTGTGAGTTAAGTTTTATTTGGGGCAAAATGAG
LTR/ERV1	ALTR2C_BT	AAATCTGTTCCTAAAAACATCCAACTATCTAAAGACCTGTCC
LTR/ERV1	ALTR2C_BT	TGAGGAGATGCAAGGATTGAGATCATAAAATCTGTTCCTAAA
LTR/ERV1	ALTR2C_BT	GGAGATGCAAGGATTGAGATCATAAAATCTGTTCCTAAAAAC
LTR/ERV1	ALTR2C_BT	GATCATAAAATCTGTTCCTAAAAACATCCAACTATCTAAAGA
LTR/ERV1	ALTR2C_BT	CAAGGATTGAGATCATAAAATCTGTTCCTAAAAACATCCAAC
LTR/ERV1	ALTR2C_BT	CAACTTGAGAGTTGTGAGTTAAGTTTTATTTGGGGCAAAATG
LTR/ERV1	ALTR2C_BT	ATGAGGAGATGCAAGGATTGAGATCATAAAATCTGTTCCTAA
LTR/ERV1	ALTR2C_BT	ATAAAATCTGTTCCTAAAAACATCCAACTATCTAAAGACCTG
LTR/ERV1	ALTR2C_BT	AGACCTGTCCCACCAGATTCCCTGGAGCACAGAGTGCCTCAC
LTR/ERV1	ALTR2C_BT	ACAACTTGAGAGTTGTGAGTTAAGTTTTATTTGGGGCAAAAT
LTR/ERV1	ALTR2C_BT	AAGACCTGTCCCACCAGATTCCCTGGAGCACAGAGTGCCTCA
LTR/ERV1	ALTR2C_BT	AACTTGAGAGTTGTGAGTTAAGTTTTATTTGGGGCAAAATGA
LTR/ERV1	ALTR2C_BT	AAAGACCTGTCCCACCAGATTCCCTGGAGCACAGAGTGCCTC
LTR/ERV1	ALTR2C_BT	AGGAACAGATTTTATGATCTCAATCCTTGCATCTCCTCATAT
LTR/ERV1	ALTR2C_BT	GGTCTTTAGATAGTTGGATGTTTTTAGGAACAGATTTTATGA
LTR/ERV1	ALTR2C_BT	GATTTTATGATCTCAATCCTTGCATCTCCTCATATCTAGAGA
LTR/ERV1	ALTR2C_BT	GAAGGGATTTAGTGCTTCTCTAGATATGAGGAGATGCAAGGA
LTR/ERV1	ALTR2C_BT	ATTTTATGATCTCAATCCTTGCATCTCCTCATATCTAGAGAA
LTR/ERV1	ALTR2C_BT	ATCATAAAATCTGTTCCTAAAAACATCCAACTATCTAAAGAC
LTR/ERV1	ALTR2C_BT	AGTGAGGCACTCTGTGCTCCAGGGAATCTGGTGGGACAGGTC
LTR/ERV1	ALTR2C_BT	AGGTCTTTAGATAGTTGGATGTTTTTAGGAACAGATTTTATG
LTR/ERV1	ALTR2C_BT	AACAGATTTTATGATCTCAATCCTTGCATCTCCTCATATCTA
LTR/ERV1	ALTR2C_BT	TAGGAACAGATTTTATGATCTCAATCCTTGCATCTCCTCATA
LTR/ERV1	ALTR2C_BT	TACAACTTGAGAGTTGTGAGTTAAGTTTTATTTGGGGCAAAA
LTR/ERV1	ALTR2C_BT	GATATGAGGAGATGCAAGGATTGAGATCATAAAATCTGTTCC
LTR/ERV1	ALTR2C_BT	CTTTGGAGCAGTCTCTCAGAGCTATCTGAGATGCTGCCTCCC
LTR/ERV1	ALTR2C_BT	CAGATTTTATGATCTCAATCCTTGCATCTCCTCATATCTAGA
LTR/ERV1	ALTR2C_BT	ATGTACAACTTGAGAGTTGTGAGTTAAGTTTTATTTGGGGCA
LTR/ERV1	ALTR2C_BT	AGATTTTATGATCTCAATCCTTGCATCTCCTCATATCTAGAG
LTR/ERV1	ALTR2C_BT	AGATGTACAACTTGAGAGTTGTGAGTTAAGTTTTATTTGGGG
LTR/ERV1	ALTR2C_BT	AGATATGAGGAGATGCAAGGATTGAGATCATAAAATCTGTTC
LTR/ERV1	ALTR2C_BT	ACCTGTCCCACCAGATTCCCTGGAGCACAGAGTGCCTCACTC
LTR/ERV1	ALTR2C_BT	AAGGGATTTAGTGCTTCTCTAGATATGAGGAGATGCAAGGAT
LTR/ERV1	ALTR2C_BT	TGTACAACTTGAGAGTTGTGAGTTAAGTTTTATTTGGGGCAA
LTR/ERV1	ALTR2C_BT	TGCTTCTCTAGATATGAGGAGATGCAAGGATTGAGATCATAA
LTR/ERV1	ALTR2C_BT	TAGTGCTTCTCTAGATATGAGGAGATGCAAGGATTGAGATCA
LTR/ERV1	ALTR2C_BT	GTACAACTTGAGAGTTGTGAGTTAAGTTTTATTTGGGGCAAA
LTR/ERV1	ALTR2C_BT	GGGCTGCAGTCCTCATTTTGCCCCAAATAAAACTTAACTCAC
LTR/ERV1	ALTR2C_BT	GCTTCTCTAGATATGAGGAGATGCAAGGATTGAGATCATAAA
LTR/ERV1	ALTR2C_BT	CCTTGCATCTCCTCATATCTAGAGAAGCACTAAATCCCTTCA
LTR/ERV1	ALTR2C_BT	CCTGTCCCACCAGATTCCCTGGAGCACAGAGTGCCTCACTCC
LTR/ERV1	ALTR2C_BT	AGCACTAAATCCCTTCATGGTGACATCAGATCCTCATGACTA
LTR/ERV1	ALTR2C_BT	ACAGATTTTATGATCTCAATCCTTGCATCTCCTCATATCTAG
LTR/ERV1	ALTR2C_BT	AATCCTTGCATCTCCTCATATCTAGAGAAGCACTAAATCCCT
LTR/ERV1	ALTR2C_BT	AAGCACTAAATCCCTTCATGGTGACATCAGATCCTCATGACT
LTR/ERV1	ALTR2C_BT	AAGATGTACAACTTGAGAGTTGTGAGTTAAGTTTTATTTGGG
LTR/ERV1	ALTR2C_BT	TAAATCCCTTCATGGTGACATCAGATCCTCATGACTAACAAA
LTR/ERV1	ALTR2C_BT	GTGGAGTGAGGCACTCTGTGCTCCAGGGAATCTGGTGGGACA
LTR/ERV1	ALTR2C_BT	GTGCTTCTCTAGATATGAGGAGATGCAAGGATTGAGATCATA
LTR/ERV1	ALTR2C_BT	GGTGGAGTGAGGCACTCTGTGCTCCAGGGAATCTGGTGGGAC
LTR/ERV1	ALTR2C_BT	GCTTTGGAGCAGTCTCTCAGAGCTATCTGAGATGCTGCCTCC
LTR/ERV1	ALTR2C_BT	GCACTAAATCCCTTCATGGTGACATCAGATCCTCATGACTAA
LTR/ERV1	ALTR2C_BT	GATCTCAATCCTTGCATCTCCTCATATCTAGAGAAGCACTAA
LTR/ERV1	ALTR2C_BT	CTTCTCTAGATATGAGGAGATGCAAGGATTGAGATCATAAAA
LTR/ERV1	ALTR2C_BT	CTGTCCCACCAGATTCCCTGGAGCACAGAGTGCCTCACTCCA
LTR/ERV1	ALTR2C_BT	CTAAATCCCTTCATGGTGACATCAGATCCTCATGACTAACAA
LTR/ERV1	ALTR2C_BT	CATGAAGGGATTTAGTGCTTCTCTAGATATGAGGAGATGCAA
LTR/ERV1	ALTR2C_BT	ATGAAGGGATTTAGTGCTTCTCTAGATATGAGGAGATGCAAG
LTR/ERV1	ALTR2C_BT	ATCTCAATCCTTGCATCTCCTCATATCTAGAGAAGCACTAAA
LTR/ERV1	ALTR2C_BT	AGTGCTTCTCTAGATATGAGGAGATGCAAGGATTGAGATCAT
LTR/ERV1	ALTR2C_BT	AAATCCCTTCATGGTGACATCAGATCCTCATGACTAACAAAA
LTR/ERV1	ALTR2C_BT	AAAGATGTACAACTTGAGAGTTGTGAGTTAAGTTTTATTTGG
LTR/ERV1	ALTR2C_BT	GTGCTTCATGGTATTGAACTCCCCCTTCACCAAAACCTTATA
LTR/ERV1	ALTR2C_BT	GGGTGGAGTGAGGCACTCTGTGCTCCAGGGAATCTGGTGGGA
LTR/ERV1	ALTR2C_BT	GGATTTAGTGCTTCTCTAGATATGAGGAGATGCAAGGATTGA
LTR/ERV1	ALTR2C_BT	GAGTGCTTCATGGTATTGAACTCCCCCTTCACCAAAACCTTA
LTR/ERV1	ALTR2C_BT	CTCAATCCTTGCATCTCCTCATATCTAGAGAAGCACTAAATC
LTR/ERV1	ALTR2C_BT	CTAGAGAAGCACTAAATCCCTTCATGGTGACATCAGATCCTC
LTR/ERV1	ALTR2C_BT	CCATGAAGGGATTTAGTGCTTCTCTAGATATGAGGAGATGCA
LTR/ERV1	ALTR2C_BT	CACTAAATCCCTTCATGGTGACATCAGATCCTCATGACTAAC
LTR/ERV1	ALTR2C_BT	CAATCCTTGCATCTCCTCATATCTAGAGAAGCACTAAATCCC
LTR/ERV1	ALTR2C_BT	ATTTAGTGCTTCTCTAGATATGAGGAGATGCAAGGATTGAGA
LTR/ERV1	ALTR2C_BT	ATCTCCTCATATCTAGAGAAGCACTAAATCCCTTCATGGTGA
LTR/ERV1	ALTR2C_BT	AGTGCTTCATGGTATTGAACTCCCCCTTCACCAAAACCTTAT
LTR/ERV1	ALTR2C_BT	AGGGTGGAGTGAGGCACTCTGTGCTCCAGGGAATCTGGTGGG
LTR/ERV1	ALTR2C_BT	AGGATCTGATGTCACCATGAAGGGATTTAGTGCTTCTCTAGA
LTR/ERV1	ALTR2C_BT	ACTAAATCCCTTCATGGTGACATCAGATCCTCATGACTAACA
LTR/ERV1	ALTR2C_BT	AATCCCTTCATGGTGACATCAGATCCTCATGACTAACAAAAA
LTR/ERV1	ALTR2C_BT	AAGGTTTTGGTGAAGGGGGAGTTCAATACCATGAAGCACTCA
LTR/ERV1	ALTR2C_BT	TAGAGAAGCACTAAATCCCTTCATGGTGACATCAGATCCTCA
LTR/ERV1	ALTR2C_BT	GATGTACAACTTGAGAGTTGTGAGTTAAGTTTTATTTGGGGC
LTR/ERV1	ALTR2C_BT	GAAGCACTAAATCCCTTCATGGTGACATCAGATCCTCATGAC
LTR/ERV1	ALTR2C_BT	CATGAGGATCTGATGTCACCATGAAGGGATTTAGTGCTTCTC
LTR/ERV1	ALTR2C_BT	CATATCTAGAGAAGCACTAAATCCCTTCATGGTGACATCAGA
LTR/ERV1	ALTR2C_BT	CAGGGTGGAGTGAGGCACTCTGTGCTCCAGGGAATCTGGTGG
LTR/ERV1	ALTR2C_BT	CACCATGAAGGGATTTAGTGCTTCTCTAGATATGAGGAGATG
LTR/ERV1	ALTR2C_BT	CACCAGATTCCCTGGAGCACAGAGTGCCTCACTCCACCCTGA
LTR/ERV1	ALTR2C_BT	ATGGTATTGAACTCCCCCTTCACCAAAACCTTATATATTGAC
LTR/ERV1	ALTR2C_BT	ATCTAGAGAAGCACTAAATCCCTTCATGGTGACATCAGATCC
LTR/ERV1	ALTR2C_BT	ATATATAAGGTTTTGGTGAAGGGGGAGTTCAATACCATGAAG
LTR/ERV1	ALTR2C_BT	ATATAAGGTTTTGGTGAAGGGGGAGTTCAATACCATGAAGCA
LTR/ERV1	ALTR2C_BT	AGATTCCCTGGAGCACAGAGTGCCTCACTCCACCCTGAACTC
LTR/ERV1	ALTR2C_BT	AGAGAAGCACTAAATCCCTTCATGGTGACATCAGATCCTCAT
LTR/ERV1	ALTR2C_BT	AGAAGCACTAAATCCCTTCATGGTGACATCAGATCCTCATGA
LTR/ERV1	ALTR2C_BT	AAAAGATGTACAACTTGAGAGTTGTGAGTTAAGTTTTATTTG
LTR/ERV1	ALTR2C_BT	GCTTCATGGTATTGAACTCCCCCTTCACCAAAACCTTATATA
LTR/ERV1	ALTR2C_BT	GATTCCCTGGAGCACAGAGTGCCTCACTCCACCCTGAACTCC
LTR/ERV1	ALTR2C_BT	GATCTGATGTCACCATGAAGGGATTTAGTGCTTCTCTAGATA
LTR/ERV1	ALTR2C_BT	CTTTTGTAAAATGAGTGCTTCATGGTATTGAACTCCCCCTTC
LTR/ERV1	ALTR2C_BT	CTCCTCATATCTAGAGAAGCACTAAATCCCTTCATGGTGACA
LTR/ERV1	ALTR2C_BT	CTCATATCTAGAGAAGCACTAAATCCCTTCATGGTGACATCA
LTR/ERV1	ALTR2C_BT	CCTCATATCTAGAGAAGCACTAAATCCCTTCATGGTGACATC
LTR/ERV1	ALTR2C_BT	CAATATATAAGGTTTTGGTGAAGGGGGAGTTCAATACCATGA
LTR/ERV1	ALTR2C_BT	ATGTCACCATGAAGGGATTTAGTGCTTCTCTAGATATGAGGA
LTR/ERV1	ALTR2C_BT	AGTTCAGGGTGGAGTGAGGCACTCTGTGCTCCAGGGAATCTG
LTR/ERV1	ALTR2C_BT	AGTTAAGTTTTATTTGGGGCAAAATGAGGACTGCAGCCCAGG
LTR/ERV1	ALTR2C_BT	AGGTTTTGGTGAAGGGGGAGTTCAATACCATGAAGCACTCAT
LTR/ERV1	ALTR2C_BT	ACCATGAAGGGATTTAGTGCTTCTCTAGATATGAGGAGATGC
LTR/ERV1	ALTR2C_BT	ACCAGATTCCCTGGAGCACAGAGTGCCTCACTCCACCCTGAA
LTR/ERV1	ALTR2C_BT	AATGAGTGCTTCATGGTATTGAACTCCCCCTTCACCAAAACC
LTR/ERV1	ALTR2C_BT	AATATATAAGGTTTTGGTGAAGGGGGAGTTCAATACCATGAA
LTR/ERV1	ALTR2C_BT	AAAAAGATGTACAACTTGAGAGTTGTGAGTTAAGTTTTATTT
LTR/ERV1	ALTR2C_BT	TGGTGAAGGGGGAGTTCAATACCATGAAGCACTCATTTTACA
LTR/ERV1	ALTR2C_BT	TGAAGGGGGAGTTCAATACCATGAAGCACTCATTTTACAAAA
LTR/ERV1	ALTR2C_BT	TAAAATGAGTGCTTCATGGTATTGAACTCCCCCTTCACCAAA
LTR/ERV1	ALTR2C_BT	GTTAAGTTTTATTTGGGGCAAAATGAGGACTGCAGCCTGGGA
LTR/ERV1	ALTR2C_BT	GTTAAGTTTTATTTGGGGCAAAATGAGGACTGCAGCCCAGGA
LTR/ERV1	ALTR2C_BT	GTCACCATGAAGGGATTTAGTGCTTCTCTAGATATGAGGAGA
LTR/ERV1	ALTR2C_BT	GTAAAATGAGTGCTTCATGGTATTGAACTCCCCCTTCACCAA
LTR/ERV1	ALTR2C_BT	CTGGGCTGCAGTCCTCATTTTGCCCCAAATAAAACTTAACTC
LTR/ERV1	ALTR2C_BT	CTGATGTCACCATGAAGGGATTTAGTGCTTCTCTAGATATGA
LTR/ERV1	ALTR2C_BT	CTCCTGGGCTGCAGTCCTCATTTTGCCCCAAATAAAACTTAA
LTR/ERV1	ALTR2C_BT	CCTGGAGCACAGAGTGCCTCACTCCACCCTGAACTCCCTCAG
LTR/ERV1	ALTR2C_BT	CCTGAGGGAGTTCAGGGTGGAGTGAGGCACTCTGTGCTCCAG
LTR/ERV1	ALTR2C_BT	CCCTGAGGGAGTTCAGGGTGGAGTGAGGCACTCTGTGCTCCA
LTR/ERV1	ALTR2C_BT	CCAGGCTGCAGTCCTCATTTTGCCCCAAATAAAACTTAACTC
LTR/ERV1	ALTR2C_BT	CCAGATTCCCTGGAGCACAGAGTGCCTCACTCCACCCTGAAC
LTR/ERV1	ALTR2C_BT	CATGGTATTGAACTCCCCCTTCACCAAAACCTTATATATTGA
LTR/ERV1	ALTR2C_BT	AGTTAAGTTTTATTTGGGGCAAAATGAGGACTGCAGCCTGGG
LTR/ERV1	ALTR2C_BT	AAGGGGGAGTTCAATACCATGAAGCACTCATTTTACAAAAGG
LTR/ERV1	ALTR2C_BT	AAATGAGTGCTTCATGGTATTGAACTCCCCCTTCACCAAAAC
LTR/ERV1	ALTR2C_BT	AAAATGAGTGCTTCATGGTATTGAACTCCCCCTTCACCAAAA
LTR/ERV1	ALTR2C_BT	AAAAAAGATGTACAACTTGAGAGTTGTGAGTTAAGTTTTATT
LTR/ERV1	ALTR2C_BT	GTTTTTTGTTAGTCATGAGGATCTGATGTCACCATGAAGGGA
LTR/ERV1	ALTR2C_BT	GTGAAGGGGGAGTTCAATACCATGAAGCACTCATTTTACAAA
LTR/ERV1	ALTR2C_BT	GGTGACATCAGATCCTCATGACTAACAAAAAACCTTTTGTAA
LTR/ERV1	ALTR2C_BT	GGTGAAGGGGGAGTTCAATACCATGAAGCACTCATTTTACAA
LTR/ERV1	ALTR2C_BT	GAGGGAGTTCAGGGTGGAGTGAGGCACTCTGTGCTCCAGGGA
LTR/ERV1	ALTR2C_BT	CTGATGTCACCATGAAGGGATTTAGTGCTTTTCTAGATATGA
LTR/ERV1	ALTR2C_BT	CTCCCAGGCTGCAGTCCTCATTTTGCCCCAAATAAAACTTAA
LTR/ERV1	ALTR2C_BT	CCCTTCATGGTGACATCAGATCCTCATGACTAACAAAAAACC
LTR/ERV1	ALTR2C_BT	CCCTGGAGCACAGAGTGCCTCACTCCACCCTGAACTCCCTCA
LTR/ERV1	ALTR2C_BT	CAGGCTGCAGTCCTCATTTTGCCCCAAATAAAACTTAACTCA
LTR/ERV1	ALTR2C_BT	ATTCCCTGGAGCACAGAGTGCCTCACTCCACCCTGAACTCCC
LTR/ERV1	ALTR2C_BT	ATCCCTTCATGGTGACATCAGATCCTCATGACTAACAAAAAA
LTR/ERV1	ALTR2C_BT	ATCAGATCCTCATGACTAACAAAAAACCTTTTGTAAAATGAG
LTR/ERV1	ALTR2C_BT	ATATCTAGAGAAGCACTAAATCCCTTCATGGTGACATCAGAT
LTR/ERV1	ALTR2C_BT	AGGTTTTTTGTTAGTCATGAGGATCTGATGTCACCATGAAGG
LTR/ERV1	ALTR2C_BT	AGGGAGTTCAGGGTGGAGTGAGGCACTCTGTGCTCCAGGGAA
LTR/ERV1	ALTR2C_BT	AGGCTGCAGTCCTCATTTTGCCCCAAATAAAACTTAACTCAC
LTR/ERV1	ALTR2C_BT	ACTCATTTTACAAAAGGTTTTTTGTTAGTCATGAGGATCTGA
LTR/ERV1	ALTR2C_BT	AAGGTTTTTTGTTAGTCATGAGGATCTGATGTCACCATGAAG
LTR/ERV1	ALTR2C_BT	AAAGGTTTTTTGTTAGTCATGAGGATCTGATGTCACCATGAA
LTR/ERV1	ALTR2C_BT	AAAAGGTTTTTTGTTAGTCATGAGGATCTGATGTCACCATGA
LTR/ERV1	ALTR2C_BT	TCAGATAGCTCTGAGAGACTGCTCCAAAGCGGCAGTGGGGGA
LTR/ERV1	ALTR2C_BT	TACAAAAGGTTTTTTGTTAGTCATGAGGATCTGATGTCACCA
LTR/ERV1	ALTR2C_BT	GTGACATCAGATCCTCATGACTAACAAAAAACCTTTTGTAAA
LTR/ERV1	ALTR2C_BT	CACTCATTTTACAAAAGGTTTTTTGTTAGTCATGAGGATCTG
LTR/ERV1	ALTR2C_BT	CAAAAGGTTTTTTGTTAGTCATGAGGATCTGATGTCACCATG
LTR/ERV1	ALTR2C_BT	AGCACTCATTTTACAAAAGGTTTTTTGTTAGTCATGAGGATC
LTR/ERV1	ALTR2C_BT	AGATCCTCATGACTAACAAAAAACCTTTTGTAAAATGAGTGC
LTR/ERV1	ALTR2C_BT	ACCTTTTGTAAAATGAGTGCTTCATGGTATTGAACTCCCCCT
LTR/ERV1	ALTR2C_BT	ACAAAAGGTTTTTTGTTAGTCATGAGGATCTGATGTCACCAT
LTR/ERV1	ALTR2C_BT	AAGCACTCATTTTACAAAAGGTTTTTTGTTAGTCATGAGGAT
LTR/ERV1	ALTR2C_BT	AACCTTTTGTAAAATGAGTGCTTCATGGTATTGAACTCCCCC
LTR/ERV1	ALTR2C_BT	AAACCTTTTGTAAAATGAGTGCTTCATGGTATTGAACTCCCC
LTR/ERV1	ALTR2C_BT	AAAACCTTTTGTAAAATGAGTGCTTCATGGTATTGAACTCCC
LTR/ERV1	ALTR2C_BT	AAAAACCTTTTGTAAAATGAGTGCTTCATGGTATTGAACTCC
LTR/ERV1	ALTR2C_BT	TGGGAGGCAGCATCTCAGATAGCTCTGAGAGACTGCTCCAAA
LTR/ERV1	ALTR2C_BT	TGACATCAGATCCTCATGACTAACAAAAAACCTTTTGTAAAA
LTR/ERV1	ALTR2C_BT	TACCATGAAGCACTCATTTTACAAAAGGTTTTTTGTTAGTCA
LTR/ERV1	ALTR2C_BT	GAAGCACTCATTTTACAAAAGGTTTTTTGTTAGTCATGAGGA
LTR/ERV1	ALTR2C_BT	CCTCATGACTAACAAAAAACCTTTTGTAAAATGAGTGCTTCA
LTR/ERV1	ALTR2C_BT	CCCCTGAGGGAGTTCAGGGTGGAGTGAGGCACTCTGTGCTCC
LTR/ERV1	ALTR2C_BT	CCCCCACTGCCGCTTTGGAGCAGTCTCTCAGAGCTATCTGAG
LTR/ERV1	ALTR2C_BT	CATGACTAACAAAAAACCTTTTGTAAAATGAGTGCTTCATGG
LTR/ERV1	ALTR2C_BT	CATGAAGCACTCATTTTACAAAAGGTTTTTTGTTAGTCATGA
LTR/ERV1	ALTR2C_BT	CATCAGATCCTCATGACTAACAAAAAACCTTTTGTAAAATGA
LTR/ERV1	ALTR2C_BT	CAGATAGCTCTGAGAGACTGCTCCAAAGCGGCAGTGGGGGAA
LTR/ERV1	ALTR2C_BT	ATTTTACAAAAGGTTTTTTGTTAGTCATGAGGATCTGATGTC
LTR/ERV1	ALTR2C_BT	ATTGAACTCCCCCTTCACCAAAACCTTATATATTGACTTTCC
LTR/ERV1	ALTR2C_BT	ATGAAGCACTCATTTTACAAAAGGTTTTTTGTTAGTCATGAG
LTR/ERV1	ALTR2C_BT	ATACCATGAAGCACTCATTTTACAAAAGGTTTTTTGTTAGTC
LTR/ERV1	ALTR2C_BT	AGTTTTATTTGGGGCAAAATGAGGACTGCAGCCCAGGAGGCA
LTR/ERV1	ALTR2C_BT	AGTGGGGGAAAGTCAATATATAAGGTTTTGGTGAAGGGGGAG
LTR/ERV1	ALTR2C_BT	AGCTGTTGACCTTCAACAACCCCTGAGGGAGTTCAGGGTGGA
LTR/ERV1	ALTR2C_BT	ACTCCCCCTTCACCAAAACCTTATATATTGACTTTCCCCCAC
LTR/ERV1	ALTR2C_BT	ACCATGAAGCACTCATTTTACAAAAGGTTTTTTGTTAGTCAT
LTR/ERV1	ALTR2C_BT	TAACAAAAAACCTTTTGTAAAATGAGTGCTTCATGGTATTGA
LTR/ERV1	ALTR2C_BT	GTTAAGTTTTATTTGGGGCAAAATGAGGACTGCAGCCCGGGA
LTR/ERV1	ALTR2C_BT	GGGGAAAGTCAATATATAAGGTTTTGGTGAAGGGGGAGTTCA
LTR/ERV1	ALTR2C_BT	GGGAAAGTCAATATATAAGGTTTTGGTGAAGGGGGAGTTCAA
LTR/ERV1	ALTR2C_BT	GCCTGGGAGGCAGCATCTCAGATAGCTCTGAGAGACTGCTCC
LTR/ERV1	ALTR2C_BT	GCAGCCTGGGAGGCAGCATCTCAGATAGCTCTGAGAGACTGC
LTR/ERV1	ALTR2C_BT	GACCTTCAACAACCCCTGAGGGAGTTCAGGGTGGAGTGAGGC
LTR/ERV1	ALTR2C_BT	GAACTCCCCCTTCACCAAAACCTTATATATTGACTTTCCCCC
LTR/ERV1	ALTR2C_BT	GAAAGTCAATATATAAGGTTTTGGTGAAGGGGGAGTTCAATA
LTR/ERV1	ALTR2C_BT	CTGGGAGGCAGCATCTCAGATAGCTCTGAGAGACTGCTCCAA
LTR/ERV1	ALTR2C_BT	CTGAACTCCCTCAGGGGTTGTTGAAGGTCAACAGCTATAGCA
LTR/ERV1	ALTR2C_BT	CTCCACCCTGAACTCCCTCAGGGGTTGTTGAAGGTCAACAGC
LTR/ERV1	ALTR2C_BT	CTATCTGAGATGCTGCCTCCCAGGCTGCAGTCCTCATTTTGC
LTR/ERV1	ALTR2C_BT	CGGGCTGCAGTCCTCATTTTGCCCCAAATAAAACTTAACTCA
LTR/ERV1	ALTR2C_BT	CCTGAACTCCCTCAGGGGTTGTTGAAGGTCAACAGCTATAGC
LTR/ERV1	ALTR2C_BT	CCTCCTGGGCTGCAGTCCTCATTTTGCCCCAAATAAAACTTA
LTR/ERV1	ALTR2C_BT	CCGGGCTGCAGTCCTCATTTTGCCCCAAATAAAACTTAACTC
LTR/ERV1	ALTR2C_BT	CCCCCTTCACCAAAACCTTATATATTGACTTTCCCCCACTGC
LTR/ERV1	ALTR2C_BT	CCCCACTGCCGCTTTGGAGCAGTCTCTCAGAGCTATCTGAGA
LTR/ERV1	ALTR2C_BT	CAGTGGGGGAAAGTCAATATATAAGGTTTTGGTGAAGGGGGA
LTR/ERV1	ALTR2C_BT	CAGTCTCTCAGAGCTATCTGAGATGCTGCCTCCCAGGCTGCA
LTR/ERV1	ALTR2C_BT	CACCATGAAGGGATTTAGTGCTTTTCTAGATATGAGGAGATG
LTR/ERV1	ALTR2C_BT	CAATACCATGAAGCACTCATTTTACAAAAGGTTTTTTGTTAG
LTR/ERV1	ALTR2C_BT	CAACCCCTGAGGGAGTTCAGGGTGGAGTGAGGCACTCTGTGC
LTR/ERV1	ALTR2C_BT	ATCTCCTCATATCTAGAAAAGCACTAAATCCCTTCATGGTGA
LTR/ERV1	ALTR2C_BT	ATCTCAGATAGCTCTGAGAGACTGCTCCAAAGCGGCAGTGGG
LTR/ERV1	ALTR2C_BT	AGTTCAATACCATGAAGCACTCATTTTACAAAAGGTTTTTTG
LTR/ERV1	ALTR2C_BT	AGTTAAGTTTTATTTGGGGCAAAATGAGGACTGCAGCCCGGG
LTR/ERV1	ALTR2C_BT	AGTCAATATATAAGGTTTTGGTGAAGGGGGAGTTCAATACCA
LTR/ERV1	ALTR2C_BT	AGCCTGGGAGGCAGCATCTCAGATAGCTCTGAGAGACTGCTC
LTR/ERV1	ALTR2C_BT	ACCTTCAACAACCCCTGAGGGAGTTCAGGGTGGAGTGAGGCA
LTR/ERV1	ALTR2C_BT	ACCCCTGAGGGAGTTCAGGGTGGAGTGAGGCACTCTGTGCTC
LTR/ERV1	ALTR2C_BT	ACATCAGATCCTCATGACTAACAAAAAACCTTTTGTAAAATG
LTR/ERV1	ALTR2C_BT	ACAACCCCTGAGGGAGTTCAGGGTGGAGTGAGGCACTCTGTG
LTR/ERV1	ALTR2C_BT	ACAAAAAACCTTTTGTAAAATGAGTGCTTCATGGTATTGAAC
LTR/ERV1	ALTR2C_BT	AATACCATGAAGCACTCATTTTACAAAAGGTTTTTTGTTAGT
LTR/ERV1	ALTR2C_BT	AAGTTTTATTTGGGGCAAAATGAGGACTGCAGCCCAGGAGGC
LTR/ERV1	ALTR2C_BT	AAGTCAATATATAAGGTTTTGGTGAAGGGGGAGTTCAATACC
LTR/ERV1	ALTR2C_BT	AACTCCCCCTTCACCAAAACCTTATATATTGACTTTCCCCCA
LTR/ERV1	ALTR2C_BT	AACCCCTGAGGGAGTTCAGGGTGGAGTGAGGCACTCTGTGCT
LTR/ERV1	ALTR2C_BT	AACAAAAAACCTTTTGTAAAATGAGTGCTTCATGGTATTGAA
LTR/ERV1	ALTR2C_BT	AAAGTCAATATATAAGGTTTTGGTGAAGGGGGAGTTCAATAC
LTR/ERV1	ALTR2C_BT	AAAAAACCTTTTGTAAAATGAGTGCTTCATGGTATTGAACTC
LTR/ERV1	ALTR2C_BT	TGAGTTAAGTTTTATTTGGGGCAAAATGAGGACTGCAGCCCA
LTR/ERV1	ALTR2C_BT	TCAGAGCTATCTGAGATGCTGCCTCCCAGGCTGCAGTCCTCA
LTR/ERV1	ALTR2C_BT	TAGAGGCAGATGGCAAATGCCTTTGTTGTTCAGTCATTGGCA
LTR/ERV1	ALTR2C_BT	GTTGACCTTCAACAACCCCTGAGGGAGTTCAGGGTGGAGTGA
LTR/ERV1	ALTR2C_BT	GTCACCATGAAGGGATTTAGTGCTTTTCTAGATATGAGGAGA
LTR/ERV1	ALTR2C_BT	GGCAAAATGAGGACTGCAGCCTGGGAGGCAGCATCTCAGATA
LTR/ERV1	ALTR2C_BT	GCTGCTTTGGAGCAGTCTCTCAGAGCTATCTGAGATGCTGCC
LTR/ERV1	ALTR2C_BT	GCCGCTTTGGAGCAGTCTCTCAGAGCTATCTGAGATGCTGCC
LTR/ERV1	ALTR2C_BT	GCAGCATCTCAGATAGCTCTGAGAGACTGCTCCAAAGCGGCA
LTR/ERV1	ALTR2C_BT	GAGGCAGCATCTCAGATAGCTCTGAGAGACTGCTCCAAAGCA
LTR/ERV1	ALTR2C_BT	GACTGCAGCCTGGGAGGCAGCATCTCAGATAGCTCTGAGAGA
LTR/ERV1	ALTR2C_BT	CTGCCTCCTGGGCTGCAGTCCTCATTTTGCCCCAAATAAAAC
LTR/ERV1	ALTR2C_BT	CTCTCAGAGCTATCTGAGATGCTGCCTCCCAGGCTGCAGTCC
LTR/ERV1	ALTR2C_BT	CTCCTCATATCTAGAAAAGCACTAAATCCCTTCATGGTGACA
LTR/ERV1	ALTR2C_BT	CTCCCGGGCTGCAGTCCTCATTTTGCCCCAAATAAAACTTAA
LTR/ERV1	ALTR2C_BT	CTCAGAGCTATCTGAGATGCTGCCTCCCAGGCTGCAGTCCTC
LTR/ERV1	ALTR2C_BT	CTCACTCCACCCTGAACTCCCTCAGGGGTTGTTGAAGGTCAA
LTR/ERV1	ALTR2C_BT	CGCTTTGGAGCAGTCTCTCAGAGCTATCTGAGATGCTGCCTC
LTR/ERV1	ALTR2C_BT	CCTTCAACAACCCCTGAGGGAGTTCAGGGTGGAGTGAGGCAC
LTR/ERV1	ALTR2C_BT	CCTGGGAGGCAGCATCTCAGATAGCTCTGAGAGACTGCTCCA
LTR/ERV1	ALTR2C_BT	CCTCACTCCACCCTGAACTCCCTCAGGGGTTGTTGAAGGTCA
LTR/ERV1	ALTR2C_BT	CCACCCTGAACTCCCTCAGGGGTTGTTGAAGGTCAACAGCTA
LTR/ERV1	ALTR2C_BT	CATCTCAGATAGCTCTGAGAGACTGCTCCAAAGCGGCAGTGG
LTR/ERV1	ALTR2C_BT	CAGCATCTCAGATAGCTCTGAGAGACTGCTCCAAAGCGGCAG
LTR/ERV1	ALTR2C_BT	CACTGCCGCTTTGGAGCAGTCTCTCAGAGCTATCTGAGATGC
LTR/ERV1	ALTR2C_BT	CACTCCACCCTGAACTCCCTCAGGGGTTGTTGAAGGTCAACA
LTR/ERV1	ALTR2C_BT	CAAAATGAGGACTGCAGCCTGGGAGGCAGCATCTCAGATAGC
LTR/ERV1	ALTR2C_BT	CAAAATGAGGACTGCAGCCCGGGAGGCAGCATCTCAGATAGC
LTR/ERV1	ALTR2C_BT	ATTGCCAATGACTGAACAACAAAGGCATTTGCCATCTGCCTC
LTR/ERV1	ALTR2C_BT	ATGTCACCATGAAGGGATTTAGTGCTTTTCTAGATATGAGGA
LTR/ERV1	ALTR2C_BT	ATGAGGACTGCAGCCTGGGAGGCAGCATCTCAGATAGCTCTG
LTR/ERV1	ALTR2C_BT	ATAGCTGTTGACCTTCAACAACCCCTGAGGGAGTTCAGGGTG
LTR/ERV1	ALTR2C_BT	AGTGCCTCACTCCACCCTGAACTCCCTCAGGGGTTGTTGAAG
LTR/ERV1	ALTR2C_BT	AGTCTCTCAGAGCTATCTGAGATGCTGCCTCCCAGGCTGCAG
LTR/ERV1	ALTR2C_BT	AGGCAGCATCTCAGATAGCTCTGAGAGACTGCTCCAAAGCGG
LTR/ERV1	ALTR2C_BT	AGGCAGCATCTCAGATAGCTCTGAGAGACTGCTCCAAAGCAG
LTR/ERV1	ALTR2C_BT	AGGCAGATGGCAAATGCCTTTGTTGTTCAGTCATTGGCAATG
LTR/ERV1	ALTR2C_BT	AGGACTGCAGCCTGGGAGGCAGCATCTCAGATAGCTCTGAGA
LTR/ERV1	ALTR2C_BT	AGCAGTCTCTCAGAGCTATCTGAGATGCTGCCTCCCAGGCTG
LTR/ERV1	ALTR2C_BT	AGAGGCAGATGGCAAATGCCTTTGTTGTTCAGTCATTGGCAA
LTR/ERV1	ALTR2C_BT	ACTGCCGCTTTGGAGCAGTCTCTCAGAGCTATCTGAGATGCT
LTR/ERV1	ALTR2C_BT	ACTGCAGCCTGGGAGGCAGCATCTCAGATAGCTCTGAGAGAC
LTR/ERV1	ALTR2C_BT	ACTCCACCCTGAACTCCCTCAGGGGTTGTTGAAGGTCAACAG
LTR/ERV1	ALTR2C_BT	ACCCTGAACTCCCTCAGGGGTTGTTGAAGGTCAACAGCTATA
LTR/ERV1	ALTR2C_BT	AATTGGCACTTACCAAGAGCATTGCCAATGACTGAACAACAA
LTR/ERV1	ALTR2C_BT	AATGAGGACTGCAGCCTGGGAGGCAGCATCTCAGATAGCTCT
LTR/ERV1	ALTR2C_BT	AATGAGGACTGCAGCCCGGGAGGCAGCATCTCAGATAGCTCT
LTR/ERV1	ALTR2C_BT	AAATGAGGACTGCAGCCTGGGAGGCAGCATCTCAGATAGCTC
LTR/ERV1	ALTR2C_BT	AAATGAGGACTGCAGCCCGGGAGGCAGCATCTCAGATAGCTC
LTR/ERV1	ALTR2C_BT	AAAATGAGGACTGCAGCCCGGGAGGCAGCATCTCAGATAGCT
LTR/ERV1	ALTR2C_BT	TGCTGCCTCCTGGGCTGCAGTCCTCATTTTGCCCCAAATAAA
LTR/ERV1	ALTR2C_BT	TGAGATGCTGCCTCCCGGGCTGCAGTCCTCATTTTGCCCCAA
LTR/ERV1	ALTR2C_BT	TCAGAGCTATCTGAGATGCTGCCTCCCGGGCTGCAGTCCTCA
LTR/ERV1	ALTR2C_BT	TATATTGACTTTCCCCCACTGCTGCTTTGGAGCAGTCTCTCA
LTR/ERV1	ALTR2C_BT	GGGGCAAAATGAGGACTGCAGCCTGGGAGGCAGCATCTCAGA
LTR/ERV1	ALTR2C_BT	GGGGCAAAATGAGGACTGCAGCCCGGGAGGCAGCATCTCAGA
LTR/ERV1	ALTR2C_BT	GGCAAAATGAGGACTGCAGCCCGGGAGGCAGCATCTCAGATA
LTR/ERV1	ALTR2C_BT	GCTGCCTCCTGGGCTGCAGTCCTCATTTTGCCCCAAATAAAA
LTR/ERV1	ALTR2C_BT	GCTGCCTCCCAGGCTGCAGTCCTCATTTTGCCCCAAATAAAA
LTR/ERV1	ALTR2C_BT	GCCCGGGAGGCAGCATCTCAGATAGCTCTGAGAGACTGCTCC
LTR/ERV1	ALTR2C_BT	GCAGCCCGGGAGGCAGCATCTCAGATAGCTCTGAGAGACTGC
LTR/ERV1	ALTR2C_BT	GCAGCATCTCAGATAGCTCTGAGAGACTGCTCCAAAGCAGCA
LTR/ERV1	ALTR2C_BT	GAGTGCCTCACTCCACCCTGAACTCCCTCAGGGGTTGTTGAA
LTR/ERV1	ALTR2C_BT	GAGACTGCTCCAAAGCAGCAGTGGGGGAAAGTCAATATATAA
LTR/ERV1	ALTR2C_BT	GACTGCAGCCCGGGAGGCAGCATCTCAGATAGCTCTGAGAGA
LTR/ERV1	ALTR2C_BT	CTGCTATAGCTGTTGACCTTCAACAACCCCTGAGGGAGTTCA
LTR/ERV1	ALTR2C_BT	CTGCCTCCCAGGCTGCAGTCCTCATTTTGCCCCAAATAAAAC
LTR/ERV1	ALTR2C_BT	CTGAGATGCTGCCTCCCGGGCTGCAGTCCTCATTTTGCCCCA
LTR/ERV1	ALTR2C_BT	CTGAGATGCTGCCTCCCAGGCTGCAGTCCTCATTTTGCCCCA
LTR/ERV1	ALTR2C_BT	CTCTCAGAGCTATCTGAGATGCTGCCTCCCGGGCTGCAGTCC
LTR/ERV1	ALTR2C_BT	CTCATATCTAGAAAAGCACTAAATCCCTTCATGGTGACATCA
LTR/ERV1	ALTR2C_BT	CTCAGAGCTATCTGAGATGCTGCCTCCCGGGCTGCAGTCCTC
LTR/ERV1	ALTR2C_BT	CTATCTGAGATGCTGCCTCCCGGGCTGCAGTCCTCATTTTGC
LTR/ERV1	ALTR2C_BT	CGGGAGGCAGCATCTCAGATAGCTCTGAGAGACTGCTCCAAA
LTR/ERV1	ALTR2C_BT	CCTTATATATTGACTTTCCCCCACTGCTGCTTTGGAGCAGTC
LTR/ERV1	ALTR2C_BT	CCTCCCAGGCTGCAGTCCTCATTTTGCCCCAAATAAAACTTA
LTR/ERV1	ALTR2C_BT	CCTCATATCTAGAAAAGCACTAAATCCCTTCATGGTGACATC
LTR/ERV1	ALTR2C_BT	CCGGGAGGCAGCATCTCAGATAGCTCTGAGAGACTGCTCCAA
LTR/ERV1	ALTR2C_BT	CCCTGAACTCCCTCAGGGGTTGTTGAAGGTCAACAGCTATAG
LTR/ERV1	ALTR2C_BT	CCCGGGAGGCAGCATCTCAGATAGCTCTGAGAGACTGCTCCA
LTR/ERV1	ALTR2C_BT	CCCCACTGCTGCTTTGGAGCAGTCTCTCAGAGCTATCTGAGA
LTR/ERV1	ALTR2C_BT	CATCTCAGATAGCTCTGAGAGACTGCTCCAAAGCAGCAGTGG
LTR/ERV1	ALTR2C_BT	CAGTCTCTCAGAGCTATCTGAGATGCTGCCTCCCGGGCTGCA
LTR/ERV1	ALTR2C_BT	CAGCATCTCAGATAGCTCTGAGAGACTGCTCCAAAGCAGCAG
LTR/ERV1	ALTR2C_BT	CACTGCTGCTTTGGAGCAGTCTCTCAGAGCTATCTGAGATGC
LTR/ERV1	ALTR2C_BT	CAACAACCCCTGAGGGAGTTCAGGGTGGAGTGAGGCACTCTG
LTR/ERV1	ALTR2C_BT	CAAATTGGCACTTACCAAGAGCATTGCCAATGACTGAACAAC
LTR/ERV1	ALTR2C_BT	ATTGGCACTTACCAAGAGCATTGCCAATGACTGAACAACAAA
LTR/ERV1	ALTR2C_BT	ATGAGGACTGCAGCCCGGGAGGCAGCATCTCAGATAGCTCTG
LTR/ERV1	ALTR2C_BT	ATCTGAGATGCTGCCTCCCGGGCTGCAGTCCTCATTTTGCCC
LTR/ERV1	ALTR2C_BT	ATCTGAGATGCTGCCTCCCAGGCTGCAGTCCTCATTTTGCCC
LTR/ERV1	ALTR2C_BT	ATCTCCATAGAGGCAGATGGCAAATGCCTTTGTTGTTCAGTC
LTR/ERV1	ALTR2C_BT	ATCTCAGATAGCTCTGAGAGACTGCTCCAAAGCAGCAGTGGG
LTR/ERV1	ALTR2C_BT	ATATATTGACTTTCCCCCACTGCTGCTTTGGAGCAGTCTCTC
LTR/ERV1	ALTR2C_BT	AGTTTTATTTGGGGCAAAATGAGGACTGCAGCCTGGGAGGCA
LTR/ERV1	ALTR2C_BT	AGTCTCTCAGAGCTATCTGAGATGCTGCCTCCCGGGCTGCAG
LTR/ERV1	ALTR2C_BT	AGGACTGCAGCCCGGGAGGCAGCATCTCAGATAGCTCTGAGA
LTR/ERV1	ALTR2C_BT	AGCTCTGAGAGACTGCTCCAAAGCAGCAGTGGGGGAAAGTCA
LTR/ERV1	ALTR2C_BT	AGCCCGGGAGGCAGCATCTCAGATAGCTCTGAGAGACTGCTC
LTR/ERV1	ALTR2C_BT	AGCAGTCTCTCAGAGCTATCTGAGATGCTGCCTCCCGGGCTG
LTR/ERV1	ALTR2C_BT	AGAGTGCCTCACTCCACCCTGAACTCCCTCAGGGGTTGTTGA
LTR/ERV1	ALTR2C_BT	AGAGACTGCTCCAAAGCAGCAGTGGGGGAAAGTCAATATATA
LTR/ERV1	ALTR2C_BT	AGACTGCTCCAAAGCAGCAGTGGGGGAAAGTCAATATATAAG
LTR/ERV1	ALTR2C_BT	ACTGCTGCTTTGGAGCAGTCTCTCAGAGCTATCTGAGATGCT
LTR/ERV1	ALTR2C_BT	ACTGCAGCCCGGGAGGCAGCATCTCAGATAGCTCTGAGAGAC
LTR/ERV1	ALTR2C_BT	ACCTTATATATTGACTTTCCCCCACTGCTGCTTTGGAGCAGT
LTR/ERV1	ALTR2C_BT	ACCATGAAGGGATTTAGTGCTTTTCTAGATATGAGGAGATGC
LTR/ERV1	ALTR2C_BT	AAGTTTTATTTGGGGCAAAATGAGGACTGCAGCCTGGGAGGC
LTR/ERV1	ALTR2C_BT	AACCTTATATATTGACTTTCCCCCACTGCTGCTTTGGAGCAG
LTR/ERV1	ALTR2C_BT	AACAACCCCTGAGGGAGTTCAGGGTGGAGTGAGGCACTCTGT
LTR/ERV1	ALTR2C_BT	AAATGCCTTTGTTGTTCAGTCATTGGCAATGCTCTTGGTAAG
LTR/ERV1	ALTR2C_BT	AAACCTTATATATTGACTTTCCCCCACTGCTGCTTTGGAGCA
LTR/ERV1	ALTR2C_BT	AAAATGAGGACTGCAGCCTGGGAGGCAGCATCTCAGATAGCT
LTR/ERV1	ALTR2C_BT	AAAAAAAGATGTACAACTTGAGAGTTGTGAGTTAAGTTTTAT
LTR/ERV1	ALTR2C_BT	TGCTGCCTCCCAGGCTGCAGTCCTCATTTTGCCCCAAATAAA
LTR/ERV1	ALTR2C_BT	TCAGATAGCTCTGAGAGACTGCTCCAAAGCAGCAGTGGGGGA
LTR/ERV1	ALTR2C_BT	TCAGATAGCTCTGAGAGACTGCTCCAAAGAGGCAGTGGGGGA
LTR/ERV1	ALTR2C_BT	TATTGACTTTCCCCCACTGCTGCTTTGGAGCAGTCTCTCAGA
LTR/ERV1	ALTR2C_BT	TACAAATTGGCACTTACCAAGAGCATTGCCAATGACTGAACA
LTR/ERV1	ALTR2C_BT	TAAAAAAAGATGTACAACTTGAGAGTTGTGAGTTAAGTTTTA
LTR/ERV1	ALTR2C_BT	GTTGACCTTCAACAATCCCTGAGGGAGTTCAGGGTGGAGTGA
LTR/ERV1	ALTR2C_BT	GCTCTGAGAGACTGCTCCAAAGCAGCAGTGGGGGAAAGTCAA
LTR/ERV1	ALTR2C_BT	GCATTGCCAATGACTGAACAACAAAGGCATTTGCCATCTGCC
LTR/ERV1	ALTR2C_BT	GCACTTACCAAGAGCATTGCCAATGACTGAACAACAAAGGCA
LTR/ERV1	ALTR2C_BT	GCAAATGCCTTTGTTGTTCAGTCATTGGCAATGCTCTTGGTA
LTR/ERV1	ALTR2C_BT	GATGCTGCCTCCCGGGCTGCAGTCCTCATTTTGCCCCAAATA
LTR/ERV1	ALTR2C_BT	GATCCCAATCCTTGCATCTCTTCATATCTAGAAAAGCACTAA
LTR/ERV1	ALTR2C_BT	GAGCTGATGTCACCATGAAGGGATTTAGTGCTTTTCTAGATA
LTR/ERV1	ALTR2C_BT	GAGATGCTGCCTCCCGGGCTGCAGTCCTCATTTTGCCCCAAA
LTR/ERV1	ALTR2C_BT	GACTTTCCCCCACTGCTGCTTTGGAGCAGTCTCTCAGAGCTA
LTR/ERV1	ALTR2C_BT	GAAGGGATTTAGTGCTTTTCTAGATATGAGGAGATGCAAGGA
LTR/ERV1	ALTR2C_BT	GAACTCCCTCAGGGGTTGTTGAAGGTCAACAGCTATAGCAGC
LTR/ERV1	ALTR2C_BT	CTTTCCCCCACTGCTGCTTTGGAGCAGTCTCTCAGAGCTATC
LTR/ERV1	ALTR2C_BT	CTTTCCCCCACTGCCGCTTTGGAGCAGTCTCTCAGAGCTATC
LTR/ERV1	ALTR2C_BT	CTCCTGGGCTGCTGTCCTCATTTTGCCCCAAATAAAACTTAA
LTR/ERV1	ALTR2C_BT	CCTTGCATCTCCTCATATCTAGAAAAGCACTAAATCCCTTCA
LTR/ERV1	ALTR2C_BT	CCTCCCGGGCTGCAGTCCTCATTTTGCCCCAAATAAAACTTA
LTR/ERV1	ALTR2C_BT	CCCCCACTGCTGCTTTGGAGCAGTCTCTCAGAGCTATCTGAG
LTR/ERV1	ALTR2C_BT	CCCCCACTGCCTCTTTGGAGCAGTCTCTCAGAGCTATCTGAG
LTR/ERV1	ALTR2C_BT	CCATGAAGGGATTTAGTGCTTTTCTAGATATGAGGAGATGCA
LTR/ERV1	ALTR2C_BT	CATGAAGGGATTTAGTGCTTTTCTAGATATGAGGAGATGCAA
LTR/ERV1	ALTR2C_BT	CAGGGGTTGTTGAAGGTCAACAGCTATAGCAGCATGGGGTTC
LTR/ERV1	ALTR2C_BT	CAGATAGCTCTGAGAGACTGCTCCAAAGCAGCAGTGGGGGAA
LTR/ERV1	ALTR2C_BT	CACTCCACCCTGAACTCCCTCAGGGATTGTTGAAGGTCAACA
LTR/ERV1	ALTR2C_BT	CAAATGCCTTTGTTGTTCAGTCATTGGCAATGCTCTTGGTAA
LTR/ERV1	ALTR2C_BT	ATTGACTTTCCCCCACTGCTGCTTTGGAGCAGTCTCTCAGAG
LTR/ERV1	ALTR2C_BT	ATTAAGTTTTATTTGGGGCAAAATGAGGACAGCAGCCCAGGA
LTR/ERV1	ALTR2C_BT	ATGCCTTTGTTGTTCAGTCATTGGCAATGCTCTTGGTAAGTG
LTR/ERV1	ALTR2C_BT	ATGAAGGGATTTAGTGCTTTTCTAGATATGAGGAGATGCAAG
LTR/ERV1	ALTR2C_BT	ATCTAGAAAAGCACTAAATCCCTTCATGGTGACATCAGCTCC
LTR/ERV1	ALTR2C_BT	ATCCTCATGACTAACAAAAACCTTTTGTAAAATGAGTGCTTC
LTR/ERV1	ALTR2C_BT	ATCCCAATCCTTGCATCTCTTCATATCTAGAAAAGCACTAAA
LTR/ERV1	ALTR2C_BT	ATATTGACTTTCCCCCACTGCTGCTTTGGAGCAGTCTCTCAG
LTR/ERV1	ALTR2C_BT	AGGGGTTGTTGAAGGTCAACAGCTATAGCAGCATGGGGTTCA
LTR/ERV1	ALTR2C_BT	AGGAGCTGATGTCACCATGAAGGGATTTAGTGCTTTTCTAGA
LTR/ERV1	ALTR2C_BT	AGGACTGCAGCCTGGGAGACAGCACCTCAGATAGCTCTGAGA
LTR/ERV1	ALTR2C_BT	AGATGCTGCCTCCCGGGCTGCAGTCCTCATTTTGCCCCAAAT
LTR/ERV1	ALTR2C_BT	AGATAGCTCTGAGAGACTGCTCCAAAGCGGCAGTGGGGGAAA
LTR/ERV1	ALTR2C_BT	ACAAATTGGCACTTACCAAGAGCATTGCCAATGACTGAACAA
LTR/ERV1	ALTR2C_BT	AATGCCTTTGTTGTTCAGTCATTGGCAATGCTCTTGGTAAGT
LTR/ERV1	ALTR2C_BT	AAGTTTTATTTGGGGCAAAATGAGGACTGCAGCCCGGGAGGC
LTR/ERV1	ALTR2C_BT	AAGGGATTTAGTGCTTTTCTAGATATGAGGAGATGCAAGGAT
LTR/ERV1	ALTR2C_BT	AACTCCCTCAGGGGTTGTTGAAGGTCAACAGCTATAGCAGCA
LTR/ERV1	ALTR2C_BT	AACCCCATGCTGCTATAGCTGTTGACCTTCAACAACCCCTGA
LTR/ERV1	ALTR2C_BT	AAATTGGCACTTACCAAGAGCATTGCCAATGACTGAACAACA
LTR/ERV1	ALTR2C_BT	AAACTTAACTCACAACTCTCAAGTTGTACATCTTTTTTTAGT
LTR/ERV1	ALTR2C_BT	AAAACTTAACTCACAACTCTCAAGTTGTACATCTTTTTTTAG
LTR/ERV1	ALTR2C_BT	TGGTGACATCAGATCCTCATGACTAACAAAAACCTTTTGTAA
LTR/ERV1	ALTR2C_BT	TGCTGCCTCCCGGGCTGCAGTCCTCATTTTGCCCCAAATAAA
LTR/ERV1	ALTR2C_BT	TGCCAAAATGTTTGCTTGACTGCATGTATCCCTCTTCACTAA
LTR/ERV1	ALTR2C_BT	TGAGATGCTGCCTCCCAGGCTGCAGTCCTCATTTTGCCCCAA
LTR/ERV1	ALTR2C_BT	TGACTTAAGTTTTAGTTGAGACAAAATGAGAATTATAGCCCA
LTR/ERV1	ALTR2C_BT	TGAAGGGGGAGTTCAGTGCAATCAAGCACTTACTTTACAAAA
LTR/ERV1	ALTR2C_BT	TCTCATTTTGTCTCAACTAAAACTTAAGTCACAGCTCTCACA
LTR/ERV1	ALTR2C_BT	TCCTCATGACTAACAAAAACCTTTTGTAAAATGAGTGCTTCA
LTR/ERV1	ALTR2C_BT	TCCCTTGCCTACTTATCAGAGCAGTTCCTCAGAGATATCCGA
LTR/ERV1	ALTR2C_BT	TCATGATCCCAATCCTTGCATCTCTTCATATCTAGAAAAGCA
LTR/ERV1	ALTR2C_BT	TCAGAGCTATCTGAGGTGCTGTCTCCCAGGCTGCAGTCCTCA
LTR/ERV1	ALTR2C_BT	TCAGAGCTATCTGAGATGCTGCCTCCTGGGCTGCAGTCCTCA
LTR/ERV1	ALTR2C_BT	TCAGAGATATCCGAGAGGCTGAACCCTGGGCTATAATTCTCA
LTR/ERV1	ALTR2C_BT	TCAATCTCCATAGAGGCAGATGGCAAATGCCTTTGTTGTTCA
LTR/ERV1	ALTR2C_BT	TATTGACTTTCCCCCACTGCCGCTTTGGAGCAGTCTCTCAGA
LTR/ERV1	ALTR2C_BT	TATCTCTGAGGAACTGCTCTGATAAGTAGGCAAGGGAGGTCA
LTR/ERV1	ALTR2C_BT	TATATTGACTTTCCCCCACTGCCGCTTTGGAGCAGTCTCTCA
LTR/ERV1	ALTR2C_BT	TATATGTGATTTTAGTGAAGAGGGATACATGCAGTCAAGCAA
LTR/ERV1	ALTR2C_BT	TATAGCAGCATGGGGTTCAATCTCCATAGAGGCAGATGGCAA
LTR/ERV1	ALTR2C_BT	TAGTGCTTTTCTAGATATGAAGAGATGCAAGGATTGGGATCA
LTR/ERV1	ALTR2C_BT	TACTTATCAGAGCAGTTCCTCAGAGATATCCGAGAGGCTGAA
LTR/ERV1	ALTR2C_BT	TACATGCAGTCAAGCAAACATTTTGGCAGAGGGTTTCCACTA
LTR/ERV1	ALTR2C_BT	TAAGTTTTATTTGGGGCAAAATGAGGACAGCAGCCCAGGAGA
LTR/ERV1	ALTR2C_BT	TAAGTAGGCAAGGGAGGTCAGTATATATGTGATTTTAGTGAA
LTR/ERV1	ALTR2C_BT	TAAATCCCTTCATGGTGATATCAGATCCTCATGACTAACAAA
LTR/ERV1	ALTR2C_BT	TAAAATCACATATATACTGACCTCCCTTGCCTACTTATCAGA
LTR/ERV1	ALTR2C_BT	GTTTGCTTGACTGCATGTATCCCTCTTCACTAAAATCACATA
LTR/ERV1	ALTR2C_BT	GTGAGAGCTGTGACTTAAGTTTTAGTTGAGACAAAATGAGAA
LTR/ERV1	ALTR2C_BT	GTGACATCAGATCCTCATGACTAACAAAAACCTTTTGTAAAA
LTR/ERV1	ALTR2C_BT	GTGAAGGGGGAGTTCAGTGCAATCAAGCACTTACTTTACAAA
LTR/ERV1	ALTR2C_BT	GGTGACATCAGATCCTCATGACTAACAAAAACCTTTTGTAAA
LTR/ERV1	ALTR2C_BT	GGGTTCAGCCTCTCGGATATCTCTGAGGAACTGCTCTGATAA
LTR/ERV1	ALTR2C_BT	GGGCTATAATTCTCATTTTGTCTCAACTAAAACTTAAGTCAC
LTR/ERV1	ALTR2C_BT	GGCTGAACCCTGGGCTATAATTCTCATTTTGTCTCAACTAAA
LTR/ERV1	ALTR2C_BT	GGCTATAATTCTCATTTTGTCTCAACTAAAACTTAAGTCACA
LTR/ERV1	ALTR2C_BT	GGCAAGGGAGGTCAGTATATATGTGATTTTAGTGAAGAGGGA
LTR/ERV1	ALTR2C_BT	GGATTTAGTGTTTCTCTAGATATGAGGAGATGCAAGGATTGA
LTR/ERV1	ALTR2C_BT	GGATACATGCAGTCAAGCAAACATTTTGGCAGAGGGTTTCCA
LTR/ERV1	ALTR2C_BT	GGAGACAGCACCTCAGATAGCTCTGAGAGACTGCTCCAAAGA
LTR/ERV1	ALTR2C_BT	GGAAACCCTCTGCCAAAATGTTTGCTTGACTGCATGTATCCC
LTR/ERV1	ALTR2C_BT	GCTTTTCTAGATATGAAGAGATGCAAGGATTGGGATCATGAA
LTR/ERV1	ALTR2C_BT	GCTTGACTGCATGTATCCCTCTTCACTAAAATCACATATATA
LTR/ERV1	ALTR2C_BT	GCTGCCTCCCGGGCTGCAGTCCTCATTTTGCCCCAAATAAAA
LTR/ERV1	ALTR2C_BT	GCTGAACCCTGGGCTATAATTCTCATTTTGTCTCAACTAAAA
LTR/ERV1	ALTR2C_BT	GCTCTGAGAGACTGCTCCAAAGCGGCAGTGGGGGAAAGTCAA
LTR/ERV1	ALTR2C_BT	GCCTTTGTTGTTCAGTCATTGGCAATGCTCTTGGTAAGTGCC
LTR/ERV1	ALTR2C_BT	GCCTCTCGGATATCTCTGAGGAACTGCTCTGATAAGTAGGCA
LTR/ERV1	ALTR2C_BT	GCCATCTGCCTCTATGGAGATTGAACCCCATGCTGCTATAGC
LTR/ERV1	ALTR2C_BT	GCCAAAATGTTTGCTTGACTGCATGTATCCCTCTTCACTAAA
LTR/ERV1	ALTR2C_BT	GCAGCATGGGGTTCAATCTCCATAGAGGCAGATGGCAAATGC
LTR/ERV1	ALTR2C_BT	GCACAGTGTGAGAGCTGTGACTTAAGTTTTAGTTGAGACAAA
LTR/ERV1	ALTR2C_BT	GATGCTGCCTCCCAGGCTGCAGTCCTCATTTTGCCCCAAATA
LTR/ERV1	ALTR2C_BT	GATCTGATGTCACCATGAAGGGATTTAGTGCTTTTCTAGATA
LTR/ERV1	ALTR2C_BT	GATACATGCAGTCAAGCAAACATTTTGGCAGAGGGTTTCCAC
LTR/ERV1	ALTR2C_BT	GAGGTCAGTATATATGTGATTTTAGTGAAGAGGGATACATGC
LTR/ERV1	ALTR2C_BT	GAGGCTGAACCCTGGGCTATAATTCTCATTTTGTCTCAACTA
LTR/ERV1	ALTR2C_BT	GAGGAACTGCTCTGATAAGTAGGCAAGGGAGGTCAGTATATA
LTR/ERV1	ALTR2C_BT	GAGATTGAACCCCATGCTGCTATAGCTGTTGACCTTCAACAA
LTR/ERV1	ALTR2C_BT	GAGATGCTGCCTCCCAGGCTGCAGTCCTCATTTTGCCCCAAA
LTR/ERV1	ALTR2C_BT	GAGAGGCTGAACCCTGGGCTATAATTCTCATTTTGTCTCAAC
LTR/ERV1	ALTR2C_BT	GAGACAAAATGAGAATTATAGCCCAGGGTTCAGCCTCTCGGA
LTR/ERV1	ALTR2C_BT	GACTTTCCCCCACTGCCGCTTTGGAGCAGTCTCTCAGAGCTA
LTR/ERV1	ALTR2C_BT	GACTGCATGTATCCCTCTTCACTAAAATCACATATATACTGA
LTR/ERV1	ALTR2C_BT	GACAAAATGAGAATTATAGCCCAGGGTTCAGCCTCTCGGATA
LTR/ERV1	ALTR2C_BT	GAATTATAGCCCAGGGTTCAGCCTCTCGGATATCTCTGAGGA
LTR/ERV1	ALTR2C_BT	GAACAACAAAGGCATTTGCCATCTGCCTCTATGGAGATTGAA
LTR/ERV1	ALTR2C_BT	CTTTTCTAGATATGAAGAGATGCAAGGATTGGGATCATGAAA
LTR/ERV1	ALTR2C_BT	CTTTGTTGTTCAGTCATTGGCAATGCTCTTGGTAAGTGCCAA
LTR/ERV1	ALTR2C_BT	CTTGACTGCATGTATCCCTCTTCACTAAAATCACATATATAC
LTR/ERV1	ALTR2C_BT	CTTATCAGAGCAGTTCCTCAGAGATATCCGAGAGGCTGAACC
LTR/ERV1	ALTR2C_BT	CTTAATTCACATCTCTCAAATTGTGCATCTGTTTTAGCTGAC
LTR/ERV1	ALTR2C_BT	CTGTGACTTAAGTTTTAGTTGAGACAAAATGAGAATTATAGC
LTR/ERV1	ALTR2C_BT	CTGTCTCCTGGGCTGCAGTCCTCATTTTGCCCCAAATAAAAC
LTR/ERV1	ALTR2C_BT	CTGTCTCCCAGGCTGCAGTCCTCATTTTGCCCCAAATAAAAC
LTR/ERV1	ALTR2C_BT	CTGGGCTATAATTCTCATTTTGTCTCAACTAAAACTTAAGTC
LTR/ERV1	ALTR2C_BT	CTGCCTCCCGGGCTGCAGTCCTCATTTTGCCCCAAATAAAAC
LTR/ERV1	ALTR2C_BT	CTGCCAAAATGTTTGCTTGACTGCATGTATCCCTCTTCACTA
LTR/ERV1	ALTR2C_BT	CTGCATGTATCCCTCTTCACTAAAATCACATATATACTGACC
LTR/ERV1	ALTR2C_BT	CTGAGGAACTGCTCTGATAAGTAGGCAAGGGAGGTCAGTATA
LTR/ERV1	ALTR2C_BT	CTGAACCCTGGGCTATAATTCTCATTTTGTCTCAACTAAAAC
LTR/ERV1	ALTR2C_BT	CTCTTTGGAGCAGTCTCTCAGAGCTATCTGAGGTGCTGTCTC
LTR/ERV1	ALTR2C_BT	CTCTTCACTAAAATCACATATATACTGACCTCCCTTGCCTAC
LTR/ERV1	ALTR2C_BT	CTCTGCCAAAATGTTTGCTTGACTGCATGTATCCCTCTTCAC
LTR/ERV1	ALTR2C_BT	CTCTGAGGAACTGCTCTGATAAGTAGGCAAGGGAGGTCAGTA
LTR/ERV1	ALTR2C_BT	CTCTCGGATATCTCTGAGGAACTGCTCTGATAAGTAGGCAAG
LTR/ERV1	ALTR2C_BT	CTCATTTTGTCTCAACTAAAACTTAAGTCACAGCTCTCACAC
LTR/ERV1	ALTR2C_BT	CTCAGAGCTATCTGAGGTGCTGTCTCCCAGGCTGCAGTCCTC
LTR/ERV1	ALTR2C_BT	CTCAGAGCTATCTGAGATGCTGCCTCCTGGGCTGCAGTCCTC
LTR/ERV1	ALTR2C_BT	CTCAGAGATATCCGAGAGGCTGAACCCTGGGCTATAATTCTC
LTR/ERV1	ALTR2C_BT	CTCACTCCACCCTGAACTCCCTCAGGGATTGTTGAAGGTCAA
LTR/ERV1	ALTR2C_BT	CTATAGCAGCATGGGGTTCAATCTCCATAGAGGCAGATGGCA
LTR/ERV1	ALTR2C_BT	CTATAATTCTCATTTTGTCTCAACTAAAACTTAAGTCACAGC
LTR/ERV1	ALTR2C_BT	CTACTTATCAGAGCAGTTCCTCAGAGATATCCGAGAGGCTGA
LTR/ERV1	ALTR2C_BT	CTAAATCCCTTCATGGTGATATCAGATCCTCATGACTAACAA
LTR/ERV1	ALTR2C_BT	CTAAAATCACATATATACTGACCTCCCTTGCCTACTTATCAG
LTR/ERV1	ALTR2C_BT	CGGATATCTCTGAGGAACTGCTCTGATAAGTAGGCAAGGGAG
LTR/ERV1	ALTR2C_BT	CGAGAGGCTGAACCCTGGGCTATAATTCTCATTTTGTCTCAA
LTR/ERV1	ALTR2C_BT	CCTTTGTTGTTCAGTCATTGGCAATGCTCTTGGTAAGTGCCA
LTR/ERV1	ALTR2C_BT	CCTTGCCTACTTATCAGAGCAGTTCCTCAGAGATATCCGAGA
LTR/ERV1	ALTR2C_BT	CCTCTTCACTAAAATCACATATATACTGACCTCCCTTGCCTA
LTR/ERV1	ALTR2C_BT	CCTCTGCCAAAATGTTTGCTTGACTGCATGTATCCCTCTTCA
LTR/ERV1	ALTR2C_BT	CCTCTCGGATATCTCTGAGGAACTGCTCTGATAAGTAGGCAA
LTR/ERV1	ALTR2C_BT	CCTCCCTTGCCTACTTATCAGAGCAGTTCCTCAGAGATATCC
LTR/ERV1	ALTR2C_BT	CCTCACTCCACCCTGAACTCCCTCAGGGATTGTTGAAGGTCA
LTR/ERV1	ALTR2C_BT	CCGAGAGGCTGAACCCTGGGCTATAATTCTCATTTTGTCTCA
LTR/ERV1	ALTR2C_BT	CCCTTGCCTACTTATCAGAGCAGTTCCTCAGAGATATCCGAG
LTR/ERV1	ALTR2C_BT	CCCTGGGCTATAATTCTCATTTTGTCTCAACTAAAACTTAAG
LTR/ERV1	ALTR2C_BT	CCCTCTGCCAAAATGTTTGCTTGACTGCATGTATCCCTCTTC
LTR/ERV1	ALTR2C_BT	CCCCTTCACCAAAACCTTATATATTGACTTTCCCCCACTGCC
LTR/ERV1	ALTR2C_BT	CCCCCTTCACCAAAACCTTATATATTGACCTTCCCCCACTGC
LTR/ERV1	ALTR2C_BT	CCCCATGCTGCTATAGCTGTTGACCTTCAACAACCCCTGAGG
LTR/ERV1	ALTR2C_BT	CCCATGCTGCTATAGCTGTTGACCTTCAACAACCCCTGAGGG
LTR/ERV1	ALTR2C_BT	CCCAATCCTTGCATCTCTTCATATCTAGAAAAGCACTAAATC
LTR/ERV1	ALTR2C_BT	CCATGCTGCTATAGCTGTTGACCTTCAACAACCCCTGAGGGA
LTR/ERV1	ALTR2C_BT	CCAGGGTTCAGCCTCTCGGATATCTCTGAGGAACTGCTCTGA
LTR/ERV1	ALTR2C_BT	CCAATCCTTGCATCTCTTCATATCTAGAAAAGCACTAAATCC
LTR/ERV1	ALTR2C_BT	CCAAGAGCATTGCCAATGACTGAACAACAAAGGCATTTGCCA
LTR/ERV1	ALTR2C_BT	CCAAAATGTTTGCTTGACTGCATGTATCCCTCTTCACTAAAA
LTR/ERV1	ALTR2C_BT	CATTTTACAAAAGGTTTTTGTTAGTCATGAGGATCTGATGTC
LTR/ERV1	ALTR2C_BT	CATGTATCCCTCTTCACTAAAATCACATATATACTGACCTCC
LTR/ERV1	ALTR2C_BT	CATGCTGCTATAGCTGTTGACCTTCAACAACCCCTGAGGGAG
LTR/ERV1	ALTR2C_BT	CATGATCCCAATCCTTGCATCTCTTCATATCTAGAAAAGCAC
LTR/ERV1	ALTR2C_BT	CATATCTAGAAAAGCACTAAATCCCTTCATGGTGACATCAGC
LTR/ERV1	ALTR2C_BT	CATATCTAGAAAAGCACTAAATCCCTTCATGGTGACATCAGA
LTR/ERV1	ALTR2C_BT	CATATATACTGACCTCCCTTGCCTACTTATCAGAGCAGTTCC
LTR/ERV1	ALTR2C_BT	CAGTTCCTCAGAGATATCCGAGAGGCTGAACCCTGGGCTATA
LTR/ERV1	ALTR2C_BT	CAGTGTGAGAGCTGTGACTTAAGTTTTAGTTGAGACAAAATG
LTR/ERV1	ALTR2C_BT	CAGTATATATGTGATTTTAGTGAAGAGGGATACATGCAGTCA
LTR/ERV1	ALTR2C_BT	CAGCTATAGCAGCATGGGGTTCAATCTCCATAGAGGCAGATG
LTR/ERV1	ALTR2C_BT	CAGCCTCTCGGATATCTCTGAGGAACTGCTCTGATAAGTAGG
LTR/ERV1	ALTR2C_BT	CAGCATGGGGTTCAATCTCCATAGAGGCAGATGGCAAATGCC
LTR/ERV1	ALTR2C_BT	CAGATGGCAAATGCCTTTGTTGTTCAGTCATTGGCAATGCTC
LTR/ERV1	ALTR2C_BT	CAGATCCTCATGACTAACAAAAACCTTTTGTAAAATGAGTGC
LTR/ERV1	ALTR2C_BT	CAGATAGCTCTGAGAGACTGCTCCAAAGAGGCAGTGGGGGAA
LTR/ERV1	ALTR2C_BT	CAGAGCAGTTCCTCAGAGATATCCGAGAGGCTGAACCCTGGG
LTR/ERV1	ALTR2C_BT	CACTCATTTTACAAAAGGTTTTTGTTAGTCATGAGGATCTGA
LTR/ERV1	ALTR2C_BT	CACTAAAATCACATATATACTGACCTCCCTTGCCTACTTATC
LTR/ERV1	ALTR2C_BT	CACAGTGTGAGAGCTGTGACTTAAGTTTTAGTTGAGACAAAA
LTR/ERV1	ALTR2C_BT	CAATCTCCATAGAGGCAGATGGCAAATGCCTTTGTTGTTCAG
LTR/ERV1	ALTR2C_BT	CAATCCTTGCATCTCCTCATATCTAGAAAAGCACTAAATCCC
LTR/ERV1	ALTR2C_BT	CAAGGGAGGTCAGTATATATGTGATTTTAGTGAAGAGGGATA
LTR/ERV1	ALTR2C_BT	CAACAAAGGCATTTGCCATCTGCCTCTATGGAGATTGAACCC
LTR/ERV1	ALTR2C_BT	CAAAATGAGGACTGCAGCCCAGGAGGCAGCATCTCAGATAGC
LTR/ERV1	ALTR2C_BT	CAAAATGAGAATTATAGCCCAGGGTTCAGCCTCTCGGATATC
LTR/ERV1	ALTR2C_BT	CAAAAAAGCACAGTGTGAGAGCTGTGACTTAAGTTTTAGTTG
LTR/ERV1	ALTR2C_BT	ATTTTAGTGAAGAGGGATACATGCAGTCAAGCAAACATTTTG
LTR/ERV1	ALTR2C_BT	ATTTTACAAAAGGTTTTTGTTAGTCATGAGGATCTGATGTCA
LTR/ERV1	ALTR2C_BT	ATTTGCCATCTGCCTCTATGGAGATTGAACCCCATGCTGCTA
LTR/ERV1	ALTR2C_BT	ATTTAGTGCTTTTCTAGATATGAAGAGATGCAAGGATTGGGA
LTR/ERV1	ALTR2C_BT	ATTGACTTTCCCCCACTGCCGCTTTGGAGCAGTCTCTCAGAG
LTR/ERV1	ALTR2C_BT	ATTCTCATTTTGTCTCAACTAAAACTTAAGTCACAGCTCTCA
LTR/ERV1	ALTR2C_BT	ATTATAGCCCAGGGTTCAGCCTCTCGGATATCTCTGAGGAAC
LTR/ERV1	ALTR2C_BT	ATGTTTGCTTGACTGCATGTATCCCTCTTCACTAAAATCACA
LTR/ERV1	ALTR2C_BT	ATGTGATTTTAGTGAAGAGGGATACATGCAGTCAAGCAAACA
LTR/ERV1	ALTR2C_BT	ATGTATCCCTCTTCACTAAAATCACATATATACTGACCTCCC
LTR/ERV1	ALTR2C_BT	ATGGGGTTCAATCTCCATAGAGGCAGATGGCAAATGCCTTTG
LTR/ERV1	ALTR2C_BT	ATGGCAAATGCCTTTGTTGTTCAGTCATTGGCAATGCTCTTG
LTR/ERV1	ALTR2C_BT	ATGCTGCCTCCCGGGCTGCAGTCCTCATTTTGCCCCAAATAA
LTR/ERV1	ALTR2C_BT	ATGCTGCCTCCCAGGCTGCAGTCCTCATTTTGCCCCAAATAA
LTR/ERV1	ALTR2C_BT	ATGAGGACTGCAGCCCAGGAGGCAGCATCTCAGATAGCTCTG
LTR/ERV1	ALTR2C_BT	ATGAGAATTATAGCCCAGGGTTCAGCCTCTCGGATATCTCTG
LTR/ERV1	ALTR2C_BT	ATCTCTGAGGAACTGCTCTGATAAGTAGGCAAGGGAGGTCAG
LTR/ERV1	ALTR2C_BT	ATCTAGAAAAGCACTAAATCCCTTCATGGTGACATCAGATCC
LTR/ERV1	ALTR2C_BT	ATCCCTCTTCACTAAAATCACATATATACTGACCTCCCTTGC
LTR/ERV1	ALTR2C_BT	ATCAGAGCAGTTCCTCAGAGATATCCGAGAGGCTGAACCCTG
LTR/ERV1	ALTR2C_BT	ATCACATATATACTGACCTCCCTTGCCTACTTATCAGAGCAG
LTR/ERV1	ALTR2C_BT	ATATTGACTTTCCCCCACTGCCGCTTTGGAGCAGTCTCTCAG
LTR/ERV1	ALTR2C_BT	ATATGTGATTTTAGTGAAGAGGGATACATGCAGTCAAGCAAA
LTR/ERV1	ALTR2C_BT	ATATCTCTGAGGAACTGCTCTGATAAGTAGGCAAGGGAGGTC
LTR/ERV1	ALTR2C_BT	ATATCTAGAAAAGCACTAAATCCCTTCATGGTGACATCAGAT
LTR/ERV1	ALTR2C_BT	ATATATTGACTTTCCCCCACTGCCGCTTTGGAGCAGTCTCTC
LTR/ERV1	ALTR2C_BT	ATATATGTGATTTTAGTGAAGAGGGATACATGCAGTCAAGCA
LTR/ERV1	ALTR2C_BT	ATATACTGACCTCCCTTGCCTACTTATCAGAGCAGTTCCTCA
LTR/ERV1	ALTR2C_BT	ATAGCCCAGGGTTCAGCCTCTCGGATATCTCTGAGGAACTGC
LTR/ERV1	ALTR2C_BT	ATAGCAGCATGGGGTTCAATCTCCATAGAGGCAGATGGCAAA
LTR/ERV1	ALTR2C_BT	ATACTGACCTCCCTTGCCTACTTATCAGAGCAGTTCCTCAGA
LTR/ERV1	ALTR2C_BT	ATAATTCTCATTTTGTCTCAACTAAAACTTAAGTCACAGCTC
LTR/ERV1	ALTR2C_BT	ATAAGTAGGCAAGGGAGGTCAGTATATATGTGATTTTAGTGA
LTR/ERV1	ALTR2C_BT	AGTTTTATTTGGGGCAAAATGAGGACTGCAGCCCGGGAGGCA
LTR/ERV1	ALTR2C_BT	AGTTTTATTTGGGGCAAAATGAGGACTGCAGCCCAGGAGACA
LTR/ERV1	ALTR2C_BT	AGTTTTAGTTGAGACAAAATGAGAATTATAGCCCAGGGTTCA
LTR/ERV1	ALTR2C_BT	AGTTCCTCAGAGATATCCGAGAGGCTGAACCCTGGGCTATAA
LTR/ERV1	ALTR2C_BT	AGTGTGAGAGCTGTGACTTAAGTTTTAGTTGAGACAAAATGA
LTR/ERV1	ALTR2C_BT	AGTGGAAACCCTCTGCCAAAATGTTTGCTTGACTGCATGTAT
LTR/ERV1	ALTR2C_BT	AGTGCTTTTCTAGATATGAAGAGATGCAAGGATTGGGATCAT
LTR/ERV1	ALTR2C_BT	AGTGAAGAGGGATACATGCAGTCAAGCAAACATTTTGGCAGA
LTR/ERV1	ALTR2C_BT	AGTATATATGTGATTTTAGTGAAGAGGGATACATGCAGTCAA
LTR/ERV1	ALTR2C_BT	AGTAGGCAAGGGAGGTCAGTATATATGTGATTTTAGTGAAGA
LTR/ERV1	ALTR2C_BT	AGGTCAGTATATATGTGATTTTAGTGAAGAGGGATACATGCA
LTR/ERV1	ALTR2C_BT	AGGGTTCAGCCTCTCGGATATCTCTGAGGAACTGCTCTGATA
LTR/ERV1	ALTR2C_BT	AGGGATACATGCAGTCAAGCAAACATTTTGGCAGAGGGTTTC
LTR/ERV1	ALTR2C_BT	AGGGAGGTCAGTATATATGTGATTTTAGTGAAGAGGGATACA
LTR/ERV1	ALTR2C_BT	AGGCTGAACCCTGGGCTATAATTCTCATTTTGTCTCAACTAA
LTR/ERV1	ALTR2C_BT	AGGCAAGGGAGGTCAGTATATATGTGATTTTAGTGAAGAGGG
LTR/ERV1	ALTR2C_BT	AGGATCTGATGTCACCATGAAGGGATTTAGTGCTTTTCTAGA
LTR/ERV1	ALTR2C_BT	AGGAACTGCTCTGATAAGTAGGCAAGGGAGGTCAGTATATAT
LTR/ERV1	ALTR2C_BT	AGCTGTGACTTAAGTTTTAGTTGAGACAAAATGAGAATTATA
LTR/ERV1	ALTR2C_BT	AGCTGATGTCACCATGAAGGGATTTAGTGCTTTTCTAGATAT
LTR/ERV1	ALTR2C_BT	AGCTCTGAGAGACTGCTCCAAAGCGGCAGTGGGGGAAAGTCA
LTR/ERV1	ALTR2C_BT	AGCTATAGCAGCATGGGGTTCAATCTCCATAGAGGCAGATGG
LTR/ERV1	ALTR2C_BT	AGCCTCTCGGATATCTCTGAGGAACTGCTCTGATAAGTAGGC
LTR/ERV1	ALTR2C_BT	AGCCCAGGGTTCAGCCTCTCGGATATCTCTGAGGAACTGCTC
LTR/ERV1	ALTR2C_BT	AGCATTGCCAATGACTGAACAACAAAGGCATTTGCCATCTGC
LTR/ERV1	ALTR2C_BT	AGCATGGGGTTCAATCTCCATAGAGGCAGATGGCAAATGCCT
LTR/ERV1	ALTR2C_BT	AGCAGTTCCTCAGAGATATCCGAGAGGCTGAACCCTGGGCTA
LTR/ERV1	ALTR2C_BT	AGCAGCATGGGGTTCAATCTCCATAGAGGCAGATGGCAAATG
LTR/ERV1	ALTR2C_BT	AGCACAGTGTGAGAGCTGTGACTTAAGTTTTAGTTGAGACAA
LTR/ERV1	ALTR2C_BT	AGATGCTGCCTCCCAGGCTGCAGTCCTCATTTTGCCCCAAAT
LTR/ERV1	ALTR2C_BT	AGATCCTCATGACTAACAAAAACCTTTTGTAAAATGAGTGCT
LTR/ERV1	ALTR2C_BT	AGATAGCTCTGAGAGACTGCTCCAAAGCAGCAGTGGGGGAAA
LTR/ERV1	ALTR2C_BT	AGAGGCTGAACCCTGGGCTATAATTCTCATTTTGTCTCAACT
LTR/ERV1	ALTR2C_BT	AGAGCTGTGACTTAAGTTTTAGTTGAGACAAAATGAGAATTA
LTR/ERV1	ALTR2C_BT	AGAGCATTGCCAATGACTGAACAACAAAGGCATTTGCCATCT
LTR/ERV1	ALTR2C_BT	AGAGCAGTTCCTCAGAGATATCCGAGAGGCTGAACCCTGGGC
LTR/ERV1	ALTR2C_BT	AGAGACTGCTCCAAAGCGGCAGTGGGGGAAAGTCAATATATA
LTR/ERV1	ALTR2C_BT	AGACAGCACCTCAGATAGCTCTGAGAGACTGCTCCAAAGAGG
LTR/ERV1	ALTR2C_BT	AGACAAAATGAGAATTATAGCCCAGGGTTCAGCCTCTCGGAT
LTR/ERV1	ALTR2C_BT	AGAATTATAGCCCAGGGTTCAGCCTCTCGGATATCTCTGAGG
LTR/ERV1	ALTR2C_BT	ACTTTCCCCCACTGCTGCTTTGGAGCAGTCTCTCAGAGCTAT
LTR/ERV1	ALTR2C_BT	ACTTTCCCCCACTGCCGCTTTGGAGCAGTCTCTCAGAGCTAT
LTR/ERV1	ALTR2C_BT	ACTTATCAGAGCAGTTCCTCAGAGATATCCGAGAGGCTGAAC
LTR/ERV1	ALTR2C_BT	ACTTAATTCACATCTCTCAAATTGTGCATCTGTTTTAGCTGA
LTR/ERV1	ALTR2C_BT	ACTTAAGTTTTAGTTGAGACAAAATGAGAATTATAGCCCAGG
LTR/ERV1	ALTR2C_BT	ACTGCTCTGATAAGTAGGCAAGGGAGGTCAGTATATATGTGA
LTR/ERV1	ALTR2C_BT	ACTGCATGTATCCCTCTTCACTAAAATCACATATATACTGAC
LTR/ERV1	ALTR2C_BT	ACTGACCTCCCTTGCCTACTTATCAGAGCAGTTCCTCAGAGA
LTR/ERV1	ALTR2C_BT	ACTCCCTCAGGGGTTGTTGAAGGTCAACAGCTATAGCAGCAT
LTR/ERV1	ALTR2C_BT	ACTCCACCCTGAACTCCCTCAGGGATTGTTGAAGGTCAACAG
LTR/ERV1	ALTR2C_BT	ACTCATTTTACAAAAGGTTTTTGTTAGTCATGAGGATCTGAT
LTR/ERV1	ALTR2C_BT	ACTAGTGGAAACCCTCTGCCAAAATGTTTGCTTGACTGCATG
LTR/ERV1	ALTR2C_BT	ACTAAATCCCTTCATGGTGATATCAGATCCTCATGACTAACA
LTR/ERV1	ALTR2C_BT	ACTAAAATCACATATATACTGACCTCCCTTGCCTACTTATCA
LTR/ERV1	ALTR2C_BT	ACCTCCCTTGCCTACTTATCAGAGCAGTTCCTCAGAGATATC
LTR/ERV1	ALTR2C_BT	ACCCTGGGCTATAATTCTCATTTTGTCTCAACTAAAACTTAA
LTR/ERV1	ALTR2C_BT	ACCCCATGCTGCTATAGCTGTTGACCTTCAACAACCCCTGAG
LTR/ERV1	ALTR2C_BT	ACCAAGAGCATTGCCAATGACTGAACAACAAAGGCATTTGCC
LTR/ERV1	ALTR2C_BT	ACATGCAGTCAAGCAAACATTTTGGCAGAGGGTTTCCACTAG
LTR/ERV1	ALTR2C_BT	ACATCAGATCCTCATGACTAACAAAAACCTTTTGTAAAATGA
LTR/ERV1	ALTR2C_BT	ACATATATACTGACCTCCCTTGCCTACTTATCAGAGCAGTTC
LTR/ERV1	ALTR2C_BT	ACAGTGTGAGAGCTGTGACTTAAGTTTTAGTTGAGACAAAAT
LTR/ERV1	ALTR2C_BT	ACAACAAAGGCATTTGCCATCTGCCTCTATGGAGATTGAACC
LTR/ERV1	ALTR2C_BT	ACAAAGGCATTTGCCATCTGCCTCTATGGAGATTGAACCCCA
LTR/ERV1	ALTR2C_BT	ACAAAATGAGAATTATAGCCCAGGGTTCAGCCTCTCGGATAT
LTR/ERV1	ALTR2C_BT	AATTCTCATTTTGTCTCAACTAAAACTTAAGTCACAGCTCTC
LTR/ERV1	ALTR2C_BT	AATTATAGCCCAGGGTTCAGCCTCTCGGATATCTCTGAGGAA
LTR/ERV1	ALTR2C_BT	AATGTTTGCTTGACTGCATGTATCCCTCTTCACTAAAATCAC
LTR/ERV1	ALTR2C_BT	AATGAGGACTGCAGCCCAGGAGGCAGCATCTCAGATAGCTCT
LTR/ERV1	ALTR2C_BT	AATGAGAATTATAGCCCAGGGTTCAGCCTCTCGGATATCTCT
LTR/ERV1	ALTR2C_BT	AATGACTGAACAACAAAGGCATTTGCCATCTGCCTCTATGGA
LTR/ERV1	ALTR2C_BT	AATCTCCATAGAGGCAGATGGCAAATGCCTTTGTTGTTCAGT
LTR/ERV1	ALTR2C_BT	AATCCTTGCATCTCCTCATATCTAGAAAAGCACTAAATCCCT
LTR/ERV1	ALTR2C_BT	AATCCCTTCATGGTGATATCAGATCCTCATGACTAACAAAAA
LTR/ERV1	ALTR2C_BT	AATCACATATATACTGACCTCCCTTGCCTACTTATCAGAGCA
LTR/ERV1	ALTR2C_BT	AAGTTTTAGTTGAGACAAAATGAGAATTATAGCCCAGGGTTC
LTR/ERV1	ALTR2C_BT	AAGTAGGCAAGGGAGGTCAGTATATATGTGATTTTAGTGAAG
LTR/ERV1	ALTR2C_BT	AAGGGAGGTCAGTATATATGTGATTTTAGTGAAGAGGGATAC
LTR/ERV1	ALTR2C_BT	AAGGCATTTGCCATCTGCCTCTATGGAGATTGAACCCCATGC
LTR/ERV1	ALTR2C_BT	AAGCACTCATTTTACAAAAGGTTTTTGTTAGTCATGAGGATC
LTR/ERV1	ALTR2C_BT	AAGCACAGTGTGAGAGCTGTGACTTAAGTTTTAGTTGAGACA
LTR/ERV1	ALTR2C_BT	AAGAGGGATACATGCAGTCAAGCAAACATTTTGGCAGAGGGT
LTR/ERV1	ALTR2C_BT	AAGAGCATTGCCAATGACTGAACAACAAAGGCATTTGCCATC
LTR/ERV1	ALTR2C_BT	AACTTAATTCACATCTCTCAAATTGTGCATCTGTTTTAGCTG
LTR/ERV1	ALTR2C_BT	AACTGCTCTGATAAGTAGGCAAGGGAGGTCAGTATATATGTG
LTR/ERV1	ALTR2C_BT	AACTAAAACTTAAGTCACAGCTCTCACACTGTGCTTTTTTGT
LTR/ERV1	ALTR2C_BT	AACCCTGGGCTATAATTCTCATTTTGTCTCAACTAAAACTTA
LTR/ERV1	ALTR2C_BT	AACCCTCTGCCAAAATGTTTGCTTGACTGCATGTATCCCTCT
LTR/ERV1	ALTR2C_BT	AACAACAAAGGCATTTGCCATCTGCCTCTATGGAGATTGAAC
LTR/ERV1	ALTR2C_BT	AACAAAGGCATTTGCCATCTGCCTCTATGGAGATTGAACCCC
LTR/ERV1	ALTR2C_BT	AAATGTTTGCTTGACTGCATGTATCCCTCTTCACTAAAATCA
LTR/ERV1	ALTR2C_BT	AAATGAGGACTGCAGCCCAGGAGGCAGCATCTCAGATAGCTC
LTR/ERV1	ALTR2C_BT	AAATGAGAATTATAGCCCAGGGTTCAGCCTCTCGGATATCTC
LTR/ERV1	ALTR2C_BT	AAATCCCTTCATGGTGATATCAGATCCTCATGACTAACAAAA
LTR/ERV1	ALTR2C_BT	AAATCACATATATACTGACCTCCCTTGCCTACTTATCAGAGC
LTR/ERV1	ALTR2C_BT	AAAGGCATTTGCCATCTGCCTCTATGGAGATTGAACCCCATG
LTR/ERV1	ALTR2C_BT	AAAGCACAGTGTGAGAGCTGTGACTTAAGTTTTAGTTGAGAC
LTR/ERV1	ALTR2C_BT	AAACCCTCTGCCAAAATGTTTGCTTGACTGCATGTATCCCTC
LTR/ERV1	ALTR2C_BT	AAAATGTTTGCTTGACTGCATGTATCCCTCTTCACTAAAATC
LTR/ERV1	ALTR2C_BT	AAAATGAGGACTGCAGCCCAGGAGGCAGCATCTCAGATAGCT
LTR/ERV1	ALTR2C_BT	AAAATGAGAATTATAGCCCAGGGTTCAGCCTCTCGGATATCT
LTR/ERV1	ALTR2C_BT	AAAATCACATATATACTGACCTCCCTTGCCTACTTATCAGAG
LTR/ERV1	ALTR2C_BT	AAAAGCACAGTGTGAGAGCTGTGACTTAAGTTTTAGTTGAGA
LTR/ERV1	ALTR2C_BT	AAAAAGCACAGTGTGAGAGCTGTGACTTAAGTTTTAGTTGAG
LTR/ERV1	ALTR2C_BT	AAAAAAGCACAGTGTGAGAGCTGTGACTTAAGTTTTAGTTGA
LTR/ERV1	ALTR2C_BT	TGCTGTCTCCTGGGCTGCTGTCCTCATTTTGCCCCAAATAAA
LTR/ERV1	ALTR2C_BT	TGCTGTCTCCCAGGCTGCAGTCCTCATTTTGCCCCAAATAAA
LTR/ERV1	ALTR2C_BT	TGCACAATTTGAGAGATGTGAATTAAGTTTTATTTGGGGCAA
LTR/ERV1	ALTR2C_BT	TGATGTCACCATGAAGGGATTTAGTGCTTTTCTAGATATGAA
LTR/ERV1	ALTR2C_BT	TGAGATGCTGCCTCCTGGGCTGCAGTCCTCATTTTGCCCCAA
LTR/ERV1	ALTR2C_BT	TGAATTAAGTTTTATTTGGGGCAAAATGAGGACAGCAGCCCA
LTR/ERV1	ALTR2C_BT	TCTCCATAGAGGCAGATGGCAAATGCCTTTGTTGTTCAGTCA
LTR/ERV1	ALTR2C_BT	TCAACAGCTATAGCAGCATGGGGTTCAATCTCCATAGAGGCA
LTR/ERV1	ALTR2C_BT	TAAGTTTTATTTGGGGCAAAATGAGGACTGCAGCCTGGGAGA
LTR/ERV1	ALTR2C_BT	TAAGTTTTATTTGGGGCAAAATGAGGACTGCAGCCCAGGAGA
LTR/ERV1	ALTR2C_BT	GTCACCATGAAGGGATTTAGTGCTTTTCTAGATATGAAGAGA
LTR/ERV1	ALTR2C_BT	GGTCAATATATAAGGTTTTGGTGAAGGGGGAGTTCAATACCA
LTR/ERV1	ALTR2C_BT	GGGGTTGTTGAAGGTCAACAGCTATAGCAGCATGGGGTTCAA
LTR/ERV1	ALTR2C_BT	GGGGCAAAATGAGGACTGCAGCCCAGGAGGCAGCATCTCAGA
LTR/ERV1	ALTR2C_BT	GGGCTGCTGTCCTCATTTTGCCCCAAATAAAACTTAATTCAC
LTR/ERV1	ALTR2C_BT	GGCTGCAGTCCTCATTTTGCCCCAAATAAAACTTAACTCGCA
LTR/ERV1	ALTR2C_BT	GGCAAAATGAGGACTGCAGCCTGGGAGACAGCACCTCAGATA
LTR/ERV1	ALTR2C_BT	GGCAAAATGAGGACTGCAGCCCAGGAGGCAGCATCTCAGATA
LTR/ERV1	ALTR2C_BT	GGAGGCAGCATCTCAGATAGCTCTGAGAGACTGCTCCAAAGA
LTR/ERV1	ALTR2C_BT	GGAGATTGAACCCCATGCTGCTATAGCTGTTGACCTTCAACA
LTR/ERV1	ALTR2C_BT	GCTGTCTCCTGGGCTGCTGTCCTCATTTTGCCCCAAATAAAA
LTR/ERV1	ALTR2C_BT	GCTGTCTCCCAGGCTGCAGTCCTCATTTTGCCCCAAATAAAA
LTR/ERV1	ALTR2C_BT	GCCTCTATGGAGATTGAACCCCATGCTGCTATAGCTGTTGAC
LTR/ERV1	ALTR2C_BT	GCCCAGGAGGCAGCATCTCAGATAGCTCTGAGAGACTGCTCC
LTR/ERV1	ALTR2C_BT	GCAGCCCAGGAGGCAGCATCTCAGATAGCTCTGAGAGACTGC
LTR/ERV1	ALTR2C_BT	GCACAATTTGAGAGATGTGAATTAAGTTTTATTTGGGGCAAA
LTR/ERV1	ALTR2C_BT	GATTTCATGATCCCAATCCTTGCATCTCTTCATATCTAGAAA
LTR/ERV1	ALTR2C_BT	GATTGAACCCCATGCTGCTATAGCTGTTGACCTTCAACAACC
LTR/ERV1	ALTR2C_BT	GATGCTGCCTCCTGGGCTGCAGTCCTCATTTTGCCCCAAATA
LTR/ERV1	ALTR2C_BT	GATGCACAATTTGAGAGATGTGAATTAAGTTTTATTTGGGGC
LTR/ERV1	ALTR2C_BT	GAGTGCCTCACTCCACCCTGAACTCCCTCAGGGATTGTTGAA
LTR/ERV1	ALTR2C_BT	GAGATGCTGCCTCCTGGGCTGCAGTCCTCATTTTGCCCCAAA
LTR/ERV1	ALTR2C_BT	GACTGCAGCCCAGGAGGCAGCATCTCAGATAGCTCTGAGAGA
LTR/ERV1	ALTR2C_BT	GACCTTCAACAATCCCTGAGGGAGTTCAGGGTGGAGTGAGGC
LTR/ERV1	ALTR2C_BT	GAAGGGATTTAGTGTTTCTCTAGATATGAGGAGATGCAAGGA
LTR/ERV1	ALTR2C_BT	GAAGGGATTTAGTGCTTTTCTAGATATGAAGAGATGCAAGGA
LTR/ERV1	ALTR2C_BT	CTTTTGTAAAGTAAGTGCTTGATTGCACTGAACTCCCCCTTC
LTR/ERV1	ALTR2C_BT	CTTCATATCTAGAAAAGCACTAAATCCCTTCATGGTGACATC
LTR/ERV1	ALTR2C_BT	CTGTCTCCTGGGCTGCTGTCCTCATTTTGCCCCAAATAAAAC
LTR/ERV1	ALTR2C_BT	CTGGGCTGCTGTCCTCATTTTGCCCCAAATAAAACTTAATTC
LTR/ERV1	ALTR2C_BT	CTGAGATGCTGCCTCCTGGGCTGCAGTCCTCATTTTGCCCCA
LTR/ERV1	ALTR2C_BT	CTCTTCATATCTAGAAAAGCACTAAATCCCTTCATGGTGACA
LTR/ERV1	ALTR2C_BT	CTCTCAGAGCTATCTGAGATGCTGCCTCCTGGGCTGCAGTCC
LTR/ERV1	ALTR2C_BT	CTATGGAGATTGAACCCCATGCTGCTATAGCTGTTGACCTTC
LTR/ERV1	ALTR2C_BT	CTATCTGAGATGCTGCCTCCTGGGCTGCAGTCCTCATTTTGC
LTR/ERV1	ALTR2C_BT	CTAGAAAAGCACTAAATCCCTTCATGGTGACATCAGATCCTC
LTR/ERV1	ALTR2C_BT	CTACAAATTGGCACTTACCAAGAGCATTGCCAATGACTGAAC
LTR/ERV1	ALTR2C_BT	CTAAAACAGATGCACAATTTGAGAGATGTGAATTAAGTTTTA
LTR/ERV1	ALTR2C_BT	CGATTTCATGATCCCAATCCTTGCATCTCTTCATATCTAGAA
LTR/ERV1	ALTR2C_BT	CCTTGCATCTCTTCATATCTAGAAAAGCACTAAATCCCTTCA
LTR/ERV1	ALTR2C_BT	CCTTGCATCTCCTCATATCTAGAGAAACACTAAATCCCTTCA
LTR/ERV1	ALTR2C_BT	CCTTCAACAATCCCTGAGGGAGTTCAGGGTGGAGTGAGGCAC
LTR/ERV1	ALTR2C_BT	CCTCTATGGAGATTGAACCCCATGCTGCTATAGCTGTTGACC
LTR/ERV1	ALTR2C_BT	CCGATTTCATGATCCCAATCCTTGCATCTCTTCATATCTAGA
LTR/ERV1	ALTR2C_BT	CCCCACTGCCTCTTTGGAGCAGTCTCTCAGAGCTATCTGAGA
LTR/ERV1	ALTR2C_BT	CCCAGGAGGCAGCATCTCAGATAGCTCTGAGAGACTGCTCCA
LTR/ERV1	ALTR2C_BT	CCCAATCCTTGCATCTCCTCATATCTAGAAAAGCACTAAATC
LTR/ERV1	ALTR2C_BT	CCATGAAGGGATTTAGTGTTTCTCTAGATATGAGGAGATGCA
LTR/ERV1	ALTR2C_BT	CCAGGAGGCAGCATCTCAGATAGCTCTGAGAGACTGCTCCAA
LTR/ERV1	ALTR2C_BT	CCAAAACCTTATATATTGACTTTCCCCCACTGCTGCTTTGGA
LTR/ERV1	ALTR2C_BT	CATGAAGGGATTTAGTGTTTCTCTAGATATGAGGAGATGCAA
LTR/ERV1	ALTR2C_BT	CATGAAGGGATTTAGTGCTTTTCTAGATATGAAGAGATGCAA
LTR/ERV1	ALTR2C_BT	CATCTCAGATAGCTCTGAGAGACTGCTCCAAAGAGGCAGTGG
LTR/ERV1	ALTR2C_BT	CATCAGATCCTCATGACTAACAAAAACCTTTTGTAAAATGAG
LTR/ERV1	ALTR2C_BT	CATAGAGGCAGATGGCAAATGCCTTTGTTGTTCAGTCATTGG
LTR/ERV1	ALTR2C_BT	CAGTCTCTCAGAGCTATCTGAGATGCTGCCTCCTGGGCTGCA
LTR/ERV1	ALTR2C_BT	CAGGAGGCAGCATCTCAGATAGCTCTGAGAGACTGCTCCAAA
LTR/ERV1	ALTR2C_BT	CAGCATCTCAGATAGCTCTGAGAGACTGCTCCAAAGAGGCAG
LTR/ERV1	ALTR2C_BT	CAGATGCACAATTTGAGAGATGTGAATTAAGTTTTATTTGGG
LTR/ERV1	ALTR2C_BT	CACTGCCTCTTTGGAGCAGTCTCTCAGAGCTATCTGAGATGC
LTR/ERV1	ALTR2C_BT	CACTAAATCCCTTCATGGTGATATCAGATCCTCATGACTAAC
LTR/ERV1	ALTR2C_BT	CACCATGAAGGGATTTAGTGTTTCTCTAGATATGAGGAGATG
LTR/ERV1	ALTR2C_BT	CACCATGAAGGGATTTAGTGCTTTTCTAGATATGAAGAGATG
LTR/ERV1	ALTR2C_BT	CACAATTTGAGAGATGTGAATTAAGTTTTATTTGGGGCAAAA
LTR/ERV1	ALTR2C_BT	CAATGACTGAACAACAAAGGCATTTGCCATCTGCCTCTATGG
LTR/ERV1	ALTR2C_BT	CAATCCTTGCATCTCTTCATATCTAGAAAAGCACTAAATCCC
LTR/ERV1	ALTR2C_BT	CAATCCTTGCATCTCCTCATATCTAGAGAAACACTAAATCCC
LTR/ERV1	ALTR2C_BT	CAACAGCTATAGCAGCATGGGGTTCAATCTCCATAGAGGCAG
LTR/ERV1	ALTR2C_BT	CAACAATCCCTGAGGGAGTTCAGGGTGGAGTGAGGCACTCTG
LTR/ERV1	ALTR2C_BT	CAAAGCAGCAGTGGGGGAAAGTCAATATATAAGGTTTTGGTG
LTR/ERV1	ALTR2C_BT	CAAAACCTTATATATTGACTTTCCCCCACTGCTGCTTTGGAG
LTR/ERV1	ALTR2C_BT	CAAAACCTTATATATTGACTTTCCCCCACTGCCACTTTGGAG
LTR/ERV1	ALTR2C_BT	ATTTCATGATCCCAATCCTTGCATCTCTTCATATCTAGAAAA
LTR/ERV1	ALTR2C_BT	ATTGAACCCCATGCTGCTATAGCTGTTGACCTTCAACAACCC
LTR/ERV1	ALTR2C_BT	ATGTCACCATGAAGGGATTTAGTGCTTTTCTAGATATGAAGA
LTR/ERV1	ALTR2C_BT	ATGCTGCCTCCTGGGCTGCAGTCCTCATTTTGCCCCAAATAA
LTR/ERV1	ALTR2C_BT	ATGCACAATTTGAGAGATGTGAATTAAGTTTTATTTGGGGCA
LTR/ERV1	ALTR2C_BT	ATGACTGAACAACAAAGGCATTTGCCATCTGCCTCTATGGAG
LTR/ERV1	ALTR2C_BT	ATGAAGGGATTTAGTGTTTCTCTAGATATGAGGAGATGCAAG
LTR/ERV1	ALTR2C_BT	ATCTGAGGTGCTGTCTCCCAGGCTGCAGTCCTCATTTTGCCC
LTR/ERV1	ALTR2C_BT	ATCTGAGATGCTGCCTCCTGGGCTGCAGTCCTCATTTTGCCC
LTR/ERV1	ALTR2C_BT	ATCTCTTCATATCTAGAAAAGCACTAAATCCCTTCATGGTGA
LTR/ERV1	ALTR2C_BT	ATCTCAGATAGCTCTGAGAGACTGCTCCAAAGAGGCAGTGGG
LTR/ERV1	ALTR2C_BT	ATAGAGGCAGATGGCAAATGCCTTTGTTGTTCAGTCATTGGC
LTR/ERV1	ALTR2C_BT	ATAAAACTTAATTCACATCTCTCAAATTGTGCATCTGTTTTA
LTR/ERV1	ALTR2C_BT	AGTTTTATTTGGGGCAAAATGAGGACTGCAGCCTGGGAGACA
LTR/ERV1	ALTR2C_BT	AGTTTTATTTGGGGCAAAATGAGGACAGCAGCCCAGGAGACA
LTR/ERV1	ALTR2C_BT	AGTGCCTCACTCCACCCTGAACTCCCTCAGGGATTGTTGAAG
LTR/ERV1	ALTR2C_BT	AGTCTCTCAGAGCTATCTGAGATGCTGCCTCCTGGGCTGCAG
LTR/ERV1	ALTR2C_BT	AGGTCAATATATAAGGTTTTGGTGAAGGGGGAGTTCAATACC
LTR/ERV1	ALTR2C_BT	AGGTCAACAGCTATAGCAGCATGGGGTTCAATCTCCATAGAG
LTR/ERV1	ALTR2C_BT	AGGACTGCAGCCCAGGAGGCAGCATCTCAGATAGCTCTGAGA
LTR/ERV1	ALTR2C_BT	AGCCCAGGAGGCAGCATCTCAGATAGCTCTGAGAGACTGCTC
LTR/ERV1	ALTR2C_BT	AGCAGTCTCTCAGAGCTATCTGAGATGCTGCCTCCTGGGCTG
LTR/ERV1	ALTR2C_BT	AGCACTCTGTGCTCCAGGGAATCTGGTGGGACAGGTCTTTAG
LTR/ERV1	ALTR2C_BT	AGCACTAAATCCCTTCATGGTGACATCAGCTCCTTGTGACTA
LTR/ERV1	ALTR2C_BT	AGATTGAACCCCATGCTGCTATAGCTGTTGACCTTCAACAAC
LTR/ERV1	ALTR2C_BT	AGATGCTGCCTCCTGGGCTGCAGTCCTCATTTTGCCCCAAAT
LTR/ERV1	ALTR2C_BT	AGATGCACAATTTGAGAGATGTGAATTAAGTTTTATTTGGGG
LTR/ERV1	ALTR2C_BT	AGAGTGCCTCACTCCACCCTGAACTCCCTCAGGGATTGTTGA
LTR/ERV1	ALTR2C_BT	ACTGCCTCTTTGGAGCAGTCTCTCAGAGCTATCTGAGATGCT
LTR/ERV1	ALTR2C_BT	ACTGCAGCCCAGGAGGCAGCATCTCAGATAGCTCTGAGAGAC
LTR/ERV1	ALTR2C_BT	ACTACAAATTGGCACTTACCAAGAGCATTGCCAATGACTGAA
LTR/ERV1	ALTR2C_BT	ACCTTCAACAATCCCTGAGGGAGTTCAGGGTGGAGTGAGGCA
LTR/ERV1	ALTR2C_BT	ACCATGAAGGGATTTAGTGTTTCTCTAGATATGAGGAGATGC
LTR/ERV1	ALTR2C_BT	ACCAAAACCTTATATATTGACTTTCCCCCACTGCTGCTTTGG
LTR/ERV1	ALTR2C_BT	ACAGCTATAGCAGCATGGGGTTCAATCTCCATAGAGGCAGAT
LTR/ERV1	ALTR2C_BT	ACAGATGCACAATTTGAGAGATGTGAATTAAGTTTTATTTGG
LTR/ERV1	ALTR2C_BT	ACAATTTGAGAGATGTGAATTAAGTTTTATTTGGGGCAAAAT
LTR/ERV1	ALTR2C_BT	AATTAAGTTTTATTTGGGGCAAAATGAGGACAGCAGCCCAGG
LTR/ERV1	ALTR2C_BT	AATCCTTGCATCTCTTCATATCTAGAAAAGCACTAAATCCCT
LTR/ERV1	ALTR2C_BT	AATCCTTGCATCTCCTCATATCTAGAGAAACACTAAATCCCT
LTR/ERV1	ALTR2C_BT	AAGTTTTATTTGGGGCAAAATGAGGACTGCAGCCTGGGAGAC
LTR/ERV1	ALTR2C_BT	AAGTTTTATTTGGGGCAAAATGAGGACTGCAGCCCAGGAGAC
LTR/ERV1	ALTR2C_BT	AAGTTTTATTTGGGGCAAAATGAGGACAGCAGCCCAGGAGAC
LTR/ERV1	ALTR2C_BT	AAGGTCAACAGCTATAGCAGCATGGGGTTCAATCTCCATAGA
LTR/ERV1	ALTR2C_BT	AAGGGATTTAGTGTTTCTCTAGATATGAGGAGATGCAAGGAT
LTR/ERV1	ALTR2C_BT	AAGGGATTTAGTGCTTTTCTAGATATGAAGAGATGCAAGGAT
LTR/ERV1	ALTR2C_BT	AAGGAGCTGATGTCACCATGAAGGGATTTAGTGCTTTTCTAG
LTR/ERV1	ALTR2C_BT	AACTACAAATTGGCACTTACCAAGAGCATTGCCAATGACTGA
LTR/ERV1	ALTR2C_BT	AACAGCTATAGCAGCATGGGGTTCAATCTCCATAGAGGCAGA
LTR/ERV1	ALTR2C_BT	AACAGATGCACAATTTGAGAGATGTGAATTAAGTTTTATTTG
LTR/ERV1	ALTR2C_BT	AAAGCAGCAGTGGGGGAAAGTCAATATATAAGGTTTTGGTGA
LTR/ERV1	ALTR2C_BT	AAACTTAATTCACATCTCTCAAATTGTGCATCTGTTTTAGCT
LTR/ERV1	ALTR2C_BT	AAACAGATGCACAATTTGAGAGATGTGAATTAAGTTTTATTT
LTR/ERV1	ALTR2C_BT	AAAACTTAATTCACATCTCTCAAATTGTGCATCTGTTTTAGC
LTR/ERV1	ALTR2C_BT	AAAACCTTATATATTGACTTTCCCCCACTGCTGCTTTGGAGC
LTR/ERV1	ALTR2C_BT	AAAACAGATGCACAATTTGAGAGATGTGAATTAAGTTTTATT
LTR/ERV1	ALTR39_BT	AAAAACTGGCAGAACAGGCCTTCAGATAGTTAGATCTTTTCA
LTR/ERV1	ALTR39_BT	GCCACTCAATGTGCTGTTACTGGACTAGGCCATAAAACAGTA
LTR/ERV1	ALTR39_BT	CACTCAATGTGCTGTTACTGGACTAGGCCATAAAACAGTATC
LTR/ERV1	ALTR39_BT	ATACTGTTTTATGGCCTAGTCCAGTAACAGCACATTGAGTGG
LTR/ERV1	ALTR39_BT	GAAAAACTGGCAGAACAGGCCTTCAGATAGTTAGATCTTTTC
LTR/ERV1	ALTR39_BT	ACAGGCCACTCAATGTGCTGTTACTGGACTAGGCCATAAAAC
LTR/ERV1	ALTR39_BT	GCTCTGGGAAAAACTGGCAGAACAGGCCTTCAGATAGTTAGA
LTR/ERV1	ALTR39_BT	GATCTAACTATCTGAAGGCCTGTTCTGCCAGTTTTTCCCAGA
LTR/ERV1	ALTR39_BT	CTAACTATCTGAAGGCCTGTTCTGCCAGTTTTTCCCAGAGCA
LTR/ERV1	ALTR39_BT	CAGTGTAAGAAACAGCAATTTTGTAAAACAGGTGAAATACAA
LTR/ERV1	ALTR39_BT	CAGGCCACTCAATGTGCTGTTACTGGACTAGGCCATAAAACA
LTR/ERV1	ALTR39_BT	ATCTAACTATCTGAAGGCCTGTTCTGCCAGTTTTTCCCAGAG
LTR/ERV1	ALTR39_BT	AGTGTAAGAAACAGCAATTTTGTAAAACAGGTGAAATACAAA
LTR/ERV1	ALTR39_BT	AGGCCACTCAATGTGCTGTTACTGGACTAGGCCATAAAACAG
LTR/ERV1	ALTR39_BT	AGATCTAACTATCTGAAGGCCTGTTCTGCCAGTTTTTCCCAG
LTR/ERV1	ALTR39_BT	ACTGTTTTATGGCCTAGTCCAGTAACAGCACATTGAGTGGCC
LTR/ERV1	ALTR39_BT	AAGATCTAACTATCTGAAGGCCTGTTCTGCCAGTTTTTCCCA
LTR/ERV1	ALTR39_BT	AAAGATCTAACTATCTGAAGGCCTGTTCTGCCAGTTTTTCCC
LTR/ERV1	ALTR39_BT	AAAAGATCTAACTATCTGAAGGCCTGTTCTGCCAGTTTTTCC
LTR/ERV1	ALTR39_BT	AAAACTGGCAGAACAGGCCTTCAGATAGTTAGATCTTTTCAG
LTR/ERV1	ALTR39_BT	GTGCTCTGGGAAAAACTGGCAGAACAGGCCTTCAGATAGTTA
LTR/ERV1	ALTR39_BT	AGCCTGACACGACTCAGAAAACTCAAGTGTTTAGCAATACAA
LTR/ERV1	ALTR39_BT	GGCACTCTGTGCTCTGGGAAAAACTGGCAGAACAGGCCTTCA
LTR/ERV1	ALTR39_BT	CTGAAGGCCTGTTCTGCCAGTTTTTCCCAGAGCACAGAGTGC
LTR/ERV1	ALTR39_BT	CACTCTGTGCTCTGGGAAAAACTGGCAGAACAGGCCTTCAGA
LTR/ERV1	ALTR39_BT	ATGAGGCACTCTGTGCTCTGGGAAAAACTGGCAGAACAGGCC
LTR/ERV1	ALTR39_BT	AGGCCTGTTCTGCCAGTTTTTCCCAGAGCACAGAGTGCCTCA
LTR/ERV1	ALTR39_BT	ACTCTGTGCTCTGGGAAAAACTGGCAGAACAGGCCTTCAGAT
LTR/ERV1	ALTR39_BT	ACTCAATGTGCTGTTACTGGACTAGGCCATAAAACAGTATCC
LTR/ERV1	ALTR39_BT	AAGCCTGACACGACTCAGAAAACTCAAGTGTTTAGCAATACA
LTR/ERV1	ALTR39_BT	AACTGGCAGAACAGGCCTTCAGATAGTTAGATCTTTTCAGGA
LTR/ERV1	ALTR39_BT	AAACTGGCAGAACAGGCCTTCAGATAGTTAGATCTTTTCAGG
LTR/ERV1	ALTR39_BT	TATTTGTATTTCACCTGTTTTACAAAATTGCTGTTTCTTACA
LTR/ERV1	ALTR39_BT	GTTATTTGTATTTCACCTGTTTTACAAAATTGCTGTTTCTTA
LTR/ERV1	ALTR39_BT	GTAAGAAACAGCAATTTTGTAAAACAGGTGAAATACAAATAA
LTR/ERV1	ALTR39_BT	CTGTTCTGCCAGTTTTTCCCAGAGCACAGAGTGCCTCATTCC
LTR/ERV1	ALTR39_BT	CTCTGTGCTCTGGGAAAAACTGGCAGAACAGGCCTTCAGATA
LTR/ERV1	ALTR39_BT	CTATCTGAAGGCCTGTTCTGCCAGTTTTTCCCAGAGCACAGA
LTR/ERV1	ALTR39_BT	AGGCACTCTGTGCTCTGGGAAAAACTGGCAGAACAGGCCTTC
LTR/ERV1	ALTR39_BT	AGGAATGAGGCACTCTGTGCTCTGGGAAAAACTGGCAGAACA
LTR/ERV1	ALTR39_BT	AATGAGGCACTCTGTGCTCTGGGAAAAACTGGCAGAACAGGC
LTR/ERV1	ALTR39_BT	AAGGCCTGTTCTGCCAGTTTTTCCCAGAGCACAGAGTGCCTC
LTR/ERV1	ALTR39_BT	AAGAAACAGCAATTTTGTAAAACAGGTGAAATACAAATAACA
LTR/ERV1	ALTR39_BT	TTATGGCCTAGTCCAGTAACAGCACATTGAGTGGCCTGTCAA
LTR/ERV1	ALTR39_BT	TGACAGGCCACTCAATGTGCTGTTACTGGACTAGGCCATAAA
LTR/ERV1	ALTR39_BT	TCAGGAATGAGGCACTCTGTGCTCTGGGAAAAACTGGCAGAA
LTR/ERV1	ALTR39_BT	GACAGGCCACTCAATGTGCTGTTACTGGACTAGGCCATAAAA
LTR/ERV1	ALTR39_BT	GAAACAGCAATTTTGTAAAACAGGTGAAATACAAATAACATA
LTR/ERV1	ALTR39_BT	CCTGTTCTGCCAGTTTTTCCCAGAGCACAGAGTGCCTCATTC
LTR/ERV1	ALTR39_BT	CAGGAATGAGGCACTCTGTGCTCTGGGAAAAACTGGCAGAAC
LTR/ERV1	ALTR39_BT	CAGAGCACAGAGTGCCTCATTCCTGATTTTCACCCTGAACTC
LTR/ERV1	ALTR39_BT	ATTTGTATTTCACCTGTTTTACAAAATTGCTGTTTCTTACAC
LTR/ERV1	ALTR39_BT	ATCAGGAATGAGGCACTCTGTGCTCTGGGAAAAACTGGCAGA
LTR/ERV1	ALTR39_BT	AGAAACAGCAATTTTGTAAAACAGGTGAAATACAAATAACAT
LTR/ERV1	ALTR39_BT	AACTATCTGAAGGCCTGTTCTGCCAGTTTTTCCCAGAGCACA
LTR/ERV1	ALTR39_BT	GTTGACAGGCCACTCAATGTGCTGTTACTGGACTAGGCCATA
LTR/ERV1	ALTR39_BT	CCCAGAGCACAGAGTGCCTCATTCCTGATTTTCACCCTGAAC
LTR/ERV1	ALTR39_BT	CCAGTTTTTCCCAGAGCACAGAGTGCCTCATTCCTGATTTTC
LTR/ERV1	ALTR39_BT	CAGTTTTTCCCAGAGCACAGAGTGCCTCATTCCTGATTTTCA
LTR/ERV1	ALTR39_BT	CAGGGTGAAAATCAGGAATGAGGCACTCTGTGCTCTGGGAAA
LTR/ERV1	ALTR39_BT	AGTTCAGGGTGAAAATCAGGAATGAGGCACTCTGTGCTCTGG
LTR/ERV1	ALTR39_BT	AGTGCCAGGTCCAGACTGGGTTTCAGGCCTATTCTTCTAAAA
LTR/ERV1	ALTR39_BT	AGGGTGAAAATCAGGAATGAGGCACTCTGTGCTCTGGGAAAA
LTR/ERV1	ALTR39_BT	AGGAGTTCAGGGTGAAAATCAGGAATGAGGCACTCTGTGCTC
LTR/ERV1	ALTR39_BT	ACAGTGTAAGAAACAGCAATTTTGTAAAACAGGTGAAATACA
LTR/ERV1	ALTR39_BT	ACAGCAATTTTGTAAAACAGGTGAAATACAAATAACATAGCC
LTR/ERV1	ALTR39_BT	AATGGTGGCATCCAAGCCTGACACGACTCAGAAAACTCAAGT
LTR/ERV1	ALTR39_BT	AATCAGGAATGAGGCACTCTGTGCTCTGGGAAAAACTGGCAG
LTR/ERV1	ALTR39_BT	AAGTGCCAGGTCCAGACTGGGTTTCAGGCCTATTCTTCTAAA
LTR/ERV1	ALTR39_BT	AACAGCAATTTTGTAAAACAGGTGAAATACAAATAACATAGC
LTR/ERV1	ALTR39_BT	AAATCAGGAATGAGGCACTCTGTGCTCTGGGAAAAACTGGCA
LTR/ERV1	ALTR39_BT	AAACAGCAATTTTGTAAAACAGGTGAAATACAAATAACATAG
LTR/ERV1	ALTR39_BT	AAAATCAGGAATGAGGCACTCTGTGCTCTGGGAAAAACTGGC
LTR/ERV1	ALTR39_BT	TCCCAGAGCACAGAGTGCCTCATTCCTGATTTTCACCCTGAA
LTR/ERV1	ALTR39_BT	TCAGGGTGAAAATCAGGAATGAGGCACTCTGTGCTCTGGGAA
LTR/ERV1	ALTR39_BT	GGTGAAAATCAGGAATGAGGCACTCTGTGCTCTGGGAAAAAC
LTR/ERV1	ALTR39_BT	GGGTGAAAATCAGGAATGAGGCACTCTGTGCTCTGGGAAAAA
LTR/ERV1	ALTR39_BT	CTCAATGTGCTGTTACTGGACTAGGCCATAAAACAGTATCCA
LTR/ERV1	ALTR39_BT	CAGAGAATTTTGGATACTGTTTTATGGCCTAGTCCAGTAACA
LTR/ERV1	ALTR39_BT	ATGGTGGCATCCAAGCCTGACACGACTCAGAAAACTCAAGTG
LTR/ERV1	ALTR39_BT	AGTTTTTCCCAGAGCACAGAGTGCCTCATTCCTGATTTTCAC
LTR/ERV1	ALTR39_BT	AGAGCACAGAGTGCCTCATTCCTGATTTTCACCCTGAACTCC
LTR/ERV1	ALTR39_BT	AGAGAATTTTGGATACTGTTTTATGGCCTAGTCCAGTAACAG
LTR/ERV1	ALTR39_BT	ACTATCTGAAGGCCTGTTCTGCCAGTTTTTCCCAGAGCACAG
LTR/ERV1	ALTR39_BT	ACACTTGAGTTTTCTGAGTCGTGTCAGGCTTGGATGCCACCA
LTR/ERV1	ALTR39_BT	AATTTTGGATACTGTTTTATGGCCTAGTCCAGTAACAGCACA
LTR/ERV1	ALTR39_BT	AACACTTGAGTTTTCTGAGTCGTGTCAGGCTTGGATGCCACC
LTR/ERV1	ALTR39_BT	TTTATGAGTCCCAATTCTTGCATCTTCTCATACCTAGAGAAA
LTR/ERV1	ALTR39_BT	TTCTCTAGGTATGAGAAGATGCAAGAATTGGGACTCATAAAA
LTR/ERV1	ALTR39_BT	TCAATGTGCTGTTACTGGACTAGGCCATAAAACAGTATCCAA
LTR/ERV1	ALTR39_BT	TAAACACTTGAGTTTTCTGAGTCGTGTCAGGCTTGGATGCCA
LTR/ERV1	ALTR39_BT	GTTTCTCTAGGTATGAGAAGATGCAAGAATTGGGACTCATAA
LTR/ERV1	ALTR39_BT	GCCATAAAACAGTATCCAAAATTCTCTGGACCACCTGTCTTA
LTR/ERV1	ALTR39_BT	CTTGTATTGCTAAACACTTGAGTTTTCTGAGTCGTGTCAGGC
LTR/ERV1	ALTR39_BT	CTCTAGGTATGAGAAGATGCAAGAATTGGGACTCATAAAATC
LTR/ERV1	ALTR39_BT	CCTGACACGACTCAGAAAACTCAAGTGTTTAGCAATACAAGG
LTR/ERV1	ALTR39_BT	CCATAAAACAGTATCCAAAATTCTCTGGACCACCTGTCTTAC
LTR/ERV1	ALTR39_BT	CAATGTGCTGTTACTGGACTAGGCCATAAAACAGTATCCAAA
LTR/ERV1	ALTR39_BT	ATTTTATGAGTCCCAATTCTTGCATCTTCTCATACCTAGAGA
LTR/ERV1	ALTR39_BT	ATGTGCTGTTACTGGACTAGGCCATAAAACAGTATCCAAAAT
LTR/ERV1	ALTR39_BT	ATGGCCTAGTCCAGTAACAGCACATTGAGTGGCCTGTCAACA
LTR/ERV1	ALTR39_BT	AGTAAGACAGGTGGTCCAGAGAATTTTGGATACTGTTTTATG
LTR/ERV1	ALTR39_BT	AGATTTTATGAGTCCCAATTCTTGCATCTTCTCATACCTAGA
LTR/ERV1	ALTR39_BT	AGACAGGTGGTCCAGAGAATTTTGGATACTGTTTTATGGCCT
LTR/ERV1	ALTR39_BT	AATGTGCTGTTACTGGACTAGGCCATAAAACAGTATCCAAAA
LTR/ERV1	ALTR39_BT	AAGACAGGTGGTCCAGAGAATTTTGGATACTGTTTTATGGCC
LTR/ERV1	ALTR39_BT	AAAGACATTGTTATGCATATTTCTTTGAGTAGGAACCAGGAC
LTR/ERV1	ALTR39_BT	AAACACTTGAGTTTTCTGAGTCGTGTCAGGCTTGGATGCCAC
LTR/ERV1	ALTR39_BT	TTATCCCATGGTGCTGAGAATGTCCATTCTCAGGTTTGGCAA
LTR/ERV1	ALTR39_BT	TCTATTTTGACTTTTAATTGTAAACTTTTCCTTAATAGCCAA
LTR/ERV1	ALTR39_BT	TATCTGAACCATAGCTACTCTATTTTGACTTTTAATTGTAAA
LTR/ERV1	ALTR39_BT	TATCCCATGGTGCTGAGAATGTCCATTCTCAGGTTTGGCAAA
LTR/ERV1	ALTR39_BT	GTTATTTCCCAGGATATCTGAACCATAGCTACTCTATTTTGA
LTR/ERV1	ALTR39_BT	GTGTCAGTCTTCAGTTGGCAGAGCCCCTTTTTGCTCATAAAC
LTR/ERV1	ALTR39_BT	GTGCCAGGTCCAGACTGGGTTTCAGGCCTATTCTTCTAAAAA
LTR/ERV1	ALTR39_BT	GTCAGTGTTTCTCTAGGTATGAGAAGATGCAAGAATTGGGAC
LTR/ERV1	ALTR39_BT	GTCAAAATAGAGTAGCTATGGTTCAGATATCCTGGGAAATAA
LTR/ERV1	ALTR39_BT	GGCAGTCCTATGCCCCATTTTGACAGGAAGTTATCACAGTCA
LTR/ERV1	ALTR39_BT	GCATCCAAGCCTGACACGACTCAGAAAACTCAAGTGTTTAGC
LTR/ERV1	ALTR39_BT	GAGAATTTTGGATACTGTTTTATGGCCTAGTCCAGTAACAGC
LTR/ERV1	ALTR39_BT	GACAGGTGGTCCAGAGAATTTTGGATACTGTTTTATGGCCTA
LTR/ERV1	ALTR39_BT	GAATTTTGGATACTGTTTTATGGCCTAGTCCAGTAACAGCAC
LTR/ERV1	ALTR39_BT	CTATTTTGACTTTTAATTGTAAACTTTTCCTTAATAGCCAAA
LTR/ERV1	ALTR39_BT	CTAAACACTTGAGTTTTCTGAGTCGTGTCAGGCTTGGATGCC
LTR/ERV1	ALTR39_BT	CCCTGAAAGGAGTTCAGGGTGAAAATCAGGAATGAGGCACTC
LTR/ERV1	ALTR39_BT	CCAGGTCCAGACTGGGTTTCAGGCCTATTCTTCTAAAAAGAA
LTR/ERV1	ALTR39_BT	CCAGAGAATTTTGGATACTGTTTTATGGCCTAGTCCAGTAAC
LTR/ERV1	ALTR39_BT	CATCCAAGCCTGACACGACTCAGAAAACTCAAGTGTTTAGCA
LTR/ERV1	ALTR39_BT	CAGTGTTTCTCTAGGTATGAGAAGATGCAAGAATTGGGACTC
LTR/ERV1	ALTR39_BT	CAGTCTTCAGTTGGCAGAGCCCCTTTTTGCTCATAAACTTGA
LTR/ERV1	ALTR39_BT	CAGTCCTATGCCCCATTTTGACAGGAAGTTATCACAGTCATA
LTR/ERV1	ALTR39_BT	CACCTAGTTATTTCCCAGGATATCTGAACCATAGCTACTCTA
LTR/ERV1	ALTR39_BT	CAAGTTTATGAGCAAAAAGGGGCTCTGCCAACTGAAGACTGA
LTR/ERV1	ALTR39_BT	ATGAGTCCCAATTCTTGCATCTTCTCATACCTAGAGAAACAC
LTR/ERV1	ALTR39_BT	ATGACTGTGATAACTTCCTGTCAAAATGGGGCATAGGACTGC
LTR/ERV1	ALTR39_BT	ATCTGAACCATAGCTACTCTATTTTGACTTTTAATTGTAAAC
LTR/ERV1	ALTR39_BT	ATCCCATGGTGCTGAGAATGTCCATTCTCAGGTTTGGCAAAG
LTR/ERV1	ALTR39_BT	ATCCAAGCCTGACACGACTCAGAAAACTCAAGTGTTTAGCAA
LTR/ERV1	ALTR39_BT	ATCACCTAGTTATTTCCCAGGATATCTGAACCATAGCTACTC
LTR/ERV1	ALTR39_BT	ATATCTGAACCATAGCTACTCTATTTTGACTTTTAATTGTAA
LTR/ERV1	ALTR39_BT	AGTTTATGAGCAAAAAGGGGCTCTGCCAACTGAAGACTGACA
LTR/ERV1	ALTR39_BT	AGTTTACAATTAAAAGTCAAAATAGAGTAGCTATGGTTCAGA
LTR/ERV1	ALTR39_BT	AGTTATTTCCCAGGATATCTGAACCATAGCTACTCTATTTTG
LTR/ERV1	ALTR39_BT	AGTGTTTCTCTAGGTATGAGAAGATGCAAGAATTGGGACTCA
LTR/ERV1	ALTR39_BT	AGTGTCAGTCTTCAGTTGGCAGAGCCCCTTTTTGCTCATAAA
LTR/ERV1	ALTR39_BT	AGTCCCAATTCTTGCATCTTCTCATACCTAGAGAAACACTGA
LTR/ERV1	ALTR39_BT	AGTCAAAATAGAGTAGCTATGGTTCAGATATCCTGGGAAATA
LTR/ERV1	ALTR39_BT	AGGTGGTCCAGAGAATTTTGGATACTGTTTTATGGCCTAGTC
LTR/ERV1	ALTR39_BT	AGAGTGCCTCATTCCTGATTTTCACCCTGAACTCCTTTCAGG
LTR/ERV1	ALTR39_BT	AGAGTAGCTATGGTTCAGATATCCTGGGAAATAACTAGGTGA
LTR/ERV1	ALTR39_BT	AGAATTTTGGATACTGTTTTATGGCCTAGTCCAGTAACAGCA
LTR/ERV1	ALTR39_BT	ACTAGGCCATAAAACAGTATCCAAAATTCTCTGGACCACCTG
LTR/ERV1	ALTR39_BT	ACAGGTGGTCCAGAGAATTTTGGATACTGTTTTATGGCCTAG
LTR/ERV1	ALTR39_BT	AATCATGGTCAAGTTTATGAGCAAAAAGGGGCTCTGCCAACT
LTR/ERV1	ALTR39_BT	AAGTTTATGAGCAAAAAGGGGCTCTGCCAACTGAAGACTGAC
LTR/ERV1	ALTR39_BT	AAGTTTACAATTAAAAGTCAAAATAGAGTAGCTATGGTTCAG
LTR/ERV1	ALTR39_BT	AAGTCAAAATAGAGTAGCTATGGTTCAGATATCCTGGGAAAT
LTR/ERV1	ALTR39_BT	AAAGTTTACAATTAAAAGTCAAAATAGAGTAGCTATGGTTCA
LTR/ERV1	ALTR39_BT	AAAATAGAGTAGCTATGGTTCAGATATCCTGGGAAATAACTA
LTR/ERV1	ALTR39_BT	AAAAGTTTACAATTAAAAGTCAAAATAGAGTAGCTATGGTTC
LTR/ERV1	ALTR39_BT	TGCCAAACCTGAGAATGGACATTCTCAGCACCATGGGATAAA
LTR/ERV1	ALTR39_BT	TCCCATGGTGCTGAGAATGTCCATTCTCAGGTTTGGCAAAGA
LTR/ERV1	ALTR39_BT	TCCAGAGAATTTTGGATACTGTTTTATGGCCTAGTCCAGTAA
LTR/ERV1	ALTR39_BT	TATGAGTCCCAATTCTTGCATCTTCTCATACCTAGAGAAACA
LTR/ERV1	ALTR39_BT	TAGCTACTCTATTTTGACTTTTAATTGTAAACTTTTCCTTAA
LTR/ERV1	ALTR39_BT	TAAAAGTCAAAATAGAGTAGCTATGGTTCAGATATCCTGGGA
LTR/ERV1	ALTR39_BT	GTGGTCCAGAGAATTTTGGATACTGTTTTATGGCCTAGTCCA
LTR/ERV1	ALTR39_BT	GTCCAGAGAATTTTGGATACTGTTTTATGGCCTAGTCCAGTA
LTR/ERV1	ALTR39_BT	GGACTAGGCCATAAAACAGTATCCAAAATTCTCTGGACCACC
LTR/ERV1	ALTR39_BT	GCTATTAAGGAAAAGTTTACAATTAAAAGTCAAAATAGAGTA
LTR/ERV1	ALTR39_BT	GCCAGGTCCAGACTGGGTTTCAGGCCTATTCTTCTAAAAAGA
LTR/ERV1	ALTR39_BT	GCCAAACCTGAGAATGGACATTCTCAGCACCATGGGATAAAA
LTR/ERV1	ALTR39_BT	GCATCACCTAGTTATTTCCCAGGATATCTGAACCATAGCTAC
LTR/ERV1	ALTR39_BT	GATATCTGAACCATAGCTACTCTATTTTGACTTTTAATTGTA
LTR/ERV1	ALTR39_BT	GACATTCTCAGCACCATGGGATAAAATGGTCATGAAATGCCC
LTR/ERV1	ALTR39_BT	CTTTTTAGAAGAATAGGCCTGAAACCCAGTCTGGACCTGGCA
LTR/ERV1	ALTR39_BT	CTGGACTAGGCCATAAAACAGTATCCAAAATTCTCTGGACCA
LTR/ERV1	ALTR39_BT	CTCTATTTTGACTTTTAATTGTAAACTTTTCCTTAATAGCCA
LTR/ERV1	ALTR39_BT	CTAGTAAGACAGGTGGTCCAGAGAATTTTGGATACTGTTTTA
LTR/ERV1	ALTR39_BT	CTACTCTATTTTGACTTTTAATTGTAAACTTTTCCTTAATAG
LTR/ERV1	ALTR39_BT	CCCAGGATATCTGAACCATAGCTACTCTATTTTGACTTTTAA
LTR/ERV1	ALTR39_BT	CCATAGCATCACCTAGTTATTTCCCAGGATATCTGAACCATA
LTR/ERV1	ALTR39_BT	CCAAGCCTGACACGACTCAGAAAACTCAAGTGTTTAGCAATA
LTR/ERV1	ALTR39_BT	CATTCTCAGCACCATGGGATAAAATGGTCATGAAATGCCCCC
LTR/ERV1	ALTR39_BT	CATAGCATCACCTAGTTATTTCCCAGGATATCTGAACCATAG
LTR/ERV1	ALTR39_BT	CAGGTCCAGACTGGGTTTCAGGCCTATTCTTCTAAAAAGAAA
LTR/ERV1	ALTR39_BT	CAGAGTGCCTCATTCCTGATTTTCACCCTGAACTCCTTTCAG
LTR/ERV1	ALTR39_BT	CACCCATAGCATCACCTAGTTATTTCCCAGGATATCTGAACC
LTR/ERV1	ALTR39_BT	CAAGCCTGACACGACTCAGAAAACTCAAGTGTTTAGCAATAC
LTR/ERV1	ALTR39_BT	CAAACCTGAGAATGGACATTCTCAGCACCATGGGATAAAATG
LTR/ERV1	ALTR39_BT	ATTTTATCCCATGGTGCTGAGAATGTCCATTCTCAGGTTTGG
LTR/ERV1	ALTR39_BT	ATTGCTAAACACTTGAGTTTTCTGAGTCGTGTCAGGCTTGGA
LTR/ERV1	ALTR39_BT	ATTAAAAGTCAAAATAGAGTAGCTATGGTTCAGATATCCTGG
LTR/ERV1	ALTR39_BT	ATGGTTCAGATATCCTGGGAAATAACTAGGTGATGCTATGGG
LTR/ERV1	ALTR39_BT	ATCATGGTCAAGTTTATGAGCAAAAAGGGGCTCTGCCAACTG
LTR/ERV1	ALTR39_BT	ATAGCATCACCTAGTTATTTCCCAGGATATCTGAACCATAGC
LTR/ERV1	ALTR39_BT	ATAAAACAGTATCCAAAATTCTCTGGACCACCTGTCTTACTA
LTR/ERV1	ALTR39_BT	AGTCCTATGCCCCATTTTGACAGGAAGTTATCACAGTCATAG
LTR/ERV1	ALTR39_BT	AGTAGCTATGGTTCAGATATCCTGGGAAATAACTAGGTGATG
LTR/ERV1	ALTR39_BT	AGGATATCTGAACCATAGCTACTCTATTTTGACTTTTAATTG
LTR/ERV1	ALTR39_BT	AGCTATGGTTCAGATATCCTGGGAAATAACTAGGTGATGCTA
LTR/ERV1	ALTR39_BT	AGCATCACCTAGTTATTTCCCAGGATATCTGAACCATAGCTA
LTR/ERV1	ALTR39_BT	ACTGGACTAGGCCATAAAACAGTATCCAAAATTCTCTGGACC
LTR/ERV1	ALTR39_BT	ACTCTATTTTGACTTTTAATTGTAAACTTTTCCTTAATAGCC
LTR/ERV1	ALTR39_BT	ACCTGAGAATGGACATTCTCAGCACCATGGGATAAAATGGTC
LTR/ERV1	ALTR39_BT	ACCTAGTTATTTCCCAGGATATCTGAACCATAGCTACTCTAT
LTR/ERV1	ALTR39_BT	ACCCATAGCATCACCTAGTTATTTCCCAGGATATCTGAACCA
LTR/ERV1	ALTR39_BT	ACATTCTCAGCACCATGGGATAAAATGGTCATGAAATGCCCC
LTR/ERV1	ALTR39_BT	ACACCCATAGCATCACCTAGTTATTTCCCAGGATATCTGAAC
LTR/ERV1	ALTR39_BT	ACAATTAAAAGTCAAAATAGAGTAGCTATGGTTCAGATATCC
LTR/ERV1	ALTR39_BT	AATTAAAAGTCAAAATAGAGTAGCTATGGTTCAGATATCCTG
LTR/ERV1	ALTR39_BT	AATAGAGTAGCTATGGTTCAGATATCCTGGGAAATAACTAGG
LTR/ERV1	ALTR39_BT	AAGGAGTTCAGGGTGAAAATCAGGAATGAGGCACTCTGTGCT
LTR/ERV1	ALTR39_BT	AACCTGAGAATGGACATTCTCAGCACCATGGGATAAAATGGT
LTR/ERV1	ALTR39_BT	AAAGTCAAAATAGAGTAGCTATGGTTCAGATATCCTGGGAAA
LTR/ERV1	ALTR39_BT	AAAGGAGTTCAGGGTGAAAATCAGGAATGAGGCACTCTGTGC
LTR/ERV1	ALTR39_BT	AAACCTGAGAATGGACATTCTCAGCACCATGGGATAAAATGG
LTR/ERV1	ALTR39_BT	AAAAGTCAAAATAGAGTAGCTATGGTTCAGATATCCTGGGAA
LTR/ERV1	ALTR39_BT	AAAACAGTATCCAAAATTCTCTGGACCACCTGTCTTACTAGC
LTR/ERV1	ALTR39_BT	TGGTGTAACAGACCCAATTAGAAGTAGTTGGAGGAGTGATAA
LTR/ERV1	ALTR39_BT	TCTTCAGTTGGCAGAGCCCCTTTTTGCTCATAAACTTGACCA
LTR/ERV1	ALTR39_BT	TCCTGGGAAATAACTAGGTGATGCTATGGGTGTACTTTCAGA
LTR/ERV1	ALTR39_BT	TCAGTTGGCAGAGCCCCTTTTTGCTCATAAACTTGACCATGA
LTR/ERV1	ALTR39_BT	TCAGAAAACTCAAGTGTTTAGCAATACAAGGTCTAATCTGAA
LTR/ERV1	ALTR39_BT	TCACTCCTCCAACTACTTCTAATTGGGTCTGTTACACCAAAA
LTR/ERV1	ALTR39_BT	TATCACTCCTCCAACTACTTCTAATTGGGTCTGTTACACCAA
LTR/ERV1	ALTR39_BT	TAATATATAGTCCCATATGAGATCGATGATGGTAACAGTGTA
LTR/ERV1	ALTR39_BT	GTTCTGTGTTCTCCATTTCTTGTCTGTAGGATATAGGCTTCA
LTR/ERV1	ALTR39_BT	GTCCAGACTGGGTTTCAGGCCTATTCTTCTAAAAAGAAATGA
LTR/ERV1	ALTR39_BT	GGGTGTACTTTCAGATTAGACCTTGTATTGCTAAACACTTGA
LTR/ERV1	ALTR39_BT	GCTACTCTATTTTGACTTTTAATTGTAAACTTTTCCTTAATA
LTR/ERV1	ALTR39_BT	GCTACAAGTCTCCCTGAAGTGCCAGGTCCAGACTGGGTTTCA
LTR/ERV1	ALTR39_BT	GAAGTGCCAGGTCCAGACTGGGTTTCAGGCCTATTCTTCTAA
LTR/ERV1	ALTR39_BT	GAAACCCAGTCTGGACCTGGCACTTCAGGGAGACTTGTAGCC
LTR/ERV1	ALTR39_BT	CTGGCAGAACAGGCCTTCAGATAGTTAGATCTTTTCAGGAGA
LTR/ERV1	ALTR39_BT	CTCAAGTGTTTAGCAATACAAGGTCTAATCTGAAAGTACACC
LTR/ERV1	ALTR39_BT	CTCAAAGACATTGTTATGCATATTTCTTTGAGTAGGAACCAG
LTR/ERV1	ALTR39_BT	CTACAAGTCTCCCTGAAGTGCCAGGTCCAGACTGGGTTTCAG
LTR/ERV1	ALTR39_BT	CTAATCTGAAAGTACACCCATAGCATCACCTAGTTATTTCCC
LTR/ERV1	ALTR39_BT	CCTGGTTCCTACTCAAAGAAATATGCATAACAATGTCTTTGA
LTR/ERV1	ALTR39_BT	CCTGAGAATGGACATTCTCAGCACCATGGGATAAAATGGTCA
LTR/ERV1	ALTR39_BT	CCATCATCGATCTCATATGGGACTATATATTATTCTATTAGA
LTR/ERV1	ALTR39_BT	CATTTCTTTTTAGAAGAATAGGCCTGAAACCCAGTCTGGACC
LTR/ERV1	ALTR39_BT	CATGGTCAAGTTTATGAGCAAAAAGGGGCTCTGCCAACTGAA
LTR/ERV1	ALTR39_BT	CAGAAAACTCAAGTGTTTAGCAATACAAGGTCTAATCTGAAA
LTR/ERV1	ALTR39_BT	CACAGAGTGCCTCATTCCTGATTTTCACCCTGAACTCCTTTC
LTR/ERV1	ALTR39_BT	CAAGTGTTTAGCAATACAAGGTCTAATCTGAAAGTACACCCA
LTR/ERV1	ALTR39_BT	CAAAGACATTGTTATGCATATTTCTTTGAGTAGGAACCAGGA
LTR/ERV1	ALTR39_BT	ATTTTGGTGTAACAGACCCAATTAGAAGTAGTTGGAGGAGTG
LTR/ERV1	ALTR39_BT	ATGGTCAAGTTTATGAGCAAAAAGGGGCTCTGCCAACTGAAG
LTR/ERV1	ALTR39_BT	ATGAAGCCTATATCCTACAGACAAGAAATGGAGAACACAGAA
LTR/ERV1	ALTR39_BT	ATCTTTGCCAAACCTGAGAATGGACATTCTCAGCACCATGGG
LTR/ERV1	ALTR39_BT	ATCTGAAAGTACACCCATAGCATCACCTAGTTATTTCCCAGG
LTR/ERV1	ALTR39_BT	ATCTAGAGTTACACTGTTACCATCATCGATCTCATATGGGAC
LTR/ERV1	ALTR39_BT	ATCCTGGGAAATAACTAGGTGATGCTATGGGTGTACTTTCAG
LTR/ERV1	ALTR39_BT	ATCACTCCTCCAACTACTTCTAATTGGGTCTGTTACACCAAA
LTR/ERV1	ALTR39_BT	ATATATAGTCCCATATGAGATCGATGATGGTAACAGTGTAAC
LTR/ERV1	ALTR39_BT	ATATAGTCCCATATGAGATCGATGATGGTAACAGTGTAACTC
LTR/ERV1	ALTR39_BT	ATAGCTACTCTATTTTGACTTTTAATTGTAAACTTTTCCTTA
LTR/ERV1	ALTR39_BT	AGTTACACTGTTACCATCATCGATCTCATATGGGACTATATA
LTR/ERV1	ALTR39_BT	AGGTCCAGACTGGGTTTCAGGCCTATTCTTCTAAAAAGAAAT
LTR/ERV1	ALTR39_BT	AGGAAAAGTTTACAATTAAAAGTCAAAATAGAGTAGCTATGG
LTR/ERV1	ALTR39_BT	AGCTACTCTATTTTGACTTTTAATTGTAAACTTTTCCTTAAT
LTR/ERV1	ALTR39_BT	ACTGTTACCATCATCGATCTCATATGGGACTATATATTATTC
LTR/ERV1	ALTR39_BT	ACTGGCAGAACAGGCCTTCAGATAGTTAGATCTTTTCAGGAG
LTR/ERV1	ALTR39_BT	ACCATCATCGATCTCATATGGGACTATATATTATTCTATTAG
LTR/ERV1	ALTR39_BT	ACCATAGCTACTCTATTTTGACTTTTAATTGTAAACTTTTCC
LTR/ERV1	ALTR39_BT	ACAGAGTGCCTCATTCCTGATTTTCACCCTGAACTCCTTTCA
LTR/ERV1	ALTR39_BT	ACACTGTTACCATCATCGATCTCATATGGGACTATATATTAT
LTR/ERV1	ALTR39_BT	AATGAAGCCTATATCCTACAGACAAGAAATGGAGAACACAGA
LTR/ERV1	ALTR39_BT	AATCTTTGCCAAACCTGAGAATGGACATTCTCAGCACCATGG
LTR/ERV1	ALTR39_BT	AATCTGAAAGTACACCCATAGCATCACCTAGTTATTTCCCAG
LTR/ERV1	ALTR39_BT	AATATATAGTCCCATATGAGATCGATGATGGTAACAGTGTAA
LTR/ERV1	ALTR39_BT	AATAATATATAGTCCCATATGAGATCGATGATGGTAACAGTG
LTR/ERV1	ALTR39_BT	AAGGAAAAGTTTACAATTAAAAGTCAAAATAGAGTAGCTATG
LTR/ERV1	ALTR39_BT	AACCATAGCTACTCTATTTTGACTTTTAATTGTAAACTTTTC
LTR/ERV1	ALTR39_BT	AAATAGAGTAGCTATGGTTCAGATATCCTGGGAAATAACTAG
LTR/ERV1	ALTR39_BT	AAACCCAGTCTGGACCTGGCACTTCAGGGAGACTTGTAGCCA
LTR/ERV1	ALTR39_BT	TGAATGAAGCCTATATCCTACAGACAAGAAATGGAGAACACA
LTR/ERV1	ALTR39_BT	TATCTAGAGTTACACTGTTACCATCATCGATCTCATATGGGA
LTR/ERV1	ALTR39_BT	TATCCTGGGAAATAACTAGGTGATGCTATGGGTGTACTTTCA
LTR/ERV1	ALTR39_BT	TAGAATAATATATAGTCCCATATGAGATCGATGATGGTAACA
LTR/ERV1	ALTR39_BT	TACACCCATAGCATCACCTAGTTATTTCCCAGGATATCTGAA
LTR/ERV1	ALTR39_BT	TAATCTGAAAGTACACCCATAGCATCACCTAGTTATTTCCCA
LTR/ERV1	ALTR39_BT	GTACACCCATAGCATCACCTAGTTATTTCCCAGGATATCTGA
LTR/ERV1	ALTR39_BT	GGTGTAACAGACCCAATTAGAAGTAGTTGGAGGAGTGATAAC
LTR/ERV1	ALTR39_BT	GGTCAAGTTTATGAGCAAAAAGGGGCTCTGCCAACTGAAGAC
LTR/ERV1	ALTR39_BT	GATAAAATGGTCATGAAATGCCCCCCTCAAAATCATGGTCAA
LTR/ERV1	ALTR39_BT	GAGAATGGACATTCTCAGCACCATGGGATAAAATGGTCATGA
LTR/ERV1	ALTR39_BT	GAAGCCTATATCCTACAGACAAGAAATGGAGAACACAGAACA
LTR/ERV1	ALTR39_BT	CTGTGTTCTCCATTTCTTGTCTGTAGGATATAGGCTTCATTC
LTR/ERV1	ALTR39_BT	CTGAATGAAGCCTATATCCTACAGACAAGAAATGGAGAACAC
LTR/ERV1	ALTR39_BT	CTCATTTCTTTTTAGAAGAATAGGCCTGAAACCCAGTCTGGA
LTR/ERV1	ALTR39_BT	CTCAGAAAACTCAAGTGTTTAGCAATACAAGGTCTAATCTGA
LTR/ERV1	ALTR39_BT	CTATGCCCCATTTTGACAGGAAGTTATCACAGTCATAGTTGC
LTR/ERV1	ALTR39_BT	CTAGAGTTACACTGTTACCATCATCGATCTCATATGGGACTA
LTR/ERV1	ALTR39_BT	CGATCTCATATGGGACTATATATTATTCTATTAGAGGCCTCA
LTR/ERV1	ALTR39_BT	CCATTTTGGTGTAACAGACCCAATTAGAAGTAGTTGGAGGAG
LTR/ERV1	ALTR39_BT	CCAGACTGGGTTTCAGGCCTATTCTTCTAAAAAGAAATGAGA
LTR/ERV1	ALTR39_BT	CATGACCATTTTATCCCATGGTGCTGAGAATGTCCATTCTCA
LTR/ERV1	ALTR39_BT	CATATCTAGAGTTACACTGTTACCATCATCGATCTCATATGG
LTR/ERV1	ALTR39_BT	CAGTGTAACTCTAGATATGGCAAGAAGCAACAAGAGGGAATA
LTR/ERV1	ALTR39_BT	CAACTATGACTGTGATAACTTCCTGTCAAAATGGGGCATAGG
LTR/ERV1	ALTR39_BT	ATTCTCAGCACCATGGGATAAAATGGTCATGAAATGCCCCCC
LTR/ERV1	ALTR39_BT	ATGACCATTTTATCCCATGGTGCTGAGAATGTCCATTCTCAG
LTR/ERV1	ALTR39_BT	ATCTCATTTCTTTTTAGAAGAATAGGCCTGAAACCCAGTCTG
LTR/ERV1	ALTR39_BT	ATATCTAGAGTTACACTGTTACCATCATCGATCTCATATGGG
LTR/ERV1	ALTR39_BT	ATATCCTGGGAAATAACTAGGTGATGCTATGGGTGTACTTTC
LTR/ERV1	ALTR39_BT	ATAGTCCCATATGAGATCGATGATGGTAACAGTGTAACTCTA
LTR/ERV1	ALTR39_BT	ATAGAATAATATATAGTCCCATATGAGATCGATGATGGTAAC
LTR/ERV1	ALTR39_BT	ATAAAATGGTCATGAAATGCCCCCCTCAAAATCATGGTCAAG
LTR/ERV1	ALTR39_BT	ATAAAATCTTCTCCTGAAAAGATCTAACTATCTGAAGGCCTG
LTR/ERV1	ALTR39_BT	AGTTATCACTCCTCCAACTACTTCTAATTGGGTCTGTTACAC
LTR/ERV1	ALTR39_BT	AGTGTAACTCTAGATATGGCAAGAAGCAACAAGAGGGAATAT
LTR/ERV1	ALTR39_BT	AGTGCCTCATTCCTGATTTTCACCCTGAACTCCTTTCAGGGG
LTR/ERV1	ALTR39_BT	AGTCTTCAGTTGGCAGAGCCCCTTTTTGCTCATAAACTTGAC
LTR/ERV1	ALTR39_BT	AGTCCCATATGAGATCGATGATGGTAACAGTGTAACTCTAGA
LTR/ERV1	ALTR39_BT	AGTACACCCATAGCATCACCTAGTTATTTCCCAGGATATCTG
LTR/ERV1	ALTR39_BT	AGGCCTTCAGATAGTTAGATCTTTTCAGGAGAAGATTTTATG
LTR/ERV1	ALTR39_BT	AGAGTTACACTGTTACCATCATCGATCTCATATGGGACTATA
LTR/ERV1	ALTR39_BT	AGAATGGACATTCTCAGCACCATGGGATAAAATGGTCATGAA
LTR/ERV1	ALTR39_BT	AGAATAATATATAGTCCCATATGAGATCGATGATGGTAACAG
LTR/ERV1	ALTR39_BT	AGAAAACTCAAGTGTTTAGCAATACAAGGTCTAATCTGAAAG
LTR/ERV1	ALTR39_BT	ACTTTCAGATTAGACCTTGTATTGCTAAACACTTGAGTTTTC
LTR/ERV1	ALTR39_BT	ACTCCTCCAACTACTTCTAATTGGGTCTGTTACACCAAAATG
LTR/ERV1	ALTR39_BT	ACTCAAGTGTTTAGCAATACAAGGTCTAATCTGAAAGTACAC
LTR/ERV1	ALTR39_BT	ACTATGACTGTGATAACTTCCTGTCAAAATGGGGCATAGGAC
LTR/ERV1	ALTR39_BT	ACAGTGTAACTCTAGATATGGCAAGAAGCAACAAGAGGGAAT
LTR/ERV1	ALTR39_BT	ACAGGCCTTCAGATAGTTAGATCTTTTCAGGAGAAGATTTTA
LTR/ERV1	ALTR39_BT	AATATTCCCTCTTGTTGCTTCTTGCCATATCTAGAGTTACAC
LTR/ERV1	ALTR39_BT	AATAGAATAATATATAGTCCCATATGAGATCGATGATGGTAA
LTR/ERV1	ALTR39_BT	AAGTGTTTAGCAATACAAGGTCTAATCTGAAAGTACACCCAT
LTR/ERV1	ALTR39_BT	AAGTACACCCATAGCATCACCTAGTTATTTCCCAGGATATCT
LTR/ERV1	ALTR39_BT	AACTCAAGTGTTTAGCAATACAAGGTCTAATCTGAAAGTACA
LTR/ERV1	ALTR39_BT	AACTATGACTGTGATAACTTCCTGTCAAAATGGGGCATAGGA
LTR/ERV1	ALTR39_BT	AACAGTGTAACTCTAGATATGGCAAGAAGCAACAAGAGGGAA
LTR/ERV1	ALTR39_BT	AAAGTACACCCATAGCATCACCTAGTTATTTCCCAGGATATC
LTR/ERV1	ALTR39_BT	AAACTCAAGTGTTTAGCAATACAAGGTCTAATCTGAAAGTAC
LTR/ERV1	ALTR39_BT	AAAATCTTCTCCTGAAAAGATCTAACTATCTGAAGGCCTGTT
LTR/ERV1	ALTR39_BT	AAAACTCAAGTGTTTAGCAATACAAGGTCTAATCTGAAAGTA
LTR/ERV1	ALTR39_BT	TGGCAGAACAGGCCTTCAGATAGTTAGATCTTTTCAGGAGAA
LTR/ERV1	ALTR39_BT	TCAGCACCATGGGATAAAATGGTCATGAAATGCCCCCCTCAA
LTR/ERV1	ALTR39_BT	TAGCAATACAAGGTCTAATCTGAAAGTACACCCATAGCATCA
LTR/ERV1	ALTR39_BT	TAATAGAATAATATATAGTCCCATATGAGATCGATGATGGTA
LTR/ERV1	ALTR39_BT	TAACAGTGTAACTCTAGATATGGCAAGAAGCAACAAGAGGGA
LTR/ERV1	ALTR39_BT	GGCCTTCAGATAGTTAGATCTTTTCAGGAGAAGATTTTATGA
LTR/ERV1	ALTR39_BT	GGCAACTATGACTGTGATAACTTCCTGTCAAAATGGGGCATA
LTR/ERV1	ALTR39_BT	GCTGAATGAAGCCTATATCCTACAGACAAGAAATGGAGAACA
LTR/ERV1	ALTR39_BT	GCCTCTAATAGAATAATATATAGTCCCATATGAGATCGATGA
LTR/ERV1	ALTR39_BT	GCCATTTTGGTGTAACAGACCCAATTAGAAGTAGTTGGAGGA
LTR/ERV1	ALTR39_BT	GCAGAACAGGCCTTCAGATAGTTAGATCTTTTCAGGAGAAGA
LTR/ERV1	ALTR39_BT	GATGCTATGGGTGTACTTTCAGATTAGACCTTGTATTGCTAA
LTR/ERV1	ALTR39_BT	GAGGCCTCTAATAGAATAATATATAGTCCCATATGAGATCGA
LTR/ERV1	ALTR39_BT	GACCTTGTATTGCTAAACACTTGAGTTTTCTGAGTCGTGTCA
LTR/ERV1	ALTR39_BT	CTTCTCCTGAAAAGATCTAACTATCTGAAGGCCTGTTCTGCC
LTR/ERV1	ALTR39_BT	CGACTCAGAAAACTCAAGTGTTTAGCAATACAAGGTCTAATC
LTR/ERV1	ALTR39_BT	CCTCCAACTACTTCTAATTGGGTCTGTTACACCAAAATGGCA
LTR/ERV1	ALTR39_BT	CCTATATCCTACAGACAAGAAATGGAGAACACAGAACAGATC
LTR/ERV1	ALTR39_BT	CATCGATCTCATATGGGACTATATATTATTCTATTAGAGGCC
LTR/ERV1	ALTR39_BT	CATCATCGATCTCATATGGGACTATATATTATTCTATTAGAG
LTR/ERV1	ALTR39_BT	CAGCACCATGGGATAAAATGGTCATGAAATGCCCCCCTCAAA
LTR/ERV1	ALTR39_BT	ATCTTCTCCTGAAAAGATCTAACTATCTGAAGGCCTGTTCTG
LTR/ERV1	ALTR39_BT	ATCTGTTCTGTGTTCTCCATTTCTTGTCTGTAGGATATAGGC
LTR/ERV1	ALTR39_BT	ATCATCGATCTCATATGGGACTATATATTATTCTATTAGAGG
LTR/ERV1	ALTR39_BT	AGGCCTCTAATAGAATAATATATAGTCCCATATGAGATCGAT
LTR/ERV1	ALTR39_BT	AGCCTATATCCTACAGACAAGAAATGGAGAACACAGAACAGA
LTR/ERV1	ALTR39_BT	AGATTAGACCTTGTATTGCTAAACACTTGAGTTTTCTGAGTC
LTR/ERV1	ALTR39_BT	AGATCTGTTCTGTGTTCTCCATTTCTTGTCTGTAGGATATAG
LTR/ERV1	ALTR39_BT	AGACCTTGTATTGCTAAACACTTGAGTTTTCTGAGTCGTGTC
LTR/ERV1	ALTR39_BT	ACTCTGTGGGGCTCTGGAGTACAGATCTGTTCTGTGTTCTCC
LTR/ERV1	ALTR39_BT	ACTCAGAAAACTCAAGTGTTTAGCAATACAAGGTCTAATCTG
LTR/ERV1	ALTR39_BT	ACCTTGTATTGCTAAACACTTGAGTTTTCTGAGTCGTGTCAG
LTR/ERV1	ALTR39_BT	ACACGACTCAGAAAACTCAAGTGTTTAGCAATACAAGGTCTA
LTR/ERV1	ALTR39_BT	AATCTTCTCCTGAAAAGATCTAACTATCTGAAGGCCTGTTCT
LTR/ERV1	ALTR39_BT	AATCTCATTTCTTTTTAGAAGAATAGGCCTGAAACCCAGTCT
LTR/ERV1	ALTR39_BT	AAGCCTATATCCTACAGACAAGAAATGGAGAACACAGAACAG
LTR/ERV1	ALTR39_BT	AAATCTTCTCCTGAAAAGATCTAACTATCTGAAGGCCTGTTC
LTR/ERV1	ALTR39_BT	TGCTTTGGCTATTAAGGAAAAGTTTACAATTAAAAGTCAAAA
LTR/ERV1	ALTR39_BT	TGATGGTAACAGTGTAACTCTAGATATGGCAAGAAGCAACAA
LTR/ERV1	ALTR39_BT	TGAAATCTGCTTTGGCTATTAAGGAAAAGTTTACAATTAAAA
LTR/ERV1	ALTR39_BT	TCTGCTTTGGCTATTAAGGAAAAGTTTACAATTAAAAGTCAA
LTR/ERV1	ALTR39_BT	TCCAACTACTTCTAATTGGGTCTGTTACACCAAAATGGCAGA
LTR/ERV1	ALTR39_BT	GTTTAGCAATACAAGGTCTAATCTGAAAGTACACCCATAGCA
LTR/ERV1	ALTR39_BT	GTGTGTGAGGCCTCTAATAGAATAATATATAGTCCCATATGA
LTR/ERV1	ALTR39_BT	GTGTGAGGCCTCTAATAGAATAATATATAGTCCCATATGAGA
LTR/ERV1	ALTR39_BT	GTGAAATCTGCTTTGGCTATTAAGGAAAAGTTTACAATTAAA
LTR/ERV1	ALTR39_BT	GGCTGAATGAAGCCTATATCCTACAGACAAGAAATGGAGAAC
LTR/ERV1	ALTR39_BT	GGCAACAGAGCTGTGCTCCAGGAATCTTGTGTTCAGTCTGAA
LTR/ERV1	ALTR39_BT	GGACATTCTCAGCACCATGGGATAAAATGGTCATGAAATGCC
LTR/ERV1	ALTR39_BT	GCTATGGGTGTACTTTCAGATTAGACCTTGTATTGCTAAACA
LTR/ERV1	ALTR39_BT	GCATTTCATGACCATTTTATCCCATGGTGCTGAGAATGTCCA
LTR/ERV1	ALTR39_BT	GCAAGAATTGGGACTCATAAAATCTTCTCCTGAAAAGATCTA
LTR/ERV1	ALTR39_BT	GATGCCACCATTCTCAAAACAATGTCTGCTGGAAGCTAGTAA
LTR/ERV1	ALTR39_BT	GATCTCATATGGGACTATATATTATTCTATTAGAGGCCTCAC
LTR/ERV1	ALTR39_BT	GAGGGGGGCATTTCATGACCATTTTATCCCATGGTGCTGAGA
LTR/ERV1	ALTR39_BT	GAGAAGATGCAAGAATTGGGACTCATAAAATCTTCTCCTGAA
LTR/ERV1	ALTR39_BT	GAATTGGGACTCATAAAATCTTCTCCTGAAAAGATCTAACTA
LTR/ERV1	ALTR39_BT	GAATGGACATTCTCAGCACCATGGGATAAAATGGTCATGAAA
LTR/ERV1	ALTR39_BT	CTTTTAATTGTAAACTTTTCCTTAATAGCCAAAGCAGATTTC
LTR/ERV1	ALTR39_BT	CTTTGGCTATTAAGGAAAAGTTTACAATTAAAAGTCAAAATA
LTR/ERV1	ALTR39_BT	CTTGTTGCTTCTTGCCATATCTAGAGTTACACTGTTACCATC
LTR/ERV1	ALTR39_BT	CTTCAGACTGAACACAAGATTCCTGGAGCACAGCTCTGTTGC
LTR/ERV1	ALTR39_BT	CTGCTTTGGCTATTAAGGAAAAGTTTACAATTAAAAGTCAAA
LTR/ERV1	ALTR39_BT	CTCTTGTTGCTTCTTGCCATATCTAGAGTTACACTGTTACCA
LTR/ERV1	ALTR39_BT	CTCCAACTACTTCTAATTGGGTCTGTTACACCAAAATGGCAG
LTR/ERV1	ALTR39_BT	CTCATATGGGACTATATATTATTCTATTAGAGGCCTCACACA
LTR/ERV1	ALTR39_BT	CTCATAAAATCTTCTCCTGAAAAGATCTAACTATCTGAAGGC
LTR/ERV1	ALTR39_BT	CTCAGCACCATGGGATAAAATGGTCATGAAATGCCCCCCTCA
LTR/ERV1	ALTR39_BT	CCTGAAACCCAGTCTGGACCTGGCACTTCAGGGAGACTTGTA
LTR/ERV1	ALTR39_BT	CCTCTTGTTGCTTCTTGCCATATCTAGAGTTACACTGTTACC
LTR/ERV1	ALTR39_BT	CCAACTACTTCTAATTGGGTCTGTTACACCAAAATGGCAGAC
LTR/ERV1	ALTR39_BT	CATTTTGACAGGAAGTTATCACAGTCATAGTTGCCTAGTTCC
LTR/ERV1	ALTR39_BT	CATGATTTTGAGGGGGGCATTTCATGACCATTTTATCCCATG
LTR/ERV1	ALTR39_BT	CATATGGGACTATATATTATTCTATTAGAGGCCTCACACACA
LTR/ERV1	ALTR39_BT	CAGTTATCACTCCTCCAACTACTTCTAATTGGGTCTGTTACA
LTR/ERV1	ALTR39_BT	CAAGTCTCCCTGAAGTGCCAGGTCCAGACTGGGTTTCAGGCC
LTR/ERV1	ALTR39_BT	CAAGAATTGGGACTCATAAAATCTTCTCCTGAAAAGATCTAA
LTR/ERV1	ALTR39_BT	ATTTTGAGGGGGGCATTTCATGACCATTTTATCCCATGGTGC
LTR/ERV1	ALTR39_BT	ATTTTGACTTTTAATTGTAAACTTTTCCTTAATAGCCAAAGC
LTR/ERV1	ALTR39_BT	ATTTTGACAGGAAGTTATCACAGTCATAGTTGCCTAGTTCCC
LTR/ERV1	ALTR39_BT	ATTTGACAGTGTAAGAAACAGCAATTTTGTAAAACAGGTGAA
LTR/ERV1	ALTR39_BT	ATGGTAACAGTGTAACTCTAGATATGGCAAGAAGCAACAAGA
LTR/ERV1	ALTR39_BT	ATGGACATTCTCAGCACCATGGGATAAAATGGTCATGAAATG
LTR/ERV1	ALTR39_BT	ATGCTATGGGTGTACTTTCAGATTAGACCTTGTATTGCTAAA
LTR/ERV1	ALTR39_BT	ATGATGGTAACAGTGTAACTCTAGATATGGCAAGAAGCAACA
LTR/ERV1	ALTR39_BT	ATCTGCTTTGGCTATTAAGGAAAAGTTTACAATTAAAAGTCA
LTR/ERV1	ALTR39_BT	ATCTCATATGGGACTATATATTATTCTATTAGAGGCCTCACA
LTR/ERV1	ALTR39_BT	ATAGGCCTGAAACCCAGTCTGGACCTGGCACTTCAGGGAGAC
LTR/ERV1	ALTR39_BT	AGTGTTTAGCAATACAAGGTCTAATCTGAAAGTACACCCATA
LTR/ERV1	ALTR39_BT	AGGGGGGCATTTCATGACCATTTTATCCCATGGTGCTGAGAA
LTR/ERV1	ALTR39_BT	AGGGAACTAGGCAACTATGACTGTGATAACTTCCTGTCAAAA
LTR/ERV1	ALTR39_BT	AGCAATACAAGGTCTAATCTGAAAGTACACCCATAGCATCAC
LTR/ERV1	ALTR39_BT	AGATCTTTTCAGGAGAAGATTTTATGAGTCCCAATTCTTGCA
LTR/ERV1	ALTR39_BT	AGAATTGGGACTCATAAAATCTTCTCCTGAAAAGATCTAACT
LTR/ERV1	ALTR39_BT	AGAAGATGCAAGAATTGGGACTCATAAAATCTTCTCCTGAAA
LTR/ERV1	ALTR39_BT	AGAAATGGAGAACACAGAACAGATCTGTACTCCAGAGCCCCA
LTR/ERV1	ALTR39_BT	ACAAGTCTCCCTGAAGTGCCAGGTCCAGACTGGGTTTCAGGC
LTR/ERV1	ALTR39_BT	AATTCCAGTTATCACTCCTCCAACTACTTCTAATTGGGTCTG
LTR/ERV1	ALTR39_BT	AATGGACATTCTCAGCACCATGGGATAAAATGGTCATGAAAT
LTR/ERV1	ALTR39_BT	AATCTGCTTTGGCTATTAAGGAAAAGTTTACAATTAAAAGTC
LTR/ERV1	ALTR39_BT	AATAGGCCTGAAACCCAGTCTGGACCTGGCACTTCAGGGAGA
LTR/ERV1	ALTR39_BT	AAGAATTGGGACTCATAAAATCTTCTCCTGAAAAGATCTAAC
LTR/ERV1	ALTR39_BT	AAGAAATGGAGAACACAGAACAGATCTGTACTCCAGAGCCCC
LTR/ERV1	ALTR39_BT	AACTCAGAAATACTTCCAATTCAGTGTCTATACTCCAAGCTG
LTR/ERV1	ALTR39_BT	AAATCTGCTTTGGCTATTAAGGAAAAGTTTACAATTAAAAGT
LTR/ERV1	ALTR39_BT	TTTCACCTGTTTTACAAAATTGCTGTTTCTTACACTGTCAAA
LTR/ERV1	ALTR39_BT	TTGGAACTCAGAAATACTTCCAATTCAGTGTCTATACTCCAA
LTR/ERV1	ALTR39_BT	TTAGGGAACTAGGCAACTATGACTGTGATAACTTCCTGTCAA
LTR/ERV1	ALTR39_BT	TGACAGGAAGTTATCACAGTCATAGTTGCCTAGTTCCCTAAA
LTR/ERV1	ALTR39_BT	TATTTCACCTGTTTTACAAAATTGCTGTTTCTTACACTGTCA
LTR/ERV1	ALTR39_BT	TAGGGAACTAGGCAACTATGACTGTGATAACTTCCTGTCAAA
LTR/ERV1	ALTR39_BT	TAGAAGAATAGGCCTGAAACCCAGTCTGGACCTGGCACTTCA
LTR/ERV1	ALTR39_BT	TAACAGACCCAATTAGAAGTAGTTGGAGGAGTGATAACTGGA
LTR/ERV1	ALTR39_BT	GTCCAGGAAAATATTCCCTCTTGTTGCTTCTTGCCATATCTA
LTR/ERV1	ALTR39_BT	GGATAAAATGGTCATGAAATGCCCCCCTCAAAATCATGGTCA
LTR/ERV1	ALTR39_BT	GGAAATAACTAGGTGATGCTATGGGTGTACTTTCAGATTAGA
LTR/ERV1	ALTR39_BT	GCTTGGAGTATAGACACTGAATTGGAAGTATTTCTGAGTTCC
LTR/ERV1	ALTR39_BT	GCAATACAAGGTCTAATCTGAAAGTACACCCATAGCATCACC
LTR/ERV1	ALTR39_BT	GAGGCTGAATGAAGCCTATATCCTACAGACAAGAAATGGAGA
LTR/ERV1	ALTR39_BT	GACTGAACACAAGATTCCTGGAGCACAGCTCTGTTGCCTCAC
LTR/ERV1	ALTR39_BT	GACTCTGTGGGGCTCTGGAGTACAGATCTGTTCTGTGTTCTC
LTR/ERV1	ALTR39_BT	GACCCAATTAGAAGTAGTTGGAGGAGTGATAACTGGAATTTA
LTR/ERV1	ALTR39_BT	GACCATGATTTTGAGGGGGGCATTTCATGACCATTTTATCCC
LTR/ERV1	ALTR39_BT	GACAGTGTAAGAAACAGCAATTTTGTAAAACAGGTGAAATAC
LTR/ERV1	ALTR39_BT	GAAGATGCAAGAATTGGGACTCATAAAATCTTCTCCTGAAAA
LTR/ERV1	ALTR39_BT	GAAATAACTAGGTGATGCTATGGGTGTACTTTCAGATTAGAC
LTR/ERV1	ALTR39_BT	GAAAATATTCCCTCTTGTTGCTTCTTGCCATATCTAGAGTTA
LTR/ERV1	ALTR39_BT	GAAAATATTCCCTCTTGTTGCTTCTTCCCATATCTAGAGTTA
LTR/ERV1	ALTR39_BT	CTTGGAGTATAGACACTGAATTGGAAGTATTTCTGAGTTCCA
LTR/ERV1	ALTR39_BT	CTTGGAACTCAGAAATACTTCCAATTCAGTGTCTATACTCCA
LTR/ERV1	ALTR39_BT	CTGAACACAAGATTCCTGGAGCACAGCTCTGTTGCCTCACCA
LTR/ERV1	ALTR39_BT	CTCTGTGGGGCTCTGGAGTACAGATCTGTTCTGTGTTCTCCA
LTR/ERV1	ALTR39_BT	CTCCCTGAAGTGCCAGGTCCAGACTGGGTTTCAGGCCTATTC
LTR/ERV1	ALTR39_BT	CTCCATTTCTTGTCTGTAGGATATAGGCTTCATTCAGCCTCC
LTR/ERV1	ALTR39_BT	CTATGGGTGTACTTTCAGATTAGACCTTGTATTGCTAAACAC
LTR/ERV1	ALTR39_BT	CTAGATATGGCAAGAAGCAACAAGAGGGAATATTTTCCTGGA
LTR/ERV1	ALTR39_BT	CTACTTCTAATTGGGTCTGTTACACCAAAATGGCAGACCAAG
LTR/ERV1	ALTR39_BT	CCTGAAGTGCCAGGTCCAGACTGGGTTTCAGGCCTATTCTTC
LTR/ERV1	ALTR39_BT	CCCTCTTGTTGCTTCTTGCCATATCTAGAGTTACACTGTTAC
LTR/ERV1	ALTR39_BT	CCATTTTGACAGGAAGTTATCACAGTCATAGTTGCCTAGTTC
LTR/ERV1	ALTR39_BT	CCAGTTATCACTCCTCCAACTACTTCTAATTGGGTCTGTTAC
LTR/ERV1	ALTR39_BT	CCAGGAAAATATTCCCTCTTGTTGCTTCTTGCCATATCTAGA
LTR/ERV1	ALTR39_BT	CAGGAAAATATTCCCTCTTGTTGCTTCTTGCCATATCTAGAG
LTR/ERV1	ALTR39_BT	CAGACTGAACACAAGATTCCTGGAGCACAGCTCTGTTGCCTC
LTR/ERV1	ALTR39_BT	CACCATGGGATAAAATGGTCATGAAATGCCCCCCTCAAAATC
LTR/ERV1	ALTR39_BT	CAAGGTCTAATCTGAAAGTACACCCATAGCATCACCTAGTTA
LTR/ERV1	ALTR39_BT	CAAGGAGGCTGAATGAAGCCTATATCCTACAGACAAGAAATG
LTR/ERV1	ALTR39_BT	CAACTACTTCTAATTGGGTCTGTTACACCAAAATGGCAGACC
LTR/ERV1	ALTR39_BT	CAAAGATTCTGTTGACAGGCCACTCAATGTGCTGTTACTGGA
LTR/ERV1	ALTR39_BT	ATTTCTTGTCTGTAGGATATAGGCTTCATTCAGCCTCCTTGA
LTR/ERV1	ALTR39_BT	ATTTCACCTGTTTTACAAAATTGCTGTTTCTTACACTGTCAA
LTR/ERV1	ALTR39_BT	ATGGGATAAAATGGTCATGAAATGCCCCCCTCAAAATCATGG
LTR/ERV1	ALTR39_BT	ATGGAGAACACAGAACAGATCTGTACTCCAGAGCCCCACAGA
LTR/ERV1	ALTR39_BT	ATGCCACCATTCTCAAAACAATGTCTGCTGGAAGCTAGTAAC
LTR/ERV1	ALTR39_BT	ATGATTTTGAGGGGGGCATTTCATGACCATTTTATCCCATGG
LTR/ERV1	ALTR39_BT	ATACAAGGTCTAATCTGAAAGTACACCCATAGCATCACCTAG
LTR/ERV1	ALTR39_BT	AGTCTCCCTGAAGTGCCAGGTCCAGACTGGGTTTCAGGCCTA
LTR/ERV1	ALTR39_BT	AGGTGATGCTATGGGTGTACTTTCAGATTAGACCTTGTATTG
LTR/ERV1	ALTR39_BT	AGGCTGAATGAAGCCTATATCCTACAGACAAGAAATGGAGAA
LTR/ERV1	ALTR39_BT	AGGCAACTATGACTGTGATAACTTCCTGTCAAAATGGGGCAT
LTR/ERV1	ALTR39_BT	AGGCAACAGAGCTGTGCTCCAGGAATCTTGTGTTCAGTCTGA
LTR/ERV1	ALTR39_BT	AGGAGGCTGAATGAAGCCTATATCCTACAGACAAGAAATGGA
LTR/ERV1	ALTR39_BT	AGCTTGGAGTATAGACACTGAATTGGAAGTATTTCTGAGTTC
LTR/ERV1	ALTR39_BT	AGCACCATGGGATAAAATGGTCATGAAATGCCCCCCTCAAAA
LTR/ERV1	ALTR39_BT	AGATGCAAGAATTGGGACTCATAAAATCTTCTCCTGAAAAGA
LTR/ERV1	ALTR39_BT	AGACTGAACACAAGATTCCTGGAGCACAGCTCTGTTGCCTCA
LTR/ERV1	ALTR39_BT	AGAATAGGCCTGAAACCCAGTCTGGACCTGGCACTTCAGGGA
LTR/ERV1	ALTR39_BT	AGAAGAATAGGCCTGAAACCCAGTCTGGACCTGGCACTTCAG
LTR/ERV1	ALTR39_BT	ACTTGGAACTCAGAAATACTTCCAATTCAGTGTCTATACTCC
LTR/ERV1	ALTR39_BT	ACTTGACCATGATTTTGAGGGGGGCATTTCATGACCATTTTA
LTR/ERV1	ALTR39_BT	ACTGGGTTTCAGGCCTATTCTTCTAAAAAGAAATGAGATTTA
LTR/ERV1	ALTR39_BT	ACTGAACACAAGATTCCTGGAGCACAGCTCTGTTGCCTCACC
LTR/ERV1	ALTR39_BT	ACTCTAGATATGGGAAGAAGCAACAAGAGGGAATATTTTCCT
LTR/ERV1	ALTR39_BT	ACTCTAGATATGGCAAGAAGCAACAAGAGGGAATATTTTCCT
LTR/ERV1	ALTR39_BT	ACTCATAAAATCTTCTCCTGAAAAGATCTAACTATCTGAAGG
LTR/ERV1	ALTR39_BT	ACTAGGTGATGCTATGGGTGTACTTTCAGATTAGACCTTGTA
LTR/ERV1	ALTR39_BT	ACTACTTCTAATTGGGTCTGTTACACCAAAATGGCAGACCAA
LTR/ERV1	ALTR39_BT	ACGACTCAGAAAACTCAAGTGTTTAGCAATACAAGGTCTAAT
LTR/ERV1	ALTR39_BT	ACCCAATTAGAAGTAGTTGGAGGAGTGATAACTGGAATTTAG
LTR/ERV1	ALTR39_BT	ACCATGGGATAAAATGGTCATGAAATGCCCCCCTCAAAATCA
LTR/ERV1	ALTR39_BT	ACCATGATTTTGAGGGGGGCATTTCATGACCATTTTATCCCA
LTR/ERV1	ALTR39_BT	ACAGACCCAATTAGAAGTAGTTGGAGGAGTGATAACTGGAAT
LTR/ERV1	ALTR39_BT	ACAAGATTCCTGGAGCACAGCTCTGTTGCCTCACCACCAACC
LTR/ERV1	ALTR39_BT	AATGGAGAACACAGAACAGATCTGTACTCCAGAGCCCCACAG
LTR/ERV1	ALTR39_BT	AATACAAGGTCTAATCTGAAAGTACACCCATAGCATCACCTA
LTR/ERV1	ALTR39_BT	AATAACTAGGTGATGCTATGGGTGTACTTTCAGATTAGACCT
LTR/ERV1	ALTR39_BT	AAGTCTCCCTGAAGTGCCAGGTCCAGACTGGGTTTCAGGCCT
LTR/ERV1	ALTR39_BT	AAGGTCTAATCTGAAAGTACACCCATAGCATCACCTAGTTAT
LTR/ERV1	ALTR39_BT	AAGGAGGCTGAATGAAGCCTATATCCTACAGACAAGAAATGG
LTR/ERV1	ALTR39_BT	AAGATGCAAGAATTGGGACTCATAAAATCTTCTCCTGAAAAG
LTR/ERV1	ALTR39_BT	AAGAATAGGCCTGAAACCCAGTCTGGACCTGGCACTTCAGGG
LTR/ERV1	ALTR39_BT	AACTTGGAACTCAGAAATACTTCCAATTCAGTGTCTATACTC
LTR/ERV1	ALTR39_BT	AACTCTAGATATGGGAAGAAGCAACAAGAGGGAATATTTTCC
LTR/ERV1	ALTR39_BT	AACTCTAGATATGGCAAGAAGCAACAAGAGGGAATATTTTCC
LTR/ERV1	ALTR39_BT	AACTAGGTGATGCTATGGGTGTACTTTCAGATTAGACCTTGT
LTR/ERV1	ALTR39_BT	AACTACTTCTAATTGGGTCTGTTACACCAAAATGGCAGACCA
LTR/ERV1	ALTR39_BT	AACAGACCCAATTAGAAGTAGTTGGAGGAGTGATAACTGGAA
LTR/ERV1	ALTR39_BT	AAATTCCAGTTATCACTCCTCCAACTACTTCTAATTGGGTCT
LTR/ERV1	ALTR39_BT	AAATGGAGAACACAGAACAGATCTGTACTCCAGAGCCCCACA
LTR/ERV1	ALTR39_BT	AAATCTCATTTCTTTTTAGAAGAATAGGCCTGAAACCCAGTC
LTR/ERV1	ALTR39_BT	AAATATTCCCTCTTGTTGCTTCTTGCCATATCTAGAGTTACA
LTR/ERV1	ALTR39_BT	AAATATTCCCTCTTGTTGCTTCTTCCCATATCTAGAGTTACA
LTR/ERV1	ALTR39_BT	AAATAACTAGGTGATGCTATGGGTGTACTTTCAGATTAGACC
LTR/ERV1	ALTR39_BT	AAACTTGACCATGATTTTGAGGGGGGCATTTCATGACCATTT
LTR/ERV1	ALTR39_BT	AAAATGGTCATGAAATGCCCCCCTCAAAATCATGGTCAAGTT
LTR/ERV1	ALTR39_BT	AAAATATTCCCTCTTGTTGCTTCTTGCCATATCTAGAGTTAC
LTR/ERV1	ALTR39_BT	AAAATATTCCCTCTTGTTGCTTCTTCCCATATCTAGAGTTAC
LTR/ERV1	ALTR39_BT	TTCTGAGTTCCAAGTTCTAGATCTGAGTCTTGTATGATTAAA
LTR/ERV1	ALTR39_BT	TGTCTACTAAATTCCAGTTATCACTCCTCCAACTACTTCTAA
LTR/ERV1	ALTR39_BT	TGAAATGCCCCCCTCAAAATCATGGTCAAGTTTATGAGCAAA
LTR/ERV1	ALTR39_BT	TCTGAGTTCCAAGTTCTAGATCTGAGTCTTGTATGATTAAAA
LTR/ERV1	ALTR39_BT	TCAAAATGGGGCATAGGACTGCCCCAGCTTGGAGTATAGACA
LTR/ERV1	ALTR39_BT	TATGGGACTATATATTATTCTATTAGAGGCCTCACACACATA
LTR/ERV1	ALTR39_BT	TAGGCAACTATGACTGTGATAACTTCCTGTCAAAATGGGGCA
LTR/ERV1	ALTR39_BT	TAGAAGTAGTTGGAGGAGTGATAACTGGAATTTAGTAGACAA
LTR/ERV1	ALTR39_BT	GTGGTGAGGCAACAGAGCTGTGCTCCAGGAATCTTGTGTTCA
LTR/ERV1	ALTR39_BT	GTGGATTCAAACAATTGCTAATCAGGGAAGGGAGGGGATACA
LTR/ERV1	ALTR39_BT	GTCAAGGAGGCTGAATGAAGCCTATATCCTACAGACAAGAAA
LTR/ERV1	ALTR39_BT	GGTCAAGGAGGCTGAATGAAGCCTATATCCTACAGACAAGAA
LTR/ERV1	ALTR39_BT	GGGAAGGTCAAGGAGGCTGAATGAAGCCTATATCCTACAGAC
LTR/ERV1	ALTR39_BT	GGACTCATAAAATCTTCTCCTGAAAAGATCTAACTATCTGAA
LTR/ERV1	ALTR39_BT	GGAAGGTCAAGGAGGCTGAATGAAGCCTATATCCTACAGACA
LTR/ERV1	ALTR39_BT	GATGGTAACTTCAGACTGAACACAAGATTCCTGGAGCACAGC
LTR/ERV1	ALTR39_BT	GAGCTGTGCTCCAGGAATCTTGTGTTCAGTCTGAAGTTACCA
LTR/ERV1	ALTR39_BT	GACAAAATAAATCTCATTTCTTTTTAGAAGAATAGGCCTGAA
LTR/ERV1	ALTR39_BT	GAAGTAGTTGGAGGAGTGATAACTGGAATTTAGTAGACAAAA
LTR/ERV1	ALTR39_BT	GAAGGTCAAGGAGGCTGAATGAAGCCTATATCCTACAGACAA
LTR/ERV1	ALTR39_BT	GAACACAAGATTCCTGGAGCACAGCTCTGTTGCCTCACCACC
LTR/ERV1	ALTR39_BT	GAAATGGAGAACACAGAACAGATCTGTACTCCAGAGCCCCAC
LTR/ERV1	ALTR39_BT	GAAATGCCCCCCTCAAAATCATGGTCAAGTTTATGAGCAAAA
LTR/ERV1	ALTR39_BT	CTTCTAATTGGGTCTGTTACACCAAAATGGCAGACCAAGGGA
LTR/ERV1	ALTR39_BT	CTTCAGATAGTTAGATCTTTTCAGGAGAAGATTTTATGAGTC
LTR/ERV1	ALTR39_BT	CTAGGCAACTATGACTGTGATAACTTCCTGTCAAAATGGGGC
LTR/ERV1	ALTR39_BT	CTAGATATGGGAAGAAGCAACAAGAGGGAATATTTTCCTGGA
LTR/ERV1	ALTR39_BT	CCAGGAAAATATTCCCTCTTGTTGCTTCTTCCCATATCTAGA
LTR/ERV1	ALTR39_BT	CATATGAGATCGATGATGGTAACAGTGTAACTCTAGATATGG
LTR/ERV1	ALTR39_BT	CATAAACTTGACCATGATTTTGAGGGGGGCATTTCATGACCA
LTR/ERV1	ALTR39_BT	CAGGCCTATTCTTCTAAAAAGAAATGAGATTTATTTTGTCTA
LTR/ERV1	ALTR39_BT	CAGGAAAATATTCCCTCTTGTTGCTTCTTCCCATATCTAGAG
LTR/ERV1	ALTR39_BT	CAGCAGACATTGTTTTGAGAATGGTGGCATCCAAGCCTGACA
LTR/ERV1	ALTR39_BT	CAGAGCTGTGCTCCAGGAATCTTGTGTTCAGTCTGAAGTTAC
LTR/ERV1	ALTR39_BT	CACGACTCAGAAAACTCAAGTGTTTAGCAATACAAGGTCTAA
LTR/ERV1	ALTR39_BT	CAAAATGGGGCATAGGACTGCCCCAGCTTGGAGTATAGACAC
LTR/ERV1	ALTR39_BT	CAAAATAAATCTCATTTCTTTTTAGAAGAATAGGCCTGAAAC
LTR/ERV1	ALTR39_BT	ATGTCTGCTGGAAGCTAGTAACCTTACTTTTTATAAAACTAG
LTR/ERV1	ALTR39_BT	ATGCAAGAATTGGGACTCATAAAATCTTCTCCTGAAAAGATC
LTR/ERV1	ALTR39_BT	ATCTTTTCAGGAGAAGATTTTATGAGTCCCAATTCTTGCATC
LTR/ERV1	ALTR39_BT	ATCCCTTGGTCTGCCATTTTGGTGTAACAGACCCAATTAGAA
LTR/ERV1	ALTR39_BT	ATATGGGACTATATATTATTCTATTAGAGGCCTCACACACAT
LTR/ERV1	ALTR39_BT	ATAGACACTGAATTGGAAGTATTTCTGAGTTCCAAGTTCTAG
LTR/ERV1	ALTR39_BT	ATAAATCTCATTTCTTTTTAGAAGAATAGGCCTGAAACCCAG
LTR/ERV1	ALTR39_BT	ATAAACTTGACCATGATTTTGAGGGGGGCATTTCATGACCAT
LTR/ERV1	ALTR39_BT	AGTTACTAGCTTCCAGCAGACATTGTTTTGAGAATGGTGGCA
LTR/ERV1	ALTR39_BT	AGGTCAAGGAGGCTGAATGAAGCCTATATCCTACAGACAAGA
LTR/ERV1	ALTR39_BT	AGCTGTGCTCCAGGAATCTTGTGTTCAGTCTGAAGTTACCAT
LTR/ERV1	ALTR39_BT	AGCCCCTTTTTGCTCATAAACTTGACCATGATTTTGAGGGGG
LTR/ERV1	ALTR39_BT	AGAGTCCTGGTTCCTACTCAAAGAAATATGCATAACAATGTC
LTR/ERV1	ALTR39_BT	AGAGCTGTGCTCCAGGAATCTTGTGTTCAGTCTGAAGTTACC
LTR/ERV1	ALTR39_BT	AGACATTGTTATGCATATTTCTTTGAGTAGGAACCAGGACTC
LTR/ERV1	ALTR39_BT	AGACAAAATAAATCTCATTTCTTTTTAGAAGAATAGGCCTGA
LTR/ERV1	ALTR39_BT	AGAAGTAGTTGGAGGAGTGATAACTGGAATTTAGTAGACAAA
LTR/ERV1	ALTR39_BT	AGAACACAGAACAGATCTGTACTCCAGAGCCCCACAGAGTCC
LTR/ERV1	ALTR39_BT	ACTTCTAATTGGGTCTGTTACACCAAAATGGCAGACCAAGGG
LTR/ERV1	ALTR39_BT	ACTTCAGACTGAACACAAGATTCCTGGAGCACAGCTCTGTTG
LTR/ERV1	ALTR39_BT	ACTAGGCAACTATGACTGTGATAACTTCCTGTCAAAATGGGG
LTR/ERV1	ALTR39_BT	ACATTGTTATGCATATTTCTTTGAGTAGGAACCAGGACTCTG
LTR/ERV1	ALTR39_BT	ACAGAGCTGTGCTCCAGGAATCTTGTGTTCAGTCTGAAGTTA
LTR/ERV1	ALTR39_BT	ACACAAGATTCCTGGAGCACAGCTCTGTTGCCTCACCACCAA
LTR/ERV1	ALTR39_BT	ACAAAATAAATCTCATTTCTTTTTAGAAGAATAGGCCTGAAA
LTR/ERV1	ALTR39_BT	AATAAATCTCATTTCTTTTTAGAAGAATAGGCCTGAAACCCA
LTR/ERV1	ALTR39_BT	AAGTAGTTGGAGGAGTGATAACTGGAATTTAGTAGACAAAAT
LTR/ERV1	ALTR39_BT	AAGGTCAAGGAGGCTGAATGAAGCCTATATCCTACAGACAAG
LTR/ERV1	ALTR39_BT	AAGATTTTATGAGTCCCAATTCTTGCATCTTCTCATACCTAG
LTR/ERV1	ALTR39_BT	AAGACATTGTTATGCATATTTCTTTGAGTAGGAACCAGGACT
LTR/ERV1	ALTR39_BT	AACTAGGCAACTATGACTGTGATAACTTCCTGTCAAAATGGG
LTR/ERV1	ALTR39_BT	AACAGAGCTGTGCTCCAGGAATCTTGTGTTCAGTCTGAAGTT
LTR/ERV1	ALTR39_BT	AACACAAGATTCCTGGAGCACAGCTCTGTTGCCTCACCACCA
LTR/ERV1	ALTR39_BT	AAATAAATCTCATTTCTTTTTAGAAGAATAGGCCTGAAACCC
LTR/ERV1	ALTR39_BT	AAAGATTCTGTTGACAGGCCACTCAATGTGCTGTTACTGGAC
LTR/ERV1	ALTR39_BT	AAAATGGGGCATAGGACTGCCCCAGCTTGGAGTATAGACACT
LTR/ERV1	ALTR39_BT	AAAATAAATCTCATTTCTTTTTAGAAGAATAGGCCTGAAACC
LTR/ERV1	ALTR39_BT	TTCTCTGGACCACCTGTCTTACTAGCCTCTTGGTCCAGGAAA
LTR/ERV1	ALTR39_BT	TTAATCATACAAGACTCAGATCTAGAACTTGGAACTCAGAAA
LTR/ERV1	ALTR39_BT	TGTTTTGAGAATGGTGGCATCCAAGCCTGACACGACTCAGAA
LTR/ERV1	ALTR39_BT	TGTAAACTTTTCCTTAATAGCCAAAGCAGATTTCACCGTTAA
LTR/ERV1	ALTR39_BT	TCTTGCATCTTCTCATACCTAGAGAAACACTGACATCATTAA
LTR/ERV1	ALTR39_BT	TCTCTGGACCACCTGTCTTACTAGCCTCTTGGTCCAGGAAAA
LTR/ERV1	ALTR39_BT	TCTATACTCCAAGCTGGGGCAGTCCTATGCCCCATTTTGACA
LTR/ERV1	ALTR39_BT	TCCAGACAGAGTCCTGGTTCCTACTCAAAGAAATATGCATAA
LTR/ERV1	ALTR39_BT	TCAGGGAAGGTCAAGGAGGCTGAATGAAGCCTATATCCTACA
LTR/ERV1	ALTR39_BT	TAGTTGGAGGAGTGATAACTGGAATTTAGTAGACAAAATAAA
LTR/ERV1	ALTR39_BT	TAGACACTGAATTGGAAGTATTTCTGAGTTCCAAGTTCTAGA
LTR/ERV1	ALTR39_BT	TACAGCCTCCAGACAGAGTCCTGGTTCCTACTCAAAGAAATA
LTR/ERV1	ALTR39_BT	TAATGATGTCAGTGTTTCTCTAGGTATGAGAAGATGCAAGAA
LTR/ERV1	ALTR39_BT	GTTTTGAGAATGGTGGCATCCAAGCCTGACACGACTCAGAAA
LTR/ERV1	ALTR39_BT	GTCCAGGAAAATATTCCCTCTTGTTGCTTCTTCCCATATCTA
LTR/ERV1	ALTR39_BT	GTCAAAATGGGGCATAGGACTGCCCCAGCTTGGAGTATAGAC
LTR/ERV1	ALTR39_BT	GTAGTTGGAGGAGTGATAACTGGAATTTAGTAGACAAAATAA
LTR/ERV1	ALTR39_BT	GGTGGGGGCTCAAAGACATTGTTATGCATATTTCTTTGAGTA
LTR/ERV1	ALTR39_BT	GGTGAAATCTGCTTTGGCTATTAAGGAAAAGTTTACAATTAA
LTR/ERV1	ALTR39_BT	GGTCATGAAATGCCCCCCTCAAAATCATGGTCAAGTTTATGA
LTR/ERV1	ALTR39_BT	GGGTGGATTCAAACAATTGCTAATCAGGGAAGGGAGGGGATA
LTR/ERV1	ALTR39_BT	GGCCTAGTCCAGTAACAGCACATTGAGTGGCCTGTCAACAGA
LTR/ERV1	ALTR39_BT	GGCAGAGCCCCTTTTTGCTCATAAACTTGACCATGATTTTGA
LTR/ERV1	ALTR39_BT	GCTCATAAACTTGACCATGATTTTGAGGGGGGCATTTCATGA
LTR/ERV1	ALTR39_BT	GCTCAAAGACATTGTTATGCATATTTCTTTGAGTAGGAACCA
LTR/ERV1	ALTR39_BT	GCCTCCAGACAGAGTCCTGGTTCCTACTCAAAGAAATATGCA
LTR/ERV1	ALTR39_BT	GCCTAGTCCAGTAACAGCACATTGAGTGGCCTGTCAACAGAA
LTR/ERV1	ALTR39_BT	GATTTTAATCATACAAGACTCAGATCTAGAACTTGGAACTCA
LTR/ERV1	ALTR39_BT	GATATGGCAAGAAGCAACAAGAGGGAATATTTTCCTGGACCA
LTR/ERV1	ALTR39_BT	GACACTGAATTGGAAGTATTTCTGAGTTCCAAGTTCTAGATC
LTR/ERV1	ALTR39_BT	GAAATATGCATAACAATGTCTTTGAGCCCCCACCCAGGTGGA
LTR/ERV1	ALTR39_BT	CTTGGTCCAGGAAAATATTCCCTCTTGTTGCTTCTTCCCATA
LTR/ERV1	ALTR39_BT	CTTCCCTGATTAGCAATTGTTTGAATCCACCCTTTGGAACTC
LTR/ERV1	ALTR39_BT	CTGTTGACAGGCCACTCAATGTGCTGTTACTGGACTAGGCCA
LTR/ERV1	ALTR39_BT	CTGGGTGGGGGCTCAAAGACATTGTTATGCATATTTCTTTGA
LTR/ERV1	ALTR39_BT	CTCCCTTCCCTGATTAGCAATTGTTTGAATCCACCCTTTGGA
LTR/ERV1	ALTR39_BT	CTCCAGACAGAGTCCTGGTTCCTACTCAAAGAAATATGCATA
LTR/ERV1	ALTR39_BT	CTCATAAACTTGACCATGATTTTGAGGGGGGCATTTCATGAC
LTR/ERV1	ALTR39_BT	CTCAGGGAAGGTCAAGGAGGCTGAATGAAGCCTATATCCTAC
LTR/ERV1	ALTR39_BT	CTCAGATCTAGAACTTGGAACTCAGAAATACTTCCAATTCAG
LTR/ERV1	ALTR39_BT	CTCAAAGAAATATGCATAACAATGTCTTTGAGCCCCCACCCA
LTR/ERV1	ALTR39_BT	CTCAAAATCATGGTCAAGTTTATGAGCAAAAAGGGGCTCTGC
LTR/ERV1	ALTR39_BT	CCTTGGTCTGCCATTTTGGTGTAACAGACCCAATTAGAAGTA
LTR/ERV1	ALTR39_BT	CCCTGAACTCCTTTCAGGGGCGTTGAAAGTCAGCAGTTGCAG
LTR/ERV1	ALTR39_BT	CCCCTCAAAATCATGGTCAAGTTTATGAGCAAAAAGGGGCTC
LTR/ERV1	ALTR39_BT	CCAGACAGAGTCCTGGTTCCTACTCAAAGAAATATGCATAAC
LTR/ERV1	ALTR39_BT	CCAATTCTTGCATCTTCTCATACCTAGAGAAACACTGACGTC
LTR/ERV1	ALTR39_BT	CCAAAGGGTGGATTCAAACAATTGCTAATCAGGGAAGGGAGG
LTR/ERV1	ALTR39_BT	CATTAACGGTGAAATCTGCTTTGGCTATTAAGGAAAAGTTTA
LTR/ERV1	ALTR39_BT	CATGAAATGCCCCCCTCAAAATCATGGTCAAGTTTATGAGCA
LTR/ERV1	ALTR39_BT	CAGGGAAGGTCAAGGAGGCTGAATGAAGCCTATATCCTACAG
LTR/ERV1	ALTR39_BT	CAGCCTCCAGACAGAGTCCTGGTTCCTACTCAAAGAAATATG
LTR/ERV1	ALTR39_BT	CAGAGCCCCTTTTTGCTCATAAACTTGACCATGATTTTGAGG
LTR/ERV1	ALTR39_BT	CAGACAGAGTCCTGGTTCCTACTCAAAGAAATATGCATAACA
LTR/ERV1	ALTR39_BT	CACTGAATTGGAAGTATTTCTGAGTTCCAAGTTCTAGATCTG
LTR/ERV1	ALTR39_BT	CACAAGATTCCTGGAGCACAGCTCTGTTGCCTCACCACCAAC
LTR/ERV1	ALTR39_BT	CAAAGGGTGGATTCAAACAATTGCTAATCAGGGAAGGGAGGG
LTR/ERV1	ALTR39_BT	CAAAGAAATATGCATAACAATGTCTTTGAGCCCCCACCCAGG
LTR/ERV1	ALTR39_BT	CAAAATTCTCTGGACCACCTGTCTTACTAGCCTCTTGGTCCA
LTR/ERV1	ALTR39_BT	CAAAATCATGGTCAAGTTTATGAGCAAAAAGGGGCTCTGCCA
LTR/ERV1	ALTR39_BT	CAAAACAATGTCTGCTGGAAGCTAGTAACCTTACTTTTTATA
LTR/ERV1	ALTR39_BT	ATTTTAATCATACAAGACTCAGATCTAGAACTTGGAACTCAG
LTR/ERV1	ALTR39_BT	ATTTCTGAGTTCCAAGTTCTAGATCTGAGTCTTGTATGATTA
LTR/ERV1	ALTR39_BT	ATTGTTATGCATATTTCTTTGAGTAGGAACCAGGACTCTGTC
LTR/ERV1	ALTR39_BT	ATTCTCTGGACCACCTGTCTTACTAGCCTCTTGGTCCAGGAA
LTR/ERV1	ALTR39_BT	ATTCAGTGTCTATACTCCAAGCTGGGGCAGTCCTATGCCCCA
LTR/ERV1	ALTR39_BT	ATTAGAAGTAGTTGGAGGAGTGATAACTGGAATTTAGTAGAC
LTR/ERV1	ALTR39_BT	ATTAACGGTGAAATCTGCTTTGGCTATTAAGGAAAAGTTTAC
LTR/ERV1	ALTR39_BT	ATGGGGCATAGGACTGCCCCAGCTTGGAGTATAGACACTGAA
LTR/ERV1	ALTR39_BT	ATGGGAAGAAGCAACAAGAGGGAATATTTTCCTGGACCAAGA
LTR/ERV1	ALTR39_BT	ATGCATATTTCTTTGAGTAGGAACCAGGACTCTGTCTGGAGG
LTR/ERV1	ALTR39_BT	ATGAAATGCCCCCCTCAAAATCATGGTCAAGTTTATGAGCAA
LTR/ERV1	ALTR39_BT	ATCATACAAGACTCAGATCTAGAACTTGGAACTCAGAAATAC
LTR/ERV1	ALTR39_BT	ATATGGGAAGAAGCAACAAGAGGGAATATTTTCCTGGACCAA
LTR/ERV1	ALTR39_BT	ATATGGCAAGAAGCAACAAGAGGGAATATTTTCCTGGACCAA
LTR/ERV1	ALTR39_BT	ATAGGCTTCATTCAGCCTCCTTGACCTTCCCTGAGTTCCAAA
LTR/ERV1	ALTR39_BT	ATAAAAAGTAAGGTTACTAGCTTCCAGCAGACATTGTTTTGA
LTR/ERV1	ALTR39_BT	AGTTTTATAAAAAGTAAGGTTACTAGCTTCCAGCAGACATTG
LTR/ERV1	ALTR39_BT	AGTATTTCTGAGTTCCAAGTTCTAGATCTGAGTCTTGTATGA
LTR/ERV1	ALTR39_BT	AGTAGTTGGAGGAGTGATAACTGGAATTTAGTAGACAAAATA
LTR/ERV1	ALTR39_BT	AGGGTGGATTCAAACAATTGCTAATCAGGGAAGGGAGGGGAT
LTR/ERV1	ALTR39_BT	AGCCTCCAGACAGAGTCCTGGTTCCTACTCAAAGAAATATGC
LTR/ERV1	ALTR39_BT	AGATATGGGAAGAAGCAACAAGAGGGAATATTTTCCTGGACC
LTR/ERV1	ALTR39_BT	AGATATGGCAAGAAGCAACAAGAGGGAATATTTTCCTGGACC
LTR/ERV1	ALTR39_BT	AGAGCCCCTTTTTGCTCATAAACTTGACCATGATTTTGAGGG
LTR/ERV1	ALTR39_BT	AGACAGAGTCCTGGTTCCTACTCAAAGAAATATGCATAACAA
LTR/ERV1	ALTR39_BT	AGACACTGAATTGGAAGTATTTCTGAGTTCCAAGTTCTAGAT
LTR/ERV1	ALTR39_BT	AGAAATATGCATAACAATGTCTTTGAGCCCCCACCCAGGTGG
LTR/ERV1	ALTR39_BT	ACTTCCTGTCAAAATGGGGCATAGGACTGCCCCAGCTTGGAG
LTR/ERV1	ALTR39_BT	ACTGAATTGGAAGTATTTCTGAGTTCCAAGTTCTAGATCTGA
LTR/ERV1	ALTR39_BT	ACTCAAAGAAATATGCATAACAATGTCTTTGAGCCCCCACCC
LTR/ERV1	ALTR39_BT	ACCCTGAACTCCTTTCAGGGGCGTTGAAAGTCAGCAGTTGCA
LTR/ERV1	ALTR39_BT	ACAGCCTCCAGACAGAGTCCTGGTTCCTACTCAAAGAAATAT
LTR/ERV1	ALTR39_BT	ACAGAGTCCTGGTTCCTACTCAAAGAAATATGCATAACAATG
LTR/ERV1	ALTR39_BT	ACACTGAATTGGAAGTATTTCTGAGTTCCAAGTTCTAGATCT
LTR/ERV1	ALTR39_BT	ACAATGTCTGCTGGAAGCTAGTAACCTTACTTTTTATAAAAC
LTR/ERV1	ALTR39_BT	ACAAGACTCAGATCTAGAACTTGGAACTCAGAAATACTTCCA
LTR/ERV1	ALTR39_BT	AATTCTCTGGACCACCTGTCTTACTAGCCTCTTGGTCCAGGA
LTR/ERV1	ALTR39_BT	AATTAGAAGTAGTTGGAGGAGTGATAACTGGAATTTAGTAGA
LTR/ERV1	ALTR39_BT	AATGTCTGCTGGAAGCTAGTAACCTTACTTTTTATAAAACTA
LTR/ERV1	ALTR39_BT	AATGGTCATGAAATGCCCCCCTCAAAATCATGGTCAAGTTTA
LTR/ERV1	ALTR39_BT	AATGGGGCATAGGACTGCCCCAGCTTGGAGTATAGACACTGA
LTR/ERV1	ALTR39_BT	AATCCCTTGGTCTGCCATTTTGGTGTAACAGACCCAATTAGA
LTR/ERV1	ALTR39_BT	AATCATACAAGACTCAGATCTAGAACTTGGAACTCAGAAATA
LTR/ERV1	ALTR39_BT	AAGTATTTCTGAGTTCCAAGTTCTAGATCTGAGTCTTGTATG
LTR/ERV1	ALTR39_BT	AAGGTTGGTACAGCCTCCAGACAGAGTCCTGGTTCCTACTCA
LTR/ERV1	ALTR39_BT	AAGGGTGGATTCAAACAATTGCTAATCAGGGAAGGGAGGGGA
LTR/ERV1	ALTR39_BT	AAGATTCTGTTGACAGGCCACTCAATGTGCTGTTACTGGACT
LTR/ERV1	ALTR39_BT	AACTTCCTGTCAAAATGGGGCATAGGACTGCCCCAGCTTGGA
LTR/ERV1	ALTR39_BT	AACCCAGTCTGGACCTGGCACTTCAGGGAGACTTGTAGCCAG
LTR/ERV1	ALTR39_BT	AACAATGTCTGCTGGAAGCTAGTAACCTTACTTTTTATAAAA
LTR/ERV1	ALTR39_BT	AAATTCTCTGGACCACCTGTCTTACTAGCCTCTTGGTCCAGG
LTR/ERV1	ALTR39_BT	AAATGGGGCATAGGACTGCCCCAGCTTGGAGTATAGACACTG
LTR/ERV1	ALTR39_BT	AAATCTTTGCCAAACCTGAGAATGGACATTCTCAGCACCATG
LTR/ERV1	ALTR39_BT	AAATCATGGTCAAGTTTATGAGCAAAAAGGGGCTCTGCCAAC
LTR/ERV1	ALTR39_BT	AAAGGTTGGTACAGCCTCCAGACAGAGTCCTGGTTCCTACTC
LTR/ERV1	ALTR39_BT	AAAGGGTGGATTCAAACAATTGCTAATCAGGGAAGGGAGGGG
LTR/ERV1	ALTR39_BT	AAAGAAATATGCATAACAATGTCTTTGAGCCCCCACCCAGGT
LTR/ERV1	ALTR39_BT	AAACTTTTCCTTAATAGCCAAAGCAGATTTCACCGTTAATGA
LTR/ERV1	ALTR39_BT	AAACAATGTCTGCTGGAAGCTAGTAACCTTACTTTTTATAAA
LTR/ERV1	ALTR39_BT	AAAATTCTCTGGACCACCTGTCTTACTAGCCTCTTGGTCCAG
LTR/ERV1	ALTR39_BT	AAAATCTTTGCCAAACCTGAGAATGGACATTCTCAGCACCAT
LTR/ERV1	ALTR39_BT	AAAATCATGGTCAAGTTTATGAGCAAAAAGGGGCTCTGCCAA
LTR/ERV1	ALTR39_BT	AAAACAATGTCTGCTGGAAGCTAGTAACCTTACTTTTTATAA
LTR/ERV1	ALTR39_BT	TTTTCTGAGTCGTGTCAGGCTTGGATGCCACCATTTTCAAAA
LTR/ERV1	ALTR39_BT	TTTTCTGAGTCGTGTCAGGCTTGGATGCCACCATTCTCAAAA
LTR/ERV1	ALTR39_BT	TGGTACAGCCTCCAGACAGAGTCCTGGTTCCTACTCAAAGAA
LTR/ERV1	ALTR39_BT	TCTTTGAGTAGGAACCAGGACTCTGTCTGGAGGCTGTACCAA
LTR/ERV1	ALTR39_BT	TCTTGCATCTTCTCATACCTAGAGAAACACTGACGTCATTAA
LTR/ERV1	ALTR39_BT	TCCCTTCCCTGATTAGCAATTGTTTGAATCCACCCTTTGGAA
LTR/ERV1	ALTR39_BT	TCAGGCTTGGATGCCACCATTTTCAAAACAATGTCTGCTGGA
LTR/ERV1	ALTR39_BT	TCAGGCTTGGATGCCACCATTCTCAAAACAATGTCTGCTGGA
LTR/ERV1	ALTR39_BT	TATGAGATCGATGATGGTAACAGTGTAACTCTAGATATGGCA
LTR/ERV1	ALTR39_BT	TATAGGCTTCATTCAGCCTCCTTGACCTTCCCTGAGTTCCAA
LTR/ERV1	ALTR39_BT	TAGGCAACTGGCTACCTGGCTACAAGTCTCCCTGAAGTGCCA
LTR/ERV1	ALTR39_BT	TAGAACTTGGAACTCAGAAATACTTCCAATTCAGTGTCTATA
LTR/ERV1	ALTR39_BT	TAATGACGTCAGTGTTTCTCTAGGTATGAGAAGATGCAAGAA
LTR/ERV1	ALTR39_BT	GTTTTGAAAATGGTGGCATCCAAGCCTGACACGACTCAGAAA
LTR/ERV1	ALTR39_BT	GTTTTCTGAGTCGTGTCAGGCTTGGATGCCACCATTTTCAAA
LTR/ERV1	ALTR39_BT	GTTTTCTGAGTCGTGTCAGGCTTGGATGCCACCATTCTCAAA
LTR/ERV1	ALTR39_BT	GTAACAGCACATTGAGTGGCCTGTCAACAGAATCTTTGCCAA
LTR/ERV1	ALTR39_BT	GGTGGATTCAAACAATTGCTAATCAGGGAAGGGAGGGGATAC
LTR/ERV1	ALTR39_BT	GGTACAGCCTCCAGACAGAGTCCTGGTTCCTACTCAAAGAAA
LTR/ERV1	ALTR39_BT	GGGGGCTCAAAGACATTGTTATGCATATTTCTTTGAGTAGGA
[truncated: 65,295 more rows]
