# Supplementary material
Source: HighWire-hosted journal article supplement (doi:10.1101/gr.281289.125)
Supplement: Supplemental_Table_S5.xlsx [file Supplemental_Table_S5.xlsx]

## Sheet: Table S5
Table S5: Summary of TE k‑mer clusters and their taxonomic distribution patterns.
Clusters	Count	Classification
C1	13407	Pan-conserved
C2	2462	Bovinae-specific
C3	2400	Bovidae-shared (excluding Bovinae)
C4	2238	Pan-conserved
C5	2217	Bovidae-shared
C6	1852	Pan-conserved
C7	1310	Pan-conserved
C8	857	Bovidae-shared (excluding Bovinae)
C9	853	Pan-conserved
C10	745	Pan-conserved
C11	676	Pan-conserved
C12	674	Capridae-specific
C13	641	Bovidae-shared (excluding Bovinae)
C14	535	Bovidae-shared (excluding Bovinae)
C15	529	Capridae-specific
C16	519	Pan-conserved
C17	493	Cervidae-specific
C18	467	Bovidae-shared (excluding Bovinae)
C19	464	Pan-conserved
C20	461	Pan-conserved
C21	457	Capridae-specific
C22	357	Bovidae-shared
C23	284	Pan-conserved
C24	242	Bovidae-shared (excluding Bovinae)
C25	226	Bovidae-shared (excluding Capridae)
C27	223	Bovidae-shared
C26	223	Bovidae-shared
C28	222	Pan-conserved
C29	212	Bovidae-shared (excluding Bovinae)
C30	199	Bovidae-shared
C31	198	Bovidae-shared
C32	180	Bovidae-shared
C33	169	Pan-conserved
C34	163	Bovidae-shared
C35	153	Bovidae-shared
C36	143	Pan-conserved
C37	139	Bovidae-shared
C38	133	Bovidae-shared
C39	129	Bovidae-shared
C40	126	Pan-conserved
C41	123	Pan-conserved
C42	112	Pan-conserved
C43	95	Bovidae-shared
C44	81	Bovidae-shared
C45	62	Capridae-specific
