# Supplementary material
Source: HighWire-hosted journal article supplement (doi:10.1101/gr.281289.125)
Supplement: Supplemental_Table_S6.xlsx [file Supplemental_Table_S6.xlsx]

## Sheet: Table S6
Table S6: Association details between TE k‑mer clusters and predicted KZFP binding motifs.
Source	KZFP	TE class	Family	Subfamily	R2	Motif sequence	p-value
JASPAR	ZNF484	C17	LTR/ERV1	ERV1-2C-LTR_BT	0.992259	CAGGGACAGAGAAACATA	2.4e-07
JASPAR	ZNF565	C8	LTR/ERVL-MaLR	MLT1F1	0.638224	GCCATCTTGGAAGGAAATCCACCA	2.65e-07
JASPAR	ZFP28	C2	LTR/ERVK	ERV2-2B_BT-I	0.627463	GGAATTTTACTTCTTTTTGT	4.65e-06
JASPAR	ZNF182	C2	LTR/ERV1	ERV1-1B-LTR_BT	0.911884	AAAGAAAAAAAG	6.8e-06
JASPAR	ZNF789	C1	SINE/tRNA-Core-RTE	Bov-tA1	0.673878	TTACCACTAGTGCCACCT	1.05e-05
JASPAR	ZNF10	C5	LTR/ERVK	BTLTR1	0.698255	GCCTCCTTCCTCATGACCTTT	1.61e-05
JASPAR	ZSCAN20	C3	LTR/ERVK	BTLTR1B	0.687853	TCTTTCCAGAAAC	1.76e-05
JASPAR	ZSCAN20	C18	LTR/ERVK	BTLTR1B	0.635261	TCTTTCCAGAAAC	1.76e-05
JASPAR	ZSCAN20	C8	LTR/ERVK	BTLTR1B	0.631894	TCTTTCCAGAAAC	1.76e-05
JASPAR	ZNF783	C22	LTR/ERVK	LTR2_BT	0.603758	CTGCGGCCTAT	1.84e-05
JASPAR	ZFP69	C15	LTR/ERVK	BTLTR1B1	0.706428	GAGGCTGTAAACAAT	2.23e-05
JASPAR	ZNF554	C15	SINE/tRNA	CHR-2B	0.609807	GTGCAGAGCAC	2.41e-05
JASPAR	ZNF483	C13	LTR/ERVK	BTLTR1B1	0.655575	GTGCAGCTCCAAG	3.22e-05
JASPAR	ZNF7	C27	LTR/ERV1	ALTR39_BT	0.734549	TAAACACTTGA	3.42e-05
JASPAR	ZNF554	C12	LTR/ERVK	ERV2-1B-LTR_BT	0.654363	AAGCAGAGCAC	4.25e-05
JASPAR	ZNF182	C30	LINE/L1	L1MEg	0.647174	AAAAACAAATAA	4.87e-05
JASPAR	ZNF483	C3	LTR/ERVK	BTLTR1B1	0.602529	CTTGCAGCTCCAGTT	5.16e-05
JASPAR	ZNF565	C3	LTR/ERV1	ALTR39_BT	0.686994	CCCATTTTGACAGGAAGTTATCAC	7.13e-05
JASPAR	ZNF7	C14	LTR/ERVK	BTLTR1F	0.615375	AAAACACTTCA	7.32e-05
JASPAR	ZNF484	C41	LTR/ERV1	ERV1-2C-LTR_BT	0.63414	AAAGAACCGAGGAGCATA	9.19e-05
JASPAR	ZFP28	C30	SINE/MIR	MIR	0.707501	AGGTCTCATTTTCTTCACTT	0.000173
JASPAR	ZNF10	C39	LTR/ERV1	LTR10B_BT	0.608257	GAGTCAAAACTCACAGGATAA	0.000224
JASPAR	ZNF597	C21	LTR/ERVK	BTLTR1D2	0.786857	AAGGCTATCTTG	0.000267
JASPAR	ZNF10	C26	LTR/ERVK	BTLTR1D2	0.615434	AATTCCAGACTTACAAAACAT	0.000276
JASPAR	ZNF783	C7	LTR/ERV1	ALTR2C_BT	0.626469	CTGCAGCCTGG	0.000362
JASPAR	ZNF597	C45	LTR/ERV1	ERV1-3-I_BT	0.619274	TGCGCCAGCTTA	0.000373
JASPAR	ZNF597	C12	SINE/tRNA	SINE2-1_BT	0.69377	TTGGCCATGCTG	0.00038
JASPAR	ZNF565	C15	LTR/ERVK	ERV2-1C-LTR_BT	0.732018	TTCATTAAGGAAGAGAGCCAAAAA	0.000442
JASPAR	ZNF786	C21	LTR/ERVK	ERV2-1C-LTR_BT	0.694252	AAACCAGGCCG	0.000511
JASPAR	ZNF565	C13	LTR/ERVK	ERV2-1B-LTR_BT	0.813926	CTCCTGACCGCAGGAGGCACAGGA	0.000609
JASPAR	ZNF10	C43	LINE/L1	L1ME3Cz	0.612778	CACCCTTTTCTCCCTGCAGAG	0.000674
JASPAR	ZNF394	C32	LINE/L1	L1ME3A	0.606845	CCTCCTCC	0.000705
Predict	LOC108638027	C3	LTR/ERV1	ALTR39_BT	0.761922	TTGTTGCTTCTTGCCATATCTAGAGTTA	1.77e-06
Predict	LOC100847773	C2	LTR/ERVK	ERV2-1-LTR_BT	0.791745	GGATACAATTCAGGGGATGTGAAAACTT	1.37e-05
Predict	ZSCAN4	C12	LTR/ERVK	BTLTR1B1	0.619808	GCAAATTCTTTTG	1.63e-05
Predict	LOC100140412	C2	LTR/ERVK	ERV2-1-I_BT	0.760523	CATATTTCATTTG	1.83e-05
Predict	ZNF746	C12	LINE/L1	L1M5	0.83201	TGGGGAGGGA	2.3e-05
Predict	LOC102180074	C32	LTR/ERV1	LTR1_BT	0.653765	GCACAGTCAGCTC	2.76e-05
Predict	LOC102179040	C12	LTR/ERV1	MER52-int	0.775883	GGTGGTCAGACCCCTGTGCAGCTGACAT	3.14e-05
Predict	LOC100296121	C13	LTR/ERVK	ERV2-1B-LTR_BT	0.68173	ACCCTTCGAATTCCCTGGATCCACCGGG	3.19e-05
Predict	LOC100296121	C15	LTR/ERVK	ERV2-1B-LTR_BT	0.635562	ACCCTTCGAATTCCCTGGATCCACCGGG	3.19e-05
Predict	LOC787554	C5	LTR/ERV1	ALTR39_BT	0.617664	GTGTGTGAGGCCT	3.32e-05
Predict	LOC102180074	C15	LTR/ERVK	BTLTR1B1	0.619237	GCAAATTCTTTTG	4.41e-05
Predict	ZNF792	C2	LTR/ERVK	BTLTR1	0.901534	ACACTGCCAGGGACACAGCAGGTAAGGG	4.6e-05
Predict	ZNF782	C13	LTR/ERVK	BTLTR1B	0.608081	CCACCCTCCAAATAAAGTTGCATTCCTATAGGGT	5.03e-05
Predict	LOC102172294	C3	LTR/ERVK	BTLTR1F	0.774129	TGCTGTAACCCACTGAATCTTTGCTCCA	5.18e-05
Predict	LOC102172294	C18	LTR/ERVK	BTLTR1F	0.638295	TGCTGTAACCCACTGAATCTTTGCTCCA	5.18e-05
Predict	ZNF496	C28	SINE/tRNA	CHRL1_BT	0.611995	GCAGGGG	7.21e-05
Predict	LOC102189337	C26	LTR/ERV1	ERV1-2C-LTR_BT	0.61321	AATAGAACAAAAGAAGGTCCGAGGACCGGAG	7.44e-05
Predict	ZNF777	C30	LTR/ERV1	MER31-int	0.616966	GGTAGATGGGGCAAGT	8.01e-05
Predict	ZNF746	C21	LTR/ERVL-MaLR	MLT1F	0.91366	AGGGGTGGGA	8.06e-05
Predict	LOC102189337	C35	LTR/ERVL-MaLR	MLT1J	0.626721	GTTAGACCAGAGGTAAGTAGCACAGGTGGAA	8.47e-05
Predict	ZSCAN4	C32	LTR/ERV1	LTR1_BT	0.615106	GCACAGTCAGCTC	8.97e-05
Predict	LOC102186683	C12	LTR/ERVK	ERV2-1B-LTR_BT	0.708139	GTAGTAAGAA	9.12e-05
Predict	LOC102186683	C15	LTR/ERVK	ERV2-1B-LTR_BT	0.70612	GTAGTAAGAA	9.12e-05
Predict	ZNF630	C12	LTR/ERVK	ERV2-1B-LTR_BT	0.617881	GTAGTAAGAA	9.12e-05
Predict	ZNF568	C11	LTR/ERV1	BtERVF2_I	0.614501	GGGGTGTTGTGTGGTGAATGGG	0.000101
Predict	LOC102180074	C45	LTR/ERV1	ERV1-3-I_BT	0.778713	TCAAATGCAGTTC	0.000105
Predict	LOC101902100	C30	SINE/tRNA	SINE2-1_BT	0.647174	TGGTTGG	0.000107
Predict	ZNF688	C6	LTR/ERV1	BtERVF2_I	0.999387	ATGGGTG	0.000107
Predict	ZNF688	C16	LTR/ERV1	BtERVF2_I	0.654034	ATGGGTG	0.000107
Predict	ZSCAN4	C45	LTR/ERV1	ERV1-3-I_BT	0.636028	CCAAATTCAAGTT	0.000113
Predict	LOC108638027	C5	LTR/ERVK	ERV2-1-I_BT	0.639786	TTGATGGGGAGAGCTATACTTAAACTCC	0.000118
Predict	LOC768229	C2	LTR/ERVK	ERV2-1-LTR_BT	0.669588	GTATACGATACATTTG	0.000124
Predict	LOC101111220	C31	LTR/ERVL	LTR10_EC	0.641986	GCCTGAACCCCAAGTACTGGAGCTT	0.000126
Predict	LOC616720	C2	LTR/ERVK	BTLTR1B	0.835383	ACCATGCTTACTAATTATGCCTGGGCTTCTAAGATCCGAC	0.000128
Predict	LOC108638027	C13	LTR/ERVK	BTLTR1C	0.65524	GCTCTGATGGCAAGGCTAATCAGACCTC	0.000129
Predict	LOC108638027	C18	LTR/ERVK	BTLTR1C	0.638249	GCTCTGATGGCAAGGCTAATCAGACCTC	0.000129
Predict	LOC101906717	C2	LTR/ERVK	ERV2-1-I_BT	0.715623	TGGATAC	0.00013
Predict	ZNF202	C28	LINE/L1	HAL1ME	0.733173	GGGGGGT	0.000131
Predict	ZSCAN26	C11	LTR/ERV1	BtERVF1_I	0.655538	ATAGGTGTTCTGC	0.000151
Predict	ZSCAN5B	C2	LTR/ERVK	ERV2-1-I_BT	0.724449	GCTGTTATTTCAGCTC	0.000157
Predict	LOC100296121	C5	LTR/ERVK	BTLTR1D2	0.600959	TTCACAAGAAGGAAGAGGGTACTTATCA	0.000158
Predict	LOC104968500	C2	LTR/ERVK	ERV2-1-I_BT	0.623132	GCACATCCTCGACCGC	0.000162
Predict	LOC102189337	C3	LINE/L1	L1MC	0.62299	TACAGTGTTGAATAGGCATGGTGAGAAGGGA	0.000163
Predict	ZNF792	C30	LTR/ERVK	BTLTR1	0.636786	ACAAAGGTCATGAGGAAGGAGGCTCGGC	0.00017
Predict	LOC789258	C2	LTR/ERVK	ERV2-1-I_BT	0.663345	GCTCCCCTTTACCCTATGGGGGAGG	0.00018
Predict	RBAK	C12	LTR/ERV1	MER52-int	0.663916	GTTTGGAGGCAAGTTGCTT	0.000188
Predict	LOC101902100	C2	LTR/ERVK	ERV2-1B-LTR_BT	0.911884	TGGTCGC	0.000195
Predict	LOC790201	C2	LTR/ERVK	ERV2-1-LTR_BT	0.838001	GTATACGATACATTTG	0.000196
Predict	ZSCAN4	C30	LTR/ERV1	MER31-int	0.699625	GCAAGTTGAGTTT	0.000196
Predict	LOC509810	C28	LTR/ERV1	ALTR39_BT	0.615005	CTGAGTCGTGTCAGGCTTG	0.000207
Predict	LOC101110170	C8	LTR/ERV1	LTR39_BT	0.666621	GATGCCTCAGAAAGGCTTTTGTAACTGGGAAGGTCTT	0.000209
Predict	LOC114117925	C9	LTR/ERV1	BtERVF2_I	0.608015	CGTATTGGAGGAGATGACT	0.000211
Predict	ZFP57	C11	LTR/ERV1	MER52-int	0.655538	GTTTGGG	0.000214
Predict	LOC108638027	C23	LTR/ERV1	ERV1-1-LTR_BT	0.738108	AGGATGCTTGGAGCTCTAGTTCTTTGTT	0.000221
Predict	LOC790324	C30	LTR/ERVK	ERV2-1-I_BT	0.696143	GCACATC	0.000237
Predict	ZNF689	C28	LTR/ERV1	ERV1-1-LTR_BT	0.662486	AGAGTTC	0.000237
Predict	LOC101111220	C26	LTR/ERV1	MER87_BT	0.652417	TGGTGAGCTCTAAGAGCTTGGCTTT	0.000247
Predict	ZNF746	C15	LTR/ERVK	BTLTR1B	0.676971	TGGGGACGGA	0.000248
Predict	ZNF286A	C28	LTR/ERV1	BtERVF2_I	0.733173	GAACCAGTGTGGGGTGTCTGGGTCTAGGATG	0.000251
Predict	ZSCAN4	C34	LTR/ERV1	ERV1-2C-LTR_BT	0.602014	GCAGGCCCAGGTG	0.000263
Predict	LOC102180074	C5	LTR/ERVK	BTLTR1	0.633395	GCAGACTCTGGTT	0.000269
Predict	LOC102179040	C21	LTR/ERV1	ERV1-3-I_BT	0.610321	GGGAAGGCCTCTGCCCAACCGGAGAAGG	0.000271
Predict	LOC108638027	C8	LTR/ERVK	BTLTR1B	0.665134	TATAGGAATGCAACTTTATTTGGAGGGT	0.00028
Predict	LOC108634301	C15	LTR/ERVK	BTLTR1B1	0.618375	GGTTGGG	0.000283
Predict	ZNF613	C14	LTR/ERVK	BTLTR1F	0.653544	CACTTCAAGGGAAAATAAGTTTTCTGGTTGAGCAGCC	0.000284
Predict	LOC114117925	C23	LTR/ERV1	ERV1-1C-LTR_BT	0.615081	TTGGCCCCCGGAGGAGAAG	0.000304
Predict	LOC114117925	C39	LTR/ERV1	ERV1-1C-LTR_BT	0.602864	TTGGCCCCCGGAGGAGAAG	0.000304
Predict	ZNF613	C27	LTR/ERVK	LTR46_BT	0.689779	TCATAATCTTGAAAACAAGATATGATCCTGGGGTCGG	0.000306
Predict	LOC102182436	C3	LTR/ERVK	BTLTR1C	0.648668	ATTAGAATAGGACTGATTAAAGGTTTCATTTGTTGAGCCA	0.000309
Predict	LOC108638027	C40	LTR/ERV1	MER87B_BT	0.742645	TGGATGATTACAATAACCACAGCAGTGA	0.000335
Predict	LOC102186683	C3	LTR/ERVK	BTLTR1B1	0.692479	GTAGTAGGAA	0.000336
Predict	LOC102186683	C18	LTR/ERVK	BTLTR1B1	0.61869	GTAGTAGGAA	0.000336
Predict	LOC102186683	C8	LTR/ERVK	BTLTR1B	0.639992	GTAGTAGGAA	0.000336
Predict	LOC108633323	C20	LTR/ERV1	BtERVF2_I	0.67771	TGGATTCTATCTGGGGGAATAGTTCTTTGTTGAT	0.000339
Predict	LOC787554	C32	LTR/ERVK	LTR2_BT	0.72489	GTGATTCTGACTT	0.000362
Predict	ZNF263	C28	SINE/tRNA	SINE2-3_BT	0.60581	TTGGAAGGTGAAG	0.000389
Predict	LOC105602107	C31	SINE/MIR	MIRb	0.623857	AGGGGCAGAGCCTGGATGTGGAGGC	0.000398
Predict	LOC102189337	C8	LTR/ERVK	BTLTR1C	0.688358	ATTAGAATAGGACTGATTAAAGGTTTCATTT	0.000409
Predict	LOC108634301	C12	LTR/ERVK	BTLTR1B1	0.694701	GGTTTGT	0.000413
Predict	ZNF382	C12	LTR/ERVK	ERV2-1-I_BT	0.722606	AATAAGCCCTCACCAGCAACTTGGA	0.000419
Predict	LOC102172294	C13	LTR/ERVK	BTLTR1B1	0.718837	ACCTGAGAGGCACGAGATGTTTTAGACT	0.000431
Predict	LOC102172294	C8	LTR/ERVK	BTLTR1B	0.723409	ACCTTTAAGATTAATCATGTTAAACCTT	0.000438
Predict	ZSCAN21	C28	LTR/ERV1	ALTR39_BT	0.926783	TCTAATTGGGTCTGTTACACCAAAATGGCAGACCAAGGGA	0.000445
Predict	LOC105605886	C13	LTR/ERVK	ERV2-1-I_BT	0.605614	ATTGAGCCTTTAAATTTTGATGGTGGCGCTC	0.000455
Predict	ZNF382	C15	LTR/ERVK	BTLTR1C	0.738554	CAGGAAATGCCAGGGGGAAAACCTG	0.000479
Predict	ZNF34	C11	SINE/tRNA	SINE2-3_BT	0.664468	CATGCCTCATGGCCAAAAAACCAAAACATAAAAC	0.000489
Predict	ZKSCAN1	C28	LTR/ERV1	BtERVF2_I	0.926783	TTGTGGGCCTCCGGGGTGA	0.000501
Predict	RBAK	C15	LTR/ERVK	BTLTR1B1	0.651197	ACTTTACGGGGAGCTCTCC	0.00051
Predict	ZNF782	C12	LTR/ERVL-MaLR	MLT1F	0.633525	GTAACATCTGAAAAAAGACTCTGCACTTTATCAT	0.000542
Predict	ZNF404	C11	LTR/ERVL-MaLR	MLT1C2	0.664468	AGGAGAAGCCACGTGGAGACGGAGGCAGAGACGGGAGGGA	0.000563
Predict	ZSCAN4	C31	SINE/tRNA	SINE2-1_BT	0.633355	GCACTTTCACTGC	0.000563
Predict	LOC787554	C35	LTR/ERV1	ALTR2B1_BT	0.679916	GTGCTAAATTCCT	0.000636
Predict	LOC102182436	C18	LTR/ERVL-MaLR	MLT1A	0.644713	GCTAGAAGTCCAAGATCAGGGTGCCAGCAAGGTGAGGTTC	0.00065
Predict	ZNF2	C11	LTR/ERVL-MaLR	MLT1C2	0.655538	CCTCCCGTCTCTGCCTCCGTCTCCA	0.000665
Predict	LOC102188077	C21	LTR/ERV1	ERV1-3-I_BT	0.610332	GGTTAAGAGAACAAAGTTT	0.000735
Predict	LOC102186683	C13	LTR/ERVK	BTLTR1B	0.657497	CTCATAAGAC	0.000887
Predict	ZNF3	C37	LINE/L1	L1MB5	0.614429	GGTGTATGAGTCACCATGAAAAGGA	0.000906
Predict	LOC102179040	C15	LTR/ERVK	BTLTR1B1	0.635443	GGTTGGGAGGCTGTAAACAATCACATGT	0.000983
