# Supplementary material
Source: HighWire-hosted journal article supplement (doi:10.1101/gr.281289.125)
Supplement: Supplemental_Table_S7.xlsx [file Supplemental_Table_S7.xlsx]

## Sheet: Table S7
Table S7: Experimentally validated KZFP-TE interactions conserved between humans and ruminants.
Source	KZFP	TE class	Family	Motif sequence	Validation
Predict	RBAK	C15	LTR/ERVK	ACTTTACGGGGAGCTCTCC	Imbeault et al.
Predict	ZFP57	C11	LTR/ERV1	GTTTGGG	Imbeault et al.
Predict	ZKSCAN1	C28	LTR/ERV1	TTGTGGGCCTCCGGGGTGA	Imbeault et al.
Predict	ZNF2	C11	LTR/ERVL-MaLR	CCTCCCGTCTCTGCCTCCGTCTCCA	Imbeault et al.
Predict	ZNF382	C12	LTR/ERVK	AATAAGCCCTCACCAGCAACTTGGA	Imbeault et al.
Predict	ZNF792	C2	LTR/ERVK	ACACTGCCAGGGACACAGCAGGTAAGGG	Imbeault et al.
JASPAR	ZNF10	C43	LINE/L1	CACCCTTTTCTCCCTGCAGAG	Imbeault et al.
JASPAR	ZNF394	C32	LINE/L1	CCTCCTCC	Imbeault et al.
JASPAR	ZNF554	C12	LTR/ERVK	AAGCAGAGCAC	Imbeault et al.
JASPAR	ZNF597	C45	LTR/ERV1	TGCGCCAGCTTA	Imbeault et al.
JASPAR	ZNF7	C27	LTR/ERV1	TAAACACTTGA	Imbeault et al.
JASPAR	ZNF7	C14	LTR/ERVK	AAAACACTTCA	Imbeault et al.
