# Supplementary material
Source: HighWire-hosted journal article supplement (doi:10.1101/gr.281289.125)
Supplement: Supplemental_Table_S8.xlsx [file Supplemental_Table_S8.xlsx]

## Sheet: Table S8
Table S8: Genomic details of 14 genes exhibiting taxon-specific TE exonization events.
Species	TE_chr	TE_start	TE_end	TE_strands	TE subfamilies	TE families	Gene_chr	Gene_start	Gene_end	Gene_strands	Exon_id	Transcript_id	Gene_id
WaterBuffalo	NC_059172.1	428948	429422	-	BTLTR1D2	LTR/ERVK	NC_059172.1	429064	429533	-	exon-XM_044929045.2-10	rna-XM_044929045.2	gene-ACAD8
WaterBuffalo	NC_059172.1	428948	429422	-	BTLTR1D2	LTR/ERVK	NC_059172.1	429064	429533	-	exon-XM_025265982.3-11	rna-XM_025265982.3	gene-ACAD8
Sheep	NC_056068.1	82108669	82109116	+	BTLTR1D2	LTR/ERVK	NC_056068.1	82108559	82109027	+	exon-XM_027979829.2-11	rna-XM_027979829.2	gene-ACAD8
Goat	NC_030822.1	30904118	30904565	+	BTLTR1D2	LTR/ERVK	NC_030822.1	30904006	30904476	+	exon-XM_018059402.1-11	rna-XM_018059402.1	gene-ACAD8
Cattle	15	83538965	83539437	+	BTLTR1D2	LTR/ERVK	15	83538854	83539318	+	exon-NM_001075551.1-11	rna-NM_001075551.1	gene-ACAD8
Cattle	12	52076049	52076930	+	LTR2C_BT	LTR/ERVK	12	52074642	52076854	+	exon-XM_025000141.1-4	rna-XM_025000141.1	gene-ACOD1
Cattle	12	52076049	52076930	+	LTR2C_BT	LTR/ERVK	12	52074642	52076854	+	exon-XM_005213873.4-5	rna-XM_005213873.4	gene-ACOD1
WaterBuffalo	NC_059169.1	37698106	37698983	-	LTR2C_BT	LTR/ERVK	NC_059169.1	37698585	37700391	-	exon-XM_044927219.2-3	rna-XM_044927219.2	gene-ACOD1
WaterBuffalo	NC_059169.1	37698106	37698983	-	LTR2C_BT	LTR/ERVK	NC_059169.1	37698585	37700391	-	exon-XM_025262741.3-4	rna-XM_025262741.3	gene-ACOD1
WaterBuffalo	NC_059169.1	37698106	37698983	-	LTR2C_BT	LTR/ERVK	NC_059169.1	37698585	37700391	-	exon-XM_006054107.4-4	rna-XM_006054107.4	gene-ACOD1
WaterBuffalo	NC_059169.1	37698106	37698983	-	LTR2C_BT	LTR/ERVK	NC_059169.1	37698585	37700391	-	exon-XM_006054106.4-5	rna-XM_006054106.4	gene-ACOD1
Sheep	NC_056074.1	11993767	11993818	-	BTLTR1J	LTR/ERVK	NC_056074.1	11983701	11994730	-	exon-XM_027960118.3-10	rna-XM_027960118.3	gene-ANKRD42
Sheep	NC_056074.1	11993767	11993818	-	BTLTR1J	LTR/ERVK	NC_056074.1	11983701	11994730	-	exon-XM_027960117.3-11	rna-XM_027960117.3	gene-ANKRD42
Sheep	NC_056074.1	11993767	11993818	-	BTLTR1J	LTR/ERVK	NC_056074.1	11983701	11994730	-	exon-XM_027960116.3-11	rna-XM_027960116.3	gene-ANKRD42
Sheep	NC_056074.1	11993767	11993818	-	BTLTR1J	LTR/ERVK	NC_056074.1	11983701	11994730	-	exon-XM_027960115.3-12	rna-XM_027960115.3	gene-ANKRD42
Goat	NC_030836.1	11880533	11880582	-	BTLTR1J	LTR/ERVK	NC_030836.1	11880313	11881497	-	exon-XR_001917480.1-11	rna-XR_001917480.1	gene-ANKRD42
Goat	NC_030836.1	11880533	11880582	-	BTLTR1J	LTR/ERVK	NC_030836.1	11880313	11881497	-	exon-XM_018043075.1-10	rna-XM_018043075.1	gene-ANKRD42
Goat	NC_030836.1	11880533	11880582	-	BTLTR1J	LTR/ERVK	NC_030836.1	11880313	11881497	-	exon-XM_018043074.1-11	rna-XM_018043074.1	gene-ANKRD42
Sheep	NC_056068.1	22266301	22266942	+	BTLTR1E1	LTR/ERVK	NC_056068.1	22266023	22268616	+	exon-XM_042232594.2-11	rna-XM_042232594.2	gene-BCO2
Sheep	NC_056068.1	22266301	22266942	+	BTLTR1E1	LTR/ERVK	NC_056068.1	22266023	22266351	+	exon-NM_001159278.2-12	rna-NM_001159278.2	gene-BCO2
WaterBuffalo	NC_059172.1	62911779	62912417	-	BTLTR1E1	LTR/ERVK	NC_059172.1	62912074	62912695	-	exon-XM_006065235.3-12	rna-XM_006065235.3	gene-BCO2
Cattle	15	22580430	22581066	+	BTLTR1E1	LTR/ERVK	15	22579981	22580770	+	exon-XM_024975217.1-12	rna-XM_024975217.1	gene-BCO2
Cattle	15	22580430	22581066	+	BTLTR1E1	LTR/ERVK	15	22580152	22580768	+	exon-NM_001101987.2-12	rna-NM_001101987.2	gene-BCO2
Goat	NC_030822.1	59795501	59796138	-	BTLTR1E1	LTR/ERVK	NC_030822.1	59795801	59796416	-	exon-XM_005689454.3-12	rna-XM_005689454.3	gene-BCO2
WaterBuffalo	NC_059172.1	71057956	71058030	+	BTLTR1	LTR/ERVK	NC_059172.1	71057995	71058072	+	exon-XM_044929783.2-2	rna-XM_044929783.2	gene-CEP57
Cattle	15	14485750	14485820	-	BTLTR1	LTR/ERVK	15	14485704	14485781	-	exon-XM_015474596.2-2	rna-XM_015474596.2	gene-CEP57
WaterBuffalo	NC_059161.1	38502027	38502430	-	ERV2-2B_BT-LTR	LTR/ERVK	NC_059161.1	38502066	38502141	-	exon-XM_044942987.1-1	rna-XM_044942987.1	gene-EXOSC10
Cattle	16	42524040	42524443	+	ERV2-2B_BT-LTR	LTR/ERVK	16	42524351	42524404	+	exon-XM_024976346.1-1	rna-XM_024976346.1	gene-EXOSC10
Goat	NC_030810.1	55205182	55205698	+	LTR46_BT	LTR/ERVK	NC_030810.1	55204070	55205801	+	exon-XR_001917826.1-9	rna-XR_001917826.1	gene-IFI44
Sheep	NC_056054.1	55121181	55121700	+	LTR46_BT	LTR/ERVK	NC_056054.1	55120069	55121634	+	exon-XM_042250161.1-9	rna-XM_042250161.1	gene-IFI44
WaterBuffalo	NC_059168.1	7038951	7039483	-	LTR3_BT	LTR/ERVK	NC_059168.1	7036901	7041567	+	exon-XM_006060662.4-1	rna-XM_006060662.4	gene-IL18R1
WaterBuffalo	NC_059168.1	7038951	7039483	-	LTR3_BT	LTR/ERVK	NC_059168.1	7036901	7041567	+	exon-XM_006060658.4-1	rna-XM_006060658.4	gene-IL18R1
Cattle	11	7155570	7156102	-	LTR3_BT	LTR/ERVK	11	7154130	7158183	+	exon-XM_005212462.4-1	rna-XM_005212462.4	gene-IL18R1
Cattle	11	7155570	7156102	-	LTR3_BT	LTR/ERVK	11	7154130	7158183	+	exon-XM_005212458.4-1	rna-XM_005212458.4	gene-IL18R1
Sheep	NC_056060.1	24445419	24446102	-	ERV2-2-I_BT	LTR/ERVK	NC_056060.1	24436777	24449810	-	exon-XM_012181046.5-14	rna-XM_012181046.5	gene-METTL17
Sheep	NC_056060.1	24437294	24437874	-	BTLTR1J	LTR/ERVK	NC_056060.1	24436777	24449810	-	exon-XM_012181046.5-14	rna-XM_012181046.5	gene-METTL17
Sheep	NC_056060.1	24437294	24437874	-	BTLTR1J	LTR/ERVK	NC_056060.1	24436777	24440184	-	exon-XR_009601448.1-15	rna-XR_009601448.1	gene-METTL17
Sheep	NC_056060.1	24448670	24449137	-	BTLTR1J	LTR/ERVK	NC_056060.1	24448590	24449810	-	exon-XR_009601448.1-14	rna-XR_009601448.1	gene-METTL17
Sheep	NC_056060.1	24448670	24449137	-	BTLTR1J	LTR/ERVK	NC_056060.1	24436777	24449810	-	exon-XM_012181046.5-14	rna-XM_012181046.5	gene-METTL17
Sheep	NC_056060.1	24442478	24442850	-	ERV2-2-I_BT	LTR/ERVK	NC_056060.1	24436777	24449810	-	exon-XM_012181046.5-14	rna-XM_012181046.5	gene-METTL17
Goat	NC_030817.1	76812181	76812661	+	BTLTR1J	LTR/ERVK	NC_030817.1	76811500	76812409	+	exon-XM_005685386.3-14	rna-XM_005685386.3	gene-METTL17
Sheep	NC_056060.1	24449401	24449533	-	BTLTR1J	LTR/ERVK	NC_056060.1	24448590	24449810	-	exon-XR_009601448.1-14	rna-XR_009601448.1	gene-METTL17
Sheep	NC_056060.1	24449401	24449533	-	BTLTR1J	LTR/ERVK	NC_056060.1	24436777	24449810	-	exon-XM_012181046.5-14	rna-XM_012181046.5	gene-METTL17
Goat	NC_030817.1	76811785	76811917	+	BTLTR1J	LTR/ERVK	NC_030817.1	76811500	76812409	+	exon-XM_005685386.3-14	rna-XM_005685386.3	gene-METTL17
Sheep	NC_056065.1	11793212	11794042	-	BTLTR1B	LTR/ERVK	NC_056065.1	11793567	11795348	-	exon-XM_042257072.2-8	rna-XM_042257072.2	gene-RGS13
Sheep	NC_056065.1	11794428	11794878	-	BTLTR1B	LTR/ERVK	NC_056065.1	11793567	11795348	-	exon-XM_042257072.2-8	rna-XM_042257072.2	gene-RGS13
Goat	NC_030823.1	11187039	11187490	-	BTLTR1B	LTR/ERVK	NC_030823.1	11187466	11187960	-	exon-XM_013970062.2-5	rna-XM_013970062.2	gene-RGS13
Sheep	NC_056065.1	11794135	11794305	-	ERV2-1B-LTR_BT	LTR/ERVK	NC_056065.1	11793567	11795348	-	exon-XM_042257072.2-8	rna-XM_042257072.2	gene-RGS13
WaterBuffalo	NC_059168.1	25251332	25251375	+	BTLTR1	LTR/ERVK	NC_059168.1	25251275	25252144	-	exon-XM_044925862.2-38	rna-XM_044925862.2	gene-THADA
Cattle	11	25519406	25519449	+	BTLTR1	LTR/ERVK	11	25519336	25520366	-	exon-XM_024999385.1-37	rna-XM_024999385.1	gene-THADA
Sheep	NC_056060.1	21202686	21202725	-	BTLTR1B	LTR/ERVK	NC_056060.1	21197646	21203642	-	exon-XM_060418556.1-2	rna-XM_060418556.1	gene-THTPA
Sheep	NC_056060.1	21202686	21202725	-	BTLTR1B	LTR/ERVK	NC_056060.1	21197646	21203642	-	exon-XM_060418555.1-2	rna-XM_060418555.1	gene-THTPA
Goat	NC_030817.1	80049893	80049932	+	BTLTR1B	LTR/ERVK	NC_030817.1	80048973	80050626	+	exon-XM_013966866.2-2	rna-XM_013966866.2	gene-THTPA
Goat	NC_030817.1	80049893	80049932	+	BTLTR1B	LTR/ERVK	NC_030817.1	80048973	80050626	+	exon-XM_013966864.2-2	rna-XM_013966864.2	gene-THTPA
Sheep	NC_056054.1	60876273	60876339	+	BTLTR1	LTR/ERVK	NC_056054.1	60876199	60876341	-	exon-XR_009599633.1-21	rna-XR_009599633.1	gene-TTLL7
Sheep	NC_056054.1	60876273	60876339	+	BTLTR1	LTR/ERVK	NC_056054.1	60876199	60876341	-	exon-XR_009599631.1-22	rna-XR_009599631.1	gene-TTLL7
Sheep	NC_056054.1	60876273	60876339	+	BTLTR1	LTR/ERVK	NC_056054.1	60876199	60876341	-	exon-XR_006059909.1-22	rna-XR_006059909.1	gene-TTLL7
Sheep	NC_056054.1	60876273	60876339	+	BTLTR1	LTR/ERVK	NC_056054.1	60870638	60876341	-	exon-XM_060411225.1-21	rna-XM_060411225.1	gene-TTLL7
Cattle	3	60243795	60243861	-	BTLTR1	LTR/ERVK	3	60243793	60243935	+	exon-XR_001497116.2-21	rna-XR_001497116.2	gene-TTLL7
WaterBuffalo	NC_059162.1	60043008	60043073	-	BTLTR1	LTR/ERVK	NC_059162.1	60043005	60043147	+	exon-XR_006551842.2-21	rna-XR_006551842.2	gene-TTLL7
Goat	NC_030810.1	60951894	60951955	+	BTLTR1	LTR/ERVK	NC_030810.1	60951536	60951962	-	exon-XM_018045670.1-22	rna-XM_018045670.1	gene-TTLL7
Cattle	21	22300215	22301457	-	BTLTR1C	LTR/ERVK	21	22300562	22303327	-	exon-XM_005221845.4-8	rna-XM_005221845.4	gene-WDR73
WaterBuffalo	NC_059176.1	47771831	47773092	+	BTLTR1C	LTR/ERVK	NC_059176.1	47769966	47772734	+	exon-XM_006058288.4-8	rna-XM_006058288.4	gene-WDR73
