# Supplementary material
Source: HighWire-hosted journal article supplement (doi:10.1101/gr.281289.125)
Supplement: Supplemental_Table_S9.xlsx [file Supplemental_Table_S9.xlsx]

## Sheet: Table S9
Table S9: Genomic details of 951 TE associated structural variants identified across 11 cattle breeds.
Chr	Start	End	Ref	Alt	Location	Gene annotation
1	536239	537459	GTGCCGGGGTCCAGCCCTGGTGGATCCAGGGAATTTGAAGTGGGGATGGCGTCGGCGAGGATCAGGAAACAACTGCTTGATTAAACGTTAATTAAGGATATAAAGAGTAATAGAATAAGGATAGCTCAGTAGGAAAATTCAGTGAAGAAAAGAGGCTGAAATAAGGATATCTCAGTGAGGAAATTCAGTGGAGAAAAGAGGCTGAATAATTCAGCCAGAAGGTGAGAGAAAGAATGACATGGGGAGACCAAGTTTCGGTGAACAAGGCCCGCACTTTATTTTCCAAAGTAGTTTTTCTACCTTAAGTTATGCATAGAGAATAGTGGGGGAAGGGGTAGAGTCATGCAGCAAGCCAGGCTTTCTTCCTGCAAACTTACCATATGCAAAAGCTTAGGTGAT…	G	intronic	gene-LOC618212
1	2623343	2623343	G	GGGAGAGTTCCGGGGACCAGCCCCGGCTGATCCAGGGTACTCGAAGGAGAGACGGCGTCGGCGAAGATCAGGAAACAATTGCTTAATTAAACGTTAATTAAGGATATAAAGAGTGATAGAATAAGGATAGCTCAGTAGGAAAATTCAGTGGAGAAAAGAGGCTGAGTAGCTTGGTTTACGCGGGGGACCAATAAAACTTCAAGACAAGAAGCTTGCACCACTTACGTAGGCCGCAGGCGTCCTTCCGTTCTCCCGAAGGAGAGGAGACACTGAGGCCTCCCCGGTCGGATCTTAGAAGCCCAGGCAAAATTAGTAAGTTTGGTGGGTTCCGCGCTCCAGATGGAGACTCAGCCAGAGGGAGAGAGAGACATGGGGAGACCAGTATTTCGAGAAACTGAT…	intergenic	gene-OLIG2(dist=74088),gene-C1H21orf62(dist=125825)
1	4842371	4843600	GCCTCTCTGCCGGGGACCAGCCCCGGCTGATCCAGGGAATTCGAAGCGGGGACGGCGTCGGCGAAGATCAGGAAACAATTGCTTAATTAAACGTTAATTAAGGATATAAAGAGTAATAGAATGAGGATAGCTCAGTAGGAAAATTCAGTGGAGAAAAGAGGCTGAAATAAGGATAGCTCAGTGAGGAAATTCAGTGGAGAAAAGAGGCTGAATAATTCAGCCAGAAGGTAAGAGAAAGAACGACATGGTGAGACCAAGTTTCGGTGAACAAGGCCCGCACTTTATTTTTCAAAGTAGTTTTTATACCTTAAGTTATGCACAGAGGATAATGGGGGAAGGGGTAGAGTCAGGCAGCAAGCCAGGCTTTCTTCCTGCAAACTTAGCATATGCAAAAGTTAG…	G	intergenic	gene-KRTAP8-1(dist=82202),gene-LOC112446888(dist=1426)
1	7985822	7985822	G	GTCGAGTTGCCGGGGACCAGCCCCGGCTGATCCAGGGTATTCGAAGGAGAGACGGCATAGGCGAGGATCAGGATACGATAGCTTCAATTAGGTATTAATTAAAGATATAAAGAGTAATAGAATAAGGATAGCTCAGTAGGAAAATTCAGTGGAGAAAAGAGGCTGAGTAGCTTGGTTTACGCGGGAGACCAATAAAACTTCAAGACAAGAAGTTTGCACCACTTACGTAGGCCGCAGGCGTCCTTCCGTTCTCCCGAAGGAGAGGAGACACTGAGGCCTCCCCGGTCGGATCTTAGAAGCCCAGGCATAATTAGTAAGCATGGTGGGTTCCGCGCTCCAGATGGAGACTCAACCAGAGTGAGAGAGAGAGCGACATGGGGAGACCAGTATTTCGAGAAA…	intergenic	gene-N6AMT1(dist=704946),gene-LOC112447279(dist=932234)
1	12320076	12320077	TG	TTGCCAGGGACCAGCCCCGGCTGATCCAGGGTATTCGAAGGAGAGACGGCATAGGCGAGGATCAGGATACAATAGCTTCAATTAGATATTAATTAAAGATATAAAGAGTAATAGAATAAGGATATCTCAGTAGGAAAATTCAGTGGAGAAAAGAGGCTGAGTGGCTTGGTTTACGCAGGAGACCAATAAAACTTCAAGACAAGAAGTTTACACCACTTACGTAGGCCACAGGCGTCCTTCCGTTCTCCCGAAGGAGAGGAGACACTGAGGCCTTCCCGGTCGGATCTTAGAAGCCCAGGCATAATTAGTAAGCATGGTGGGTTCCGCGCTCCAGATGGAGACTCAACCAGAGTGAGAGAGAGAGCGACATGGGGAGACCAGTATTTCGAGAAACTGATC…	intergenic	gene-MIR155(dist=1471364),NONE(dist=NONE)
1	16855330	16856611	CCTTTCTTGCCGGGGTCCTGCCCCGGCTGATCCAGGGTATTCGAAGCGGGGACGGCGTCGGCGACCTATTTATTTAAATATTTTATCAAAGATATAAAGAGTAATAGGATGAGGATAGCTCAGTAGGAAAATTCAGTGGAGAAAAGAGGCTGAGTAGCTTGGTTTACGCGGGAGACCAATAAAACTTCAAGACAAGAAGTTTGCACCACTTACGTAGGCCGCAGGCGTCCTTCTGTTCTCCCGAAGGAGAGGAGACACTGAGGCCTCCCCGGTCGGATCTTAGAAGCCCAGGCATAATTAGTAAGCATGGTGGGTTCCGCGCTCCAGATGGAGACTCAACCAGAGTGAGAGAGAGAGCGACATGGGGAGACCAGTATTTCGAGAAACTGATCCCAATTC…	C	intergenic	gene-TRNAC-GCA-2(dist=11343),gene-TMPRSS15(dist=1711330)
1	17089191	17089191	G	GAAGTCCGATGCCGGGAGCCGGCATATTGCATATTGAGTGCATATTGCATATTGAGTGCAGCACTTTTCAGGATCTGGAATAGCTCAACTGGAATTCTATCACTGCCGGTAGCCAGCGTGAGGAACTCCGCCCATGACAAAGGTCATGAGGAAGGAGGCTCGGCATACGCAAAGGCGGGATCGAGCTTCAGGAGTCCCCCTGGAAATTCTCGAGCATATACCCCCAAAACCAGAGTCTGCCTACTTTCTGCTTTGTGCTTTCACCTACACCTCTGACTTTACGGGGGGCTGTCCCCCACTACCTCTCTGAAAAAAGAGTTAGCTTACAGCTCCAGTTAATAATTCCTGGGTGTGACAGTGTTTAACCTACAAACTCCTTTGGAAATCCTCTAGCCTGCC…	intergenic	gene-TRNAC-GCA-2(dist=245204),gene-TMPRSS15(dist=1478750)
1	18901688	18902954	TATAGAAAACTGCCGGGAGCCGGCATATTGCATATTGAGTGCATATTGCATATTGAGTGCAGCACTTTTCAGGATCTGGAATAGCTCAACTGGAAATTCTATCACTGCCGGTAGCCAGCGTGAGGAACTCCGCCCATGACAAAGGTCATGAGGAAGGAGGCTCGGCATACGCAAAGGCGGGATCGAGCTTCAGGAGTCCCCCTGGAAATTCTCGAGCATATACCCCCAATACCAGAGTCTGCCTACTTTCTGCTTTGTGCTTTCACCTACACCTCTGACTTTACGGGGGGCTGTCCCCCACTACCTCTCTGAAAAAAGTTAGCTTACAGCTCCAGTTAATAATTCCTGGGTGTGACAGTGTTTAACCTACAAACTCCTTTGGAAATCCTCTAGCCTGCC…	T	intergenic	gene-CHODL(dist=164828),gene-C1H21orf91(dist=324601)
1	20742104	20742104	C	CAGGATTTGAAATAGCTCCACTGGAATTCCATCACCTCCACTGGCATATTGAGTGCAGCACTTTCACAGCATCATCTTTT	intergenic	gene-MIR99A(dist=306681),gene-USP25(dist=418118)
1	21365068	21366365	TGTGAATTGCGGGGAGCCGGTGAGGCATTCCACTCATGACAAAGGTCATGAGGAAGGAGGTTTGGCATACGCAAAGGCGGGATCGAGCCTCAGGAGTCCCCCCGGATATTCTCGAGCATTTTCCCCCAAAAAACCAGAGTCTGCCTACTTTATTGCTTTGTGCTCTCACCTCTGACTTTACTGGGGGCTGTCCCCTACCACCATCTCTCTCTCTCTGTGTCAAAGAGTTAACTTACAGCTCCAATTAATAAAGTTCCTGGGCAATTAGGAGTGTTTAAATCCAAACCCCTCTGACGGCTCTCTAACTCGCCTGACAAGTTTACCCGGACTCCTGCAGCTATGCATACGATTGTTTACAGTCTCCCAGCCTCGAGAGGCATGGGAAGCTTAAGATATTCA…	T	intergenic	gene-USP25(dist=36601),gene-LOC107132175(dist=727423)
1	21365530	21365595	ATGAGTCAATGCTTGTTGCCAAGTTTTCACATCCCCTGAATTGTATCCTTGAATATGTATCAATTA	ACAGAG	intergenic	gene-USP25(dist=37063),gene-LOC107132175(dist=728193)
1	21365726	21365912	AAGATGGTGCCAAACCTTGAAATAATTACTCTTAGAGAAAGTAAGTCTTTGTTGATAAGTCCTTGTCAAGAGTCATAAAATGTTAGTAGGCCTTCTGGCCAGAAGATGATGTGAATCACCTAAACCATTTGTATACGATACATTTGCAGGAAAGAAACCTTGGTTTTTGATAAGAACCAAAGACTGC	AGCT	intergenic	gene-USP25(dist=37259),gene-LOC107132175(dist=727876)
1	21365939	21366016	ATGTGTAACTTAGGGTATAAAAGCCCCTGTTAAAAATAAAGCTACGGGCCTTGCTCACCAACGCTTGGTCTCCCCATG	A	intergenic	gene-USP25(dist=37472),gene-LOC107132175(dist=727772)
1	21591083	21591083	T	TGATGAGTGCCGGGGACCAGCCCCGGCTGATCCAGGGTATTCGAAGGAGAGACGGCATAGGCGAGGATCAGGATACAATAGCTTCAATTAGATATTAATTAAAGATATAAAGAGTAATAGAATAAGGATAGCTCAGTAGGAAAATTCAGTGGAGAAAAGAGGCTGAGTAGCTTGGTTTACGCGGGAGACCAATAAAACTTCAAGACAAGAAGTTTGCACCACTTACGTAGGCCGCAGGCGTCCTTCCGTTCTCCCGAAGGAGAGGAGACACTGAGGCCTCCCCGGTCGGATCTTAGAAGCCCAGGCATAATTAGTAAGCATGGTGGGTTCCGCGCTCCAGATGGAGACTCAGCCAGAATGAGAGAGAGAGCGACATGGGGAGACCAGTATTTCGAGAAA…	intergenic	gene-USP25(dist=262616),gene-LOC107132175(dist=502705)
1	25647610	25647610	G	GCCCTTCTGCCGGAGCCAGCCGGCAAACTCGATCAGGTCCCGAGAACGTGCACGGCGGGGCTAAGAAAGAAACTAAAGCAAGAGACTACAAAGATGGGGTCGAGAGGTTCAGACACGTCACCACGAAGGGACGCAGTCTGACACCAACTTTATTCAACATCTCATATTTATACAGAAAAGCGTGAGAAAGACAAGACAGTTGACATTTTTTCTTGGTTAGCCTATACATCTTACAAACAGTCACAAGAAATCTTGAGAGCATGGGAATGGCTCCCTGTTATTATTTCTTACACCAGATAACATTTCTCTGTGCGTGAGAAGTTTGCACAGAATTCCAGGTGCCTGCAGTAAATAAGCGCCTAATCTCTGGGGTGGCGGGACAGAGAGCTATGTTTGCAA…	intergenic	gene-ROBO2(dist=579569),gene-TRNAG-UCC(dist=295638)
1	27751169	27752473	TCCTAACTGTTGGGGGCCAGAGTGAGGTACTCCGCCCATGACAAAGGTCATGAGGAAGGAGGCTCGACATACGCAAAGGCGGGATCGAGCCTCAGGAGTCCCCCTGGAACTCCTCGAGCATCTACCCCCATAACCAGAGCCTGCCTACTTTACTACTTTGTGCTCTTACCTACACCTCTGACTTTACGGGGGGCTGTCCCCTACCACCTCTTTTGGAGAAGGAGTTAACCTAGAGCTCCAGTCAATAAAAACTCTTGGGTGTGACAAGAGTGTTTTAACCTACAAACTCCTCTGAAGGTTCTCTAGCCTGCCTGACAGGCTTGTCCGGCCACATGTGATTGCTCACAGCCTCCCAACCGTGAGAGGCACGAGATGCTTTAAACCTTCTAAAAACAGGTG…	T	intergenic	gene-TRNAC-GCA-3(dist=296963),gene-TRNAC-ACA(dist=251237)
1	31753124	31753295	AGGTGATTTACATCATCTTCTGGCCAGAAGGCCTACTAACATTTTATGACTCTTGACAAGGACTTATCAATAAAGACTTATTTTCTCTAAGAGTAATTATTTTAAGGTTTGGCGCCATCTTCCAAAGATAAAATTGCATTCCTATAGGGCGGATGTGTAATGGGTTTACAAC	A	intergenic	NONE(dist=NONE),gene-CADM2(dist=1073906)
1	37675919	37676011	GAATAAGGATAGCTCAGTGAGGAAATTCAGTGGAGAAAAGAGGCTGAAATAAGGATAGCTCAGTGAGGAAATTCAGTGGAGAAAAGAGGCTGA	G	intergenic	gene-EPHA3(dist=156639),gene-PROS1(dist=527307)
1	39298667	39298667	T	TAATATGTGCTGGGGTCCTCCCCCGGCTGATCAGGGTATTCGAAGCGGGAGGCGGTGTCGGCGACCTATTTATTTATTTAAATATTTTATCAAAGATATAAAGAGTAATAGGATGAGGCTAGCTCAGTAGGAAAATTCAGTGGAGAAAAGAGGCTGAAAGGCTTGGTTTACGCGGGAGACCAATAAAACTTCAAGACAAGAAGTTTGCACCACTTACGTAGGCCGCAGGCGTCCTTCCGTTCTCCCGAAGGAGAGGAGACACTGAGGCCTCCCCGGTCGGATCTTAGAAGCCCAGGCATAATTAGTAAGCATGGTGGGTTCCGTGCTCCAGATGGAGACTCAACCAGAGTGAGAGAGAGAGCGACATGGGGAGACCAGTATTTCGAGAAACTGATCCCC…	intergenic	gene-NSUN3(dist=877810),gene-LOC782966(dist=1650280)
1	40596085	40596085	A	AAAGGTCATGTGGAAGGAGGCTAGGCATACGCAAAGGCAGGATCGAGCCTCGGGAGTCTCCCCGGATATTCTCGAGTATCTTCCCCCAAAAAACCAGAGTCTGCCTACTTTATTGCTTTGTGCTCTCACCTCTGACTTTACTGGGGGCTGTCCCCTACCACCATCTCTCTCTCTCTGTCAAAGAGTTAACTTACAGCTCCAATTAATAAAGTTCCTGGGCAATTAGGAGTGTTTAAATCCAAACCCCTCAGATAGCTCTCTAACTCGCCTGACAAGTTTACCCGGACTCCTGTAGCTATGCATACGATTGTTTACAGTCTCCCAGCCTCCAGAGGCATGGGAAGCTTAAGATATTCAAATAGCTTAGAGCCTCTCAGAGAGTTAGAAACTGTCAGAATA…	intergenic	NONE(dist=NONE),gene-LOC782966(dist=352862)
1	44772302	44772306	ATTGC	AACTTGGCAGCAAGCATTGGCTCATCAGTGAAATCTTTTACTAGTTTTATTCTGACAGTTTATAACTCTCTGAGAGGCTCTAAGCTATTTGAATATCTTAGGCTTCCCATGCCTCTCGCGGCTGAGAGACTGTAAACAATCATGTGCATAGCTGTAGGAGTCCAGGTAAACTTGTCAGGCGAGTTAGAGAGCTATCTGAGGGGTTTGGATTTAAACACTCCTATTATGCCGAGGAACTTTATTAACTGGAGCTGTAAGTTAACTCCTTTTCAGAGAGAGCGAGATGGTGGTGGGGGACAGCCCCCGTAAAGTCAGAGGTGAAAGCACAAAGCAGTAAAGTAGGCAGACTCTGGTTTTGGGGGTAGATGCTCGAGAATATCCAGGGGGACTCCTGAGGCT…	intronic	gene-LOC529036
1	49481555	49482834	CACACTTTTGTGCCGGGGTCCTGCCCCGGCTGATCCAGGGTATTCGAAGCGGGAACGGCGTCGGCGACCTATTTATTTAAATATTTTATCAAAGATATAAAAAGTAATAGGATGAGGATAGCTCAGTAGGAAAATTCAGTGGAGAAAAGAGGCTGAGTAGCTTGGTTTACGCGGGAGACCAATAAAACTTCAAGACAAGAAGTTTGCACCACTTACGTAGGCCGCAGGCGTCCTTCCGTTCTCCCGAAGGAGAGGAGACACTGAGGCCTCCCCGGTCGGATCTTAGAAGCCCAGGCATAATTAGTAAGCATGGTGGGTTCCGCGCTCCAGATGGAGACTCAACCAGAGTGAGAGAGAGAGCGACATGGGGAGACCAGTATTTCGAGAAACTGATCCCAA…	C	intergenic	gene-TRNAF-AAA(dist=1902561),gene-ALCAM(dist=447945)
1	51299707	51299707	T	TTTTTTTTTTTAATTTTATTTTATTTTTAAACTCCACATAATCGTATCAGTTCTGCCAAACATCAAAACGAATTAGAAACTGCCGAGGACCAGCCCCGGCTGATCCAGGGTATTCGAAGGGGAGACGGCGTCGGCGACTATTTATATGCTAATTAGAGATATA	intergenic	gene-CBLB(dist=818308),gene-MIR2286(dist=488694)
1	51299721	51299721	T	TGAGGATAGCTCAGTAGGAGAATTCAGTGGAGAAAAGAAGCTGAGTAGCTTGGTTTACGCGGGAGACCAATAAAACTTCAAGACAAGAAGTTTGCACCACTTACGTAGGCCGCAGGCGCCCTCTCGAATAGCGGAAGGTGTCTCACCCTAGACACCTTCTCGAGTGGGTCTTAGAAGCCCAGGCATGATTAGTAAGCGTGGTGGGTTCCGCGCTCCAGATGGAGACTCAGCTGGAAGTTAAAAGAAAGAATGACATGGGGAGACCAAGCGTTGGTGAGCAAGGCCCGTAGCTTTATTTTTAACAGGGGCTTTTATACCCTAAGTTACACATAGAGGATAATAGGGGATGCAAAGTCAGCAGTCTTTGATTCTTATCAAAAACCAAGGTTTCTTTCCTGC…	intergenic	gene-CBLB(dist=818322),gene-MIR2286(dist=488680)
1	56169122	56170425	GAATAATTGCCGAGGACCAGCCCCGGCTGATCCAGGTATTCGAAGGAGAGACGGCGTAGGCGAAGATCAGGATACGATAGCTTCAATTAGATATTAATTAGAGATATAAAGAGTAATAGAATAAGGATAGCTCAGTAGGAAAATTCAGTGGAGAAAAGAGGCTGAGTAGCTTGGTTTACGCGGGGGACCAATAAAACTTCAAGACAAGAAGCTTGCACCACTTACGTAGGCCGCAGGCGTCCTTCCGTTCTCCCGAAGGAGAGGAGACACTGAGGCCTCCCCGGTCGGATCTTAGAAGCCCAGGCATAATTAGTAAGCATGGTGGGTTCCGCGCTCCAGATGGAGACTCAGCCAGAGTGAGAGAGAGAGTGACATGGGGAGACCAGTATTTCGAGAAAC…	G	intergenic	gene-NECTIN3(dist=34665),gene-CD96(dist=135738)
1	56413357	56413357	C	CAAGGAGTGTTGGGGGCCAGAGTGAGGTACTCCGCCCATGGCAAAGGTCATGAGGAAGGAGGCTCGACATACGCAAAGGCGGGATCGAGCCTCAGGAGTCCCCCTGGAAATCCTCGAGCGTCTACCCCATAACCAGAGCCTGCCTACTTTACTACTTTGTGCTCTTACCTACACCTCTGACTTTACGGGGGGCTGTCCCCCACCACCTCTTTCGGAGAAGGAGTTAACCTAGAGCTCCAGTCAATAAAAACTCTTGGGTGTGGCAAGAGTGTTTTAACCTACAAACTCCTCTGAAGGTTCTCTGGCCTGCCTGACAGGCTCGTCCGGCCACATGTGATTGCTCACAGCCTCCCAACCATGAGAGGCACGAGATGCTTTAAACCTTCTAAAAACAGGTTC…	intergenic	gene-CD96(dist=10497),gene-PLCXD2(dist=12081)
1	59731888	59731888	T	TCACATCTGCCGGGGACCAATTCCGGCTGATCCAGGGTATTCGAAGGAGAGACGGCATAGGCGAAGATCAGGAAACAACTGCTCGCTCCCCACA	intergenic	gene-MIR568(dist=778009),gene-ZBTB20(dist=81387)
1	63076335	63077463	GTGTGGGGAGCGAGCTCCGCCTCTGGCAAAGGTCATGAGGAAGGAGGCTTGGCATACGCAAAGGCGGGATCAAGCCTCAGGAGTCTCCCTGGAAATTCTCGAGCATATACCCCCAAAACCAGAGTCTGCCTACTTTCTGCTTTGTGCTTTCACCTACACCTCTGACTTTACGGGGGGCTGTCCCCCACTACCTCTCTGAAAAAAGTTAGCTTACAGCTCCAGTTAATAATTCCTGGGTGTGACAGTGTTTAACCTACAAACTCCTTTGGAAATCCTCTAGCCTGCCTGAATAGGTTTTTCCGGCCACATGTGATTGTTCAGAGCCTCCCAACTGTGAGAGGCAGGAGATGTTCTAAACTGTCTAAACACAGATTCTTTTGAGTAGTTAAAAGATTGATT…	GATCAC	intergenic	gene-TRNAR-GCG(dist=656761),gene-IGSF11(dist=670686)
1	71633086	71633086	T	TAGGGGTTGCCGGGAGCCGGCATATTGCATATTGAGTGCATATTGCATATTGAGTGCAGCACTTTTCAGGATCTGGAATAGCTCAACTGGAATTCTATCACTGCCGGTAGCCAGCGTGAGGAACTCCGCCCATGACAAAGGTCATGAGGAAGGAGGCTTGGCATACGCAAAGGCGGGATCAAGCCTCAGGAGTCTCCCTGGAAATTCTCGAGCAATCTACCCCCAAAACCAGAGTCTGCCTACTTTCTGCTTTGTGCTTTCACCTACACCTCTGACTTTACGGGGGGCTGTCCCCCACTACCTCTCTGAAAAAAGTTAGCTTACAGCTCCAGTTAATAATTCCTGGGTGTGACAGTGTTTAACCTACAAACTCCTTTGGAAATCCTCTAGCCTGCCTGA…	intronic	gene-DLG1
1	81476356	81477645	GCCAGCCTGCCGGGGACCTGCCCCGGCTGATCCAGGGTATTCGAAGCGGGGACGGCGTCGGCGACCTATTTATTTAAATATTTTATCAAAGATATAAAGAGTAATAGGATGAGGATAGCTCAGTAGGAAAATTCAGTGGAGAAAAGAGGCTGAGTAGCTTGGTTTACGCGGGAGACCAATAAAACTTCAAGACAAGAAGTTTGCACCACTTACGTAGGCCGCAGGCGTCCTTCCGTTCTCCCGAAGGAGAGGAGACACTGAGGCCTCCCCGGTCGGATCTTAGAAGCCCAGGCATAATTAGTAAGCATGGTGGGTTCCGCGCTCCAGATGGAGACTCAACCAGAGTGAGAGAGAGAGCGACATGGGGAGACCAGTATTTCGAGAAACTGATCCCAATTC…	G	intronic	gene-IGF2BP2
1	88085065	88086358	TCTTTTCTGCCGGGGACCAGCCCCGGCTGATCCAGGGTATTCGAAGGAGAGACGGCATAGGCGAGGATCAGGATACGATAGCTTAATTAAACATTAATTAAGGATATAAAGAGTAATAGAATGAGGATAGCTCAGTAGGAAAATTCAGTGGAGAAAAGAGGCTGAGTAGCTTGGTTTACGCGGGAGACCAATAAAACTTCAAGACAAGAAGTTTGCACCACTTACGTAGGCCGCAGGCGTCCTTCCGTTGTCCCGAAGGAGAGGAGACACTGAGGCCTCCCTGGTCGGATCTTAGAAGCCCAGGCATAATTAGTAAGCATGGTGGGTTCCGCGCTCCAGATGGAGACTCAGCCAGAGTGAGAGAGAGCGCGACATGGGGAGACCAGTATTTTGAGAAAC…	T	upstream	gene-TRNAG-UCC-2
1	91061601	91061601	T	TCAAGGCTGCCGGGAGCCGGCATATTGCATATTGAGTGCATATTGCATATTGAGTGCAGCACTTTTCAGGATCTGGAATAGCTCAACTGGAATTCTATCACTGCCGGTAGCCAGCGTGAGGAACTCCGCCCATGACAAAGGTCATGAGGAAGGAGGCTCGGCATACGCAAAGGCGGGATCGAGCTTCAGGAGTCCCCCTGGAAATTCTCGAGCATATACCCCCAAAACCAGAATCTGCCTACTTTCTGCTTTGTGCTTTCACCTACACCTCTGACTTTACGGGGGGCTGTCCCCCACTACCTCTCTGAAAAAAGTTAGCTTACAGCTCCAGTTAATAATTCCTGGGTGTGACAGTGTTTAACCTACAAACTCCTTTGGAAATCCTCTAGCCTGCCTGAA…	intergenic	gene-TBL1XR1(dist=853156),gene-NAALADL2(dist=366923)
1	101000000	101135299	T	TAGTCAGGTGCGGGGAGCCGGTGAGGCATTCCACTCGTGACAAAGGTTATGAGGAAGGAGGCTCGGCATACGCAAAGGCGGGATCGAGCCTCAGGAGTCCCCCCGGATATTCTCGAGCATTTTCCCCCAAAAAACCAGAGTCTGCCTACTTTATTGCTTTGTGCTCTCACCTCTGACTTTACTGGGGGCTGTCCCCTACCACCATCTCTCTCTCTGTGTGTCAAAGAGTTAACTTACAGCTCCAATTAATAAAGTTCCTGGGCAATTAGGAGTGTTTAAATCCAAACCCCTCTGATGGCTCTCTAACTTGCCTGACAAGTTTACCCGGACTTCTGCAGCTATGCATACGATTGTTTACAGTCTCCCAGGAGAGGCATGGGAAGCTTAAGATATTCAAAT…	intergenic	gene-ZBBX(dist=929035),gene-BCHE(dist=387371)
1	105000000	104924952	G	GTGTGTATATATGCGGGGAGCCGGTGAGGCATTCTGCTCATGACAAAGGTCATGAGGAAGGAGGCTCAGCATACGCAAAGGCGGGATCGAGCCTCAGGAGTCCGCCCGGATATTCTCGAGCATTTTCCCCCAAAAAACCAGAGTCTGCCTACTTTATTGCTTTGTGCTCTCACCTCTGACTTTACTGGGGGCTGTCCCCTACCACCATCTCGCTCTCTCTCTGTCAAAGAGTTAACTTACAGCTCCAATTAATAAAGTTCCTGGGCAATTAGGAGTGTTTAAATCCAAACCCCTCAGATGGCTCTCTAACTCGCCTGACAAGTTTACCCGGACTCCTGCAGCTATGCATACGATTGTTTACAGTCTCCTAGCCTCCAGAGGCACGGGAAGCTTAAGATA…	intergenic	gene-TRNAS-GGA-4(dist=531888),gene-TRNAW-CCA(dist=854377)
1	113000000	112931650	G	GAATCTTTGTTGGGGGCCAGAGTGAGGTACTCCGCCCATGGCAAAGGTCATGAGGAAGGAGGCTCGACATACGCAAAGGCGGGATCGAGCCTCAGGAGTCCCCCTGGAACTCCTCGAGCATCTACCCCCATAACCAGAGCCTGCCTACTTTACTACTTTGTGCTCACCTACACCTCTGACTTTACGGGGGGCTGTCCCCCACCACCTCTTTCGGAGAAGGAGTTAACCTAGAGCTCCAGTCAATAAAAACTCTTGGGTGTGACAAGAGTGTTTTAACCTACAAACTCCTCTGAAGGTTCTCTAGCCTGCCTGACAGGCTCGTCCAGCCACATGTGATTGCTCACAGCCTCCTAACCGTGAGAGGCACGAGATGCTTTAAACCCTCTAAAAACAGGTTCT…	intergenic	gene-TRNAK-UUU-3(dist=86890),gene-TRNAC-GCA-7(dist=223547)
1	113000000	113173926	C	CAGACACTGCCGGGGACCAGCCCCGGCTGATCCAGGGAATTCGAAGCGGGGACGGCGTCAGCGAAGATCAGGAAACAATTGCTTAATTAAACGTTAATTAAGGATATAAAGAGTAATAGAATGAGGATAGCTCAGTAGGAAAATTCAGTGGAGAAGAGAGGCTGAAATAAGGATAGCTCAGTGAGGAAATTCAGTGTAGAAAAGAGGCTGAATAATTCAGCCAGAAGGTAAGAGAAAGAACGACATGGTGAGACCAAGTTTCGGTGAACAAGGCCCACACTTTATTTTCCAAAGTAGTTTTTATACCTTAAGTTATGCATAGAGGATAATGGGGGAAGGGGTAGAGTCATGCAGTAAGCCAGGCTTTCTTCCTGCAAACTTATCATATGCAAAAGTTTA…	intergenic	gene-TRNAC-GCA-7(dist=18658),gene-GPR149(dist=60324)
1	122000000	122111960	CTGAACTTGTTGGGGGCCAGAGTGAGGTACTCCGCCCGTGACAAAGGTCATGAGGAAGGAGGCTCGACATACGCAAAGGCGGGATCGAGCCTCAGGAGTCCCCCTGGAACTCCTCGAGCATCTACCCCCATAACCAGAGCCTGCCTACTTTACTACTTTGTGCTCACCTACACCTCTGACTTTACGGGGGGCTGTCCCCCACCACCTCTTTTGGAGAAGGAGTTAACTTAGAGCTCCAGTTTATAATAATTCCTGGGCGTGACAAGAGTGTTTTAACCTACAAACTCCTCTGAAGGTTCTCTGGCCTGCCTGACAGGCTCGTCCGGCCACATGTGATTGCTCACAGCCTCCCAACCATGAGAGGCACGAGATGCTTTAAACCTTCTAAAAACAGGTTCC…	C	intergenic	gene-PLSCR1(dist=10016),gene-PLSCR4(dist=145785)
1	131000000	131080571	CCCCTACTGCTGGGGACCAGCCCCAGCTGATCCAGGGTATTCGAAGGAGAGACGGCCTAGGCGACTATTTATATGCTAATTAGAGATATAGAGAACAATAGAATGAGGATAGCTCAGTAGGAAAATTCAGTGGAGAAAAGAGGCTGAGTAGCTTGGTTTACGCGGGAGACCAATAAAACTTCAAGACAAGAAGTTTGCACCACTTACGTAGGCCGCAGGCGCCCTCTCGAATAGCGGAAGGTGCCTCACCCTAGACACCTTCTCGAGTGGGTCTTAGAAGCCCAGGCATAATTAGTAAGCGTGGTGGGTTCCGCGCTCCAGATGGAGACTCAGCTGGAAGTTAAAGGGAAGAATGACATGGGGAGACCAAGCGCTGGTGAACAAGGCCCATAGCTTTAT…	C	intergenic	gene-DZIP1L(dist=7656),gene-CLDN18(dist=32305)
1	132000000	131855581	G	GAGTGCGGGGAGCGAGCTCCGCCCCTGGCAAAGGTCATGAGGAAGGAGGCTTGGCATACGCAAAGGCGGGATCAAGCCTCAGGAGTCTCCCTGGAAATTCTCGAGCATATACCCCCAAAACCAGAGTCTGCCTACTTTCTGCTTTGTGCTTTCACCTACACCTCTGACTTTACGGGGGGCTGTTCCCCACTACCTCTCTGAAAAAAGAGTTAGCTTACAGCTCCAGTTAATAATTCCTGGGTGTGACAGTGTTTCAACCTACAAACTCCTTTGGAAATCCTCTAGCCTGCCTGAATAGGTTTTTCCGGCCACATGTGATTGTTCAGAGCCTCCCAACTGTGAGAGGCAGGAGATGTTCTAAACTGTCTAAACACAGATTCTTTTGAGTAGTTAAAAGAT…	intergenic	gene-TRNAG-CCC-7(dist=194974),gene-IL20RB(dist=311802)
1	138000000	138133790	C	CATTTTTTGCTGGGGACCAGCCCCAGCTGATCCAGGGTATTCGAAGGAGAGACGGCCTAGGCGACTATTTATATGCTAATTAGAGATATAAAGAATAATAGAATGAGGATAGCTCAGTAGGAAAATTCAGTGGAGAAAAGAGGCTGAGTAGCTTGGTTTATGCGGGAGACCAATAAAACTTTAAGACAAGAAGTTTGCACCACTTACGTAGGCCGCAGGCGCCCTCTCGAATAGCGGAAGGTGCCTCACCCTAGACACCTTCTCGAGTGGGTCTTAGAAGCCCAGGCATAATTAGTAAGCATGGTGGGTTCCGCGCTCCAGATGGAGACTCAGCTGGAAGTTAAAGGGAAGAATGACATGGGGAGACCAAGCGTTGGTGAACAAGGCCCATAGCTTTAT…	intronic	gene-CPNE4
1	138000000	138318965	TCTGCAATATACTGCCGGGGACCAGCCCCGGCTGATCCAGGGTATTCGAAGGAGAGACGGTGTAGGCGAAGATCAGGAAACAATTGCTTAATTAAACGTTAATTAAGGATATAAAGAGTAATAGAATGAGGATAGCTCAGTAAAATTCAGTGAAGAAAAGAGGCTGAAATAAGGATAGCTCAGTGAGGAAATTCAGTGGAGAAAAGAGGCTGAATAATTCAGCCAGAAGGTAAGAGAAAGAACGACATGGTGAGACCAAGTTTCGGTGAACAAGGCCCGCACTTTATTTTCCAAAGTAGTTTTTATACCTTAAGTTATGCATAGAGGATAATGGGGGAAGGGGTAGAGTCAGGCAGCAAGCCAGGCTTTCTTCCTGCAAACTTATCATATGCAAAAGCT…	T	intronic	gene-CPNE4
1	142000000	141514371	A	AAAATATCTGCGGGGAGCGAGCTCCGCCTCTGGCAAAGGTCATGAGGAAGGAGGCTTGGCATACGCAAAGGCGGGATCAAGCCTCAGGAGTCTCCCTGGAAATTCTCGAGCAATCTACCCCCAAAACCAGAGTCTGCCTACTTTCTGCTTTGTGCTTTCACCTACACCTCTGACTTTACGGGGGGCTGTCCCCCACTACCTCTCTGAAAAAAGAGTTAGCTTATAGCTCCAGTTAATAATTCCTGGGTGTGACAGTGTTTCAACCTACAAACTCCCTTGGAAGTCCTCTAGCCTGCCTGAATAGGTTTTTCCGGCCACATGTGATTGCTCAGAGCCTCCAAACTGTGAGAGGCATGAGATGTTCTAAACTGTCTAAATACAGATTCCTTTGAGCAGTCA…	intergenic	gene-BACE2(dist=27224),gene-FAM3B(dist=36707)
1	143000000	142627166	C	CTCCACTTGCCGGGGACCAGCCCCAGCTGATCCAGGGTATTTGAAGGAGAGACGGCATAGGCGAGGATCAGGATACAATAGCTTCAATTAGATATTAATTAAAGATATAAAGAGTAATATAATAAGGATAGCTCAGTAGGAAAATTCAGTGGAGAAAAGAGGCTGAGTAGCTTGGTTTACTCGGGAGACCAATAAAACTTCAAGACAAGAAGTTTGCACCACTTACGTAGGCCGCAGGCATCCTTCTGTTCTCCCGAAGGAGAGGAGACACTGAGGCCTCCCCGGTCGGATCTTAGAAGCCCAGGCATAATTAGTAAGCATGGTGGGTTCCGCGCTCCAGATGGAGACTCAGCCAGAGTGAGAGAGAGAGCGACATGGGGAGACCAGTATTTCGAGAAA…	intergenic	gene-TFF2(dist=9161),gene-TFF1(dist=2969)
1	146000000	146186272	GTCAGGCAGGCTAGAGAACCTTCAGAGGAGTTTGTAGGTTAAAACACTCTTGTCACACCCAAGAGTTTTTATTGACTGGAGCTCTAGGTTAACTCCTTCTCCGAAAGAGGTGGTGGGGGACAGCCCCCCGTAAAGTCAGAGGTGTAGGTAAGAGCACAAAGTAGTAAAGTAGGCAGGCTCTGGTTATGGGGGTAGACGCTCGGGGATTTCCAGGGGGACTCCTGAGGCTCGATCCCGCCTTTGCGTATGTCGAGCCTCCTTCCTCATGACCTTTGCCATGGGCGGAGTACCTCACTCTGGCCCCCAACATC	G	intronic	gene-DIP2A
1	148000000	147881496	CC	CTGTTGGGGGCCAAAGTGAGGTACTCCGCCCATGACAAAGGTCATGAGGAAGGAGGCTCGACATACGCAAAGGCGGGATCGAGCCTGAGGAGTCCCCCTGGAAATCCTCGAGCGTCTACCCCCATAACCAGAGCCTGCCTACTTTACTACTTTGTGCTCTTACCTACACCTCTGACTTTACGGGGGGCTGTCCCCCACCACCTCTTTCAGAGAAGGAGTTAACCTAGAGCTCCAGTCAATAAAAACTCTTGGGTGTGACAAGAGTGTTTTAACCTACAAACTCCTCTGAAGGTTCTCTAGCCTGCCTGACAGGCTCGTCCGGCCACATGTGATTGCTCACAGCCTCCCAACCGTGAGAGGCACAAGATGCTTTAAACCCTCTAAAAACGGGTTCCTTAG…	intergenic	gene-RUNX1(dist=636766),gene-SETD4(dist=434539)
1	152000000	152161307	ACTCTGGTTTTTTGGGGGGTAGATGCTCTAGAATATCCGGGGGGAATTCCTGAGGCTTGATCCTTCCTTTGCGTATGCTGAGCCTCCTTCCTCATGACCTTTGTCACGAGTGGAATGCCTCACTGGCTCCCGGCATATATATATATATATACACACATACATATATATGAATAACTGTATCACTTTGCTATATGCCAGAAACCAACACAACACTATAAATCAACTCTAGTTCAATTTTTTAAAGAATACTATTACCTCCATCATGTTTTTTTCACCTAATTTTTACTCTATATTGGAGTATGTTTGATTAACAGTGTGTGTTAGTAACAGAGTGTGTTAGTTTCCAGTGTACAGCAGTGACTCAGTTATACATATGCATATATCTGCTCTTTTGTTAAT…	A	intronic	gene-LOC112448102
1	157000000	156511089	T	TCCATCCTGTGGGGAGCGAGCTCCGCCCGTGGCAAAGGTCATGAGGAAGGAGGCTTGACATACGCCAAGGGGGGATCGAGCCTCAGGAGTCTCCCTGGAAATTCTCGAGCAATCTACCCCCAAAACCAGAGTCTGTCTACTTTCTGCTTTGTGCTTTCACCTACACCTCTGACTTTACGGGGGGCTGTCCCCCACTACCTCTCTGAAAAAAAAGTTAGCTTACAGCTCCAGTTAATAATTCCTGGGTGTGACAGTGTTTAACCTACAAACTCCTTTGGAAATCCTCTAGCCTGCCTGAATAGGTTTTTCCGGCCACATGTGATTGTTCAGAGCCTCCCAACTGTGAGAGGCAGGAGATGTTCTAAATTGTGTAAACACAGATTCTTTTGAATAGTTAAA…	intronic	gene-KCNH8
2	672617	673741	TACATAATTGCCGAGGACCAGCCCCGGCTGATTCAGGGTATTCGAAGGAGAGACGGCATAGGCGAAGATCAGGAAACAATTGCTTAATTAAATGTTAATTAAGGATATAAAGAGTAATAGAATGAGGATAGCTCAGTAGGAAAATTCAGTGGAGAAAAGAGGCTGAAATAAGGATAGCTCAGTGAGGAAATTCAGTGGAGAAAAGAGGCTGAATAATTCAGCCAGAAGGTAAGAGAAAGAACGACATGGTGAGACCAAGTTTCGGTGAACAAGGCCCGCACTTTATTATCCAAAGTAGTTTTTATACCTTAAGTTATGCATAGAGGATAATGGGGGAAGGGGTAGAGTCTTGCAGCAAACCAGGCTTTCTTCCTGCAAACTTATCATATGCAAAAGCTT…	T	intronic	gene-OCA2
2	1420785	1420785	T	TAACTGATGCTGGGGGCCAGCCCCAGCTGATCCAGGGTATTCGAAGGAGAGACGGTCTAGGCGACTATTTATATGCTAATTAGAGATATAAAGAATAATAGAATGAGGATAGCTCAGTAGGAAAATTCAGTGGAGAAAAGAGGCTGAGTAGCTTGGTTTACGCGGGAGACCAATAAAACTTCAAGACAAGAAGTTTGCACCACTTACGTAGGCCGCAGGCGCCCTCTCGAATAGCGGAAGGTGCCTCACCCTAGACACCTTCTCGAGTGGGTCTTAGAAACCCAGGCATAATTAGTAAGCGTGGTGGGTTCCGCGCTCCAGATGGAGACTCAGCTGGAAGTTAAAGGGAAGAATGACATGGGGAGACCAAGCGTTGGTGAGCAAGGCCTGTAGCTTTAT…	intergenic	gene-PTPN18(dist=67583),gene-AMER3(dist=48153)
2	5396818	5397061	GGCCACTGCTGAGTTTTCCAGATTTGCTGGCATATTGAGTGCAGCACTTTCACAGCATCATCTTTCAGGATTTGAACTAGCTCAACTGGAATGCCATCACCTCCACTAGCTTTGTTCATAGTGATGCTTCCTAAGGCCCACTTGACTTCACATTCCAGAATGTCTGGCTCTAGGTGAGTGATCACACCATCATGGTTATCTTGGTCATGAAGATCTTTTTTGTATAGTTTTTCTGTGCATTCTT	G	intergenic	gene-CYP27C1(dist=77430),gene-LOC524236(dist=15857)
2	6505580	6506708	TGTCCTCTGCGGGGAGCGAGCTCCGCCCCTGGCAAAGGTCATGAGGAAGGAGGCTTGGCATACGCAAAGGCGGGGATCAAGCCTCAGGAGTCTCCCTGGAAATTCTCGAGCAATCTACCCCCAAAACCAGAGTCTGCCTACTTTCTGCTTTGTGCTTTCACCTACACCTCTGACTTTACGGGGGGCTGTCCCCCACTACCTCTCTGAAAAAAGAGTTAGCTTACAGCTCCAGTTAATAATTCCTGGGTGTGACAGTGTTTCAACCTACAAACTCCTTTGGAAATCCTCTAGCCTGCCTGAATAGGTTTTTCCGGCCACATGTGATTGTTCAGAGCCTCCCAACTGTGAGAGGCAGGAGATGTTCTAAACTGTCTAAACACAGATTCTTTTGAGTAGTTA…	T	intronic	gene-PMS1
2	10739818	10743472	TGCCGGGGACCAGCCCCAGCTGATCCAGGGTATTCGAAGGAGAGACGGCATAGGCGAGGATCAGGATACAATAGCTTCAATTAGATATTAATTAAAGATATAAAGAGTAATAGAATAAGGATAGCTCAGTAGGAAAATTCAGTGGAGAAAAGAGGCTGAGTAGCTTGGTTTACGCGGGAGACCAATAAAACTTCAAGACAAGAAGTTTGCACCACTTACGTAGGCCGCAGGCGTCCTTCCGTTCTCCCGAAGGAGAGGAGACACTGAGGCCTCCCCAGTTGGATCTTAGAAGCCCAGGCATAATTAGTAAGCATGGTGGGTTCCGCGCTCCAGATGGAGACTCAACCAGAGTGAGAGAGAGAGCGACATGGGGAGACCAGTATTTCGAGAAACTGATCC…	T	intergenic	gene-FSIP2(dist=34527),gene-ZNF804A(dist=828602)
2	15853378	15853378	C	CATTAACTGCCGGGGACCAGCCCCGGCTGATCCAGGGTATTCGAAGGAGAGACGGCATAGGCGAGGATCAGGATACGATAGCTTCAATTAGGTATTAATTAAAGATATAAAGAGTAATAGAATAAGGATAGCTCAGTAGGAAAATTCAGTGGAGAAAAGAGGCTGAGTAGCTTGGTTTACGCGGGAGACCAATAAAACTTCAAGACAAGAAGCTTGCACCACTTACGTAGGCCGCAGGCGTCCTTCCGTTCTCCCGAAGGAGAGGAGACACTGAGGCCTCCCCGGTCGGATCTTAGAAGCCCAGGCATAATTAGTAAGCATGGTGGGTTCCGCGCTCCAGATGGAGACTCAGCCAGAGTGAGAAAGAGAGCGACATGGGGAGACCAGTATTTCGAGAAA…	intergenic	gene-TRNASTOP-UCA(dist=114890),gene-CWC22(dist=960309)
2	19019823	19021124	ACAATATACTGCCGGGAGCCGGTGAGGCATTCCACTCGTGACAGAGGTCATGAGGAAGGAGGCTCGGCATACGCAAAGGCGGGATCGAGCCTCAGGAGTCCACCCGGGTATTCTCGAGCATTTTCCCCCCCAAAAAACCAGAGTCTGCCTACTTTATTGCTTTGTGCTCTCACCTCTGACTTTACTGGGGGCTGTCCCCTACCACCATCTCTCTCTCTCTCTGTCAAAGAGTTAACTTACAGCTCCAATTAATAAAGTTCCTGGGCAATTAGGAGTGTTTAAATCCAAACCCCTCAGATGGCTCTCTAACTCGCCTGACAAGTTTACCCGGACTCCTGCAGCTATGCATACAATTGTTTACAGTCTCCTAGCCTCCAGAGGCACGGGAAGCTTAAGATA…	A	intronic	gene-PDE11A
2	21279702	21280920	GAGACCACTGCCGGGGACCAGCCCCGGCTGAACCAGGGTATTCGAAGGAGAGACGGCGTAGGCGAAGATCAGGAAACAATTGCTTAATTAAATGTTAATTAAGGATATAAAGAGTAATAGAATGAGGATAGCTCAGTAAAATTCAGTGAAGAAAAGAGGCTGAAATAAGGATAGCTCAGTGAGGAAATTCAGTGGAGAAAAGAGGCTGAATAATTCAGCCAGAAGGTAAGAGAAAGAACGACATGGTGAGACCAAGTTTCGGTGAACAAGGCCCGCACTTTATTTTTCAAAGTAGTTTTTATACCTTAAGTTATGCACAGAGGATAATGGGGGAAGGGGTAGAGTCTTGCAGCAAACCAGGCTTTCTTCCTGCAAACTTATCATATGCAAAAGCTTAGG…	G	intergenic	gene-LNPK(dist=275052),gene-ATP5MC3(dist=407286)
2	27062408	27062408	G	GGGAAGCTGCAGGGGACCAGCCCCGGCTGATCCAGGGTATTCGAAGGAGAGACGGCGTAGGCGAAGATCAGGAAACAACTGCTTAATTAAATGTTAATTAAGGATATAAAGAGTAATAGAATGAGGATAGCTCAGTGAGGAAATTCAGTGGAGAAAAGAGGCTGAAATAAGGATAGCTCAGTGAGGAAATTCAGTGGAGAAAAGAGGCTGAATAATTCAGCCAGAAGGTAAGAGAAAGAACGACATGGGGAGACCAAGTTTCGGTGAACAAGGCCCGCACTTTATTTTCCAAAGTAGTTTTTATACCTTAAGTTATGCATAGAGGATAATGGGGGAAGGGGTAGAGTCAGGCAGCAAGCCAGGCTTTCTTCCTGCAAACTTATCATATGCAAAAGCTTA…	intergenic	gene-LRP2(dist=31291),gene-DHRS9(dist=5796)
2	30288672	30289970	TAAAGTCTGCCGAGGTCCAGCCCTGGCTGATCCAGGGTATTCGAAGGGGAGACGGAGTCGGCGACCTATTCAAATGGTAATTAGAGATATAAAGAGTAATAGAATGAGGATAGCTCAGTAGGAAAATTCAGTGGAAAAGAGGCTGAGTAGCTTGGTTTATGCGGAAAATCAATATAACCCGTGACACCAGGTTAGCTCTGACCACGGAGGCCACAGGGGCCCTCTCGAATAGCGGAAGGTGCCCCACCTTAGACACCTTCTCAAGTGGGTCTTAGAAGCCCAGGCAAATAAATGGTCGCAGAGGACCTCCGCGCTCCAGATGGAGACTTTAGCCAGAAGTTAAAGCAAAGAATGACATGGGGAGACCAAGCGTTGGTGAGCAAGGCCCGTAGCTTTATT…	T	intronic	gene-SCN1A
2	38677579	38678875	GGCAAAGTGCGGGGAGCCGGTGAGGCATTCCACTCATGACAAAGGTCATGAGGAAGGAGGCTCGGCATACGCAAAGGCGGGATCGAGCCTCAGGAGTCCCCCCGGATATTCTCGAGCATTTTCCCCCAAAAAACCAGAGTCTGCCTACTTTATTGCTTTGTGCTCTCACCTCTGACTTTACTGGGGGCTGTCCCCTACCACCATCTCTCTCTCTCTGTCAAAGAGTTAACTTACAGCTCCAATTAATAAAGTTCCTGGGCAATTAGGAGTGTTTAAATCCAAACCCCTCAGATGGCTCTCTAACTCGCCTGACAAGTTTACCCGGACTCCTGCAGCTATGCATACGATTGTTTACAGTCTCCTAGCCTCCAGAGGCACGGGAAGCTTAAGATATTCAAA…	G	intergenic	gene-ACVR1(dist=79683),gene-ACVR1C(dist=74480)
2	39609885	39609885	G	GAGATACCTGCCGGGAGCCGGTGAGGCATTCCACTCGTGACAAAGGTCATGAAGAAGGAGGCTCGGCATACGCAAAGGCGGGATCGAGCCTCAGGAGTCCGCCCGGATATTCTCGAGCATTTTCCCCCAAAAAACCAGAGTCTGCCTACTTTATTGCTTTGTGCTCTCACCTCTGACTTTACTGGGGGCTGTCCCCTACCACCATCTCGCTCTCTCTCTGTCAAAGAGTTAACTTACAGCTCCAATTAATAAAGTTCCTGGGCAATTAGGAGTGTTTAAATCCAAACCCCTCAGACGGCTCTCTAACTCGCCTGACAAGTTTACCCGGACTCCTGCAGCTATGCATACGATTGTTTACAGTCTCCTAGCCTCCAGAGGCACGGGAAGCTTAAGATATTC…	intergenic	gene-TRNAC-ACA-7(dist=307043),gene-GPD2(dist=37582)
2	42102736	42103911	TATATATTGCCGGGGACCAGCCCCGGCTGAACCAGGGTATTCGAAGGAGAGACGGCGTAGGCGAAGATCAGGAAACAACTGCTTAATTAAACGTTAATTAAGGATATAAAGAGTAATAGAATGAGGATAGCTCAGTGAGGAAATTCAGTGGAGAAAAGAGGCTGAGTAATTCAGCCAGAAGGTAAGAGAAAGAACGACATGGTGAGACCAAGTTTCGGTGAACAAGGCCCGCACTTTATTTTTCAAAGTAGTTTTTATACCTTAAGTTATGCACAGAGGATAATGGGGGAAGGGGTAGAGTCTTGCAGCAAACCAGGCTTTCTTCCTGCAAACTTATCATATGCAAAAGCTTAGGTGATTTGCATCATCTTCTGGCCCGGAGGCCTGTTAACATTTTAA…	T	intronic	gene-GALNT13
2	46178582	46179809	TAGTTATTGCCGGGAGCCGGCATATTGCATATTGAGTGCATATTGCATATTGAGTGCAGCACTTTTCAGGATCTGGAATAGCTCAACTGGAAATTCTATCACTGCCGGTAGCCAGCGTGAGGAACTCCGCCCATGACAAAGGTCATGAGGAAGGAGGCTCGGCATACGCAAAGGCGGGATCGAGCTTCAGGAGTCCCCCTGGAAATTCTCGAGCATATACCCCCAAAACCAGAGTCTGCCTACTTTCTGCTTTGTGCTTTCACCTACACCTCTGACTTTACGGGGGGCTGTCCCCCACTACCTCTCTGAAAAAAGTTAGCTTACAGCTCCAGTTAATAATTCCTGGGTGTGACAGTGTTTAACCTACAAACTCCTTTGGAAATCCTCTAGCCTGCCTGA…	T	intergenic	gene-RND3(dist=458902),gene-MMADHC(dist=369935)
2	55714151	55723012	GTTCCCCTGCCGGGGACCAGCCCCGGCTGATCCAGGGTATTCGAAGGAGAGACGGCATAGGCGAGGATCAGGATACAATAGCTTCAATTAGATATTAATTAAAGATATAAAGAGTAATAGAATAAGGATAGCTCAGTAGGAAAATTCAGTGGAGAAAAGAGGCTGAGTAGCTTGGTTTACACGGGAGACCAATAAAACTTCAAGACAAGAAGTTTGCACCACTTACGTAGGCCGCAGGCGTCCTTCCGTTCTCCCGAAGGAGAGGAGACACTGAGGCCTCCCCGGTCGGACCTTAGAAGCCCAGGCATAATTAGTAAGCATGGTGGGTTCCGCGCTCCAGATGGAGACTCAGCCAGAGTGAGAGAGAGAGCGACATGGGGAGACCAGTATTTCGAGAAA…	G	intergenic	gene-KYNU(dist=1854912),gene-TRNAC-GCA-15(dist=132568)
2	56976351	56976351	G	GAAATATTGCCGGGAGCCGGCATATTGCATATTGAGTGCATATTGCATATTGAGTGCAGCACTTTTCAGGATCTGGAATAGCTCAACTGGAAATTCTATCACTGCCGGTAGCCAGCGTGAGGAACTCCGCCCATGACAAAGGTCATGAGGAAGGAGGCTCGGCATACGCAAAGGCGGGATCGAGCTTCAGGAGTCCCCCTGGAAATTCTCGAGCATATACCCCCAAAACCAGAGTCTGCCTACTTTCTGCTTTGTGCTTTCACCTACACCTCTGACTTTACGGGGGGCTGTCCCCCACTACCTCTCTGAAAAAAGTTAGCTTACAGCTCCAGTTAATAATTCCTGGGTGTGACAGTGTTTAACCTACAAACTCCTTTGGAAATCCTCTAGCCTGCCTGA…	intergenic	gene-LRP1B(dist=189352),gene-LOC101906569(dist=1344408)
2	60285887	60287176	CACCTGATGCGGGGAGCGAGCTCCGCCTCTGGCAAAGGTCATGAGGAAGGAGGCTTGGCATACGCAAAGGCGGGATCAAGCCTCAGGAGTCTCCCTGGAAATCCTCGAGCGTCTACCCCCATAATCAGAGCCTGCCTACTTTACTACTTTGTGCTCTTACCTACACCTCTGACTTTACAGGGGGCTGTCCCCCACCACCTCTTTTGGAGAAGGAGTTAACCTAGAGCTCCAATCAATAAAAACTCTTGGGTGTGACAAGAGTGTTTTAACCTACAAACTCCTCTGAAGGTTCTCTAGCCTGCCTGACAGGCTTGTCCGGCCACATGTGATCGCTCACAGCCTCCCAACCGTGAGAGGCACAAGATGCTTTAAACCTTCTAAAAACAGGTTCCTTAGAAA…	C	intronic	gene-THSD7B
2	66136799	66136799	T	TATAAATACTCGCCTGACAAGTTTACCCGGACTCCTACAGCTATGCATACGATTGTTTACAGTCTCCCAGCCTCCAGAGGCACGGGAAGCTTAAGATATTCAAATAGCTTAGAGCCTCTCAGAGAGTTAGAAACTGTCAGAATAAACTAGTAAAGGATTTCATTGATGAGCTAATGCTTGTTGCCAAGTTTTCACATCCCCTGAATTGTATCCTTGAATGTGTATTAATTAATAGTTGGTATGTAGAAAAAATAAGTAGTGGCCTTGGTGTTAGTAACTTTAGACCCCTAAGGCAATAAATTCTTTCCTTTGTTGTAAACCCATTACACATCCACCCTATAGGAATGCAATTTTATCTTCGGAAGATGGCGCCAAACCTTAAAATAATTACTCTTAGAG…	intergenic	gene-ACTR3(dist=566806),gene-DPP10(dist=820341)
2	66136799	66136799	T	TATAAATACTCGCCTGACAAGTTTACCCGGACTCCTACAGCTATGCATACGATTGTTTACAGTCTCCCAGCCTCCAGAGGCACGGGAAGCTTAAGATATTCAAATAGCTTAGAGCCTCTCAGAGAGTTAGAAACTGTCAGAATAAGACTAGTAAGGGATTTCATTGATGAGTCAATGTTTGTTGCCAAGTTTTCACATCCCCTGAATTGTATCCTTGAATGTGTATTAATTAATAGTTGGTATGTAGAAAAAATAAGTAGTGGCCTTGGTGCCTTAAGGCAATAAATTCTTTCCTTTGTTGTAAACCCATTACACATCCACCCTATAGGAATGCAATTTTATCTTCGGAAGATGGCGCCAAACCTTAAAATAATTACTCTTAGAGAAAATAAGTTTTTG…	intergenic	gene-ACTR3(dist=566806),gene-DPP10(dist=820341)
2	67497778	67499082	CCTGAGGTGTTGGGGGCCAGAGTGAGGTACTCCGCCTGTGACAAAGGTCATGAGGAAGGAGGCTCGACATACGCAAAGGCGGGATCGAGCCTCAGGAGTCCCCCTGGAAATCCTCGAGCGTCTACCCCCATAACCAGAGCCTGCCTACTTTACTACTTTGTGCTCTTACCTACACCTCTGACTTTACGGGGGGCTGTCCCCCACCACCTCTTTCGGAGAAGGAGTTAACCTAGAGCTCCAGTTTATAATAATTCCTGGGCGTGATAAGAGTGTTTTAACCTACAAACTCCTCTGAAGGTTCTCTAGCCTGCCTGACAGGCTCGTCTGGCCACATGTGATTGCTCACAGCCTCCCAACCGTGAGAGGCACAAGATGCTTTAAACCCTCTAAAAACGGGTT…	C	intronic	gene-DPP10
2	68670673	68670673	T	TGACTCCTGCAGTAGCCCCGTCAGTCTTGCCAGGATCTCGATGTTTATCTTGCCTCCCCTTCCGGCGGGCTCCTCTTTTGTGATCGAAGCAATGGGGGAACTGGATGTCTGGGGGTCTGCAACATGGCGAATCAACCTGTCTTGGATCTAAATTGGAGAATCTGCATCCTGTGGAAAAATACAAGCACATCCTCGACCGCTAGTTAATAAGGGGTCAGGACCCTTCCATTGTCCTGAGAGAAGGTCCTTCCATTTGACTAACGGTTTTGCATTTAATTGCTCCAGGCACCAATGACGAAGCATTGCAGTAATTCTAGCCAGATCAGTATTTAGAATATTTATTACGAAAAGAGCAAATATTTATTACGAAAAGAGCATGTTGCAAGATTTGATGGGGAG…	intergenic	gene-DPP10(dist=913979),gene-DDX18(dist=825586)
2	74833365	74833365	C	CATCAGGCACTCTATCTATCAGATCTAGGCCCTTAAATCTATTTCTCACTTCCACTGTATAATCATAAGGGATTTGATTTAGGTCATACCTGAATGGTCTAGTGGTTTTCCCTACTTTCTTCAATTTCAGTCTGAATTTGGTAATAAGGAGTTCATGATCTGAGCCACAGTAGTGGAGGTGATGGAATTCTAGTTGAGCTATTTCAAATTCTGAAAAATGATGCCGTGAAAGTGCTGCACTCAATATGCTAGCAAATTTGGAAACCTCAGCAGT	intergenic	gene-LOC784679(dist=604805),gene-CNTNAP5(dist=1054923)
2	74900728	74900729	AC	AAATGCTTTTGCTATGTTTGCAGATGAGGAATTTAACCTTTATTCTGATTCTCAGTATATTGTCAGGTTGTTTCCATACACTGAAACAGCGGTTTTTGTCTGAAAATAAAACTACCATATTTCATTTGTTAACTAAATTACAGCAACAAATTTGGAAAAGAAATAAAATATTTTTCATTGGACACATTTGGGCTCATTCCAGATTGCCCGGCCCTTAAAATGCCTTTAATGATTTGGCTAACTTGTTAACCAGAAATACAGTGGCCACTGTGATTGAGGAGGCCAGAGCCTCTCACTCACTTCATCATCAATATGCTACTGCTTT	intergenic	gene-LOC784679(dist=672168),gene-CNTNAP5(dist=987559)
2	74900736	74900737	TC	TTGCTATGTTTGCAGATGAGGAATTTAACCTTTATTCTGATTCTCAGTATATTGTCAGGTTGTTTCCATACACTGAAACAGCGGGTTTTGTCTGAAAATAAAACTACCATATTTCATTTGTTAACTAAATTACAGCAACAAATTTGGAAAATAAATAAAATATTTTTCATTGGACACATTTGGGCTCATTCCAGATTGCCCGGCCCTTAAAATGCCTTTAATGATTTGGCTAACTTGTTAACCAGAAATACAGTGGCTACTGTGATTGAGGAGGCCAGAGCCTCTCACTCACTTCATCATCAATATGCTACTGCTTTAAGGTATCAATTCCAAATTCCCAGAGAGACTGCTCGAGAAATTGTGCGTTCTTGCCTACACTGCCCCACTGTTTATAGTAGT…	intergenic	gene-LOC784679(dist=672176),gene-CNTNAP5(dist=987551)
2	74900752	74900755	AGGC	AAATTAAAAGAAGGGGAGTTTAAGTATAGTTCTCCCCATCAAATCTTGCAACATGCTCTTTTCGTAATAAATATTCTAAATACTGATCTGGCTGGAACTACTGCAATGCTTCGTCATTGGTGCCTGGAGCAATTAAATGCAAAACCGTTAGTCAAATGGAAGGACCTCCTCTCAGGACAATGGAAGGGTCCCGACCCCTTATTAACTAGCGGTGGAGGATGCGCTTGTATTTTTCCACAGGATGCAGATTCTCCAGTTTACATCCGGGAGAGGCTGATTCGCCATGTTGCAGACCCCCAGACATCCAGTTCCCCATTGCTTCGATCACAAAAGAGGAGCCCACCAGAAGGGGAGGCAAGATAAACATCGAGATCCCAGCATGACCGACGGGGCTGCTGC…	intergenic	gene-LOC784679(dist=672192),gene-CNTNAP5(dist=987533)
2	74900764	74900765	CT	CGAGAAATTGTGCGTTCTTGCCTACACTGCCCCACTGTTTATAATAGTCTACCTATGGGAGTTAATCCTCGCGGTCTCAAACCTAACGTACTCTGGCAAATGGATGTAACTCATGTCTCTTCATTTGGAAAACTGTCCTTTGTTCATGTAACTGTAGACACCTTTTCTCATGTTATTATTGCAACTGTTCATACAGGGGAAGCAATTAAAGATGTAATACAACATCTCTTTACTTGCTTTTCATATTTGAGCCTGCTAAAATCTTTGAAAACTGACAATGCTCCTGCTTACACTTCTAAGTCTTTTCAGGAATTTTGTATAAAGTTTCAAATTAAACATAATACAGTCATCCCTTATAATCTCCAGGGACAAGCCATTGTGGAAAGAGCACATCAAACA…	intergenic	gene-LOC784679(dist=672204),gene-CNTNAP5(dist=987523)
2	74900774	74900776	TAA	TGGAACAGCTCTGACATTGGCCTGGACTTAGGGAAACTTCATAATCAAATACAGACCCTGGAACACTCTCGACTGGATTTTACCGCCGCTGGAGCAGCTAATGACTTATTTCACACCTTCTCTAACTTTATTTCTGGAAAAAACATTCTGTCTAATATCTTTAGTTCTAATTTTGCTTCTCATAATCATTCTTCCTTGTATTGTCAGGATTCTTCGGCAGAACATTCAGAAGCTCGCGACTGAGCTGCATCTGGCTGTTTTAAGCAATAAAAAAGGGGGAGATGCTGGGAGCCGGCATATTGCATATTGAGAGCATATTGCATATTGAGTGCAGCACTTTCCACAGCATCATCTTTCAGGATCTGGAATAGCTCAACTGGAATTCTATCACTGCTGGGA…	intergenic	gene-LOC784679(dist=672214),gene-CNTNAP5(dist=987512)
2	74900786	74900786	C	CACAAAAGAGGAGCCCACCAGAAGGGGAGGCAAGATAAACATCGAGATCCCAGCATGACCGACGGGGCTGCTGCAGCGCGAACTCCAACCAGAAAATAATTCTACTTATTCTGTTTTGGCTAGTCTACCCTCTCCTTATGTTTTTCTCTTTACCAGTGATTCTGGAAAACTTAATGTACATGTGACTTTCACTGGTGGACCCAATGCAGTGACTTGTGAACAATGCATGCTCTCATCTTGTTTAAACCCTCAATATAATGTTTGCTCCTTTGTAGTGTTACAACGTCCACCTTATCTTATGATGTAACCGCTTATTGATATAACTATAGTCTTGCTGTGTTACAACAACTACAAGATTTAATTGATCACGACGATTTG	intergenic	gene-LOC784679(dist=672226),gene-CNTNAP5(dist=987502)
2	74900797	74900797	T	TATTTTAGGAATATCAGCTTTGACAGCAGCAATTACTTCTGTTACTGCAGCAGCAATATCATTGACTCAACAGGTGCATACTGCCCAATATGTTGATACTATGCCTAAAAACGTCTCTTTAATTCTAGCAACACAGGAAGCTATAGATAGAAAGTTGGAGATGAGAATAGATGCCTTGAAAGAGGCAGTAATGCATATTGGGACTGAGTTACAGGCTTTAATAGTGAAAATGGCTCTGTCTTGCCACGCTGATTACCGGTGGATATGGTGACATCTTTAAAGGTAAACGAGACAGATTATAAATGGGAAAAAAATTACAAATCACATTTCAGGTGTTTGGAACAGCTCTGACATTGGCCTGGACTTAGGGAAACTTCATAATCAAATACAGACCCTGGA…	intergenic	gene-LOC784679(dist=672237),gene-CNTNAP5(dist=987491)
2	74900813	74900814	AA	ATTCTATCACTGCTGGTAGCCAGCGTGAGGAACTCCGCCCATGACAAAGGTCATGAGGAAGGAGGCTCGGCAAACGCAAAGGCGGGATCGAGCCTCAGGAGTCCCCCATCTACCCCCAAAACC	intergenic	gene-LOC784679(dist=672253),gene-CNTNAP5(dist=987474)
2	74900827	74900828	CA	CTTTCTGCTTTGTGCTTTCACCTACACCTCTGACTTTAGGGGGGGCTGTCCCCCACTACCTCTCTCTGAAAAAAGAGTTAGCTTACAGTTCCAGTTAGTAATTCCTGGGTGTGACAGTGTTTAACCTACAAGCTCCTTTGGAAATCCTCTAGCCTGCCTGAATAGGTTTTTCTGGCCACATGTGATTGTTCAGAGCCTCCCAACTGTGAGAGGCAGGAGATGTTCTAAACTGTCTAAACACAGATTCTTTTGAGTAGTTAAAAGATTGATTAGAAATTGTATTGGTGAAGGGATTTTCACTTGTTGGGCCAATGTTTGCTGCTAAGTTTCCATATCCCTCACCTGCTGTGTCCCTGGCAGTGTATTGATTAATATAATTGGTATAAGTAGTAGCTTTAA…	intergenic	gene-LOC784679(dist=672267),gene-CNTNAP5(dist=987460)
2	74900836	74900837	AG	AATGCAACTTTATCTAATGCTTTTGGAGGGTGGCTCCTGACCAATCACCTTTAGAGAAAAATAAGTTTTCTGAAGAAAGGGTCTTAAAATGTTAACAGGCCTCCGGGCCAGAAGATGATGCAAATCACCTAAGCTTTTGCATATGATAAGTTTACAGGAAGAAAGCCTGGCTTACTGCATGACTCTACCCCTTCCCTCATTATCCTCTATGCATAACTTAAGGTATAAAAACTACTTTGGAAAATAAAGTGCGGGCCTTGTTCACCGAAACTTGGTCTCACCATGTCGTTCTTTCTCTTACCTTCTGGCTGAATTATTCAGCCTCTTTTCTCCACTGAATTTCCTCACTGAGCTATCCTCATTCTATTACTTTTTATATCCTTAATTAACGTTTAATTA…	intergenic	gene-LOC784679(dist=672276),gene-CNTNAP5(dist=987451)
2	75328701	75328701	G	GGTGGATTGTTGGGGGCCAGAGTGAGGTACTCCGCCCATGGCAAAGGTCATGAGGAAGGAGGCTCGACATACGCAAAGGCGGGATCGAGCCTCAGGAGTCCCCCTGGAACTCCTCGAGCATCTACCCCCATAACCAGAGCCTGCCTACTTTACTACTTTGTGCTCACCTACACCTCTGACTTTACGGGGGGCTGTCCCCCACCACCTCTTTCGGAGAAGGAGTTAACCTAGAGCTCCAGTCAATAAAAACTCTTGGGTGTGACAAGAGTGTTTTAACCTACAAACTCCTCTGAAGGTTCTCTGGCCTGCCTGACAGGCTCGTCCGGCCACATGTGATTGCTCACAGCCTCCCAACCATGAGAGGCACGAGATGCTTTAAACCTTCTAAAAACAGGTTCC…	intergenic	gene-LOC784679(dist=1100141),gene-CNTNAP5(dist=559587)
2	75357918	75359222	GAGTTTCCTGCCGGGGACCAGCCCCGGCTGATCCAGGGTATTCGAAGGAGAGACGGCATAGGCGAGGATCAGGATACAATAGCTTAATTAAATATTAATTAAAGATATAAAGAGTAATAGAATAAGGATAGCTCAGTAGGAAAATTCAGTGGAGAAAAGAGGCTGAGTAGCTTGGTTTACGCGGGGGACCAATAAAACTTCAAGACAAGAAGCTTGCACCACTTACGTAGGCCGCAGGCGTCCTTCCGTTCTCCCGAAGGAGAGGAGACACTGAGGCCTCCCCGGTCAGATCTTAGAAGCCCAGGCATAATTAGTAAGCATGGTGGGTTCCGCGCTCCAGACGGAGACTCAACCAGAGTGAGAGAGAGAGCGACATGGGGAGACCAGTATTTCGAGAAA…	G	intergenic	gene-LOC784679(dist=1129358),gene-CNTNAP5(dist=529066)
2	78728203	78728261	CCGGCCACATGTGATTGCTCACAGCCTCCCAACCGTGAGAGGCACAAGATGCTTTAAAC	CTT	intergenic	gene-CNTNAP5(dist=1799865),gene-GYPC(dist=156872)
2	80203058	80203058	T	TCTTTTGTGCCGGGGACCAGCCCCGGCTGATCCAGGGTATTCGAAGCGGGGACGGCGTCGGCGAGGATCAGGAAACAACTGCTTAATTAAACGTTAATTAAGGATATAAAGAGTAATAGAATGAGGATAGCTCAGTGAAGAAATTCAGTGGAGAAAAGAGGCTGAAATAAGGATAGCTCAGTGAGGAAATTCAGTGGAGAAAAGAGGCTGAATAATTCAGCCAGAAGGTAAGAGAAAGAACGACATGGTGAGACCAAGTTTCGGTGAACAAGGCCCGCACTTTATTTTCCAAAGTAGTTTTTATACCTTAAGTTATGCATAGAGGATAATGGGGGAAGGGGTAGAGTCCTGCAGTAAGCCAGGCTTTCTTCCTGCAAACTTATCATATGCAAAAGTTTA…	intergenic	gene-TRNAE-UUC-9(dist=102370),gene-NABP1(dist=62889)
2	84978988	84978988	C	CACCTAATGTGGGGAGCGAGCTCCGCCCGTGGCAAAGGTCATGAGGAAGGAGGCTTGACATACGCAAAGGCGGGATCAAGCCTCAGGAGTCTCCCTGGAAATTCTCGAGCAATCTACCCCCAAAACCAGAGTCTGCCTACTTTCTGCTTTGTGCTGTCACCTACACCTCTGACTTTATGGGGGGCTGTCCCCCACTACCTCTCTGAAAAAAGAGTTAGCTTACAGCTCCAGTTAATAATTCCTGGGTGTGACAGTGTTTAACCTACAAACTCCTTTGGAAATCCTCTAGCCTGCCTGAATAGGTTTTTCCGGCCACATGTGATTGTTCAGAGCCTCCCAACTGTGAGAGGCAGGAGATGTTCTAAACTGTCTAAACACAGATTCTTTTGAGTAGTTAAA…	intronic	gene-HECW2
2	85517856	85519154	AACTCCTGTGTTGGGGGCCAGAGTGAGGTACTCCGCCCATGGCAAAGGTCATGAGGAAGGAGGCTCGACATACGCAAAGGCGGGATCGAGCCTCAGGAGTCCCCCTGGAACTCCTCGAGCATCTACCCCCATAACCAGAGCCTGCCGACTTTACTACTTTGTGCTCACCTACACTTCTGACTTTACGGGGGGCTGTCCCCCACCACCTCTTTTGGAGAAGGAGTTAACCTAGAGCTCCAGTCAATAAAAACTCTTGGGTGTGACAAGAGTGTTTTAACCTACAAACTCCTCTGAAGGTTCTCTAGCCTGCCTGACAGGCTCGTCCGGCCACATGTGATTGCTCACAGCCTCCCAACCGTGAGAGGCACGAGATGCTTTAAACCTTCTAAAAACAGGTTC…	A	intergenic	gene-PGAP1(dist=9454),gene-ANKRD44(dist=46376)
2	88748490	88748490	G	GACTTAATGCGGGGAGCGAGCTCCGCCTCTGGCAAAGGTCATGAGGAAGGAGGCTTGGCATACGCAAAGGCGGGATCAAGCCTCAGGAGTCTCCCTGGAAATTCTCGAGCAATCTACCCCCAAAACCAGAGTCTGCCTACTTTCTGCTTTGTGCTTTCACCTACACCTCTGACTTTACGGGGGGCTGTCCCCCACTACCTCTCTGAAAAAAGAGTTAGCTTATAGCTCCAGTTAATAATTCCTGGGTGTGACAGTGTTTCAACCTACAAACTCCCTTGGAAGTCCTCTAGCCTGCCTGAATAGGTTTTTCCGGCCACATGTGATTGCTCAGAGCCTCCAAACTGTGAGAGGCATGAGATGTTCTAAACTGTCTAAATACGGATTCCTTTGAGCAGTCTA…	intergenic	gene-MAIP1(dist=215345),gene-HIST2H3D(dist=3091)
2	94166197	94166197	C	CCACACCTGCCGGGGTCCTGCCCCGGCTGATCCAGGGTATTCGAAGCGGGGACGGTGTCGGTGACCTATTTATTTAAATATTTTATCAAAGATATAAAGAGTAATAGGATGAGGATAGCTCAGTAGGAAAATCCAGTGGAGAAAAGAGGCTGAGTAGCTTGGTTTACGCGGGAGACCAATAAAACTTCAAGACAAGAAGTTTGCACCACTTACGTAGGCCGCAGGCGTCCTTCCGTTCTCCCGAAGGAGAGGAGACACTGAGGCCTCCCCGGTCGGATCTTAGAAGCCCAGGCATAATTAGTAAGCATGGTGGGTTCCGCGCTCCAGATGGAGACTCAACCAGAGGGAGAGAGAGACATGGGGAGACCAGTATTTCGAGAAACTGACCCCAATTCTTTA…	intergenic	gene-NRP2(dist=18241),gene-INO80D(dist=186675)
2	98944498	98944498	T	TGTCTACTGCCGGGGACCAGCCCCGGCTGATCCAGGGTATTCGAAGCGGGGATGGCGTTGGCGAGGATCAGGAAACAATTGCTTAATTAAACGTTAATTAAGGATATAAAGAGTAATAGAATGAGGATAGCTCAGTGAGGAAATTCAGTGGAGAAAAGAGGCTGAAATAAGGATAGCTCAGTGAGGAAATTCAGTGGAGAAAAGAGGCTGAATAATTCAGCCAGAAGGTAAGAGAAAGAACGACATGGTGAGACCAAGTTTTGGTGAACAAAGCCCGCACTTTATTTTCCAAAGTAGTTTTTATACCTTAAGTTATGCATAGAGGATAATGGGGGAAGGGGTAGAGTCATGCAGTAAGCCAGGCTTTCTTCCTGCAAACTTATCATATGCAAAAGTTTA…	intergenic	gene-CPS1(dist=476818),gene-TRNAC-GCA-21(dist=266100)
2	104000000	104122702	C	CAAGCATATTGCATATTGCATATTGAGTGCATAGTGCATATTGCATATTGAGTGCAGCACTTTCCACAGCATCATCTTTCAGGATCTGGAATAGCTCAACTGGAATTCTATCACTGCTGGGAGCCAGTGAAGAACTCCGCCCATGACAAAGGTCATGAGGAAGGAGGCTCGGCACACGCAAAGGCGGGATCGAGCCTCAGGAGTCCCCCTCCAAATTCTCGACCATCTACCCCTAAAACCAGAGTCTGCCTACTTTCTGCTTTGTGCTTTCACCTACACCTCTGACTTTACGGGGGGCTGTCCCCCACTACCTCTCTGAAAAAAGAGTTAGCTTACAGCTCCAGTTAATAATTCCTGGGTGTGACAGTGTTTAACCTACAAACTCCTTTGGAAATCCTC…	intronic	gene-TMEM169
2	105000000	105137892	CACATACTGCCGGGAGCCGGCATATTGCATATTGAGTGCATATTGCATATTGAGTGCAGCACTTTTCAGGATCTGGAATAGCTCAACTGGAATTCTATCACTGCCGGTAGCCAGCGTGAGGAACTCCGCCCATGACAAAGGTCATGAGGAAGGAGGCTCGGCATACGCAAAGGCGGGATCGAGCTTCAGGAGTCCCCCTGGAAATTCTCGAGCATATACCCCCAAAACCAGAGTCTGCCTACTTTCTGCTTTGTGCTTTCACCTACACCTCTGACTTTACGGGGGGCTGTCCCCCACTACCTCTCTGAAAAAAGTTAGCTTACAGCTCCAGTTAATAATTCCTGGGTGTGACAGTGTTTAACCTACAAACTCCTTTGGAAATCCTCTAGCCTGCCTGAA…	C	intergenic	gene-TNP1(dist=276265),gene-TRNAC-ACA-8(dist=727839)
2	108000000	107542259	GGCAACCTGCCGGGAGCCGGCATATTGCATATTGAGTGCATATTGCATATTGAGTGCAGCACTTTTCAGGATCTGGAATAGCTCAACTGGAAATTCTATCACTGCCGGTAGCCAGCGTGAGGAACTCCGCCCATGACAAAGGTCATGAGGAAGGAGGCTCGGCATACGCAAAGGCGGGATCGAGCTTCAGGAGTCCCCCTGGAAATTCTCGAGCATATACCCCCAAAACCAGAGTCTGCCTACTTTCTGCTTTGTGCTTTCACCTACACCTCTGACTTTACGGGGGGCTGTCCCCCACTACCTCTCTGAAAAAAGTTAGCTTACAGCTCCAGTTAATAATTCCTGGGTGTGACAGTGTTTAACCTACAAACTCCTTTGGAAATCCTCTAGCCTGCCTGA…	G	intergenic	gene-STK11IP(dist=5283),gene-SLC4A3(dist=6138)
2	109000000	109134462	CTCAGTGAGGAAATTCAGTGGAGAAAAGAGGCTGAAATAAGGATAGTTCAGTGAGGAAATTCAGTGGAGAAAAGAGGCTAAAATAAGGATAGT	C	intergenic	gene-SLC4A3(dist=1571292),gene-EPHA4(dist=492198)
2	110000000	110014601	CAAGGAGTGCCGGGGACCAGCCCCGGCTGATCCAGGGTATTCGAAGGAGAGACGGCATAGGCGAGGATCAGGATACGATAGCTTCAATTAGGTATTAATTAAAGATATAAAGAGTAATAGAATAAGGATAGCTCAGTAGGAAAATTCAGTGGAGAAAAGAGGCTGAGTAGCTTGGTTTACGCGGGAGACCAATAAAACTTCAAGACAAGAAGTTTGCACCACTTACGTAGGCCGCAGGCGTCCTTCCGTTCTCCCGAAGGAGAGGAGACACTGAGGCCTCCCTGGTCGGATCTTAGAAGCCCAGGCATAATTAGTAAGCATGGTGGGTTCCGCGCTCCAGATGGAGACTCAACCAGAGTGAGAGAGAGAGCGACATGGGGAGACCAGTATTTCGAGAAA…	C	intergenic	gene-EPHA4(dist=335300),gene-PAX3(dist=354952)
2	110000000	110013705	CGGATCTTAGAAGCCCAGGCATAATTAGTAAGCATGGTGGGTTCCGCGCTCCAGATGGAGACTCAACCAGAGTGAGAGAGAGAGCGACATGGGGAGACCAGTATTTCGAGAAACTGATCCCAA	C	intergenic	gene-EPHA4(dist=335586),gene-PAX3(dist=355848)
2	110000000	110014345	AATCACATGTGGCCGGACGAGCCTGTCAGGCAGGCTAGAGAACCTTCAGAGGAGTTTGTAGGTTAAAACACTCTTGT	AG	intergenic	gene-EPHA4(dist=336272),gene-PAX3(dist=355208)
2	112000000	111761167	G	GGACGACTGCGGGGAGCCGGTGAGGCATTCCACTCGTGACAAAGGTCATGAGGAAGGAGGCTCGGCATACGCAAAGGCGGGATCGAGCCTCAGGAGTCCCCCCGGATATTCTCGAGCATTTTCCCCCAAAAAAACCAGAGTCTGCCTACTTTATTGCTTTGTGCTCTCACCTCTGACTTTACTGGGGGCTGTCCCCTACCACCGTCTCTCTCTCTCTGTGTCAAAGAGTTAACTTACAGCTCCAATTAATAAAGTTCCTGGGCAATTAGGAGTGTTTAAATCCAAACCCCTCTGATGGCTCTCTAACTCGCCTGACAAGTTTACCCGGACTCCTGCAGCTATGCATACGATTGTTTACAGTCTCCCAGCCTCGAGAGGCATGGGAAGCTTAAGATATTC…	intergenic	gene-KCNE4(dist=545838),gene-SCG2(dist=7721)
2	118000000	117515923	TATAAAGTGAGGCTCGATCCCGCCTTTGCGTATGCCGAGCCTCCTTCCGGGAGCCGGTGGGACATTCCGCTC	T	intronic	gene-DNER
2	120000000	120026140	GGTAAGCTGCCGGGGTCCAGCCCCAGTGGATCCAGGGAATTCGAAGAGGGGACGGTGTCGGCGAGGATCAGGAAACAACTGCTTAATTAAACGTTAATTAAGGATATAAAGAGTAATAGAATAAGGATAGCTCAGTGAGGAAATTTAGTGGAGAAAAGAGGCTGAATAATTCAGCCAGAAGGTAAGAGAAAGAACGACATGGGGAGACCAAGTTTCGACATGGGGAGACCAAGTTTCGGTGAACAAGGCCCGCACTTTATTTTCCAAAGTAGTTTTTATACCTTAAGTTATGCATAGAGGATAATGGGGGAAGGGGTAGAGTCATGCAGCAAGCCAGGCTTTCTTCCTGCAAACTTATCATATGCAAAAGCTTAGGTGATTTGCATCATCTTCTGGCCC…	G	intergenic	gene-DIS3L2(dist=33185),gene-LOC516378(dist=12373)
2	120000000	120274011	AAATTATTTGTTGGGGGCCAGAGTGAGGTACTCCGCCCGTGACAAAGGTCATGAGGAAGGAGGCTCGACATACGCAAAGGCGGGATCGAGCCTCAGGAGTCCCCCTGGAACTCCTCGAGCATCTACCCCCATAACCAGAGCCTGCCTACTTTACTACTTTGTGCTCACCTACACCTCTGACTTTACGGGGGGCTGTCCCCCACCACCTCTTTTGGAGAAGGAGTTAATTTAGAGCTCCAGTTTATAATAATTCCTGGGCGTGATAAGAGTGTTTTAACCTACAAACTCCTCTGAAGGTTCTCTAGCCTGCCTGACAGGCTCGTCCGGCCACATGTGATTGCTCACAGCCTCCCAACCGTGAGAGGCACAAGATGCTTTAAACCCTCTAAAAACGGGTTC…	A	intergenic	gene-LOC101906781(dist=16684),gene-PHC2(dist=70418)
2	123000000	122733076	TCAGGCCCACTCCTCCCCCTGGTATGGACCTAACAGAAACAGAAGATATTAAGAAGAGGTGGCAAGAATACACAGAACTGTACCAAAAAGATCTTAATGACTCAGATAACCACGATGGTGTGATCACTCACCCAGAGCCAGACATCTTGGAGTCCAAAGTCAAGTGGGCCTTAGGAAGCATCACTATGAACAAAGCTAGTGGAGGTGATGGAATTCCAGCTGAGCTTTTTCAAATCCTAAAAGGTGATGCTGTGAAAGTGCTGCACTCAATATGCCAGCAAATTTAGAAAACTCAGCAGTGGCCACAGGACTGGAAAAGGGCAG	TT	intergenic	gene-SDC3(dist=29974),gene-LAPTM5(dist=74283)
3	4559725	4560871	CCTGTTCAGGCGCCACTTGCCGGGGTCCAGCCCCGGTGGATCCAGGGAATTCGAAGCGGGGACGGCGTCGGAGAGGATCAGGAAACAACTGCTTAATTAAACGTTAATTAAGGATATAAAGAGTAATAGAATAAGGATAGCTCAGTAGGAAAATTCAGTGGAGAAAAGAGGCTGAAATAAGGATAGCTCAGTGAGGAAATTCAGTGGAGAAAAGAGGCTGAATAATTCAGCCAGAAGGTGAGAGAAAGAATGACATGGGGAGACCAAGTTTCGGTGAACAAGGCCCGCACTTTATTTTCCAAAGTAGTTTTTATACCTTAAGTTATGCATAGAGGATAATGGGGGAAGGGGTAGAGTCATGCAGTAAGCCAGGCTTTCTTCCTGCAAACTTATCATATG…	C	intergenic	gene-PBX1(dist=78614),gene-NUF2(dist=1399500)
3	7864175	7865473	AGGAAATTGCTGGGGACCAGCCCCAGCTGATCCAGGGTATTCGAAGGAGAGACGGCCTAGGCGACTATTTATATGCTAATTAGAGATATAAAGAATAATAGAATGAGGATAGCTCAGTAGGAAAATTCAGTGGAGAAAAGAGGCTGAGTAGCTTGGTTTACGCGGGAGACCAATAAAACTTCAAGACAAGAAGTTTGCACCACTTACGTAGGCCGCAGGCGCCCTCTCGAATAGCGGAAGGTGCCTCACTCTAGACACCTTCTCGAGTGGGTCTTAGAAGCCCAGGCATAATTAGTAAGCGTGGTGGGTTCCGCGCTCCAGACGGAGACTCAGCTGGAAGTTGAAGGGAAGAATGACATGGGGAGACCAAGCGTTGGTGAGCAAGGCCCGTAGCTTTAT…	A	intergenic	gene-DUSP12(dist=3591),gene-FCRLB(dist=19159)
3	8312513	8312513	G	GAAGAGGTGCCGGGGACCAGCCCCGGCTGATCCAGGGTATTCGAAGCGGGGACGGCGTCGGCGACCTATTTATTTAAATATTTTATCAAAGATATAAAGAGTACTAGGATGAGGATAGCTCAGTAGGAAAATTCAGTGGAGAAAAGAGGCTGAGTAGCTTGGTTTACGCGGGAGACCAATAAAACTTCAAGACAAGAAGTTTGCACCACTTACGTAGGCCGCAGGCGTCCTTCCGTTCTCCCGAAGGAGAGGAGACACTGAGGCCTCCCCGGTCGGATCTTAGAAGCCCAGGCATAATTAGTAAGCGTGGTGGGTTCCGCGCTCCAGATGGAGACTCAGCCAGAGTGAGAGAGAGAGCGACATGGGGAGACCAGTATTTCGAGAAACTGATCCCAATTC…	downstream	gene-ADAMTS4
3	11183461	11184752	TTGCCGGGGACCAGCCCCAGCTGATCCAGGGTATTCGAAGGAGAGACGGCCTAGGCGACTATTTATATGCTAATTAGAGATATAGAGAACAATAGAATGAGGATAGCTCAGTAGGAAAATTCAGTGGAGAAAAGAAGCTGAGTAGCTTGGTTTACGCGGGAGACCAATAAAACTTCAAGACAAGAAGTTTGCACCACTTACGTAGGCCGCAGGCGCCCTCTCGAATAGCGGAAGGTGTCTCACCCTAGACTCCTTCTCGAGTGGGTCTTAGAAGCCCAGGCATGATTAGTAAGCGTGGTGGGTTCCGCGCTCCAGATGGAGACTCAGCTGGAAGTTAAAAGAAAGAATGACATGGGGAGACCAAGCGCTGGTGAACAAGGCCCGTAGCTTTATTTTTAA…	T	intergenic	gene-LOC513494(dist=56564),gene-LOC785755(dist=9504)
3	11631768	11633059	TCTACACTGCCGGGGACCAGCCCCGGCTGATCCAGGGTATTCGAAGGAGAGACAGCGTAGGCGAAGATCAGGATACAATAGCTTCAATTAGATATTAATTAGAGATATAAAGAGTAATAGAATAAGGATAGCTCAGTAGGAAAATTCAGTGGAGAAAAGAGGCTGAGTGGCTTGGTTTACGCGGGAGACCAATAAAACTTCAAGACAAGAAGTTTGCACCACTTACGTAGGCCGCAGGCGTCCTTCCGTTCTCCCAAAGGAGAGGAGACACTGAGGCCTCCCCGGTCGGATCTTAGAAGCCCAGGCATAATTAGTAAGCACGGTGGGTTCGGCGCTCCAGATGGAGACTCAACCAGAGTGAGAGAGAGAGCGACATGGGGAGACCAGTATTTCGAGAAA…	T	downstream	gene-CD1B5
3	11632460	11632529	TGGGTTTTAGTTAAGGAAAGAATTTACTTAGCCTAAGGTCTAACGTGATTAATATCAAAGGTTAATTCTA	T	intergenic	gene-CD1E(dist=22361),gene-CD1B5(dist=1362)
3	12876056	12876056	C	CAGACCTTGCCGGGAGCCGGTGAGGCATTCCACTCGTGACAAAGGTCACGAGGAAGGAGGCTCGGCATACGCAAAGGCGGGATCGAGCCTCAGGAGTCCGCCTGGATATTCTTGAGCATCTACCCCCCAAAAAAACCAGAGTCTGCCTACTTTATTGCTTTGTGCTCTCACCTCTGACTTTACTGGGGGCTGTCCCCTACCACCATCTCGCTCTCTCTGTCAAAGAGTTAACTTACAGCTCCAATTAATAAAGTTCCTGGGCAATTAGAAGTGTTTAAATCCAAACCCCTCAGATGGCTCTCTAACTCTCCTGACAAGTTTACCCGGACTCCTACAGCTATGCATACGATTGTTTACAGTCTCCCAGCCTCGAGAGGCACAGGAAGCTTAAGATATTCA…	intergenic	gene-FCRL5(dist=7816),gene-LOC100849046(dist=26726)
3	15394098	15395111	TAAGAGTTGGTTAATTAGGGGCCTTGTTCACCGAAACTTGGTCTCACCATGTCGTTCTTTCTCTTACCTTCTGGCTGAATTATTCAGCCTCTTTTCTCCACTGAATTTCCTCACTGAGCTATCCTTATTCCATTACTCTTTATATCCTTAATTAAAGTTTAATTAAGCAGTTGTTTCCTGATCTTCGCCTATGCTGTCTCTCCTTTGAATACCCTGGATCAGCCGGGGCTGGACCCCGGCAGCTGTCCCAGGTCTCAGTTGCAGCATGTGGGACCTTCCGTCTTTGTTCGTCGAGCCATACAGGATCTTCAGCTGTGGCATGCAACCTGGCAGCTGTGGCTCATGGGATCTAGTTCCTCAACCAGGGATTGAATCCAGGCTCCCTGCACTGGGAGAGAG…	T	intronic	gene-GBA
3	16935409	16935697	ACGTATTGTTGAAGCCTGGCTTGGAGAATTTTGAGCATTACTTTACTAGCGTGTGAGATGAGTGCAATTGTGCGGTAGTTTGAGCACTGTTTGGCGTTGCCTTTCTTTGGGATTGGAATGAAAACTGCCCTTTTCCAGTCCTGTGGCCACTGCTGAGTTTTCCAAATTTGCTGGCATATTGAGTGCAGCACTTTCACAGCATCCTCCTTTAGGATTTGAAATAGCTCAACTGGAATTCCATCACATCCACTAGCTTTGTTCGTAGTGATGCTTCCTAAGGCCCACTTGA	AAG	intergenic	gene-S100A7(dist=26246),gene-LOC786350(dist=3005)
3	18377711	18378932	GGGAAGCTGCCGGGAGCCGGCATATTGCATATTGAGTGCATATTGCATATTGAGTGCAGCACTTTTCAGGATCTGGAATAGCTCAACTGGAAATTCTATCACTGCCGGTAGCCAGCGTGAGGAACTCCGCCCATGACAAAGGTCATGAGGAAGGAGGCTCGGCATACGCAAAGGCGGGATCGAGCTTCAGGAGTCCCCCTGGAAATTCTTGAGCATATACCCCCAAAACCAGAGTCTGCCTACTTTCTGCTTTGTGCTTTCACCTACACCTCTGACTTTACGGGGGGCTGTCCCCCACTACCTCTCTGAAAAAAGTTAGCTTACAGCTCCAGTTAATAATTCCTGGGTGTGACAGTGTTTAACCTACAAACTCCTTTGGAAATCCTCTAGCCTGCCTGA…	G	intergenic	gene-CRNN(dist=91053),gene-LOC112445945(dist=125561)
3	19108611	19108611	C	CTCACCTAGAGCCAGACATCCAGGAATGTGAAGTCAAGTGACCTTAGGAAGTATCACTACAAACAAAGCTTAGTGGAGGTGATGGAATTCCAGTTGAGCTATTTCAAATCCTAAAAGATGATGCTATGAAAGTGCTGCACTCAATATGCCAGCAAATTTGGAAAACTCAGCAGTGGCCACAGGACTGGAAAAGGTCAGTTTTTCATTCCAATCCCAAAGAAAGGCAATGCCAAAGAATGCTTCAATTACTGCACAATTTCACTCATCTCACATGCTAGCAAAGTAATGCTCAAAATTCTCCAAGCCAGG	intronic	gene-SNX27
3	21011751	21011751	A	ACAGGGGTGTGCCGGGGACCAGCCCCGGCTGAACCAGGGTATTCGAAGGAGAGACGGCGTAGGCGAAGATCAGGAAACAACTGCTTAATTAAACGTTAATTAAGGATATAAAGAGTAATAGAATGAGGATAGCTCAGTGAGGAAATTCAGTGGAGAAAAGAGGCTGAGTAATTCAGCCAGAAGGTAAGAGAAAGAACGACATGGTGAGACCAAGTTTCGGTGAACAAGGCCCGCACTTTATTTTTCAAAGTAGTTTTTATACCTTAAGTTATGCACAGAGGATAATGGGGGAAGGGGTAGAGTCTTGCAGCAAACCAGGCTTTCTTCCTGCAAACTTATCATATGCAAAAGCTTAGGTGATTTGCATCATCTTCTGGCCCGGAGGCCTGTTAACATTTT…	upstream	gene-TRNAV-CAC-5
3	36350836	36352118	TAGCAGTGTGTTGGGGGCCAGAGTGAGGTACTCCGCCCGTGACAAAGGTCATGAGGAAGGAGGCTCGACATACGCAAAGGCAGGATCGAGCCTCAGGAGATCCTCGAGCATCTACCCCATAACCAGACCCTGCCTACTTTGTGCTCATCTACACCTCTGACTTTACGGGGGGCTGTCCCCCACCACCTCTTTCGGAGAAGGAGTTAATTTAGAGCTCCAGTTAATAAAAACTCCTGGGCGTGACAAGAGTGTTTTAACCTACAAACTCCTCTGAAGGTTCTCTGGCCTGCCTGACAGGCTTGTCTGGCCACATGTGATCACTCACAGCCTCCCAACCGTGAGAGGCACGAGATGCTTTAAATCTTCTAAAAACAGGTTCCTTAGAAAAGTTAGAAAACT…	T	intergenic	gene-TRNAC-ACA-12(dist=9966),gene-TRNAC-GCA-27(dist=791556)
3	40019767	40021059	AACTTATCTGCCGGGGACCAGCCCCGGCTGATCCAGGGTATTCGAAGGAGAGACGGCATAGGCGAGGATCAGGATACGATAGCTTCAATTAGGTATTAATTAAAGATATAAAGAGTAATAGAATAAGGATAGCTCAGTAGGAAAATTCAGTGGAGAAAAGAGGCTGAGTAGCTTGGTTTACGCGGGGGACCAATAAAACTTCAAGACAAGAAGCTTGCACCACTTACATAGGCCGCAGGCATCCTTCCGTTCTCCCGAAGGAGAGGAGACACTGAGGCCTCCCCGGTCGGATCTTAGAAGCCCAGGCATAATTAGTAAGCATGGTGGGTTCCGCGCTCCAGATGGAGACTCAACCAGAGTGAGAGAGAGAGCGACATGGGGAGACCAGTATTTCGAGAA…	A	intergenic	gene-RNPC3(dist=136279),gene-LOC533361(dist=213251)
3	40019775	40022630	TGCCGGGGACCAGCCCCGGCTGATCCAGGGTATTCGAAGGAGAGACGGCATAGGCGAGGATCAGGATACGATAGCTTCAATTAGGTATTAATTAAAGATATAAAGAGTAATAGAATAAGGATAGCTCAGTAGGAAAATTCAGTGGAGAAAAGAGGCTGAGTAGCTTGGTTTACGCGGGGGACCAATAAAACTTCAAGACAAGAAGCTTGCACCACTTACATAGGCCGCAGGCATCCTTCCGTTCTCCCGAAGGAGAGGAGACACTGAGGCCTCCCCGGTCGGATCTTAGAAGCCCAGGCATAATTAGTAAGCATGGTGGGTTCCGCGCTCCAGATGGAGACTCAACCAGAGTGAGAGAGAGAGCGACATGGGGAGACCAGTATTTCGAGAAACTGATCC…	T	intergenic	gene-RNPC3(dist=136287),gene-LOC533361(dist=211680)
3	41935280	41936559	GATCAAGTGCCGGGGTCCTGCCCCAGCTGATCCAGGGTATTCGAAGCGGGGACGGCGTCGGCGACCTATTTATTTAAATATTTTATCAAAGATATAAAGAGTAATAGGATGAGGATAGCTCAGTAGGAAAATTCAGTGGAGAAAAGAGGCTGAGTAGCTTGGTTTACGCGGGGGACCAATAAAACTTCAAGACAAAAAGCTTGCACCACTTACGTAGGCCGCAGGCGTCCTTCCGTTCTCCCGAAGGAGAGGAGACACTGAGGCCTCCCCGGTCGGATCTTAGAAGCCCAGGCATAATTAGTAAGCATGGTGGGTTCCGCGCTCCAGATGGAGACTCAGCCAGAGTGAGAGAGAGAGCGACATGGGGAGACCAGTATTTCGAGAAACTGATCCCAATTC…	G	intergenic	gene-OLFM3(dist=439988),gene-S1PR1(dist=96396)
3	46627659	46627659	A	AATTGACCTTTTCCAGTCCTGTGGCCACTGCTGAGTTTTCCAAATTTGCTGACATACTGAGTGAAGCACTTTCACAGCATCATCTTTCAGGATTTGGAATAGCTCAACTGGAATTCCATCACCTCCACTAGCTTTGTTTGTAGTGATGCTTTCTAAGGCCCACTTGACTTCACATTCCAGGATGTCTGGCTCTAGGTCAGTGAT	intergenic	gene-DPYD(dist=296878),gene-PTBP2(dist=26427)
3	49535304	49536608	CCTGGAGTGTTGGGGGCCAGAGTGAGGTACTCCGCCCATGGCAAAGGTCATGAGGAAGGAGGCTCGACATACGCAAAGGCGGGATCGAGCCTCAGGAGTCCCCCTGGAAATCCTCGAGCGTCTACCCCCATAACCAGAGCCTGCCTACTTTACTACTTTGTGCTCTTACCTACACCTCTGACTTTACGGGGGGCTGTCCCCCACCACCTCTTTCGGAGAAGGAGTTAACCTAGAGCTCCAGTCAATAAAAACTCTTGGGTGTGACAAGAGTGTTTTAACCTACAAACTCCTCTGAAGGTTCTCTAGCCTGCCTGACAGGCTCGTCCGGCCACATGTGATTGCTCACAGCCTCCCAACCGTGAGAGGCACGAGATGCTTTAAACCTTCTAAAAACAGGTT…	C	intergenic	gene-ABCA4(dist=4532),gene-GCLM(dist=45231)
3	53896019	53897318	TAGAGCTCTGCCGGGAGCTGGTGAGGCATTCCACTCGTGACAAAGGTCATGAGGAAGGAGGCTCGGCATACGCAAAGGCGGGATCGAGCCTCAGGAGTCCGCCCGGATATTCTCGAGCATCTACCCCCCAAAAAACCAGAGTCTGCCTACTTTATTGCTTTGTGCTCTCACCTCTGACTTTACTGGGGGCTGTCCCCTACCACCATCTCGCTCTCTCTGTCAAAGAGTTAACTTACAGCTCCAATTAATAAAGTTCCTGGGCAATTAGGAGTGTTTAAATCCAAACCCCTCAGATGGCTCTCTAACTCGCCTGACAAGTTTACCCGGACTCCTACAGCTATGCATACGATTGTTTACAGTCTCCCAGCCTCAAGAGGCACGGGAAGCTTAAGATATTCA…	T	intergenic	gene-LOC513659(dist=4620),gene-LOC786372(dist=10680)
3	57658774	57658779	ACTCAG	AACTCAGAGTGCCTGCCGGGGTCCAGCCCCGGCTGATCCAGGGTATTCAAAGGAGAGATGGCTTAGGTGACCTATTCAAATGTTAATTAGAGATATAAAGAGTAATAGAATGAGGATAGCTCAGTAGGAAAATTCAGTGGAGAAAAGAAGCTGAGTAGCTTGGTTTACGCGGAAAATCAATATAACCCGTGACACCAGGTTAGCTCTGACCACGGAGGCCGCAGGCGCCCTCTCGAATAGCGGAAGGTGCCCCACCTTAGACACCTTCTCGAGTGGGTCTTAGAAGCCCAGGCAAATAAATGGTAGCAGAGGATATCCGCGCTCCAGATGGAGACTCAGCTGGAATTTGAAGGGTAGAATGACATGGGGAGACCAAGCGTTGGTGAGCAAGGCCCGTAG…	intergenic	gene-CLCA2(dist=10126),gene-ODF2L(dist=15431)
3	70960345	70960526	TGTGGCCACTGCTGAGTTTTCCAAGTTTGCTGGCATATTAAGTGCAGCACTTTCACAGCATCATCTTTCAGGATTTGAAATAGCTCCACTGGAATGCCATTACCTCCACGAGCTTGGTTTTGAGCATTCTTTGGTATTGCCTTTCTTTGGGATTGGAATGAAAACTGACCTTTTCCAGTCCG	T	intergenic	gene-LRRIQ3(dist=142211),gene-TRNAC-ACA-15(dist=658504)
3	71146520	71146520	A	AAAGCCTGCCGGGGACCAGCCCCGGCTGATCCAGGGTATTCGAAGGAGAGACGGCATAGGCGAGGATCAGGATACGATAGCTTCAATTAGGTATTAATTAAAGATATAAAGAGTAATAGAATAAGGATAGCTCAGTAGGAAAATTCAGTGGAGAAAAGAGGCTGAGTAGCTTGGTTTACGCGGGAGACCAATAAAACTTCAAGACAAGAAGTTTGCACCACTTACGTAGGCCGCAGGCGTCCTTCCGTTCTCCCGAAGGAGAGGAGACACTGAGGCCTCCCCGGTCGGATCTTAGAAGCCCAGGCATAATTAGTAAGCATGGTGGGTTCCGCGCTCCAGATGGAGACTCAACCAGAGTGAGAGAGAGCGACATGGGGAGACCAGTATTTCGAGAAACTG…	intergenic	gene-LRRIQ3(dist=328386),gene-TRNAC-ACA-15(dist=472510)
3	71506372	71506372	T	TAGCAATTTCTCGAAATACTGGTCTCCCCATGTCGCTCTCTCTCTCACTCTGGCTGAGTCTCCATCTGGAGCGCGGAACCCGCCATCCTTACTAATTATGCCTGGGCTTCTAAGATCCAACTGGGGAGGCCTCAGTGTCTCCTCTCCTTCGGGAGAACGGAAGGACGCCTGCAGCCTACGTAAGTGGTGCAAACTTCTTGTCTTGAAGTTTTATTGGTCTCCCGCGTAAACCAAGCTACTCAGCCTCTTTTCTCCACTGAATTTCCTCACTGAGCTATCCTTATTTCAGCCTCTTTTCTTCACTGAATTTTACTGAGCTATCCTCATTCTATTACTCTTTATATCCTTAATTAACATTTAATTAAGCAATTGTTTCCTGATCTTCGCCTACGCCGTCTC…	intergenic	gene-LRRIQ3(dist=688238),gene-TRNAC-ACA-15(dist=112658)
3	71605457	71605457	T	TATAGATTGTTGGGGGCCAGAGTGAGGTACTCCGCCCATGGCAAAGGTCATGAGGAAGGAGGCTCGACATACGCAAAGGCGGGATCGAGCCTCAGGAGTCCCCCTGGAAATCCTCGAGCGTCTACCCCATAACCAGAGCCTGCCTACTTTACTACTTTGTGCTCTTACCTACACCTCTGACTTTACGGGGGGCTGTCCCCCACCACCTCTTTCGGAGAAGGAGTTAACCTAGAGCTCCAGTCAATAAAAACTCTTGGGTGTGGCAAGAGTGTTTTAACCTACAAACTCCTCTGAAGGTTCTCTGGCCTGCCTGACAGGCTCGTCTGGCCACATGTGATTGCTCACAGCCTCCCAACCATGAGAGGCACGAGATGCTTTAAACCTTCTAAAAACAGGTTC…	intergenic	gene-LRRIQ3(dist=787323),gene-TRNAC-ACA-15(dist=13573)
3	76619778	76619778	T	TGTATACTGCCGGGGACCAGCCCCGGCTGATCCAGGGTACTCGAAGGAGAGACGGCGTCGGCGAGGATCAGGATACGATAGCTTCAATTAGATATTAATTAGAGATATAAAGAGTAATAGAATAAGGATAGCTCAGTAGGAAAATTCAGTGGAGAAAAGAGGCTGAGTAGCTTGGTTTACGCGGGGGGCCAGAGTGAGGTACTCCGCCCATGGCA	intergenic	gene-LRRC7(dist=974553),gene-DEPDC1(dist=148376)
3	79970468	79971762	TAGGATCTGCCGGGAGCCGGTGAGGCATTCCACTCGTGACAAAGGTCATGAGGAAGGAGGCTCGGCATACGCAAAGGCGGGATCGAGCCTCAGGAGTCCGCCCGGATATTCTCGAGCATTTTCCCCCAAAAAAACCAGAGTCTGCCTACTTTATTGCTTTGTGCTCTCACCTCTGACTTTACTGGGGGCTGTTCCCTACCACCATCTCGCTCTCTCTGTCAAAGAGTTAACTTACAGCTCCAATTAATAAAGTTCCTGGGCAATTAGGAGTGTTTAAATCCAAACCCCTCAGATGGCTCTCTAACTCGGCTGACAAGTTTACCCGGACTCCTGCAGCTATGCATACTATTGTTTACAGTCACCCAGCCTCCAGAGGCACGGGAAGCTTAAGATATTCAA…	T	intronic	gene-DNAJC6
3	79970919	79971005	GATTTCATTGATGAGCCAATGCTTGTTGCCAAGTTTTCACATCCCCTGAATTGTATCCTTGAATGTGTATTAATTAATATAGTTGGT	G	intronic	gene-DNAJC6
3	79971047	79971103	AGACCCTTAAGGTAATAAATTCTTTCCTTTGTTGTAAACCCATTACACATCCGCCCT	A	intronic	gene-DNAJC6
3	79971322	79971382	CCCCTATTATCCTCTATGTGTAACTTAGGGTATAAAAGCCCCTGTTAAAAATAAAGCTAGG	CAA	intronic	gene-DNAJC6
3	81265153	81265153	T	TAACATTTGTTGGGGGCCAGAGTGAGGTACTCCGCCCGTGACAAAGGTCATGAGGAAGGAGGCTCGACATACGCAAAGGCGGGATCGAGCCTCAGGAGTCCCCCTGGAACTCCTCGAGCATCTACCCCCATAACCAGAGACTGCCTACTTTACTACTTTGTGCTCACCTACACCTCTGACTTTACGGGGGGCTGTCCCCCACCACCTCTTTTGGAGAAGGAGTTAACTTAGAGCTCCAGTTTATAATAATTCCTGGGCGTGATAAGAGTGTTTTAACCTACAAACTCCTCTGAAGGTTCTCTAGCCTGCCTGACAGGCTTGTCCGGCCACATGTGATTGCTCACAGCCTCCCAACCGTGAGAGGCACAAGATGCTTTAAACCCTCTAAAAACGGGTTCT…	intronic	gene-UBE2U
3	91296551	91296551	C	CCATCCCTGCCGGGGACCTGCCCCGGCTGATCCAGGGTATTCGAAGCGGGGACGGCGTCGGCGACCTATTTATTTAAATATTTTATCAAAGATATAAAGAGTAATAGGATGAGGATAGCTCAGTAGGAAAATTCAGTGGAGAAAAGAGGCTGAGTAGCTTGGTTTACGCGGGAGACCAATAAAACTTCAAGACAAGAAGTTTGCACCACTTACGTAGGCCGCAGGCGTCCTTCCGTTCTCCCGAAGGAGAGGAGACACTGAGGCCTCCCCGGTCGGATCTTAGAAGCCCAGGCATAATTAGTAAGCATGGTGGGTTCCGCGCTCCAGATGGAGACTCAACCAGAGTGAGAGAGAGAGCGACATGGGGAGACCAGTATTTCGAGAAACTGATCCCACTTC…	intergenic	gene-USP24(dist=9338),gene-BSND(dist=16292)
3	93234034	93235148	GGAGCCGGCATATTGCATATTGAGTGCATATTGCATATTGAGTGCAGCACTTTTCAGGATCTGGAATAGCTCAACTGGAATTCTATCACTGCCGGTAGCCAGCGTGAGGAACTCCGCCCATGACAAAGGTCATGAGGAAGGAGGCTCGGCATACGCAAAGGCGGGATCAAGCCTCAGGAGTCTCCCTGGAAATTCTCGAGCAATCTACCCCCAAAACCAGAGTCTGCCTACTTTCTGCTTTGTGCTGTCACCTACACCTCTGACTTTACGGGGGGCTGTCCCCCACTACCTCTCTCTGAAAAAAGAGTTAGCTTACAGCTCCAGTTAATAATTCTTGGGTGTGACAGTGTTTCAACCTACAAACTCCTTTGGAAGTCCTCTAGCCTGCCTGAATAGGTT…	G	intronic	gene-SCP2
3	93234620	93234703	CAGTGTATTGATTAATATAGTTGGTGTAAGTAGTAGCTTTAATGTTTGTAACCTGGGACCCTTGAGTTAATTCTTTTTCTTGTT	CCC	intronic	gene-SCP2
3	96352232	96353531	CCTGGCCTGCGGGGAGCCGGTGAGGCATTCTGCTCATGACAAAGGTCATGAGGAAGGAGGCTCGGCATACGCAAAGGCGGGATCGAGCCTCAGGAGTCCCCCCGGATATTCTCGAGCATTTTCCCCCAAAAAACCAGAGTCTGCCTACTTTATTGCTTTGTGCTCTCACCTCTGACTTTACTGGGGGCTGTCCCCTACCACCATCTCTCTCTCTCTCTCTGTCAAAGAGTTAACTTACAGCTCCAAGTAATAAAGTTCCTGGGCAATTAGGAGTGTTTAAATCCAAACCCCTCAGATGGCTCTCTAACTCGCCTGACAAGTTTACCCGGACTCCTGCAGCTATGCATACGATTGTTTACAGTCTCCTAGCCTCCAGAGGCACGGGAAGCTTAAGATATT…	C	intronic	gene-AGBL4
3	96794841	96796130	TGAGCTCTGTTGGGGGCCAGAGTGAGGTACTCCGCCCATGACAAAGGTCATGAGGAAGGAGGCTCGACATACGCAAAGGCGGGATCGAACCTCAGGAGTCCCCCTGGAACTCCTCGAGCGTCTACCCCCATAACCAGAGCCTGCCTACTTTACTACTTTGTGCTCTTACCTACACCTCTGACTTTACGGGGGGCTGTCCCCCACCACCTCTTTCGGAGAAGGAGTTAACCTAGAGCTCCAGTCAATAAAAACTCTTGGGTGTGACAAGAGTGTTTTAACCTACAAACTCCTCTGAAGGTTCTCTAGCCTGCCTGACAGGCTCGTCGGGCCACATGTGATTGCTCACAGCCTCCCAACCAATCTTGAGAGGCACAAGATGCTTTAAACCCTCTAAAAACA…	T	intronic	gene-AGBL4
3	97910514	97911802	TCTTGTCTGCCGGGGTCCTGCCCCGGCTGATCCAGGGTATTCGAAGCGGGGACGGCGTCGGCGACCTATTTATTTAAATATTTTATCAAAGATATAAAGAGTAATAGGATGAGGATAGCTCAGTAGAAAATTCAGTGGAGAAAAGAGGCTGAGTAGCTTGGTTTACGTGGGAGACCGATAAAACTTCAAGACAAGAAGTTTGCACCACTTACGTAGGCCGCAGGCGTCCTTCCATTCTCCCGAAGGAGAGGAGACACTGAGGCCTCCCCGGTCGGATCTTAGAAGCCCAGCATAATTAGTAAGCATGGTGGGTTCCACGCTTCAGATGGAGACTCACCAGAGTGAGAGAGAGAGCGACATGGGAGACCAGTATTTTGAGAAAACTGATCCCAATTCTTT…	T	intronic	gene-SPATA6
3	101000000	101105296	CCAGTTCACTGCCGGGGACCAGCCCCGGCTGATCCAGGGTATTCGAAGCGGGGACGGCGTCGGCGAGGATCAGGAAACAACTGCTTAATTAAACGTTAATTAAGGATATAAAGAGTAATAGAATGAGGATAGCTCAGTGAAGAAATTCAGTGGAGAAAAGAGGCTGAAATAAGGATAGCTCAGTGAGGAAATTCAGTGGAGAAAAGAGGCTGAATAATTCAGCCAGAAGGTAAGAGAAAGAACGACATGGTGAGACCAAGTTTCGGTGAACAAGGCCCACACTTTATTTTCCAAAGTAGTTTTTATACCTTAAGTTATGCATAGAGGATAATGGGGGAAGGGGTAGAGTCATGCAGTAAGCCAGGCTTTCTTCCTGCAAACTTATCATATGCAAAAGTT…	C	intronic	gene-EIF2B3
3	103000000	103095346	T	TCATTTCTGCCGGGGACCAGCCCCGGTGGATCCAGGGAATTCGAAGCGGGGACGGCATTGGCGAGGATCAGGAAACAATTGCTTAATTAAATGTTAATTAAGGATATAAAGAGTAATAGAATGAGGATAGCTCAGTAAAATTCAGTGAAGAAAAGAGGCTGAAATAAGGATAGCTCAGTGAGGAAATTCAGTAGAGAAAAGAGGCTGAATAATTCAGCCAGAAGGTAAGAGAAAGAACGACATGGTGAGACCAAGTTTCGGTGAACAAGGCCCGCACTTTATTTTCCAAAGTAGTTTTTATACCTTAAGTTATGCATAGAGGATAATGGGGGAAGGGGTAGAGTCAAGCAGTAAGCCAGGCTTTCTTCCTGCAAACTTATCATATGCAAAAGTTTAGGT…	intronic	gene-LOC531090
3	103000000	103187023	ACTGAAACTTGGTCTCCCCATGTCGCGCTCTCTCCCAAATTCTGGCTGAGTCTCCATCTGGAGCTCGGAACCCACCATGCTTGCTAATTATGCCTGGGCTTCTAAGATCTGACCAGGGAGGCCTCAGTGTCTCCTCTCCTTCGGGAGAACGGAAAGACGCCTGCGGCCTACGTAAGTGGTGCAAACTCCTTGTCTTGAAGTTTTATTGGTCTCCAGCGTAAACCAAGCTATTCAGCCTCTTTTCTCCACTGAATTTTCCTACTGAGCTATCCTCATCCTATTACTCTTTATATCTTTGATAAATATTTAAATAAATAGGTCGCCTATGCCATCTCTCCTTCGAATACCCTGGATCAGCTGGGGCTGGACCCCGGCAGGCTCGTCGTGGGGATCTTCCCA…	AT	intergenic	gene-LOC782545(dist=55141),gene-LOC614376(dist=112242)
3	104000000	103763509	T	TCTTGGGTGCCGGGGACCAGCCCCGGCTGATCCAGGGTATTCGAAGGAGAGACGGCATAGGCGAGGATCAGGAAACAACTGCTTAATTAAACGTTAACTAAGGATATAAAGAGTAATAGAATGAGGATAGCTCAGTGAGGAAATTTAGTGGAGAAAAGAGGCTGAATAATTCAGCCAGAAGGTAAGAGAAAGAACGACATGGTGAGACCAAGTTTCGGTGAACAAGGCCCGCACTTTATTTTCCAAAGTAGTTTTTATACCTTAAGTTATGCATAGAGGATAATGGGGGAAGGGGTAGAGTCTTGCAGCAAGCCAGGCTTTCTTCCTGCAAACTTATCATATGCAAAAGCTTATGATTTGCATCATCTTCTGGCCCGGAGGCCTGTTAACATTTTAAGA…	intergenic	gene-ZMYND12(dist=7871),gene-RIMKLA(dist=8929)
3	109000000	108772445	TTG	TGAAGACCTGCCGGGGACCAGCCCCGGCTGATCCAGGGTATTCGAAGGAGAGACGGCATAGGCGAGGATCAGGATACAATAGCTTCAATTAGATATTAATTAAAGATATAAAGAGTAATAGGATGAGGATAGCTCAGTAGGAAAATTCAGTGGAGAAAAGAGGCTGAGTAGCTTGGTTTACGCGGGAGACCAATAAAACTTCAAGACAAGAAGTTTGCACCACTTACGTAGGCCGCAGGCGTCCTTCCGTTCTCCCGAAGGAGAGGAGACACTGAGGCCTCCCAGGTCGGATCTTAGAAGCCCAGGCATAATTAGTAAGCATGGTGGGTTCCGCGCTCCAGATGGAGACTCAACCAGAGTGAGAGAGAGAGCGACATGGGGAGACCAGTATTTCGAGAA…	intergenic	gene-LOC104971855(dist=359783),gene-GRIK3(dist=60252)
3	109000000	109196118	AAGAACGACATGGGGACACCAAATTCCGGTGAACAAAAGGAGATACTTTATTTTCCAAAGCAGT	A	intergenic	gene-GRIK3(dist=119758),gene-MRPS15(dist=235113)
3	111000000	111393434	T	TTGGAGGTGCAGCTGCCGAGGACCAGCCCCGGCTGATCCAGGGTATTCGAAGGGGAGACGGCGTCGGCGACTATTTATATGCTAATTAGAGATATAGAGAACAATAGAATGAGGATAGCTCAGTAGGAAAATTCAGTGGAGAAAAGAAGCTGAGTAGCTTGGTTTACGCGGGAGACCAATAAAACTTCAAGACAAGAAGTTTGCACCACTTACGTAGGCCGCAGGCGCCCTCTCGAA	intergenic	gene-TRNAC-GCA-32(dist=34784),gene-TRNAC-ACA-19(dist=100988)
3	111000000	111394484	GAAGGTGTCTCACCCTAGACTCCTTCTCGAGTGGGTCTTAGAAGCCCAGGCATGATTAGTAAGCGTGGTGGGTTCCGCGCTCCAGATGGAGACTCAGCTGGAAGTTAAAAGAAAGAATGACATGGGGAGACCAAGCGTTGGTGAGCAAGGCCCGTAGCTTTATTTTTAACAGGGGCTTTTATACCCTAAGTTACACATAGAGGATAATAGGGGATGCAAAGTCAGCAGTCTTTGATTCTTATCAAAAACCAAGGTTTCTTTCCTGCAAATGGTTTAGGTGATTCACATCATCTTCTGGCCAGAAGGCCTACTAACATTTTATGACTCTTGACAAGGACTTATCAACAAAGACTTACTTTCTCTAAGAGTAATTATTTCAAGGTTTGGCACCATCTTCCA…	G	intergenic	gene-TRNAC-GCA-32(dist=34790),gene-TRNAC-ACA-19(dist=99938)
3	111000000	111393560	GGCATGATTAGTAAGCGTGGTGGGTTCCGCGCTCCAGATGGAGACTCAGCTGGAAGTTAAAAGAAAGAATGAC	G	intergenic	gene-TRNAC-GCA-32(dist=34838),gene-TRNAC-ACA-19(dist=100862)
3	111000000	111393710	ATAGAGGATAATAGGGGATGCAAAGTCAGCAGTCTTTGATTCTTATCAAAAACCAAGGTTTCTTTCCTGCAAATG	A	intergenic	gene-TRNAC-GCA-32(dist=34986),gene-TRNAC-ACA-19(dist=100712)
3	111000000	111393901	TGCATTCCTATAGGGCGGATGTGTAATGGGTTTACAACAAAGAAAGAATTTAT	TA	intergenic	gene-TRNAC-GCA-32(dist=35199),gene-TRNAC-ACA-19(dist=100521)
3	114000000	114269312	C	CATCCCTTGCCGGGAGCCGGCATATTGCATATTGAGTGCATATTGCATATTGAGTGCAGCACTTTTCAGGATCTGGAATAGCTCAACTGGAAATTCTATCACTGCCGGTAGCCAGCGTGAGGAACTCCGCCCATGACAAAGGTCATGAGGAAGGAGGCTCGGCATACGCAAAGGCGGGATCGAGCTTCAGGAGTCCCCCTGGAAATTCTCGAGCATATACCCCCAAAACCAGAGTCTGCCTACTTTCTGCTTTGTGCTTTCACCTACACCTCTGACTTTACGGGGGGCTGTCCCCCACTACCTCTCTGAAAAAAGTTAGCTTACAGCTCCAGTTAATAATTCCTGGGTGTGACAGTGTTTAACCTACAAACTCCTTTGGAAATCCTCTAGCCTGCCTGA…	intergenic	gene-LOC112445915(dist=153238),gene-SH3BP4(dist=265809)
3	116000000	116477307	C	CAACGAGTGCCGGGGTCCTGCCCCGGCTGATCCAGGGTATTCGAAGCGGGGATGGCGTCGGTGACCTATTTATTTAAATGTTTTATCAAAGATATAAAGAGTAATAGGATGAGGATAGCTCAGTAGGAAAATTCAGTGGAGAAAAGAGGCTGAGTAGCTTGGTTTACGCGGAAGACCAATAAAACTTCAAGACAAGAAGCTTGCACCACTTACGTAGGCCGCAGGCGTCCTTCCGTTCTCCCGAAGGAGAGGAGACACTGAGGCCTCCCCGGTCGGATCTTAGAAGCCCAGGCATAATTAGTAAGCATGGTGGGTTCCGCGCTCCAGATGGAGACTCAGCCAGAGTGAGAGAGAGAGAGACATGGGGAGACCAGTATTTCGAGAAACTGATCCCAATTC…	intergenic	gene-ACKR3(dist=439824),gene-COPS8(dist=74972)
3	118000000	117637718	A	AAGGTATCTGTGGGGAGCGAGCTCCGCCCATGGCAAAGGTCATGAGGAAGGAGGCTTGACATACGCAAAGGCGGGATCAAGCCTCAGGAGTCTCCCTGAAAATTCTCGAGCAATCTACCCCCAAAACCAGAGTCTGCCTACTTTCTACTTTGTGCTTTCACCTACACCTCTGACTTTACGGGGGGCTGTCCCCCACTACCTCTCTCTGAAAAAAGAGTTAGCTTACAGCTCCAGTTAATAATTCTTGGGTGTGACAGTGTTTCAACCTACAAACTCCTTTGGAAGTCCTCTAGCCTGCCTGAATAGGTTTTTCCGGCCACATGTGATTGTTCAGAGCCTCCCAACTGTGAGAGGCAGGAGATGTTCTAAACTGTCCAAACACAGATTCTTTTGAGTAGT…	intergenic	gene-PER2(dist=37984),gene-TRAF3IP1(dist=1380)
3	119000000	118923323	TGCCACCTGCCGGGGACCAGCCCCAGCTGATCCAGGGAATTCGAAGCGGGGACGGCGTCGGCGAGGATCAGGAAACAATTGCTTAATTAAACGTTAATTAAGGATATAAAGAGTAATAGAATGAGGATAGCTCAGTAGGAAAATTCAGTGGAGAAAAGAGGCTGAAATAAGGATAGCTCAGTGAGGAAATTCAGTGTAGAAAAGAGGCTGAATAATTCAGCCAGAAGGTAAGAGAAAGAACGACATGGTGAGACCAAGTTCGGTGAACAAGGCCCGCACTTTATTTTCCAAAGTAGTTTTTATACCTTAAGTTATGCATAGAGGATAATGGGGGAAGGGGTAGAGTCATGCAGTAAGCCAGGCTTTCTTCCTGCAAACTTATCATATGCAAAAGCTTAG…	T	intronic	gene-NDUFA10
3	121000000	120638151	G	GAGGACCCTGCCGGGGACCAGCCCCGGCTGATCCAGGGTATTCGAAGGAGAGACGGCGTAGGCGAAGATCAGGAAACAATTGCTTAATTAAATGTTAATTAAGGATATAAATATAAAGAGTAATAGAATAAGGATAGCTCAGTAGGAAAATTCAGTGGAGAAAAGAGGCTGAGTAGCTTGGTTTACCCGGGAGACCAATAAAACTTCAAGACAAGAAGTTTGCACCACTTACGTAGGCCGCAGGTGTCCTTCCGTTCTCCCGAAGGAGAGGAGACACTGAGGCCTCCCCGGTCGGATCTTAGAAGCCCAGGCATAATTAGTAAGCATGGTGGGTTCCGCGCTCCAGATGGAGACTCAGCCAGAGTGAGAGAGAGAGCGACATGGGGAGACCAGTATTTC…	intergenic	gene-STK25(dist=15842),gene-BOK(dist=8255)
4	945981	945981	A	AAGGAAACTGCCGGGGACCAGCCCCGGCTGATCCAGGGTATTCGAAGGAGAGACGGCGTAGGCGAAGATCAGGAAACAATTGCTTAATTAAATGTTAATTAAGGATATAAAGAGTAATAGAATGAGGATAGCTCAGTAGGAAAATTCGGTGAAGAAAAGAGGCTGAAATAAGGATAGCTCAGTGAGGAAATTCAGTGGAGAAAAGAGGCTGAATAATTCAGCCAGAAGGTAAGAGAAAGAACGACATGGTGAGACCAAGTTTCGGTGAACAAGGCCCGCACTTTATTTTTCAAAGTAGTTTTTATACCTTAAGTTATGCACAGAGGATAATGGGGGAAGGGGTAGAGTCAGGCAGCAAGCCAGGCTTTCTTCCTGCAAACTTAGCATATGCAAAAGTTA…	intergenic	gene-TRNAC-ACA-20(dist=9721),NONE(dist=NONE)
4	1063259	1064380	GGGGCAGTGCCGGGGACCAGCCCCGGCTGATCCAGGGTATTCGAAGGAGAGACGGCGTAGGCGAAGATCAGGAAACAACTGCTTAATTAAACGTTAATTAAGGATATAAAGAGTAATAGAATGAGGATAGCTCAGTAAAATTCAGTGAAGAAAAGAGGCTGAAACAAGGATAGCTCAGTGAGGAAATTCAGTGGAGAAAAGAGGCTGAATAATTCAGCCAGAAGGTAAGAGAAAGAACGACATGGTGAGACCAAGTTTCGGTGAACAAGGCCCGCACTTTATTTTCCAAAGTAGTTTTTATACCTTAAGTTATGCATAGAGGATAATGGGGGAAGGGGTAGAGTCAGGCAGCAAACCAGGCTTTCTTCCTGCAAACTTATCATATGCAAAAGCTTAGGT…	G	intergenic	gene-TRNAC-ACA-20(dist=126999),NONE(dist=NONE)
4	1063277	1063347	AGCCCCGGCTGATCCAGGGTATTCGAAGGAGAGACGGCGTAGGCGAAGATCAGGAAACAACTGCTTAATTA	AATT	intergenic	gene-TRNAC-ACA-20(dist=127017),NONE(dist=NONE)
4	1063378	1063452	AATGAGGATAGCTCAGTAAAATTCAGTGAAGAAAAGAGGCTGAAACAAGGATAGCTCAGTGAGGAAATTCAGTGG	A	intergenic	gene-TRNAC-ACA-20(dist=127118),NONE(dist=NONE)
4	1063498	1063549	ACATGGTGAGACCAAGTTTCGGTGAACAAGGCCCGCACTTTATTTTCCAAAG	A	intergenic	gene-TRNAC-ACA-20(dist=127238),NONE(dist=NONE)
4	1063598	1063676	AGAGTCAGGCAGCAAACCAGGCTTTCTTCCTGCAAACTTATCATATGCAAAAGCTTAGGTGATTTGCATCATCTTCTGG	AC	intergenic	gene-TRNAC-ACA-20(dist=127338),NONE(dist=NONE)
4	1600269	1601563	TGTCCCTTGCGGGGAGCCGGTGAGGCATTCCACTCGTGACAAAGGTCATGAGGAAGGAGGCTCGGCATACGCAAAGGCGGGATCGAGCCTCAGGAGTCCCCCCGGATATTCTCGAGCATTTTCCCCCAAAAAAACCAGAGTCTGCCTACTTTATTGCTTTGTGCTCTCACCTCTGACTTTACTGGGGGCTGTCCCCTACCACCATCTCGCTCTCTCTCTGTCAAAGAGTTAACTTACAGCTCCAATTAATAAAGTTCCTGGGCAATTAGGAGTGTTTAAATCCAAACCCCTCTGATGGCTCTCTAACTAGCCTGACAAGTTTACCCGGACTCCTGCAGCTATGCATACGATTGTTTACAGTCTCCCAGCCTCGAGAGGCATGGGAAGCTTAAGATATTC…	T	intergenic	gene-TRNAC-ACA-20(dist=664009),NONE(dist=NONE)
4	1600723	1600796	ATTTCATTGATGAGTCAATGCTTGTTGCCAAGTTTTCACATCCCCTGAATTGTATCCTTGAATATGTATCAATT	A	intergenic	gene-TRNAC-ACA-20(dist=664463),NONE(dist=NONE)
4	5406927	5408217	TATATAGCTGTTGGGGGCCAGAGTGAGGTACTCCGCCCATGACAAAGGTCATGAGGAAGGAGGCTCAACATACGCAAAGGCGGGATTGAGCCCCAGGAGTCCCCCTGGAAATCCTCAAGCATCTACCCCCATAACCAGAGCCTGCCTACTTTACTAGTTTGTGCTCTCACCTACATCTCTGACTTTACGGGGGGCTGTCCCCCACCACCTCTTTCGGAGAAGGAGTTAACTTAAAGCTCCAGTTAATAATAATTCCTGGGTGTGATAAGAGTGTTTTAACCTACAAACTCCTCTGAAGGTTCTCTAGCCTGCCTGACAGGCTTGTCCGGCCACATGTGATTGCTCACAGCCTCCCAACCGTGAGAGGCATGAGATGCTTTAAACCTTCTAAAAACAGGT…	T	intronic	gene-DDC
4	5407049	5407099	CTACCCCCATAACCAGAGCCTGCCTACTTTACTAGTTTGTGCTCTCACCTA	CC	intronic	gene-DDC
4	5407380	5407450	TGTATTGGTGAAGGGTTTTTCATTTGTTGAGCCAATGTTTGTTGCTAAGTTTCCACATCCCCTGCCCTTAC	TA	intronic	gene-DDC
4	12851749	12851749	C	CCTTGTGTGCCGAGGACCAGCCCCGGCTGATCCAGGGTATTCGAAGGGGAGACGGCGTCGGCGACTATTTATATGCTAATTAGAGATATAGAGAACAATAGAATGAGGATAGCTCAGTAGGAGAATTCAGTGGAGAAAAGAAGCTGAGTAGCTTGGTTTACGCGGGAGACCAATAAAACTTCAAGACAAGAAGTTTGCACCACTTCCGTAGGCCGCAGGCGCCCTCTCGAATAGCGGAAGGTGTCTCACCCTAGACACCTTCTCGAGTGGGTCTTAGAAGCCCAGGCATGATTAGTAAGCGTGGTGGGTTCCGCGCTCCAGATGGAGACTCAGCTGGAAGTTAAAAGAAAGAATGACATGGGGAGACCAAGCGTTGGTGAGCAAGGCCCGTAGCTTTAT…	intergenic	gene-ASB4(dist=24023),gene-LOC613363(dist=1149)
4	20293607	20293607	T	TAAATGGTGCCGGGGTCCAGCCCCGGTGGATCCAGGGAATTCGAAGCGGGGACGGCGTCGGTGAGGATCAGGAAACAACTGCTTAATTAAACTTTAATTAAGGATATAAAGAGTAATAGAATAAGGATAGCCCAGTGAGGAAATTCAGTGGAGAAAAGAGGCTGAATAATTCAGCCAGAAGGTAAGAGAAAGAACGACATGGGGAGACCAAGTTTCGGTGAACAAGGCCCGCACTTTATTTTTCAAAGTAGTTTTTATACCTTAAGTTATGCATAGAGGACAATGGGGGAAGGGGTAGAGTCATGCAGCAAGCCAGGCTTTCTTCCTGCAAACTTATCATATGCAAAAGCTTAGGTGATTTGCATCATCTTCTGGCCCGGAGGCCTGTTAACGTTTTAA…	intergenic	gene-THSD7A(dist=303219),gene-TMEM106B(dist=72525)
4	20293607	20293607	T	TAAATGGTGCCGGGGTCCAGCCCCGGTGGATCCAGGGAATTCGAAGCGGGGATGGCGTCGGCGAGGATCAGGAAACAACTGCTTAATTAAACTTTAATTAAGGATATAAAGAGTAATAGAATAAGGATAGCTCAGTGAGGAAATTCAGTGGAGAAAAGAGGCTGAATAATTCAGCCAGAAGGTAAGAGAAAGAACGACATGGGGAGACCAAGTTTCGGTGAACAAGGCCCGCACTTTATTTTCCAAAGTAGTTTTTGTACCTTAAGTTATGCATAGAGGATAATGGGGGAAGGGGTAGAGTCATGCAGCAAGCCAGGCTTTCTTCCTGCAAACTTATCATATGCAAAAGCTTAGGTGATTTGCATCATCTTCTGGCCCAGAGGCCTGTTAACATTTTAA…	intergenic	gene-THSD7A(dist=303219),gene-TMEM106B(dist=72525)
4	20432208	20432208	T	TAAGATCTGTTGGGGGCCAGAGTGAGGTACTCCGCCCATGGCAAAGGTCATGAGGAAGGAGGCTCGACATACGCAAAGGCGGGATCGAGCCTCAGGAGTCCCCCTGGAAATCCTCGAGCATCTACCCCCATAACCAGAGCCTGCCTACTTTACTACTTTGTGCTCTTACCTACACCTCTGACTTTACGGGGGGCTGTCCCCCACCACCTCTTTCGGAGAAGGAGTTAACCGAGAGCTCCAGTCAATAAAAACTCTTGGGTGTGACAAGAGTGTTTTAACCTACAAACTCCTCTGAAGGTTCTCTAGCCTGCCTGACAGGCTCGTCGGGCCACATGTGATTGCTCACAGCCTCCCAACCGTGAGAGGCACGAGATGCTTTAAACCCTCTAAAAACAGGTT…	intergenic	gene-TMEM106B(dist=38467),gene-VWDE(dist=9621)
4	20736602	20737080	CCATACAGTGCGGGGAGCTGCCCGTGAGAACGGGGTCCTTTGTCTGAAGGACACAGCTCTGGGAGCTGCCTCAGTCCTTGAGGGTTTGCTTGCAAACATAGCTCTCTGTCCCGCCACCCCAGAGATTAGGTGCTTATTTACTGCAGGCACCTGGAGTTCTGTGCAAACTTCTCACGCACAGAGATATGTTATCTGGCGTAAGAAATAATAACAGGGAGCCATTCCCATGCTCTCAAGATTTCTTGTGACTGTTTGTAAGATGTATAGGCTAACCAAGAAAAAATGTCAACTGTTTTGTCTCTCTCACGCTTTTCTGTATAAATATGAGATGTTGAATAAAGTTGGTGTCAGACTGCGTCCCTTCGTGGTGATGTGTCTGAACCTCTCGACCCCATCTTT…	C	intergenic	gene-SCIN(dist=33975),gene-ARL4A(dist=26781)
4	22614148	22615247	TATTGCGGGGAGCGAGCTCCGCCTCTGGCAAAGGTCATGAGGAAGGAGGCTTGGCATACGCAAAGGCGGGATCAAGCCTCAGGAGTCTCCCTGGAAATTCTCGAGCAATCTACCCCCAAAACCAGAGTCTGCCTACTTTCTGCTTTGTGCTTTCACCTACACCTCTGACTTTACGGGGGGCTGTCCCCCACTACCTCTCTGAAAAAAGTTAGCTTACAGCTCCAGTTAATAATTCCTGGGTGTGACAGTGTTTAACCTACAAACTCCTTTGGAAATCCTCTAGCCTGCCTGAATAGGTTTTTCCGGCCTCATGTGATTGTTCAGAGCCTCCCAACTGTGAGAGGCAGGAGATGTTCTAAACTGTCTAAACACAGATTCTTTTGAGTAGTTAAAAGATTG…	T	intronic	gene-DGKB
4	28592361	28593649	GGGTCATTGTTGGGGGCCAGAGTGAGGTACTCCGCCCGTGACAAAGGTCATGAGGAAGGAGGCTCGACATACGCAAAGGCGGGATCGAGCCTCAGGAGTCCCCCTGGAACTCCTCGAGCATCTACCCCCATTACCAGAGCCTGCCTACTTTACTACTTTGTGCTCACCTACACCTCTGACTTTACGGGGGGCTGTCCCCCACCACCTCTTTTGGAGAAGGAGTTAACTTAGAGCTCCAGTTTATAATAATTCCTGGGCATGATAAGAGTGTTTTAACCTACAAACTCCTCTGAAGGTTCTCTGGCCTGCCTGACAGGCTTGTCCGGCCACATGTGATCACTCACAGCCTCCCAACCGTGAGAGGCACAAGATGCTTTAAACCTTCTAAAAACAGGTTCC…	G	intergenic	gene-TMEM196(dist=37622),gene-MACC1(dist=194786)
4	31178701	31179943	GAGACCCTGTTGGGGGCCAGAGTGAGGTACTCCGCCCGTGACAAAGGTCATGAGGAAGGAGGCTCGACATACGCAAAGGCGGGATCGAGCCTCAGGAGTCCCCCTGGAACTCCTCGAGCATCTGCCCCCATAACCAGAGCCTGCCTACTTTACTACTTTGTGCTCTTACCTACACCTCTGACTTTACGGGGGGCTGTCCCCCACCACCTCTTTCGGAGAAGGAGTTAACCTAGAGCTCCAGTCAATAAAAACTCTTGGGTGTGACAAGAGTGTTTTAACCTACAAACTCCTCTGAAGGTTCTCTAGCCTGCCTGACAGGCTTGTCCGGCCACATGTGATTGCTCACAGCCTCCCAACCGTGAGAGGCACAAGATGCTTTAAACCCTCTAAAAACAGGTT…	G	intergenic	gene-RAPGEF5(dist=35424),gene-IL6(dist=274833)
4	31178864	31178948	TCTTACCTACACCTCTGACTTTACGGGGGGCTGTCCCCCACCACCTCTTTCGGAGAAGGAGTTAACCTAGAGCTCCAGTCAATAA	TTGCC	intergenic	gene-RAPGEF5(dist=35587),gene-IL6(dist=275828)
4	31179025	31179120	CCGGCCACATGTGATTGCTCACAGCCTCCCAACCGTGAGAGGCACAAGATGCTTTAAACCCTCTAAAAACAGGTTCTTTAGAGAAGTTAGAAAACT	CTA	intergenic	gene-RAPGEF5(dist=35748),gene-IL6(dist=275656)
4	34407898	34413616	GTGTGGGGAGATGGACCCATTCTAGAGGGCCATTTTGCCATAAAACTCCCGTAGGTGCTGTTGGAGTAGCTAGGCAGAGGAATTGCCAATTTGTTTGTAAATTAACTCTTTTAACATAGCTATCAGATAAAGCTGCTTCCACTTTTTCTAAGGCCTCCTGAGCCTCAGCAGTTAATTGTCTCTTAGAAGTTGGATCAGGATCCCCACGTAAAATGTTAAAAAGAGGTTTTAATTCAGCAGTAGTTAATTTTAAATAAGGCCTGATCCAATTAATGTCGCCTAAAAGTTTTTGATAATCATTTAAAGTAACAAGGTGATCTTTTCTCAATTTTAATGGGGCATGAGTCACAGTTTTTGAATTGATAACCCGTCCTAAGTAAGTTATGGGCGGATTGACTT…	G	exonic	gene-LOC112446473
4	39382499	39383793	AAGAGGAATGCCGGGGACCAGCCCCGGCTGATCCAGGGTATTCGAAGGAGAGACGGCATAGGCGAGGATCAGGATACAATAGCTTCAATTAGATATTAATTAGAGATATAAAGAGTAATAGAATAAGGATAGCTCAGTAGGAAAATTCAGTGGAGAAAAGAGGCTGAGTAGCTTGGTTTACGCGGGGGACCAATAAAACTTCAAGACAAGAAGTTTGCACCACTTACGTAGGCCGCAGGCGTCCTTCCGTTCTCCCGAAGGAGAGGAGACACTGAGGCCTCCCCGGTCGGATCTTAGAAGCCCAGGCATAATTAGTAAGCATGGTGGGTTCCGCGCTCCAGATGGAGACTCAACCAGAGTGAGAGAGAGAGCGACATGGGGAGACCAGTATTTCGAGAA…	A	intergenic	gene-LOC107132393(dist=56299),gene-SEMA3C(dist=555793)
4	41342105	41343919	TTATACATGTTTCAATGCCATTCTCCCAAATCTTCCCACCCTCTCCCTCTCCCAGAGTCCATAAGACTGTTCTATACATCAGTGTCTCTTTTGCTGTCTCGTACACAGGGTTATTGTTACCATCTTTCTAAATTCCATATATATGCGTTAGTATACTGTATTGGTGTTTTTCCTTCTGGCTTACTTCACTCTGTATAATAGGCTCCAGTTTCATCCACTGCCGGGAGCTGGCATATTGCATATTGAGTGCATATTGCATATTGAGTGCAGCACTTTTCAGGATCTGGAATAGCTCAACTGGAATTCTATCACTGCCGGTAGCCAGCGTGAGGAACTCCGCCCATGACAAAGGTCATGAGGAAGGAGGCTTGGCACACGCAAAGGCGGGATCGAGCCTCA…	TAG	intergenic	gene-GNAI1(dist=280521),gene-MAGI2(dist=861447)
4	47186525	47186525	C	CTTCCAAATTTGCTGGCATATTGAGTGAAGCACTTCCACAGCATCATCTTTCAAGATTTGAAATAGCTCAACTGGAATTCCATCACCTCCACTAGCTTTATTCATAGTGATGCTTTCTAAGGCCCACTTGACTTCACATTCCGG	intergenic	gene-SYPL1(dist=6279),gene-NAMPT(dist=134702)
4	52644422	52645714	CCTTCACTGTTGGGGGCCAAAGTGAGGTACTCCGCCCATGACAAAGGTCATGAGGAAGGAGGCTCGACATACGCAAAGGCGGGATCGAGCCTCAGGAGTCCCCCTGGAACTCCTCGAGCATCTACCCCCATAACCAGAGCCTGCCTACTTTACTACTTTGTGCTCACCTACACCTCTGACTTTACGGGGGGCTGTCCCCCACCACCTCTTTTGGAGAAGGAGTTAACCTAGAGCTCCAGTTAATAATAATTCCTGGGCGTGATAAGAGTGTTTTAACCTACAAACTCCTCTGAAGGTTCTCTGGCCTGCCTGACAGGCTTGTCCGGCCACATGTGATCGCTCACAGCCTCCCAACCGTGAGAGGCACAAGATGCTTTAAACCTTCTAAAAACAGGTTCC…	C	intergenic	gene-TFEC(dist=143391),gene-MDFIC(dist=797081)
4	59746687	59747807	CCTTATTTGCGGGGAGCGAGCTCCGCCTCTGGCAAAGGTCATGAGGAAGGAGGCTTGGCATACGCAAAGGCGGGATCAAGCCTCAGGAGTCTCCCTGGAAATTCTCGAGCAATCTACCCCCAAAACCAGAGTCTGCCTACTTTCTGCTTTGTGCTTTCACCTACACCTCTGACTTTACGGGGGGCTGTCCCCCACTACCTCTCTGAAAAAAGTTAGCTTACAGCTCCAGTTAATAATTCCTGGGTGTGACAGTGTTTAACCTACAAACTCCTTTGGAAATCCTCTAGCCTGCCTGAATAGGTTTTTCCAGCCACATGTGATTGTTCAGAGCCTCCCAACTGTGAGAGGCAGGAGATGTTCTAAACTGTGTAAACACAGATTCTTTTGAATAGTTAAAAG…	C	intergenic	gene-GPR141(dist=26616),gene-ELMO1(dist=119879)
4	64283613	64283613	G	GGATCTGTGTTGGGGGCCAGAGTGAGGTACTCCGCCCGTGACAAAGGTCATGAGGAAGGAGGCTCGACATACGCAAAGGCGGGATCGAGCCTCAGGAGTCCCCCTGGAACTCCTCGAGCATCTACCCCCATAACCAGAGCCTGCCTACTTTACTACTTTGTGCTCACCTACACCTCTGACTTTACGGGGGGCTGTCCCCCACCACCTCTTTTGGAGAAGGAGTTAATTTAGAGCTCCAGTTTATAATAATTCCTGGGCGTGATAAGAGTGTTTTAACCTACAAACTCCTCTGAAGGTTCTCTAGCCTGCCTGACAGGCTCGTCCGGCCACATGTGATTGCTCACAGCCTCCCAACCGTGAGAGGCACAAGATGCTTTAAACCCTCTAAAAACGGGTTCT…	intronic	gene-PDE1C
4	64504984	64506279	TCACTCCACTGCCGAGGACCAGCCCCGGCTGATCCAGGGTATTCGAAGGGGAGACGGCGTCGGCGACTATTTATATGCTAATTAGAGATATAGAGAACAATAGAATGAGGATAGCTCAGTAGGAAATTTCAGTGGAGAAAAGAAGCTGAGTAGCTTGGTTTACGCGGGAGACCAGTAAAACTTCAAGACAAGAAGTTTGCACCACTTACGTAGGCCGCAGGCGCCCTCTCGAATAGCGGAAGGTGTCTCACCCTAGACACCTTCTCGAGTGGGTCTTAGAAGCCCAGGCATGATTAGTAAGCGTGGTGGGTTCCGCGCTCCAGATGGAGACTCAGCTGGAAGTTAAAAGAAAGAATGACATGGGGAGACCAAGCATTGGTGAGCAAGGCCCGTAGCTTT…	T	intronic	gene-PDE1C
4	71069696	71070903	TGCCGGGGACCAGCCCCGGCTGATCCAGGGTATTTGAAGGAGAGACGGCGTAGGCGAAGATCAGGAAACAATTGCTTAATTAAACGTTAATTAAGGATATAAAGAGTAATAGAATGAGGATAGCTCAGTGAGGAAATTCAGTGGAGAAAAGAGGCTGAATAATTCAGCCAGAAGGTAAGAGAAAGAACGACATGGTGAGACCAAGTTTCGGTGAACAAGGCCCGCACTTAATTTTTCAAAGTAGTTTTTATACCTTAAGTTATGCATAGAGGATAATGGGGGAAGGGGTAGAGTCATGCAGCAAGCCAGGCTTTCTTCCTGCAAACTTATCATATGCAAAAGCTTAGGTGATTTGCATCATCTTCTGGCCCGGAGGCCTGTTAACATTTTAAGACCCTT…	T	intergenic	gene-LOC100299757(dist=5550),gene-GSDME(dist=17477)
4	82517750	82519042	TGAAATCTGTTGGGGGCCAGAGTGAGGTACTCCGCCCATGGCAAAGGTCATGAGGAAGGAGGCTCGACATACGCAAAGGCGGGATCGAGCCTCAGGAGTCCCCCTGGAAATCCTCGAGCATCTACCCCCATAACCAGAGCCTGCCTACTTTACTACTTTGTGCTCACCTACACCTCTGACTTTACGGGGGGCTGTCCCCCACCACCTCTTTTGGAGAAGGAGTTAACTTAAGAGCTCCAGTTTATAATAATTCCTGGGCGTGATAAGAGTGTTTTAACCTACAAACTCCTCTGAAGGTTCTCTGGCCTGCCTGACAGGCTTGTCCGGCCACATGTGATCGCTCACAGCCTCCCAACCGTGAGAGGCACAAGATGCTTTAAACCTTCTAAAAACAGGTTC…	T	intergenic	gene-AMPH(dist=9088),gene-LOC100335205(dist=24772)
4	82714659	82714659	G	GGCCAAGTGCCGGAGCCAGCCGGCAAAGTCGATCAGGTCCCGAGAACGTGCACGGCGGGGCTAAGAAAGAAACTAAAGCAAGAGACTACAAAGATGGGGTCGAGAGGTTCAGACACGTCACCACGAAGGGACGCAGTCTGACACCAACTTTATTCAACATCTCATATTTATACAGAAAAGCGTGAGAGAGACAAAACAGTTGACATTTTTTCTTGGTTAGCCTATACATCTTACAAACAGTCACAAGAAATCTTGAGAGCATGGGAATGGCTCCCTGTTATTATTTCTTACACCAGATAACATTTCTCTGTGCGTGAGAAGTTTGCACAGAACTCCAGGTGCCTGCAGTAAATAAGCGCCTAATCTCTGGGGTGGCGGGACAGAGAGCTATGTTTGCAA…	intergenic	gene-TRGC3(dist=3798),gene-TRGC4(dist=5534)
4	82815696	82815696	C	CACTTAGTGCCAGAGCCAGGGATTCGAAGCCGACCACTAGTTTTATCCCACTTTTGTTGTTGATACAGTACTTCTTTGACTGTCTTTCCTTGTAATGCCGCGGCCAAAGTTATGCCTTGAACTATGAAGGGCCGATATCAGCACAAATCCGTATATAGTCAGATAAGCCTCCCTTTTTCCTGTAAGGTCTCAGGGCAGCTTGACAAGCCGAATTGGCATTCTCATAAGCAAGCTGTTTAGTCAACACCATCCCCGCCTGCTCATCCCCTATCATTTTACCAATTGTCTCAAGCAGGCGGGCAACAAAATCCTGATATGGCTCATCTGGCCCCTGGCGAATTTTAGATAAATCTTCAGTCTTTTTATCAGAATTTGGAAGCTTTTTCCATGCTTGTAGAG…	intergenic	gene-LSM8(dist=8674),gene-LOC112446347(dist=1868362)
4	88186324	88186324	G	GCAGAACTGCGGGGAGCTGCCCGTGAGAACGGGGTCCTTTGTCCGAAGGACACAGCTCTGGGAGCTGCCTCAGTCCTTGAGGGTTTGCTTGCAAACATAGCTCTCTGTCCCGCCACCCCAGAGATTAGGCGCTTATTTACTGCAGGCACCTGGAGTTCTGTGCAAACTTCTCATGCACAGAGAAATGTTATCTGGTGTAAGAAATAATAACAGGGAGCCATTCCCATGCTCTCAAGATTTCTTGTGACTGTTTGTAAGATGTATAGGCTAACCAAGAAAAAAAGGTCAACTGTTTTGTCTCTCTCACGCTTTTCTGTATAAATATGAGGTGTTGAATAAAGTTGGTGTCAGACTGCGTCCCTTCGTGGTGACGTGTCTGAACCTCTCGACCCCATCTTT…	intronic	gene-HYAL4
4	89343595	89344901	TGACTGATGCCGGGGTCCAGCCCCGGCTGATCCAGGGTATTCGAAGGAGAGACAGCGTAGGCGAAGATCAGGAAACAATTGCTTAATTAAATGTTAATTAAGGATATAAAGAGTAATAGAATGAGGATAGCTCAGTAGGAAAATTCAGTGGAGAAAAGAGGCTGAGTAGCTTGGTTTACGCGGGAGACCAATAAAACTTCAAGACAAGAAGTTTGCACCACTTACGTAGGCCACAGGCGTCCTTCCGTTCTCCCGAAGGAGAGGAGACAATGAGGCCTCCCCGGTCGGATCTTAGAAGCCCAGGCATAATTAGTAAGCATGGTGGGTTCCGCGCTCCAGATGGAGACTCAGCCAGAGTGAAAGAGAGAGAGACATGGGGAGACCAGTATTTCGAGAAAC…	T	intergenic	gene-POT1(dist=153020),gene-TRNAR-ACG-3(dist=823926)
4	89892113	89893407	TAGTATAGTGCCGGGGACCAGCCCCGGCTGATCCAGGGTATTCGAAGGAGAGACGGCGTCGGCAAGGGTCAGGATACGATAGCTTCAATTAGATATTAATTAAAGATATAAAGAGTAATAGGATGAGGATAGCTCAGTAGGAAAATTCAGTGGAGAAAAGAGGCTGAGTGGCTTGGTTTACGCGGGAGACCAATAAAACTTCAAGACAAGAAGTTTGCACCACTTACGTAGGCCGCAGGCGTCCTTCCGTTCTCCCGAAGGAGAGGAGACACTGAGGCCTCCCCGGTCGGATCTTAGAAGCCCAGGCATAATTAGTAAGCATGGTGGGTTCCGCGCTCCAGATGGAGACTCAGCCAGAGTGAGAGAGAGAGCGACATGGGGAGACCAGTATTTCGAGAA…	T	intergenic	gene-POT1(dist=701538),gene-TRNAR-ACG-3(dist=275420)
4	94217461	94217461	C	CATGCCCTGCCGGGGACCAGCCCCGGCTGATCCAGGGTATTCGAAGGAGAGACGGCGTCGGCGAGGGTCAGGATACGATAGCTTCAATTAGGTATTAATTAAAGATATAAAGAGTAATAGAATAAGGATAGCTCAGTAGGAAAATTCAGTGGAGAAAAGAGGCTGAGTAGCTTGGTTTACGCGGGAGACCAATAAAACTTCAAGACAAGAAGTTTGCACCACTTACGTAGGCCGCAGGCGTCCTTCCGTTCTCCCGAAGGAGAGGAGACACTGAGGCCTCCCCGGTCGGATCTTAGAAGCCCAGGCATAATTAGTAAGCATGGTGGGTTCCGCGCTCCAGATGGAGACTCAACCAGAGTGAGAGAGAGAGCGACATGGGGAGACCAGTATTTCGAGAAA…	intergenic	gene-CEP41(dist=25125),gene-MEST(dist=28056)
4	109000000	108906698	CCACACATGCGGGGAGCCGGTGAGGCATTCCACTCGTGACAAAGGTCATGAGGAAGGAGGCTCGGCATACGCAAAGGCGGGATCGAGCCTCAGGAGTCCCCCCGGATATTCTCGAGCATTTTCCCCCAAAAAACCAGAGTCTGCCTACTTTATTGCTTTGTGCTCTCACCTCTGACTTTACTGGGGGCTGTCCCCTACCACCGTCTCTCTCTCTCTGTGTCAAAGAGTTAACTTACAGCTCCAATTAATAAAGTTCCTGGGCAATTAGGAGTGTTTAAATCCAAACCCCTCTGATGGCTCTCTAACTCGCCTGACAAGTTTACCCGGACTCCTGCAGCTATGCATACGATTGTTTACAGTCTCCCAGGAGAGGCATGGGAAGCTTAAGATATTCAAATA…	C	intergenic	gene-TPK1(dist=798517),gene-LOC112446342(dist=295816)
4	110000000	109560554	C	CCCTGAGTGCCGGGGACCAGCCCCGGCTGATCCAGGGAATTCGAAGCGGGGACGGCGTCGGCGAAGATCAGGAAACAATTGCTTAATTAAACGTTAATTAAGGATATAAAGAGTAATAGAATGAGGATAGCTCAGTAGGAAAATTCAGTGGAGAAAAGAGGCTGAAATAAGGATAGCTCAGTGAGGAAATTCAGTGTAGAAAAGAGGCTGAATAATTCAGCCAGAAGGTAAGAGAAAGAACGACATGGTGAGACCAAGTTTCGGTGAACAAGGCCCGCACTTTATTTTCCAAAATAGTTTTTATACCTTAAGTTATGCATAGAGGATAATGGGGGAAGGGGTAGAGTCATGCAGTAAGCCAGGCTTTCTTCCTGCAAACTTATCATATGCAAAAGTTTA…	intronic	gene-CNTNAP2
4	113000000	112810190	T	TGCTTAGTGCCGGGGACCAGCCCCGGCTGATCCAGGGTATTCGAAGGAGAGACGGCGTCGGCGAGGGTCAGGATACGATAGCTTCAATTAGGTATTAATTAAAGATATAAAGAGTAATAGAATAAGGATAGCTCAGTAGGAAAATTCAGTGGAGAAAAGAGGCTGAGTAGCTTGGTTTACGCGGGAGACCAATAAAACTTCAAGACAAGAAGTTTGCACCACTTACGTAGGCCGCAGGCATCCTTCCGTTCTCCCGAAGGAGAGGAGACACTGAGGCCTCCCCGGTCAGATCTTAGAAGCCCAGGCATAATTAGTAAGCATGGTGGGTTCCGCGCTCCAGATGGAGACTCAACCAGAGTGAGAGAGAGAGCGACATGGGGAGACCAGTATTTCGAGAAA…	intronic	gene-ZNF775
4	113000000	113166712	GCTATCCGAGAGGTTGCCTGCGGGGAGCGAGCTCCGCCCGTGGCAAAGGTCATGAGGAAGGAGGCTTGGCATACTCAAAGGTGGGATCAAGCCTCAGGAGTCTCCCTGGAAATTCTCGAGCATCTACCCCCAAAACCAGAGTCTGCCTACTTCCTGCTTTGTGCTTTCACCTACACCTCAGACTTTATGGGGGCCTGTCTCCCACTACCTCTCTCTGAAAAAAGAGTTAGCTTACAGCTCCAGTTAATAATTCCTGGGTGTGACAGTGTTTCAACCTACAAACTCCTTTGGAAATCCTCTAGGCTGCCTGAATAGGTTTTTCCGGCCACATGTGATTGCTCAGAGCCTCCCAACTGTGAGAGGCATGAGATGTTCTAAACTGTCTAAATACAGATTCCT…	G	intronic	gene-LOC101902675,gene-LOC768255
4	115000000	115282351	T	TAAATTGTGTTGGGGGCCAGAGTGAGGTACTCCGCCCATGGCAAAGGTCATGAGGAAGGAGGCTCGACATACGCAAAGGCGGGATCGAGCCTCAGGAGTCCCCCTGGAAATCCCCGAGTGTCTACCCCCATAACCAGAGCCTGCCTACTTTACTACTTTGTGCTCTTACCTACACCTCTGACTTTACGGGGGGCTGTCCCCCACGACCTCTTTCGGAGAAGGAGTTAACCTAGAGCTCCAGTTAATAATAATTCCTGGGCGTGATAAGAGTGTTTTAACCTACAAACTCCTCTGAAGGTTCTCTAGCCTGCCTGACAGGCTCGTCGGGCCACATGTGATTGCTCACAGCCTCCCAACCGTGAGAGGCACGAGATGCTTTAAACCCTCTAAAAACAGGTT…	intergenic	gene-ACTR3B(dist=92837),gene-TRNAG-CCC-31(dist=247990)
4	119000000	119263027	TACCAAGGTGCGGGGAGCGAGCTCCGCCTCTGGCAAAGGTCATGAGGAAGGAGGCTTGGCATACGCAAAGGCGGGATCAAGCCTCAGGAGTCTCCCTGGAAATTCTCGAGCAATCTACCCCCAAAACCAGAGTCTGCCTACTTTCTGCTTTGTGCTTTCACCTACACCTCTGACTTTACGGGGGGCTGTCCCCCACTACCTCTCTGAAAAAAGAGTTAGCTTATAGCTCCAGTTAATAATTCCTGGGTGTGACAGTGTTTCAACCTACAAACTCCCTTGGAAGTCCTCTAGCCTGCCTGAATAGGTTTTTCCGGCCACATGTGATTGCTCAGAGCCTCCAAACTGTGAGAGGCATGAGATGTTCTAAACTGTCTAAATACGGATTCCTTTGAGCAGTCT…	T	intronic	gene-PTPRN2
5	1937293	1938178	GCGCCACCTGCCGGGGACCAGCCCCGGCTGATCCAGGGTATTCGAAGGAGAGACAGCGTAGGCGAAGATCAGGAAACAATTGCTTAATTAAACATTAATTAAGGATATAAAGAGTGATAGAATAAGGATAGCTCAGTAGGAAAATTCAGTGGAGAAAAGAGGCTGAGTAGCTTGGTTTACGTGGGAGACCAATAAAACTTCAAGACAAGAAGTTTGCACCACTTACGTAGGCCACAGGCGTCCTTCCGTTCTCCCGAAGGAGAGGAGACACTGAGGCCTCCCCGGTCGGATCTTAGAAGCCCAGGCATAATTAGTAAGCATGGTGGGTTCCACGCTCCAGATGGAGACTCAGCCAGAGTGAGAGAGAGAGTGAGACATGGGGAGACCAGTATTTCGAGA…	GA	intronic	gene-TRHDE
5	1937293	1938706	GCGCCACCTGCCGGGGACCAGCCCCGGCTGATCCAGGGTATTCGAAGGAGAGACAGCGTAGGCGAAGATCAGGAAACAATTGCTTAATTAAACATTAATTAAGGATATAAAGAGTGATAGAATAAGGATAGCTCAGTAGGAAAATTCAGTGGAGAAAAGAGGCTGAGTAGCTTGGTTTACGTGGGAGACCAATAAAACTTCAAGACAAGAAGTTTGCACCACTTACGTAGGCCACAGGCGTCCTTCCGTTCTCCCGAAGGAGAGGAGACACTGAGGCCTCCCCGGTCGGATCTTAGAAGCCCAGGCATAATTAGTAAGCATGGTGGGTTCCACGCTCCAGATGGAGACTCAGCCAGAGTGAGAGAGAGAGTGAGACATGGGGAGACCAGTATTTCGAGA…	G	intronic	gene-TRHDE
5	2895096	2896385	GCACCAAACTGCTGGGGACCTGCCCCGGCTGATCCAGGGTATTCGAAGCGGGGACGGCGTCGGCGACCTATTTATTTAAATATTTTATCAAAGATATAAAGAGTAATAGGATGAGGATAGCTCAGTAGGAAAATTCAGTGGAGAAAAGAGGCTGAGTAGCTTGGTTTACGCGGGAGACCAATAAAACTTCAAGACAAGAAGTTTGCACCACTTACGTAGGCCGCAGGCGTCCTTCCGTTCTCCCGAAGGAGAGGAGACACTGAGGCCTCCCCGGTCGGATCTTAGAAGCCCAGGCATAATTAGTAAGCATGGCGGGTTCCGCGCTCCAGATGGAGACTCAGCCAGAGTGAGAGAGAGAGCGACATGGGGAGACCAGTATTTCGAGAAACTGATCCCAAT…	G	intergenic	gene-TRHDE(dist=524503),gene-ATXN7L3B(dist=1172150)
5	4228364	4228364	G	GGCAACCTGTTGGGGGCCAGAGTGAGGTACTCCGCCCGTGACAAAGGTCATGAGGAAGGAGGCTCGACATACGCAAAGGCGGGATCGAGCCTCAGGAGTCCCCCTGGAACTCCTCGAGCATCTACCCCCATAACCAGAGCCTGCCTACTTTACTACTTTGTGCTCACCTACACCTCTGACTTTACGGGGGGCTGTCCCCCACCACCTCTTTTGGAGAAGGAGTTAACTTAGAGCTCCAGTTTATAATAATTCCTGGGCGTGATAAGAGTGTTTTAACCTACAAACTCCTCTGAAGGTTCTCTAGCCTGCCTGACAGGCTCGTCCGGCCACATGTGATTGCTCACAGCCTCCCAACCGTGAGAGGCACAAGATGCTTTAAACCCTCTAAAAACGGGTTCT…	intergenic	gene-LOC523590(dist=46467),gene-TRNAY-GUA-6(dist=233199)
5	11313982	11314286	TGAGCATTACCTTACTAGCATGTGAGATGAGTGCAATTGCGTGGTAGTTTGAGCATTCTTTGGCATTGACTTTCTTAGGGATTGGAATGAAAACTGACCTTTTCCAGTCCTGTGGCCACTGCTGAGTTTTCCAAATTTGCTGGCATATTGAGTGCAGCACTTTCACAGCATCATCTTTCAGGATTTGAAATAGCTCAGCTGGAATTCCATCACCTCCACTAGCTTTGTTCGTAGTGATGCTTTCTAAGGCCCACTTGACTTCACATTGCAGGATGTCTGGCTCTAGGTCAGTGACCACACCATCA	T	intronic	gene-PPFIA2
5	12411852	12411853	CT	CCCATTTGCCAGAGTACATTAGGTTTGAGACCGCGAGGGTTAACTCCCATAGGTAGACTATTATAAACAGTGGGGCAC	intronic	gene-TMTC2
5	22170967	22171580	AGATGCGGGGAGCGAGCTCCGCCCCTGGCAAAGGTCATGAGGAAGGAGGCTCGGCATATGCAAAGGCGGGATCAAGCCTCAGGAGTCTCCCTGGAAATTCTCGAGCAATCTACCCCCCAAACCAGAGTCTGCCTACTTTCTGCTTTGTGCTTTCACCTACACCTCTGACTTTACGGGGGGCTGTCCCCCACTACCTCTCTGAAAAAAGAGTTAGCTTACAGCTCCAGTTAATAATTCCTGGGTGTGACAGTGTTTCAACCTACAAACTCCCTTGGAAGTCCTCTAGCCTGCCTGAATAGGTTTTTCCGGCCACATGTGATTGCTCAGAGCCTCCAAACTGTGAGAGGCATGAGATGTTCTAAACTGTCTAAATACAGATTCCTTTGAGCAGTTAAAAGA…	A	intergenic	gene-BTG1(dist=156122),gene-PLEKHG7(dist=392767)
5	22170967	22172068	AGATGCGGGGAGCGAGCTCCGCCCCTGGCAAAGGTCATGAGGAAGGAGGCTCGGCATATGCAAAGGCGGGATCAAGCCTCAGGAGTCTCCCTGGAAATTCTCGAGCAATCTACCCCCCAAACCAGAGTCTGCCTACTTTCTGCTTTGTGCTTTCACCTACACCTCTGACTTTACGGGGGGCTGTCCCCCACTACCTCTCTGAAAAAAGAGTTAGCTTACAGCTCCAGTTAATAATTCCTGGGTGTGACAGTGTTTCAACCTACAAACTCCCTTGGAAGTCCTCTAGCCTGCCTGAATAGGTTTTTCCGGCCACATGTGATTGCTCAGAGCCTCCAAACTGTGAGAGGCATGAGATGTTCTAAACTGTCTAAATACAGATTCCTTTGAGCAGTTAAAAGA…	A	intergenic	gene-BTG1(dist=156122),gene-PLEKHG7(dist=392279)
5	22171592	22172066	TTTGGAGGCTGGTGCCTGACTTTAGAATAATCACCTTTAGAGAAAAAGGCCTCCGGGCCAGAAGATGATGCAAATCACCTAAACTTTTGCATATGATAAGTTTGCAGAAAAAAAGCCTGGCTTGCTGCATGACTCTACCCCTTCCCCCATTATCCTCTATGCATAACTTAAGGTATAAAAACTACTTTGGAAAATAAAGTGCGGGCCTTGTTCACCGAAACTTGGTCTCACCATGTCGTTCTTTCTCTTACCTTCTGGCTGAATTATTCAGCCTCTTTTCTCCACTGAATTTCCTCACTGAGCTATCCTTATTTCAGACTCTTTTCTCCACTGAATTTCTTCACTGAGCTATCCTCATTCTATTACTCTTTATATCCTTAATTAACGTTTAATTAAGCA…	T	intergenic	gene-BTG1(dist=156747),gene-PLEKHG7(dist=392281)
5	22919387	22919387	A	ACACTTCAATGTTGGGGGCCAGAGTGAGGTACTCCGCCCGTGACAAAGGTCATGAGGAAGGAGGCTCGACATACGCAAAGGCGGGATCGAGCCTCAGGAGTCCCCCTGGAAATCCTCAAGCATCTACCCCCATAACCAGAGCCTGCCTACTTTACTACTTTGTGCTCTTACCTACACCTCTGACTTTACGGGGGGCTGTCCCCCACCACCTCTTTCGGAGAAGGAGTTAACCTAGAGCTCCAGTCAATAAAAACTCTTGGGTGTGACAAGAGTGTTTTAACCTACAAACTCCTCTGAAGGTTCTCTAGCCTGCCTGACAGGCTCGTCCGGCCACATGTGATTGCTCACAGCCTCCCAACCGTGAGAGGCACGAGATGCTTTAAACCCTCTAAAAACAGG…	intergenic	gene-EEA1(dist=141660),gene-NUDT4(dist=272278)
5	22960295	22960295	A	AATGATATTGCGGGGAGCCGGTGAGGCATTCCACTCGTGACAAAGGTCATGAGGAAGGAGGCTCGGCATACGCAAAGGCGGGATCGAGCCTCAGGAGTCCCCCCGGATATTCTCGAGCATTTTCCCCCCAAAAAAACCAGAGTCTGCCTACTTTATTGCTTTGTGCTCTCACCTCTGACTTTACTGGGGGCTGTCCCCTACCACCGTCTCTCTCTCTCTGTGTCAAAGAGTTAACTTACAGCTCCAATTAATAAAGTTCCTGGGCAATTAGGAGTGTTTAAATCCAAACCCCTCTGATGGCTCTCTAACTCGCCTGACAAGTTTACCCGGACTCCTGCAGCTATGCATACGATTGTTTACAGTCTCCCAGCCTCGAGAGGCATGGGAAGCTTAAGATAT…	intergenic	gene-EEA1(dist=182568),gene-NUDT4(dist=231370)
5	25575373	25575373	G	GATTACTTGCGGGGAGCCGGTGAGGCATTCCACTCGTGACAAAGGTCATGAGGAAGGAGGCTCGGCATACGCAAAGGCGGGATCGAGCCTCAGGAGTCCCCCCGGATATTCTCGAGCATTTTCCCCCAAAAAACCAGAGTCTGCCTACTTTATTGCTTTGTGCTCTCACCTCTGACTTTACTGGGGGCTGTCCCCTACCACCATCTCTCTCTCTGTCAAAGAGTTAACTTACAGCTCCAATTAATAAAGTTCCTGGGCAATTAGGAGTGTTTAAATCCAAACCCCTCTGATGGCTCTCTAACTCGCCTGACAAGTTTACCCGGACTCCTGCAGCTATGCATACGATTGTTTACAGTCTCCCAGCCTCGAGAGGCATGGGAAGCTTAAGATATTCAAATA…	intronic	gene-NCKAP1L
5	28218083	28219195	GGGCAGGAGGGTGCGGGGAGCGAGCTCCGCCCCTGGCAAAGGTCATGAGAAAGGAGGCTTAGCATACGCAAAGGCGGGATCAAGCCTCAGGAGTCTCCCTGGAAATTCTCGAGCAATCTACCCCCAAAACCAGAGTCTGCCTACTTTCTGCTTTGTGCTTTCACCTACACCTCTGACTTTACGGGGGGCTGTCCCCCACTACCTCTCTGAAAAAAGAGTTAGCTTACAGCTCCAGTTAATAATTCCTGGGTGTGACAGTGTTCAACCTACAAACTCCCTTGGAAGTCCTCTAGCCTGCCTGAATAGGTTTTTCCGGCCACATGTGATTGCTCAGAGCCTCCAAACTGTGAGAGGCATGAAATGTTCTAAACTGTCTAAATACAGATTCCTTTGAGCAGT…	G	intronic	gene-SCN8A
5	31041195	31041195	T	TACCAGACTGCCGGGGACCAGCCCCGGCTGATCCAGGGTATTCGAAGCGGGGACGGCGTCGGCGAGGATCAGGAAACAATTGCTTAATTAAACGTTAATTAAGGATATAAAGAGTAATAGAATGAGGATAGCTCAGTAGGAAAATTCAGTAGAGAAGAGAGGCTGAAATAAGGATAGCTCAGTGAGGAAATTCAGTGTAGAAAAGAGGCTGAATAATTCAGCCAGAAGGTAAGAGAAAGAACGACATGGTGAGACCAAGTTTCGGTGAACAAGGCCCGCACTTTATTTTCCAAAGTAGTTTTTATACCTTAAGTTATGCATAGAGGATAATGGGGGAAGGGGTAGAGTCCTGCAGTAAGCCAGGCTTTCTTCCTGCAAACTTATCATATGCAAAAGTTT…	intergenic	gene-TEX49(dist=2595),gene-CCNT1(dist=13190)
5	33519786	33521086	TCTAGTGTTGGGGGCCAGAGTGAGGTACTCCGCCCGTGACAAAGGTCATGAGGAAGGAGGCTCGACATACGCAAAGGCGGGATCGAGCCTCAGGAGTCCCCCTGGAACTCCTCGAGCATCTACCCCCATAACCAGAGCCTGCCTACTTTACTACTTTGTGCTCACCTACACCTCTGACTTTACGGGGGGCTGTCCCCCACCACCTCTTTTGGAGAAGGAGTTAACTTAGAGCTCCAGTTTATAATAATTCCTGGGCGTGATAAGAGTGTTTTAACCTACAAACTCCTCTGAAGGTTCTCTAGCCTGCCTGACAGGCTCGTCCGGCCACATGTGATTGCTCACAGCCTCCCAACCGTGAGAGGCACAAGATGCTTTAAACCCTCTAAAAACGGGTTCTTT…	T	intergenic	gene-SLC38A4(dist=33731),gene-LOC112446800(dist=320597)
5	38734008	38734008	T	TGAAATTTGCAACATGCTCTTTTCATAATAAATATTTGCTCTTTTCGTAATAAATATTCTAAATACTGATCTGGCTGGAACTACTGCAATGCTTCGTCATTGATGCCTGGAGCAATTAAATGCAAAACCATTAGTCAAATGGAAGGACCTCCTCTCAGGACAATGGAAGGGTCCTGACCCATTATTAACTAGCGGTCGAGGATGTGCTTGTATTTTTCCACAGGATGCAGATTCTCCAATTTAGATCCAGGACAGGTTGATTCGCCATGTTGCAGACCCCCAGACATCCAGTTCCCCCATAGCTTCGATCACAAAAGAGGAGCCCGCCAGAAGGGGAGGCAAGATAAACATCGAGATCCCGGCGGGACCAACGGGGCTGCTGCAGTGCAAACTCCAACC…	intergenic	gene-GXYLT1(dist=137906),gene-PDZRN4(dist=466818)
5	40484848	40486143	CATTAGGTGCGGGGAGCCGGTGAGGCATTCCACTCGTGACAAAGGTTATGAGGAAGGAGGCTCGGCATACGCAAAGGCGGGATCGAGCCTCAGGAGTCCCCCCGGATATTCTTGAGCATTTTCCCCCAAAAAACCAGAGTCTGCCTACTTTATTGCTTTGTGCTCTCACCTCTGACTTTACTGGGGGCTGTCCCCTACCACCGTCTCTCTCTCTCTCTGTGTCAAAGAGTTAACTTACAGCTCCAATTAATAAAGTTCCTGGGCAATTAGGAGTATTTAAATCCAAACCCCTCTGATGGCTCTCTAACTCGCCTGACAAGTTTACCCGGACTTCTGCAGCTATGCATACGATTGTTTACAGTCTCCCAGGAGAGGCATGGGAAGCTTAAGATATTCAAA…	C	intronic	gene-LRRK2
5	45484948	45484948	T	TGTGAGCTGCCGGGAGCCGGCATATTGCATATTGAGTGCATATTGCATATTGAGTGCAGCACTTTTCAGGATCTGGAATAGCTCAACTGGAATTCTATCACTGCCGGTAGCCAGCGTGAGGAACTCCGCCCATGACAAAGGTCACGAGGAAGGAGGCTCGGCATACGCAAAGGCGGGATCGAGCTTCAGGAGTCCCCCTGGAAATTCTCGAGCAATCTACCCCCAAAACCAGAGTCTGCCTACTTTCTGCTTTGTGCTTTCACCTACACCTCTGACTTTACGGGGGGCTGTCCCCCACTACCTCTCTGAAAAAAGAGTTAGCTTACAGCTCCAGTTAATAATTCCTGGGTGTGACAGTGTTTAACCTACAAACTCCTTTGGAAATCCTCTAGCCTGCCT…	intergenic	gene-MDM1(dist=9435),gene-IL22(dist=38461)
5	51108575	51108575	T	TGGTTGGATCTCCTTGCAGTCCAAGGGACTCTCAAGAGTCTTCTCCAACACCACAGTTCAAAAGCATCAATTCTTCGGTGCTCAGCTTTCTTTATGGTCCAACTCTCACATCCATACATGACTACTGGAAAAACCATAGCCTTGACTAGACGGACCTTTGTTGACAAAGTAATGTCTCTGCTTTTTAACATGCTGTCTAGTGCTAGGGTCCAGCCCCGGTGGATCCAGGGAACTCGAGGCGGGGACAGCATCGGCGAGGATCAGGAAACAATTGCTTAATTAAACGTTAATTAAGGATATAAAGAGTGGTTAAATAAGGATAGCTCAGTGAGGAAATTCAGTGGAGAAAAGAGGCTGAAATAAGGATAGCTCAGTGAGGAAATTCAGTGGAGAAAAGAG…	intergenic	gene-MON2(dist=2883),gene-USP15(dist=38537)
5	51108575	51108575	T	TGGTTGGATCTCCTTGCAGTCCAAGGGACTCTCAAGAGTCTTCTCCAACACCACAGTTCAAAAGCATCAATTCTTCGGTGCTCAGCTTTCTTTATGGTCCAACTCTCACATCCATACATGACTACTGGAAAAACCATAGCCTTGACTAGACGGACCTTTGTTGACAAAGTAATGTCTCTGCTTTTTAACATGCTGTCTAGTGCTGGGGTCCAGCCCCGGTGGATCCAGGGAATTCGAGGCGGGGACAGCATAGGCGAGGATCAGGAAACAATTGCTTAATTAAACGTTAATTAAGGATATAAAGAGTGGTTAAATAAGGATAGCTCAGTGAGGAAATTCAGTGGAGAAAAGAGGCTGAAATAAGGATAGCTCAGTGAGGAAATTCAGTGGAGAAAAGAG…	intergenic	gene-MON2(dist=2883),gene-USP15(dist=38537)
5	58575435	58575435	C	CAAAACCTGCCAGGGTCCAGCCCCGGCTGATCCAGGGTATTCGAAGCGGGGACAGCTTCGGGGAGGATCAGGATACAATACCTTTAATTAGATATTAATTAAAGATGTAAAGAGTAATAGAATGAGGATAGCTCAGTAGGAAAATTCAGTGGAGAAAAGAGGCTGAATAGCTTGGTTTATGTGGGATGCCAATAAAACTTCAAGACAAGAAGTTTGCACCACTTACATAGGCCGCAGGCGTCCTTCTGTTCTCCCGAAGGAGAGGAGACACTGAGGCCTCCCCGGTCGGATCTTAGAAGCCCAGGCATAATTAGTAAGCATGGCGGGTTCCGCGCTCAGATGGAGACTCAGCCAGAGTGAGAGAGAGAGTGACATGGGGAGACCAGTATTTCGAGAAAC…	intergenic	gene-OR6C75(dist=23958),gene-LOC100138866(dist=19384)
5	59078077	59078077	G	GGTTATCTGCCGGGGACCAGCCCCGGCTGATCCAGGGTATTCGAAGGAGAGACGGCGTAGGCGAAGATCAGGAAACAATTGCTTAATTAAATGTTAATTAAGGATATAAAGAGTAATAGAATGAGGATAGCTCAGTAAAATTCAGTGAAGAAAAGAGGCTGAAATAAGGATAGCTCAGTGAGGAAATTCAGTGGAGAAAAGAGGCTGAAATAAGGATAGCTCAGTGAGGAAATTTAGTGCAGAAAAGAGGCTGAATAATTCAGCCAGAAGGTAAGAGAAAGAACGACATGGTGAGACCAAGTTTCGGTGAACAAGGCCCGCACTTTATTTTTCAAAGTAGTTTTTATACCTTAAGTTATGCACAGAGGATAATGGGGGAAGGGGTAGAGTCTTGCAGCA…	intergenic	gene-LOC788242(dist=1672),gene-LOC788258(dist=38039)
5	60914831	60918962	GCCCAAGTGTTGGGGGCCAGAGTGAGGTACTCCGCCCGTGACAAAGGTCATGAGGAAGGAGGCTCGACATACGCAAAGGCGGGATCGAGCCTCAGGAGTCCCCCTGGAACTCCTCGAGCATCTACCCCCATAACCAGAGCCTGCCTACTTTACTACTTTGTGCTCACCTACACCTCTGACTTTACGGGGGGCTGTCCCCCACCACCTCTTTTGGAGAAGGAGTTAACTTAGAGCTCCAGTTTATAATAATTCCTGGGCATGATAAGAGTGTTTTAACCTACAAACTCCTCTGAAGGTTCTCTAGCCTGCCTGACAGGCTCGTCCGGCCACATGTGATTGCTCACAGCCTCCCAACCGTGAGAGGCACAAGATGCTTTAAACCCTCTAAAAACGGGTTCT…	G	intronic	gene-CFAP54
5	66002343	66003632	TAGTTATCTGTTGGGGGCCAGAGTGAGGTACTCCGCCCATGGCAAAGGTCATGAGGAAGGAGGCTCGACATACGCAAAGGCGGGATCGAGCCTCAGGAGTCCCCCTGGAAATCCTCGAGCGTCTACCCCATAACCAGAGCCTGCCTACTTTACTACTTTGTGCTCTTACCTACACCTCTGACTTTACGGGGGGCTGTCCCCCACCACCTCTTTCGGAGAAGGAGTTAACCTAGAGCTCCAGTCAATAAAAACTCTTGGGTGTGGCAAGAGTGTTTTAACCTACAAACTCCTCTGAAGGTTCTCTGGCCTGCCTGACAGGCTCGTCCGGCCACATGTGATTGCTCACAGCCTCCCAACCATGAGAGGCACGAGATGCTTTAAACCTTCTAAAAACAGGTT…	T	intronic	gene-PARPBP
5	67547521	67548818	GGGTATCTGTTGGGGGCCAGAGTGAGGTACTCCGCCCGTGACAAAGGTCATGAGGAAGGAGGCTCAACATACGCAAAGGCGGGATCGAGCCTCAGGAGTCCCCCTGGAACTCCTCGAGCATCTACCCCCATAACCAGAGCCTGCCTACTTTACTACTTTGTGCTCTCACCTACATCTCTGACTTTACGGGGGGCTGTTCCCCACCACCTCTTTCGGAGAAGGAGTTAACCTAGAGCTCCAGTCAATAAAAACTCTTGGGTGTGACAAGAGTGTTTTAACCTACAAACTCCTCTGAAGGTTCTCTAGCCTGCCTGACAGGCTCGTCCGGCCACATGTGATTGCTCACAGCCTCCCAACCGTGAGAGGCACGAGATGCTTTAAACCCTCTAAAAACAGGTT…	G	intronic	gene-LOC505479
5	74364339	74364339	A	AACGTGGCTGTTGGGGGCCAGAGTGAGGTACTCCACCCATGACAAAGGTCATGAGGAAGGAGGCTCGACATACGCAAAGGCGGGATCGAGCCTCAGGAGTCCCCCTGGAACTCCTCGAGCATCTACCCCCATAACCAGAGCCTGCCTACTTTACCACTTTGTGCTCTCACCTACATCTCTGACTTTACGGGGGGGCTGTCCCCCACCACCTCTTTCGGAGAAGGAGTTAACCTAGAGCTCCAGTTAATAAAAACTCCTGGGCGTGACAAGAGTGTTTTAACCTACAAACTCCTCTGAAGGTTCTCTAGCCTGCCTGACAGGCTTGTCCGGCCACATGTGATTGCTCACAGCCTCCCAACTGTGAGAGGCACGAGATGCTTTAAACCTTCTAAAAACAGG…	intergenic	gene-LOC531557(dist=2377),NONE(dist=NONE)
5	74591707	74593012	CCATGGTTGCCGAGGACCAGCCCCGGCTGATCCAGGGTATTCGAAGGGGAGACGGCGTCGGCGACTATTTATTTATTTATCAAAGATATAAAGAGTAATAGAATGAGGATAGCTCAGTAGGAAAATTCAGTGGAGAAAAGAAGCTGAGTAGCTTGGTTTACGCGGGAGACCAATAAAACTTCAAGACAAGAAGTTTGCACCACTTACGTAGGCCGCAGGCGCCCTCTCGAATAGCGGAAGGTGCCTCACCCTAGACACCTTCTCGAGTGGGTCTTAGAACCCCAGGCATAATTAGTAAGCGTGGTGGGTTCCGTGCTCCAGATGGAGACTCAGCTGGAAGTTAAAGGGAAGAATGACATGGGGAGACCAAGCGTTGGTGAGCAAGGCCCGTAGCTTTAT…	C	intronic	gene-LOC112446725
5	74641891	74643013	GCGTGCGGGGAGCGAGCTCCATCCCTGGCAAAGGTCATGAGGAAGGAGGCTTGGCATACGCAAAGGCGGGATCAAGCCTCAGGAGTCTCCCTGGAAATTCTCGAGCAATCTACCCCAAAACCAAAGTCTGCCTACTTTCTGCTTTGTGCTTTCACCTACACCTCTGACTTTACGGGGGGCTGTCCCCCACTACCTCTCTCTGAAAAAAGAGTTAGCTTACAGCTCCAGTTAATAATTCCTGGGTGTGACAGTGTTTAACCTACAAACTCCTTTGGAAATCCTCTAGCCTGCCTGAATAGGTTTTTCCAGCCACATGTGATTGTTCAGAGCCTCCCAACTGTGAGAGACATGAGATGTTCTAAACTGTCTAAACATAGATTCTTTTGAGAAGTTAAAAGA…	G	intergenic	gene-LOC112446726(dist=7869),gene-LOC619179(dist=13055)
5	76120853	76120853	C	CATGGACTGCCGAGGACCAGCCCCGGCTGATCCAGGGTATTCGAAGGGGAGACGGCGTCGGCGACTATTTATATGCTAATTAGGGATATAGAGAACAATAGAATGAGGATAGCTCAGTAGGAAATTTCAGTGGAGAAAAGAAGCTGAGTAGCTTGGTTTACGCGGGAGACCAATAAAACTTCAAGACAAGAAGTTTGCACCACTTACGTAGGCCGCAGGCGCCCTCTCGAATAGCGGAAGGTGTCTCACCCTAGACACCTTCTCGAGTGGGTCTTAGAAGCCCAGGCATGATTAGTAAGCGTGGTGGGTTCCGCGCTCCAGATGGAGACTCAGCTGGAAGTTAAAAGAATGACATGGGGAGACCAAGCGTTGGTGAGCAAGGCCCGTAGCTTTATTTTT…	intergenic	gene-ALG10(dist=7615),gene-SYT10(dist=181040)
5	76235602	76235835	GTCAGAGAGAGCTAGATGGTGGTGGGGGACAGCCCCCAGTAAAGTCAGAGGTGAGAGCACAAAGCAATAAATAGAGACTCGTTTTTGAGGTAGATGCTGAGATATCAGGGACTCCTGAGGCTCAATCCGCTTTGCGTATGCGAGCCTTCCTCATGACTTTCATGAGTGGAGTGCTCTCGCGGTTCTGCATATATATATATATATATATATATATATATATATATATGTATTAGT	G	intergenic	gene-ALG10(dist=122364),gene-SYT10(dist=66058)
5	77579061	77580360	TCTTCCTTGCCGGGAGCCGGTGAGGCATTCTACTCGTGACAAAGGTCATGAGGAAGGAGGCTCGGCATACGCAAAGGCGGGATCGAGCCTCAGGAGTCCGCCCGGATATTCTCGAGCATTTTCCCCCAAATAACCAGAGTCTGCCTACTCTATTGCTTTGTGCTCTCACCTCTGACTTTACTGGGGGCTGTCCCCTACCACCATCTCGCTCTCTCTCTGTCAAAGAGTTAACTTACAGCTCCAATTAATAAAGTTCCTGGGCAATTAGGAGTGTTTAAATCCAAACCCCTCAGATGGCTCTCTAACTCGCCTGACAAGTTTACCCGGACTCCTGCAGCTATGCATACGATTGTTTACAGTCTCCTAGCCTCCAGAGGCACGGGAAGCTTAAGATATTCA…	T	intronic	gene-BICD1
5	91481180	91482475	GGGTACCTGCCGGGGACCAGCCCCAGCTGATCCAGGGTATTCGAAGGAGAGACGGCCTAGGCGACTATTTACATGCTAATTAGAGATATAGAGAACAATAGAATGAGGATAGCTCAGTAGGAAAATTCAGTGGAGAAAAGAAGCTGAGTAGCTTGGTTTACGCGGGAGACCAATAAAACTTCAAGACAAGAAGTTTGCACCACTGACGTAGGCCGCAGGCGCCCTCTCGAATAGCGGAAGGTGTCTCACCCTAGACTCCTTCTCGAGTGGGTCTTAGAAGCCCAGGCATGATTAGTCAGCGTGGTGGGTTCCGCGCTCCAGATGGAGACTCAGCTGGAAGTTAAAGGGAAGAATGACATGGGGAGACCAAGCGCTGGTAAACAAGGCCCGTAGCTTTAT…	G	intronic	gene-PIK3C2G
5	98530493	98530493	C	CATTTATTGCGGGGAGCGAGCTCCGCCTCTGGCAAAGGTCATGAGGAAGGAGGCTTGGCATACGCAAAGGCGGGATCAAGCCTCAGGAGTCTCCCTGGAAATTCTCGAGCAATCTACCCCCAAAACCAGAGTCTGCCTACTTTCTGCTTTGTGCTTTCACCTACACCTCTGACTTTACGGGGGGCTGTCCCCCACGACCTCTCTGAAAAAAGAGTTAGCTTACAGCTCCAGTTAATAATTCCTGGGTGTGACAGTGTTTAACCTACAAACTCCTTTGGAAATCCTCTAGCCTGCTTGAATAGGTTTTTCCGGCCACATGTGATTGTTCAGAGCCTCCCAACTGTGAGAGGCAGGAGATGTTCTAAACTGTCTAAACACAGATTCTTTTGAGTAGTTAAA…	intronic	gene-LOC112446742
5	99194669	99194669	T	TTAACAGCATCATTCTTTAGGATTTGGGATAGCTCAGCTGAAATTGGGAGAAGGCAATGGCACCCCACTCCAGTACTATTGCCCGGAAAATCCCATGGATGGAGGAGCCTGGTA	intergenic	gene-LOC100140174(dist=23453),gene-LOC112446743(dist=53876)
5	99196385	99196385	A	AATGAAAACTGACCTTTTCCAGTGCTGTGGCCACTGCTGAGTTTTCCAAATTTGCTGGCATATTGAGGGCAGCACTTTCACTGCATCATCTTTCAGGATTTGGAATAGCTCATCTGGAATTCCATCACCTCCACTAGCTTTGTTCGTAGTGATGCTTTCTAGGGCCCACTTGACTTCACATTCCAGGATGTCTGGCTCTAGGTGAGTGATCACTCCATCCTGATTATCTTGGTCATGAAGTTCTTTTTTGTACAGTTCTTCTGTGTATTCTTGCCACCTCTTCTTAATATCTTCTGC	intergenic	gene-LOC100140174(dist=25169),gene-LOC112446743(dist=52160)
5	99303904	99303904	A	AAGGAACATGCTGGGGACCAGCCCCAGCTGATCCAGGGTATTCGAAGGAGAGACGGCCTAGGCGACTATTTATATGCTAATTAGAGATATAGAGAACAATAGAATGAGGATAGCTCAGTAGGAAAATTCAGTGGAGAAAAGAAGCTGAGTAGCTTGGTTTACGCGGGAGACCAATAAAACTTCAAGACAAGAAGTTTGCACCACTTACGTAGGCCGCAGGCGCCCCCTCGAATAGCGGAAGGTGTCTCACCCTAGACTCCTTCTCGAGTGGGTCTTAGAAGCCCAGGCATAATTAGTAAGCGTGGTGGGTTCCGCGCTCCAGATGGAGACTCAGCTGGAAGTTAAAGGGAAGAATGACATGGGGAGACCAAGCGTTGGTGAGCAAGGCCCGTAGCTTTA…	intergenic	gene-KLRC1(dist=12916),gene-LOC104970137(dist=24744)
5	102000000	102273001	TTGCCGAGGACCAGCCCCGGCTGATCCAGGGTATTCGAAGGGGAGACGGCGTCGGCGACTATTTATATGCTAATTAGAGATATAGAGAACAATAGAATGAGGATAGCTCAGTAGGAAAATTCAGTGGAGAAAAGAAGCTGAGTAGCTTGGTTTACGTGGGAGACCAATAAAACTTCAAGACAAGAAGTTTGCACCACTTACGTAGGTCGCAGGCGCCCTCTCGAATAGCGGAAGGTGTCTCACCCTAGACACCTTCTCGAGTGGGTCTTAGAAGCCCAGGCATGATTAGTAAGCGTGGTGGGTTCCGCGCTCCAGATGGAGACTCAGCTGGAAGTTAAAAGAAAGAATGACATGGGGAGACCAAGCGTTGGTGAGCAAGGCCCGTAGCTTTATTTTTAA…	T	intergenic	gene-WC1-12(dist=4117),gene-LOC100335428(dist=61976)
5	102000000	102276617	CCGGGGACCAGCCCCGGCTGATCCAGGGTATTCGAAGGAGAGACGGCATAGGCGAGGATCAGGATACAATAGCTTCAATTAGATATTAATTAAAGATATAAAGAGTAATAGAATAAGGATAGCTCAGTAGGAAAATTCAGTGGAGAAAAGAGGCTGAGTAGCTTGGTTTACGCGGGAGACCAATAAAACTTCAAGACAAGAAGTTTGCACCACTTACGTAGGCCGCAGGCGTCCTTCCGTTCTCCCGAAGGAGAGGAGACACTGAGGCCTCCCCCGTCGGATCTTAGAAGCCCAGGCATAATTAGTAAGCATGGTGGGTTCCGCGCTCCAGATGGAGACTCAGCCAGAGTGAGAGAGAGAGCGACATGGGGAGACCAGTATTTCGAGAAACTGATCCCA…	C	intergenic	gene-WC1-12(dist=7742),gene-LOC100335428(dist=58360)
5	102000000	102328190	G	GCACCCCTGCGGGGAGCGAGCTCCGCCCCTGGCAAAGGTCATGAGGAAGGAGGCTTGGCATACGCAAAGGCGGAATCAAGCCTCAGGAGTCTCCCTGGAAATTCTCGAGCAATCTACCTCCAAAACCAGAGTCTGCCTACTTTCTGCTTTGTGCTTTCACCTACACCTCTGACTTTACGGGGGGCTGTCCCCCACTACCTCTCTGAAAAAAGAGTTAGCTTACAGCTCCAGTTAATAATTCCTGGGTGTGACAGTGTTTCAACCTACAAACTCCCTTGGAAGTCCTCTAGCCTGCCTGAATAGGTTTTTCTGGCCACATGTGATTGCTCAGAGCCTCCAAACTGTGAGAGGCATGAGATGTTCTAAACTGTCTAAATACAGATTCCTTTGAGCAGTTAA…	intergenic	gene-WC1-12(dist=60599),gene-LOC100335428(dist=6787)
5	103000000	102667441	TTAGAGTTGCCGGGAGCCGGCATATTGCATATTGAGTGCATATTGCATATTGAGTGCAGCACTTTCCACAGCATCATCTTTCAGGATCTGGAATAGCTCAACTGGAATTCTATCACTGCTGGGAGCCAGCGTGAGGAACTCTGCCCATGACAAAGGTCATGAGGAAGGAGGCTCGGCATACGCAAAGGCGGGATCGAGCCTCAGGGGTCCCCCTGGAAATTCTCGAGCATCTACCCCCAAAACCAGAGTCTGCCTACTTTCTGCTTTGTGCTTTCAGCTACACCTCTGACTTTACAGGGGGCTGTCCCCCACTACCTCTCTCTGAAAAAAGAGTTAGCTTACAGCTCCAGTTAATAATTCCTGGGTGTGACAGTGTTTCAACCTACAAACTCCTTTGGA…	T	intronic	gene-WC1.3
5	103000000	102667249	A	ATTCAGCCTCTTTTCTCCACTGAACTTCCTCACTGAGCTATCCTTATTTCAGCCTCTTTTCTCCACTGAATTTCCTCACTGAGCTATCCTTATTTCAGCCTCTTTTCTCCACTGAACTTCCTCACTGAGCTATCCTTAT	intronic	gene-WC1.3
5	110000000	110305213	T	TGTTTTGTGCCGGGGACCAGCCCCGGCTGATCCAGGGTATTCGAAGCGGGGACGGCGTCGGCGACCTATTTATTTAAATATTTTATCAAAGATAAAAAGAGTAATAGGATGAGGATAGCTCAGTAGGAAAATTCAGTGGAGAAAAGAGGCTGAGTAGCTTGGTTTACGCGGGAGACCAATAAAACTTCAAGACAAGAAGCTTGCACCACTTACGTAGGCCGCAGGCGTCCTTCCGTTCTCCCGAAGGAGAGGAGACACTGAGGCCTCCCCGGTCGGATCTTAGAAGCCCAGGCATAATTAGTAAGCATGGTGGGTTCCGCGCTCCAGATGGAGACTCAGCCAGAGTGAGAGAGAGAGCGACATGGGGAGACCAGTATTTCGAGAAACTGATCCCAATTC…	downstream	gene-CBY1
5	115000000	115208630	C	CCACCCCTCTAGGGGGCCGTTTTGCTATAAAACCAATTTTTTGTCTGGCCACCCCAATTACACCTATGGGGGTTTTATGGCAAAGGAATTGTCAAGCAGTTGTCAATTTAATTTTTAAAATTTACATTTTAAATTTTGGGATATGTTAATTTAGGTCTAATGTTTAGTTTAGGTCTGTGTATAAATTTAAATAATAAATGTATAACCTCCTTATCTCATTTTGGTAAACAAATATATCTAAATGCAAAATGTATTTATACATGGCAACAAGTATAAACTTATTGACATAATATACTTGAATTAATCTTTATAATTAATGTTAATTAATATATATTACAGCAATACAACACGTACACAGCTAATACCAGCCAACACAAACCAATGTACTGCAATACATGT…	intergenic	gene-RTL6(dist=74662),gene-PRR5(dist=59352)
5	116000000	115697637	C	CTGTGATTGCCGGGGACCAGCCCCGGCTGATCCAGGGTATTCGAAGGAGAGACGGCGTCGGCGAGGGTCAGGATACGATAGCTTCAATTAGATATTAATTAAAGATATAAAGAGTAATAGGATGAGGATAGCTCAGTAGGAAAATTCAGTGGAGAAAAGAGGCTGAGTGGCTTGGTTTACGCGGGAGACCAATAAAACTTCAAGACAAGAAGTTTGCACCACTTACGTAGGCCGCAGGCGTCCTTCCGTTCTCCCGAAGGAGAGGAGACACTGAGGCCTCCCCGGTTGGATCTTAGAAGCCCAGGCATAATTAGTAAGCATGGTGGGTTCCGCGCTCCAGATGGAGACTCAGCCAGAGTGAGAGAGAGAGCGACATGGGGAGACCAGTATTTCGAGAAA…	intronic	gene-UPK3A
5	119000000	118610902	CATCCATTGCCGGGGACCAGCCCCGGCTGATCCAGGGTATTCGAAGGAGAGATGGCATAGGCGAGGATCAGGATACAATAGCTTCAATTAGATATTAATTAAAGATATAAAGAGTAATAGAATAAGGATAGCTCAGTAGGAAAATTCAGTGGAGAAAAGAGGCTGAGTAGCTTGGTTTACGCGGGAGACCAATAAAACTTCAAGACAAGAAGTTTGCACCACTTACCTAGGCCGCAGGCGTCCTTCCGTTCTCCCGAAGGAGAGGAGACACTGAGGCCTCCCCGGTCGGATCTTAGAAGCCCAGGCATAATTAGTAAGCATGGTGGGTTCCGCGCTCCAGATGGAGACTCAGCCAGAGTGAGAGAGAGAGCGACATGGGGAGACCAGTATTTCGAGAAA…	C	intergenic	gene-FAM19A5(dist=127938),gene-LOC531175(dist=532149)
6	1271943	1273037	GTGCCGGAGACCAGCCCCGGCTGATCCAGGGAATTCGAAGCGGGGACGGCGTCGGCGAAGATCAGGAAACAATTGCTTAATTAAATGTTAATTAAGGATATAAAGAGTAATAGAATAAGGATAGCTCAGTAGGAAAATTCAGTGGAGAAAAGAGGCTGAAATAAGGATAGCTCAGTGAGGAAATTCAGTGTAGAAAAGAGGCTGAATAATTCAGCCAGAAGGTAAGAGAAAGAACGACATGGTGAGACCAAGTTTCGGTGAACAAGGCCCGCACTTTATTTTCCAAAGTAGTTTTTATACCTTAAGTTATGCATAGAGGATAATGGGGGAAGGGGTAGAGTCATGCAGTAAGCCAGGCTTTCTTCCTGCAAACTTATCATATGCAAAAGTTTAGGTGAT…	G	intergenic	gene-APELA(dist=1124951),gene-MARCH1(dist=697063)
6	3997987	3999285	TGCAGATGACTGCCGGGAGCCGGTGAGGCATTCCACTCATGACAAAGGTCATGAGGAAGGAGGCTCAGCATACCCAAAGGCGGGATCGAGCCTCAGGAGTCCGCCCGGATATTCTCGAGTATCTTCCCCCAAAAAACCAGAGTCTGCCTACTTTATTGCTTTGTGCTCTCACCTCTGACTTTACTGGGGGCTGTCCCCTACCACCATCTCTCTCTCTCTGTCAAAGAGTTAACTTACAGCTCCAATTAATAAAGTTCCTGGGCAATTAGGAGTGTTTAAATCTAAACCCCTCAGATGGCTCTCTAACTCACCTGAAAAGTTTACCCGGACTCCTGCAGCTATGCATACGATTGTTTACAGTCTCCCAGCCTCCAGAGGCACGGGAAGCTTAAGATATTC…	T	intergenic	gene-ANXA5(dist=407465),gene-QRFPR(dist=138786)
6	5464051	5465318	GGCCATCTGCCGGGAGCCGGCATATTGCATATTGAGTGCATATTGCATATTGAGTGCAGCACTTTTCAGGATCTGGAATAGCTCAACTGGAATTCTATCACTGCCGGTAGCCAGCGTGAGGAACTCCGCCCATGACAAAGGTCATGAGGAAGGAGGCTCGGCATACGCAAAGGCGGGATCAAGCCTCAGGAGTCTCCCTGGAAATTCTCGAGCAATCTACCCCCAAAACCAGAGTCTGCCTACTTTCTGCTTTGTGCTTTCACCTACACCTCTGACTTTACGGGGGGCTGTCCCCCACTACCTCTCTGAAAAAAGTTAGCTTACAGCTCCAGTTAATAATTCCTGGGTGTGACAGTGTTTAACCTACAAACTCCTTTGGAAATCCTCTAGCCTGCCTGA…	G	intergenic	gene-PRDM5(dist=682062),gene-TRNAG-CCC-41(dist=250438)
6	9113606	9113608	GTT	GGGTATTTGAAGGAGAGACGGCATAGGCGAGGATCAGGATACGATAGCTTCAATTAGGTATTAATTAAAGATATAAAGAGTAATAGAATAAGGATAGCTCAGTAGGAAAATTCAGTGGAGAAAAGAGGCTGAGTAGCTTGGTTTACGCGGGAGACCAATAAAACTTCAAGACAAGAAGTTTGCACCACTTACGTAGGCCGCAGGCGTCCTTCCGTTCTCCCGAAGGAGAGGAGACACTGAGGCCTCCCCGGTCGGATCTTAGAAGCCCAGGCATAATTAGTAAGCATGGTGGGTTCCGCGCTCCAGATGGAGACTCAACCAGAGTGAGAGAGAGAGCGACATGGGGAGACCAGTATTTCGAGAAACTGATCCCAATTCTTTATTTTCCAGAGTCTGTTT…	intergenic	gene-TRAM1L1(dist=836902),gene-NDST4(dist=1407555)
6	9566606	9567661	CCACATCTGCTGGGAGCAAGCTCCGCCCCTGGCAAAGGTCATGAGGAAGGAGGCTTGGCATACACAAAGGCGGGATCAAGCCTCAGGAGTCTCCCTGGAAATTCTCGAGCAATCTACCCCCAAAACCAGAGTCTGCCTACTTTCTGCTTTGTGCTTTCACCTACACCTCTGACTTTACGGGGGGCTGTCCCCCACTACCTCTCTCTGAAAAAAGAGTTAGCTTACAGCTCCAGTTAATAATTCTTGGGTGTGTCAGTGTTTCAACCTACAAACTCCTTTGGAAATCCTCTAGCCTGCCTGAATAGGTTTTTCCGGCCACGTGTGACTGTTCAGAGCCTCCCAACTGTGAGAGGCAGGAGATGTTCTAAACTGTCTAAATACAGATTCCTTTGAGCAGTT…	C	intergenic	gene-TRAM1L1(dist=1289902),gene-NDST4(dist=953502)
6	11231475	11232774	GCTGGATTGCCGGGGACCAGCCCCGGCTGATCCAGGGTATTCGAAGGAGAGACGGCGTAGGCGAAGATCAGGATGCGATAGCTTCAATTAGATTAATTAAAGATATAAAGAGTAATAGAATAAGGATAGCTCAGTAGGAAAATTCAGTGGAGAAAAGAGGCTGAGTAGCTTGGTTTACGCGGGAGACCAATAAAACTTCAAGACAAGAAGTTTGCACCACTTACGTAGGCCGCAGGCGTCCTTCCGTTCTCCCGAAGGAGAGGAGACACTGAGGCCTCCCTGGTCGGATCTTAGAAGCCCAGGCATAATTAGTAAGCATGGTGGGTTCCGCGCTCCAGATGGAGACTCAACCAGAGTGAGAGAGAGAGCGACATGGGGAGACCAGTATTTCGAGAAACT…	G	intergenic	gene-UGT8(dist=193853),gene-TRNAK-UUU-12(dist=268978)
6	18958431	18958431	A	AGGCTTGATCCCGCCTTTGCGTATGCCAAGCCTCCTTCCTCATTGATAAGTTTGCAGGAAGAAAGCCTGGCTTGCTGCCTGACTCTCCCGGC	intronic	gene-TBCK
6	21688844	21690043	AACTGAACTGCCGGGGACCAGCCCCGGCTGATCCAGGGTATTCGAAGCGGGGACGGCGTCGGCGAGGATCAGGAAACAACTGCTTAATTAAACGTTAATTAAGGATATAAAGAGTAATAGAATGAGGATAGCTCAGTGAAGAAATTCAGTGAAGAAAAGAGGCTGAAATAAGGATAGCTCAGTGAGGAAATTCAGTGGAGAAAAGAGGCTGAATAATTCAGCCAGAAGGTAAGAGAAAGAACGACATGGTGAGACCAAGTTTCGGTGAACAAGGCCCGCACTTTATTTTCCAAAGTAGTTTTTATACCTTAAGTTATGCATAGAGGATAATGGGGGAAGGGGTAGAGTCCTGCAGTAAGCCAGGCTTTCTTCCTGCAAACTTATCATATGCAAAAGTTT…	A	intronic	gene-CENPE
6	21689351	21689412	GAGCAAAGGTGTGGTGGGCTATAACAAGAAAAAGAATTAACTCAAGGGTCCCAGGTTACAAA	G	intronic	gene-CENPE
6	24470721	24471299	AGATGTTGGGGGCCAGAGTGAGGTACTCCGCCCGTGACAAAGGTCATGAGGAAGGAGGCTCGACATACGCAAAGGCGGGATCGAGCCTCAGGAGTCCCCCTGGAACTCCTCGAGCATCTACCCCCATAACCAGAGCCTGCCTACTTTACTACTTTGTGCTCACCTACACCTCTGACTTTACGGGGGGCTGTCCCCCACCACCTCTTTTGGAGAAGGAGTTAATTTAGAGCTCCAGTTTATAATAATTCCTGGGCGTGATAAGAGTGTTTTAACCTACAAACTCCTCTGAAGGTTCTCTAGCCTGCCTGACAGGCTCGTCCGGCCACATGTGATTGCTCACAGCCTCCCAACCGTGAGAGGCACAAGATGCTTTAAACCCTCTAAAAACGGGTTCTTTAG…	AA	intergenic	gene-EMCN(dist=138166),gene-DDIT4L(dist=55142)
6	24470721	24477032	AGATGTTGGGGGCCAGAGTGAGGTACTCCGCCCGTGACAAAGGTCATGAGGAAGGAGGCTCGACATACGCAAAGGCGGGATCGAGCCTCAGGAGTCCCCCTGGAACTCCTCGAGCATCTACCCCCATAACCAGAGCCTGCCTACTTTACTACTTTGTGCTCACCTACACCTCTGACTTTACGGGGGGCTGTCCCCCACCACCTCTTTTGGAGAAGGAGTTAATTTAGAGCTCCAGTTTATAATAATTCCTGGGCGTGATAAGAGTGTTTTAACCTACAAACTCCTCTGAAGGTTCTCTAGCCTGCCTGACAGGCTCGTCCGGCCACATGTGATTGCTCACAGCCTCCCAACCGTGAGAGGCACAAGATGCTTTAAACCCTCTAAAAACGGGTTCTTTAG…	AA	intergenic	gene-EMCN(dist=138166),gene-DDIT4L(dist=49409)
6	24470721	24479509	AGATGTTGGGGGCCAGAGTGAGGTACTCCGCCCGTGACAAAGGTCATGAGGAAGGAGGCTCGACATACGCAAAGGCGGGATCGAGCCTCAGGAGTCCCCCTGGAACTCCTCGAGCATCTACCCCCATAACCAGAGCCTGCCTACTTTACTACTTTGTGCTCACCTACACCTCTGACTTTACGGGGGGCTGTCCCCCACCACCTCTTTTGGAGAAGGAGTTAATTTAGAGCTCCAGTTTATAATAATTCCTGGGCGTGATAAGAGTGTTTTAACCTACAAACTCCTCTGAAGGTTCTCTAGCCTGCCTGACAGGCTCGTCCGGCCACATGTGATTGCTCACAGCCTCCCAACCGTGAGAGGCACAAGATGCTTTAAACCCTCTAAAAACGGGTTCTTTAG…	A	intergenic	gene-EMCN(dist=138166),gene-DDIT4L(dist=46932)
6	27559422	27560298	AGTGGTACAAGCCTCTTGTCTTGAAGTTTTATTGGTTTCCCGTGTAAACCGAGCTACTCAGCCTCTTTTCTCCACTGAATTTTCCTGCTGAGCTATCCTCATTCTATTACTCTTTATATCTCTAATTAATATCTAATTAAAGCCAGTGTATTCACCGATGCCGTCTCTCCTTTGAATTTCCCTGGATCCACTGGGGCTGGACCCCGGCAAGAAGGTAAAGAAACAACAGAAGCAGACTCTCTTGAGAGAACTTAGATGCTTAGCATAATACAGAACTTGACGCTTAGCATTAATACAGAAAAACAAGGAAGCTTCATGGCTGTGATGATTAATCTTATGTGTCTATTTGGTGTGATCACGGTGACCAGTTGTTTGGTCAAAACACTAACCTAGATTTTT…	A	intergenic	gene-TRNAC-GCA-81(dist=520741),gene-LOC530285(dist=369106)
6	28557405	28557406	CT	CCCCACGTTGGGCGCCACCTGCCGGGGACCAGCCCCAGCTGATCCAGGGTACTCGAAGGAGAGACGGCGTCGGCGAGGGTCAGGATACGATAGTTTCAATTAGATATTAATTAGAGATATAAAGAGTAATAGAATAAGGATAGCTCAGTAGGAAAATTCAGTGGAGAAAAGAGGCTGAGTAGCTTGGTTTACGCGGGAGACCAATAAAACTTCAAGACAAGAAGTTTGCACCACTTACGTAGGCCGCAGGCGTCCTTCCGTTCTCCCGAAGGAGAGGAGACACTGAGGCCTCCCCGGTCGGATCTTAGAAGCCCAGGCATAATTAGTAAGCATGGTGGGTTCCGCGCTCCAGATGGAGACTCAACCAGAGTGAGAGAGAGAGCGACATGGGGAGACCAG…	intergenic	gene-LOC530285(dist=627261),gene-PDHA2(dist=82572)
6	32068005	32068005	A	AGAACAAATCTAGTGGAGGTGATGGAATTCCAGTTGAGCTATTTCAAATCCTGAAAGATGACACTGTGAAAGTGCTGCACTCAATATGCAGGCAAATTGGGAAAATTCAGCAGTGGCCACAG	intronic	gene-GRID2
6	32240831	32240831	T	TAGACCTTGCTGGGGACCAGCCCCAGCTGATCCAGGGTATTCGAAGGAGAGACGGCCTAGGCGACTATTTATATGCTAATTAGAGATATAGAGAACAATAGAATGAGGATAGCTCAGTAGGAAAATTCAGTGGAGAAAAGAAGCTGAGTAGCTTGGTTTACGCGGGAGACCAATAAAACTTCAAGACAAGAAGTTTGCACCACTGACGTAGGCCGCAGGCGCCCTCTCGAATAGCGGAAGGTGTCTCACCCTAGACACCTTCTCGAGTGGGTCTTAGAAGCCCAGGCATGATTAGTCAGCGTGGTGGGTTCCGCGCTCCAGATGGAGACTCAGCTGGAAGTTAAAGGGAAGAATGACATGGGGAGACCAAGCGTTGGTGAGCAAGGCCCGTAGCTTTAT…	intronic	gene-GRID2
6	32772141	32772411	TCAGGTGCTTCATACAAATGTATACAGAGGTCTTAGGGGTGTTACATCATCTTCTGGCCAGGGGGGCCTGCTGACAATTTACGACCCTCTCCTTGTGACAGCGGTCAGTCAATCAGGACACTTATTTCTCCAGGGCTGATTATTCTCAAAACAGACGCCACCCAAATAAAGTTACATTCCTACAGGGTGAGGGTGTAGTGGGTTTTAGTTAAGGAAAGAATTTACTTAGCCTAAGGTCTAATGTGATTAATATCAAAGGTTAATTCTATAT	TTC	intergenic	gene-GRID2(dist=393036),gene-CCSER1(dist=240503)
6	32772474	32772538	ATGAAAAACCCTTCACCAACACAATTTCTAATTAGCCCACTATACTTATACTTATAGTTTTCTAA	AC	intergenic	gene-GRID2(dist=393369),gene-CCSER1(dist=240376)
6	32772576	32772792	TCTCGTGCCTCTCACGGTTGGGAGGCTGTGAGCAATCACATGTGGCCGGACAAGCCTGTCAGGCAGGCTAGAGAACCTTCAGAGGAGTTTGTAGGTTAAAACGCTCTTGTCACACCCAAGAGTTTTTATTGACTGGAGCTCTAGGTTAACTCCTTCTCCGAAAGAGGTGGTGGGGGACAGCCCCCCGTAAAGTCAGAGGTGTAGGTAAGAGCACAAA	TT	intergenic	gene-GRID2(dist=393471),gene-CCSER1(dist=240122)
6	33746125	33746125	C	CCTCACATGCGGGGAGCCGGTGAGGCATTCCACTCGTGACAAAGGTCATGAGGAAGGAGGCTCGGCATACGCAAAGGCGGGATCGAGCCTCAGGAGTCCCCCCGGATATTCTCGAGCATTTTCCCCCCAAAAAACCAGAGTCTGCCTACTTTATTGCTTTGTGCTCTCACCTCTGACTTTACTGGGGGCTGTCCCCTACCACCATCTCTCTCTGTCAAAGAGTTAACTTACAGCTCCAATTAATAAAGTTCCTGGGCAATTAGGAGTGTTTAAATCCAAACCCCTCTGATGGCTCTCTAACTCGCCTGACAAGTTTACCCGGACTCCTGCAGCTATGCATACGGTTGTTTACAGTCTCCTAGCCTCCAGAGGCACGGGAAGCTTAAGATATTCAAATAG…	intronic	gene-CCSER1
6	34033353	34034451	TGTTCAATGCGGGGAGTGAGCTCCGCCTCTGGCAAAGGTCATGAGGAAGGAGGCTTGGCACACGCAAAGGCGGGATCAAGCCTCAGGAGTCTCCCTGGAAATTCTCGAGCAATCTACCCCCAAAACCAGAGTCTGCCTACTTTCTGCTTTGTGCTTTCACCTACACCTCTGACTTTACGGGGGGCTGTCCCCCACGACCTCTCTGAAAAAAGAGTTAGCTTACAGCTCCAGTTAATAATTCCTGGGTGTGACAGTGTTTAACCTACAAACTCCTTTGGAAATCCTCTAGCCTGCCTGAATAGGTTTTTCCGGCCACATGTGATTGTTCAGAGCCTCCCAACTGTGAGAGGCAGGAGATGTTCTAAACTGTCTAAACACAGATTCTTTTGAGTAGTTAAA…	T	intronic	gene-CCSER1
6	34646017	34647310	CATCCAGTGCCGAGGACCAGCCCCGGCTGATCCAGGGTATTCGAAGGGGAGACGGCGTCGGCGACTATTTATATGCTAATTAGAGATATAGAGAACAATAGAATGAGGATAGCTCAGTAGGAAATTTCAGTGGAGAAAAGAAGCTGAGTAGCTTGGTTTACGCGGGAGACCAATAAAACTTCAAGACAAGAAGTTTGCACCACTTACGTAGGCCGCAGGCGCCCTCTCGAATAGCGGAAGGTGTCTCACCCTAGACACCTTCTCGAGTGGGTCTTAGAAGCCCAGGCATGATTAGTAAGCGTGGTGGGTTCCACGCTCCAGATGGAGACTCAGCTGGAAGTTAAAAGAATGACATGGGGAGACCAAGCGTTGGTGAGCAAGGCCCGTAGCTTTATTTTT…	C	intergenic	gene-CCSER1(dist=144761),gene-MMRN1(dist=7787)
6	37801259	37801259	A	AGAACTGTGTTGGGGGCCAGAGTGAGGTACTCCGCCCATGGCAAAGGTCATGAGGAAGGAGGCTCGACATACGCAAAGGCAGGATCGAGCCTCAGGAGTCCCCCTGGAAATCCTCGAGCGTCTACCCCCATAACCAGAGCCTGCCTACTTTACTACTTTGTGCTCTTACCTACACCTCTGACTTTACGGGGGGCTGTCCCCCACCACCTCTTTCAGAGAAGGAGTTAACCTAGAGCTCCAGTCAATAAAAACTCTTGGGTGTGACAAGAGTGTTTTCACCTACAAACTCCTCTGAAGGTTCTCTAGCCTGCCTGACAGGCTCGTCCGGCCACATGTGATTGCTCACAGCCTCCCAACCGTGAGAGGCACAAGATGCTTTAAACCCTCTAAAAACAGGTT…	intergenic	gene-LCORL(dist=244114),gene-SLIT2(dist=1978016)
6	54458436	54459732	TATTAAGTTGCTGGGGACCAGCCCCAGCTGATCCAGGGTATTCGAAGGAGAGACGGCCTAGGCGACTATTTATATGCTAATTAGAGATATAGAGAACAATAGAATGAGGATAGCTCAGTAGGAAAATTCAGTGGAGAAAAGAAGCTGAGTAGCTTGGTTTACGCGGGAGACCAATAAAACTTCAAGACAAGAAGTTTGCACCACTTACGTAGGCCGCAGGCGCCCTCTCGAATAGCGGAAGGTGCCTCACCCTAGACACCTTCTCGAGTGGGTCTTAGAAGCCCAGGCATAATTAGTAAGCGTGGTGGGTTCCGCGCTCCAGATGGAGACTCAGCTGGAAGTTAAAGGGAAGAATGACATGGGGAGACCAAGCGTTGGTGAACAAGGCCCGTAGCTTTA…	T	intergenic	gene-TRNAC-GCA-82(dist=1785189),gene-ARAP2(dist=983682)
6	54901785	54901785	G	GCGAAGCGGGGACGGCGTCGGCGACCTATTTATTTATTTAAATATTTTATCAAAGATATAAAGAGTAATAGGATGAGGATAGCTCAGTAGGAAAATTCAGTGGAGAAAAGAGGCTGAGTGGCTTGGTTTACGCGGGAGACCAATAAAACTTCAAGACAAGAAGTTTGCACCACTTACGTAGGCCGCAGGCGTCTTTCCGTTTTCCCAAAGGAGAGGAGACACTGAGGCCTCCCCGGTCGGATCTTAGAAGCCCAGGCATAATTAGTAAGCATGGTGGGTTCCGCGCTCTAGATGGAGACTCAACCAGAGTGAGAGAGAGAGCGACCTGGGGAGACCAGTATTTCAAGAAACTGATCCCAATTCTTTATTTTCCATGGTCTACTTTTATACACTGAGATG…	intergenic	NONE(dist=NONE),gene-ARAP2(dist=541629)
6	58315671	58316848	GGTTACTTGCCGGGGTCCAGCCCCGGTGGATCCAGGGAATTTGAAGCGGGGACGGCGTCGGCGAGGATCAGGAAACAACTGCTTAATTAAACTTTTTAATTAAGGATATAAAGAGTAATAGAATAAGGATAGCTCAGTGAGGAAATTCAGTGGAGAAAAGAGGCTGAATAATTCAGCCAGAAGGTAAGAGAAAGAACTACATGGGGAGACCAAGTTTCGGTGAACAAGGCCCGCACTTTATTTTCCAAAGTAGTTTTTATACCTTAAGTTATGCATAGAGGATAATGGGGGAAGGGGTAGAGTCATGCAGTAAGCCAGGCTTTCTTCCTGCAAACTTATCATATGCAAAAGTTTAGGTGATTTGCATCATCTTCTGGCCCGGAGGCCTGTTAACATTTT…	G	intronic	gene-KLHL5
6	63135965	63145060	TGATTCTTGTTGGGGGCCAGAGTGAGGTACTCCGCCCATGGCAAAGGTCATGAGGAAGGAGGCTCGACATACGCAAAGGCGGGATCGAGCCTCAGGAGTCCCCCTGGAAATCCTCGAGCGTCTACCCCCATAACCAGAGCCTGCCTACTTTACTACTTTGTGCTCTTACCTACACCTCTGACTTTACGGGGGGCTGTCCCCCACCACCTCTTTCGGAGAAGGAGTTAACCTAGAGCTCCAGTTTATAATAATTCCTGGGCGTGATAAGAGTGTTTTAACCTACAAACTCCTCTGAAGGTTCTCTAGCCTGCCTGACAGGCTCGTCCGGCCACATGTGATTGCTCACAGCCTCCCAACCGTGAGAGGCACGAGATGCTTTAAACCCTCTAAAAACAGGTT…	T	intergenic	gene-KCTD8(dist=38366),gene-YIPF7(dist=93797)
6	65192192	65192192	T	TGACTCTTGCGGGGAGCCGGTGAGGCATTCCACTCGTGACAAAGGTCATGAGGAAGGAGGCTCGGCATACGCAAAGGCGGGATCGAGCCTCAGGAGTCCCCCCGGATATTCTCGAGCATTTTCCCCCCAAAAAAACCAGAGTCTGCCTACTTTATTGCTTTGTGCTCTCACCTCTGACTTTACTGGGGGCTGTCCCCTACCACCGTCTCTCTCTCTCTGTGTCAAAGAGTTAACTTACAGCTCCAATTAATAAAGTTCCTGGGCAATTAGGAGTGTTTAAATCCAAACCCCTCTGATGGCTCTCTAACTCGCCTGACAAGTTTACCCGGACTCCTGCAGCTATGCATACGATTGTTTACAGTCTCCCAGCCTCGAGAGGCATGGGAAGCTTAAGATATT…	intergenic	gene-TRNAW-CCA-15(dist=195119),gene-COX7B2(dist=142040)
6	70111965	70120129	CCCAGAGTGCCGGGGTCCTGCCCCGGCTGATCCAGGGTATTCGAAGCGGGGACGGCGTCGGCGACCTATTTATTTAAATATTTTATCAAAGATATAAAGAGTAATAGAATAAGGATAGCTCAGTAGGAAAATTCAGTGGAGAAAAGAGGCTGAGTAGCTTGGTTTACGCGGGAGACCAATAAAACTTCAAGACAAGAAGTTTGCACCACTTACGTAGGCCGCAGGCGTCCTTCCGTTCTCCCGAAGGAGAGGAGACACTGAGGCCTCCCCGGTCGGATCTTAGAAGCCCAGGCATAATTAGTAAGCATGGTGGGTTCCGCGCTCCAGATGGAGACTCAACCAGAGTGAGAGAGAGAGCGACATGGGGAGACCAGTATTTTGAGAAACTGATCCCAATTC…	C	intergenic	gene-PDGFRA(dist=340416),gene-KIT(dist=46552)
6	71019815	71019815	T	TATACACTGTTGGGGGCCAGAGTGAGGTACTCCGCCCGTGACAAAGGTCATGAGGAAGGAGGCTCGACATACGCAAAGGCGGGATCGAGCCTCAGGAGTCCCCCTGGAACTCCTCGAGCATCTACCCCCATAACCAGAGCCTGCCTACTTTACTACTTTGTGCTCACCTACACCTCTGACTTTACGGGGGGCTGTCCCCCACCACCTCTTTTGGAGAAGGAGTTAACTTAGAGCTCCAGTTTATAATAATTCCTGGGCGTGATAAGAGTGTTTTAACCTACAAACTCCTCTGAAGGTTCTCTAGCCTGCCTGACAGGCTCGTCCGGCCACATGTGATTGCTCACAGCCTCCCAACCGTGAGAGGCACAAGATGCTTTAAACCCTCTAAAAACGGGTTCT…	intronic	gene-PDCL2
6	75528590	75528677	GAAGCCCAGGCATAATTAGTAAGCATGGCGGGTTCCGCGCTCCAGATAGAGACTCAACCAGAGTGAGAGAGAGAGCAACATGGGGAGA	GTG	intergenic	gene-TRNAG-UCC-13(dist=1987692),gene-TRNAC-GCA-86(dist=838860)
6	78511928	78513220	GAAAGTATGCCGGGGACCAGCCCCGGCTGATCCAGGGTATTCGAAGGAGAGACGGCATAGGCGAGGATCAGGATACAATAGCTTCAATTAGATATTAATTAAAGATATAAAGAGTAATAGAATAAGGATAGCTCAGTAGGAAAATTCAGTGGAGAAAAGAGGCTGAGTAGCTTGGTTTACGCGGGAGACCAATAAAACTTCAAGACAAGAAGTTTGCACCACTTACGTAGGCCGCAGGCGTCCTTCCGTTCTCCCGAAGGAGAGGAGACACTGAGGCCTCCCCGGTCGGATCTTAGAAGCCCAGGCATAATTTGTAAGCATGGTGGGTTCCGCGCTCCAGATGGAGACTCAGCCAGAGTGGGAGAGAGAGCGACATGGGGAGACCAGTATTTCGAGAAA…	G	intergenic	gene-ADGRL3(dist=853158),gene-TRNAC-GCA-87(dist=225276)
6	79653731	79654955	TCCCTGCTGCCGGGGACCAGCCCCGGCTGATCCAGGGTATTCGAAGGAGAGACGGCGTAGGCGAAGATCAGGAAACAATTGCTTAATTAAATGTTAATTAAGGATATAAAGAGTAATAGAATGAGGATAGCTCAGTAAAATTCAGTGAAGAAAAGAGGCTGAAATAAGGATAGCTCAGTGAGGAAATTTAGTGGAGAAAAGAGGCTGAATAATTCAGCCAGAAGGTAAGAGAAAGAACGACATGGTGAGACCAAGTTTCGGTGAACAAGGCCCGCACTTTATTTTTCAAAGTAGTTTTTATACCTTAAGTTATGCACAGAGGATAATGGGGGAAGGGGTAGAGTCTTGCAGCAAACCCGGCTTTCTTCCTGCAAACTTATCATATGCAAAAGCTTAGGT…	T	intergenic	gene-LOC112447087(dist=470769),gene-TECRL(dist=132766)
6	79796742	79798034	GGAAGGGTGTTGGGGGCCAGAGTGAGGTACTCCGCCCATGACAAAGGTCATGAGGAAGGAGGCTCGACATATGCAAAGGCGGGATCGAACCTCAGGAGTCCCCCTGGAACTCCTCGAGCGTCTACCCCCATAACCAGAGCCTGCCTACTTTACTACTTTGTGCTCTTACCTACACCTCTGACTTTACGGGGGGCTGTCCCCCACCACCTCTTTCAGAGAAGGAGTTAACCTAGAGCTCCAGTCAATAAAAACTCTTGGGTGTGACAAGAGTGATTTAACCTACAAACTCCTCTGAAGGTTCTCTAGCCTGCCTGACAGGCTCGTCGGGACACATGTGATTGCTCACAGCCTCCCAACCAATCTTGAGAGGCACAAGATGCTTTAAACCCTCTAAAAACA…	G	intronic	gene-TECRL
6	82959978	82961257	TCAGAAGTGCCGGGGTCCTGCCCCGGCTGATCCAGGGTATTCGAAGCGGGGACGGCGTCGGCGACCTATTTATTTAAATGTTTTATCAAAGATATAAAGAGTAATAGGATGAGGATAGCTCAGTAGGAAAATTCAGTGGAGAAAAGAGGCTGAGTAGCTTGGTTTACTCGGGAGACCAATAAAACTTCAAGACAAGAAGTTTGCACCACTTATGTAGGCCGCAGGCGTCCTTCCGTTCTCCCGAAGGAGAGGAGACACTGAGGCCTCCCCGGTCGGATCTTAGAAGCCCAGGCATAATTAGTAAGTATGGTGGGTTCCGCGCTCCAGATGGAGACTCAGCCAGAGTGGGAGAGAGAGCGACATGGGGAGACCAGTATTTCGAGAAACTGATCCCAATTC…	T	intergenic	gene-EPHA5(dist=1717735),gene-CENPC(dist=222155)
6	84007030	84007030	T	TAACAGATGCGGGGAGCCGGTGAGGCATTCCACTCGTGACAAAGGTCATGAGGAAGGAGGCTCGGCATAGGCAAAGGCGGGATCGAGCCTCAGGAGTCCCCCCGGATATTCTCGAGCATTTTCCCCCAAAAAAACCAGAGTCTGCCTACTTTATTGCTTTGTGCTCTCACCTCTGACTTTACTGGGGGCTGTCCCCTACCACCATCTCTCTCTCTCTGTGTCAAAGAGTTAACTTACAGCTCCAATTAATAAAGTTCCTGGGCAATTAGGAGTGTTTAAATCCAAACCCCTCTGATGGCTCTCTAACTCGCCTGACAAGTTTACCCGGACTCCTGCAGCTATGCATACGATTGTTTACAGTCTCCTAGCCTCCAGAGGCACGGGAAGCTTAAGATATTC…	intronic	gene-TMPRSS11E
6	84519541	84519545	TTTAT	TGCCAGGGTCCAGCCCCGGTGGATCCAGGGAATTCGAAGCGGGGACGGTGTCGGCGAGGATCAGGAAACAATTGCTTAATTAAACGTTAATTAAGGATATAAAGAGTAATAGAATGAGGATAGCTCAGTGAGGAAATTCAGTGGAGAAAAGAGGCTGAATAATTCAGCCAGAAGGTAAGAGAAAGAACGACATGGTGAGACCAAGTTTCGGTGAACAAGGCCCGCACTTTATTTTCCAAAGTAGTTTTTATACCTTAAGTTATGCATAGAGGATAATGGGGGAAGGGGTAGAGTCAGGCAGCAAGCCAGGCTTTCTTCCTGCAAACTTATCATATGCAAAAGCTTAGGTGATTTGCATCATCTTCTGGCCCGGAGGCCTGTTAACATTTTAAGACCTTT…	intergenic	gene-LOC100296421(dist=6443),gene-LOC540544(dist=88502)
6	85078421	85078423	CCA	CTGCCGGGAGCCGGCATATTGCATATTGAGTGCATATTGCATATTGAGTGCAGCACTTTTCAGGATCTGGAATAGCTCAACTGGAATTCTATCACTGCCGGTAGCCAGCATGAGGAACTCCGCCCATGACAAAGGTCATGAGGAAGGAGGCTCGGCATACGCAAAGGCGGGATCGAGCTTCAGGAGTCCCCCTGGAAATTCTCGAGCATATACCCCCAAAACCAGAATCTGCCTACTTTCTGCTTTGTGCTTTCACCTACACCTCTGACTTTACGGGGGCTGTCCCCCACTACCTCTCTGAAAAAAGTTAGCTTACAGCTCCAGTTAATAATTCCTGGGTGTGACAGTGTTTAACCTACAAACTCCTTTGGAAATCCTCTAGCCTGCCTGAATAGGTTT…	intergenic	gene-LOC782370(dist=15243),gene-UGT2A1(dist=4956)
6	85097372	85097372	G	GTGAGCTATTTCAAATCCTAAAAGATGATACTGTGAAAGTGCTGCACTCAATAGGCCAGCAAATATGGAAACTCAGCAGTGGCCACAGGAACAGAGCTAGTAGAGATGATGGAATTTCAA	intronic	gene-UGT2A1
6	85266136	85267259	CCTTTATTGCGGGGAGCGAGCTCCGCCTCTGGCAAAGGTCATGAGGAAGGAGGCTTGGCATACGCAAAGGCGGGATCAAGCCTCAGGAGTCTCCCTGGAAATTCTCGAGCAATCTACCCCCAAAACCAGAGTCTGCCTACTTTCTGCTTTGTGCTTTCACCTACACCTCTGACTTTACCGGGGGGCTGTCCCCCACTACCTCTTTGAAAAAAGTTAGCTTACAGCTCCAGTTAATAATTCCTGGGTGTGACAGTGTTTAACCTACAAACTCCTTTGGAAATCCTCTAGCCTGCCTGAATAGGTTTTTCCGGCCTCATGTGATTGTTCAGAGCCTCCCAACTGTGAGAGGCAGGAGATGTTCTAAACTGTCTAAACACAGATTCTTTTGAGTAGTTAAAA…	C	intronic	gene-SULT1D1
6	88949316	88950585	TCTGTTCTGCCGGGGACCAGCCCCGGCTGATCCAGGGTATTCGAAGGAGAGACGGCGTAGGCGAAGATCAGGAAACAATTGCTTAATTAAATGTTAATTAAGGATATAAAGAGTAATAGAATGAGGATAGCTCAGTAAAATTCAGTGAAGAAAAGAGGCTGAAATAAGGATAGCTCAGTGAGGAAATTCAGTGGAGAAAAGAGGCTGAAATAAGGATAGCTCAGTGAGGAAATTTAGTGCAGAAAAGAGGCTGAATAATTCAGCCAGAAGGTAAGAGAAAGAACGACATGGTGAGACCAAGTTTCGGTGAACAAGGCCCGCACTTTATTTTTCAAAGTAGTTTTTATACCTTAAGTTATGCACAGAGGATAATGGGGGAAGGGGTAGAGTCTTGCAGCA…	T	downstream	gene-CXCL2
6	90727876	90727876	T	TCTGATCTGCCGGGAGCCGGCATATTGCATATTGAGTGCATATTGCATATTGAGTGCAGCACTTTTCAGGATCTGGAATAGCTCAACTGGAAATTCTATCACTGCCGGTAGCCAGCGTGAGGAACTCCGCCCATGACAAAGGTCATGAGGAAGGAGGCTCGGCATACGCAAAGGCGGGATCGAGCTTCAGGAGTCCCCCTGGAAATTCTCGAGCATATACCCCCAAAACCAGAATCTGCCTACTTTCTGCTTTGTGCTTTCACCTACACCTCTGACTTTACGGGGGGCTGTCCCCCACTACCTCTCTGAAAAAAGTTAGCTTACAGCTCCAGTTAATAATTCCTGGGTGTGACAGTGTTTAACCTACAAACTCCTTTGGAAATCCTCTAGCCTGCCTGA…	intronic	gene-PPEF2
6	90804709	90805732	AATTCAAGATCGGGCTTGTTTATAGTAGAATCTCTTTTGATACGTTTCGTGCCATATACGAGGGAGGGTCTCATCTAGACATATCTGAAGCCCAGGCAAATAAGTGGTCGCAGAGGATATCCACTTTCCAGATGGAGACTTCAGCCGGAAGTTAAAGGAAAGAATGACATGGGGAGACCAAGCATTGGTGAGCAAGGCCCATAGCTTTATTTTTAACAGGGGCTTTTATACCCTAAGTTACACATAGAGGATAATAGGGGATGCAAAGTCAGCAGTTTTTGATCCTTATCAAAAACCAGGGTTTCTTTCCTGCAAACTTATCGTATACAAATGGTTTAGGTGATTTACATCATCTTCTGGCCAGAAGGCCTACTAACATTTTATGACTCTTGACAAGGA…	AT	intergenic	gene-NAAA(dist=10254),gene-SDAD1(dist=3979)
6	90805732	90805732	C	CCTGAAGCTCGATCCCGCCTTTGCGCATGCTGAGCCTCCTTCCTCATGACCTTTGTCACGAGTGGAATGCCTCACCGGCTCCCGGCAGGTGGTATCAT	intergenic	gene-NAAA(dist=11277),gene-SDAD1(dist=3979)
6	91057087	91058005	GACTGGAGTGGGTAGCTGTTGGGGGCCAGAGTGAGGTACTCCGCCCATGGCAAAGGTCATGAGGAAGGAGGCTCGACATACGCAAAGGCGGGATCGAGCCTCAGGAGTCCCCCTGGAAATCCTCGAGCGTCTACCCCCATAACCAGAGCCTGCCTACTTTACTACTTTGTGCTCTTACCTACACCTCTGACTTTACGGGGGGCTGTCCCCCACCACCTCTTTCGGAGAAGGAGTTAACCTAGAGCTCCAGTCAATAAAAACTCTTGGGTGTGACAAGAGTGTTTTAACCTACAAACTCCTCTGAAGGTTCTCTAGCCTGCCTGACAGGCTCCTCTGGCCACATGTGATTGCTCACAGCCTCCCAACCGTGAGAGGCACAAGATGCTTTAAACCCTCTAA…	G	intronic	gene-SCARB2
6	91058013	91058384	GTCTCCCCATGTCGCTCTCTCTCACTCTGGCTGAGTCTCCATCTGGAGCGCGGAACCCACCATGCTTACTAATTATGCCTGGGCTTCTAAGATCTGACCGGGGAGGCCTCAGTGTCTCCTCTCCTTCGGGAGAACGGAAGGACGCCTGCGGCCTACGTAAGTGGTGCAAACTTCTTGTCTTGAAGTTTTATTGGTCTCCCGCGTAAACCAAGCTACTCAGCCTCTTTTCTCCACTGAATTTTCCTACTGAGCTATCCTTATTCTATTACTCTTTATATCTTTAATTAATATCTAATTGAAGCTATCGTATCCTGACCCTCGCCGACGCCGTCTCTCCTTCGAGTACCCTGGATCAGCCGGGGCTGGTCCTCG	GA	intronic	gene-SCARB2
6	106000000	105739524	TATCTTATTGTTGGGGGCCAGAGTGAGGTACTCCGCCCGTGACAAAGGTCATGAGGAAGGAGGCTCGACATATGCAAAGGCGGGATCGAGCCTCAGGAGTCCCCCTGGAAATCCTCGAGCGTCTACCCCCATAACCAGAGCCTGCCTACTTTACTACTTTACTACTTTGTGCTCTTACCTACATCTCTGACTTTACGGGGGGCTGTCCCCCACCACCTCTTTCGGAGAAGGAGTTAACCTAGAGCTCCAGTCAATAAAAACTCTTGGGTGTGACAAGAGTGTTTTAACCTACAAACTCCTCTGAAGGTTCTCTAGCCTGCCTGACAGGCTCGTCCGGCCACATGTGATTGCTCACAGCCTCCCAACCGTGAGAGGCACGAGATGCTTTAAACCCTCTAA…	T	intronic	gene-CLNK
6	106000000	106217845	GGGGCCATGTTGGGGGCCAGAGTGAGGTACTCTGCCCATGGCAAAGGTCATGAGGAAGGAGGCTTGACATACGCAAAGGCGGGATCGAGCCTCAGGAGTCCCCCTGGAAATCCTCGAGCGTCTACCCCCATAACCAGAGCCTGCCTACTTTACTACTTTGTGCTCTTACCTACACCTCTGACTTTACGGGGGAGCTGTCCCCCACGACCTCTTTCAGAGAAGGAGTTAACCTAGAGCTCCAGTTAATAATAATTCCTGGGCGTGATAAGAGTGTTTTAACCTACAAACTCCTCTGAAGGTTCTCTAGCCTGCCTGACAGGCTTGTCCGGCCACATGTGATTGCTCACAGCCTCCCAACCATGAGAGGCACGAGATGCTTTAAACCTTCTAAAAACAGGT…	G	intergenic	gene-TRNAA-UGC-7(dist=142438),gene-HS3ST1(dist=285751)
6	107000000	107012025	GCAAATATGCGGGTAGCGAGCTCCGCCTCTGGCAAAGGTCATGAGGAAGGAGGCTTGGCATACGCAAAGGCGGGATCAAGCCTCAGGAGTCTCCCTGGAAATTCTCGAGCAATCTACCCCCAAAACCAGAGTCTGCCTACTTTCTGCTTTGTGCTTTCACCTACACCTCTGACTTTACGGGGGGCTGTCCCCCACTACCTCTCTGAAAAAAGAGTTAGCTTATAGCTCCAGTTAATAATTCCTGGGTGTGACAGTGTTTCAACCTACAAACTCCCTTGGAAGTCCTCTAGCCTGCCTGAATAGGTTTTTCCGGCCACATGTGATTGCTCAGAGCCTCCAAACTGTGAGAGGCATGAGATGTTCTAAACTGTCTAAATACAGATTCCTTTGAGCAGTCAA…	G	intergenic	NONE(dist=NONE),gene-RAB28(dist=1587601)
6	107000000	107011228	GTTAGCTTATAGCTCCAGTTAATAATTCCTGGGTGTGACAGTGTTTCAACCTACAAACTCCCTTGGAAGTCCTCTAGCCTGCCTGAATAGGTTTTTCCGGCCACATGTGATT	GA	intergenic	NONE(dist=NONE),gene-RAB28(dist=1588398)
6	107000000	107011575	AACTTTATCTAATGCTTTTGGAGGGTGGCTCCTGACCAATCACCTTTAGAGAAAAATAAGTTTTCT	A	intergenic	NONE(dist=NONE),gene-RAB28(dist=1588051)
6	108000000	107732325	G	GCTGTTGGGGGCCAGAGTCGAGCCTCCTTCCTCATGACCTTTGCCATGGGCGGAGTACCTCACTCTGGCCCCCAACATCTCCCCCTTTTTTATTTCTTAAAACAACCAGATGCAGCTCAGTCGCGAGCTTCCGAATGCTCTGCCGAAGAATCCTGACAATACAAGGAAGAGTGATTATGAGAAGTAGAATTAGAGACTAGGGATATTAGACAGAATATTTTTTCCAGAAATAAAGTTAGAGAAGGTGTGAAAAAAGTCATTAGCTGCTCCAGTGGCGGTAAAATCCAGTCGAGAGTGTTCCAAGGTCTGTATTTGATTATGAAGTTTTCCTAAGTCCAGGCCAATATCAGAACTGTTCCAAACACCTGAGATATGATTTTTAATCTTTTCCCATTCATA…	intergenic	NONE(dist=NONE),gene-RAB28(dist=867301)
7	1793735	1794788	AACTCAGGTGCCAGGGACCAGCCCCGGCTGATCCAGGGAATTCGAAGCGGGGACGGCGTCGGCGAGGATCAGGAAACAATTGCTTAATTAAACGTTAATTAAGGATATAAAGAGTAATAGAATGAGGATAGCTCAGTGAGGAAATTCAGTGGAGAAAAGAGGCTGAACAATTCAGCCAGAAGGTAAGAGAAAGAACGACATGGTGAGACCAAGTTTTGGAGAACAAGGCCCACACTTTATTTTCCATAGTAGTTTTTATACCTTAAGTTATGCATAGAGGATAATGGGGAAGGGGTAGAGTCATGCAGTAAGCCAGGCTTTCTTCCTGCAAACTTATCATATGCAAAAGCTTAGGTGATTTGCATCATCTTCTGGCCCGGAGGCCTTTTTCTCTAAAGG…	A	intergenic	gene-RUFY1(dist=21122),gene-ADAMTS2(dist=220644)
7	1794291	1794415	CAATACACTGCCAGGGACACAGCAGGTAAGGGATATGGAGACTTAGCAGCAAACATTGGCCCAACAAGTGAAAATCCCTTCACCAATACAATTTCTAATCAATCTTTTAACTGCTCAAAGGAATC	CT	intergenic	gene-RUFY1(dist=21678),gene-ADAMTS2(dist=221017)
7	4075703	4077002	GGGGGTATGCTGGGGACACGCCCCAGCTGATCCAGGGTATTCGAAGGAGAGACGGCCTAGGCAACTATTTATATGCTAATTAGAGATATAAAGAATAATAGAATGAGGATAGCTCAGTAGGAAAATTCAGTGGAGAAAAGAGGCTGAGTAGCTTGGTTTACGCAGGAGACCAATAAAACTTCAAGACAAGAAGTTTGCACCACTTACGTAGGCCACAGGCGCCCTCTCGAATAGCGGGAGGTGCCTCACCCTAGACACCTTCTCGAGTGGGTCTTAGAAGCCCAGGCATAATTAGTAAGCGTGGTGGGTTCCGCGCTCCAGATGGAGACTCAGCTGGAAGTTAAAGGGAAGAATGACATGGGGAGACCAAGCGTTGGTGAGCAAGGCCCGTAGCTTTAT…	G	intronic	gene-BORCS8
7	10032534	10033827	TTGCGGGGAGCCGGTGAGGCATTCCACTCATGACAAAGGTCATGAGGAAGGAGGCTCGGCATACGCAAAGGCGGGATCGAGCCTCAGGAGTCCACCCGGATATTCTCGAGCATTTTCCCCCAAAAAACCAGAGTCTGCCTACTTTATTGCTTTGTGCTCTCACCTCTGACTTTACTGGGGGCTGTCCCCTACCACCATCTCTCTCTCTCTCTGTCAAAGAGTTAACTTACAGCTCCAATTAATAAAGTTCCTGGGCAATTAGGAGTGTTTAAATCCAAACCCCTCAGATGGCTCTCTAACTCGCCTGACAAGTTTACCCGGACTCCTGCAGCTATGCATACGATTGTTTACAGTCTCCTAGCCTCCAGAGGCACGGGAAGCTTAAGATATTCAAATAGC…	T	intergenic	gene-LOC100295806(dist=8718),gene-LOC100295735(dist=56954)
7	10133641	10142608	GCTGATCCAGGGTATTCGAAGGAGAGACGGCATAGGCGAGGATCAGGATACGATAGCTTCAATTAGGTATTAATTAAAGATATAAAGAGTAATAGAATAAGGATAGCTCAGTAGGAAAATTCAGTGGAGAAAAGAGGCTGAGTAGCTTGGTTTACGCGGGAGACCAATAAAACTTCAAGACAAGAAGCTTGCACCACTTACGTAGGCCGCAGGCGTCCTTCCGTTCTCCCGAAGGAGAGGAGACACTGAGGCCTCCCCGGTCGGATCTTAGAAGCCCAGGCATAATTAGTAAGCATGGTGGGTTCCGCGCTCCAGATGGAGACTCAACCAGAGTGAGAGAGAGAGCGACATGGGGAGACCAGTATTTCGAGAAACTGATCCCAATTCTTTATTTTCCAT…	G	intergenic	gene-LOC785898(dist=28582),gene-LOC786840(dist=12337)
7	10359858	10361079	CCATAGGTGCCGGGGACCAGCCCCGGCTGATCCAGGGTATTCGAAGGAGAGACGGCGTAGGCGAAGATCAGGAAACAATTGCTTAATTAAATGTTAATTAAGGATATAAAGAGTAATAGAATGAGGATAGCTCAGTAGGAAAATTCAGTGAAGAAAAGAGGCTGAAATAAGGATAGCTCAGTGAGGAAATTCAGTGGAGAAAAGAGGCTGAATAATTCAGCCAGAAGGTAAGAGAAAGAACGACATGGTGAGACCAAGTTTCGGTGAACAAGGCCCGCACTTTATTTTTCAAAGTAGTTTTTATACCTTAAGTTATGCACAGAGGATAATGGGGGAAGGGGTAGAGTCTTGCAGCAAACCAGGCTTTCTTCCTGCAAACTTATCATATGCAAAAGCTTA…	C	intergenic	gene-LOC786149(dist=62365),gene-LOC786202(dist=10109)
7	10360265	10360348	GCATCATCTTCTGGCCCGGAGGCCTGTTAACATTTTAAGACCTTTTCTTCAGAAAACTTATTTTTCTCTAAAGGTGATTGGTCA	G	intergenic	gene-LOC786149(dist=62772),gene-LOC786202(dist=10840)
7	12979690	12980752	GATAGGGTGTGGGGAGTGAGCTCCGCCCCTGGCAAAGGTCATGAGGAAGGAGGCTTGGCATACGCAAAGGCGGGATCAAGCCTCAGGAGTCTCCCTGGAAATTCTCGAGCAATCTACCCCCCAAACCAGAGTCTGCCTACTTTCTGCTTTGTGCTTTCACCTACACCTCTGACTTTACGGGGGGCTGTCCCCCACTACCTCTCTGAAAAAAGAGTTAGCTTACAGCTCCAGTTAATAATTCCTGGGTGTGACAGTGTTTCAACCTACAAACTCCCTTGGAAGTCCTCTAGCCTGCCTGAATAGGTTTTTCCGGCCACATGTGATTGCTCAGAGCCTCCAAACTGTGAGAGGCATGAGATGTTCTAAACTGTCTAAATACAGATTCCTTTGAGCAGTCAA…	G	intergenic	gene-LOC784148(dist=14392),NONE(dist=NONE)
7	16697568	16697568	G	GATAAGGTGCCGGGAGCCGGCATATTGCATATTGAGTGCATATTGCATATTGAGTGCAGCACTTTTCAGGATCTGGAATAGCTCAACTGGAATTCTATCACTGCCGGTAGCCAGCGTGAGGAACTCCGCCCATGACAAAGGTCATGAGGAAGGAGGCTCGGCATACGCAAAGGCGGGATCGAGCTTCAGGAGTCCCCCTGGAAATTCTCGAGCATATACCCCCAAAACCAGAATCTGCCTACTTTCTGCTTTGTGCTTTCACCTACACCTCTGACTTTACGGGGGGCTGTCCCCCACTACCTCTCTGAAAAGAGTTAGCTTACAGCTCCAGTTAATAATTCCTGGGTGTGACAGTGTTTAACCTACAAACTCCTTTGGAAATCCTCTAGCCTGCCTGAA…	intergenic	gene-TIMM44(dist=1858),gene-MIR2455(dist=13788)
7	20360833	20360833	C	CAAAGCCTGCCGGGGTCCTGCCCCGACTGATCCAGGGTATTCGAAGCGGGGACGGCGTCGGCGACCTATTTATTTAAATATTTTATCAAAGATATAAAGAGTAATAGGATGAGGATAGCTCAGTAGGAAAATTCAGTGGAGAAAAGAGGCTGAGTAGCTTGGTTTACGCGGGAGACCAATAAAACTTCAAGACAAGAAGTTTGCACCACTTACGTAGGCCGCAGGCGTCCTTCCGTTCTCCCGAAGGAGAGGAGACACTGAGGCCTCCCCGGTCGGATCTTAGAAGCCCAGGCATAATTAGTAAGCATGGTGGGTTCCGCGCTCCAGATGGAGACTCAACCAGAGTGAGAGAGAGAGCGACATGGGGAGACCAGTATTTCGAGAAACTGATCCCAATTC…	intergenic	gene-HMG20B(dist=2170),gene-MFSD12(dist=8182)
7	24960295	24960773	GGGAAAATGCGGGGAGTTGCCCGTGAGACCGGGGTCCTTTGTCCAAAGGACACAGCTCTGGGAGCTGCCTCAGTCCTTGAGGGTTTGCTTGCAAACACAGCTCTCTGTCCCGCCACCCCAGAGATTAGGCGCTTATTTACTGCAGGCACCTGGAGTTCTGTGCAAACTTCTCACGCACAGAGAAATGTTATCTGGTGTAAGAAATAATAACAGGGTGCCATTCCCATGCTCTCAAGATTTCTTGTGACTGTTTGTAAGATGTATAGGTCAACCAAGAAAAAACGTCAACTGTCTTGTCTTTCTCATGCTTTTCTGTATAAATATGAGATGCTGAATAAAGTTGGTGTCAGACTGCGTCCCTTCGTGGAGACGTGTCTGAACCTCTCGATCCCATCTTTG…	G	intergenic	gene-ADAMTS19(dist=281568),gene-ISOC1(dist=14272)
7	26033690	26033950	TTGGGGGCCAGAGTGAGGTACTCCGCCCGTGACAAAGGTCATGAGGAAGGAGGCTCGACATACGCAAAGGCGGGATCGAGCCTCAGGAGTCCCCCTGGAACTCCTCGAGCATCTACCCCCATAACCAGAGCCTGCCTACTTTACTACTTTGTGCTCTTACCTACACCTCTGACTTTACGGGGGGCTGTCCCCCACCACCTCTTTCGGAGAAGGAGTTAACTTAGAGCTCCAGTTTATAATAATTCCTGGGCGTGATAAGAG	TA	intergenic	gene-SLC12A2(dist=180632),gene-CCDC192(dist=143727)
7	26033913	26033993	GAGCTCCAGTTTATAATAATTCCTGGGCGTGATAAGAGTGTTTTAACCTACAAACTCCTCTGAAGGTTCTCTGGCCTGCCT	G	intergenic	gene-SLC12A2(dist=180855),gene-CCDC192(dist=143684)
7	26033948	26034060	GAGTGTTTTAACCTACAAACTCCTCTGAAGGTTCTCTGGCCTGCCTGACAGGCTCGTCCGGCCACATGTGATTGCTCACAGCCTCCCAACCGTGAGAGGCACGAGATGCTTTA	GCC	intergenic	gene-SLC12A2(dist=180890),gene-CCDC192(dist=143617)
7	26033958	26034999	ACCTACAAACTCCTCTGAAGGTTCTCTGGCCTGCCTGACAGGCTCGTCCGGCCACATGTGATTGCTCACAGCCTCCCAACCGTGAGAGGCACGAGATGCTTTAAACCCTCTAAAAACAGGTTCTTTAGAGAAGTTAGAAAACTATTAGTATAAGTATAATGGGCTGATTAGAAATTGTATTGGTGAAGGGTTTTTCATTTGTTGAGCCAATGTTTGTTGCTAAGTCTCCACATCCCCTGCCCTTACACACATTAATGAATATATAGAAGAAATAAGTATTAACCTTTGATATTAATCACGTTAGACCTTAGGCTAAGTAAATTCTTTCCTTAGCTAAAACCCACTACACCCTCACCCTGTAGGAATGTAACTTTACTTGGGTGGCGTCTGTTTTGAGAA…	A	intergenic	gene-SLC12A2(dist=180900),gene-CCDC192(dist=142678)
7	26034143	26034201	AAGGGTTTTTCATTTGTTGAGCCAATGTTTGTTGCTAAGTCTCCACATCCCCTGCCCTT	AG	intergenic	gene-SLC12A2(dist=181085),gene-CCDC192(dist=143476)
7	26034236	26034318	TTAACCTTTGATATTAATCACGTTAGACCTTAGGCTAAGTAAATTCTTTCCTTAGCTAAAACCCACTACACCCTCACCCTGTA	T	intergenic	gene-SLC12A2(dist=181178),gene-CCDC192(dist=143359)
7	26034388	26034452	TGACTGACCGCTGTCACAAGGAGAGGGTCGTAAATTGTCAGCAGGCCCCCCTGGCCAGAAGATGA	T	intergenic	gene-SLC12A2(dist=181330),gene-CCDC192(dist=143225)
7	26034582	26034672	AATTGGGATCAGTTTCTCAAAATACTGGTCTCCCCATGTCTCTCTCTCCCTCCGGCTGAGTCTCCATCTGGAGCGCGGAACCCACCAAGCT	A	intergenic	gene-SLC12A2(dist=181524),gene-CCDC192(dist=143005)
7	26034698	26034792	ATCCGACCGGGGAGGCCTCAGTGTCTCCTCTCCTTCGGGAGAACGGAAGGACGCCTGCGGCCTACGTAAGTGGTGCAAGCTTCTTGTCTTGAAGT	AATTAC	intergenic	gene-SLC12A2(dist=181640),gene-CCDC192(dist=142885)
7	29552525	29552526	CA	CTTTTTTTTTTTTTTTTTTTTTTCGGTGAACAAGGCCCGCACTTTATTTTTCAAAGTAGTTTTTATACCTTAAGTTATGCATAGAGGATAATGGGGGAAGGGGTCGAGTCTTGCAGCAAACCAGGCTTTCTTCCTGCAAACTTATCATATGCAAAAGCTTAGGTGATTTGCATCATCTTCTGGCCCGGAGGCCTGTTAACATTTTAAGACCTTTTCTTCAGAAAACTTATTTTTCTCTAAAGGTGGTTGGTCAGGAGCCACCCTCCAAAAAAGCATTAGATAAAGTTGCATTCCTACAGAGCAAAGGTGTGGTGGGCTATGACAAGAAAAAGAATTAACTCAAGGGTCCCAGGTTACAAACATTAAAGCTACTACTTACACCAATTATATTAATCAATA…	intergenic	gene-ZNF608(dist=427167),gene-LOC107132619(dist=287324)
7	31786860	31788153	GTGCCGGGGACCAGCCCCAGCTGATCCAGGGTACTCGAAGGAGAGACGGCGTCGGCGAGGGTCAGGATACGATAGTTTCAATTAGATATTAATTAGAGATATAAAGAGTAATAGAATAAGGATAGCTCAGTAGGAAAATTCAGTGGAGAAAAGAGGCTGAGTAGCTTGGTTTACGCGGGGGACCAATAAAACTTCAAGACAAGAAGCTTGCACCACTTACGTAGGCCGCAGGCGTCCTTCCGTTCTCCCGAAGGAGAGGAGACACTGAGGCCTCCCCGGTCGGATCTTAGAAGCCCAGGCAAAATTAGTAAGCTTGGTGGGTTCCGCGCTCCAGATGGAGACTCAGCCGGAGGGAGAGAGAGACATGGGGAGACCAGTATTTTGAGAAACTGATCCCAA…	G	downstream	gene-SRFBP1
7	31787397	31787468	CTGGCCAGGGGGGCCTGCTGACAATTTACGACCCTCTCCTTGTGACAGCGGTCAGTCAATCAGGACACTTAT	CAAA	intergenic	gene-LOX(dist=17004),gene-SRFBP1(dist=1276)
7	31787498	31787549	ACGCCACCCAAGTAAAGTTACATTCCTACAGGGTGAGGGTGTAGTGGGTTTT	A	intergenic	gene-LOX(dist=17105),gene-SRFBP1(dist=1195)
7	31787563	31787618	ATTTACTTAGCCTAAGGTCTAACGTGATTAATATCAAAGGTTAATACTTATTTCTT	AC	intergenic	gene-LOX(dist=17170),gene-SRFBP1(dist=1126)
7	31787717	31787772	ATTAGCCCATTATATTTATACTAATAGTTTTCTAACTTCTCTAAAGAACCTGTTTT	ACA	downstream	gene-SRFBP1
7	32988899	32988899	A	ATTTCCTCACTGAGCTATCCTTATTTCAGCCTCTTTTCTCCACTGATTTTCCTCACTGAGCTATCCTTATTTCAGCCTCTTTTCTCCACTGAT	intergenic	gene-FAM170A(dist=201693),NONE(dist=NONE)
7	33007999	33007999	T	TGTAAAGTGCGGGGCACGAGCTCCGCCTCTGGCAAAGGTCATGAGGAAGGAGGCTTGGGATACGCAAAGGCGGGATCAAGCCTCAGGAGTCTCCCTGGAAATTCTCGAGCATATACCCCCAAAACCAGAGTCTGCCTACTTTCTGCTTTGTGTTTTCACCTACACCTCTGACTTTACGGGGGGCTGTCCCCCACTACCTCTCTGAAAAAAGTTAGCTTACAGCTCCAGTTAATAATTCCTGGGTGTGACAGTGTTTAACCTACAAACTCCTTTGGAAATCCTATAGCCTACCTGAATAGGTTTTTCCGGCCACATGTGATTGTTCAGAGCCTCCCAACTGTGAGAGGCAGGAGATGTTCTAAACTGTCTAAACACAGATTCTTTTGAGTAGTTAAAAGA…	intergenic	gene-FAM170A(dist=220793),NONE(dist=NONE)
7	34104561	34104561	C	CAAAAAGTAAAAAAGCAAGCAGGAATAGAAGGAACATACCTCAACATAATAAAAGCTATATATGAAAAACCCACAGCAAACATTATCCTCAATGGTGAAAAATTGAAAGCATTTCCTCTAAAGTCAGGAACAAGACAAGGGTGCCCACTTTCACCATTACTATTCGACATAGTTTTGGAAGTTTTGGCCACAGCAATCAGAGCAGAAAAAGAAATAAAAGGAATCCAAATTGGAAAAGAAGAAGTAAAACTCTCACTGTTTGCAGATGACATGATCCTTTACATAGAAAACCCTAAAGACTCCACCAGAAAATTACTAGAACTAATCAATGATTATAGTAAAGTTGCAGGATATAAAATCAACACACAAAAATCCCTTGCATTCCTATACACTAATAAT…	intergenic	gene-PRR16(dist=715444),gene-LOC540403(dist=131289)
7	34104561	34104561	C	CAAAAAGTAAAACAGCAAGCAGGAATAGAAGGAACATACCTCAACATAATAAAAGCTATATATGACAAACCCACAGCAAACATTATCCTCAATGGTGAAAAATTGAAAGCATTTCCTCTAAAGTCAGGAACAAGACAAGGGTGCCCACTTTCACCATTACTATTCGACATAGTTTTGGAAGTTTTGGCCACAGCAATCAGAGCAGAAAAAGAAATAAAAGGAATCCAAATTGGAAAAGAAGAAGTAAAACTCTCACTGTTTGCAAATGACATGATCCTTTACATAGAAAACCCTAAAGACTCCACCAGAAAATTACTAGAACTAATCAATGATTATAGTAAAGTTGCAGGATATAAAATCAACACACAAAAATCCCTTGCATTCGTATACACTAATAAT…	intergenic	gene-PRR16(dist=715444),gene-LOC540403(dist=131289)
7	57121858	57122937	CTGCGGGGAGCGAGCTCCGCCTCTGGCAAAGGTCATGAGGAAGGAGGCTTGGCATACGCAAAGGCGGGATCAAGCCTCAGGAGTCTCCCTGGAAATTCTCGAGCAATCTACCCCCAAAGCCAGAGTCTGCCTACTTTCTGCTTTGTGCTTTCACCTACACCTCTGACTTTACGGGGGGCTCTCCCCAACGACCTCTCTGAAAAAAGAGTTAGCTTACAGCTCCAGTTAATAATTCCTGGGTGTGACAGTGTTTAACCTACAAACTCCTTTGGAAATCCTCTAGCCTGCTTGAATAGGTTTTTCCGGCCACATGTGATTGTTCAGAGCCTCCCAACTGTGAGAGGCAGGAGATGTTCTAAACTGTCTAAACACAGATTCTTTTGAGTAGTTAAAAGATTG…	CCATA	intergenic	gene-GRXCR2(dist=35151),gene-SH3RF2(dist=22501)
7	57122141	57122206	CCTGCTTGAATAGGTTTTTCCGGCCACATGTGATTGTTCAGAGCCTCCCAACTGTGAGAGGCAGGA	C	intergenic	gene-GRXCR2(dist=35434),gene-SH3RF2(dist=23232)
7	57603901	57605203	TGCGGCATGCCGGGGACCAGCCCCGGCTGATCCAGGGTATTCGAAGGAGAGACGGCATAGGCGAGGATCAGGATACGATAGCTTCAATTAGGTATTAATTAAAGATATAAAGAGTAATAGAATAAGGATAGCTCAGTAGGAAAATTCAGTGGAGAAAAGAGGCTGAGTAGCTTGGTTTACGCGGGAGACCAATAAAACTTCAAGACAAGAAGCTTGCACCACTTACGTAGGCCGCAGGCGTCCTTCCGTTCTCCCGAAGGAGAGGAGACACTGAGGCCTCCCCGGTCGGATCTTAGAAGCCCAGGCATAATTAGTAAGCATGGTGGGTTCCGCGCTCCAGATGGAGACTCAGCCAGAGTGAGAAAGAGAGCGACATGGGGAGACCAGTATTTCGAGAAA…	T	intergenic	gene-POU4F3(dist=66467),gene-TCERG1(dist=41375)
7	57604054	57604140	GAAAAGAGGCTGAGTAGCTTGGTTTACGCGGGAGACCAATAAAACTTCAAGACAAGAAGCTTGCACCACTTACGTAGGCCGCAGGCG	GC	intergenic	gene-POU4F3(dist=66620),gene-TCERG1(dist=42438)
7	57604221	57604281	TGGTGGGTTCCGCGCTCCAGATGGAGACTCAGCCAGAGTGAGAAAGAGAGCGACATGGGGA	T	intergenic	gene-POU4F3(dist=66787),gene-TCERG1(dist=42297)
7	57604381	57604487	GACTTTTATCAAAGTCAGGTGCTTCATACAAATGTATACAGAGGTCTTAGGGGTGTTACATCATCTTCTGGCCAGGGGGGCCTGCTGACAATTTACGACCCTCTCCT	G	intergenic	gene-POU4F3(dist=66947),gene-TCERG1(dist=42091)
7	58876101	58877263	GACTTCCTGCGAGCTCCGCCTCTGGCAAAGGTCATGAGGAAGGAGGCTTGGCATACACAAAGGCGGGATCAAGCCTCAGGAGTCTCCCTGGAAATTCTCGAGCAATCTACCCCCAAAACCAGAGTCTGCCTACTTTCTGCTTTGTGCTTTCACCTACACCTCTGACTTTACGGGGGGCTGTCCCCCACTACCTCTCTGAAAAAAGAGTTAGCTTACAGCTCCAGTTAATAATTCCTGGGTGTGACAGTGTTTAACCTACAAACTGCTTTGGAAATCCTCTAGCCTGCCTGAATAGGTTTTTCCGGCCACATGTGATTGTTCAGAGCCTCCCAACTGTGAGAGGCAGGAGATGTTCTAAACTGTGTAAACACAGATTCTTTTGAATAGTTAAAAGATTGA…	G	intronic	gene-JAKMIP2
7	64372404	64373685	GGATAAGTGTTGGGGGCCAGAGTGAGGTACTCCGCCCATGACAAAGGTCATGAGGAAGGAGGCTCGACATACGCAAAGGCGGGATCGAGCCTCAGGAGTCCCCCTGGAACTCCTCGAGCATCTACCCCCATTACCAGAGCCTGCCTACTTTACTACTTTGTGCTGTTACCTACACCTCTGACTTTATGGGGGGCTGTCCCCCACCACCTCTTTCAGAGAAGGAGTTAACCTAGAGCTCCAGTCAATAAAAACTCTTGGGTGTGACAAGAGTGTTTTAACCTACAAACTCCTCTGAAGGTTCTCTAGCTTGCCTGACAGGCTCGTCCAGCCACATGTGATTGCTCACAGCCTCCCAACCGTGAGAGGCACAAGATGCTTTAAACCCTCTAAAAACAGGTT…	G	intergenic	gene-NMUR2(dist=718522),gene-GRIA1(dist=398126)
7	67398097	67398563	GGGGAAAATAAGTTTTCTGAAGAAAAGGTCTTAAAATGTTAACAGGCCTCCGGGCCAGAAGATGATGCAAATCACCTAACTTTTGCATATGCTAAGTTTGCAGGAAGAAAGCCTGGCTTGCTGCCTGACTCTACCCCTTCCCCCATTATCCTCTATGCATAACTTAAGGTATAAAAACTACTTTGGAAAATAAAGTACGGGCCTTGTTCACCTAAACTTGGTCTCCCCATGTCGTTCTTTCTCTTACCTTCTGGCTGAATTATTCAGCCTCTTTTCTCCACTGAATTTCCTCACTGAGCTATCCTTATTTCAGCCTCTTTTCTCCACTGAATTTCCTTACTGAGCTATCCTTATTCCATTACTCTTTATATCCTTAATTAATGTTTAATTAAGCAATTG…	G	intronic	gene-SGCD
7	67398098	67398098	G	GGTTCCTGCGGGGAGCGAGCTCCGCCTCTGGCAAAGGTCATGAGGAAGGAGGCTTGGCATACTCAAAGGCGGGATCAAGCCTCAGGAGTCTCCCTGGAAATTCTCGAGCATATACCCCCAAAACCAGAGTCTGCCTACTTTCTGCTTTGTGCTTTCACCTACACCTCTGACTTTACGGGGGGCTGTCCCCCACTACCTCTCTGAAAAAAGTTAGCTTACAGCTCCAGTTAATAATTCCTGGGTGTGACAGTGTTTAACCTACAAACTCCTTTGGAAATCCTCTAGCCTGCCTGAATAGGTTTTTCCGGCCACATCTGATTGTTCAGAGCCTCCCAACTGTGAGAGGCAGGAGATGTTCTAAACTGTGTAAACACAGATTCTTTTGAATAGTTAAAAGAT…	intronic	gene-SGCD
7	70827799	70827799	T	TATTACAATGCCGAGGACCAGCCCCGGCTGATCCAGGGTATTCGAAGGAGAGACGGCATAGGCGAGGATCAGGATACGATAGCTTAATTAAACGTTAATTAAGGATATAAAGAGTAATAGAATGAGGATAGCTCAGTAGGAAAATTCAGTGGAGAAAAGAGGCTGAGTAGCTTGGTTTACTTGGGAGACCAATAAAACTTCAAGACAAGAAGTTTGCACCACTTACGTAGGCCGCAGGCGTCCTTCCGTTCTCCCGAAGCAGAGGAGACACTGAGGCCTCCCCGGTCGGATCTTAGAAGCCCAGGCATAATTAGTAAGCATGGTGGGTTCCGCGCTCCAGATGGAGACTCAACCAGAGTGAGAGAGAGAGTGACATGGGGAGACCAGTATTTCGAGAAA…	intergenic	gene-RNF145(dist=30988),gene-UBLCP1(dist=23430)
7	74811734	74812176	GCCGGGAGCCGGTGAGGCATTCCACTTGTGACAAAGGTCATGGGGACCTTTGTATCCCTTGCGTATCCCTCGGCATACGCAAAGGCGGGATCGAGCCTCAGGAGTCCGCCCGGATATTCTCGAGCATTTTCCCCCCAAAAACCAGAGTCTGCCTACTTTATTGCTTTGTGCTCTCACCTCTGACTTTACTGGGGGCTGTCCCCTACCACCATCTCGCTCTCTCTCTGTCAAAGAGTTAACTTACAGCTCCAATTAATAAAGTTCCTGGGCAATTAGGAGTGTTTAAATCCAAACCCCTCAGATGGCTCTCTAACTCGCCTGACAAGTTTACCCGGACTCCTGCAGCTATGCATACGATTGTTTACAGTCTCCTAGCCTCCAGAGGCACGGGAAGCTTAA…	GG	intergenic	gene-GABRG2(dist=910275),gene-CCNG1(dist=303769)
7	74812187	74812469	AGTAAAGGATTTCATTGATGAGTCAATGCTTGTTGCCAAGTTTTCACATCCCCTGAATTGTATCCTTGAATGTGTATTAATTAATAGTTGGTATATAGAAAAAAATAAGTAGTGGCCTTGGTGTTAGTAACTTTAGACCCTTAAGGTAATAAATTATTTTCTTTGTTGTAAACCCATTACACATCCGCCCTATAGGAATGCAATTTTATCTGTGGAAGATGGCGCCAAACCTTAAAATAATTACTCTTAGAGAAAATAAGTCTTTGTTGATAAGTTCTTGTCA	ACACTG	intergenic	gene-GABRG2(dist=910728),gene-CCNG1(dist=303476)
7	74812509	74812950	AATGTAAATCACCTAAACCATTTGTATACGATAAATTTGCAGGAAAGAAACCTTGGTTTTTGATAAGAATCAAAGACTGCTGACTTTGCATCCCCTATTATCCTCTATGTGTAACTTAGGGTATAAAAGCCCCTGTTAAAAATAAAGCTATGGGCCTTGCTCACCAACGCTTGGTCTCCCCATGTCATTCTTCCCTGTAACTTCCAGCTGAGTCTCCATCTGGAGCGCGGAACCCACCACGCTTACTAATTATGCCTGGACTTCTAAGACCCACTCGAGAAGGTGTCTAGGGTGAGGCACCTTCCGCTATTCGAGAGGGCGCCTGCGGCCTACGTAAGTGGTGCAAACTTCTTGTCTTTAAGTTGTCTTGAAGTAAACCAAGCTACTCAGCCTCTTTTC…	AGG	intergenic	gene-GABRG2(dist=911050),gene-CCNG1(dist=302995)
7	74812963	74813034	TTAGCATATAAATAGTCGCCTAGGCCGTCTCTCCTTCGAATACCCTGGATCAGCTGGGGCTGGTCCCCAGCA	TCTG	intergenic	gene-GABRG2(dist=911504),gene-CCNG1(dist=302911)
7	81098912	81100189	TCTTGGTTGTTGGGGGCCAGAGTGAGGTACTCCGCTCATGGCAAAGGTCATGAGGAAGGAGGCTCGACATACGCAAAGGCGGGATCGAGCCTCAGGAGTCCCCCTGGAAATCCTCGAGCGTCTACCCCCATAACCAGAGCCTGCCTACTTTACTACTTTGTGCTCTTACCTACACCTCTGACTTTACGGGGGGCTGTCCCCCACCACCTCTTTCGGAGAAGGAGTTAACCTAGAGCTCCAGTCAATAAAAACTCTTGGGTGTGACAAGAGTGTTTTAACCTACAAACTCCTCTGAAGGTTCTCTAGCCTGCCTGACAGGCTCGTCCGGCCACATGTGATTGCTCACAGCCTCCCAACCGTGAGAGGCACGAGATGCTTTAAACCTTCTAAAAACAGGTT…	T	intronic	gene-RASGRF2
7	81127670	81128723	AAATATATTGCCGGGGTCCAGCCCCGGTGGATCCAGGGAATTCGAAGCGGGGACGGCGTCGGCGAGGATCAGGAAACAACTGCTTAATTAAACGTTAATTAAGGATATAAAGAGTAATAGAATAAGGATAGCTCAGTGAGGAAATTCAGTGGAGAAAAGAGGCTGAATAATTCACCCAGAAGGTAAGAGAAAGAACGACATGGTGAGACCAAGTTTCGGTGAACAAGGCCCGCACTTTATTTTCCAAAGTAGTTTTTATACCTTAAGTTATGCATAGAGGATAATGGGGGAAGGGGTAGAGTCATGCAGTAAGCCAGGCTTTCTTCCTGCAAACTTATCATATGCAAAAGTTTAGGTGATTTGCATCATCTTCTGGCCCGGAGGCCTTTTTCTCTAAAG…	A	intronic	gene-RASGRF2
7	85309490	85309490	T	TGTGTGTTTGTGCCGAGGACCAGCCCCGGCTGATCCAGGGTATTCGAAGGGGAGACGGCGTCGGCGACTATTTATATGCTAATTAGAGATATAGA	intergenic	gene-EDIL3(dist=985434),gene-COX7C(dist=979256)
7	85309491	85310490	GAACAATAGAATGAGGATAGCTCAGTAGGAAAATTCAGTGGAGAAAAGAAGCTGAGTAGCTTGGTTTACGCGGGAGACCAATAAAACTTCAAGACAAGAAGTTTGCACCACTTACGTAGGCCGCAGGCGCCCTCTCGAATAGCGGAAGGTGCCTCACCCTAGACACCTTCTCGAGTGGGTCTTAGAAGCCCAGGCATAATTAGTAAGCGTGGTGGGTTCCGCGCTCCAGATGGAGACTCAGCTGGAAGTTAAAAGAAAGAATGACATGGGGAGACCAAGCGTTGGTGAGCAAGGCCCGTAGCTTTATTTTTAACAGGGGCTTTTATACCCTAAGTTACACATAGAGGATAATAGGGGATGCAAAGTCAGCAGTCTTTGATTCTTATCAAAAACCAGGGT…	G	intergenic	gene-EDIL3(dist=985435),gene-COX7C(dist=978256)
7	85310489	85310491	GTT	GAGAGAGAGAGATGGTGGTAGGGGACAGCCCCCAGTAAAGTCAGAGGTGAGAGCACAAAGCAATAAAGTAGGCAGACTCTGGTTTTTTGGGGGAAAATGCTCGAGAATATCCGGGGGGACTCCTGAGGCTCGATCCCGCCTTTGCGTATGCCAAGCCTCCTTCCTCATGACCTTTGTCATGAGTGGAATGCCTCACCGTCTCCCC	intergenic	gene-EDIL3(dist=986433),gene-COX7C(dist=978255)
7	86154473	86154473	T	TACTAAAGTGCCGGGAGCCGGCATATTGCATATTGAGTGCATATTGCATATTGAGTGCAGCACTTTTCAGGATCTGGAATAGCTCAACTGGAAATTCTATCACTGCCGGTAGCCAGCGTGAGGAACTCCACCCATGACAAAGGTCATGAGGAAGGAGGCTCGGCATACGCAAAGGCGGGATCGAGCTTCAGGAGTCCCCCTGGAAATTCTCGAGCATATACCCCCAAAACCAGAGTCTGCCTACTTTCTGCTTTGTGCTTTCACCTACACCTCTGACTTTACGGGGGGCTGTCCCCCACTACCTCTCTGAAAAAAGTTAGCTTACAGCTCCAGTTAATAATTCCTGGGTGTGACAGTGTTTAACCTACAAACTCCTTTGGAAATCCTCTAGCCTGCCTG…	intergenic	gene-EDIL3(dist=1830417),gene-COX7C(dist=134273)
7	88765921	88767223	TGAAAATTGCCGGGGACCAGCCCCGGCTGATCCAGGGTATTCGAAGGAGAGACGGCGTCGGCGAGGGTCAGGATACGATAGCTTCAATTAGGTATTAATTAAAGATATAAAGAGTAATAGAATAAGGATAGCTCAGTAGGAAAATTCAGTGGAGAAAAGAGGCTGAGTAGCTTGGTTTACGCGGGAGACCAATAAAACTTCAAGACAAGAAGTTTGCACCACTTACGTAGGCCGCAGGCGTCCTTCCGTTCTCCCGAAGGAGAGGAGACACTGAGGCCTCCCCGGTCGGATCTTAGAAGCCCAGGCATAATTAGTAAGCATGGTGGGTTCCGCGCTCCAGATGGAGACTCAACCAGAGTGAGAGAGAGAGCGACATGGGGAGACCAGTATTTCGAGAAA…	T	intergenic	gene-MEF2C(dist=340092),gene-MIR3660(dist=790880)
7	88766198	88766280	CTCCCCGGTCGGATCTTAGAAGCCCAGGCATAATTAGTAAGCATGGTGGGTTCCGCGCTCCAGATGGAGACTCAACCAGAGTG	CCA	intergenic	gene-MEF2C(dist=340369),gene-MIR3660(dist=791823)
7	88766370	88766491	TATACAAAAGTCACGTGGGGACAGCAGTCCTGACTTTTATTAAAGTCAGGTGCTTCACACAAATGTATACAGAGGTCTTAGGGGTGTTACATCATCTTCTGGCCAGGGGGGCCTGCTGACAA	T	intergenic	gene-MEF2C(dist=340541),gene-MIR3660(dist=791612)
7	93905487	93905487	T	TAGGTGTGTGCGGGGAGCGAGCTCCGCCTCTGGCAAAGGTCATGAGGAAGGAGGCTTGGCATACGCAAAGGCGGGATCAAGCCTCAGGAGTCTCCCTGGAAATTCTCGAGCAATCTACCCCCAAAACCAGAGTCTGCCTACTTTCTGCTTTGTGCTTTCACCTACACCTCTGACTTTACGGGGGGCTGTCCCCCACTACCTCTCTGAAAAAAGTTAGCTTACAGCTCCAGTTAATAATTCCTGGGTGTGACAGTGTTTAACTTACAAACTCCTTTGGAAATCCTCTAGCCTGCCTGAATAGGTTTTTCCGGCCTCATGTGATTGTTCAGAGCCTCCCAACTGTGAGAGGCAGGAGATGTTCTAAACTGTCTAAATACAGATTCTTTTGAGTAGTTAAAA…	intronic	gene-KIAA0825
7	94328927	94328927	T	TATTTTCTTGCCGGGAGCCGGCATATTGCATATTGAGTGCATATTGCATATTGAGTGCAGCACTTTTCAGGATCTGGAATAGCTCAACTGGAAATTCTATCACTGCCGGTAGCCAGCGTGAGGAACTCCGCCCATGACAAAGGTCATGAGGAAGGAGGCTCGGCATACGCAAAGGCGGGATCGAGCTTCAGGAGTCCCCCTGGAAATTCTCGAGCATATACCCCCAAAACCAGTCTGCCTACTTTCTGCTTTGTGCTTTCACCTACACCTCTGACTTTACGGGGGGCTGTCCCCCACTACCTCTCTGAAAAAAGTTAGCTTACAGCTCCAGTTAATAATTCCTGGGTGTGACAGTGTTTAACCTACAAACTCCTTTGGAAATCCTCTAGCCTGCCTGAA…	intronic	gene-MCTP1
7	94959533	94959617	ACAGGGAGGGAGCGGAATGCCTCACCGGCTCCCGGCATCGTCATGAGGAAGGAGGCTCGGCATACGCAAAGGCGGGATCGAGCCT	A	intergenic	gene-GPR150(dist=21170),gene-RFESD(dist=4825)
7	96011834	96011834	G	GCTTCCCTGCGGGGAGCCGGTGAGGCATTCCACTCGTGACAAAGGTCATGAGGAAGGAGGCTCGGCATACGCAAAGGCGGGATCGAGCCTCAGGAGTCCCCCCGGATATTCTCGAGCATTTTCCCCCAAAAAACCAGAGTCTGCCTACTTTATTGCTTTGTGATCTCACCTCTGACTTTACTGGGGGCTGTCCCCTACCACCATCTCTCTCTCTGTGTGTCAAAGAGTTAACTTACAGCTCCAATTAATAAAGTTCCTGGGCAATTAGGAGTGTTAAAATCCAAACCCCTCTGATGGCTCTCTAACTCGCCTGACAAGTTTACCCGGACTCCTGCAGCTATGCATACGATTGTTTACAGTCTCCTAGCCTCCAGAGGCACGGGAAGCTTAAGATAGTCA…	intergenic	gene-PCSK1(dist=221724),gene-CAST(dist=22394)
7	96299287	96299287	T	TGGTGCATGCCGAGAGCCGGCATATTGCATATTGAGTGCATATTGCATATTGAGTGCAGCACTTTCCACAGCATCATCTTTCAGGATCTGGAATAGCTCAACTGGAATTCTATCACTGCCGGGAGCCAGCGTGAGGAACTCCGCCCATGACAAAGGTCATGAGGAAGGAGGCTCGGCATACGCAATGGCGGGATCGAGCTTCAGGAGTCCCCCTGGAAATTCTCGAGCATATACCCCCAAAACCAGAGTCTGCCTCCTTTCTGCTTTGGGCTTTCACCTACACCTCTGACTTTACGGGGGGCTGTCCCCCACTACCTCTCTGAAAAAAGAGTTAGCTTACAGCTCCAGTTAATAATTCCTGGGTGTGACAGTGTTTAACCTACAAACTCCTTTGGAAAT…	intergenic	gene-ERAP1(dist=95124),gene-ERAP2(dist=4936)
7	96328835	96329989	TATAAGGGTGCCGGCCGGCTGATCCAGGGTTTTCGAAGGAGAGACGGCATAGGCGAAGATCAGGAAACAACTGCTTAATTAAACTTTAATTAAGGATATAAAGAGCAATAGAATAAGGATAGCTCAGTGAGGAAATTCAGTGGAGAAAAGAGGCTGAATAATTCAGCCAGAAGGTAAGAGAAAGAACGACATGGTGAGACCAAGTTTCGGTGAACAAGGCCCGCACTTTATTTTCCAAAGTAGTTTTTATACCTTAAGTTATGCATAGAGGATAATGGGGGAAGGGGTAGAGTCAGGCAGCAAGCCAAGCTTTCTTCCTGCAAACTTATCATATGCAAAAGCTTAGGTGATTTGCATCATCTTCTGGCCCGGAGGCCTGTTAACATTTTAAGACCCTTT…	T	intronic	gene-ERAP2
7	99147763	99147763	T	TTTTAGCTGCGGGGAGCCGGTGAGGCATTCCACTCATGACAAAGGTCATGAGGAAGGAGGCTCGGCATACGCAAAGGCGGGATCGAGCCTCAGGAGTCCCCCCGGATATTCTCGAGCATTTTCCCCCAAAAAACCAGAGTCTGCCTACTTTATTGCTTTGTGCTCTCACCTCTGACTTTACTGGGGGCTGTCCCCTACCACCATCTCTCTCTCTCTGTCAAAGAGTTAACTTACAGCTCCAATTAATAAAGTTCCTGGGCAATTAGGAGTGTTTAAATCCAAACCCCTCAGATGGCTCTCTAACTCGCCTGACAAGTTTACCCGGACTCCTGCAGCTATGCATACGATTGTTTACAGTCTCCCAGCCTCCAGAGGCATGGGAAGCTTAAGATATTCAAA…	intergenic	gene-CHD1(dist=993260),gene-FAM174A(dist=660472)
7	101000000	101375790	GAAAAAGTGCCGGGAGCCGGCATATTGCATATTGAGTGCATATTGCGTATTGCATATTGAGTGCAGCACTTTCCACAGCATCATCTTTCAGGATCTGGAATAGCTCAACTGGAATTCTATCACTGCCGGTAGCCAGCGTGAGGAGCTCCGCCCATGACAAAGGTCATGAGGAAGGAGGCTCGGCATATGCAAAGGTGGGATCAAGCCTCAGGAGTCCCCCTGGAAATTCTCGAGCATTTACACCCAAAACCAGAGTCTGCCTACTTTCTGCTTTGTGCTTTCACCTACACCTCTGACTTTACGGGGGGCTGTCCCCCACTACCTCTTTGAAAATAGAGTTAGCTTACAGCTCCAGTTAATAGTTCCTGGGTGTGACAGTGTTTCAACCTACAAACTCCT…	G	intergenic	gene-SLCO4C1(dist=19926),gene-SLCO6A1(dist=22381)
7	102000000	101609318	G	GCAGGAGACCCTGGTTCAATTCCTGGGTCAGGAAGATCCCCTGGAGAAGGGATAGGCTACCCACTCCAGTATTCTTGGGCTTCCCTTGTGGCTCAGCTGTTAAAGAATCTGCCTGCCGGGGTCCAGCCCCGGTGGATCCAGGGAATTCGAAGCGGGGACGGCGTCGGCGAGGATCAGGAAACAACTGCTTAATTAAACTTTAATTAAGGATATAAAGAGTAATAGAATAAGGATAGCTCAGTGAGGAAATTCAGTGGAGAAAAGAGGCTGAATAATTCAGCCAGAAGGTAAGAGAAAGAACGACATGGGGAGACCAAGTTTCGGTGAACAAGGCCCGCACTTTATTTTCCAAAGTAGTTTTTATACCTTAAGTTATCCATAGAGGATAATGGGGGAAGG…	intergenic	gene-SLCO6A1(dist=97715),gene-PAM(dist=141214)
7	105000000	105255182	T	TGCAGGTTTGTGCCGGGGACCAGCCCCGGCTGAACCAGGGTATTCGAAGGAGAGACGGCGTAGGCGAAGATCAGGAAACAATTGCTTAATTAAATGTTAATTAAGGATATAAAGAGTAATAGAATGAGGATAGCTCAGTAAAATTCAGTGAAGAAAAGAGGCTGAAATAAGGATAGCTCAGTGAGGAAATTCAGTGGAGAAAAGAGGCTGAATAATTCAGCCAGAAGGTAAGAGAAAGAACGACATGGTGAGACCAAGTTTCGGTGAACAAGGCCCGCACTTTATTTTTCAAAGTAGTTTTTATACCTTAAGTTATGCACAGAGGATAATGGGGGAAGGGGTAGAGTCTTGCAGCAAACCAGGCTTTCTTCCTGCAAACTTATCATATGCAAAAGCTTA…	intergenic	gene-LOC112447533(dist=1571163),gene-TRNAC-ACA-38(dist=1068800)
7	106000000	105524693	A	AGTGGGCCTTAGAAAGCATCACTACGAACAAAGCTAGTAGAGGTGATGGAATTCCAGTTGAGCTGTTCCAAATCCTGAAAGATGATGCTGTGAGAGTGCTATACTCAATATGCCAGCAAATTTGGAAAACTGACCTAGAGCCAGACATCATGGAAT	intergenic	gene-LOC112447533(dist=1840674),gene-TRNAC-ACA-38(dist=799289)
7	108000000	108408644	TC	TAGCGCTCTGCATATTGTGCACGCAGTCTGTTTTAAAATCTCCACTGTTCAAAAAACTTATCTTCCTCAGGCTTAGGCAACACTTTGAGAGGCTTTGGGGGCAAAGTGGGTAACTCTTGGGCCCTGAAAGGTGCAAACGGAGGCGGCAGCGATCGCCTTAAATCAGAAAGTGGTGGATACTTTTTTTTTTTTTTTTTAAGATTTGCGCAGGGGGGGTGGGGGGGGAGGGGGAGCTCGCCAGGGCACCTGGTCACAGCGTCTCTTACAGTCTCTCTCTCTCTTCCTCTCTTCCTGCTTTTCTCACTTGTCTCTCCCCCTTCCTTTTTTGCTACCCTTCTCTTTCCTTCGTTTCTTTCCCTTTACCCTCTTCTCTTCCCTAATTTTTTTTTTTTTTTTATC…	intergenic	gene-LOC112447569(dist=44315),gene-PJA2(dist=34116)
7	109000000	109226835	T	TACTTCACTGTTGGGGGCCAGAGTGAGGTACTCCGCCCGTGACAAAGGTCATGAGGAAGGAGGCTCGACATACGCAAAGGCGGGATCGAGCCTCAGGAGTCCCCCTGGAACTCCTCGAGCATCTACCCCCATAACCAGAGCCTGCCTACTTTACTACTTTGTGCTCACCTACACCTCTGACTTTACGGGGGGCTGTCCCCCACCACCTCTTTTGGAGAAGGAGTTAACTTAGAGCTCCAGTTTATAATAATTCCTGGGCGTGATAAGAGTGTTTTAACCTACAAACTCCTCTGAAGGTTCTCTAGCCTGCCTGACAGGCTCGTCCGGCCACATGTGATTGCTCACAGCCTCCCAACCGTGAGAGGCACAAGATGCTTTAAACCCTCTAAAAACGGGTTC…	intergenic	gene-MAN2A1(dist=221021),gene-TMEM232(dist=238573)
7	110000000	110111177	C	CTGCAGTTGCCGGGGACCAGCCCCGGCTGATCCAGGGTATTCGAAGGAGAGACGGCGTCGGCGAGGGTCAGGATACGATAGCTTCAATTAGATACTAATTAGAGATATAAAGAGTAATAGAATAAGGATAGCTCAGTAGGAAAATTCAGTGGAGAAAAGAGGCTGAGTAGCTTGGTTTACGCGGGGGACCAATAAAACTTCAAGACAAGAAGCTTGCACCACTTACGTAGGCCGCAGGCGTCCTTCCGTTCTCCCAAAGGAGAGGAGACACTGAGGCCTCCCCGGTCGGATCTTAGAAGCCCAGGCATAATTAGTAAGCATGGTGGGTTCCGCGCTCCAGATGGAGACTCAGCCAGAGTGAGAGAGAGAGCGACATGGGGAGACCAGTATTTCGAGAAA…	intergenic	gene-TSLP(dist=2064),gene-WDR36(dist=54377)
7	110000000	110252375	CCCTTTCTGTTGGGGGCCAGAGTGAGGTACTCCGCCCGTGACAAAGGTCATGAGGAAGGAGGCTCAACATACGCAAAGGCGGGATCGAGCCTCAGGAGTCCCCCTGGAACTCCTCGAGCATCTGCCCCCATAACCAGAGCCTGCCTACTTTACTACTTTGTGCTCTTACCTACACCTCTGACTTTACGGGGGGCTGTCCCCCACCACCTCTTTCGGAGAAGGAGTTAACCTAGAGCTCCAGTTAATAATAATTCCTGGGCGTGATAAGAGTGTTTTAACCTACAAACTCCTCTGAAGGTTCTCTAGCCTGCCTGACAGGCTCGTCCAGCCACATGTGATCGCTCACAGCCTCCCAACCGTGAGAGGCACAAGATGCTTTCAACCCTCTAAAAACAGGTT…	C	intergenic	gene-WDR36(dist=42069),gene-CAMK4(dist=43170)
8	1423586	1423586	A	AAAATTGCCGGGGTCCTGCCCCGGCTGATCCAGGGTATTCGAAGCGGGGACAGCGTCGGCGACCTATTTATTTAAATATTTTATCAAAGATATAAAGAGTAATAGGATGAGGATAGCTCAGTAGGAAAATTCAGTGGAGAAAAGAGGCTGAGTAGCTTGGTTTACGCGGGAGACCAATAAAACTTCAAGACAAGAAGTTTGCACCACTTACGTAGGCCGCAGGCGTCCTTCCGTTCTCCCGAAGGAGAGGAGACACTGAGGCCTCCCCGGTCGGATCTTAGAAGCCCAGGCATAATTAGTAAGCATGGTGGGTTCCGCGCTCCAGATGGAGACTCAACCAGAGTGAGAGAGAGAGCGACATGGGGAGACCAGTATTTCGAGAAACTGATCCCAATTCTT…	intronic	gene-NEK1
8	2422402	2422403	GC	GTTGAGTTTTCCAAATTTGCTGGCATAGTGAGTGCAGCACTTTCACAGCATCGTCTTTCAGGATTTGGCATAGCTCAACTGGAATTCCATCACCTCCACTAGCTTTGTTGGTAGTGATGCTTTCTAAGGCCCACTGGACTTCACATTCCAGGATGTCTGGCTCTAGGTGAGTGATCACACCTCGTGATTATCTGGGTCATGAAGAT	intergenic	gene-LOC520638(dist=421900),gene-GALNTL6(dist=1517689)
8	5946754	5946848	GTCAAGTGCGCCTTAGGAAGCATCACTACGAACAAAGCTAGTGGAGCTTTCAATTCCACTTGAGCTTTTTCAAATCCTAAAAGATGATGCTATGA	G	intergenic	gene-LOC781304(dist=33203),gene-FBXO8(dist=609051)
8	11229672	11230960	GGAAAACTGCCGGGGACCAGCCCCGGCTGATCCAGGGTATTCGAAGGAGAGACGGCGTCGGCGAGGGTCAGGACACGATAGCTTCAATTAGATACTAATTAGAGATATAAAGAGTAATAGAATAAGGATAGCTCAGTAGGAAAATTCAGTGGAGAAAAGAGGCTGAGTAGCTTGGTTTATGCGGGGGACCAATAAAACTTCAAGACAAGAAGCTTGCACCACTTACGTAGGCCGCAGGCGTCCTTCCGTTCTCCCAAAGGAGAAGAGACACTGAGGCCTCCCCGGTCGGATCTTAGAAGCCCAGGCAAAATTAGTAAGCATGGTGGGTTCCGCGCTCCAGATGGAGACTCAGCCAGAGGGAGAGAGAGACATGGGGAGACCAGTATTTCGAGAAACTGA…	G	intergenic	gene-CLU(dist=35167),gene-TMEM215(dist=99204)
8	11437924	11437924	C	CATCTGATGCCGGGAGCCGGCATATTGCATATTGAGTGCATATTGCATATTGAGTGCAGCACTTTTCAGGATCTGGAATAGCTCAACTGGAAGTCTATCACTGCCAGGACCCAGCGTGAGGAGGAACTCCGCCCATGACAAAGGTCATGAGGAAGGAGGCTTGGCATACGCAAAGGCGGGATCAAGCCTCAGGAGTCTCCCTGGAAATTCTCGAGCAATCTACCCCCAAAACCAGAGTCTGCCTACTTTCTGCTTTGTGCTTTCACCTACACCTCTGACTTTACGGGGGGCTGTCCCCCACTACCTCTCTGAAAAAAGTTAGCTTACAGCTCCAGTTAATAATTCCTGGGTGTGACAGTGTTTAACCTACAAACTCCTTTGGAAATCCTCTAGCCTGCC…	intergenic	gene-TMEM215(dist=100984),gene-NDUFB6(dist=66803)
8	14687616	14688739	TAGAAAGGTGCGGGGAGCGAGCTCCGCCTCTGGCAAAGGTCATGAGGAAGGAGGCTTGGCATACGCAAAGGCGGGATCAAGCCTCAGGAGTCTCCCTGGAAATTCTCGAGCAATCTACCCCCAAAACCAGAGTCTGCCTACTTTCTGCTTTGTGCTTTCACCTACACCTCTGACTTTACGGGGGGCTGTCCCCCACTACCTCTCTGAAAAAAGAGTTAGCTTACAGCTCCAGTTAATAATTCCTGGGTGTGACAGTGTTTAACCTACAAACTCCTTTGGAAATCCTCTAGCCTGCCTGAATAGGTTTTTCCGGCCACATGTGATTGTTCAGAGCCTCCCAACTGTGAGAGGCAGGAGATGTTCTAAACTGTGTAAACACAGATTCTTTTGAATAGTTAA…	T	intergenic	gene-MIR2285M-5(dist=1505521),gene-LINGO2(dist=159576)
8	16641590	16641590	A	AAGCTGAGTGTTGGGGGCCAGAGTGAGGTACTCCGCCCGTGACAAAGGTCATGAGGAAGGAGGCTCGACATACGCAAAGGCGGGATCGAGCCTCAGGAGTCCCCCTGGAACTCCTCGAGCATCTACCCCCATAACCAGAGCCTGCCTACTTTACTACTTTGTGCTCACCTACACCTCTGACTTTACGGGGGGCTGTCCCCCACCACCTCTTTTGGAGAAGGAGTTAACTTAGAGCTCCAGTTTATAATAATTCCTGGGCGTGATAAGAGTGTTTTAACCTACAAACTCCTCTGAAGGTTCTCTAGCCTGCCTGACAGGCTCGTCCGGCCACATGTGATTGCTCACAGCCTCCCAACCGTGAGAGGCACAAGATGCTTTAAACCCTCTAAAAACGGGTTC…	intergenic	gene-LINGO2(dist=335507),gene-C8H9orf72(dist=58440)
8	18295644	18296870	TCTTTGTTGCCGGGAGCCGGCATATTGCATATTGAGTGCATATTGCATATTGAGTGCAGCACTTTTCAGGATCTGGAATAGCTCAACTGGAATTCTATCACTGCCGGTAGCCAGCGTGAGGAACTCCGCCCATGACAAAGGTCATGAGGAAGGAGGCTCGGCATACGCAAAGGCAGGATCGAGCTTCAGGAGTCCCCCTGGAAATTCTCGAGCATATACCCCCAAAACCAGAATCTGCCTACTTTCTGCTTTGTGCTTTCACCTACACCTCTGACTTTACGGGGGGCTGTCCCCCACTACCTCTCTGAAAAAAGTTAGCTTACAGCTCCAGTTAATAATTCCTGGGTGTGACAGTGTTTAACCTACAAACTCCTTTGGAAATCCTCTAGCCTGCCTGAA…	T	intergenic	gene-LOC101904667(dist=860298),gene-TUSC1(dist=279425)
8	21568419	21568419	T	TAACATTTGCTGGGGACCAGCCCCAGCTGATCCAGGGTATTCGAAGGAGAGACGGCCTAGGCGACTATTTATATGCTAATTAGAGATATAGAGAACAATAGAATGAGGATAGCTCAGTAGGAAAATTCAGTGGAGAAAAGAAGCTGAGTAGCTTGGTTTACGCGGGAGACCAATAAAACTTCAAGACAAGAAGTTTGCACCACTTACGTAGGCCGCAGGCGCCCTCTCGAATAGCGGAAGGTGTCTCACCCTAGACTCCTTCTCGAGTGGGTCTTAGAAGCCCAGGCATGATTAGTAAGCGTGGTGGGTTCCGCGCTCCAGATGGAGACTCAGCTGGAAGTTAAAGGGAAGAATGACATGGGGAGACCAAGCGCTGGTAAACAAGGCCCGTAGCTTTAT…	intergenic	gene-TRNAC-GCA-100(dist=1120624),gene-DMRTA1(dist=161836)
8	21649112	21649112	T	TACTGTGCTGGGGACCTGCCCCAGCTGATCCAGGGTATTCGAAGGAGAGACGGCCTAGGCGACTATTTATATGCTAATTAGAGATATAGAGAACAATAGAATGAGGATAGCTCAGTAGGAAAATTCAGTGGAGAAAAGAAGCTGAGTAGCTTGGTTTACGCGGGAGACCAATAAAACTTCAAGACAAGAAGTTTGCACCACTGACGTAGGCCGCAGGCGCCCTCTCGAATAGCGGAAGGTGTCTCACCCTAGACACCTTCTCGAGTGGGTCTTAGAAGCCCAGGCATGATTAGTCAGCGTGGTGGGTTCCGCGCTCCAGATGGAGACTCAGCTGGAAGTTAAAAGAAAGAATGACATGGGGAGACCAAGCGTTGGTGAGCAAGGCCCGTAGCTTTATTT…	intergenic	gene-TRNAC-GCA-100(dist=1201317),gene-DMRTA1(dist=81143)
8	21766943	21766943	G	GATTGGGAAGATCCCCTGGAGAAGGAAATTGCGGGGAGCCGGTGAGGCATTCCACTCGTGACAAAGGTCATGAGGAAGGAGGCTCGGCATACGCAAAGGCGGGATCGAGCCTCAGGAGTCCCCCCGGATATTCTCGAGCATTTTCCCCCAAAAAACCAGAGTCTGCCTACTTTATTGCTTTGTGCTCTCACCTCTGACTTTACTGGGGGCTGTCCCCTACCACCATCTCTCTCTCTGTCAAAGAGTTAACTTACAGCTCCAATTAATAAAGTTCCTGGGCAATTAGGAGTGTTTAAATCCAAACCCCTCTGATGGCTCTCTAACTCGCCTGACAAGTTTACCCGGACTCCTGCAGCTATGCATACGATTGTTTACAGTCTCCCAGGAGAGGCATGGGAA…	intergenic	gene-DMRTA1(dist=31734),gene-LOC782525(dist=104170)
8	26848312	26848312	T	TGGGAAGTGCCGGGGACCAGCCCCGGCTGATCCAGGGTATTCGAAGGAGAGACGGCATAGGCGAGGATCAGGATACGATAGTTTCAATTAGATATTAATTAGAGATATAAAGAGTAATAGAATAAGGATAGCTCAGTAGGAAAATTCAGTGGAGAAAAGAGGCTGAGTAGCTTGGTTTACGCGGGAGACCAATAAAACTTCAAGACAAGAAGTTTGCACCACTTACGTAGGCCGCAGGCGTCCTTCCATTCTCCCGAAGGAGAGGAGACACTGAGGCCTCCCCGGTCGGATCTTAGAAGCCCAGGCATAATTAGTAAGCATGGTGGGTTCCGCGCTCCAGATGGAGACTCAGCCAGAGGGAGAGAGAGACATGGGGAGACCAGTATTTCAAGAAACTGA…	intergenic	gene-SH3GL2(dist=22598),gene-CNTLN(dist=45349)
8	32575358	32576648	CTGCCGGGAGCCGGCAAGAGACATTCCACTCGTGACAAAGGTCATGAGGAAGGAGGCTCGGCATACGCAAAGGCGGGATCGAGTCTCAGGAGTCCCCCTGGATATTCTTGAGCATCTACCCCCAAAAACCAGAGTTTGCCTACTTTATTGCTTTGTGCTCTCACCTCTGACTTTACTGGGGGCTGTCCCCCACCACCATCTCATTCTCTCTGTCAAAGAGTTAACTTACAGCTCCAATTAATGAAGTTCCTGGGCAATTAGGAATGTTTAAATCCAAACCCCTCAGATAGCTCTCTAACTCACCTGACAAGTTTACCCGGACTCCTACAGCTATGCATACAATTGTTTACAGTCTCCCAGCCTTGAGAGGCACGGGAAGCTTAAGATATTCAAATAGCT…	C	intergenic	gene-TYRP1(dist=927040),NONE(dist=NONE)
8	35648974	35651385	CAAGGGGTGCGGGGAGCGAGCTCCGCCTCTGGCAAAGGTCATGAGGAAGGAGGCTTGGCATACACAAAGGCGGGATCAAGCCTCAGGAGTCTCCCTGGAAATTCTCGAGCAATCTACCCCCAAAACCAGAGTCTGCCTACTTTCTGCTTTGTGCTTTCACCTACACCTCTGACTTTACGGGGGGCTGTCCCCCACTACCTCTCTGAAAAAAGAGTTAGCTTATAGCTCCAGTTAATAATTCCTGGGTGTGACAGTGTTTCAACCTACAAACTCCCTTGGAAGTCCTCTAGCCTGCCTGAATAGGTTTTTCCGGCCACATGTGATTGCTCAGAGCCTCCAAACTGTGAGAGGCATGAGATGTTCTAAACTGTCTAAATACAGATTCCTTTGAGCAGTCAA…	C	intergenic	NONE(dist=NONE),gene-PTPRD(dist=377262)
8	45417612	45418916	GAACTATCTGCCGAGGTCGGTCCAGCTCCGGCTGATCCAGGGTATTCGAAGGGAAGACGGAGTCGGCGACTATTTACATATTTATCAAAGATATAAAGAGTAATAGAATGAGGATAGCTCAGTAGGAAAATTCGGTGGAGAAAAGAGGCTGAGTAGCTTGGTTTACGTGGGAGACCAATAAAACTTCAAGACAAGAAGTTTGCACCACTTACGTAGGCCGCAGGCGCCCTCTCGAATAGCGGAAGGTGCCTCACCCTAGACACCTTCTCGAGTGGGTCTTAGAAGCCCAGGCATAATTAGTAAGCATGGTGGGTTCCGCGCTCCAGATGGAGACTCAGCTGGAAGTTAAAGGGAAGAATGACATGGGGAGACCAAGCGTTGGTGAGCAAGGCCCGTAGC…	G	intergenic	gene-TJP2(dist=4435),gene-FAM189A2(dist=36862)
8	45545983	45547204	CTGCTGGGGACCAGCCCCGGCTGAACCAGGGTATTCGAAGGAGAGACGGCGTAGGCGAAGATCAGGAAACAATTGCTTAATTAAACGTTAATTAAGGATATAAAGAGTAATAGAATGAGGATAGCTCAGTAGGAAAATTCAGTGGAGAAAAGAGGCTGAGATAAGGATAGCTCAGTGAGGAAATTCAGTGTAGAAAAGAGGCTGAATAATTCAGCCAGAAGGTAAGAGAAAGAACGACATGGTGAGACCAAGTTTCGGTGAACAAGGCCCGTACTTTATTTTCCAAAGTAGTTTTTATACCTTAAGTTATGCATAGAGGATAATGGGGGAAGGGGTAGAGTCAGGCAGCAAGCCAGGCTTTCTTCCTGCAAACTTATCATATGCAAAAGCTTAGGTGAT…	C	intergenic	gene-FAM189A2(dist=13514),gene-APBA1(dist=29422)
8	48733263	48734560	CCTCACCTGCGGGGAGCCGGTGAGGCATTCCACTCGTGACAAAGGTCATGAGGAAGGAGGCTCGGCATACGCAAAGGCGGGATCGAGCCTCAGGAGTCCCCCCGGATATTCTCGAGCATTTTCCCCCAAAAAACCAGAGTCTGCCTACTTTATTGCTTTGTGCTCTCACCTCTGACTTTACTGGGGGCTGTCCCCTACCACCATCTCGCTCTCTCTCTGTCAAAGAGTTAACTTACAGCTCCAATTAATAAAGTTCCTGGGCAATTAGGAGTGTTTAAATCCAAACCCCTCTGATGGCTCTCTAACTCGCCTGACAAGTTTACCCGGACTCCTGCAGCTATGCATACGATTGTTTACAGTCTCCCAGCCTCGAGAGGCATGGGAAGCTTAAGATATTCA…	C	intergenic	gene-LOC783838(dist=81883),gene-TMC1(dist=155945)
8	48733758	48733808	CCCTGAATTGTATCCTTGAATATGTATCAATTAATAGTGGGTATGTAGAAA	C	intergenic	gene-LOC783838(dist=82378),gene-TMC1(dist=156697)
8	56221692	56230478	AAGTCAACTGCCGGGGACCAGCCCCGGCTGAACCAGGGTATTCGAAGGAGAGACGGCGTAGGCGAAGATCAGGAAACAATTGCTTAATTAAATGTTAATTAAGGATATAAAGAGTAATAGAATGAGGATAGCTCAGTAAAATTCAGTGAAGAAAAGAGGCTGAAATAAGGATAGCTCAGTGAGGAAATTCAGTGGAGAAAAGAGGCTGAATAATTCAGCCAGAAGGTAAGAGAAAGAATGACATGGTGAGACCAAGTTTCGGTGAACAAGGCCCGCACTTTATTTTTCAAAGTAGTTTTTATACCTTAAGTTATGCACAGAGGATAATGGGGGAAGGGGTAGAGTCTTGCAGCAAACCAGGCTTTCTTCCTGCAAACTTATCATATGCAAAAGCTTAGG…	A	intergenic	gene-TLE4(dist=490526),gene-LOC112447807(dist=61086)
8	60456989	60456989	G	GGACTGCTGTTGGGGGCCAGAGTGAGGTACTCCGCCCGTGACAAAGGTCATGAGGAAGGAGGCTCGACATACGCAAAGGCGGGATCGAGCCTCAGGAGTCCCCCTGGAACTCCTCGAGCATCTACCCCCATAACCAGAGCCTGCCTACTTTACTACTTTGTGCTCACCTACACCTCTGACTTTACGGGGGGCTGTCCCCCACCACCTCTTTTGGAGAAGGAGTTAACTTAGAGCTCCAGTTTATAATAATTCCTGGGCGTGATAAGAGTGTTTTAACCTACAAACTCCTCTGAAGGTTCTCTAGCCTGCCTGACAGGCTCGTCCGGCCACATGTGATTGCTCACAGCCTCCCAACCGTGAGAGGCACAAGATGCTTTAAACCCTCTAAAAACGGGTTCT…	intergenic	gene-CCIN(dist=8735),gene-CLTA(dist=16876)
8	62483447	62483922	GGGCCTTTGCCGGAGCCAGCCGGCAAAGTCGATCAGGTCCCGAGAACGTGCACGGCGGGGCTAAGAAAGAAACTAAAGCAAGAGACTACAAAGATGGGGTCGAGAGGTTCAGACATGTCACCACGAAGGGACGCAGTCTGACACCAACTTTTTTCAACATCTCGTATTTATACAGAAAAGCGCGAGAAAGACAAGACAGTTGACATTTTTTCTTGGTTGGCCTATACATCTTACAGTCACAAGAAATCTTGAGAGCATGGGAATGGCTCCCTGTTATTATTTCTTACACCAGATAACATTTCTCTGTGCATGAGAAGTTTGCACAGAGCTCCAGGTGCCTGCAGTAAATAAGCGCCTAATCTCTGGGGTGGCGGGACAGAGAGCTATGTTTGCAAGCAA…	G	intronic	gene-LOC507550
8	65985154	65985154	C	CATTTTCTGCCGGGGACCAGCCCTGGCTGATCCAGGGTACTCGAAGGAGAGACGGCATAGGCGAGGGTCAGGATACGATAGTTTCAATTAGATATTAATTAGAGATATAAAGAGTAATAGAATAAGGATAGCTCAGTAGGAAAATTCAGTGGAGAAAAGAGGCTGAGTAGCTTGGTTTACGCGGGGGACCAATAAAACTTCAAGACAAGAAGCTTGCACCACTTACGTAGGCCGCAGGCGTCCTTCTGTTCTCCCGAAGGAGAGGAGACACTGAGGCCTCCCCGGTCGGATCTTAGAAGCCCAGGCAAAATTAGTAAGCTTGGTGGGTTCCGCGCTCCAGATGGAGACTCAGCCAGAGGGAGAGAGAGACATGGGGAGACCAGTATTTTGAGAAACTGA…	intronic	gene-CNTNAP3
8	66306837	66306837	G	GGATTGGTGCCGGGGACCAGCCCCGGCTGATCCAGGGTATTCGAAGGAGAGACGGCATAGGCGAGGATCAGGATACAATAGCTTCAATTAGATATTAATTAAAGATATAAAGAGTAATAGAATAAGGATAGCTCAGTAGGAAAATTCAGTGGAGAAAAGAGGCTGAGTAGCTTGGTTTACGCGGGAGACCAATAAAACTTCAAGACAAGAAGTTTGCACCACTTACGTAGGCCGCAGGCATCCTTCCGTTCTCCCGAAGGAGAGGAGACACTGAGGCCTCCCCGGTCGGATCTTAGAAGCCCAGGCATAATTAGTAAGCATGGTGGGTTCTGCGCTCCAGATGGAGACTCAGCCAGAGTGAGAGAGAGACATGGGGAGACCAGTATTTCGAGAAACTGA…	intergenic	gene-CNTNAP3(dist=165007),gene-LOC112447816(dist=468924)
8	68645442	68646744	CATCAAATGTTGGGGGCCAGAGTGAGGTACTCCGCCCGTGACAAAGGTCATGAGGAAGGAGGCTCGACATACGCAAAGGCGGGATCGAGCCTCAGGAGTCCCCCTGGAAATCCCCGAGCGTCTACCCCCATAACCAGAGCCTGCCTACTTTACTACTTTGTGCTCACCTACACCTCTGACTTTACGGGGGGCTGTCCCCCACCACCTCTTTTGGAGAAGGAGTTAACTTAGAGCTCCAGTTTATAATAATTCCTGGGCGTGATAAGAGTGTTTTAACCTACAAACTCCTCTGAAGGTTCTCTAGCCTGCCTGACAGGCTTGTCCGGCCACATGTGATTGCTCACAGCCTCCCAACCGTGAGAGGCACAAGATGCTTTAAACCCTCTAAAAACAGGTTCT…	C	intergenic	gene-LOC112447755(dist=136223),gene-TRNAC-GCA-107(dist=309538)
8	68944040	68945344	GGTCCAGTGCCGGGGACCAGCCCCGGCTGATCCAGGGTATTCGAAGGAGAGACGGCATAGGCGAGGATCAGGATACAATAGCTTCAATTAGATATTAATTAAAGATATAAAGAGTAATAGAATAAGGATAGCTCAGTAGGAAAATTCAGTGGAGAAAAGAGGCTGAGTAGCTTGGTTTACGCGGGAGACCAATAAAACTTCAAGACAAGAAGTTTGCACCACTTACGTAGGCCGCAGGCGTCCTTCCGTTCTCCCGAAGGAGAGGAGACACTGAGGCCTCCCCGGTCGGACCTTAGAAGCCCAGGCATAATTAGTAAGCATGGTGGGTTCCGCGCTCCAGATGGAGACTCAGCCAGAGTGAGAGAGAGAGCGACATGGGGAGACCAGTATTTCGAGAAA…	G	intergenic	gene-LOC112447755(dist=434821),gene-TRNAC-GCA-107(dist=10938)
8	71778915	71787683	GGACTGGTGTTGGGGGCCAGAGTGAGGTACTCCGCCCGTGACAAAGGTCATGAGGAAGGAGGCTCGACATACGCAAAGGCGGGATCGAGCCTCAGGAGTCCCCCTGGAACTCCTCGAGCATCTACCCCCATAACCAGAGCCTGCCTACTTTACTACTTTGTGCTCACCTACACCTCTGACTTTACGGGGGGCTGTCCCCCACCACCTCTTTTGGAGAAGGAGTTAACTTAGAGCTCCAGTTTATAATAATTCCTGGGCGTGATAAGAGTGTTTTAACCTACAAACTCCTCTGAAGGTTCTCTAGCCTGCCTGACAGGCTCGTCCGGCCACATGTGATTGCTCACAGCCTCCCAACCGTGAGAGGCACAAGATGCTTTAAACCCTCTAAAAACGGGTTCT…	G	intergenic	gene-ADAM7(dist=72878),gene-NEFM(dist=393525)
8	80604516	80604641	CTTTAGCCCTGTCCTAACTTATAGCAATATAAGGTATGAAGACCGTACAGAATATGGAGTTATAATCTTCTGCCGGGGACCAGCCCCGGCTGATCCAGGGTATTCGAAGGAGAAACGGCGTAGGTG	CAA	intergenic	gene-GAS1(dist=472046),gene-DAPK1(dist=106399)
8	80604578	80605871	TAATCTTCTGCCGGGGACCAGCCCCGGCTGATCCAGGGTATTCGAAGGAGAAACGGCGTAGGTGAAGATCAGGATACAATAGCTTCAATTAGATATTAATTAAAGATATAAAGAGTAATAGAATAAGGATAGCTCAGTAGGAAAATTCAGTGGAGAAAAGAGGCTGAGTAGCTTGGTTTACGCGGGAGACCAATAAAACTTCAAGACAAGAAGTTTGCACCACTTATGTAGGCCGCAGGCGTCCTTCCATTCTCCCGAAGGAGAGGAGACACTGAGGCCTCCCCGGTCGGATCTTAGAAGCCCAGGCATAATTAGTAAGCATGGTGGGTTCCGCGCTCCAGATGGAGACTCAACCAGAGTGAGAGAGCGAGCGACATGGGGAGACCAGTATTTCGAGAA…	T	intergenic	gene-GAS1(dist=472108),gene-DAPK1(dist=105169)
8	80947719	80947719	T	TGTTCGGGGAGCGAGCTCCGCCTCTGGCAAAGGTCATGAGGAAGGAGGCTTGGCATACGCAAAGGCGGGATCAAGCCTCAGGACTCTCCCTGGAAATTCTCGAGCAATCTACTCCCAAAACCAGAGTCTGCCTACTTTCTGCTTTGTGCTTTCACCTACACCTCTGACTTTACGGGGGGCTGTCCCCCACGACCTCTCTGAAAAAAGAGTTAGCTTACAGCTCCAGTTAATAATTCCTGGGTGTGACAGTGTTTAACCTACAAACTCCTTTGGAAATCCTCTAGCCTGCCTGAATAGGTTTTTCCGGCCACATGTGATTGTTCAGAGCCTCCCAACTGTGAGAGGCAGGAGATGTTCTAAACTGTCTAAACACAGATTCTTTTGAGTAGTTAAAAGATT…	intergenic	gene-DAPK1(dist=25973),gene-CTSL(dist=26850)
8	81822653	81823952	TGTTACCTGCCGGGACCCGGTGAGGCATTCCACTCGTGACAAAGGTCATGAGGAAGGAGGCTCAGCATACGCAAAGGCGGGATCGAGCCTCAGGAGTCCGCCCGGATATTCTCGAGCATCTACCCCCCAAAAAAACCAGAGTCTGCCTACTTTATTGCTTTGTGCTCTCACCTCTGACTTTACTGGGGGCTGTCCCCTACCACCATCTCTCTCTCTCTGTCAAAGAGTTAACTTACAGCTCCAATTAATAAAGTTCCTGGGCAATTAGGAGTGTTTAAATCCAAACCCCTCAGATGGCTCTCTAACTCACCTGACAAGTTTACCCGGACTCCTACAGCTATGCATACGATTGTTTACAGTCTCCCAGCCTCGAGAGGCACAGGAAGCTTAAGATATTCA…	T	intronic	gene-FANCC
8	83743787	83743787	G	GTGTTGGGGGCCGGAGTGAGGTATTCCGCCCGTGACAAAGGTCATGAGGAAGGAGGCTCGACATACGCAAAGGCGGGATCGAGCCTCAGGAGTCCCCCTGGAACTCCTCGAGCATCTACCCCCATAACCAGAGCCTGCCTACTTTACTACTTTGTGCTCTCACCTACATCTCTGACTTTACGGGGGGCTGTCCCCCACCACCTCTTTTGGAGAAGGAGTTAACCTAGAGCTCCAGTTAATAATAATTCCTGGGCGTGATAAGAGTGTTTTAACCTACAAACTCCTCTGAAGGTTCTCTAGCCTGCCTGACAGGCTCGTCCGGCCACATGTGATTGCTCACAGCCTCCCAACCGTGAGAGGCACGAGATGCTTTAAACCCTCTAAAAACAGGTTCTTTAG…	intergenic	gene-LOC112447830(dist=13233),gene-ZNF484(dist=48675)
8	83743794	83743794	A	ATGGTTTCTGAAGTTAAAAGGCCAAAGAAAAGCCTGATCTTTTTAAAAGCTAAAAGCTTTATCTTCTATTATACTTAATTTTCTGACACGGGTAACACTGAAACTAAGAATGGCAACTCTTTATACAGTAATCTTGAAACTGTTAAAGAGGCTACTGTTAATTTAGATACTTGGGTGAAGGTAAAAAACAACTAAAAATTTATCCTATAAATATGATTAAAAATGTTCTGGACCCTCATCATGAGGCTGTGGGATAGCCTATGGGAGAGGCTATAGCGGTGGATGGTAGTGGGTCTCCACCTTCTGCGCAGATCATATTTTCTGCCATTGACTAGGAAAAGGAGGGACACTGTGCTCTACCTCCCGAGGAGTGAGAGGGCTTACAGGACGCTGCGGCCG…	intergenic	gene-LOC112447830(dist=13240),gene-ZNF484(dist=48668)
8	86945798	86945798	G	GGACATCTGCCCCTTTGTCACAAGTGGAATGTCTGTCGCCGGCTCCCGGCA	intergenic	gene-AUH(dist=259104),gene-SYK(dist=29907)
8	87345450	87345759	CGACCCATGCATCTGCCAGAGACTTCTGGACACTCATAGGCAAGTCTGGGTCAGTCTCTTTTGCGGTCACTGCTCCTTTCTCCTGGGTCCTTGTGCTCACAAACACTTCTGTTTGTGAGCACATGGTTCTGTTTGATCACTCACCTAGAGACAAACATCCTGGAATGTGATGTCAAGTGTGCCTTAGGAAGCATCATTATCAACAGAGCTAGTAGAGGTAATGGAATTCCAGTTGAGCTATTTCAAATCCTAAAAGATGATGCACACACTGCTGCACTCAGTGCCCCCGACTCTGTAACAGGCCACTGCT	C	intergenic	gene-DIRAS2(dist=82588),gene-GADD45G(dist=1162260)
8	93250936	93250936	G	GAGGTTAGTGCCGGGGTCCTGCCCCGGCTGATCCAGGGTATTCGAAGCGGGGACGGCGTCGGCGACCTATTTATTTAAATATTTTATCAAAGATATAAAGAGTAATAGGATGAGGATAGCTCAGTAGGAAAATTCAGTGGAGAAAAGAGGCTGAGTAGCTTGGTTTACGCGGGAGACCAATAAAACTTCAAGACAAGAAGTTTGCACCACTTACGTAGGCCGCAGGCGTCCTTCCGTTCTCCCGAAGGAAAGGAGACACTGAGGCCTCCCCGGTCGGATCTTAGAAGCCCAGGCATAATTAGTAAGCATGGTGGGTTCCGCGCTCCAGATGGAGATTCAACCAGAGTGAGAGAGAGAGCGACATGGGGAGACCAGTATTTCGAGAAACTGATCCCAATT…	intergenic	gene-CYLC2(dist=677721),gene-SMC2(dist=454404)
8	97716052	97716052	T	TAGCCACCTGCGGGGAGCGAGCTCCGCCTCTGGCAAAGGTCATGAGGAAGGAGGCTTGGCATACGCAAAGGCGGGATCAAGCCTCAGGAGTCTCCCTGGAAATTCTCGAGCAATCTACCCCCAAAACCAGAGTCTGTCTACTTTCTGCTTTGTGCTTTCACCTACACCTCTGACTTTACGGGGGGCTGTCCCCCACTACCTCTCTGAAAAAAGAGTTAGCTTATAGCTCCAGTTAATAATTCCTGGGTGTGACAGTGTTTCAACCTACAAACTCCCTTGGAAGTCCTCTAGCCTGCCTGAATAGGTTTTTCCGGCCACATGTGATTGCTCAGAGCCTCCAAACTGTGAGAGGCATGAGATGTTCTAAACTGTCTAAATACAGATTCCTTTGAGCAGTCA…	intergenic	gene-KLF4(dist=536912),gene-TRNAE-UUC-44(dist=370738)
8	99544756	99544756	G	GAGAGCGTGCCGGAGCCAGCCGGCAAAGTCGATCAGGTCCCGAGAACGTGCACAGCGGAGCTAAGAAAGAAACTAAAGCAAGAGACTACAAAGATGGGGTCGAGAGGTTCAGACACGTCACCACGAAGGGACGCAGTCTGACACCAACTTTATTCAACATCTCATATTTATACAGAAAAGCGTGAGAGAGACGAAACAGTTGACATTTTTTCTTGGTTAGCCTATACATCTTACAAACAGTCACAAGAAATCTTGAGAGCATGGGAATGGCTCCCTGTTATTATTTCTTACACCAGATAACATTTCTCTGTGCGTGAGAAGTTTGCACAGAACTCCAGGTGCCTGCAGTAAATAAGCGCCTAATCTCTGGGGTGGCGGGACAGAGAGCTATGTTTGCAA…	intergenic	gene-PALM2(dist=41731),gene-AKAP2(dist=132372)
8	102000000	102269710	CTGCCGGGAGCCGGTGAGGCATTCTGCTCACGACAAAGGTCATGAGGAAGGAGGCTCGGCATACGCAAAGGCGGGATCGAGCCTCAGGAGTCCCCCCAGATATTCTCGAGCATTTTTCCCCAAAAAACCAGAGTCTGCCTACTTTATTGCTTTGTGCTCTCACCTCTGACTTTACTGGGGGCTGTCCCCCACCACCATCTCGCTCTCTCTCTGTCAAAGAGTTAACTTACAGCTCCAATTAATAAAGTTCCTGGGCAATTAGGAGTGTTTAAATCCAAACCCCTCAGATGGCTCTCTAACTCGCCTGACAAGTTTACCCGGACTCCTGCAGCTATGCATACGATTGTTTACAGTCTCCTAGCCTCCAGAGGCACGGGAAGCTTAAGATATTCAAATAGC…	C	intronic	gene-ZNF883
9	1386730	1386730	C	CATTAAGTGCCGGGGACCAGCCCCGGCTGATCCAGGGTATTCGAAGGAGAGACGGCATAGGCGAGGATCAGGATACGATAGCTTCAATTAGGTATTAATTAAAGATATAAAGAGTAATAGAATAAGGATAGCTCAGTAGGAAAATTCAGTGGAGAAAAGAGGCTGAGTAGCTTGGTTTACGCGGGAGACCAATAAAACTTCAAGACAAGAAGTTTGCACCACTTACGTAGGCCGCAGGCGTCCTTCCGTTCTCCCGAAGGAGAGGAGACACTGAGGCCTCCCCGGTCGGATCTTAGAAGCCCAGGCATAATTAGTAAGCATGGTGGGTTCCGCGCTCCAGATGGAGACTCAACCAGAGTGAGAGAGAGAGCGACATGGGGAGACCAGTATTTCGAGAAA…	intergenic	gene-PHF3(dist=717531),NONE(dist=NONE)
9	4059004	4060308	CTTACTTTGTTGGGGGCCAGAGTGAGGTACTCCGCCCATGGCAAAGGTCATGAGGAAGGAGGCTCGACATACGCAAAGGCGGGATGGAGCCTCAGGAGTCCCCCTGGAAATCCTCGAGCGTCTACCCCCATAACCAGAGCCTGCCTACTTTACTACTTTGTGCTCTTACCTACACCTCTGACTTTACGGGGGGCTGTCCCCCACCACCTCTTTCGGAGAAGGAGTTAACCTAGAGCTCCAGTCAATAAAAACTCTTGGGTGTGACAAGAGTGTTTTGACCTACAAACTCCTCTGAAGGTTCTCTAGCCTGCCTGACAGGCTCGTCCGGCCACATGTGATTCCTCACAGCCTCCCAACTGTGAGAGGCACGAGATGCTTTAAACCTTCTAAAAACAGGTT…	C	intergenic	NONE(dist=NONE),NONE(dist=NONE)
9	6876057	6877227	TACCAATGTGCGGGGAGCGAGCTCCGCCTCTGGCAAAGGTCATGAGGAAGGAGGCTTGGCATACGCAAAGGCGGGATCAAGCCTCAGGAGTCTCCCTGGAAATTCTCGAGCAATCTACCCCCAAAACCAGAGTCTGCCTACTTTCTGCTTTGTGCTTTCACCTACACCTCTGACTTTACGGGGGGCTGTCCCCCACTACCTCTCTGAAAAAAGTTAGCTTACAGCTCCAGTTAATAATTCCTGGGTGTGACAGTGTTTAACCTACAAACTCCTTTGGAAATCCTCTAGCCTGCCTGAATAGGTTTTTCCGGCCACATGTGATTGCTCAGAGCCTCCCAACTGTGAGAGGCAGGAGATGTTCTAAACTGTGTAAACACAGATTCTTTTGAATAGTTAAAA…	T	intergenic	NONE(dist=NONE),gene-ADGRB3(dist=483294)
9	12669295	12670572	CATATAGTGCCGGGGTCCAGCCCCGGCTGATCCAGGGTATTCGAAGCGGGAACGGCGTCGGCGACCTATTTATTTAAATATTTTATCAAAGATATAAAGAGTAATAGGATGAGGATAGCTCAGTAGAAAAATTCAGTGGAGAAAAGAGGCTGAGTAGCTTGGTTTACGCGGGAGACCAATAAAACTTCAAGACAAGAAGTTTGCACCATTTACGTAGGCCACAGGCGTCCTTCCGTTCTCCCGAAGGAGAGGAGACACTGAGGCCTCCCTGGTCGGATCTTAGAAGCCCAGGCATAATTAGTAAGCATGGTGGGTTCCGCGCTCCAGATGGAGACTCAACCAGAGTGAGAGAGAGAGCGACATGGGAAGACCAGTATTTCGAGAAACTGATTCCAATTC…	C	intergenic	gene-KHDC1L(dist=11999),gene-LOC104972957(dist=58651)
9	19110689	19111973	GAATGAGTGTTGGGGGCCAGAGTGAGGTACTCTGCCCATGGCAAAGGTCATGAGGAAGGAGGCTCGACATACGCAAAGGCGGGATCGAGCCTCAGGAGTCCCCCTGGAAATCCTCAAGCGTCTACCCCCATAACCAGAGCCTGCCTACTTTACTACTTTGTGCTCTTACCTACACCTCTGACTTTACGGGGGGCTGTCCCCCACCACCTCTTTCGGAGAAGGAGTTAACCTAGAGCTCCAGTCAATAAAAACTCTTGGGTGTGACAAGAGTGTTTTAACCTACAAACTCCTCTGAAGGTTCTCTGGCCTGCCTGACAGGCTTGTCCGGCCACATGTGATCGCTCACAGCCTCCCAACCGTGAGAGGCACAAGATGCTTTAAACCCTCTAAAAACAGGTT…	G	intronic	gene-LCA5
9	19484973	19484973	C	CGGCTACTGCCGAGGACCAGCCCCAGCTGATCCAGGGTATTGGAAGGGGAGACGGCGTCGGCGACCTATTCAAATGGTAATTAGAGATATAAAGAGTAATAGAATGAGGATAGCTCAGTAGGAAAATTCAGTGGAGAAAAGAGGCTGAGTAGCTTGGTTTACGCGGAAAATCAATATAACCCGTGACACCAGGTTAGCTCTGACCACGGAGGCCGCAGGCGCCCTCTCAAATAGCGGAAGGTGCCCCACCTTAGACACCTTCTCGAGTGGGTCTTAGAAGCCCAGGCAAATAAGTGGTCGCAGAGGATATCCATGCTCCAGATGGAGACTTCAGCCGGAAGTTAAAGGAAAGAATTGACATGGGGAGACCAAGCATTGGTGAGCAAGGCCCGTAGCTTT…	intergenic	gene-SH3BGRL2(dist=154352),gene-ELOVL4(dist=117159)
9	20190051	20191348	TAACTCTTTGCCGGGGACCAGCCCCAGCTGATCCAGGGTATTCGAAGGAGAGAAGGCCTAGGCGACTATTTATATGCTAATTAGAGATATAGAGAACAATAGAATGAGGATAGCTCAGTAGGAAAATTCAGTGGAGAAAAGAAGCTGAGTAGCTTGGTTTACGCGGGAGACCAATAAAACTTCAAGACAAGAAGTTTGCACCACTTACGTAGGCCGCAGGCGCCCTCTCGAATAGCGGAAGGTGTCTCACCCTAGACTCCTTCTCGAGTGGGTCTTAGAAGCCCAGGCATAATTGGTAAGCGTGGTGGGTTCCGCGCTCCAGATGGAGACTCAGCTGGAAGTTAAAAGAAAGAATGACATGGGGAGACCAAGCGTTGGTGAGCAAGGCCCGTAGCTTTA…	T	intergenic	gene-BCKDHB(dist=115296),gene-FAM46A(dist=1306469)
9	21942266	21942266	G	GGAACATTGCGGGGAGCTGCCCGTGAGAACGGGGTCCTTTGTCCGAAGGACACAGCTCTGGAGCTGCCTCAGTCCTTGAGGGTTTGCTTGCAAACATAGCTCTCTGTCCCGCCACCCCAGAGATTAGGCGCTTATTTACTGCAGGCACCTGGAGTTCTGTGCAAACTTCTCACGCACAGAGAAATGTTATCTGGTGTAAGAAATAATAACAGGGAGCCATTCCCATGCTCTCAAGATTTCTTGTGACTGTTTGTAAGATGTATAGGCCAACCAAGAAAAAAAGTTAACTGTCTTTCTCACACTCTTCTGTATAAATATGAGATGCTGAATAAAGTTGGTGTCAGACTGCGTCCCTTCGTGGTGACGTGTCTGAACCTCTCGACCCCATCTTTGTAGTCT…	intergenic	gene-FAM46A(dist=437407),gene-TRNAG-CCC-64(dist=25964)
9	25819130	25819130	G	GAGTTCCTGCCGGGGACCAGCCCCGGCTGATCCAGGGTATTCGAAGGACAGACGGCATAGGCGAAGATCAGGAAACAATTGCTTAATTAAATGTTAATTAAAGATATAAAGAGTAATAGAATGAGGATAGCTCAGTAAAATTCAGTGAAGAAAAGAGGCTGAAATAAGGATAGCTCAGTGAGGAAATTCAGTGGAGAAAAGAGGCTGAATAATTCAGCCAGAAGGTAAGAGAAAGAACGACATGGTGAGACCAAGTTTCGGTGAACAAGGCCCCGCACTTCATTTTCCAAAGTAGTTTTTATACCTTAAGTTATGCATAGAGGATAATGGGGGAAGGGGAAGAGTCAGGCAGCAAGCCAGGCTTTCTTCCTGCAAACTTATCATATGCAAAAGCTTAGG…	intergenic	gene-HEY2(dist=258036),gene-TRNAC-GCA-112(dist=92077)
9	28351843	28351843	G	GGAAAAAGATCTCGGGCCTTGTTCACCGAAACATGGTCTCACCATGTCGTTCTTTCTCTTACCTTCTGGCTGAATTATTCAGCCTCTTTTCTACACTGAATTTCCTCACTGAGCTATCCTTATCTCAGCCTCTTTTCTCCACTGAATTTTCCTACTGAGCTATCCTCATTCTATTACTCTTTATATCCTTAATTAACGTTTAATTAAGCAATTGTTTCCTGATCTTCGCCTACGCCGTCTCTCCTTCGAATACCCTGGATCAGCCGGGGCTGGTCCCCAGCAGGTGGCGCCCGAACAGGGACTTTCGAAGGATGCAGATTCTCCAATTTAGATCCAGGACAGGTTGATTCGCCATGTTGCAGACCCCCAGACATCCAGTTCCCCCATTGCTTCGATCAC…	intergenic	gene-CLVS2(dist=12172),gene-SMPDL3A(dist=101714)
9	34070564	34071852	TACTGTGTGTTGGGGGTCAGAGTGAGGTACTCTGCCCATGACAAAGGTCATGAGGAAGGAGGCTCGACATACGCAAAGGTGGGATCGGGCCTCAGGAGTCCCCCTGGAAATCCTCAAGCATCTACCCCCATAACCAGAGCCTGCCTACTTTACTACTTTGTGCTCTCACCTACATCTCTGACTTTACGGGGGACTGTCCCCCACCACCTCTTTCGGAGAAGGAGTTAACCTAGAGCTCCAGTTAATAATAATTCCTGGGCGGGATAAGAGTGTTTTAACCTACAAACTCCTCTGAAGGTTCTCTAGCCTGCCTGACAGGCTTGTCCGGCCACATGTGATTGCTCACAGCCTCCCAACCGTGAGAGGCACGAGATGCTTTAAACCTTCTAAAAACAGGTT…	T	intergenic	gene-LOC100336222(dist=88350),gene-SULT1C4(dist=3359)
9	44465441	44466659	TGCTAATTGCCGGGGACCAGCCCCGGCTGAACCAGGGTATTCGAAGGAGAGACGGCGTAGGCGAAGATCAGGAAACAATTGCTTAATTAAATGTTAATTAAGGATATAAAGAGTAATAGAATGAGGATAGCTCAGTAAAATTCAGTGAAGAAAAGAGGCTGAAATAAGGATAGCTCAGTGAGGAAATTCAGTGGAGAAAAGAGGCTGAATAATTCAGCCAGAAGGTAAGAGAAAGAACGACATGGTGAGACCAAGTTTCGGTGAACAAGGCCCGCACTTTATTTTTCAAAGTAGTTTTTATACCTTAAGTTATGCACAGAGGATAATGGGGGAAGGGGTAGAGTCTTGCAGCAAACCAGGCTTTCTTCCTGCAAACTTATCATATGCAAAAGCTTAGGT…	T	intergenic	gene-PRDM1(dist=599239),gene-PREP(dist=109515)
9	46912338	46912338	A	AACTGCATTGCCGGGGACCAGCCCCGGCTGATCCAGGGTATTCGAAGGAGAGACGGCATAGGCGAGGATCAGGATACAATAGCTTCAATTAGATATTAATTAAAGATATAAAGAGTAATAGGATGAGGATAGCTCAGTAGGAAAATTCAGTGGAGAAAAGAGGCTGAGTGGCTTGGTTTACGCGGGAGACCAATAAAAAACTTCAAGACAAGAAGCTTGCACCACTTACGTAGGCCACAGGCGTCCTTCCATTCTCCCGAAGGAGAGGAGACACTGAGGCCGCCCCGGTCGGATCTTAGAAGCCCAGGCATAATTAGTAAGCATGGTGGGTTCCGCGCTCCAGATGGAGACTCAGCCAGAGTGAGAGAGAGAGCGACATGGGGAGACCAGTATTTTGAG…	intergenic	gene-TRNAM-CAU-7(dist=724322),gene-GRIK2(dist=975361)
9	52795057	52796071	GACCCACGAGCGTCTACCCCCATAACCAGAGCCTGCCTACTTTACTACTTTGTGCTCTTACCTACACCTCTGACTTTACAGGGGGCTGTCCCCCACCACCTCTTTCGGAGAAGGAGTTAATCTAGAGCTCCAGTTAATAATAATTCCTGAGCGTGATAAGAGTGTTTTAACCTACAAACTCCTCTGAAGGTTCTCTAGCCTGCCTGACAGGCTCCTCCGGCCACATGTGATTGCTCGCAGCCTCCCAACCGTGAGAGGCACAAGATGCTTTAAACCCTCTAAAAACAGGTTCTTTAGAGAAGTTAGAAAACTATAAGTATAAGTATAGTGGGCTAATTAGAAATTGTATTGGTGAAGGGTTTTTCATTTGTTGAGCCAATGTTTGTTGCTAAGTCTCCA…	G	intronic	gene-KLHL32
9	54404532	54404532	C	CCTGTACTGAGGGGAGCGAGCTCCGCCTCTGGCAAAGGTCATGAGGAAGGAGGCTTGGCATACGCAAAGGCGGGATCAAGCCTCAGGAGTCTCCCTGGAAATTCTCGAGCAATCTACCCCCAAAACCAGAGTCTGCCTACTTTCTGCTTTGTGCTTTCACCTACACCTCTGACTTTACGGGGGGCTGTCCCCCACGACCTCTCTGAAAAAAGAGTTAGCTTACAGCTCCAGTTAATAATTCCTGGGTGTGACAGTGTTTAACCTACAAACTCCTTTGGAAATCCTCTAGCCTGCCTGAATAGGTTTTTCCGGCCACATGTGATTGTTCAGAGCCTCCCAACTGTGAGAGGCATGAGATGTTCTAAACTGTCTAAATACAGATTCCTTTGAGCAGTTAAA…	intergenic	gene-MANEA(dist=25421),NONE(dist=NONE)
9	55539616	55540615	ACATAAGACTGCCGGGGTCCAGCCCCGGTGGATCCAGGGAATTCGAAGCGGGGACGGCGTCGGCGAGGATCAGGAAACAACTGCTTAATTAAACTTTAATTAAGGATATAAAGAGTAATGGAATAAGGATAGCTCAGTGAGGAAATTCAGTGAAGAAAAGAGGCTGAAATAAGGATAGCTCAGTGAGGAAATTCAGTGGAGAAAAGAGGCTGAATAATTCAGCCAGAAGGTAAGAGAAAGAACGACATGGTGAGACCAAGTTTCGGTGAACAGGCCCGCACTTTATTTTCCAAAGTAGTTTTTATACCTTAAGTTATGCATAGAGGATAATGGGGGAAGGGGTAGAGTCATGCAGTAAGCCAGGCTTTCTTCCTGCAAACTTACCATATGCAAAAGTTT…	A	intergenic	gene-MANEA(dist=1160505),gene-TRNAC-ACA-45(dist=1069373)
9	55873727	55873778	TAATAATTCCTGGGTGTGACAGTGTTTCAACCTACAAACTCCTTTGGAAATC	TG	intergenic	gene-MANEA(dist=1494616),gene-TRNAC-ACA-45(dist=736210)
9	55873946	55874001	GTTTGCTGCTAAGTCTCCATACTCCTTACCTACTGTGTCCTTGGCAGTGTATTGAT	GCAGG	intergenic	gene-MANEA(dist=1494835),gene-TRNAC-ACA-45(dist=735987)
9	58256205	58256205	T	TTTATATTGCCGGGGACCTGCCCCGGCTGATCCAGGGTATTCGAAGCGGGGACGGCGTCGGCGACCTATTTATTTAAATATTTTATCAAAGATATAAAGAGTAATAGGATGAGGATAGCTCAGTAGGAAAATTCAGTGGAGAAAAGAGGCTGAGTAGCTTGGTTTACGCGGGAGACCAATAAAACTTCAAGACAAGAAGTTTGCACCACTTACGTAGGCCGCAGGCGTCCTTCCGTTCTCCCGAAGGAGAGGAGACACTGAGGCCTCCCCGGTCGGATCTTAGAAGCCCAGGCATAATTAGTAAGCATGGTGGGTTCCGCGCTCCAGATGGAGACTCAACCAGAGTGAGAGAGAGAGCGACATGGGGAGACCAGTATTTCGAGAAACTGATCCCAATTC…	intergenic	gene-EPHA7(dist=1294215),gene-MAP3K7(dist=1423406)
9	58536601	58545710	TAGAAACCTGCCGGGGACCAGCCCCGGCTGATCCAGGGTATTCGAAGGAGAGACGGCATAGGCGAGGATCAGGATACGATAGCTTCAATTAGGTATTAATTAAAGATATAAAGAGTAATAGAATAAGGATAGCTCAGTAGGAAAATTCAGTGGAGAAAAGAGGCTGAGTAGCTTGGTTTACGCGGGAGACCAATAAAACTTCAAGACAAGAAGCTTGCACCACTTACGTAGGCCGCAGGCGTCCTTCCGTTCTCCCGAAGGAGAGGAGACACTGAGGCCTCCCCGGTCGGATCTTAGAAGCCCAGGCATAATTAGTAAGCATGGTGGGTTCCGCGCTCCAGATGGAGACTCAGCCAGAGTGAGAAAGAGAGCGACATGGGGAGACCAGTATTTCGAGAA…	T	intergenic	gene-EPHA7(dist=1574611),gene-MAP3K7(dist=1133901)
9	64115644	64116704	GTGCCAGGAGCCGGTGAGGCATTCCACTCGTGACAAAGGTCATGAGGAAGGAGGCTCGGCATACGCAAAGGCGGGATCGAGCCTCAGGAGTCCGCCCGGATATTCTCGAGCATTTTCCCCCCAAAAAACCATAGTCTGCCTACTTTATTGCTTTGTGCTCTCACCTCTGACTTTACTGGGGGCTGTCCCCTACCACCATCTCGCTCTCTCTGTTAAAGAGTTAACTTACAGCTCCAATTAATAAAGTTCCTGGGCAATTAGGAGTGTTTAAATCCAAACCCCTCAGATGGCTCTCTAACTCGCCTGACAAGTTTACCCGGACTCCTGCAGCTATGCATACGATTGTTTACAGTCTCCTAGCCTCCAGAGGCATGGGAAGCTTAAGATATTCAAATAGCT…	G	intergenic	gene-LOC100335322(dist=55403),gene-TBX18(dist=545238)
9	64116704	64116704	T	TTCCGCTATTCGAGAGGGCACCTGCGGCCTACGTAAGTGGTGCAAACTTCTTGTCTTGAAGTTTTATTGGTCTCCCGCGTAAACCAAGCTACTCAGCTTCTTTTCTCCACTGAATTTTCCTACTGAGCTATCCTCATTCTATTATTCTTTATATCTCTAATTAGCATATAAATAGTCGCCTAGGCCATCTCTCCTTCGAATACCCTGGATCAGCTGGGGCTGGTCCCCAGCAGAAAGG	intergenic	gene-LOC100335322(dist=56463),gene-TBX18(dist=545238)
9	65592800	65594094	TAATCTATTGCCGGGGACCAGCCCCGGCTGATCCAGGGTATTCGAAGGAGAGACGGCATAGGCGAGGATCAGGATACGATAGCTTCAATTAGATATTAATTAAAGATATAAAGAGTAATAGAATAAGGATAGCTCAGTAGGAAAATTCAGTGGAGAAAAGAGGCTGAGTAGCTTGGTTTATGCGGGAGACCAATAAAACTTCAAGACAAGAAGTTTGCACCACTTACGTAGGCCGCAGGCGTCCTTCCGTTCTCCCGAAGGAGAGGAGACACTGAGGCCTCCCCGGTCGGATCTTAGAAGCCCAGGCATAATTAGTAAGCATGGTGGGTTCCGCGCTCCAGATGGAGACTCAGCCAGAGTGGGAGAGAGAGCGACATGGGGAGACCAGTATTTCGAGAA…	T	intergenic	gene-RIPPLY2(dist=42233),gene-LOC101907989(dist=66725)
9	67698569	67698569	T	TATTTCCTGCCGGGGACCAGCCCCGGCTGATCCAGGGTATTCGAAGCGGGGACGGCGTCGGCGAGGATCAGGAAACAACTGCTTAATTAAACGTTAATTAAGGATATAAAGAGTAATAGAATGAGGATAGCTCAGTGAAGAAATTCAGTGAAGAAAAGAGGCTGAAATAAGGATAGCTCAGTGAGGAAATTCAGTGGAGAAAAGAGGCTGAATAATTCAGCCAGAAGGTAAGAGAAAGAACGACATGGTGAGACCAAGTTTCGGTGAACAAGGCCCGCACTTTATTTTCCAAAGTAGTTTTTATACCTTAAGTTATGCATAGAGGATAATGGGGGAAGGGGTAGAGTCCTGCAGTAAGCCAGGCTTTCTTCCTGCAAACTTATCATATGCAAAAGTTTA…	intergenic	gene-LAMA2(dist=9475),gene-ARHGAP18(dist=37176)
9	68635086	68642473	TACTTTACTGTGGGGAGCGAGCTCCGCCTCTGGCAAAGGTCATGAGGAAGGAGGCTTGGCATACGCAAAGGCGGGATCAAGCCTCAGGAGTCTCCCTGGAAATTCTCGAGCAATCTACCCCCAAAACCAGAGTCTGCCTACTTTCTGCTTTGTGCTTTCACCTACACCTCTGACTTTACGGGGGGCTGTCCCCCACTACCTCTCTGAAAAAAGAGTTAGCTTATAGCTCCAGTTAATAATTCCTGGGTGTGACAGTGTTTCAACCTACAAACTCCCTTGGAAGTCCTCTAGCCTGCCTGAATAGGTTTTTCCGGCCACATGTGATTGCTCAGAGCCTCCAAACTGTGAGAGGCATGAGATGTTCTAAACTGTCTAAATACAGATTCCTTTGAGCAGTCA…	T	intergenic	gene-TMEM200A(dist=94460),gene-SMLR1(dist=281741)
9	82622630	82622630	C	CTGTACCTGCCGGGAGCCGGCATATTGCATATTGAGTGCATATTGCATATTGAGTGCAGCACTTTTCAGGATCTGGAATAGCTCAACTGGAATTCTATCACTGCCGGTAGCCAGCGTGAGGAACTCCGCCTCTGGCAAAGGTCATGAGGAAGGAGGCTTGACATACGCAAAGGCGGGATCAAGCCTCAGGAGTCTCCCTGGAAATTCTCGAGCAATCTACCCCCAAAACCAGAGTCTGCCTACTTTCTGCTTTGTGCTTTCACCTACACCTCTGACTTTACGGGGGGCTGTCCCCCACTACCTCTCTGAAAAAAGTTAGCTTACAGCTCCAGTTAATAATTCCTGGGTGTGACAGTGTTTAACCTACAAACTCCTTTGGAAATCCTCTAGCCTGCCTGA…	intergenic	gene-LOC100294980(dist=285929),gene-EPM2A(dist=298783)
9	83613086	83613086	T	TCACAGCTGTGGGGAGCGAGCTCCGCCCGTGGCAAAGGTCATGAGGAACGAGGCTTGACATACGCAAAGGCGGGATCAAGCCTCAGGAGTCTCCCTGGAAATTCTCGAGCAATCTACCCCCAAAACCAGAGTCTGCCTACTTTCTGCTTTGTGCTTTCACCTACACCTCTGACTTTACGGGGGGCTGTCCCCCACTACCTCTCTGAAAAAAGAGTTCGCTTACAGCTCCAGTTAATAATTCCTGGGTGTGACAGTGTTTCAACCTACAAACTCCCTTGGAAGTCCTCTAGCCTGCCTGAATAGGTTTTTCCGGCCACATGTGATTGCTCAGAGCCTCCAAACTGTGAGAGGCATGAGATGTTCTAAACTGTCTAAATACAGATTCCTTTGAGCAGTTAA…	intronic	gene-GRM1
9	83641845	83641845	G	GAGGAATCTGCCGGGGACCAGCCCCGGCTGATCCAGGGTATTCGAAGGAGAGACGGCGTAGGCGAAGATCAGGAAACAATTGCTTAATTAAATGTTAATTAAGGATATAAAGAGTAATAGAATGAGGATAGCTCAGTAGGAAAATTCAGTGAAGAAAAGAGGCTGAATAATTCAGCCAGAAGGTAAGAGAAAGAACGACATGGTGAGACCAAGTTTCGGTGAACAAGGCCCGCAGTTTATTTTTCAAAGTAGTTTTTATACCTTAAGTTATGCACAGAGGATAATGGGGGAAGGGGTAGAGTCTTGCAGCAAACCAGGCTTTCTTCCTGCAAACTTATCATATGCAAAAGCTTAGGTGATTTGCATCATCTTCTGGCCCAGAGGCCTGTTAACATTTTA…	intronic	gene-GRM1
9	84545729	84547024	TAACATTTTGCCGGGGACCAGCCCCGGCTGATCCAGGGTATTCGAAGGGGAGACGGCGTCGGCGACTATTTATATGCTAATTAGAGATATAGAGAACAATAGAATGAGGATAGCTCAGTAGGAAATTTCAGTGGAGAAAAGAAGCTGAGTAGCTTGGTTTACGCGGGAGACCAATAAAACTTCAAGACAAGAAGTTTGCACCACTTACGTAGGCCGCAGGCGCCCTCTCGAATAGCGGAAGGTGTCTCACCCTAGACACCTTCTCGAGTGGGTCTTAGAAGCCCAGGCATGATTAGTAAGCGTGGTGGGTTCCGCGCTCCAGATGGAGACTCAGCTGGAAGTTAAAAGAAAGAATGACATGGGGAGACCAAGCGTTGGTGAGCAAGGCCCGTAGCTTTA…	T	intronic	gene-STXBP5
9	90455184	90456463	CCTTCCCTGCCGGGGTCCTGCCCCAGCTGATCCAGGGTATTCGAAGCGGGGATGGCGTCGGCGACCTATTTATTTAAATATTTTATCAAAGATATAAAGAGTAATAGGATGAGGATAGCTCAGTAGGAAAATTCAGTGGAGAAAAGAGGCTGAGTAGCTTGGTTTACGCGGGAGACCAATAAAACTTCAAGACAAGAAGTTTGCACCACTTACGTAGGCCGCAGGCGTCCTTCCGTTCTCCCGAAGGGAGACACTGAGGCCTCCCCGGTCGGATCTTAGAAGCCCAGGCATAATTAGTAAGCATGGCGGGTTCCGCGCTCCAGATGGAGACTCAACCAGAGTGAGAGAGAGAGCGACATGGGGAGACCAGTATTTCGAGAAACTGATCCCAATTCTTTA…	C	intergenic	gene-RGS17(dist=431022),gene-OPRM1(dist=347828)
9	90537421	90537593	GTCAGGCAGGCTTGAGAACCTTCAGAGGAGTTTGTAAGTTTAGAACACTCCTGTCACGCCCAGGAATTATTATTATTAACGCCCAGGAATTATTATTATTATTATTATTAACACGCCCAGGAATTATTATTATTAATTGTAAGTTTAGAACACTCCTGTCACGCCCAGGAATA	GG	intergenic	gene-RGS17(dist=513259),gene-OPRM1(dist=266698)
9	90579424	90579424	C	CCAACACTGTTGGGGGCCAGAGTGAGGTACTCCGCCCATGGCAAAGGTCATGAGGAAGGAGGCTGGACATACGCAAAGGCGGGATCGAGCCTCAGGAGTCCCCCTGGAAATCCTCGAGCATCTACCCCCATAACCAGAGCCTGCCTACTTTACTACTTTGTGCTCTCACCTACACCTCTGACTTTACGGGGGGCTGTCCCCCACCACCTCTTTCAGAGAAGGAGTTAACCTAGAGCTCCAGTCAATAAAAACTCTTGGGTGTGACAAGAGTGTTTTAACCTACAAACTCCTCTGAAGGTTCTCTAGCCTGCCTGACAGGCTCATCCAGCCACATGTGATTGCTCACAGCCTCCCAACCGTGAGAGGCACGAGATGCTTTAAACCCTCTAAAAACAGGTT…	intergenic	gene-RGS17(dist=555262),gene-OPRM1(dist=224867)
9	92392644	92392644	G	GCATGAATGTTGGGGGCCAGAGTGAGGTACTCCGCCCGTGGCAAAGGTCATGAGGAAGGAGGCTCGACATACGCAAAGGCAGGATCGAGCCTCAGGAGTCCCCCTGGAAATCCTCGAGCATCTACCCCCATAACCAGAGCCTGCCTACTTTACTACTTTGTGCTCTCACCTACACCTCTGACTTTACGGGCGGCTGTCCCCCACCACCTCTTTCGGAGAAGGAGTTAACTTAGACCTCCAGTTAATAAAAACTCCTGGGTGTGACAAGAGTATTTTAACCTACAAACTCCTCTGAAGGTTCTCTGGCCTGCCTGACAGGCTTGTCTGGCCACATGTGATCGCTCACAGCCTCCCAACCGTGAGAGGCACGAGATGCTTTAAACCTTCTAAAAACAGGTT…	intergenic	gene-NOX3(dist=327800),gene-ARID1B(dist=1012492)
9	96998563	96998563	G	GCATCAGTGTTGGGGGCCAGAGTGAGGTACTCCGCCCATGGCAAAGGTCATGAGGAAGGAGGCTCGACATACGCAAAGGCGGGATCGAGCCTCAGGAGTCCCCCTGGAACTCCTCGAGCATCTACCCCCATAACCAGAGCCTGCCTACTTTACTACTTTGTGCTCTTACCTACACCTCTGACTTTACGGGGGGCTGTCCCCCACCACCTCTTTCGGAGAAGGAGTTAACCTAGAGCTCCAGTCAATAAAAACTCTTGGGTGTGGCAAGAGTGTTTTAACCTACAAACTCCTCTGAAGGTTCTCTGGCCTGCCTGACAGGCTCGTCCGGCCACATGTGATTGCTCACAGCCTCCCAACCGTGAGAGGCACGAGATGCTTTAAACCTTCTAAAAACAGGTT…	intronic	gene-PRKN
9	98246481	98247779	ACTCACTGCCGGGGACCAGCCCCGGCTGATCCAGGGTATTCGAAGGAGAGACGGCATAGGTGAGGATCAGGATACAATAGCTTCAATTAGATATTAATTAAAGATATAAAGAGTAATAGAATAAGGATAGCTCAATAGGAAAATTCAGTGGAGAAAAGAGGCTGAGTGGCTTGGTTTACGCGGGAGACCAATAAAACTTCAAGACAAGAAGTTTGCACCACTTACGTAGGCCGCAGGCGTCCTTCCGTTCTCCCGAAGGAGAGGAGACACTGAGGCCTCCCCGGTCGGATCTTAGAAGCCCAGGCATAATTAGTAAGCATGGCGGATTCCGAGCTCCAGATGGAGACTCAGCCAGAGTGAGAGAGAGAGCGACATGGGGAGACCAGTATTTCGAGAAAC…	A	intronic	gene-PACRG
9	98246661	98246884	CGGGAGACCAATAAAACTTCAAGACAAGAAGTTTGCACCACTTACGTAGGCCGCAGGCGTCCTTCCGTTCTCCCGAAGGAGAGGAGACACTGAGGCCTCCCCGGTCGGATCTTAGAAGCCCAGGCATAATTAGTAAGCATGGCGGATTCCGAGCTCCAGATGGAGACTCAGCCAGAGTGAGAGAGAGAGCGACATGGGGAGACCAGTATTTCGAGAAACTGATC	CAT	intronic	gene-PACRG
9	98246920	98246971	CTGAGATGTTATACAAAAGTCACGTGGGGACAGCAGTCCTGACTTTTATTAA	C	intronic	gene-PACRG
9	99511480	99511480	A	AAGACGCTTGCCGAGGACCAGCCCCGGCCGATCCAGGGTATTCGAAGGAGAGACGGCGTAGGCGAAGATCAGGAAACAACTGCTAATTAAATGTTAATTAAGGATATAAAGAGTAATAGGATGAGGATAGCTCAGTAGGAAAATTCAGTGGAGAAAAGAGGCTGAGTAGCTTGGTTTACGCGGGAGACCAATAAAACTTCAAGACAAGAAGTTTGCACCACTTACGTAGGCCGCAGGCGTCCTTCCGTTCTCCCGAAGGAGAGGAGACACTGAGGCCTCCCCGGTTGGATCTTAGAAGCCCAGGCATAATTAGTAAGCATGGTGGGTTCCGCGCTCCAGATGGAGACTCAGCCAGAGTGAGAGAGAGAGAGACATGGGGAGACCAGTATTTCGAGAAAC…	intergenic	gene-QKI(dist=530513),gene-TRNAC-GCA-122(dist=144271)
9	100000000	100435092	CTATTTCTGCGGGGAGCCGGTGAGGCATTCTGCTCATGACAAAGGTCATGAGGAAGGAGGCTCGGCATACGCAAAGGCGGGATCGAGCCTCAGGAGTCCCCCCGGATATTCTCGAGCATTTTCCCCCAAAAAACCAGAGTCTGCCTACTTTATTGCTTTGTGCTCTCACCTCTGACTTTACTGGGGGCTGTCCCCTACCACCATCTCTCTCTCTCTCTGTCAAAGAGTTAACTTACAGCTCCAATTAATAAAGTTCCTGGGCAATTAGGAGTGTTTAAATCCAAACCCCTCAGATGGCTCTCTAACTCGCCTGACAAGTTTACCCGGACTCCTGCAGCTATGCATACGATTGTTTACAGTCTCCTAGCCTCCAGAGGCACGGGAAGCTTAAGATATTCA…	C	intronic	gene-C9H6orf118
9	100000000	100492330	ACACGAGAGTGCTGGGAGCGAGCTCCGCCCATGGCAAAGGTCATGAGGAAGGAGCCTCGGCATACGCAAAGGCGGGATCGAGCCTCAGGAGTTCCCCTGGAAATTCTCGAGCATCTACCCCCCAAACCAGAGTCTGCCTACTTTCTGCTTTGTGCTCTCACCCACACCTCTGACTTTACGGGGGGCTGTCCCCCACTACCTCTCTCTGAAAAAAGAGTTAGTTTACAGCTCCAGTTAATAAAATTCCTGGGTTTGACAGTGTTTCAACCTACAAACTCCTTTGGAAGTCCTCTAGCCTGCCTGAATAGGTTTTTCCGGCCACGTGTGATTGTTCAGAGCCTCCCAACTGTGAGAGGCAGGAGATGTTCTAAACTGTCTAAACACAGATTCTTTTGAGCA…	A	intronic	gene-PDE10A
9	101000000	100844465	AAGCTACCTGCGGGGAGCGAGCTCCGCCTCTGGCAAAGGTCATGAGGAAGGAGGCTTGGCATACGCAAAGGCGGGATCAAGCCTCAGGAGTCTCCCTGGAAATTCTCGAGCAATCTACCCCCAAAACCAGAGTCTGCCTACTTTCTGCTTTGTGCTTTCACCTACATCTCTGACTTTACGGGGGGCTGTCCCCCACTACCTCTCTGAAAAAAGTTAGCTTACAGCTCCAGTTAATAATTCCTGGGTGTGACAGTGTTTAACCTACAAACTCCTTTGGAAATCCTCTAGCCTGCCTGAATAGGTTTTTCCGGCCACATGTGATTGTTCAGAGCCTCCCAACTGTGAGAGGCAGGAGATGTTCTAAACTGTCTAAACACAGATTCTTTTGAGTAGTTAAAA…	A	intergenic	gene-PDE10A(dist=113549),gene-TBXT(dist=306677)
9	102000000	102037998	CG	CAATTGTTGGGGGCCAGAGTGAGGCACTCCGCCCCTGGTAAAGGTCATGAGGAAGGAGGCTCGACATATGCAAAGGTGGGATCGAGCCTCAGGAGTCCCCCTGGAAATCCTCGAGCATCTACCCCCATAACCTGAGCCTGCCTACTTTGCTACTTTGTGCTCTCACCTACACCTCTGACTTTACAGGGTGCTGTTCCCCACCACCTCTTTTGGAGAAAGAGTTAACTTAGAGCTCCAGTCAATAAAAACTCTTGGGCGTGACAAGAGTGTTTTAACCTACAAACTCCTCTGAAGGTTCTCTAGCCTGCCTGACAGGCTTGTCCAGCCACATGTGATTGCTCACAGCCTCCCAACCGTGAGAGGCACAAGATGCTTTAAACCTTCTAAAAACAGGTTCTT…	intergenic	gene-UNC93A(dist=2367),gene-AFDN(dist=240790)
10	2755850	2757100	CCCCAGCTGCCGGGAGCCGGCATATTGCATACTGAGTGCATATTGCATATTGCATATTGAGTGCAGCACTTTCCACAGCATCGTCTTTCAGGATCTGGAATAGCTCAACTGGAATTCTATCACTGCCAGGAGCCAGTGTGAGGAACCCCGCCCATGACAAAGGTCATGAGGAAGGAGGCTCGGCATACGCAAAGGCAGGATCCAGCTTCAGGAGTCCCCCTGGAAATTCTCGAGCATCTAGCCCCAAAACCAGAGTCTGCCTACTTTCTGCTTTGTGCTTTCACCTACACCTCTGACTTTACGGGGGGCTGTCCCCCACTACCTCTCTGAAAAAAGAGTTAGCTTACAGTTCCAGTTAATAATTCCTGGGTGTGACAGTGTTTAACCTACAAACTCCTT…	C	intergenic	gene-LOC104973030(dist=252217),gene-KCNN2(dist=175055)
10	2853912	2853912	G	GATAAGTTGCCGAGGACCAGCCCCGGCTGATCTAGGGTATTCGAAGGGGAGACGGCGTCGGCGACTATTTATATGCTAATTAGAGATATAGAGAACAATAGAATGAGGATAGCTCAGTAGGAAAATTCAGTGGAGAAAAGAAGCTGAGTAGCTTGGTTTACGCGGGAGACCAATAAAACTTCAAGACAAGAAGTTTGCACCACTTACGTAGGCCGCAGGTGCCCTCTCGAATAGCGGAAGGTGTCTCACCCTAGACACCTTCTCGAGTGGGTCTTAGAAGCCCAGGCATGATTAGTAAGCGTGGTGGGTTCCGCGCTCCAGATGGAGACTCAGCTGGAAGTTAAAAGAAAGAATGACATGGGGAGACCAAGCGTTGGTGAGCAAGGCCCGTAGCTTTAT…	intergenic	gene-LOC104973030(dist=350279),gene-KCNN2(dist=78243)
10	4324833	4326018	TCCCCAGTGCCGGGAGCCGGCATATTGCATATTGAGTGCAGCACTTTTCAGGATCTGGAATAGCTCAACTGGAAATTCTCTCACTGCCGGTAGCCAGCGTGAGGAACTCCGCCCATGACAAAGGTCATGAGGAAGGAGGCTCGGCATACGCAAAGGCGGGATCGAGCTTCAGGAGTCTCCCTGGAAATTCTCGAGCAATCTACCCCCAAAACCAGAGTCTGCCTACTTTCTGCTTTGTGCTTTCACCTACACCTCTGACTTTACGGGGGGCTGTCCCCCACTACCTCTCTGAAAAAAGAGTTAGCTTATAGCTCCAGTTAATAATTCCTGGGTGTGACAGTGTTTCAACCTACAAACTCCCTTGGAAGTCCTCTAGCCTGCCTGAATAGGTTTTTCCGG…	T	intergenic	gene-CCDC112(dist=7224),gene-FEM1C(dist=32155)
10	6330467	6330467	G	GGGACGGTGCCGGGGACCAGCCCCGGCTGATCCAGGGTATTCGAAGGAGAGACGGCGTAGGCGAAGATCAGGAAACAATTGCTTAATTAAATGTTAATTAAGGATATAAAGAGTAATAGAATGAGGATAGCTCAGTGAAGAAATTCAGTGGAGAAAAGAGGCTGAATAATTCAGCCAGAAGGTAAGAGAAAGAACGACATGGTGAGACCAAGTTTCGGTGAACAAGGCCCGCACTTTATTTTTCAAAGTAGTTTTTATACCTTAAGTTATGCATAGAGGATAATGGGGGAAGGGGTAGAGTCAGGCAGCAAGCCAGGCTTTCTTCCTGCAAACTTATCATATGCAAAAGCTTAGGTGATTTGCATCATCTTCTGGCCCGGAGGCCTGTTAACATTTTAA…	intergenic	gene-DRD1(dist=612335),gene-GCNT4(dist=170138)
10	6361531	6361531	C	CCATCACTGCGGGGAGCCGGTGAGGCATTCTGCTCATGACAAAGGTCATGAGGAAGGAGGCTCGGCATACGCAAAGGCAGGATCAAGCCTCAGGAGTCCACCCGGATATTCTCGAGCATTTTCCCCCAAAAAACCAGAGTCTGCCTACTTTATTGCTTTGTGCTCTCACCTCTGACTTTACTGGGGGCTGTCCCCTACCACCATCTCTCTCTCTCTCTGTCAAAGAGTTAACTTACAGCTCCAATTAATAAAGTTCCTGGGCAATTAGGAGTGTTTAAATCCAAACCCCTCAGATGGCTCTCTAACTCACCTGACAAGTTTACCCGGACTCCTGCAGCTATGCATACGATTGTTTACAGTCTCCTAGCCTCCAGAGGCACGGGAAGCTTAAGATATTCA…	intergenic	gene-DRD1(dist=643399),gene-GCNT4(dist=139074)
10	25371755	25371755	G	GGACAGTTGCCGAGGACCAGCCCCGGCTGATCCAGGGTATTTGAAGGAGAGACGGCGTAGGCGAAGATCAGGAAACAACTGCTTAATTAAATGTTAATTAAGGATATAAAGAGTAATAGGATGAGGATAGCTCAGTGAGGAAATTCAGTGGAGAAAAGAGGCTGAGTGGCTTGGTTTACGCGGGAGACCAATAAAACTTCAAGACAAGAAGTTTGCACCACTTACGTAGGCCACAGGCGTCCTTCCGTTCTCCCGAAGGAGAGGAGACACTGAGGCCTCCCCGGTCGGATCTTAGAAGCCCAGGCATAATTAGTAAGCATGGTGGGTTCCGCGCTCCAGATGGAGACTCAGCCAGAGTGAAAGAGAGAGAGACATGGGGAGACCAGTATTTCGAGAAAC…	intergenic	gene-LOC112448423(dist=9311),gene-LOC101904021(dist=13427)
10	26576781	26577904	GGGGTCGTGCCGGGGACCAGCCCCGGGTGATCCAGGGTATTCGAAGGAGAGACGGCGTAGGCGAAGATCAGGAAACACTTGCTTAATTAAATGTTAATTAAGGATATAAAGAGTAATAGAATGACGATAGCTCAGTAAAATTCAGTGAAGAAAAGAGGCTGAAATAAGGATAGCTCAGTGAAGAAATTCAGTGGAGAAGAGAGGCTGAATAATTCAGCCAGAAGGTAAGAGAAAGAACGACATGGTGAGACCAAGTTTCGGTGAACAAGGCCCGCACTTTATTTTCCAAAGTAGTTTTTATACCTTAAGTTATGCATAGAGGATAATGGGGGAAGGGGTAGAGTCTTGCAGCAAAGCAGGCTTTCTTCCTGCAAACTTATCATATGCAAAAGCTTAGGT…	G	intergenic	gene-RNASE11(dist=64224),gene-RNASE10(dist=14867)
10	34344340	34344340	T	TAGGTAATTGCCGGGGTCCAGCCCCGGCTGATCCAGGGTATTCGAAGGAGAGACGGCATAGGCGAAGATCAGGAAACAATTGCTTAATTAAACATTAATTAAGGATATAAAGAGTAATAGAATGAGGATAGCTCAGTGAGGAAATTCAGTGGAGAAAAGAGGCTGAATAATTCAGCCAGAAGGTAAGAGAAAGAACGACATGGTGAGACCAAGTTTCGGTGAACAAGGCCCACACTTTATTTTCCAAAGTAGTTTTTATACCTTAAGTTATGCATAGAGGATAATGGCGGAAGGCGTAGAGTCAGGCAGCAAGCCAGGCTTTCTTCCTGCAAACTTATCATATGCAAAAGCTTAGGTGATTTGCATCATCTACTGGCCCGGAAGCCTGTTAACATTTTA…	intergenic	gene-RASGRP1(dist=67835),gene-THBS1(dist=865208)
10	37859458	37859458	G	GGCGCCACCTGCCGGGGACCAGCCCCGGCTGATCCAGGGTATTCGAAGGAGAGACGGCGTCGGCGAGGGTCAGGATACGATAGCTTCAATTAGATACTAATTAGAGATATAAAGAGTAATAGAATAAGGATAGCTCAGTAGGAAAATTCAGTGGAGAAAAGAGGCTGAGTAGCTTGGTTTACGCGGGGGACCAATAAAACTTCAAGACAAGAAGCTTGCACCACTTACGTAGGCCGCAGGCGTCCTTCCGTTCTCCCAAAGGAGAGGAGACACTGAGGCCTCCCCGGTCGGATCTTAGAAGCCCAGGCATAATTAGTAAGCATGGTGGGTTCCGCGCTCCAGATGGAGACTCAACCAGAGTGAGAGAGAGAGCGACATGGGGAGACCAGTATTTCAAGA…	intronic	gene-SNAP23
10	40162918	40164215	CTTCCTGTGCGGGGAGCCGGTGAGGCATTCCACTCATGACAAAGGTCATGAGGAAGGAGGCTCGGCATACGCAAAGGCGGGATCGAGCCTCAGGAGTCCCCCCGGATATTCTCGAGCATTTTCCCCCAAAAAACCAGAGTCTGCCTACTTTATTGCTTTGTGCTCTCACCTCTGACTTTACTGGGGGCTGTCCCCTACCACCATCTCTCTCTCTCTGTGTCAAAGAGTTAACTTACAGCTCCAATTAATAAAGTTCCTGGGCAATTAGGAGTGTTTAAATCCAAACCCCTCTGATGGCTCTCTAACTCGCCTGACAAGTTTACCCGGACTCCTGCAGCTATGCATACGATTGTTTACAGTCTCCTAGCCTCCAGAGGCATGGGAAGCTTAAGATATTCA…	C	intronic	gene-MDGA2
10	44022396	44023694	GGCAACCTGCCGGGAGCCGGTGAGGCATTCTGCTCATGACAAAGGTCATGAGGAAGGAGGCTCGGCATACGCAAAGGCGGGATCGAGCCTCAGGAGTCCGCCCGGATATTCTCGAGCATTTTCCCCCAAAAAACCAGAGTCTGCCTACTTTATTGCTTTGTGCTCTCACCTCTGACTTTACTGGGGGCTGTCCCCTACCACCATCTCTCTCTCTCTCTGTCAAAGAGTTAACTTACAGCTCCAATTAATAAAGTTCCTGGGCAATTAGGAGTGTTTAAATCCAAACCCCTCAGATGGCTCTCTAACTCGCCTGACAAGTTTACCCGGACTCCTGCAGCTATGCATACGATTGTTTACAGTCTCCTAGCCTCCAGAGGCATGGGAAGCTTAAGATATTCA…	G	intergenic	gene-TRIM9(dist=77627),gene-TMX1(dist=33951)
10	50779498	50780807	TGTACCTTGCCGGGGTCCAGCCCTGGTGGATCCAGGGAAATTCAAAGGAGAGACGGCATTGGCGAATACACTGGCTTTAATTAGATATTAATTAGAGATATAAAGAGTAATAGAATGAGGATAGCTCAGCAGGAAAACTCAGTGGAGAAAAGAGACTGAGTAGCTTGGTTTATGCGGAAAACCAATAAAACTTCAAGACAAGAAGTTTGCACCACTTACGTAGGCTGCAGGTGTCCTTCCATTCTCCCGAAGGAGAGGAGACACTGAGGCCTCCCCGGTCAGATCTTAGAAGCCCAGGCAAAATTAGTAAGCTTGGCGGGCCTCCGCACTCCAGATGGAAACTCAGCCAGAGGTTGAGAGAAAGAATGACATGAGGAGACCAGTATTTCAAGGAACTGA…	T	intergenic	gene-GCNT3(dist=139737),gene-FAM81A(dist=25348)
10	56118541	56119720	CCACCTTACTGCCGGGAGCCGGCATATTGCATATTGAGTGCATATTGCATATTGAGTGCAGCACTTTTCAGGATCTGGAATAGCTCAACTGGAATTCTATCACTGCCGGTAGCCAGCGTGAGGAACTCCACCCATGACAAAGGTCATGAGGAAGGAGGCTTGGCATACGCAAAGGCGGGATCAAGCCTCAGGAGTCTCCCTGGAAATTCTCGAGCAATCTACCCCCAAAACCAGAGTCTGCCTACTTTCTGCTTTGTGCTTTCACCTACACCTCTGACTTTATGGGGGGCTGTCCCCCACTACCTCTCTGAAAAAAGTTAGCTTACAGCTCCAGTTAATAATTCCTGGGTGTGACAGTGTTTAACCTACAAACTCCTTTGGAAATCCTCTAGCCTGCCT…	C	intronic	gene-UNC13C
10	59826668	59827972	GATTTTCTGTTGGGGGCCAGAGTGAGGTACTCCGCCCATGACAAAGGTCATGAGGAAGGAGGCTCGACATACGCAAAGGCGGGATCGAGCCTCAGGAGTCCCCCTGGAACTCCTCGAGCATCTACCCCCATTACCAGAGCCTGCCTACTTTACTACTTTGTGCTCTTACCTACACCTCTGACTTTACGGGGGGCTGTCCCCCACCACCTCTTTCGGAGAAGGAGTTAACCTAGAGCTCCAGTTAATAATAATTCCTGGGCATGATAAGAGTGTTTTAACTTACAAACTCCTCTGAAGGTTCTCTAGCCTGCCTGACAGGCTTGTCCGGCCGCATGTGATTGCTCACAGCCTCCCAACCGTGAGAGGCACGAGATGCTTTAAACCTTCTAAAAACAGGTT…	G	intronic	gene-USP8
10	59826708	59826763	ACAAAGGTCATGAGGAAGGAGGCTCGACATACGCAAAGGCGGGATCGAGCCTCAGG	A	intronic	gene-USP8
10	59826827	59826903	GTGCTCTTACCTACACCTCTGACTTTACGGGGGGCTGTCCCCCACCACCTCTTTCGGAGAAGGAGTTAACCTAGAGC	G	intronic	gene-USP8
10	59826971	59827027	TAGCCTGCCTGACAGGCTTGTCCGGCCGCATGTGATTGCTCACAGCCTCCCAACCGT	TTAG	intronic	gene-USP8
10	59827052	59827117	TTCTAAAAACAGGTTCCTTAGAAAAGTTAGAAAACTATTAGTATAAGTATAATGGGCTGATTAGAA	TC	intronic	gene-USP8
10	64770158	64778759	GACTCCGGTGCCGGGAGCCGGCATATTGCATATTGAGTGCATATTGCATATTGAGTGCAGCACTTTTCAGGATCTGGAATAGCTCAACTGGAATTCTATCACTGCCGGTAGCCAGCATGAGGAACTCCGCCTCTGGCAAAGGTCATGAGGAAGGAGGCTTGACATACGCAAAGGCGGGATCAAGCCTCAGGAGTCTCCCTGGAAATTCTCGAGCAATCTACCCCCAAAACCAGAGTCTGCCTACTTTCTGCTTTGTGCTTTCACCTACACCTCTGACTTTACGGGGGGCTGTCCCCCACTACCTCTCTGAAAAAAGTTAGCTTACAGCTCCAGTTAATAATTCCTGGGTGTGACAGTGTTTAACCTACAAACTCCCTTGGAAGTCCTCTAGCCTGCCTG…	G	intergenic	NONE(dist=NONE),gene-SQOR(dist=32164)
10	65002712	65002712	A	AATAGGAGTGCGGGGAGCGAGCTCCGCCTCTGGCAAAGGTCATGAGGAAGGAGGCTTGGCATACGCAAAGGCGGGATCAAGCCTCAGGAGTCTCCCTGGAAATTCTCGAGCAATCTACCCCCAAAACCAGAGTCTGCCTACTTTCTGCTTTGTGCTTTCACCTACACCTCTGACTTTACGGGGGGCTGTCCCCCACTACCTCTCTGAAAAAAGTTAGCTTACAGCTCCAGTTAATAATTCCTGGGTGTGACAGTGTTTAACCTACAAACTCCTTTGGAAATCCTCTAGCCTGCCTGAATAGGTTTTTCCGGCCTCATGTGATTGTTCAGAGCCTCCCAACTGTGAGAGGCAGGAGATGTTCTAAACTGTCTAAACACAGATTCTTTTGAGTAGTTAAAA…	intergenic	gene-SLC30A4(dist=27053),gene-C10H15orf48(dist=12949)
10	65192494	65192758	GATAATCACGATGGTGTGATCACTCAACTAGAGCCAGACATCCTGGAATGCGAAGTCAAGTGGGCCTTAGGAAGCATCACTACCCAACAAAACTCGTGGAGGTGATGGAATTCCAGCTGAGATATTTCAAATCTTAAAGATGATGCTGTGAAAGTGATGCACTCAATATGCCAGCAAATTTGGAAAACTCAGCAGTGGCCACAGGACTGGAAAAGGTCAGTTTTCATTCCAATCTCAAAGAAAGGCAATGCCAAAGAATGTTCAA	G	intronic	gene-SLC28A2
10	70256658	70256658	T	TATAATAGTGCCGGAGCCAGCCGGCAAAGTCGATCAGGTCCCGAGAACGTGCACGGCGGGGCTAAGAAAGAAACTAAAGCAAGAGACTACAAAGATGGGGTCGAGAGGTTCAGACACGTCACCACGAAGGGACGCAGTCTGACACCCACTTTATTCAACATCTCATATTTATACAGAAAAGCGTGAGAAAGACAAGACAGTTGACATTTTTTCTTGGTTGGCCTATACATCTTACAAACAGTTACAAGAAATCTTGAGAGCATGGGAATGGCTCCCTGTTATTATTTCTTACACCAGATAACATTTCTCTGTGCGTGAGAAGTTTGCACAGAACTCCAGGTGCCTGCAGTAAATAAGCGCCTAATCTCTGGGGTGGCGGGACAGAGAGCTATGTTTGCA…	intergenic	gene-SLC35F4(dist=324742),gene-ARMH4(dist=75985)
10	74850956	74852074	TTGCCGGGGACCAGCCCCGGTTGATCCAGGGTATTCGAAGGAGAGACGGCGTAGGCGAAGATCAGGAAACAATTGCTTAATTAAATGTTAATTAAGGATATAAAGAGTAATAGAATGAGGATAGCTCAGTGAGGAAATTTAGTGGAGAAAAGCGGTTGAAATAAGGATAGCTCAGTGAGGAAATTCAGTGTAGAAAAGAGGCTGAATAATTCAGCCAGAAGGTAAGAGAAAGAACGACATGGTGAGACCAAGTTTCGGTGAACAAGGCCCGCACTTTATTTTCCAAAGTAGTTTTTATACCTTAAGTTATGCATAGAGGATAATGGGGGAAGGGGTAGAGTCTTGCAGCAAACCAGGCTTTCTTCCTGCAAACTTATCATATGCAAAAGCTTAGGTGAT…	T	intergenic	gene-TRNAC-GCA-131(dist=267481),gene-KCNH5(dist=88390)
10	92356079	92356079	G	GGTTGGTTGCCGGGGACCAGCCCCGGCTGATCCAGGGTATTCGAAGGAGAGACGGCGTAGGCGAAGATCAGGAAACAATTGCTTAATTAAACGTTAATTAAGGATATAAAGAGTAATAGAATGAGGATAGCTCAGTAAAATTCAGTGAAGAAAAGAGGCTGAAATAAGGATAGCTCAGTGAGGAAATTCAGTGGAGAAAAGAGGCTGAATAATTCAGCCAGAAGGTAAGAGAAGTAACGACATGGTGAGACCAAGTTTCGGTGAACAAGGCCCGTACTTTATTTTCCAAAGTAGTTTTTATACCTTAAGTTATGCATAGAGGATAATGGGGGAAGGGGTAGAGTCAGGCAGCAAGCCAGGCTTTCTTCCTGCAAACTTAGCATATGCAAAAGTTAGGTG…	intronic	gene-TSHR
10	92749874	92749874	C	CTTAACTGCTCAAAGGAATCTGTATTTAGACAGTTTAGAACATCTCCTGCCTCTC	intergenic	gene-STON2(dist=24345),gene-SEL1L(dist=8541)
10	94195325	94196604	CCCCTGGTGCCGGGGTCCTGCCCCGGCTGATCCAGGGTATTCGAAGCGGGGACGGCGTCGGCGACCTATTTATTTAAATATTTTATCAAAGATATAAAGAGTAATAGGATGAGGATAGCTCAGTAGGAAAATTCAGTGGAGAAAAGAGGCTGAGTAGCTTGGTTTACGCGGGAGACCAATAAAACTTCAAGACAAGAAGTTTGCACCACTTACGTAGGCCACAGGCGTCCTTCCGTTCTCCCGAAGGAGAGGAGACACTGAGGCCTCCCCGGTCGGATCTTAGAAGCCCAGGCATAATTAGTAAGCATGGTGGGTTCCGCGCTCCGGATGGAGACTCAACCAGAGTGAGAGAGAGAGCGACATGGGGAGACCAGTATTTCGAGAAACTGATCCCAATTC…	C	intergenic	gene-LOC112448582(dist=378910),gene-LOC100140640(dist=77302)
10	96039207	96039207	T	TCCCAGCTGCCGGGGACCAGCCCCGGTGGATCCAGGGTATTCGAAGCGGGGACGGCGTCGGCGAGGATCAGGAAACAACTGCTTAATTAAACGTTAATTAAGGATATAAAGAGTAATAGAATGAGGATAGCTCAGTGAAGAAATTCAGTGGAGAAAAGAGGCTGAATAATTCAGCCAGAAGGTAAGAGAAAGAACGACATGGTGAGACCAAGTTTCGGTGAACAAGGCCCGCACTTTATTTTTCAAAGTAGTTTTTATACCTTAAGTTATGCACAGAGGATAATGGGGGAAGGGGTAGAGTCTTGCAGCAAACCAGGCTTTCTTCCTGCAAACTTATCATATGCAAAAGCTTAAGTGATTTGCATCATCTTCTGGCCCGGAGGCCTGTTAACATTTTAA…	intergenic	gene-LOC100140640(dist=1763486),gene-MIR2293(dist=341367)
10	97133127	97134429	GGTCGTCTGCCGGGGACCAGCCCCGGCTGATCCAGGGTATTCGAAGGAGAGACGGCATAGGCGAGGATCAGGATACGATAGCTTCAATTAGGTATTAATTAAAGATATAAAGAGTAATAGAATAAGGATAGCTCAGTAGGAAAATTCAGTGGAGAAAAGAGGCTGAGTAGCTTGGTTTACGCGGGAGACCAATAAAACTTCAAGACAAGAAGCTTGCACCACTTACGTAGGCCGCAGGCGTCCTTCCGTTCTCCCGAAGGAGAGGAGACACTGAGGCCTCCCCGGTCGGATCTTAGAAGCCCAGGCATAATTAGTAAGCATGGTGGGTTCCGCGCTCCAGATGGAGACTCAGCCAGAGTGAGAAAGAGAGCGACATGGGGAGACCAGTATTTCGAGAAA…	G	intergenic	gene-MIR2293(dist=752482),gene-FLRT2(dist=19098)
10	99022536	99022536	C	CCTGGATTGTTGGGGGCCAGAGTGAGGTACTCCGCCCGTGACAAAGGTCATGAGTAAGGAGGCTCGACATACGCAAAGGCGGGATCGAGCCTCAGGAGTCCCCCTGGAACTCCTCGAGCATCTACCCCCATAACCAGAGCCTGCCTACTTTACTACTTTGTGCTCACCTACACCTCTGACTTTACGGGGGGCTGTCCCCCACCACCTCTTTTGGAGAAGGAGTTAACTTAGAGCTCCAGTTTATAATAATTCCTGGGCGTGATAAGAGTGTTTTAACCTACAAACTCCTCTGAAGGTTCTCTAGCCTGCCTGACAGGCTCGTCCGGCCACATGTGATTGCTCACAGCCTCCCAACCGTGAGAGGCACAAGATGCTTTAAACCCTCTAAAAACGGGTTCT…	intergenic	gene-TRNAC-ACA-51(dist=1190440),gene-GALC(dist=644290)
10	99608029	99608030	TG	TACCAGACTGCCGGGAGCCGGCATATTGCATATTGAGTGCATATTGCATATTGAGTGCAGCACTTTTCAGGATCTGGAATAGCTCAACTGGAATTCTATCACTGCCGGTAGCCAGCATGAGGAACTCCGCCCATGACAAAGGTCATGAGGAAGGAGGCTCGGCATACGCAAAGGAGGGATCGAGCTTCGGGAGTCCCCCTGGAAATTCTCGAGCATATACCCCCAAAACCAGAGTCTGCCTACTTTCTGCTTTGTGCTTTCACCTACACCTCTGACTTTACGGGGGGCTGTCCCCCACTACCTCTCTGAAAAAAGAGTTAGCTTACAGCTCCAGTTAATAATTCCTGGGTGTGACAGTGTTTAACCTACAAACTCCTTTGGAAGTCCTCTAGCCTGCCT…	intergenic	gene-TRNAC-ACA-51(dist=1775933),gene-GALC(dist=58796)
10	100000000	100492138	T	TCCTCTAGCCCCGCTACAAAAGGAGGACCTAGCGTTATGATGCTACAAGCAGCCCTCTAGCCCCGCTACAAAAGGAGGACCTAATGTTATGACGCTACAAGCAGC	intergenic	gene-EML5(dist=32100),gene-TTC8(dist=10836)
11	234493	234493	T	TACTTGGTGCCGGGGTCCTCCCCCGGCTGATCCAGGGTATTCGAAGCGGGGACGGCGTCGGCGACCTATTTATTTATTTAAATATTTTATCAAAGATATAAAGAGTAATAGGATGAGGATAGCTCAGTAGGAAAATTCAGTGGAGAAAAGAGGCTGAGTGGCTTGGTTTACGCGGCAGACCAATAAAACTTCAAGACAAGAAGTTTGCACCACTTACGTAGGCCGCAGGCGTCCTTCCATTCTCCCGAAGGAGAGGAGACACTGAGGCCTCCCCAGTCGGATCTTAGAAGCCCAGGCATAATTAGTAAGCATGGTGGGTTCCGCGCTCCAAATGGAGACTCAACCAGAGTGAGAGAGAGAGCGACATGGGGAGACCAGTATTTCGAGAAACTGATCCCA…	intergenic	gene-ZC3H8(dist=3417),gene-FBLN7(dist=11039)
11	772576	773675	GCTTTGGTGCGGGGAGTGAGCTCCGCCCCTGGCAAAGGTCATGAGGAAGGAGGCTTGGCATATGCAAAGGCGGGATCAAGCCTCAGGAGTCTCCCTGGAAATTCTCGAGCAATCTACCCCCAAAACCAGAGTCTGCCTACTTTCTGCTTTGTGCTTTCACCTACACCTCTGACTTTATGGGGGGCTGTCCCCCACTACCTCTCTGAAAAAAGAGTTAGCTTACAGCTCCAGTTAATAATTCTTGGGTGTGACAGTGTTTCAACCTACAAACTCCTTTGGAAATCCTCTAGCCTGCCTGAATAGGTTTTTCCAGCCACGTGTGACTGTTCAGAGCCTCCCAACTGTGAGAGGCAGGAGATGTTCTAAACTGTCTAAATACAGATTCCTTTGAGCAGTTAA…	G	intergenic	gene-TRNAC-GCA-137(dist=39540),gene-TRNAG-UCC-24(dist=184358)
11	6221189	6221189	C	CAAGTAGTGCCGGGGACCAGCCCCGGCTGATCCAGGGTATTCGAAGGAGAGACGGCGTAGGCGAAGATCAGGAAACAATTGCTTAATTAAACGTTAATTAAGGATATAAAGAGTGATAGGATGAGGATAGCTCAGTAGGAAAGTTCAGTGGAGAAAAGAGGCTGAGTAGCTTCGTTTACGCGGGAGACCAATAAAACTTCAAGACAAGAAGTTTGCACCACCTACGTAGGCCACAGGCGTCCTTCCGTTCTCCCGAAGGAGAGGAGACACTGAGGCCTCCCCGGTCGGATCTTAGAAGCCCAGGCATAATTAGTAAGCATGGTGGGTTCCGCGCTTCAGATGGAGACTCAACCAGAGTGAGAGAGAGAGCGACATGGGGAGACCAGTATTTCGAGAAAC…	intergenic	gene-RNF149(dist=12662),gene-CREG2(dist=7403)
11	9422168	9423167	CTTTCCATTAGTAAGCATGGTGGGTTCCGCGCTCCAGATGGAGACTCAGCCAGAGTGAGAGAGAGAGCGACATGGGGAGACCAGTATTTCGAGAAACTGATCCCAATTCTTTATTTTCCAGAGTCTGTTTTTATACACTAAGATGTTATACAAAAGTCACGTGGGGACAGCAGTCCTGACTTTTATTAAAGTCAGGTGCTTCATACAAATGTATACAGAGGTCTTAGGGGTGTTACATCATCTTCTGGCCAGGGGGGCCTGCTGACAATTTACGACCCTCTCCTTGTGACAGCGGTCAGTCAATCAGGACACTTATTTCTCCAGGGCTGATTATTCTCAAAACAGACGCCACCCAAATAAAGTTACATCCCTACAGGGTGAGGGTGTAGTGGGTTTTAG…	C	intergenic	gene-FHL2(dist=106080),gene-TACR1(dist=58905)
11	9422172	9422173	CC	CTCTGCCGGGGACCAGCCCCGGCTGATCCAGGGTATTCGAAGGAGAGACGGCATAGGCGAGGATCAGGATACAATAGCTTCAATTAGATATTAATTAAAGATATAAAGAGTAATAGAATAAGGATAGCTCAGTAGGAAAATTCAGTGGAGAAAAGAGGCTGAGTAGCTTGGTTTACGCGGGAGACCAATAAAACTTCAAGACAAGAAGTTTGCACCACTTACGTAGGCCGCAGGCGTCCTTCCGTTCTCCCGAAGGAGAGGAGACACTGAGGCCTCCCCGGTCGGATCTTAGAAGCCCAGGCATA	intergenic	gene-FHL2(dist=106084),gene-TACR1(dist=59899)
11	20967346	20968640	GAGTTGGATGCCGAGGACCAGCCCCGGCTGATCCAGGGTATTCGAAGGGGAGACGGCGTCGGCGACTATTTATATGCTAATTAGAGATATAGAGAACAATAGAATGAGGATAGCTCAGTAGGAAATTTCAGTGGAGAAAAGAAGCTGAGTAGCTTGGTTTACGCGGGAGACCAATAAAACTTCAAGACAAGAAGTTTGCACCACTTACGTAGGCCGCAGGCGCCCTCTCGAATAGCGGAAGGTGTCTCACCCTAGACACCTTCTCGAGTGGGTCTTAGAAGCCCAGGCATGATTAGTAAGCGTGGTGGGTTCCGCGCTCCAGATGGAGACTCAGCTGGAAGTTAAAAGAATGACATGGGGAGACCAAGCGTTGGTGAGCAAGGCCCGTAGCTTTATTTT…	G	intergenic	gene-HNRNPLL(dist=19184),gene-LOC782437(dist=42792)
11	26069162	26070464	CCAACAGCCTGCCGGGGACCAGCCCCGGCTGATCCAGGGTATTCGAAGGAGAGACGGCATAGGCGAGGATCAGGATACGATAGCTTCAATTAGGTATTAATTAAAGATATAAAGAGTAATAGAATAAGGATAGCTCAGTAGGAAAATTCAGTGGAGAAAAGAGGCTGAGTAGCTTGGTTTACGCGGGAGACCAATAAAACTTCAAGACAAGAAGTTTGCACCACTTACGTAGGCCGCAGGCGTCCTTCCGTTCTCCCGAAGGAGAGGAGACACTGAGGCCTCCCCGGTCGGATCTTAGAAGCCCAGGCATAATTAGTAAGCATGGTGGGTTCCGCGCTCCAGATGGAGACTCAACCAGAGTGAGAGAGAGAGCGACATGGGGAGACCAGTATTTTGAGA…	C	intronic	gene-ABCG5
11	30908514	30908602	TTTAAGATCTTGCCAGGGTCCAGCCCCGGTGGATCCAGGGAATTCGAAGCGGGGACGGCGTCGGCGAGGATCAGGAAACAATTGCTTAA	T	intergenic	gene-STON1(dist=15827),gene-GTF2A1L(dist=8082)
11	33043541	33043541	T	TAAGGAATGCGGGGAGCCGGTGAGGCATTCCACTCGTGACAAAGGTCATGAGGAAGGAGGCTCGGCATACGCAAAGGCGGGATCGAGCCTCAGGAGTCCCCCCGGATATTCTCGAGCATTTTCCCCCAAAAAAACCAGAGTCTGCCTACTTTATTGCTTTGTGCTCTCACCTCTGACTTTACTGGGGGCTGTCCCCTACCACCGTCTCTCTCTCTCTGTGTCAAAGAGTTAACTTACAGCTCCAATTAATAAAGTTCCTGGGCAATTAGGAGTGTTTAAATCCAAACCCCTCTGATGGCTCTCTAACTCGCCTGACAAGTTTACCCGGACTCCTGCAGCTATGCATACGATTGTTTACAGTCTCCCAGCCTCGAGAGGCATGGGAAGCTTAAGATATTC…	intronic	gene-NRXN1
11	40785066	40785067	GG	GAGAAAGAACGACATGGGAGACCAAGTTTCGGTGAACAAGGCCTTTACTTTATTTTCCAAAGTAGTTTTTATACCTTAAGTTATGCATAGAGGATAATGGGGGAAGGGGTAGAGTCATGCAGTAAGCCAGGCTTTCTTCCTGCAAACTTATCATATGCAAAAGTTTAGGTGATTTACATCATCTTCTGGCCCGGAGGCCTGTCAACATTTTAAGATCCTTTTTTCAGAAAACTTATTTTTCTCTAAAGGTGATTAT	intronic	gene-VRK2
11	46060529	46060529	G	GATGCCCTGTTGGGGGCCAGAGTGAGGAACTCTTGGGCCCTGGAAGGCGCAAACGGAGGCGGCGGCTATATGATAGCTATGGTCTTACTGTGTTACAACAACTGCAGGATTTAATGTGATTGTGACGGTTTGTGGTCTTGCTTATCCTAGGAATATCAGCTTTGATAGCAACAATTATTTCTGTTACTGCGGCAGCAATATCATTGACTCAACAAGTGCATACTGCCCAATATGTTGATACCATGTCTAAAATTGTTTCTTTAACTCTAGAGAAAATTGGAGATGAGAGTAGACGCCTTAGAAGAAGCAATTATGCATATTGGGATTGAGTTACAGGCTTTAAAGGTGAAGATGGCTTTGACATGCCACGCTGATTACAGGTGGATATGCATGACATCT…	intergenic	gene-NCK2(dist=26461),gene-TTL(dist=148760)
11	46806641	46806641	A	AAGTATTGTGTTGGGGGCCAGAGTGAGGTACTCCGCCCATGGCAAAGGTCATGAGGAAGGAGGCTCGACATACGCAAAGGCGGGATCGAGCCTCAGGAGTCCCCCTGGAAATCCTCGAGCGTCTACCCCCATAACCAGAGCCTGCCTACTTTACTACTTTGTGCTCTTACCTACACCTCTGACTTTACGGGGGGCTGTCCCCCACCACCTCTTTCGGAGAAGGAGTTAACCTAGAGCTCCAGTCAATAAAAACTCTTGGGTGTGACAAGAGTGTTTTAACCTACAAACTCCTCTGAAGGTTCTCTAGCCTGCCTGACAGGCTCATCGGGCCACATGTGATTGCTCACAGCCTCCCAACCATGAGAGGCACGAGATGCTTTAAACCCTCTAAAAACAGGT…	intergenic	gene-IL1F10(dist=35627),gene-IL1RN(dist=9273)
11	49293243	49293243	G	GACTTCCTGCCGGGAGCCGGTGAGGCATTCCACTCGTGACAAAGGTCATGAGGAAGGAGGCTCGGCATACGCAAAGGCGGGATCGAGCCTCAGGAGTCCCCCCGGATAGTCTCAAGCATTTACCCCCCAAAAAACCAGAGTCTGCCTACTTTATTGCTTTGTGCTCTCACCTCTGACTTTACTGGGAGCTGTCCCCTACCACCATCTTGCTCTCTCTGTCAAAGAGTTAACTTACAGCTCCAATTAATAAAGTTCCTGGGCAATTAGGAGTGTTTAAATCCAAACCCCTCAGATGGCTCTCTAACTCGCCTGACAAGTTTACCCGGACTCCTACAGCTATGCATACGATTGTTTACAGTCTCCCAGCCTCGAGAGGCATGGGAAGCTTAAGATATTCAA…	intergenic	gene-LOC112448791(dist=32312),gene-LOC616323(dist=9141)
11	49297663	49298963	AAATTGCATGCTGGGAGCCGGTGAGGCATTTCACTCGTGACAAAGGCCATGAGGAAGGAGGCTCGGCATACGCAAAGGCGGGATCGAGCCTCAGGAGTCCGCCCGGATATTCTCGAGCATTTTCCCCCAAAAAAACCAGAGTCTGCCTATTTTATTGCTTTGTGCTCTCACCTCTGACATTACTGGGAGCTGTCCCCTACCACCATCTCTCTCTCTCTGTCAAAGAGTTAACTTACAGCTCCAATTAATAAAGTTCCTGGGCAATTAGGAGTGTTTAAATCCAAACCCCTCAGATGGCTCTCTAACTCATCTGACAAGTTTACCCGGACTCCTACAGCTATGCATACGATTGTTTACAGTCTCCCAGCCTCAAGAGGCACGGGAAGCTTAAGATATTCA…	A	intergenic	gene-LOC112448791(dist=36732),gene-LOC616323(dist=3421)
11	50622215	50622215	C	CACTTCTTGCCGGGAGCCGGCATATTGCATATTGAGTGCATATTGCATATTGAGTGCATATTGCATATTGCATATTGAGTGCAGCACTTTCCACAGCATCACCTTTCAGGATCTGGAATAGCTCAACTGGAATTCTATCACTGCCGGGAGCCAGCGTGAGGAACTCTGCCCATAACAAAGGTCATGAGGAAGGAGGCTCGGCATACGCAAAGGCGGGATCGAGCCTCAGGAGTCCCCCATCTACCTCCAAAACCAGAGTCTGCCTACTTTCTGCTTTGTGCTTTCACCTACACCTCTGACTTTATGGGGGGCTGTCCCCCACTACGTCTCTGAAAAAAGAGTTAGCTTACAGCTCCAGTTAATAATTCCTGGGTGTGACAGTGTTTCAACCTACAAACT…	intergenic	gene-SUCLG1(dist=70804),NONE(dist=NONE)
11	50622215	50622215	C	CACTTCTTGCCGGGAGCCGGCATATTGCATATTGAGTGCATATTGCATATTGAGTGCATATTGCATATTGCATATTGAGTGCAGCACTTTCCACAGCATCATCTTTCAGGATCTGGAATAGCTCAACTGGAATTCTATCACTGCCGGGAGCCAGCGTGAGGAACTCTGCCCATGACAAAGGTCATGAGGAAGGAGGCTTGGCATACGCAAAGGCGGGATCGAGCCTCAGGAGTCCCCCATCTACCTCCAAAACCAGAGTCTGCCTACTTTCTGCTTTGTGCTTTCACCTACACCTCTGACTTTATGGGGGGCTGTCCCCCACTACGTCTCTGAAAAAAGAGTTAGCTTACAGCTCCAGTTAATAATTCCTGGGTGTGACAGTGTTTCAACCTACAAACT…	intergenic	gene-SUCLG1(dist=70804),NONE(dist=NONE)
11	51996768	51996768	T	TAGATGGTGCTGGGGACCAGCCCCAGCTGATCCAGGGTATTCGAAGGAGAGACAGCCTAGGCGACTATTTATATGCTAATTAGAGATATAAAGAATAATAGAATGAGGATAGCTCAGTAGGAAAATTCAGTGGAGAAAAGAGGCTGAGTAGCTTGGTTTACGCGGGAGACCAATAAAACTTCAAGACAAGAAGTTTGCACCACTTACGTAGGCCGCAGGCGCCCTCTCGAATAGCGGAAGGTGCCTCACCCTAGACACCTTCTCGAGTGGGTCTTAGAAGCCCAGGCATAATTAGTAAGCGTGGTGGGTTCCGCGCTCCAGATGGAGACTCAGCTGGAAGTTAAAGGGAAGAATGACATGGGGAGACCAAGCGTTGGTGAACAAGGCCCGCAGCTTTAT…	intergenic	gene-SUCLG1(dist=1445357),NONE(dist=NONE)
11	58501181	58502476	TCTTACCTGCTGGGGACCAGCCCCAGCTGATCCAGGGTATTCGAAGGAGAGACGGCCTAGGCGACTATTTATATGCTAATTAGAGATATAGAGAACAATAGAATGAGGATAGCTCAGTAGGAAAATTCAGCGGAGAAAAGAAGCTGAGTAGCTTGGTTTACGCGGGAGACCAATAAAACTTCAAGACAAGAAGTTTGCACCACTTACGTAGGCCGCAGGCGCCCTCTCGAATAGTGGAAGGTGTCTCACCCTAGACTCCTTCTCGAGTGGGTCTTAGAAGCCCAGGCATAATTAGTAAGCGTGGTGGGTTCCGCGCTGCAGATGGAGACTCAGCTGGAAGTTAAAGGGAAGAATGACATGGGGAGACCAAGCGCTGGTGAACAAGGCCCGTAGCTTTAT…	T	intergenic	gene-TRNAC-GCA-143(dist=1310840),gene-LRRTM4(dist=7192)
11	68976298	68976298	G	GTCCAGTTGCCGGGGACCAGCCCCGGCTGATCCAGGGTATTCGAAGCGGGGACGGCGTCGGCGAGGATCAGGAAACAACTGCTTAATTAAACGTTAATTAAGGATATAAAGAGTAATAGAATGAGGATAGCTCAGTGAAGAAATTCAGTGAAGAAAAGAGGCTGAAATAAGGATAGCTCAGTGAGGAAATTCAGTGGAGAAAAGAGGCTGAATAATTCAGCCAGAAGGTAAGAGAAAGAACGACATGGTGAGACCAAGTTTCGGTGAACAAGGCCCGCACTTTATTTTTCAAAGTAGTTTTTATACCTTAAGTTATGCACAGAGGATAATGGGGGAAGGGGTAGAGTCTTGCAGCAAACCAGGCTTTCTTCCTGCAAACTTATCATATGCAAAAGCTTA…	intronic	gene-GALNT14
11	70170980	70170980	A	AAAGTTACTGCCGGGGTCCTGCCCCGGCTGATCCAGGGTATTCGAAGCGGGGACGGCGTCGGCGACCTATTTATTTATTTAAATATTTTATCAAAGATATAAAGAGTAATAGGATGAGGATAGCTCAGTAGGAAAATTCAGTGGAGAAAAGAGGCTGAGTGGCTTGGTTTACGCGGGAGACCAATAAAACTTCAAGACAAGAAGTTTGCACCACTTACGTAGGCCGCAGGCGTCCTTCCGTTCTCCCGAAGGAGAGGAGACACTGAGGCCTCCCCGGTCGGATCTTAGAAGCCCAGGCATAATTAGTAAGCATGGTGGGTTCCGCGCTCCAGATGGAGACTCAACCAGAGTGAGAGAGAGAGCGACATGGGGAGACCAGTATTTCGAGAAACTGATCCC…	intronic	gene-ALK
11	77309057	77309057	T	TTCTCTGCAGCAGCCCCGTTGGTCCCGCCGGGATCTCGATGTTTATCTTGCCTCCCCTTCTGGCGGGCTCCTCTTTTGTGATCGAAGCTATGGGGGAACTGGATGTCTGGGGGTCTGCAACATGGCGAATCAACCTGTCTTGGATCTAAATTGGAGAATCTGCATCCTGTGGAAAAATACAAGCACATCCTCGACCGCTAGTTAATAATGGGTCAGGACCCTTCCATTGTCCTGAGAGGAGGTCCTTCCATTTGACTAATGGTTTTGCATTTAATTGCTCCAGGCATCAATGACGAAGCATTGCAGTAGTTCCAGCCAGATCAGTATTTAGAATATTTATTACGAAAAGAGCAAATATTTATTACGAAAAGAGCAAATATTTATTATGAAAAGAGCATG…	intergenic	gene-LOC112448894(dist=1734995),gene-MIR2285AF-1(dist=89040)
11	80415237	80415237	A	AGCCTCTTTTCTCCACTGAATTTCCTCACTGAGCTATCCTTATTTCAGCTCTTTTCTCCACTGAATTTCCTCACTGAGCTATCCTTATTTCG	intergenic	gene-RDH14(dist=249736),gene-KCNS3(dist=280340)
11	81240342	81241565	GATAACCTGCCGGGAGCCGGCATATTGCATATTGAGTGCATATTGCATATTGAGTGCAGCACTTTTCAGTATCTGATATAGCTCAACTGGAATTCTATAACTACTGGGAGCATGAGGAACTCCGCCCATGACAAAGGTCATGAGGAAGGAGGCTCGGCATACCCAAAGGCGGGATCGAGCTTCAGGAGTCCCCCTGGAAATTCTCGAGCATATACCCTCAAAACCAGAGTCTGCCTACTTTCTGCTTTGTGCTTTCACCTACACCTCTGACTTTACGGGGGGCTGTCCCCCACTACCTCTCTGAAAAAAGAGTTAGCTTACAGCTCCAGTTAATAATTCCTGGGTGTGACAGTGTTTAACCTACAAACTCCTTTGGAAATCCTCTAGCCTGCCTGAATA…	G	intergenic	gene-TRNAC-GCA-146(dist=100393),gene-FAM49A(dist=544556)
11	83614694	83614694	A	ATTGCGGGGAGCCGGTGAGGCATTCCACTCATGACAAAGGTCATGAGGAAGGAGGCTCGGCATACGCAAAGGCGGGATCGAGCCTCAGGAGTCCCCCCGGATATTCTCGAGCATTTTCCCCCAAAAAACCAGAGTCTGCCTACTTTATTGCTTTGTGCTCTCACCTCTGACTTTACTAGGGGCTGTCCCCTACCACCATCTCACTCTCTCTCTGTCAAAGAGTTAACTTACAGCTCCAATTAATAAAGTTCCTGGGCAATTAGGAGTGTTTAAATCCAAACCCCTCAGATGGCTCTCTAACTTGCCTGACAAGTTTACCCGGACTCCTGCAGCTATGCATACGATTGTTTACAGTCTCCTAGCCTCCAGAGGCACGGGAAGCTTAAGATATTCAAATAG…	intergenic	gene-TRNAC-ACA-56(dist=122229),gene-FAM84A(dist=56128)
11	86261602	86262730	GGGTTGGTGCTGGGAGCAAGCTCCGCCCGTGGCAAAGGTCATGAGGAAGGAGGCTTGGCATATGCAAAGGTGGGATCGAGCCTCAGGAGTTCCCCTGGAAATTCTTGAGCATCTACCCCCCAAACCAGAGTCTGCCTACTTTCTGCTTTGTGCTTTCACCTACACCTCTGACTTTACGGGGGGCTGTCCCCCACTACCTCTCTCTGAAAAAAGAGTTAGCTTACAGCTCCAGTTAATAATTCCTGGGTGTGACAGTGTTTCAACCTACAAACTCCTTTGGAAGTCCTCTAGCCTGCCTGAATAGGTTTTTCCGGCCACATGTGATTGCTCAGAGCCTCCCAACTGTGAGAGGCATGAGATGTTCTAAACTGTCTAAATACAGATTCCTTTGAGCAGTTA…	G	intronic	gene-GREB1
11	89318045	89318045	G	GGAATTTTGCCAGGGACCAGCCCCGGCTGATCCAGGGTATTCGAAGGAGAGACGGCGTAGGCGAAGATCAGGAGACAATTGCTTAATTAAACGTTAATTAAGGATATAAAGAGTAATAGAATGAGGATAGCTCAGTAAAATTCAGTGAAGAAAAGAGGCTGAAATAAGGATAGCTCAGTGAGGAAATTCAGTGTAGAAAAGAGGCTGAATAATTCAGCCAGAAGGTAAGAGAAAGAACGACATGGTGAGACCAAGTTTCGGTGAACAAGGCCCGCACTTTATTTTCCAAAGTAGTTTTTATACCTTAAGTTATGCATAGAGGATAATGGGGGAAGGGGTAGAGTCTTGCAGCAAACCAGGCTTTCTTCCTGCAAACTTATCATATGCAAAAGCTTAGGT…	intergenic	gene-LOC107132953(dist=192373),gene-TRNAC-ACA-57(dist=21315)
11	93463646	93463646	G	GCTCCAGCCCACCCAGCCCTGCCAGCGTGGTGGCTCCAGGCACAACGTGGTTCAAGGAGAGCCAATTGCCAGTGTTCAACCTGGACTACCCTCAGGTGCAGATCCCCTTCGAGATCACCCTGTGGAACCTCCTGGCCTCCATAGCCAAGATGGATTGCTGTCCACTATAACATTAGAAATAGTACAATCAGAAGTGAGAAAATGCATATTTGGCCAATGTGAATGATCCAGGTTTATGCTTTCGAATTGTGACGTTGGAGAAGATCTTGAGAGGCCCCTGCACTGCAAGGAGATCAAGTCAGTCAAGCCTAAAAGAAATTAACCTTGAATATTCATTGGAAGGGCTGATGCTGAAGCCAAAATTCCAATACTTTGGCCACCTGATGGGAAGAGCTGACT…	intergenic	gene-LOC615170(dist=6776),gene-LOC510731(dist=1879)
11	93463646	93463646	G	GCTCCAGCCCGCCCAGACCCACCAGCGTGGTGGCTCCAGGCACAACGTGGTTCGAGGAGAGCCGACTGCCAGTGTTCAATCTGGACTACCCCCACGTGCAGATCCTCTTCCAGATCACCCTGTGGAACCTCCTGGCCTCCCTAGCCAAGATGGATTGCTGTCCACTGTAACCTCAGAAATAGTACAATCAGAAGTGAGAAAATGCATATTTGGCCATGTTGAATGATCCAGGTTTATGCTTTCGAATTGTGATGTTGGAGAAGATCTTGAGAGGCCCCTGCACTGCAAGGAGATCAAGTCAGTCAAGCCTAAAAGAAATTAACCTTGAATATTCATTGGAAGGGCTGATGCTGAAGCCAAAACTCCAATACTTTGGCCATCTGATGGGAAGAGCTGACT…	intergenic	gene-LOC615170(dist=6776),gene-LOC510731(dist=1879)
11	93463646	93463646	G	GCTCCAGCCCGCCCAGCCCCACCAGCGTGGTGGCTCTAGGCACAACGTGGTTCGAGGAGAGCCGACTGCCAGTGTTCAACCTGGACTACCCCCACGTGCAGATCCTCTTCCAGATCACCCTGTGGAACCTCCTGGCCTTCCTAGCCAAGATGGATTGCTGTCCACTGTAACCTCAGAAATAGTACAATCAGAAGTGAGAAAATGCATATTTGGCCATGTTGAATGATCCAGGTTTATGCTTTCGAATTGTGATGTTGGAGAAGATCTTGAGAGGCCCCTGCACTGCAAGGAGATCAAGTCAGTCAAGCCTAAAAGAAATTAACCTTGAATATTCATTGGAAGGGCTGATGCTGAAGCCAAAACTCCAATACTTTGGCCACCTGATGGGAAGAGCTGACT…	intergenic	gene-LOC615170(dist=6776),gene-LOC510731(dist=1879)
11	93589681	93590830	GTGCGGGGAGCGAGCTCCGCCTCTGGCAAAGGTCATGAGGAAGGAGGCTTGGCATACGCAAAGGCGGGATCAAGCCTCAGGAGTCTCCCTGGAAATTCTCGAGCAATCTACCCCCAAAACCAGAGTCTGCCTACTTTCTGCTTTGTGCTTTCACCTACACCTCTGACTTTATGGGGGGCTGTCCCCCACTACCTCTCTGAAAAAAGTTAGCTTACAGCTCCAGTTAATAATTCCTGGGTGTGACAGTGTTTAACTTACAAACTCCTTTGGAAATCCTCTAGCCTGCCTGAATAGGTTTTTCCGGCCTCATGTGATTGTTCAGAGCCTCCCAATTGTGAGAGGCAGGAGATGTTCTAAACTGTCTAAACACAGATTCTTTTGAGTAGTTAAAAGATTGAT…	G	downstream	gene-OR1J1
11	93859232	93859232	T	TGAATATTGCGGGGAGCCGGTGAGGCATTCCACTCGTGACAAAGGTCATGAGGAAGGAGGCTCGGCATACGCAAAGGCGGGATCGAGCCTCAGGAGTCCCCCCGGATATTCTCGAGCATTTTCCCCCAAAAAACCAGAGTCTGCCTACTTTATTGCTTTGTGCTCTCACCTCTGACTTTACTGGGGGCTGTCCCCTACCACCATCTCGCTCTCTCTCTGTCAAAGAGTTAACTTACAGCTCCAATTAATAAAGTTCCTGGGCAATTAGGAGTGTTTGAATCCAAACCCCTCTGATGGCTCTCTAACTCGCCTGACAAGTTTACCCGGACTCCTGCAGCTATGCATACGATTGTTTACAGTCTCCCAGCCTCGAGAGGCATGGGAAGCTTAAGATATTCA…	intergenic	gene-LOC786689(dist=1443),gene-OR1L6(dist=11809)
11	101000000	101348200	CTCTTTTTGTTGGGGGCCAGAGTGAGGTACTCCGCCCATGGCAAAGGTCATGAGGAAGGAGGCTCGACATACGCAAAGGCGGGATCGAGCCTCAGGAGTCCCCCTGGAACTCCTCGAGCATCTACCCCCATAACCAGAGCCTGCCTACTTTACTACTTTGTGCTCTTACCTACACCTCTGACTTTACGGGGGGCTGTCCCCCACCACCTCTTTCGGAGAAGGAGTTAACCTAGAGCTCCAGTCAATAAAAACTCTTGGGTGTGACAAGAGTGTTTTAACCTACAAACTCCTCTGAAGGTTCTCTAGCCTGCCTGACAGGCTCGTCCAGCCACATGTGATTGCTCACAGCCTCCTAACCGTGAGAGGCACAAGATGCTTTAAACCCTCTAAAAACAGGTT…	C	intronic	gene-NUP214
11	101000000	101347191	CATACGCAAAGGCGGGATCGAGCCTCAGGAGTCCCCCTGGAACTCCTCGAGCATCTACCCCCATAACCAGAGCCTGCCTACTTTACTACTTTGTGCTCTTACCTACACCTCTGACTTTACGGGGGGCTGTCCCCCACCACCTCTTTCGGAGAAGGAGTTAACCTAGAGCTCCAGTCAATAAAAACTCTTGGGTGTGACAAGAGTGTTTTAACCTACAAA	CTC	intronic	gene-NUP214
11	102000000	102145607	CCCAGGGTGCCGGGAGCCGGCATATTGCATATTGAGTGCATATTGCATATTGAGTGCAGCACTTTTCAGGATCTGGAATAGCTCAACTGGAATTCTATCACTGCCGATAGCCAGCGTGAGGAACTCCGCCCATGACAAAGGTCATGAGGAAGGAGGCTAGGCATACGCAAAGGCGGGATCGAGCTTCAGGAGTCCCCCTGGAAATTCTCGAGCATATACCCCCAAAACCAGAGTCTGCCTACTTTCTGCTTTGTGCTTTCACCTACACCTCTGACTTTACGGGGGGCTGTCCCCCACTACCTCTCTGAAAAAAGAGTTAGCTTACAGCTCCAGTTAATAATTCCTGGGTGTGACAGTGTTTAACCTACAAACTCCTTTGGAAATCCTCTAGCCTGCCTG…	C	intronic	gene-MED27
11	104000000	103732721	T	TGGGCACTGCTGGGAGCCGGCATATTGCATATTGAGTGCAGCACTTTCCACAGCATCATCTTTCAGGATCTGGAATAGCTCAACTGGAATTCTATCACTGCCAGTAGCCAGCGTGAGGAACTCCGCCCATGACAAAGGTCCTGAGGAAGGAGGCTCGGCATACGCAAAGGCGGGATCGAGCCTTAGGAGTCCCCCATCTACCCCCAAAACCAGAGTCTGCCTACTTTCTGCTTTGTGCTTTCACCTACACCTCTGACTTTACGGGGGGCTGTCCCCCACTACCTCTCTGAAAAAAGTTAGCTTACAGCTCCAGTTAATAATTCCTGGGTGTGACAGTGTTTAACCTACAAACTCCTTTGGAAGTCCTCTAGCCTGCCTGAATAGGTTTTTCTGGCCACA…	intronic	gene-LOC787891
11	105000000	104790601	TAGATTTATGCGGGGAGCCGGTGAGGCATTCCACTCGTGACAAAGGTTATGAGGAAGGAGGCTCGGCATACGCAAAGGCGGGATCGAGCCTCAGGAGTCCCCCCGGATATTCTCGAGCATTTTCCCCCAAAAAACCAGAGTCTGCCTACTTTATTGCTTTGTGCTCTCACCTCTGACTTTACTGGGGGCTGTCCCCTACCACCATCTCTCTCTCTGTGTGTCAAAGAGTTAACTTACAGCTCCAATTAATAAAGTTCCTGGGCAATTAGGAGTGTTTAAATCCAAACCCCTCTGATGGCTCTCTAACTCGCCTGACAAGTTTACCCGGACTTCTGCAGCTATGCATACGATTGTTTACAGTCTCCCAGGAGAGGCATGGGAAGCTTAAGATATTCAAAT…	T	intergenic	gene-VAV2(dist=11286),gene-BRD3OS(dist=7623)
12	1843266	1844565	GGAAAGTTGCCGGGGTCCAGCCCCGGCTGATCCAGGGTATTCGAAGGGGAGACAGCGTCGGCGACTATTTATATGCTAATTAGAGATATAGAGAACAATAGAATGAGGATAGCTCAGTAGGAAAATTCAGTGGAGAAAAGAAGCTGAGTAGCTTGGTTTACGCGGGAGACCAATAAAACTTCAAGACAAGAAGTTTGCACCACTTACGTAGGCCGCAGGCGCCCTCTCGAATAGCAGAAGGTGCCTCACCCTAGACACCTTCTCGAGTGGGTCTTAGAAGCCCAGGCATAATTAGTAAGCGTGGTGGGTTCCGCGCTCCAGATGGAGACTCAGCTGGAAGTTAAAGGGAAGAATGACATGGGGAGACCAAGCATTGGTGAGCAAGGCCCGTAGCTTTAT…	G	intergenic	gene-TDRD3(dist=29478),gene-DIAPH3(dist=336269)
12	4080964	4082808	AGCACTTTCATGGCGCCCGAACAGGGACTGAACACCACTTATGAAATGATGGTGGGAGAGGGAGAATATTGAGACACTAATAGTCAACTTAATTATTTACCTGGAGCCTACCCTCAGATTAGTGCTGCGGCTCTACAAGCATGGAAAAAGCTTCCAAATTCTGATAAAAAGACTGAAGATTTATCTAAAATTCTCCAGGGGCCAGATGAGCCATATCAGGATTTTGTTGCCCGCCTGCTTGATACAATTGGTAAAATGATAGGGGATGAGCAGGCGGGGATGGTGTTGACTAAACAGCTTGCTTATGAGAATGCCAATTCGGCTTGTCAAGCTGCCCTGAGACCTTACAGGAAAAAGGGAGGCTTATCTGACTATATACGGATTTGTGCTGATATCGGC…	A	intergenic	gene-DIAPH3(dist=1336517),gene-TRNAS-GGA-24(dist=961071)
12	5929140	5929501	TCTCTCTTACTCTGGCTGAGTCTCCATCTGGAGCACGGAACCCGCCATGCTTACTAATTATACCTGGGCTTCTAAGATCCGACCGGGGAGGCCTCAGTGTCTCCTCTCCTTCAGGAGAACGGAAGGACACCTGCAGACTACGTAAGTGGTGCAAGCTTCTTGTCTTGAAGTTTTTTTGGTCTCCCGCGTAAACCAAGCTACTCAGCCTCTTTTTTCCACTGAATTTTCCTACTGAGCTATCCTCATTCTATGACTCTTTATATCTTTAATTAATATCTAATTGAAGCTATTGTATCCTGATCCTCGCCGATGCCATCCCCGCTTCGAATACCCTGGATCAGCCGCGGCTGGACCCCAGCAGT	T	intergenic	gene-PCDH17(dist=705154),NONE(dist=NONE)
12	6378522	6387626	TATACATTGTTGGGGGCCAGAGTGAGGTACTCCGCCCATGGCAAAGGTCATGAGGAAGGAGGCTCGACATACGCAAAGGCGGGATCGAGCCTCAGGAGTCCCCCTGGAACTCCTCGAGCATCTACCCCCATAACCAGAGCCTGCCTACTTTACTACTTTGTGCTCACCTACACCTCTGACTTTACGGGGGGCTGTCCCCCACCACCTCTTTTGGAGAAGGAGTTAACTTAGAGCTCCAGTTTATAATAATTCCTGGGCGTGATAAGAGTGTTTTAACCTACAAACTCCTCTGAAGGTTCTCTAGCCTGCCTGATAGGCTCGTCCGGCCACATGTGATTGCTCACAGCCTCCCAACCGTGAGAGGCACAAGATGCTTTAAACCCTCTAAAAACGGGTTCT…	T	intergenic	gene-PCDH17(dist=1154536),NONE(dist=NONE)
12	6600291	6609386	TATTAGAGTGCCGGGGACCAGCCCCGGCTGATCCAGGGTATTCGAAGGAGAGACGGCATAGGCGAGGATCAGGATACGATAGCTTCAATTAGGTATTAATTAAAGATATAAAGAGTAATAGAATAAGGATAGCTCAGTAGGAAAATTCAGTGGAGAAAAGAGGCTGAGTAGCTTGGTTTACGCGGGAGACCAATAAAACTTCAAGACAAGAAGTTTGCACCACTTACGTAGGCCGCAGGCGTCCTTCCGTTCTCCCGAAGGAGAGGAGACACTGAGGCCTCCCCGGTCGGATCTTAGAAGCCCAGGCATAATTAGTAAGCATGGTGGGTTCCGCGCTCCAGATGGAGACTCAACCAGAGTGAGAGAGAGAGCGACATGGGGAGACCAGTATTTCGAGAA…	T	intergenic	gene-PCDH17(dist=1376305),NONE(dist=NONE)
12	8048141	8048141	T	TATTCTTTGTTGGGGGCCAGCGTGAGGTACTCTGCCCATGGCAAAGGTCATGAGGAAGGAGGCTCGACATACGCAAAGGCGGGATCAAGCCTCAGGAGTCCCCCTGGAAATTCTCGAGCATCTACCCCCATAACCAGAGCCTGCCTACTTTACTACTTTGTGCTCTCCCCTACACCTCTGACTTTACGGGGGGCTGTCCCCCACCACCTCTTTTGGAGAAGGAGTTAACTTAGAGCTCCAGTTAATAAAAACTTCTGGGCGTGACAAGAGTGTTTCAACCTACAAACTCCTCTGAAGGTTCTCTAGCCTGCCTGACAGGCTTGTCCGGCCACATGTGATTGCTCACAGCCTCCCAACCATGAGAGGCACGAGATGCTTTAAACCTTCTAAAAAACAGGT…	intergenic	NONE(dist=NONE),gene-LOC101905933(dist=992495)
12	12466210	12466211	GA	GGTGAACTGCCGGGAGCCGGCATATTGCATATTGAGTGCATATTGCATATTGAGTGCAGCACTTTTCAGGATCTGGAATAGCTCAACTGGAATTCTATCACTGCCGGTAGCCAGCGTGAGGAACTCCACCCATGACAAAGGTCATGAGGAAGGAGGCTTGGCATACGCAAAGGCGGGATCCAGCCTCAGGAGTCTCCCTGGAAATTCTCGAGCAATCTACCCCCCAAACCAGAGTCTGCCTACTTTCTGCTTTGTGCTTTCACCTACACCTCTGACTTTACGGGGGGCTGTCCCCCACTACCTCTCTGAAAAAAGAGTTAGCTTACAGCTCCAGTTAATAATTCCTGGGTGTGACAGTGTTTCAACCTACAAACTCCTTTGGAAATCCTCTAGCCTGCC…	intergenic	gene-AKAP11(dist=3706),gene-TNFSF11(dist=234920)
12	17781930	17781930	G	GATAGTTTGCTGGGGACCAGCCCCAGCTGATCCAGGGTATTCGAAGGAGAGACGGCCTAGGCGACTATTTACATGCTAATTAGAGATATAGAGAACAATAGAATGAGGATAGCTCAGTAGGAAAATTCAGTGGAGAAAAGAAGCTGAGTAGCTTGGTTTACGCGGGAGACCAATAAAACTTCAAGACAAGAAGTTTGCACCACTGACGTAGGCCGCAGGCGCCCTCTCGAATAGCGGAAGGTGTCTCACCCTAGACACCTTCTCGAGTGGGTCTTAGAAGCCCAGGCATGATTAGTCAGCGTGGTGGGTTCCGCGCTCCAGATGGAGACTCAGCTGGAAGTTAAAGGGAAGAATGACATGGGGAGACCAAGCGTTGGTGAGCAAGGCCCGTAGCTTTAT…	intergenic	gene-HTR2A(dist=939795),gene-SUCLA2(dist=27397)
12	38611967	38611967	T	TCACCACTGCCGGGGACCAGCCCCGGCTGATCCAGGGTATTCGAAGGAGAGACAGCATAGGCGAAGATCAGGAAACAATTGCTTAATTAAATGTTAATTAAGGATATAAAGAGTAATAGAATGAGGATAGTTCAGTAAAATTCAATGAAGAAAAGAGGCTGAAATAAGGATAGCTCAGTGAGGAAATTCAGTGGAGAAAAGAGGCTGAATAATTCAGCCAGAAGGTAAGAGAAAGAACGACATGGTGAGACCAAGTTTCGGTGAACAAGGCCCGTACTTTATTTTCCAAAGTAGTTTTTATACCTTAAGTTATGCATAGAGGATAATGGGGGAAGGGGTAGAGTCTTGCAGCAAGCCAGGCTTTCTTCCTGCAAACTTATCATATGCAAAAGCTTAGGT…	intergenic	gene-LOC781692(dist=1213524),gene-PCDH9(dist=848295)
12	54231798	54232918	CCCTGTCTGCCGAGGACCAGCCCCGGCTGATCCAGGGTATTCGAAGGAGAGACGGCGTAGGCGAAGATCAGGAAACAATTGCTTAATTAAACGTTAATTAAGGATATAAAGAGTAATAGAATGAGGATAGCTGAGTAAAATTCAGTGAAGAAAAGAGGCTGAAATAAGGATAGCTCAGTGAGGAAATTCAGTGGAGAAAAGAGGCTGAATAATTCAGCCAGAAGGTAAGAGAAAGAACGACATGGTGAGACCAAGTTTCGGTGAACAAGGCCCGTACTTTATTTTCCAAAGTAGTTTTTATACCTTAAGTTATGCATAGAGGATAATGGGGGAAGGGGTAGAGTCAGGCAGCAAGCCAGGCTTTCTTCCTGCAAACTTAGCATATGCAAAAGTTAGGTG…	C	intergenic	gene-RNF219(dist=430552),gene-RBM26(dist=191737)
12	55435695	55435695	T	TATTTATCTGCCGGGAGCCGGCATATTGCATATTGAGTGCATATTGCATATTGAGTGCAGCACTTTTCAGGATCTGGAATAGCTCAACTGGAATTCTATCACTGCCGGTAGCCAGCGTGAGGAACTCCGCCCATGACAAAGGTCATGAGGAAGGAGGCTCGGCATACGCAAAGGCGGGATCGAGCTTCAGGAGTCCCCCTGGAAATTCTCGAGCATATACCCCCAAAACCAGAATCTGCCTACTTTCTGCTTTGTGCTTTCACCTACACCTCTGACTTTACGGGGGGCTGTCCCCCACTACCTCTCTGAAAAAAGTTAGCTTACAGCTCCAGTTAATAATTCCTGGGTGTGACAGTGTTTAACCTACAAACTCCTTTGGAAATCCTCTAGCCTGCCTGA…	intergenic	gene-TRNAG-UCC-29(dist=38933),gene-MIR1256(dist=1741968)
12	56107379	56107457	ATACCCTGGATCAGCCGGGGCTGGTCCCCGGCACTGAACTACTTTAAAAACACAGTGATTTACTGCTATCTAGGGATAC	A	intergenic	gene-TRNAG-UCC-29(dist=710617),gene-MIR1256(dist=1070206)
12	61568102	61568102	G	GATAACTTGCGGGGAGCCGGTGAGGCATTCCACTCGTGACAAAGGTCATGAGGAAGGAGGCTCAGCATACGCAAAGGCGGGATCGAGCCTCAGGAGTCCCCCCGGATATTCTCGAGCATTTTCCCCCAAAAAACCAGAGTCTGCCTACTTTATTGCTTTGTGCTCTCACCTCTGACTTTACTGGGGGCTGTCCCCTACCACCATCTCGCTCTCTCTCTGTCAAAGAGTTAACTTACAGCTCCAATTAATAAAGTTCCTGGGCAATTAGGAGTGTTTAAATCCAAACCCCTCTGATGGCTCTCTAACTCGCCTGACAAGTTTACCCGGACTCCTGCAGCTATGCATACGATTGTTTACAGTCTCCCAGCCTCGAGAGGCATGGGAAGCTTAAGATATTCA…	intergenic	gene-SLITRK6(dist=865909),gene-SLITRK5(dist=724499)
12	64234151	64234151	G	GCCGGGAGCCGGCATATTGCATATTGAGTGCAGCACTTTCCACAGCATCATCTTTCAGGATCTGGAATAGCTCAACTGGAATTCTATCACTGCCGGTAGCCAGTGTGAGGAATTCCGCCCATGGAAGGAGGTTTGGCATACGCAAAGGCGGGATCGAGCTTCAGGAGTCCCCCTGGAAATTCTCGAGCATATACCCCCAAAACCAGCGTCTGCCTACTTTCTGCTTTGAGCTTTCACCTACACCTCTGACTTTACGGGGGGCTGTCCCCAACTACCTCTCTCTGAAAAAAGAGTTAGCTTACAGTTCCAGTTAATAATTCCTGGGTGTGACAGTGTTTAACCTACAAACTCCTTTGGAAATCCTCTAGCCTGCCTGAATAGGTTTTTCCGGCCACATGT…	intergenic	gene-SLITRK5(dist=1932268),gene-LOC112449108(dist=1451868)
12	64234151	64234151	G	GCCGGGAGCCGGCATATTGCATATTGAGTGCATATTGCATATTGAGTGCAGCACTTTCCACAGCATCATCTTTCAGGATCTGGAATAGCTCAACTGGAATTCTATCACTGCCGGTAGCCAGTGTGAGGAACTCCGCCCATGGAAGGAGGCTCAGCATACGCAAAGGCAGGATCGAGCTTCAGGAGTCCCCCTGGAAATTCTGGATGATATACCCCCAAAACCAGAGTCTGCCTACTTTCTGCTTTGAGCTTTCACCTACACCTCTGACTTTACGGGGGGCTGTCCCCAACTACCTCTCTCTGAAAAAAGAGTTAGCTTACAGTTCCAGTTAATAATTCCTGGGTGTGACAGTGTTTAACCTACAAACTCCTTTGGAAATCCTCTAGCCTGCCTGAATAG…	intergenic	gene-SLITRK5(dist=1932268),gene-LOC112449108(dist=1451868)
12	64301082	64302013	ACTGCCGAGGACCAGCCCCGGCTGATCCAGGGTATTCGAAGGGGAGACGGCGTCGGCGACCTATTCAAATGGTAATTAGAGATATAAAGAGTAATAGAATGAGGATAGCTCAGTAGGAAAATTCAGTGGAGAAAAGAGGCTAAGTAGCTCGGTTTACGCGGAAAATCAATATAACCCGTGACACCAGGTTAGCTCTGACCACAGAGGCCGCAGGCGCCCTCTCGAATAGAGGAAGGTGCCCCACCTTAGACACCTTCTCGAGTGGGTCTTAGAAGCCCAGGCAAATAAGTGGTCACAGAGGATATCCATGCTCCAGATGGAGACTTCAGCCAGAAGTTAAAGGAAAGAATGACATGGGGAGACCAAGCATTGGTGAGCAAGGCCCGTAGCTTTATTTTT…	A	intergenic	gene-SLITRK5(dist=1999199),gene-LOC112449108(dist=1384006)
12	64302013	64302013	C	CTTGAGGCTGGGAGACTGTAAACAATCGTATGCATAGCTGTAGGAGTCAGGGTAAACTTGTCAGGCGAGTTAGAGAGCCATCTGAGGGGTTTGGATTTAAACACTCCTAATTGCCCAGGAACTTTATTAATTGGAGCTGTAAGTTAACTCTTTGACAGAGCGAGATGGTGGTAGGGGACAGCCCCTAGTAAAGTCAGAGGTGAGAGCACAAAGCAATAAAGTAGGCAGACTCTGGTTTTTTGGGGGAGGATACTCGAGAATATCCGGGCGGACTCCTGAGGCTCGATCCCGCCTTTGCGTATGCCGAGCCCCCTTCCTCATGACCTTTGTCACGAGCGGAATGCCTCACCGGCTCCCGGCATTCCA	intergenic	gene-SLITRK5(dist=2000130),gene-LOC112449108(dist=1384006)
12	69753318	69754297	GCCGCGAGCCAGCGTGAGCCAGCGTGAGGAACTCTGCCCGTGGCAAAGGTCATGAGGAAGGAGGCTCGGCATTCGCAAAGGCGGGATCGAGCCTCAGGAGTCCCCCTGGAAATTCTCGAGCATCTACCCCCAAAACCAGAGTCTGCCTACTTTACTGCTTTGTGCTCTCACCTACACCTCTGACTTTATGGGGGGGCGGGGGGGGGGCTGTCCTGGGCGTGACAAGAGTGTTTTATTTCACAACTGTGAGAGGCATGAGATGTTCTAAACTGTCTGAATACAGATTCCTTTGAGCAGTTAGAATATTGATTAGAAATTGTATTGGTAAAGGGTTTTTCACTTGTTGGGCCAATGTTTGCTACTAAGTTTCCATATCCCTTACCTGCTGTGTCCCGGGCA…	G	intergenic	gene-LOC515333(dist=80008),gene-LOC104973089(dist=38423)
12	70492038	70492038	A	AAGACTCCTGCCGGGGACCAGCCCCGGCTGATCCAGGGTATTCGAAGGAGAGACGGCATAGGCGAGGATCAGGATACAATAGCTTCAATTAGATATTAATTAAAGATATAAAGAGTAATAGAATAAGGATAGCTCAGTAGGAAAATTCAGTGGAGAAAAGAGGCTGAGTAGCTTGGTTTACGCGGGAGACCAATAAAACTTCAAGACAAGAAGTTTGCACCACTTACATAGGCCGCAGGCGTCCTTCCGTTCTCCCGAAGGAGAGGAGACACTGAGGCCTCCCCGGTCGGACCTTAGAAGCCCAGGCATAATTAGTAAGCATGGTGGGTTCCGCGCTCCAGATGGAGACTCAGCCAGAGTGAGAGAGAGAGCGACATGGGGAGACCAGTATTTCGAGAA…	intergenic	gene-LOC107131272(dist=24539),gene-LOC101906567(dist=135280)
12	73678908	73679388	CAATGGATGCCGGAGCCAGCCGGCAAAGTCGATCAGGTCCCGAGAACGTGCACGGCGGGGCTAAGAAAGGAACTAAAGCAAGAGACTACAAAGATGGGGTCGAGAGGTTCAGACACGTCACCACGAAGGGACGCAGTCTGACACCAACTTTATTCAACATCTCATATTTATACAGAAAAGCGTGAGAGAGACAAAACAGTTGACCTTTTTTTCTTGGTTAGCCTATACATCTTACAAACAGTCACAAGAAATCTTGAGAGCATGGGAATGGCTCCCTGTTATTATTTCTTACACCAGATAACATTTCTCTGTGCGTGAGAAGTTTGCACAGAACTCCAGGTGCCTGCAGTAAATAAGCGCCTAATCTCTGGGGTGGCGGGACAGAGAGCTATGTTTGCA…	C	intronic	gene-HS6ST3
12	75638410	75638410	A	AAGTCTATTGTTGGGGGCCAGAGTGAGGTACTCCGCCCGTGACAAAGGTCATGAGGAAGGAGGCTCGACATACGCAAAGGCGGGATCGAGCCTCAGGAGTCCCCCTGGAACTCCTCGAGCATCTACCCCCATAACCAGAGCCTGCCTACTTTACTACTTTGTGCTCACCTACACCTCTGACTTTACGGGGGGCTGTCCCCCACCACCTCTTTCGGAGAAGGAGTTAACCTAGAGCTCCAGTCAATAAAAACTCTTGGGTGTGACAAGAGTGTTTTAACCTACAAACTCCTCTGAAGGTTCTCTGGCCTGCCTGACAGGCTTGTCCGGCCACATGTGATCGCTCACAGCCTCCCAACCGTGAGAGGCACAAGATGCTTTAAACCTTCTAAAAACAGGTTC…	intronic	gene-SLC15A1
12	77834073	77834552	TGGGAGGTGCCGGAGCCAGCCGGCAAAGTCGATCAGGTCCCGAGAACGTGCACGGCGGGGCTAAGAAAGAAACTAAAGCAAGAGACTACAAAGATGGGGTCGAGAGGTTCAGACACGTCACCACGAAGGGACGCAGTCTGACACCAACTTTATTCAACATCTCATATTTATACAGAAAAGCGTGAGAGAGACAAAACAGTTGACATTTTTTCTTGGTTAGCCTATACATCTTACAAACAGTCACAAGAAATCTTGAGAGCATGGGAATGGCTCCCTGTTATTATTTCTTAAACCAGATAACATTTCTCTGTGCATGAGAAGTTTGCATAGAACTCCAGGTGCCTGCAGTAAATAAGCGCCTAATCTCTGGGGTGGCGGGACAGAGAGCTATGTTTGCAA…	T	intronic	gene-NALCN
12	77985541	77987877	TTAAACTTTCTTTTCTTTTTTTTTTTCTAATTTTATTTTATTTTTAAACTTTACATAATTGTATTAGTTTTGCCAAATATCAAAATGAATCCGCCACAGGTATACATGTGTTCCCCATCCCGAACCCTCCTCCCTCCTCCCTCCCCATACCATCCCTCTGGGCCGTCCCAGTGCACCAGCCCCAAGCATCCAGCATCGTGCATCGAACCTGGACTGGCAACTCGTTTCCTACATGATATTTTACATGTTTCATTGCCATTCTCCCAAATCTTCCCACCCTCTCCTTCTCCCACAGAGTCCATAAGACTGTTCTATACATCAGTGTCTCTTTTGCTGTCTCGTATACAGAGTTATTGTTACCATCTTTCTAAATTCCATATATATGCGTTAGTATACTGT…	T	intronic	gene-ITGBL1
12	80729258	80729259	CG	CCATGGGTGTTGGGGGCCAGAGTGAGGTACTCCGCCCATGGCAAAGGTCATGAGGAAGGAGGCTCGACATACGCAAAGGCGGGATCGAGCCTCAGGAGTCCCCCTGGAAATCCTCGAGCGTCTACCCCATAACCAGAGCCTGCCTACTTTACTACTTTGTGCTCTTACCTACACCTCTGACTTTACGGGGGGCTGTCCCCCACCACCTCTTTCGGAGAAGGAGTTAACCTAGAGCTCCAGTCAATAAAAACTCTTGGGTGTGGCAAGAGTGTTTTAACCTACAAACTCCTCTGAAGGTTCTCTGGCCTGCCTGACAGGCTCGTCCGGCCACATGTGATTGCTCACAGCCTCCCAACCATGAGAGGCACGAGATGCTTTAAACCTTCTAAAAACAGGTTC…	intergenic	gene-TRNAF-GAA-6(dist=881076),gene-EFNB2(dist=1510105)
12	85158120	85158194	TCGTTCCCCCACGGAGCAGTTTGGGTCACCAGCCCTACTGCTCCTCCCTCGGAACAGTTTGGGCCATCAGCCTAC	T	intergenic	gene-COL4A2(dist=4092),gene-RAB20(dist=11899)
12	85505896	85506172	GTGGCCACTGCTGAGTTTTCCAAATTTGCTGGCATATTGAGTGCAGCACTTTCACAGCATCATCTTTCAGGATTTGAAATAGCTCAACTGGAATTCCATCACCTCCACTAGCTTTGTTTGTAGTGATGCTTTCTAAGGCCCACTTGACTTCACATTCCAGGATGTCTGGCTCTAGGTGAGTGATCACACCATCATGATTATCTTGGTCGTGAAGATCTTTTTTGTATAGTTCTTCTGTGTATTCCTGCCACCTCTTCTTCATAACCTCTGCTTCTGT	GGCCA	intronic	gene-ARHGEF7
13	1372044	1372114	CTTTGCGTATGTCAAGCCTCCTTCCTCATGACCTTTGTCACGGGCGGAGTACCTCACTCTGGCCCCCAACA	C	intronic	gene-PLCB1
13	3620055	3621239	CACCTTCTGCCGGGGACCAGCCCCGGCTGATCCAGGGTATTCGAAGCGGGGACTGCGTCGGCGAGGATCAGGAAACAACTGCTTAATTAAACGTTAATTAAGGATATAAAGAGTAATAGAATGAGGATAGCTCAGTGAAGAAATTCAGTGGAGAAAAGAGGCTGAATAATTCAGCCAGAAGGTAAGAGAAAGAACGACATGGTGAGACCAAGTTTCGGTGAACAAAGCCCGTACTTTATTTTCCAAAGTAGTTTTTATACCTTAAGTTATGCATAGAGGATAATGGGGGAAGGGGTAGAGTCTTGCAGCAAACCAGGCTTTCTTCCTGCAAACTTATCATATGCAAAAGCTTAGGTGATTTGCATTATCTTCTGGCCCGGAGGCCTGTGAACATTTTAA…	C	intergenic	gene-SNAP25(dist=58221),gene-MKKS(dist=62480)
13	8665202	8666412	TGCCGGGGACCAGCCCCGGCTGAACCAGGGTATTCGAAGGAGAGACGGCGTAGGCGAAGATCAGGAAACAATTGCTTAATTAAATGTTAATTAAGGATATAAAGAGTAATAGAATGAGGATAGCTCAGTAGGAAAATTCAGTGAAGAAAAGAGGCTGAAATAAGGATAGCTCAGTGAGGAAATTCAGTGGAGAAAAGAGGCTGAATAATTCAGCCAGAAGGTAAGAGAAAGAACGACATGGTGAGACCAAGTTTCGGTGAACAAGGCCCGCACTTTATTTTTCAAAGTAGTTTTTATACCTTAAGTTATGCACAGAGGATAATGGGGGAAGGGGTAGAGTCTTGCAGCAAACCAGGCTTTCTTCCTGCAAACTTATCATATGCAAAAGCTTAGGTGATT…	T	intronic	gene-MACROD2
13	9738090	9746576	GATGCCGGGGACCAGCCCCGGCTGATCCAGGGAATTCGAAGCGGGGACGGCGTCGGCGAAGATCAGGAAACAATTGCTTAATTAAACGTTAATTAAGGATATAAAGAGTAATAGAATGAGGATAGCTCAGTAGGAAAATTCAGTGGAGAAAAGAGGCTGAAATAAGGATAGCTCAGTGAGGAAATTCAGTGTAGAAAAGAGGCTGAATAATTCAGCCAGAAGGTAAGAGAAAGAACGACATGGTGAGACCAAGTTTCGGTGAACAAGGCCCGCACTTTATTTTCCAAAGTAGTTTTTATACCTTAAGTTATGCATAGAGGATAATGGGGGAAGGGGTAGAGTCCTGCAGTAAGCCAGGCTTTCTTCCTGCAAACTTATCATATGCAAAAGTTTAGGTGA…	G	intronic	gene-MACROD2
13	10276970	10278253	CTGTTGGGGGCCAGAGTGAGGTACTCCGCCCATGACAAAGGTCATGAGGAAGGAGGCTCGACATACACAAAGGCGGGATTGAGCCTCAGGAGTCCCCCTGGAACTCCTCGAGCATCTACCCCCATAACCAGAGCCTGCCTACTTTACTACTTTGTGCTCTCACCTACATCTCTGACTTTACGGGGGGCTGTCCCCCACCACCTCTTTCGGAGAAGGAGTTAACCTAGAGCTCCAGTTAATAATAATTCCTGGGCGTGATAGGAGTGTTTCAACCTACAAACTCCTCTGAAGGTTCTCTAGCCTGCCTGACAGGCTCGTCCGGCCACATGTGATTGCTCACAGCCTCCCAACCGTGAGAGGCACGAGATGCTTTAAACCTTCTAAAAACAGGTTCCTTAG…	C	intronic	gene-KIF16B
13	12545226	12546449	CCCCAATTGCCGGGAGCCGGCATATTGCATATTGAGTGCATATTGCATATTGAGTGCAGCACTTTTCAGGATCTGGAATAGCTCAACTGGAATTCTATCACTGCCGGTAGCCAGCGTGAGGAACTCCGCCCATGACAAAGGTCATGAGGAAGGAGGCTCGGCATACGCAAAGGCGGGATCGAGCTTCAGGAGTCCCCCTGGAAATTCTCGAGCATATACCCCCAAAACCAGAATCTGCCTACTTTCTGCTTTGTGCTTTCACCTACACCTCTGACTTTACGGGGGGCTGTCCCCCACTACCTCTCTGAAAAAAGTTAGCTTACAGCTCCAGTTAATAATTCCTGGGTGTGACAGTGTTTAACCTACAAACTCCTTTGGAAATCCTCTAGCCTGCCTGAA…	C	intergenic	gene-ECHDC3(dist=11706),gene-USP6NL(dist=21616)
13	19940484	19941593	TGTTGGGTGCCGGGGACCAGCCCCGGCTGATCCAGGGTATTCGAAGGAGAGACGGCATAGGCGAAGATCAGGAAACAATTGCTTAATTAAATGTTAATTAAGGATATAAAGAGTAATAGAATGAGGATAGCTCAGTAGGAAAATTCAGTGAAGAAAAGAGGCTGAAATAAGGATAGCTCAGTGAGGAAATTCAGTGGAGAAAAGAGGCTGAATAATTCAGCCAGAAGGTAAGAGAAAGAGCGACATGGTGAGACCAAGTTTCGGTGAACAAGGCCCGCACTTTATTTTCCAAAGTAGTTTTTATACCTTAAGTTATGCATAGAGGATAATGGGGGAAGGGGTAGAGTCAGGCAGCAAGCCAGGCTTTCTTCCTGCAAACTTATCATATGCAAAAGCTTA…	T	intergenic	gene-NRP1(dist=158295),gene-ITGB1(dist=29071)
13	20556488	20556967	GACCATCTGCCGGAGCCAGCCGGCAAAGTCGATCAGGTTCCGAGAACGTGCACGGCGGGGCTAAGAAAGAAACTAAAGCAAGAGACTACAAAGATGGGGTCGAGAGGTTCAGACACGTCACCACGAAGGGACGCAGTCTGACACCAACTTTATTCAACATCTCATATTTATACAGAAAAGCGTGAGAAAGACAAGAGAGTTGACATTTTTTCTTGGTTAGCCTATACATCTTACAAACAGTCACAAGAAATCTTGAGAGCATGGGAATGGCTCCCTGTTATTATTTCTTACACCAGATAACATTTCTCTGTGCGTGAGAAGTTTGCACAGAACTCCAGGTGCCTGCAGTAAATAAGCGCCTAATCTCTGGGGTGGCGGGACAGAGAGCTATGTTTGCAA…	G	intergenic	gene-ARL5B(dist=215768),gene-MALRD1(dist=91218)
13	20564883	20565934	GCTCCTCTGCCGGGGACCAGCCCCGGCTGATCCAGGGTATTCGAAGCGGGGACGGCGTCGGCGAAGATCAGGAAACAACTGCTTAATTAAACGTTAATTAAGGATATAAAGAGTAATGGAATAAGGATAGCTCAGTGAGGAAATTCAGTGGAGAAAAGAGGCTGAATAATTCAGCCAGAAGGTAAGAGAAAGAACGACATGGTGAGACCAAGTTTCGGTGAACAAGGCCCGCACTTTATTTTCCAAAGTAGTTTTTATACCTTAAGTTATGCATAGAGGATAATGGGGGAAGGGGTAGAGTCATGCAGTAAGCCAGGCTTTCTTCCTGCAAACTTATCATATGCAAAAGTTTAGGTGATTTGCATCATCTTCTGGCCCAGAGGCCTTTTTCTCTAAAGG…	G	intergenic	gene-ARL5B(dist=224163),gene-MALRD1(dist=82251)
13	21831485	21831485	G	GGGGAGATGTTGGGGGCCAGAGTGAGGTACTCCGCCCATGGCAAAGGTCATGAGGAAGGAGGCTCGACATACGCAAAGGCGGGATCGAGCCTCAGGAGTCCCCCTGGAAATCCTCGAGCATCTACCCCCATAACCAGAGCCTGCCTACTTTACTACTTTGTGCTCACCTACACCTCTGACTTTATGGGGGGCTGTCCCCAACCACCTCTTTTGGAGAAGGAGTTAACTTAGAGCTCCAGTTTATAATAATTCCTGGGCGTGATAAGAGTGTTTTAACCTACAAACTCCTCTGAAGGTTCTCTGGCCTGCCTGACAGGCTTGTCCGGCCACATGTGATCGCTCACAGCCTCCCAACCGTGAGAGGCACAAGATGCTTTAAACCTTCTAAAAACAGGTTCC…	intergenic	gene-PLXDC2(dist=89094),gene-NEBL(dist=262974)
13	21837553	21838856	GCCTCATTGCCGGGGACCAGCCCCGGCTGATCCAGGGTATTCGAAGGAGAGACGGCATAGGCGAAGATCAGGAGACAACTGCTTAATTAAATGTTAATTAAGGATATAAAGAGTAATAGGATGAGGATAGCTCAGTGAGGAAATTCAGTGGAGAAAAGAGGCTGAGTGGCTTGGTTTATGCGGGAGACCAATAAAACTTCAAGACAAGAAGTTTGCACCACTTACGTAGGCCACAGGCGTCCTTCCGTTCTCCCGAAGGACAGGAGACACTGAGGCCTCCCCGGTCGGATCTTAGAAGCCCAGGCATAATTAGTAAGCATGGTGGGTTCCGCGCTCCAGATGGAGACTCAGCCAGAGTGAGAGAGAGAGCGACATGGGGAGACCAGTATTTCGAGAAAC…	G	intergenic	gene-PLXDC2(dist=95162),gene-NEBL(dist=255603)
13	27702050	27703168	TGCCATCTGCGGGGAGCGAGCTCCGCCTCTGGCAAAGGTCATGAGGAAGGAGGCTTGGCATACACAAAGGCGGGATCAAGCCTCAGGAGTCTCCCTGGAAATTCTCGAGCATCTACCCCCAAAACCAGAGTCTGCCTACTTTCTGCTTTGTGCTTTCACCTACACCTCTGACTTTACGGGGGGCTGTCCCCCACTACCTCTCTGAAAAAAGAGTTAGCTTACAGCTCCAGTTAATAATTCCTGGGTGTGACAGTGTTTAACCTACAAACTCCTTTGGAAATCCTCTAGCCTGCCTGAATAGGTTTTTCCGGCCACATGTGATTGTTCAGAGCCTCCCAACTGTGAGAGGCAGGAGATGTTCTAAACTGTCTAAACACAGATTCGAGTAGTTAAAAGATT…	T	intergenic	gene-TRNAE-UUC-64(dist=770305),gene-OPTN(dist=97569)
13	42504226	42505528	TAATATATGCCGGGGACCAGCCCCGGCTGATCCAGGGTATTCGAAGGAGAGACGGCATAGGCGAGGATCAGGATACGATAGCTTCAATTAGGTATTAATTAAAGATATAAAGAGTAATAGAATAAGGATAGCTCAGTAGGAAAATTCAGTGGAGAAAAGAGGCTGAGTAGCTTGGTTTACGCGGGAGACCAATAAAACTTCAAGACAAGAAGTTTGCACCACTTACGTAGGCCGCAGGCGTCCTTCCGTTCTCCCAAAGGAGAGGAGACACTGAGGCCTCCCCGGTCGGATCTTAGAAGCCCAGGCATAATTAGTAAGCATGGTGGGTTCCGCGCTCCAGATGGAGACTCAACCAGAGTGAGAGAGAGAGCGACATGGGGAGACCAGTATTTCGAGAAA…	T	intronic	gene-SYNDIG1
13	43389343	43389343	T	TCCATGACATAAGCTGCCACAATTCTGAGTACCGGCCTCAAGAAATGCAAACATATGGGTCCTGGAACTGAAGACTAATGTACATAAAACAATCAAGATGACACGGGTCAGACCACTGATGACCAATTTGAAGATGACTGTCAGAGCTGACTGTGCTGTTTCTGCATATAGCACCACTATCAATTCTGTATATAAGGGCTCTTACCCCACTGGGTGAAGTGGAGGGGGGTCGGGCTTGGATCGATGTCTGTAACCCCAACAGCCTAGTTGCAGGAATCCAAAATCAAACAGACTTTCCTTTCCACCAGCCTGGCCTGATTATTGGCTTTGAAGTGAAGAGCAGCTGGCCCTGCAAATGCCCTTTTGGTAAAAGTGGGACTGTGCTCCCTCCAGTAGAAG…	intronic	gene-LOC782061
13	43588371	43589419	CCACCCTTGCCGGGGACCAGCCCCGGCTGATCCAGGGAATTCGAAGCGGGGACGGCGTCGGCGAAGATCAGGAAACAATTGCTTAATTAAACGTTAATTAAGGATATAAAGAGTAATAGAATGAGGATAGCTCAGTAGGAAAATTCAGTGGAGAAAAGAGGCTGAATAATTCAGCCAGAAGGTAAGAGAAAGAACGACATGGTGAGACCAAGTTTCGGTGAACAAGGCCCGCACTTTATTTTCCAAAGTAGTTTTTATACCTTAAGTTATGCATAGAGGATAATGGGGGAAGGGGTAGAGTCATGCAGTAAGCCAGGCTTTCTTCCTGCAAACATATCATATGCAAAAGTTTAGGTGATTTGCATCATCTTCTGGCCCGGAGGCCTTTTTCTCTAAAGG…	C	downstream	gene-AKR1C3
13	47795265	47796487	GGCAACCTGCCGGGGACCAGCCCCGGCTGAACCAGGGTATTCGAAGGAGAGACGGCGTAGGCGAAGATCAGGAAACAATTGCTTAATTAAATGTTAATTAAGGATATAAAGAGTAATAGAATGAGGATAGCTCAGTAGGAAAATTCAGTGAAGAAAAGAGGCTGAAATAAGGATAGCTCAGTGAGGAAATTCAGTGGAGAAAAGAGGCTGAATAATTCAGCCAGAAGGTAAGAGAAAGAACGACATGGTGAGACCAAGTTTCGGTGAACAAGGCCCGCACTTTATTTTCCAAAGTAGTTTTTATACCTTAAGTTATGCATAGAGGATAATGGGGGAAGGGGTAGAGTCATGCAGCAAGCCAGGCTTTCTTCCTGCAAACTTATCATATGCAAAAGTTTA…	G	intergenic	gene-GPCPD1(dist=10803),gene-LOC513580(dist=10816)
13	51711392	51712591	CCTATGGTGCCGGGAGCCGGCATATTGCATATTGAGTGCATATTGCATATTGAGTGCAGCACTTTTCAGGATCTGGAATAGCTCAACTGGAATTCTATCACTGCCGGTAGCCAGCATGAGGAACTCCGCCTCTGGCAAAGGTCATGAGGAAGGAGGCTTGACATACGCAAAGGCGGGATCAAGCCTCAGGAGTCTCCCTGGAAATTCTCGAGCAATCTACCCCCAAAACCAGAGTCTGCCTACTTTCTGCTTTGTGCTTTCACCTACACCTCTGACTTTACGGGGGGCTGTCCCCCACTACCTCTCTGAAAAAAGTTAGCTTACAGCTCCAGTTAATAATTCCTGGGTGTGACAGTGTTTAACCTACAAACTCCCTTGGAAGTCCTCTAGCCTGCCTGA…	C	intronic	gene-ATRN
13	52073977	52075198	GGAAAAGCGCCGGGGACCAGCCCCGGCTGAACCAGGGTATTCGAAGGAGAGACGGCGTAGGCGAAGATCAGGAAACAATTGCTTAATTAAATGTTAATTAAGGATATAAAGAGTAATAGAATGAGGATAGCTCAGTAGGAAAATTCAGTGAAGAAAAGAGGCTGAAATAAGGATAGCTCAGTGAGGAAATTCAGTGGAGAAAAGAGGCTGAATAATTCAGCCAGAAGGTAAGAGAAAGAACGACATGGTGAGACCAAGTTTTGGTGAACAAGGCCCGCACTTTATTTTTCAAAGTAGTTTTTATACCTTAAGTTATGCACAGAGGATAATGGGGGAAGGGGTAGAGTCTTGCAGCAAACCAGGCTTTCTTCCTGCAAACTTATCATATGCAAAAGCTTA…	G	intronic	gene-UBOX5
13	53577697	53577697	T	TGGAGTGTGCCGGGGACCTGCCCCGGCTGATCCAGGGTATTCGAAGCGGGGACGGCGTCGGCGACCTATTTATTTAAATATTTTATCAAAGATATAAAGAGTAATAGGATGAGGATAGCTCAGTAGGAAAATTCAGTGGAGAAAAGAGGCTGAGTAGCTTGGTTTACGCGGGAGACCAATAAAACTTCAAGACAAGAAGTTTGCACCACTTACGTAGGCCGCAGGCGTCCTTCCGTTCTCCCGAAGGAGAGGAGACACTGAGGCCTCCCCGGTCGGATCTTAGAAGCCCAGGCATAATTAGTAAGCATGGTGGGTTCCGCGCTCCAGATGGAGACTCAACCAGAGTGAGAGAGAGAGCGACATGGGGAGACCAGTATTTCGAGAAACTGATCCCAATTC…	intergenic	gene-LOC536097(dist=59298),gene-GINS1(dist=12902)
13	62704390	62705615	TACCAGGTGCTGGGAGCCGGCAAATTGCATATTGAGTGCATATTGCATATTGAGTGCAGCACTTTTCAGGATCTGGAATAGCTCAACTGGAATTCTATCACTGCCGGTAGCCAGCGTGAGGAACTCCGCCCATGACAACGGTCATGAGGAAGGAGGCTCGGCATACGCAAAGGCGGGATCGAGCTTCAGGAGTCCCCCTGGAAATTCTCGAGCATATACCCCCAAAACCAGAGTCTGCCTACTTTCTGCTTTGTGCTTTCACCTACACCTCTGACTTTACGGGGGGCTGTCCCCCACTACCTCTCTGAAAAAAGAGTTAGCTTACAGCTCCAGTTAATAATTCCTGGGTGTGACAGTGTTTAACCTACAAACTCCTTTGGAAATCCTCTAGCCTGCCTG…	T	intergenic	gene-BPIFA4(dist=14310),gene-BPIFA3(dist=2016)
13	68825795	68825795	C	CTACTTGTTGGGGGCCAGAGTGAGGTACTCCGCCCGTGACAAAGGTCATGAGGAAGGAGGCTCGACATACGCAAAGGCGGGATCGAGCCTCAGGAGTCCCCCTGGAACTCCTCGAGCATCTACCCCCATAACCAGAGCCTGCCTACTTTACTACTTTGTGCTCACCTACACCTCTGACTTTACGGGGGGCTGTCCCCCACCACCTCTTTTGGAGAAGGAGTTAATTTAGAGCTCCAGTTTATAATAATTCCTGGGCGTGATAAGAGTGTTTTAACCTACAAACTCCTCTGAAGGTTCTCTAGCCTGCCTGACAGGCTCGTCCGGCCACATGTGATTGCTCACAGCCTCCCAACCGTGAGAGGCACAAGATGCTTTAAACCCTCTAAAAACGGGTTCTTT…	intergenic	gene-TRNAR-UCU-7(dist=22025),gene-LOC101907117(dist=544977)
13	70311232	70312491	TTGCCGGGGTCCTGCCCCGGCTGATCCAGGGTATTAGAAGCGGGGACGGCGTCGGCGACCTATTTATTTAAATATTTTATCAAAGATATAAAGAGTAATAGGATGAGGATAGCTCAGTAGGAAAATTCAGTGGAGAAAAGAGGCTGAGTAGCTTGGTTTACGCGGGAGACCAATAAAACTTCAAGACTTACGTAGGCCGCAGGCGTCCTTCCGTTCTCCCGAAGGAGAGGAGACACTGAGGCCTCCCCGGTCGGATCTTAGAAGCCCAGGCGTAATTAGTAAGCATGGTGGGTTCCGCGCTCCAGATGGAGACTCAACCAGAGTGAGAGAGAGAGCGACATGGGGAGACCAGTATTTCGAGAAACTGACCCCAATTCTTTATTTTCCATGGTCTACTTT…	T	intergenic	gene-CHD6(dist=78941),gene-PTPRT(dist=384829)
13	73265726	73274618	CCTGTGCTGCCGGGGACCTGCCCCGGCTGATCCAGGGTATTCGAAGCGGGGACGGCGTCGGCGACCTATTTATTTAAATATTTTATCAAAGATATAAAGAGTAATAGGATGAGGATAGCTCAGTAGGAAAATTCAGTGGAGAAAAGAGGCTGAGTAGCTTGGTTTACGCGGGAGACCAATAAAACTTCAAGACAAGAAGTTTGCACCACTTACGTAGGCCGCAGGCGTCCTTCCGTTCTCCCGAAGGAGAGGAGACACTGAGGCCTCCCCGGTCGGATCCTAGAAGCCCAGGCATAATTAGTAAGCATGGTGGGTTCCGCGCTCCAGATGGAGACTCAACCAGAGTGAGAGAGAGAGCGACATGGGGAGACCAGTATTTCGAGAAACTGATCCCAATTC…	C	intergenic	gene-RIMS4(dist=41837),gene-YWHAB(dist=23235)
13	73475354	73476555	GCTGAACTGCCGGGAGCCGGCATATTGCATATTGAGTGCATATTGCATATTGAGTGCAGCACTTTTCAGGATCTGGAATAGCTCAACTGGAATTCTATCACTGCCGGTAGCCAGCGTGAGGAACTCCGCCCATGACAAAGGTCATGAGGAAGGAGGCTCGGCATACGCAAAGGCGGGATCGAGCTTCAGGAGTCCCCCTGGAAATTCTCGAGCAATCTACCCCCAAAACCAGAGTCTGTCTACTTTCTGCTTTGTGCTTTCACCTACACCTCTGACTTTACGGGGGGCTGTCCCCCACTACCTCTCTGAAAAAAGAGTTAGCTTACAGCTCCAGTTAATAATTCCTGGGTGTGACAGTGTTTAACCTACAAACTCCTTTGGAAATCCTCTAGCCTGCCT…	G	intronic	gene-KCNS1
13	73800174	73801399	TGTCGTCTGCCGGGGACCAGGCCCGGCTGATCCAGGGTATTCGAAGGAGAGACGGCGTAGGCGAGGATCAGGAAACAATTGCTTAATTAAACGTTAATTAAGGATATAAAGAGTAATAGAATGAGGATAGCTCAGTAAAATTCAGTGAAGAAAAGAGGCTGAAATAAGGATAGCTCAGTGAAGAAATTCAGTGGAGAAAAGAGGCTGAATAATTCAGCCAGAAGGTAAGAGAAAGAACGACATGGTGAGACCAAGTTTCGGTGAACAAGGCCCGCACTTTATTTTTCAAAGTAGTTTTTATACCTTAAGTTATGCATAGAGGATAATGGGGGAAGGGGTAGAGTCTTGTAGCAAACCAGGCTTTCTTCCTGCAAACTTATCATATGCAAAAGCTTAGGT…	T	intergenic	gene-LOC100196900(dist=3048),gene-LOC404105(dist=4123)
13	83111580	83112858	GTACAGGTGTTGGGGGCCAGAGTGAGGTACTCCGCCCATGGCAAAGGTCATGAGGAAGGAGGCTCGACATACGCAAAGGCGGGATCGAGCCTCAGGAGTCCCCCTGGAAATCCTCGAGCGTCTACCCCCATAACCAGAGCCTGCCTACTTTACTACTTTGTGCTCTTACCTACACCTCTGACTTTACGGGGGGCTGTCCCCCACCACCTCTTTCGGAGAAGGAGTTAACCTAGAGCTCCAGTCAATAAAAACTCTTGGGTGTGACAAGAGTGTTTTAACCTACAAACTCCTCTGAAGGTTCTCTAGCCTGCCTGACAGGCTCGTCCGGCCACATGTGATTGCTCACAGCCTCCCAACCGTGAGAGGCACGAGATGCTTTAAACCTTCTAAAAACAGGTT…	G	intergenic	gene-TRNAG-GCC-12(dist=169835),gene-CBLN4(dist=138021)
14	5855235	5855235	T	TAAAAAGTGCCGGGAGCCGGCATATTGCATATTGAGTGCATACTGCATATTGCATATTGAGTGCAGCACTTTCCACAGCATCATCTTTCAGGATCTGGAATAGCTCAACTGGAATTCTATCACTGCTGGGAGCCAGTGAGGAACTCCGCCCATGACAAAGGTCATGAGGAAGGAGGCTCGCACGCAAAGGCGGGATCGAGCCTCAGGAGTCCCCCTGGAAATTCTCGAGCATTTACACCCAAAACCAGAGTCTGCCTACTTTCTGCTTTGTGCTTTCACCTACACCTCTGACTTTATGGGGGGCTGTCCCCCACTACCTCTCTGAAAAATGTTAGCTTACAGCTCCATTTAATAATTCCTGGGTGTGACAGTGTTTAACCTACAAACTCCTTTGGAAAT…	intergenic	gene-FAM135B(dist=1203362),gene-KHDRBS3(dist=537074)
14	6670305	6672185	CTGCCAGGCTTCTCTGTCCATGGGATTTTCCAGACAGGAATACTGGAGTGGGTTGCCATTTCCTTCTCCAAGGGGATCTTCCTGAGCCAGGGATCAAACCCACATCTCTTACCTCTCCTGCATTAGCAGGTGGGTTCTTTACCACTATCGCCACTTGGGAAGCCCCATAGAACATTGCCACCATTTTTAATAACAAAAATACTATATACAGTCTATATTTTTAAGCCTAAGATCAGTTTTAATTGTTACCAGATCAATAATCTGAAAGCCTCTAGTGATTTTTTTTCTCAGTGCAGTACATTTTGTCTTCCTACTCCTTCCATCCTTCCCCTTTCTCCTTCCTCCCTCCCTCCTTTCTTCCCAGTCACCCTTCAGAGGTGATGTAAATACCTGCTTTGC…	C	intergenic	gene-KHDRBS3(dist=125559),gene-TRNAC-GCA-173(dist=35591)
14	9130063	9131361	GCACTGATGCGGGGAGCCGGTGAGGCATTCTGCTCATGACAAAGGTCATGAGGAAGGAGGCTCGGCATATGCAAAGGCGGGATCGAGCCTCAGGAGTCCCCCCGGATATTCTCGAGCATTTTCCCCCAAAAAACCAGAGTCTGCCTACTTTATTGCTTTGTGCTCTCACCTCTGACTTTACTAGGGGCTGTCCCCTACCACCATCTCACTCTCTCCCTGTCAAAGAGTTAACTTACAGCTCCAATTAATAAAGTTCCTGGGCAATTAGGAGTGTTTAAATCCAAACCCCTCAGATGGCTCTCTAACTCGCCTGACAAGTTTACTCGGACTCCTGCAGCTATGCATACAATTGTTTACAGTCTCCTAGCCTCCAGAGGCACGGGAAGCTTAAGATATTCA…	G	intronic	gene-EFR3A
14	10890757	10892047	CTGCCGGGGTCCTGCCCCGGCTGATGCAGGGTATTCGAAGCGGGGACGGCGTCGGCGACCTATTTATTTATTTAAATATTTTATCAAAGATATAAAGAGTAATAGGATGAGGATAGCCCAGTAGGAAAATTCAGTGGAGAAAAGAGGCTGAGTAGCTTGGTTTACGCGGGAGACCAATAAAACTTCAAGACAAGAAGTTTGCACCACTTACGTAGGCTGCAGGCGTCCTTCCGTTCTCCCGAAGGAGAGGAGACACTGAGGCCTCCCCGGTCGGATCTTAGAAGCCCAGGCATAATTAGTAAGCATGGTGGGTTCCGCGCTCCAGATGGAGACTCAGCCAGAGTGAGAGAGAGAGCGACATGGGGAGACCAGTATTTCGAGAAACTGATCCCAATTCTT…	C	intergenic	gene-GSDMC(dist=75645),gene-LOC100299192(dist=320884)
14	18460438	18460546	ATCTTCCAGGATTTGAAAGAGCTCAACTGGAATTCCAGCACCTCCACTAGCTTTGTTCGTATTGATGCTTCCTAAGGCCCACTAGACTTCACATTCCAGGATGTCTGGC	A	intergenic	gene-LOC515601(dist=276548),gene-TRNAM-CAU-12(dist=18426)
14	18994147	18994356	GCCACAGGACTGGAAAAGGTCAGTTTTCATTCCAATCCCAAAGAAAGGCAATGCCAAAGAATGTTCAAATGTGCTCATTTCATAGGCTAGCAAACAATGCTCAAAATCCTTCAAGCTAGGCTTCAACAGTACATGAACCAAGAACTTCAAGATGATGCTGTTTAAGTGTTGCACTCAATATGCCAGCAAATATGGAAAACTCAGCAGTGA	G	intronic	gene-LOC529047
14	21128700	21128700	C	CCTTCTGTGCCGGGAGCCGGCATATTGCATATTGAGTGCATATTGCATATTGAGTGCAGCACTTTTCAGGATCTGGAATAGCTCAACTGGAAATTCTATCACTGCCGGTAGCCAGCGTGAGGAACTCCACCCATGACAAAGGTCATGAGGAAGGAGGCTCGGCATACGCAAAGGCGGGATCGAGCTTCAGGAGTCCCCCTGGAAATTCTCGAGCATATACCCCCAAAACCAGAGTCTGCCTACTTTCTGCTTTGTGCTTTCACCTACACCTCTGACTTTACGGGGGGCTGTCCCCCACTACCTCTCTGAAAAAAGTTAGCTTACAGCTCCAGTTAATAATTCCTGGGTGTGACAGTGTTTAACCTACAAACTCCTTTGGAAATCCTCTAGCCTGCCTGA…	intergenic	gene-LOC104974020(dist=17826),gene-ST18(dist=29395)
14	23619036	23619036	G	GCACCGAAGTGCCGGGGACCAGCCCCGGCTGATCCAGGGTATTCGAAGGAGAGACGGCATAGGCGAGGATCAGGATACAATAGCTTCAATTAGATATTAATTAAAGATATAAAGAGTAATAGAATAAGGATAGCTCAGTAGGAAAATTCAGTGCAGAAAAGAGGCTGAGTAGCTTGGTTTACGCGGGGGACCAATAAAACTTCAAGACAAGAAGCTTGCACCACTTACGTAGGCCGCAGGCGTCCTTCCGTTCTCCCGAAGGAGAGGAGACACTGAGGCCTCCCCGGTCGGATCTTAGAAGCCCAGGCAAAATTAGTAAGCATGGTGGGTTCCGCGCTCCAGATGGAGACTCAACCAGAGTGAGAGAGAGAGAGCGACATGGGGAGACCAGTATTTCGA…	intergenic	gene-PENK(dist=72275),gene-IMPAD1(dist=248115)
14	28870710	28870710	C	CCACTAGTGCCGGGAGCCGGCATATTGCATATTGAGTGCATATTGCATATTGAGTGCAGCACTTTTCAGGATCTGGAATAGCTCAACTGGAATTCTATCACTGCCGGTAGCCAGCGTGAGGAACTCCGCCCATGACAAAGGTCATGAGGAAGGAGGCTCGGCATACGCAAAGGCGGGATCGAGCCTCAGGAGTCTCCCTGGAAATTCTCGAGCAATCTACCCCCAAAACCAGAGTCTGCCTACTTTCTGCTTTGTGCTTTCACCTACACCTCTGACTTTACGGGGGGCTGTCCCCCACTACCTCTCTGAAAAAAGTTAGCTTACAGCTCCAGTTAATAATTCCTGGGTGTGACAGTGTTTAACCTACAAACTCCTTTGGAAATCCTCTAGCCTGCCTGA…	intergenic	gene-YTHDF3(dist=696139),gene-MIR124A-2(dist=253646)
14	31280795	31281977	TAGGTGACCTGCCGGGGACCAGCCCCGGCTGATCCAGGGTATTCGAAGCGGGGACGGCGTCGGCGAGGATCAGGAAACAACTGCTTAATTAAACGTTAATTAAGGATATAAAGAGTAATAGAATGAGGATAGCTCAGTGAGGAAATTCAGTGGAGAAAAGAGGCTGAGTAATTCAGCCAGAAGGTAAGAGAAAGAACGACATGGTGAGACCAAGTTTCGGTGAACAAGGCCCGCACTTTATTTTTCAAAGTAGTTTTTATACCTTAAGTTATGCACAGAGGATAATGGGGGAAGGGGTAGAGTCTTGCAGCAAACCAGGCTTTCTTCCTGCAAACTTATCATATGCAAAAGCTTAGGTGATTTGCATCATCTTCTGGCCCGGAGGCCTGTTAACATTTT…	T	intronic	gene-CSPP1
14	31281193	31281260	TAAGACCTTTTCTTCAGAAAACTTATTTTTCTCTAAAGGTGATTGGTCAGGAGCCACCCTCCAAAAGC	T	intronic	gene-CSPP1
14	31281374	31281470	TATTAATCAATACACTGCCAGGGACACAGCAGGTAAGGGATATGGAAACTTAGCAGCAAACATTGGCCCAACAAGTGAAAATCCCTTCACCAATACA	T	intronic	gene-CSPP1
14	37767070	37767549	TAAGAGAGTGCCGGAGCCAGCCGGCAAAGTCGATCAGGTCCCGAGAACGTGCACGGCGGGGCTAAGAAAGAAACTAAAGCAAGAGACTACAAAGATGGGGTCGAGAGGTTCAGACACGTCACCACGAAGGGACGCAGTCTGACACCAACTTTATTCAACATCTCATATTTATACAGAAAAGCGTGAGAGAGACGAAACAGTTGACATTTTTTCTTGGTTGGCCTATACATCTTACAAACAGTCACAAGAAATCTTGAGAGCATGGGAATGGCTCCCTGTTATTATTTCTTACACCAGATAACATTTCTCTGTGCGTGAGAAGTTTGCACAGAACTCCAGGTGCCTGCAGTAAATAAGCGCCTAATCTCTGGGGTGGCGGGACAGAGAGCTATGTTTGCA…	T	intergenic	gene-GDAP1(dist=121441),gene-PI15(dist=386785)
14	38587859	38587859	G	GCTTCCCTGCCGGGGACCAGCCCCGGCTGATCCAGGGTATTCGAAGGAGAGACGGCGTAGGCGAAGATCAGGAAACAATTGCTTAATTAAATGTTAATTAAGGATATAAAGAGTAATAGAATGAGGATAGCTCAGTGAAGAAATTCAGTGGAGAAAAGAGGCTGAAATAAGGATAGCTCAGTGAAGAAATTCAGTGGAGAAAAGAGGCTGAATAATTCAGCCAGAAGGTAAGAGAAAGAACGACATGGTGAGACCAAGTTTCGGTGAACAAGGCCCGCACTTTATTTTTCAAAGTAGTTTTTATACCTTAAGTTATGCACAGAGGATAATGGGGGAAGGGGTAGAGTCTTGCAGCAAACCAGGCTTTCTTCCTGCAAACTTATCATATGCAAAAGCTTA…	intergenic	gene-CRISPLD1(dist=242317),gene-HNF4G(dist=108543)
14	42755413	42755413	T	TATATTCTGTTGGGGGCCAGAGTGAGGTACTCCGCCCGTGACAAAGGTCATGAGGAAGGAGGCTCGACATACGCAAAGGCGGGATCGAGCCTCAGGAGTCCCCCTGGAACTCCTCGAGCATCTACCCCCATAACCAGAGCCTGCCTGCTTTACTACTTTGTGCTCTTACCTACACCTCTGACTTTACGGGGGGCTGTCCCCCACCACCTCTTTCGGAGAAGGAGTTAACCTAGAGCTCCAGTTTATAATAATTCCTGGGCGTGATAAGAGTGTTTTAACCTACAAACTCCTCTGAAGGTTCTCTAGCCTGCCTGACAGGCTCGTCCGGCCACATGTGATTGCTCACAGCCTCCCAACCGTGAGAGGCACAAGATGCTTTAAACCCTCTAAAAACAGGTT…	intergenic	gene-IL7(dist=758617),gene-STMN2(dist=56444)
14	44067945	44067945	C	CACCAGGTGCCGGGAGCCGGCATATTGCATATTGAGTGCATAGTGCATATTGCATATTGAGTGCAGCACTTTCCACAGCATCATCTTTCAGGATCTGGAATACCTCAACTGGAATTCTATCACTGCCGGTAGCCAGCATGAGGAACTCCGCCCATGACAAAGGTCATGAGGAAGGAGGCTCGGCATATGCAAAGGCGGGATCGAGCTTCAGGAGTCCCCCTGGAAATTCTCGAGCATATACCCCCAAAACCAGAGTCTGCCTACTTTCTGCTTTGTGCTTTCACCTACACCTCTGACTTTACGGGGGGCTGTCCCCCACTACCTCTCTGAAAAAAGAGTTAGCTTACAGCTCCAGTTAATAATTCTTGGGTGTGACAGTGTTTAACCTACAAACTCCTT…	intronic	gene-ZNF704
14	44154945	44156162	CCTTATCTGCCGGGAGCCGGCATATTGCATATTGAGTGCATATTGCATATTGAGTGCATATTGCATATTGAGTGCAGCACTTTTCAGGATCTGGAATAGCTCAACTGGAATTCTATCACTGCCGGTAGCCAGCATGAGGAACTCCGCCTCTGGCAAAGGTCATGAGGAAGGAGGCTTGACATACGCAAAGGCGGGATCAAGCCTCAGGAGTCTCCCTGGAAATTCTCGAGCAATCTACCCCCAAAACCAGAGTCTGCCTACTTTCTGCTTTGTGCTTTCACCTACACCTCTGACTTTACGGGGGGCTGTCCCCCACTACCTCTCTGAAAAAAGTTAGCTTACAGCTCCAGTTAATAATTCCTGGGTGTGACAGTGTTTAACCTACAAACTCCCTTGGAA…	C	intergenic	gene-ZNF704(dist=68627),gene-PAG1(dist=13721)
14	49724416	49724508	TTTTCCAGTCCTGTGGCCACTGCTGAATTTTCCAAATCTGCCAGCATATTGAGTGAAGCACTTTCACAACATCATCTTTCAGGATTTAAAAGA	T	intergenic	gene-TRPS1(dist=815417),gene-CSMD3(dist=1081273)
14	50611239	50612366	GGATGAGTGCCGGGGACCAGCCCCGGCTGATCCAGGGTATTCGAAGGAGAGATGGCGTAGGCGAAGATCAGGAAACAATTGCTTAATTAAATGTTAATTAAGGATATAAAGAGTAATAGAATGAGGATAGCTCAGTAGGAAAATTCAGTGAAGAAAAGAGGCTGAAATAAGGATAGCTCAGTGAGGAAATTCAGTGGAGAAAAGAGGCTGAATAATTCAGCCAGAAGGTAAGAGAAAGAACGACATGGTGAGACCAAGTTTCGGTGAACAAGGCCCGCACTTTATTTTCCAAAGTAGTTTTTATACCTTAAGTTATGCATAGAGGATAATGGGGGAAGGGGTAGAGTCAGGCAGCAAGCCAGGCTTTCTTCCTGCAAACTTATCATATGCAAAAGTTAG…	G	intergenic	gene-TRPS1(dist=1702240),gene-CSMD3(dist=193415)
14	52054419	52055711	CAGTCAGTGTTGGGGGCCAGAGTGAGGTACTCCGCCCATGGCAAAGGTCATGAGGAAGGAGGCTCGACATACACAAAGGCGGGATCGAGCCTCAGGAGTCCCCCTGGAAATCCTCGAGCGTCTACCCCCATAACCAGAGCCTGCCTACTTTACTACTTTGTGCTCTTACCTACACCTATGACTTTACGGGGGGCTGTCCCCCACCACCTCTTTCGGAGAAGGAGTTAACCTAGAGCTCCAGTTAATAATAATTCCTGGGCGTGATAGTGTTTTAACCTACAAACTCCTCTGAAGGTTCTCTAGCCTGCCTGACAGGCTCGTCCAGCCACATGTGATTGCTCACAGCCTCCCAACCGTGAGAGGCACAAGATGCTTTAAACCCTCTAAAAACAGGTTCTT…	C	intergenic	gene-LOC112449525(dist=77220),gene-LOC112449556(dist=52259)
14	52650269	52650269	C	CATAATAGGAACTTCAGAACATTATATCTTTGATAAAATATTTAAATAAATAGGTCGCCGACGCCGTCCCCGCTTCGAATACCCTAAATCAGCCGGGGCAAGACCCCGGCA	intergenic	gene-LOC112449524(dist=374479),gene-TRNAE-UUC-69(dist=673519)
14	53118134	53119424	AAGGTTTTTGTTGGGGGCCAGAGTGAGGTACTCCGCCCGTGACAAAGGTCATGAGGAAGGAGGCTCGACATAGGCAAAGGCGGGATCGAGCCTCAGGAGTCCCCCTGGAACTCCTCGAGCATCTACCCCCATTACCAGAGCCTGCCTACTTTACTACTTTGTGCTCTTACCTACACCTCTGACTTTACGGGGGGCTGTCCCCCACCACCTCTTTCGGAGAAGGAGTTAACCTAGAGCTCCAGTCAATAAAAACTCTTGGGTGCGACAAGAGTGTTTTAACCTACAAACTCCTCTGAAGGTTCTCTAGCCTGCCTGACAGGCTCGTCCGGCCACATGTGATTGCTCACAGCCTCCCAACCGTGAGAGGCACGAGATGCTTTAAACCTTCTAAAAACAGGT…	A	intergenic	gene-LOC112449524(dist=842344),gene-TRNAE-UUC-69(dist=204364)
14	54106927	54108190	CCAGAGTGCCGGGGACCAGCCCCGGCTGATCCAGGGTATTCGAAGGAGAGACGGCGTAGGCGACGATCAGGAAACAATTGCTTAATTAAATGTTAATTAAGGATATAAAGAGTAATAGAATGAGGATAGCTCAGTAAAATTCAGTGAAGAAAAGAGGCTGAAATAAGGATAGCTCAGTGAGGAAATTCAGTGGAGAAAAGAGGCTGAAATAAGGATAGCTCAGTGAGGAAATTTAGTGCAGAAAAGAGGCTGAATAATTCAGCCAGAAGGTAAGAGAAAGAACGACATGGTGAGACCAAGTTTCGGTGAACAAGGCCCGCACTTTATTTTTCAAAGTAGTTTTTATACCTTAAGTTATGCACAGAGGATAATGGGGGAAGGGGTAGAGTCTTGCAGCAA…	C	intergenic	gene-TRNAC-ACA-66(dist=690122),gene-KCNV1(dist=378786)
14	58029187	58030314	TACCCAGTGCGGGGAGCGAGCTCCGCCTCTGGCAAAGGTCATGAGGAAGGAGGCTTGGCATACGCAAAGGCGGGATCAAGCCTCAGGAGTCTCCCTGGAAATTCTCGAGCAATCTACCCCCAAAACCAGAGTCTGCCTACTTTCTGCTTTGTGCTTTCACCTACACCTCTGACTTTACGGGGGGCTGTCCCCCACTACCTCTCTGAAAAAAGAGTTAGCTTACAGCTCCAGTTAATAATTCCTGGGTGTGACAGTGTTTCAACCTACAAACTCCCTTGGAAGTCCTCTAGCCTGCCTGAATAGGTTTTTCCGGCCACATGTGATTGTTCAGAGCCTCCCAACTGTGAGAGGCAGGAGATGTTCTAAACTGTCTAAACACAGATTCTTTTGAGTAGTTAA…	T	intronic	gene-OXR1
14	58444913	58446177	TACCCTTCTGCCGGGAGCCGGCATATTGCATATTGAGTGCATATTGCATATTGAGTGCAGCACTTTTCAGGATCTGGAATAGCTCAACTGGAAATTCTATCACTGCCGGTAGCCAGCGTGAGGAACTCCGCCCATGACAAAGGTCATGAGGAAGGAGGCTCGGCATACGCAAAGGCGGGATCGAGCTTCAGGAGTCCCCCTGGAAATTCTCGAGCATATACCCCCAAAACCAGAGTCTGCCTACTTTCTGCTTTGTGCTTTCACCTACACCTCTGACTTTACGGGGGGCTGTCCCCCACTACCTCTCTGAAAAAAGTTAGCTTACAGCTCCAGTTAATAATTCCTGGGTGTGACAGTGTTTAACCTACAAACTCCTTTGGAAATCCTCTAGCCTGCCTG…	T	intergenic	gene-OXR1(dist=51188),gene-ZFPM2(dist=372738)
14	58445199	58445266	GGCTGTCCCCCACTACCTCTCTGAAAAAAGTTAGCTTACAGCTCCAGTTAATAATTCCTGGGTGTGAC	G	intergenic	gene-OXR1(dist=51474),gene-ZFPM2(dist=373649)
14	65727825	65729118	GGACATGTGCCGGGGACCAGCCCCGGCTGATCCAGGGTATTCGAAGGAGAGACGGCATCGGCGAGGGTCAGGATACAATAGCTTAATTAAATATTAATTAAAGATATAAAGAGTAATAGAATAAGGATAGCTCAGTAGGAAAATTCAGTGGAGAAAAGAGGCTGAGTAGCTTGGTTTACGCGGGAGACCAATAAAACTTCAAGACAAGAAGTTTGCACCACTTACGTAGGCCGCAGGCGTCCTTCCGTTCTCCCGAAGGAGAGGAGACACTGAGGCCTCCCCGGTCGGATCTTAGAAGCCCAGGCATAATTAGTAAGCATGGTGGGTTCCGCGCTCCAGATGGAGACTCAACCAGAGTGAGAGAGAGAGCGACATGGGGAGACCAGTATTTCGAGAAAC…	G	intronic	gene-STK3
14	68672098	68673319	TCTCACTTGCCGGGAGCCGGCATATTGCATATTGAGTGCATATTGCATATTGAGTGCAGCACTTTTCAGGATCTGGAATAGCTCAACTGGAATTCTATCACTGCCGGTAGCCAGCGTGAGGAACTCCGCCCATGACAAAGGTCATGAGGAAGGAGGCTCGGCATACGCAAAGGCGGGATCAAGCCTCAGGAGTCTCCCTGGAAATTCTCGAGCAATCTACCCCCAAAACCAGAGTCTGCCTACTTTCTGCTTTGTGCTTTCACCTACACCTCTGACTTTACGGGGGGCTGTCCCCCACTACCTCTCTGAAAAAAGTTAGCTTACAGCTCCAGTTAATAATTCCTGGGTGTGACAGTGTTTAACCTACAAACTCCTTTGGAAATCCTCTAGCCTGCCTGA…	T	intergenic	gene-GDF6(dist=596376),gene-TRNAS-AGA-3(dist=381448)
14	69851284	69852337	TACCTCAGTGTGGGGAGCGAGCTCCGCCCGTGGCAAAGGTCATGAGGAAGGAGGCTTGACATACGCAAAGGCGGGATCAAGCCTCAGGAGTCTCCCTGGAAATTCTCGAGCAATCTACCCCCAAAACCAGAGTCTGCCTACTTTCTGCTTTGTGCTTTCACCTACACCTCTGACTTTACGGGGGGCTGTCCCCCACTACCTCTCTGAAAAAAGAGTTAGCTTACAGCTGCAGTTAATAATTCCTGGGTGTGACAGTGTTTCAATCTACAAACTCCCTTGGAAGTCCTCTAGCCTGCCTGAATAGGTTTTTCCGGCCACATGTGATTGCTCAGAGCCTCCAAACTGTGAGAGGCATGAGATGTTCTAAACTGTCTAAATACAGATTCCTTTGAGCAGTTA…	T	intergenic	gene-VIRMA(dist=5257),gene-RAD54B(dist=5894)
14	71841729	71842212	CCACATATGTGAGGAGCTGCCCATGAGAACGGGGTCCTTTGTCCGAAGGACACAGCTCTGGGAGCTGCCTCAGTACTTGAGGGTTTGCTTGCAAACATAGCTCTCTGTCCCGCCACCCCAGAGATTAGGCGCTTATTTACTGCAGACACCTGGAGTTCTGTGCAAACTTCTCACGCACAGAGAAATGTTATCTGGTGTAAGAAATAATAACAGGGTGCCATTCCCATGCTCTCAAGATTTCTTGTGACTGTTTGTAAGATGTATAGGTCAACCAAAAAAAAATGTCAACTGTCTTGTCTTTCTCATGCTCTTCTGTATAAATACAAGATGCTGAATAAAGTTGGTATCAGACTGCATCCCTTCATGGAGACGTGTCTGAACCTCTCGACCCCATCTTTG…	C	intergenic	gene-TRIQK(dist=336723),gene-RUNX1T1(dist=459075)
14	74546495	74546567	AGGCCTCCCTGGTCGGATCTTAGAAGCCCAGGCATAATTAGTAAGCATGGCGGGTTCCGCGCTCCAGATGGAG	AATA	intronic	gene-MMP16
14	77619775	77621945	AGCACTCTAGACTTTCACTAACCATCTCCTTTCAGTCCTTCCAGATTTTCCCTCTGCGAGGTTCCTAAGCAACACCAACATTTTCATTCATCTGCTATGTGAGCTAGGAAAGCTCTGGCAAGCCTAGACAGTGTACTGAAAAGCAAAGACATCCCTTTGGTGACAAAAGTCTGTACAGTCAAAGCTATGGTTTTTCCAGTAGTCATGTATGGATGTGAGAGTTGGACCATAATGAAAGTCAAAGTGAAAGTGAAGTCGCTCAATCGTGTCCAACTCTTTGTGACCCTGTGGACTGTAGCCCACCAGGCTCCTCTGTCCGTGGGATCCTCCAGGCAAGAATACTGGAGTGGGTTGCCATTTCCTTCTCCAGGGGATCTTCCCGACCCAGGGATCGAGCCC…	A	intergenic	gene-LOC506670(dist=85834),gene-RALYL(dist=45548)
14	78260755	78261234	CACTAAATGCGGGGAGCTGCCCGTGAGAATGGGGTCCTTTGTCCGAAGGACATAGCTCTGGGAGCTGCCTCAGTCCTTGAGGGTTTGCTTGCAAACATAGCTCTCTGTCCCGCCACCCAGAGATTAGGCGCTTATTTACTGCAGACACCTGGAGTTCTGTGCAAACTTCTCACGCACAGAAAAATGTTATCTGGTGTAAGAAATAATAACAGGGTGCCATTCCCATGCTCTCAAGATTTCTTGTGACTGTTTGTAAGATGTATAGGTCAACCAAGAAAAAGTTAACTGTCTTGTCTTTCTCACGCTTTTCTGTATAAATATAAGATGCTGAATAAAGTTGGTGTCAGGCTGCGTCCCTTCGTGAAGACGTGTCTGAACCTCTCAACCCCATCTTTGTTG…	C	intronic	gene-RALYL
14	79275186	79275186	G	GCCTGCCTGTTGGGGGCCGGCGTGAGGCACTCCACCCATGACAAAGGTCATGAGGAAGGAGGCTCGACATACGCAAAGGCGGGATCGAGCCTCAGGAGTCCCCCTGGAAATCCTCGAGCATCTACCCCCATAACCAGAGCCTGCCTACTTTACTACTTTGTGCTCACCTACACCTCTGACTTTACGGGGGGCTGTCCCCCACCACCTCTTTCGGAAAAGGAGTTAACTTAGAGCTCCAGTTAATAATAATTCCTGGGTGTGATAGGAGTGTTTCAACCTACAAACTCCTCTGAAGGTTCTCTAGCCTGCCTGACAGGCTTGTCCGGCCACATGTGATTGCTCACAGCCTCCCAACCGTGAGAGGCACGAAATGCTTTAAACCTTCTAAAAACAGGTTCC…	intergenic	gene-TRNAS-GGA-27(dist=423917),gene-LOC784458(dist=1166622)
14	79298936	79302585	ATGACATTTGCTTTTTGAAGATTTATTTATTTTTTTTTTAATTTTATTTTATTTTTAAACTTTACATAATTGTATTAGTTTTGCCAAATATCAAAATGAATCCATCACAGGTATACATGTGCTCCCCTTCCTGAACCCTCCTCCCTCCTCCCTCCCCATACCATCCCTCTGGGTCGTCCCAGTGCTCTAGCCCCAAGCATCCAGTATCGTGCATTGAACCTGGACTGGCATCTCGTGTCATACATGATATTTTACATGTTTCAATGCCATTCTCCCAAATCTTCCCACCCTCTCCCTCTCCCATAGAGTCCATAAGACTGTTCCATACATCAGTGTCTCTTTTGCTGTCTCGTACACAGGGTTATTGTTATCATCTTTCTAAATTCCATATATATGCAT…	A	intergenic	gene-TRNAS-GGA-27(dist=447667),gene-LOC784458(dist=1139223)
14	79423292	79424596	GCATTTGTGTTGGGGGCCAGCGTGAGGCACTCCGCCCGTGGCAAAGGTCATGAGGAAGGAGGCTCGACATACGCAAAGGCGGGATCGAGCCTCAGGAGTCCCCCTGGAAATCCTCGAGCGTCTACCCCCATAACCAGAGCCTGCCTACTTTACTACTTTGTGCTCTCCCCTACACCTCTGACTTTACGGGGGGCTGTCCCCCACCACCTCTTTCGGAGAAGGAGTTAACCTAGAGCTCCAGTCAATAAAAACTCTTGGGTGTGACAAGAGTGTTTTAACCTACAAACTCCTCTGAAGGTTCTCTAGCCTGCCTGAGAGGCTCGTCCGGCCACATGTGATTGCTCACAGCCTCCCAACCGTGAGAGGCACGAGATGCTTTAAACCTTCTAAAAACAGGTT…	G	intergenic	gene-TRNAS-GGA-27(dist=572023),gene-LOC784458(dist=1017212)
14	79662203	79662203	C	CATTGGATGCCGAGGACCAGCCCCGGCTGATCCAGGGTATTCGAAGGGGAGACAGCGTCGGCGACTATTTATATGCTAATTAGAGATATAGAGAACAACAGAATGAGGATAGCTCAGTAGGAAAATTCAGTGGAGAAAAGAAGCTGAGTAGCTTGGTTTACGCGGGAGACCAATAAAACTTCAAGACAAGAAGTTTGCACCACTTACGTAGGCCGCAGGCGCCCTCTCGAATAGCGGAAGGTGTCTCACCCTAGACACCTTCTCGAGTGGGTCTTAGAAGCCCAGGCATGATTAGTAAGCGTGGTGGGTTCCGCGCTCCAGATGGAGACTCAGCTGGAAGTTAAAAGAAAGAATGACATGGGGAGACCAAGCGTTGGTGAGCAAGGCCCGTAGCTTTAT…	intergenic	gene-TRNAS-GGA-27(dist=810934),gene-LOC784458(dist=779605)
14	79716772	79725199	GGCACCCTGCCGGGGTCCAGCCCCGGTGGATCCAGGGAATTCGAAGCGGGGACGGCGTCGGCGAGGATCAGGAAACAATTGCTTAATTAAACGTTAATTAAGGATATAAAGAGTAATAGAATGAGGATAGCTCAGTGAGGAAATTCAGTGGAGAAAAGAGGCTGAAATAAGGATAGCTCAGTGAGGAAATTCAGTGGAGAAAAGAGGCTGAATAATTCAGCCAGAAGGTAAGAGAAAGAACGACATGGTGAGACCAAGTTTCGGTGAACAAGGCCCGCACTTTATTTTCCAAAGTAGTTTTTATACCTTAAGTTATGCATAGAGGATAATGGGGGAAGGGGTAGAGTCATGCAGCAAGCCAGGCTTTCTTCCTGCAAACTTATCATATGCAAAAGTTTA…	G	intergenic	gene-TRNAS-GGA-27(dist=865503),gene-LOC784458(dist=716609)
14	79845657	79846959	CATGTTTTGCCGGGGACCAGCCCCAGCTGATCCAGGGTATTCGAAGGAGAGACGGCATAGGCGAGGATCAGGATACGATAGCTTCAATTAGGTATTAATTAAAGATATAAAGAGTAATAGAATAAGGATAGCTCAGTAGGAAAATTCAGTGGAGAAAAGAGGCTGAGTAGCTTGGTTTACGCGGGAGACCAATAAAACTTCAAGACAAGAAGTTTGCACCACTTACGTAGGCCGCAGGCGTCCTTCCGTTCTCCCGAAGGAGAGGAGACACTGAGGCCTCCCCGGTCGGATCTTAGAAGCCCAGGCATAATTAGTAAGCATGGTGGGTTCCGCGCTCCAGATGGAGACTCAACCAGAGTGAGAGAGAGAGCGACATGGGGAGACCAGTATTTAGAGAAA…	C	intergenic	gene-TRNAS-GGA-27(dist=994388),gene-LOC784458(dist=594849)
14	80080657	80081954	GGGAAAGTGCTGGGGACCAGCCCCAGCTGATCCAGGGTATTCGAAGGAGAGACGGCCTAGGCGACTATTTACATGCTAATTAGAGATATAGAGAACAATAGAATGAGGATAGCTCAGTAGGAAAATTCAGTGGAGAAAAGAAGCTGAGTAGCTTGGTTTACGCGGGAGACCAATAAAACTTCAAGACAAGAAGTTTGCACCACTTACGTAGGCCGCAGGCGCCCTCTCGAATAGCGGAAGGTGTCTCACCCTAGACTCCTTCTCGAGTGGGTCTTAGAAGCCCAGGCATGATTAGTAAGCGTGGTGGGTTCCGCGCTCCAGATGGAGACTCAGCTGGAAGTTAAAAGAAAGAATGACATGGGGAGACCAAGCGTTGGTGAGCAAGGCCCGTAGCTTTAT…	G	intergenic	gene-TRNAS-GGA-27(dist=1229388),gene-LOC784458(dist=359854)
14	82052428	82053725	TGTCAACTGCTGGGGACCAGCCCCAGCTGATCCAGGGTATTCGAAGGAGAGACGGCCTAGGCGACTATTTATATGCTAATTAGAGATATAGAGAACAATAGAATGAGGATAGCTCAGTAGGAAAATTCAGTGGAGAAAAGAAGCTGAGTAGCTTGGTTTACGCGGGAGACCAATAAAACTTCAAGACAAGAAGTTTGCACCACTTACGTAGGCCGCAGGCGCCCTCTCGAATAGCGGAAGGTGTCTCACCCTAGACTCCTTCTCGAGTGGGTCTTAGAAGCCCAGGCATGATTAGTAAGCGTTGTGGGTTCCGCGCTCCAGATGGAGACTCAGCTGGAAGTTAAAGGGAAGAATGACATGGGGAGACCAAGCGCTGGTAAACAAGGCCCTTAGCTTTAT…	T	intergenic	gene-SNTB1(dist=42547),gene-SLC2A5(dist=304776)
14	82052537	82052684	TAGCTCAGTAGGAAAATTCAGTGGAGAAAAGAAGCTGAGTAGCTTGGTTTACGCGGGAGACCAATAAAACTTCAAGACAAGAAGTTTGCACCACTTACGTAGGCCGCAGGCGCCCTCTCGAATAGCGGAAGGTGTCTCACCCTAGACT	TGC	intergenic	gene-SNTB1(dist=42656),gene-SLC2A5(dist=305817)
14	82052973	82053036	CTGGCCAGAAGGCCTACTAACATTTTATGACTCTTGACAAGGACTTATCAACAAAGACTTACTT	C	intergenic	gene-SNTB1(dist=43092),gene-SLC2A5(dist=305465)
14	82053334	82053552	TGAATATCTTAAGCTTCCCGTGCCTCTGGAGGCTAGGAGACTGTAAACAATCGTATGCATAGCTGCAGGAGTCCGGGTAAACTTGTCAGGCGAGTTAGAGAGCCATCAGAGGGGTTTGGATTTAAACACTCCTAATTGCCCAGGAACTTTATTAATTGGAGCTGTAAGTTAACTCTTTGACACAGAGAGAGAGAGATGGTGGTAGGGGACAGCCCCCAG	TT	intergenic	gene-SNTB1(dist=43453),gene-SLC2A5(dist=304949)
15	858455	859753	AAGGTGGGTGCCGGGGACCGGCCCCGGCTGATCCAGGGTACTCGAAGGAGAGACGGCATCGGCGAGGGTCAGGATACGATAGCTTCAATTAGATATTAATTAGAGATATAAAGAGTAATAGAATAAGGATAGCTCAGTAGGAAAATTCAGTGGAGAAAAGAGGCTGAGTAGCTTGGTTTACGCGGGGGACCAATAAAACTTCAAGACAAGAAGCTTGCACCACTTACGTAGGCCGCAGGTGTCCTTCCGTTCTCCCGAAGGAGAGGAGACACTGAGGCCTCCCCGGTCGGATCTTAGAAGCCCAGGCAAAATTAGTAAGCTTGGTGGGTTCCACGCTCCAGATGGAGACTCAGCCAGAGGGAGAGAGAGACATGGGGAGACCAGTATTTTGAGAAACTG…	A	intergenic	gene-LOC532486(dist=93108),gene-LOC515790(dist=23560)
15	1707727	1707727	G	GGACCAGTGCGGGGAGCGAGCTCCGCCTCTGGCAAAGGTCATGAGGAAGGAGGCTTGGCATACGCAAAGGCGGGATCAAGCCTCAGGAGTCTCCCTGGAAATTCTCGAGCAATCTACCCCCAAAACCAGAGTCTGCCTACTTTCTGCTTTGTGCTTTCACCTACACTTCTGACTTTATGGGGGGCTGTCCCCCACTTCCTCTCTGAAAAAAGAGTTAGCTTATAGCTCCAGTTAATAATTCCTGGGTGTGACAGTGTTTCAACCTACAAACTCCCTTGGAAGTCCTCTAGCCTGCCTGAATAGGTTTTTCCGGCCACATGTGATTGCTCAGAGCCTCCAAACTGTGAGAGGCATGAGATGTTCTAAACTGTCTAAATACAGATTCCTTTGAGCAGTCAA…	intergenic	gene-KBTBD3(dist=37366),gene-MSANTD4(dist=58265)
15	2212133	2212133	T	TATATAGTGTTGGGGGCCAGAGTGAGGTACTCCGCCCATGGCAAAGGTCATGAGGAAGGAGGCTCGACATACGCAAAGGTGGGATCAAGCCTCAGGAGTCCCCCTGGAAATCCTCGAGCGTCTACCCCCATAACCAGAGCCTGCCTACTTTACTACTTTGTGCTCTTACCTACACCTCTGACTTTACGGGGGGCTGTCCCCCACCACCTCTTTCGGAGAAGGAGTTAACCTAGAGCTCCAGTTAATAATAATTCCTGGGCGTGATAAGAGTGTTTTAACCTACAAACTCCTCTGAAGGTTCTCTAGCCTGCCTGACAGGCTCGTCCGGCCACATGTGATTGCTCACAGCCTCCCAACCGTGAGAGGCACGAGATGCTTTAAACCCTCTAAAAACAGGTT…	intronic	gene-GRIA4
15	3646858	3648147	CCCCACCTGCCGGGGTCCTGCCCCGGCTGATCCAGGGTATTTGAAGCAGGGATGGCATCGGCGACCTATTTATTTAAATATTTTATCAAAGATATAAAGAGTAATAGGATGAGGATAGCTCAGTAGGAAAATTCAGTGGAGAAAAGAGGCTGAGTAGCTTGGTTTACGCGGGAGACCAATAAAACTTCAAGACAAGAATTTTGCACCACTTACGTAGGCTGCAGGCGTCCTTCCATTCTCCCGAAGGAGAGGAGACACTGAGGCCTCCCCGGTCGGATCTTAGAAGCCCAGGCATAATTAGTAAGCATAGCGGGGTCCGCGCTGCAGATGGAGACTCAACCAGAGTGAGAGAGAGAGCGACATGGGGAGACCAGTATTTCGAGAAACTGATCCCAATTC…	C	intergenic	gene-CASP4(dist=377168),gene-PDGFD(dist=611284)
15	3646862	3646967	ACCTGCCGGGGTCCTGCCCCGGCTGATCCAGGGTATTTGAAGCAGGGATGGCATCGGCGACCTATTTATTTAAATATTTTATCAAAGATATAAAGAGTAATAGGAT	ATA	intergenic	gene-CASP4(dist=377172),gene-PDGFD(dist=612464)
15	3647781	3647843	GCATCTCGTGCCTCTCACGGTTGGGAGGCTGTGAGCAATCACATGTGGCTGGACAAGCCTGTC	GAG	intergenic	gene-CASP4(dist=378091),gene-PDGFD(dist=611588)
15	3920497	3921740	CTGCCGGGGACCAGCCCCGGCTGATCCAGGGTATTCGAAGGAGAGACGGCATAGGCGAGGATCAGGAAACAATTGCTTAATTAAACGTTAATTAAGGATATAAAGAGTAATAGGATGAGGATAACTCAGTGAGGAAATTCAGTGGAGAAAAGAGGCTGAAATAAGGATAGCTCAGTGAGGAAATTCAGTGGAGAAAAGAGGCTGAATAATTCAGCCAGAAGGTAAGAGAAAGAACGACATGGGGAGACCAAGTTTCGGTGAACAAGCCCTCACTTTATTTTCCAAAGTAGTTTTTATACCTTAAGTTATGCATAGAGGATAATGGGGGAAGGGGTAGAGTCAGGCAGCAAGCCAGGCTTTCTTCCTGCAAACTTATCATATGCAAAAGCTTAGGTGATT…	C	intergenic	gene-CASP4(dist=650807),gene-PDGFD(dist=337691)
15	9340024	9341317	ATGCGGGGAGCCGGTGAGGCATTCCACTCGTGACAAAGGTCATGAGGAAGGAGGCTCGGCATACGCAAAGGCGGGATCGAGCCTCAGGAGTCCGCCCGGATATTCTCGAGCATTTTCCCCCAAAAAACCAGAGTCTGCCTACTTTATTGCTTTGTGCTCTCACCTCTGACTTTACTGGGGGCTGTCCCCTACCACCATCTCTCTCTCTCTGTGTCAAAGAGTTAACTTACAGCTCCAATTAATAAAGTTCCTGGGCAATTAGGAGTGTTTAAATCCAAACCCCTCTGATGGCTCTCTAACTCGCCTGACAAGTTTACCCGGACTCCTGCAGCTGTGCATACGATTGTTTACAGTCTCCCAGCCTCGAGAGGCATGGGAAGCTTAAGATATTCAAATAGC…	A	intronic	gene-CNTN5
15	16529342	16529434	ATTCAGCCTCTTTTCTCCACTGAATTTCCTCACTGAGCTATCCTTATTTCAGCCTCTTTTCTCCACTGAATTTCCTCACTGAGCTATCCTTAT	A	intronic	gene-GUCY1A2
15	33717109	33718188	TGCGGGGAGCGAGCTCCGCCTCTGGCAAAGGTCATGAGGAAGGAGGCTTGGCATACGCAAAGGCGGGATCAAGCCTCAGGAGTCTCCCTGGAAATTCTCGAGCAATCTACCCCCAAAACCAGAGTCTGCCTACTTTCTGCTTTGTGCTTTCACCTACACCTCTGACTTTACGGGGGGCTGTCCCCCACTACCTCTCTGAAAAAAGAGTTAGCTTATAGCTCCAGTTAATAATTCCTGGGTGTGACAGTGTTTCAACCTACAAACTCCCTTGGAAGTCCTCTAGCCTGCCTGAATAGGTTTTTCCGGCCACATGTGATTGCTCAGAGCCTCCAAACTGTGAGAGCCATGAGATGTTCTAAACTGTCTAAATACAGATTCCTTTGAGCAGTCTAAAGATTG…	T	intronic	gene-CLMP
15	45293040	45293040	G	GGTGCATTGCCGGGAGCCGGCATATTGCATATCGAGTGCATATTGCATATTGAGTGCAGCACTTTTCAGGATCTGGAATAGCTCAACTGGAATTCTATCACTGCCGGTAGCCAGCGTGAGGAACTCCGCCCATGACAAAGGTCATGAGGAAGGAGGCTCGGCATACGCAAAGGCGGGATCGAGCTTCAGGAGTCCCCCTGGAAATTCTTGAGCATATACCCCCAAAACCAGAGTCTGCCTACTTTCTGCTTTGTGCTTTCACCTACACCTCTGACTTTACGGGGGGCTGTCCCCCACTACCTCTCTGAAAAAAGTTAGCTTACAGCTCCAGTTAATAATTCCTGGGTGTGACAGTGTTTAACTTACAAACTCCTTTGGAAATCCTCTAGCCTGCCTGAA…	intronic	gene-SYT9
15	46754591	46758731	AATGCCGGGGACCAGCCCCGGCTGATCCAGGGTATTCGAAGGAGAGACGGCGTAGGCGAAGATCAGGAAACAATTGCTTAATTAAACGTTAATTAAGGATATAAAGAGTAATAGAATGAGGATAGCTCAGTGAAGAAATTCAGTGGAGAAAAGAGGCTGAAATAAGGATAGCTCAGTGAGGAAATTCAGTGGAGAAAAGAGGCTGAATAATTCAGCCAGAAGGTAAGAGAAAGAACGACATGGTGAGACCAAGTTTCGGTGAACAAGGCCCGCACTTTATTTTTCAAAGTAGTTTTTATACCTTAAGTTATGCACAGAGGATAATGGGGGAAGGGGTAGAGTCTTGCAGCAAACCAGGCTTTCTTCCTGCAAACTTATCATATGCAAAAGCTTAGGTGA…	A	intergenic	gene-CAVIN3(dist=42021),gene-CCKBR(dist=6675)
15	46754879	46754948	GTAGTTTTTATACCTTAAGTTATGCACAGAGGATAATGGGGGAAGGGGTAGAGTCTTGCAGCAAACCAGG	GC	intergenic	gene-CAVIN3(dist=42309),gene-CCKBR(dist=10458)
15	46755309	46755452	CAATCTTTTAACTACTCAAAAGAATCTGTGTTTAGACAGTTTAGAACATCTCCTGCCTCTCACAGTTGGGAGGCTCTGAACAATCACATGTGGCCGGAAAAACCTATTCAGGCAGGCTAGAGGATTTCCAAAGGAGTTTGTAGG	C	intergenic	gene-CAVIN3(dist=42739),gene-CCKBR(dist=9954)
15	46755480	46755586	TAACTGGAGCTGTAAGCTAACTTTTTTCAGAGAGGTAGTGGGGGACAGCCCCCCGTAAAGTCAGAGGTGTAGGTGAAAGCACAAAGCAGAAAGTAGGCAGACTCTGG	T	intergenic	gene-CAVIN3(dist=42910),gene-CCKBR(dist=9820)
15	47761469	47762760	GAAGAGTCTGTTGGGGGCCAGAGTGAGGTACTCCGCCCCTGACAAAGGTCATGAGGAAGGAGGCTCGACATACGCAAAGGCGGGATCGAGCCTCAGGAGTCCCCCTGGAAATCCTCGAGCGTCTACCCCCATAACCAGAGTCTGCCTACTTTACTACTTTGTGCTCTTACCTACACCTCTGACTTTACGGGGGGCTGTCCCCCACGACCTCTTTCGGAGAAAGAGTTAACCTAGAGCTCCAGTTAATAATAATTCCTGGGCGTGATAAGAGTGTTTTAACCTACAAACTCCTCTGAAGGTTCTCTAGCCTGCCTGACAGGCTTGTCCGGCCACATGTGATTGCTCACAGCCTCCCAACCGTGAGAGGCATGAGATGCTTTAAACCTTCTAAAAACAGGT…	G	intergenic	gene-LOC788037(dist=78722),gene-LOC616948(dist=15708)
15	49627158	49627158	G	GAATACATGCGGGGAGCTGCCCGTGAGAACGGGGTCCTTTGTCTGAAGGACACAGCTCTGGGAGCTGCCTCAGTCCTTGAGGGTTTGCTTGCAAACATAGCTCTCTGTCCCGCCACCCCAGAGATTAGGCGCTTATTTACTGCAGGCACCTGGAGTTCTGTGCAAACTTCTCATGCACAGAGAAATGTTATCTGGTGTAAGAAATAATAACAGGGAGCCATTCCCATGCTCTCAAGATTTCTTGTGACTGTTTGTAAGATGTATAGGCTAACCAAGAAAAAAGGTCAACTGTTTTGTCTTTCTCACGCTTTTCTGTATAAATATGAGATGTTGAATAAAGTTGGTGTCAGACTGCGTCCCTTCGTGGTGACGTGTCTGAACCTCTCGACCCCATCTTTG…	intergenic	gene-LOC112441577(dist=15444),gene-LOC107131374(dist=9590)
15	50050924	50050925	TG	TTGACATAGTGCTGGGAGCGAGCTCTGCCCGTGGCAAAGGTCATAAGGAAGGAGGCTTGGCATACGCAAAGGCGGGATCGAGCCTCAGGAGTCCCCCTGGAAATTCTCCAGCATCTACCCTCCAAACCAGAGTCTGCCTACTTTCTGCTTTGTGCTTTCACCTACACCTCTGACTTTACAGGGAGCTGTCCCCCACTACCTCTCTATGAAAAAAAGAGTTAGCTTACAGCTCCAGTTAAAATTCCTGGGTGTGACAGTGTTTCAACCTACAAACTCCTTTGGAAATCCTCTACCCTGCCTGAATAGGTTTTTCCGGCCACATGTGATTGTTCAGAGCCTCCCAACTGTGAGAGGCAGGAGATGTTCTAAACTGTCTAAACACAGATTACTTTGAGTAGT…	intergenic	gene-LOC508595(dist=8289),gene-LOC788825(dist=21528)
15	52501125	52502404	TACGGAATTGCCGGGGTCCTGCCCCGGCTGATCCAGGGTATTCGAAGCGGGGACGGCGTCGGCGACCTATTTATTTAAATATTTTATCAAAGATATAAAGAGTAATAGGATGAGGATAGCTCAGTAGGAAAATTCAGTGGAGAAAAGAGGCTGAGTAGCTTGGTTTACGCGGGGGACCAATAAAACTTCAAGACAAGAAGCTTGCACCACTTACGTAGGCCGCAGGCGTCCTTCCGTTCTCCCGAAGGAGAGGAGACACTGAGGCCTCCCCGGTCGGATCTTAGAAGCCCAGGCATAATTAGTAAGCATGGTGGGTTCCGCGCTCCAGATGGAGACTCAGCCAGAGTGAGAGAGAGAGCGACATGGGGAGACCAGTATTTCGAGAAACTGATCCCAATT…	T	intronic	gene-FCHSD2
15	56466304	56466304	T	TCTTCTGTGCCGGGGTCCAGCCCCCGTGGATCCAGGGAATTCGAAGCGGGGACGGCGTTGGCGAGGATCAGGAAACAATTGCTTAATTAAATGTTAATTAAGGATATAAAGAGTAATAGAATGAGGATAGCTCAGTGAGGAAATTCAGTGGAGAAAAGAGGCTGAAATAAGGATAGCTCAGTGAGGAAATTTAGTGCAGAAAAGAGGCTAAATAATTCAGCCAGAAGGTAAGAGAAAGAACGACATGGTGAGACCAAGTTTCGGTGAACAAGGCCCGCACTTTATTTTCCAAAGTAGTTTTTATACCTTAAGTTATGCATAGAGGATAATGGGGGAAGGGGTAGAGTCATGCAGTAAGCCAGGCTTTCTTCCTGCAAACTTATCATGCAAAAGTTTAGG…	intergenic	gene-B3GNT6(dist=9354),gene-CAPN5(dist=6582)
15	60261138	60261138	G	GACATATGTGCCGGGGTCCTGCCCCGGCTGATCCAGGGTATTCGAAGCGGGGACGGCGTCGGCGACCTATTTATTTAAATATTTTATCAAAGATATAAAGAGTAATAGGATGAGGATAGCTCAGTAGGAAAATTCAGTGGAGAAAAGAGGCTGAGTAGCTTGGTTTACGCGGGAGACCAATAAAACTTCAAGACAAGAAGTTTGCACCACTTACGTAGGCCGCAGGCGTCCTTCCGTTCTCCCGAAGGAGAGGAGACACTGAGGCCTCCCCGGTCGGATCTTAGAAGCCCAGGCATAATTAGTAAGCATGGTGGGTTCCGCGCTCCTGATGGAGACTCAACCAGAGTGAGAGAGAGAGCGACATGGGGAGACCAGTATTTCGAGAAACTGATCCCAATT…	intergenic	gene-TRNAC-GCA-184(dist=934890),gene-KCNA4(dist=467441)
15	68034840	68036129	AATATGACTGTTGGGGGCCAAAGTGAGGTACTCCGCTCGTGGCAAAGGTCACGAGGAAGGAGGCTCAACATACGCAAAGGCGGGATCGAGCCTCAGGAGTCCCCCTGGAAATCCTCGAGCATCTACCCCCATAACCAGAGCCTGCCTACTTTACTACTTTGTGCTCTCATCTACACCTGTCACTTTACGGGGGGCTGCCCCCCACCACCTCTTTCGGAGAAGGAGTTAACCTAGAGCTCCAGTTAATAAAAACTCCTGGGCGTGACAAAAGTGTTTTAACCTACAAACTCCTCTGAAGGTTCTCTAGCCTGCCTGACAGGCTTGTCTGGCCACATTGATTGCTCACAGCCTCCCAACCATGAGAGGCACAAGATGCTTTAAACCTTCTAAAAACGGGTT…	A	intergenic	gene-C15H11orf74(dist=945483),NONE(dist=NONE)
15	68213827	68213899	GGGTTGCGTCAGGCAGCAAGCCAGGCTTTCTTCCTGCAAACTACCCTGGATCAGCCGGGGCTGGTCCCCGGCA	G	intergenic	gene-C15H11orf74(dist=1124470),NONE(dist=NONE)
15	68228937	68230232	TAGTTCTGTGCTGGGAGCCGGCGAGAGACATTCCGCTCGTGACAAAGGTCATGAGGAAGGAGGCTCGACATATGCAAAAGTGGGATCGAGCCTCAGGAGTCTCCCCGGATATTCTCGAGTATCTTTCCCCAAAAAACCAGAGTCTGCCTACTTTATTGCTTTGTGCTCTCACCTCTGACTCTACTGGGGGCTGTCCCCTACCACCATCTCGCTCTCTCTGTCAAAGAGTTAACTTACAGCTCCAATTAATAAAGTTCCTGGGCAATTAGGAGTGTTTAAATCCAAACCCCTCAGATGGCTCTCTAGCTCGCCTGACAAGTTTACCCGGACTCCTACAGCTATGCATACAATTGTTTACAGTCTCCCAGCCTCAAGAGGCACGGGAAGCTTAAGGTATTC…	T	intergenic	gene-C15H11orf74(dist=1139580),NONE(dist=NONE)
15	68808264	68808264	T	TGGGGGCCAGAGTGAGGTACTCCACCCGTGACAAAGGTCATGAGGAAGGAGGCTCGACAAACGGAAAGGCGGGATCGAGCCTCAGGAGTCCCCCTGGAACTCCTCGAGCATCTACCCCCATGACCAGAGCCTGCCTACTTTACTACTTTGTGCTCACCTACACCTCTGACTTTACGGGGGGCTGTCCCCCACCACCTCTTTTGGAGAAGGAGTTAACTTAGAGCTCCAGTTTATAATAATTCCTGGGCGTGATAAGAGTGTTTTAACCTACAAACTCCTCTGAAGGTTCTCTGGCCTGCCTGACAGGCTTGTCCGGCCACATGTGATCACTCACAGCCTCCCAACCGTGAGAGGCACAAAATGCTTTAAACCTTCTAAAAACAGGTTCTTTAGAGGAGT…	intergenic	gene-C15H11orf74(dist=1718907),gene-LRRC4C(dist=1589667)
15	69858422	69859716	GGGTTGCTGCCGAGGACCAGCCCCGGCTGATCCAGGGTATTCGAAGGGGAGACGGCGTCGGCGACTATTTATATGCTAATTAGAGATATAGAGAACAATAGAATGAGGATAGCTCAGTAGGAAATTTCAGTGGAGAAAAGAAGCTGAGTAGCTTGGTTTACGCGGGAGACCAATAAAACTTCAAGACAAGAAGTTTGCACCACTTACGTAGGCCGCAGGCGCCCTCTCGAATAGCGGAAGGTGTCTCACCCTAGACACCTTCTCGAGTGGGTCTTAGAAGCCCAGGCATGATTAGTAAGCGTGGTGGGTTCCGCGCTCCAGATGGAGACTCAGCTGGAAGTTAAAAGAATGACATGGGGAGACCAAGCGTTGGTGAGCAAGGCCCGTAGCTTTATTTTT…	G	intergenic	NONE(dist=NONE),gene-LRRC4C(dist=538215)
15	69858536	69858591	CAGTAGGAAATTTCAGTGGAGAAAAGAAGCTGAGTAGCTTGGTTTACGCGGGAGAC	CT	intergenic	NONE(dist=NONE),gene-LRRC4C(dist=539340)
15	69859006	69859110	CTTATCAACAAAGACTTACTTTCTCTAAGAGTAATTATTTCAAGGTTTGGCACCATCTTCCAAAGATAAAATTGCATTCCTATAGGGCGGATGTGTAATGGGTTT	C	intergenic	NONE(dist=NONE),gene-LRRC4C(dist=538821)
15	70915120	70916291	GGGGCAATGCCGGGGACCAGCCCCGGCTGATCCAGGGTATTCGAAGCGGGGACGGCATCGGCGAGGATCAGGAAACAACTGCTTAATTAAACGTTAATTAAGGATATAAAGAGTAATAGAATGAGGATAGCTCAGTAAAATTCAGTGAAGAAAAGAGGCTGAAATAAGGATAGCTCAGTGAGGAAATTCAGTGGAGAAAAGAGGCTGAAATAAGGATAGCTCAGTGAGGAAATTTAGTGCAGAAAAGAGGCTGAATAATTCAGCCAGAAGGTAAGAGAAAGAACGACATGGTGAGACCAAGTTTCGGTGAACAAGGCCCGCACTTTATTTTTCAAAGTAGTTTTTATACCTTAAGTTATGCATAGAGGATAATGAGGGAAGGGGTAGAGTCTTGCAGCA…	G	ncRNA_intronic	gene-LRRC4C-2
15	73130047	73131339	TTGGGGGCCAGAGTGAGGTACTCCGCCCATGGCAAAGGTCATGAGGAAGGAGGCTCGACATACGCAAAGGCGGGATCGAGCCTCAGAAGTCCCCCTGGAAATCCTCGAGCGTCTACCCCCATAACCAGAGCCTGCCTACTTTACTACTTTGTGCTCTTACCTACACCTCTGACTTTACGGGGGGCTGTCCCCCACCACCTCTTTCGGAGAAGGAGTTAACCTAGAGTTCCAGTCAATAAAAACTCTTGGGTGTGACAAGAGTGTTTTAATCTACAAACTCCTCTGAAGGTTCTCTAGCCTGCCTGACAGGCTCATCGGGCCACATGTGATTGCTCACAGCCTCCCAACCGTGAGAGGCACGAGATGCTTTAAACCCTCTAAAAACAGGTTCTTTAGAGA…	T	intergenic	gene-LRRC4C-2(dist=1311965),gene-API5(dist=292465)
15	77982259	77982259	A	AGCAGAACAGTGCCAGGAGCCGGCATATTGCATATTGAGTGCATATTGCATATTGAGTGCAGCACTTTCCACAGCATCATCTTTCAGGATCTGGAATAGCTCAACTGGAATTCTATCACTGCCAGGAGCCAGCGTGAGGAACTCCGCCATGACAAAGGTTATGAGGAAGGAGGCTCAGCATACGCAAAGGTGGGATTGAGCCTCAGGAGTCCCCCTGGAAATTCTCAAGCATCTACCCCCTAAACCAGAGTCTGCCTACTTTCTGCTTTGTGCTTTCACCTACACCTCTGACTTCACAGGGGGGCTGTCCCCCTCTACCTCTCTCTGAAAAAAGAGTTAGCTTACAGCTCCAGTTAATAATTCCTTGGTGTGACAGTGTTTAACCTACAAACTCCTTTG…	intergenic	gene-LOC107131315(dist=9419),gene-LOC509884(dist=9745)
15	77986161	77986161	T	TGGAGTGTGTTGGGGGCCAGAGTGAGGTACTCTGCCTGTGGCAAAGGTCATGAGGAAGGAGGCTCGACATACACAAAGGCGGGATCGAGCCTCAGGAGTCCCCCTGGAAATCCTCGAGCATCTACCCCCATAACCAGAGCCTGCCTACTTTACTACTTTGTGCTCACCTACACCTCTGACTTTACGGGGACCTGTCCCCCACCACCTCTTTCAGAGAAGGAGTTAACTTAGAGCTCAAGTTAATAATAATTCCTGGGCATGATAAGAGTGTTTTAACCTACAAACTCCTCTGAAGGTTCTCTAGCCTGCCTGACAGGCTTGTCTGGCCACATGTGATTGCTCACAGCCTCCCAACCATGAGAGGCACGAGATGCTTTAAACCTTCTAAAAACAGGTTCC…	intergenic	gene-LOC107131315(dist=13321),gene-LOC509884(dist=5843)
15	78174938	78176243	GGAATGGTGTTGGGGGCCAGAGTGAGGCACTCCGCCCGTGGCAAAGGTCATGAGGAAGGAGGCTCGACATATGCAAAGGCGGGATCGAGCCTCAGGAGTCCCCCTGGAAATCCTCGAGCATCTACCCCCATAACCAGAGCCTGCCTACTTTACTACTTTGTGCTCTCACCTACACCTCTGACTTTACGGGGGGCTGTCTTACCCCACCACCTCTTTCGGAGAAGGAGTTAACTTAGAGCTCCAGTTAATAAAAACTGCTGGGCGTGACAAGAGTGTTTTAACCTACAAACTCCTCTGAAGGTTCTCTAGCCTGCCTGACAGGCTTGTCTGGCCACATGTGATTGCTCACAGCCTCCCAACTGTGAGAGGCACGAGATGCTTTAAACCTTCTAAAAACAG…	G	intergenic	gene-OR4C13(dist=23123),gene-LOC785997(dist=4704)
15	78861196	78862490	AAGGTGTGTGCCGGGGACCAGCCCCGGCTGATCCAGGGTATTCGAAGGAGAGACGGCATAGGCGAGGATCAGGATACAATAGCTTCAATTAGATATTAATTAAAGATATAAAGAGTAATAGAATAAGGATAGCTCAGTAGGAAAATTCAGTGGAGAAAAGAGGCTGAGTAGCTTGGTTTACGCGGGAGACCAATGAAACTTCAAGACAAGAAGCTTGCACCACTTACGTAGGCCGCAGGCGTCCTTCCGTTCTCCCGAAGGAGAGGAGACACTGAGGCCTCCCCGGTCGGATCTTAGAAGCCCAGGCAAAATTAGTAAGCATGGTGGGTTCCGCGCTCCAGATGGAGACTCAACCAGAGTGAGAGAGAGAGAGCGACATGGGGAGACCAGTATTTCGAG…	A	intergenic	gene-LOC615051(dist=25090),gene-LOC100139830(dist=150821)
15	79242832	79244126	GACTTTAGTGAGGGGGACCAGCCCCGGCTGATCCAGGGTATTCGAAGGAGAGACGGCGTCGGCGAGGGTCAGGATACGATAGTTTCAATTAGATATTAATTAGAGATATAAAGAGTAATAGAATAAGGATAGCTCAGTAGGAAAATTCAGTGGAGAAAAGAGGCTGAGTAGCTTGGTTTACGCGGGGGACCAATAAAACTTCAAGACAAGAAGCTTGCACCACTTACGTAGGCCGCAGGCGTCCTTCCGTTCTCCCGAAGGAGAGGAGACACTGAGGCCTCCCCGGTCGGATCTTAGAAGCCCAGGCATAATTAGTAAGCATGGTGGGTTCCGCGCTCCAGATGGAGACTCAGCCAGAGTGAGAGAGAGAGCGACATGGGGAGACCAGTATTTCGAGAA…	G	exonic	gene-LOC507377
15	79977312	79977312	A	AAAGGAAATCAACCCCAAATATTCAATGGAAAAATTGATACTGAAGCTCCAATACTTTGGCCACCTGATGTGAAGAACTGACTTGCCGGGGTCCAGCCCTGGCTGATCCTGGGTATTCGAAGGAGAGACGGCATCGGCGACTTATTTAAATATTAATTAGAGATATAAAGAGGAATGAGGATAGCTCAGTAGGAAAATTCAGTGGAGAAAAGAGGCTGAGTAGCTTGGTTTACGCGGAAAATCAATATAACCTGTGACACCAGATTAGCTCTGACCACGGAGGCTGCAGGCGCCCTCTCGAATAGCAGAAGGTGCCCCACCTTAGACACCTTCTCGAGTGGATTTTAGAAGCCCAGGCAAATAAATGGTCGCAGAGGACCTCCACGCTCCAGATGGAAA…	intergenic	gene-LOC100301259(dist=32227),gene-LOC519616(dist=16902)
15	80157843	80157843	T	TACAGAACTGCCGGGGACCAGCCCCGGCTGAACCAGGGTATTCGAAGGAGAGACGGCGTAGGCGAAGATCAGGAAACAATTGCTTAATTAAATGTTAATTAAGGATATAAAGAGTAATAGAATGAGGATAGCTCAGTAGGAAAATTCAGTGAAGAAAAGAGGCTGAAATAAGGATAGCTCAGTGAGGAAATTCAGTGGAGAAAAGAGGCTGAATAATTCAGCCAGAAGGTAAGAGAAAGAACGACATGGTGAGACCAAGTTTCGGTGAACAAGGCCCGCACTTTATTTTTCAAAGTAGTTTTTATACCTTAAGTTATGCACAGAGGATAATGGGGGAAGGGGTAGAGTCTTGCAGCAAACCAGGCTTTCTTCCTGCAAACTTATCATATGCAAAAGCTT…	intergenic	gene-LOC521081(dist=36464),gene-LOC782792(dist=2648)
15	81344195	81345485	CCACATGTTGGGGGCCAGAGTGAGGTACTCCACCCGTGACAAAGGTCATGAGGAAGGAGGCTCGACATACACAAAGGCAGGATCGAGCCTCAGGAGTCCCCCTGGAAATCCTTGAGCATCTACCCCCATAACCAGAGCCTGCCTACTTTACTACTTTGTGCTCTCACCTACACCTCTGACTTTACGGGGGGCTGTCCCCCACCACCTTTTTTGGAGAAGGAGTTAACTTAGAGCTCCAGTTAATAATAATTCCTGGGCGTGGTAAGAGTGTTTTAACCTACAAACTCCCCTGAAGGTTCTCTAGCCTGCCTGACAGGCTTGTCCGGCCACATGTGATCACTCACAGCCTCCCAACCGTGAGAGGCACGAGATGCTTTAAACCTTCTAAAAACAGGTTCC…	C	intergenic	gene-LOC615808(dist=38931),gene-OR9Q2(dist=25717)
15	81429851	81429851	G	GACCTAGTGCCGGGGACCAGCCCCGGCTGAACCAGGGTATTCGAAGGAGAGACGGAGTAGGCGAAGATCAGGAAACAATTGCTTAATTAAATGTTAATTAAGGATATAAAGAGTAATAGAATGAGGATAGCTCAGTAGGAAAATTCAGTGAAGAAAAGAGGCTGAAATAAGGATAGCTCAGTGAGGAAATTCAGTGGAGAAAAGAGGCTGAATAATTCAGCCAGAAGGTAAGAGAAAGAACGACATGGTGAGACCAAGTTTCGGTGAACAAGGCCCGCACTTTATTTTTCAAAGTAGTTTTTATACCTTAAGTTATGCACAGAGGATAATGGGGGAAGGGGTAGAGTCTTGCAGCAAACCAGGCTTTCTTCCTGCAAACTTATCATATGCAAAAGCTTA…	intergenic	gene-LOC104974344(dist=8504),gene-LOC531571(dist=14803)
15	81619566	81619566	C	CCTTCTGTGCCGGGGACCAGCCCCGGCTGATCCAGGGTATTCGAAGGAGAGACGGCATAGGCGAGGATCAGGATACGATAGCTTCAATTAGGTATTAATTAAAGATATAAAGAGTAATAGAATAAGGATAGCTCAGTAGGAAAATTCAGTGGAGAAAAGAGGCTGAGTAGCTTGGTTTACGCGGGAGACCAATAAAACTTCAAGACAAGAAGTTTGCACCACTTACGTAGGCCGCAGGCGTCCTTCCGTTCTCCCGAAGGAGAGGAGACACTGAGGCCTCCCCGGTCGGATCTTAGAAGCCCAGGCATAATTAGTAAGCATGGCGGGTTCCGCGCTCCAGATGGAGACTCAGCCAGAGTGAGAGAGAGAGCGACATGGGGAGACCAGTATTTCGAGAAA…	intergenic	gene-OR5B3(dist=3894),gene-LOC513948(dist=10345)
15	81769673	81769673	A	AAGTGCGGGGAGCGAGCTCCGCCTCTGGCAAAGGTCATGAGGAAGGAGGCTTGGCATACGCAAAGGCGGGATCAAGCCTCAGGAGTCTCCCTGGAAATTCTCGAGCAATCTACCCCCAAAACCAGAGTCTGCCTACTTTCTGCTTTGTGCTTTCACCTACACCTCTGACTTTACGGGGGGCTGTCCCCCACTACCTCTCTGAAAAAAGTTAGCTTACAGCTCCAGTTAATAATTCCTGGGTGTGACAGTGTTTAACCTACAAACTCCTTTGGAAATCGTCTAGCCTGCCTGAATAGGTTTTTCCGGCCACATGTGATTGTTCAGAGCCTCCCAACTGTGAGAGGCAGGAGATGTTCTAAACTGTCTAAACACAGATTCTTTTGAGTAGTTAAAAGATTG…	intergenic	gene-LOC515045(dist=1793),gene-LOC100301403(dist=9527)
15	82658138	82658138	A	ATTCAGCCTCTTTTCTCCACTAAATTTCCTCACTGAGCTATCCTTATTTCAGCCTCTTTTCTCCACTGAATTTCCTCACTGAGCTATCCTTAT	intergenic	gene-OR5A1(dist=2873),gene-OR4D6(dist=7497)
16	176183	176183	C	CCGTCAGTGATCACGTGGCTGATCATGCACTGATATCGTGACTGAGCATGCACTGATCATGTGCCGGGAGCCGGGGAGGCATTCAACTCTGGACAAAGGTCATGAGGAAGGAGGCTCGGCATACGCAAATGCGGGATCGAGCCTCAGGAGTCCACCCGGTTATTCTCGAGCATCTCCCCCCCAAAAACACCAGAGTCTGCCTACTGTATTGCTTTGTGCACTCACCTCTGATTTCACTGGCGGCTGTCCCCCACCACCTTCTCGCTCTCTCTGTCAAAGAGTTAACTTACAGCTCCAATTCATAAAGTTCCTTGTCATTCTTCCCTTTAACTTCCAGCTGAGTCTCCATCTGGAGCACGGAACCCACCACCCTTACTAATTATGCCTGGGCTGCTAAGA…	intergenic	NONE(dist=NONE),gene-OR5L1(dist=327291)
16	177223	177224	AC	ATGACGTGGCTGCTCAGGCACTGATCACATGGCTCATCATGCACTGATCACATGTTTATCAGGCAATGATCAGTGACTGACAGGGGCTGATCATGGGACTGTGCACGCACTCATCACGTGGCTATCATGCACTGATCACGTGACTCCGCATACACTGATGACGTGGCTGCTCAGGCACTGATCACATGGCTCATCATGCACTGATCACGTGTTTATCAGGCAATGATCAGTGACTGACAGGCGCTGATCATGGGACTGTGCACGCACTGATCAGGTGGCTGATCAGGAACTGACCACCTGACTGAGCATGCAGTGATCACGTGGCTGGTCGTCACTGATCACGTTTTTATCATACGGTGATCACGGGACTGAGAGGCGCTGATCACGTGACTGTGCCGT…	intergenic	NONE(dist=NONE),gene-OR5L1(dist=326250)
16	184186	184186	T	TGCCGTCAGTGATCACGTGGCTGATCATGCACTGATATCGTGACTGAGCATGCACTGATTATGTGCCGGGAGCCGGGGAGGCATTCCACTCTGGACAAAGGTCATGAGGAAGGGGGCTCGGCATACGCAAATGCGGGATCGAGCCTCAGGAGTCCACCCGGTTATTCTCGAGCAACTCCCCCCCAAAAGAACCAGAGTCTGCCTACTGTATTGCTTTGTGCTCTCACCTCTGATTTCACTGGGGGCTGTCCCCCACCACCATCTCGCTCTCTCTGTCAAAGAGTTAACTTACAGCTCCAATTCATAAAGTTCCTTTTCATTCTTCCCTTTAACTTCCAGCTGAGTCTCCATCTGGAGCGCAGAACCCACCACCCTTACTAATTATGCCTGGGCTGCTAA…	intergenic	NONE(dist=NONE),gene-OR5L1(dist=319288)
16	185759	185759	A	ACGCACTGATCAGGTGGCTGATCAGGAACTGACCACCTGACTGAGCATGCAGTGATCACGTGGCTGGTCGTTCACTGATCACGTTTTTATCATACGGTGATCACGGGACTGAGAGGCGCTGATCACGTGACTGTGCCGTCAGTGATCACGTGGCTGATCATGCACTGATATCGTGACTGAGCATGCACTGATCATGTGCCGGGAGCCGGGGAGGCCTTCCATTCTGGACAAAGGTCATGAGGAAGGAGGCTCGGCATACGCAAATGCGGGATCGAACCTTAGGAGTCCACCCGGTTATTCTCGAGCATCTCCCCACCAAAAAAACCAGAGTCTGCCTACTGTATTGCTTTCTGCTCTCACCTCTGATTTCACTGGGGGCTGTCCCCCACCACCATCTCG…	intergenic	NONE(dist=NONE),gene-OR5L1(dist=317715)
16	187074	187074	C	CTCAGCAGGCCCTGATCACGTGACTCTGCAGGCACTGATCCCGTGGCTGATCAAGTACAGATCTCGTGACTGAGCATGCACTGATCACGTGGCTATCATGCACTGATCACGTGACTGCGCATACACTAATGACGTGGCTGCTCAGGCACTGATCACATGGCTCATCATGCACTGATCACGTGTTTATCAGGCAATGATCAGTGACTGACAGGCGCTGATCATGGGACTGTGCACGCACTGATCACGTGGCTATCATGCACTGATCACGTGTCTGTGCATACACTGATGACGTGGCTGTTCGGGCACTGATCACCTGTTTATCAGGCATTGATCAGTGACTGACAGGCGGTGATCCTGGGACTGTGCACGCACTGATCAGGTGGCTGATCAGGAACTGAC…	intergenic	NONE(dist=NONE),gene-OR5L1(dist=316400)
16	898606	899908	GGGTCAGTGTTGGGGGCCAGAGTGAGGTACTCCGCCCGTGACAAAGGTCATGAGGAAGGAGGCTCGACATACGCAAAGGCGGGATCGAGCCTCAGGAGTCCCCCTGGAACTCCTCGAGCATCTACCCCCATAACCAGAGCCTGCCTACTTTACTACTTTGTGCTCACCTACACCTCTGACTTTACGGGGGGCTGTCCCCCACCACCTCTTTTGGAGAAGGAGTTAACTTAGAGCTCCAGTTTATAATAATTCCTGGGCGTGATAAGAGTGTTTTAACCTACAAACTCCTCTGAAGGTTCTCTAGCCTGCCTGACAGGCTCGTCCGGCCACATGTGATTGCTCACAGCCTCCCAACCGTGAGAGGCACAAGATGCTTTAAACCCTCTAAAAACGGGTTCT…	G	intergenic	gene-MYOG(dist=98211),gene-ADORA1(dist=15615)
16	2491141	2491525	CTAAAGAAGCAGATATGGCAGTGTATTGATTAATATAGTTGGTGTAAATAGTAGCTTTAATGTTTGTAACCTGGGACCCTTGAGTTAATTCTTTTTCTTGTTATAGCCCACCACACCTTTGCTCTGTAGGAATGCAACTTTATCTAATGCTTTTTGGAGGCTGGCGCCTGACTTGAGAATAATCACCTTTAGAGAAAAAGGCCTCCGGGCCAGAAGATGATGCAAATCACCTAAACTTTTGCATATGATAAGTTTGCAGGAAGAAAGCCTGGCTTACTGCAGGACTCTACCCCTTCCCCCATTATCCTCTATGCATAACTTAAGGTATAAAAACTACTTTGGAAAATAAAGTGCGGGCCTTGTTCACCGAAAAAAAAAAAAAAAA	C	intergenic	gene-LRRN2(dist=129711),gene-NFASC(dist=113959)
16	3698565	3698825	GAGGTGAGTAAAACTGTGTGGTAGTTAGAACATTCTTTGGCATTGCCTTTCTTTGGGATTGGAATGAAAGCTGAATTTTTCCAGTCCTGTGGCCACTGCTGAGTTTTCCAAAGTTGCTGGCATATTGAGTGCAGCTCTTTGATAGCATCATCTTTTAGGATTTGAAATAGCTCAACTGGAATTCCATCATCTCCACTAGCTTTGTTCACAGTAATACTTCCTAAGGCCCACTTGGCTTTGCATTCCAGGATGTCTGGCTCT	G	intergenic	gene-SLC26A9(dist=27939),gene-RAB7B(dist=30175)
16	7477606	7477606	T	TGAAATGTGCCGGGGACCAGCCCCGGCTGATCCAGGGAATTCGAAGCGGGGACGGCGTCGGCGAAGATCAGGAAACAATTGCTTAATTAAACGTTAATTAAGGATATAAAGAGTAATAGAATGAGGATAGCTCAGTAGGAAAATTCAGTGGAGAAAAGAGGCTGAAATAAGGATAGCTCAGTGAGGAAATTCAGTGGAGAAAAGAGGCTGAATAATTCAGCCAGAAGGTAAGAGAAAGAACGACATGGTGAGACCAAGTTTCGGTGAACAAGGCCCGCACTTTATTTTCCAAAGTAGTTTTTATACCTTAAGTTATGCATAGAGGATAATGGGGGAAGGGGTAGAGTCATGCAGTAAGCCAGGCTTTCTTCCTGCAAACATATCATATGCAAAAGTTTA…	intergenic	gene-LOC112441816(dist=454433),gene-LOC789494(dist=1440017)
16	9986694	9986694	G	GAAATCCTGCCAGGGTCCAGCCCCGGTGGATCCAGGGAATTCGAAGCGGGGACGGCGTCGGCGAGGATCAGGAAACAATTGCTTAATTAAACGTTAATTAAGGATATAAAGAGTAATAGAATGAGGATAGCTCAGTGAGGAAATTCAGTGGAGAAAAGAGGCTGAAATAAGGATAGCTCAGTGAGGAAATTCAGTGGAGAAAAGAGGCTGAATAATTCAGCCAGAAGGTAAGAGAAAGAACGACATGGTGAGACCAAGTTTCGGTGAACAAGGCCCACACTTTATTTTCCAAAGTAGTTTTTATACCTTAAGTTATGCATAGAGGATAATGGGGGAAGGGGTAGAGTCATGCAGTAAGCCAGGCTTTCTTCCTGCAAACTTATCATATGCAAAAGTTTA…	intergenic	gene-TRNAK-UUU-23(dist=276885),NONE(dist=NONE)
16	10161378	10165868	GACAGTGCTATGCCGGGGACCAGCCCCGGCTGATCCAGGGTATTCGAAGGAGAGACGGCGTAGGCGAAGATCAGGATACAATAGCTTCAATTAGATATTAATTAAAGATATAAAGAGTAATTGAATAAGGATAGCTCAGTAGGAAAATTCAGTGGAGAAAGGAGGCTGAGTAGCTTGGTTTACGCGGGGGACCAATAAAACTTCAAGACAAGAAGCTTGCACCACTTACGTAGGCCGCAGGCGTCCTTCCGTTCTCCCGAAGGAGAGGAGACACTGAGGCCTCCCCGGTCGGATCTTAGAAGCCCAGGCATAATTAGTAAGCATGGTGGGTTCCGCGCTCCAGATGGAGACTCAGCCAGAGTGAGAGAGAGAGCGACATGGGGAGACCAGTATTTCGAG…	G	intergenic	gene-TRNAK-UUU-23(dist=451569),gene-CDC73(dist=1861150)
16	10470765	10470765	C	CCTTAACTGCGGGGAGCCGCCCATGAGAACGGGGTCCTTTGTCCGAAGGACACAGCTCTGGGAGCTGCCTCAGTCCTTGAGGGTTTGCTTGCAAACATAGCTCTCTGTCCCGCCACCCCAGAGATTAGGCGCTTATTTACTGCAGGCACCTGGAGTTCTGTGCAAACTTCTCACGCACAGAGAAATGTTATCTGGTGTAAGAAATAATAACAGGGTGCCATTCCCATGCTCTCAAGATTTCTTGTGACTGTAAGATGTATAGGCCAACCAAGAAAAAATGTCAACTGTCTTGTCTTTCTCACGTTTTTCTGTATAAATATGAGATGCTGAATAAAGTTGGTGTCAGACTGCGTCCCTTCATGGAGACGTGTCTGAACCTCTCGACCCCATCTTTGTTGT…	intergenic	gene-TRNAK-UUU-23(dist=760956),gene-CDC73(dist=1556253)
16	11874898	11875771	TTTGCCGGGGACCAGCCCCGGCTGATCCAGGGTATTCGAAGGAGAGACGGCGTAGGCGAAGATCAGGAAACAATTGCTTAATTAAATGTTAATTAAGGATATAAAGAGTAATAGAATGAGGATAGCTCAGTAAAATTCAGTGAAGAAAAGAGGCTGAAATAAGGATAGCTCAGTGAGGAAATTCAGTGGAGAAAAGAGGCTGAATAATTCAGCCTGAAGGTAAGAGAAAGAACGACATGGTGAGACCAAGTTTCGGTAAACAAGGCCCGCACTTTATTTTTCAAAGTAGTTTTTATACCTTAAGTTATGCACAGAGGATAATGGGGGAAGGGGTAGAGTCTTGCAGCAAACCAGGCTTTCTTCCTGCAAACTTATCATATGCAAAAGCTTAGGTGATTT…	T	intergenic	NONE(dist=NONE),gene-CDC73(dist=151247)
16	11875780	11876012	AGGAATTATTAACTGGAGCTGTAAGCTAACTTTTTTCAGAGAGGTAATGGGGGACAGCCCCCCGTAAAGTCAGAGGTGTAGGTGAAAGCACAAAGCAGAAAGTAGGCAGACTCTGGTTTTGGGGGTATATGCTCGAGAATTTCCAGGGAGACTCCTGAGGCTTGATCCCGCCTTTGCGTATGCCAAGCCTCCTTCCTCATGACCTTTGCCAGAGGCGGAGCTCGCTCCCCGCA	AT	intergenic	NONE(dist=NONE),gene-CDC73(dist=151006)
16	12976463	12980816	TGAGAAAAATCAAATCAATAAAATTAGAAATGAAACTGGAGAGATCACAACAGACAACACAGAAATACAAAGGATCATAAGAGACTACTATCAACAATTATATGCCAATAAAATGGACAACGTGGAAGAAATGGACAAATTCTTAGAAAAGTACAACTTTCCAAAACTCGACCAGGAAGAAATAGAAAACCTTAACAGATGCATCACAAGCATGGAAATTGAAACTGTAATCAGAAATCTTCCAGCAAACAAAAGCCCAGGTCCAGACGGCTTCACAGCTGAATTCTACCAAAAATTTAGAGAAGAGCTAACACCTATCCTTCTCAAACTCTTCCAGAAAATTGCAGAGGAAGGCAAACTTCCAAACTCATTCTATGAGGCCACCATCACCCTAATACC…	T	intergenic	gene-RGS21(dist=54737),gene-RGS18(dist=138003)
16	13310465	13310465	T	TAGATCATTGCCGGGGACCAGCCCCGGCTGATCCAGGGTATTCGAAGGAGAGACGGCGTAGGCGAAGATCAGGAGACAATTGCTTAATTAAATGTTAATTAAGGATATAAAGAGTAATAGAATGAGGATAGCTCAGTAAAATTCAGTGAAGAAAAGAGGCTGAAATAAGGATAGCTCAGTGAGGAAATTCAGTGGAGAAAAGAGGCTGAATAATTCAGCCAGAAGGTAAGAGAAAGAACGACATGGTGAGACCAAGTTTCGGTGAACAAGGCCCGCACTTTATTTTCCAAAGTAGTTTTTATACCTTAAGTTATGCATAGAGGATAATGGGGGAAGGGGTAGAGTCATGCAGTAAGCCAGGCTTTCTTCCTGCAAACTTATCATATGCAAAAGTTTAGG…	intergenic	gene-RGS18(dist=158915),gene-BRINP3(dist=1831471)
16	14335377	14336487	TAGCTGGTGCCGGGGACCAGCCCCGGCTGATCCAGGGTATTCGAAGCGGGGACGGCGTCGGCGAGGATCAGGAAACAACTGCTTAATTAAACGTTAATTAAGGATATAAAGAGTAATAGAATGAGGATAGCTCAGTGAAGAAATTCAGTGGAGAAAAGAGGCTGAAATAAGGATAGCTCAGTGAGGAAATTCAGTGGAGAAAAGAGGCTGAATAATTCAGCCAAAACGACATGGTGAGACCAAGTTTCGGTGAACAAGGCCCGTACTTTATTTTCCAAAGTAGTTTTTATACCTTAAGTTATGCATAGAGGATAATGGGGGAAGGGGTAGAGTCAGGCAGCAAACCAGGCTTTCTTCCTGCAAACTTAGCATATGCAAAAGTTAGGTGATTTGCATCAT…	T	intergenic	gene-RGS18(dist=1183827),gene-BRINP3(dist=805449)
16	14998596	14999795	TACTCTATTGCCGGGGTCCAGCCTTGGCTGATCTAGGGTATTGAAAGGAGAGACGGCATAGGCGAAGATCAGGAAACAATTGCTTAATTAAACGTTAATTAAGGATATAAAGAGTAATAGAATAAGGATAGCTCAGTGAGGAAATTCAGTGGAGAAAAGAGGCTGAATAATTCAGCCAGAAGGTAAGAGAAAGAACGACATGGTGAGACCAAGTTTCGGTGAACAAGGCCCGCACTTTATTTTCCAAAGTAGTTTTTATACCTTAAGTTATGCATAGAGGATAATGGGGGAAGGGGTAGAGTCAGGCAGCAAGCCAGGCTTTCTTCCTGCAAACTTATCATATGCAAAAGCTTAGGTGATTTGCATCATCTTCTGGCCCGGAGGCCTGTTAACATTTTA…	T	intergenic	gene-RGS18(dist=1847046),gene-BRINP3(dist=142141)
16	17537608	17538902	TTGCCGAGGACCAGCCCCGGCTGATCCAGGGTATTCGAAGGGGAGACGGCGTCGGCGACCTATTCAAATGGTAATTAGAGATATAAAGAGTAATAGAATGAGGATAGCTCAGTAGGAAAATTCAGTGGAGAAAAGAGGCTGAGTAGCTTGGTTTACGCGGAAAATCAATATAACCCGTGACACCAGGTTAGCTCTGACCATGGAGGCCGCAGGCGCCCTCTCGAATAGCGGAAGGTGCCCCACCTTAGTCACCTTCTCGAGTGGGTCTTAGAAGCCCAGGCAAATAAGTGGTCGCAGAGGATATCCACGCTCCAGATGGAGACTTCAGCCGGAAGTTAAAGGAAAGAATGACATGGGGAGACCAAGCATTGGTGAGCAAGACCCCTAGCTTTATTTTTA…	T	intergenic	gene-BRINP3(dist=1906468),gene-LOC529930(dist=62094)
16	18004726	18004726	C	CCAGGGATCTGCTGGGGACCAGCCCCAGCTGATCCAGGGTATTCGAAGGAGAGACGGCCTAGGCGACTATTTATATGCTAATTAGAGATATAGAGAACAATAGAATGAGGATAGCTCAGTAGGAAAATTCAGTGGAGAAAAGAAGCTGAGTAGCTTGGTTTACGCGGGAGACCAATAAAACTTCAAGACAAGAAGTTTGCACCACTTACGTAGGCCGCAGGCGCCCTCTCGAATAGCGGAAGGTGTCTCACCCTAGACACCTTCTCGAGTGGGTCTTAGAAGCCCAGGCATGATTAGTAAGCGTGGTGGGTTCCGCGCTCCAGATGGAGACTCAGCTGGAAGTTAAAGGGAAGAATGACATGGGGAGACCAAGCGCTGGTGAACAAGGCCCGTAGCTTT…	intergenic	gene-LOC529930(dist=214293),gene-KCTD3(dist=814083)
16	18767913	18767913	T	TACCATATTGCCGGGGACCAGCCCCGGCTGATCCAGGGTATTCGAAGCGGGGACGGCGTCGGCGAGGATCAGGAAACAACTGCTTAATTAAACGTTAATTAAGGATATAAAGAGTAATAGAATGAGGATAGCTCAGTGAAGAAATTCAGTGGAGAAAAGAGGCTGAAATAAGGATAGCTCAGTGAGGAAATTCAGTGGAGAAAAGAGGCTGAATAATTCAGCCAGAAGGTAAGAGAAAGAACGACATGGTGAGACCAAGTTTCGGTGAACAAGGCCCGCACTTTATTTTTCAAAGTAGTTTTTATACCTTAAGTTATGCACAGAGGATAATGGGGGAAGGGGTAGAGTCTTGCAGCAAACCAGGCTTTCTTCCTGCAAACTTATCATATGCAAAAGCTT…	intergenic	gene-LOC529930(dist=977480),gene-KCTD3(dist=50896)
16	27811428	27818366	GGCCTGGTGCCGAGGACCAGCCCCGGCTGATCCAGGGTATTCGAAGGGGAGACGGCGTCGGCGACTATTTATATGCTAATTAGGGATATAGAGAACAATAGAATGAGGATAGCTCAGTAGGAAATTTCAGTGGAGAAAAGAAGCTGAGTAGCTTGGTTTACGCGGGAGACCAATAAAACTTCAAGACAAGAAGTTTGCACCACTTACGTAGGCCGCAGGCGCCCTCTCGAATAGCGGAAGGTGTCTCACCCTAGACACCTTCTCGAGTGGGTCTTAGAAGCCCAGGCATGATTAGTAAGCGTGGTGGGTTCCGCGCTCCAGATGGAGACTCAGCTGGAAGTTAAAAGAATGACATGGGGAGACCAAGCGTTGGTGAGCAAGGCCCGTAGCTTTATTTTT…	G	intronic	gene-CNIH3
16	28033481	28034535	TATTTGGGTGTGGGGAGCGAGCTCCGCCCCTGGCAAAGGTCATGAGGAAGGAGGCTTGGCATACGCAAAGGCGGGATCAAGCCTCAGGAGTCTCCCTGGAAATTCTCGAGCAATCTACCCCCAAAACCAGAGTCTGCCTACTTTCTGCTTTGTGCTTTCACCTACACTTCTGACTTTACGGGGGGCTGTCCCCCACTACCTCTCTGAAAAATGAGTTAGCTTACAGCTCCAGTTAATAATTCCTGGGTGTGACAGTGTTTCAACCTACAAACTCCCTTGGAAGTCCTCTAGCCTGCTTGAATAGGTTTTTCTGGCCACATGTGATTGCTCAGAGCCTCCAAACTGTGAAAGGCATGAGATGTTCTAAACTGTCTAAATACAGATTGCTTTGAGCAGTTA…	T	intergenic	gene-CNIH3(dist=157687),gene-LOC785251(dist=26927)
16	34368948	34368949	AC	ATCTAGGGTGCGGGGAGCCGGTGAGGCATTCCACTCATGACAAAGGTCATGAGGAAGGAGGCTCGGCATACGCAAAGGCGGGATTGAGCCTCAGGAGTCCCCCCGGATATTCTCGAGCATTTTCCCCCAAAAAACCAGAGTCTGCCTACTTTATTGCTTTGTGCTCTCACCTCTGACTTTACTGGGGGCTGTCCCCTACCACCATCTCTCTCTCTCTCTGTCAAAGAGTTAACTTACAGCTCCAATTAATAAAGTTCCTGGGCAATTAGGAGTGTTTAAATCCAAACCCCTCTGATGGCTCTCTAACTCGCCTGACAAGTTTACCCGGACTCCTGCAGCTATGCATACGATTGTTTACAGTCTCCTAGCCTCCAGAGGCACGGGAAGCTTAAGATATTC…	intergenic	gene-CEP170(dist=353088),gene-PLD5(dist=60464)
16	35574903	35576201	CCAGTATTGCGGGGAGCCGGTGAGGCATTCCACTCATGACAAAGGTCATGAGGAAGGAGGCTCGGCATACGCAAAGGCGGGATCGAGCCTCAGGAGTCCACCCGGATATTCTCGAGCATTTTCCCCCAAAAAAACCAGAGTCTGCCTACTTTATTGCTTTGTGCTCTCACCTCTGACTTTACTAGGGGCTGTCCCCTACCACCATCTCACTCTCTCTCTGTCAAAGAGTTAACTTACAGCTCCAATTAATAAAGTTCCTGGGCAATTAGGAGTGTTTAAATCCAAACCCCTCAGATGGCTCTCTAACTCGCCTGACAAGTTTACCCGGACTCCTGCAGCTATGCATACGATTGTTTACAGTCTCCTAGCCTCCAGAGGCACGGGAAGCTTAAGATATTC…	C	intronic	gene-RGS7
16	38388371	38389669	GCCTGGCTGTTGGGGGCCAGAGTGAGGTACTCCGCCCATGGCAAAGGTCATGAGGAAGGAGGCTCGACATACGCAAAGGCGGGATCGAGCCTCAGGAGTCCCCCTGGAAATCCTCGAGCGTCTACCCCCATAACCAGAGCCTGCCTACTTTACTACTTTGTGCTCTTTCCTACATCTCTGACTTTACAGGGGGCTGTCCCTCACCACCTCTTTCGGAGAAGGAGTTAACCTAGAGCTCCAGTCAATAAAAACTCTTGGGTGTGACAAGAGTGTTTTAACCTACAAACTCCTCTGAAGGTTCTCTAGCCTGCCTGACAGGCTCGTCGGGCCACATGTGATTGCTCACAGCCTCCCAACCGTGAGAGGCACGAGATGCTTTAAATCCTCTAAAAACAGGTT…	G	intergenic	gene-PRRX1(dist=110360),gene-MROH9(dist=129864)
16	39121595	39121595	C	CCTATTGTGCCGGGGACCAGCCCCGGCTGATCCAGGGTATTCGAAGGAGAGACCGCATAGGCGAAGATCAGGAAACAATTGCTTAATTAAATGTTAATTAAGGATATAAAGAGTAATAGAATGAGGATAGCTCAGTAAAATTCAGTGAAGAAAAGAGGCTGAAATAAGGATAGCTCAGTGAGGAAATTCAGTGGAGAAAAGAGGCTGAATAATTCAGCCAGAAGGTAAGAGAAAGAACGACATGGTGAGACCAAGTTTCGGTGAACAAGGCCCGCACTTTATTTTCCAAAGTAGTTTTTATACCTTAAGTTATGCATAGAGGATAAGGGGGGAAGGGGTAGAGTCTTGCAGCAAACCAGGCTTTCTTCCTGCAAACTTATCATATGCAAAAGCTTAGGT…	intergenic	gene-MYOC(dist=9703),gene-VAMP4(dist=20653)
16	39298628	39298628	T	TCCCATGTGCCAAGGACCAGCCCCGGCTGATCCAGGGTATTCGAAGGGGAGACGGCGTCGGCGACTATTTATAAGCTAATTAGAGATATAGAGAACAATAGAATGAGGATAGCTCAGTAGGAAAATTCAGTGGAGAAAAGAAGCTGAGTAGCTTGGTTTACGCGGGAGACCAATAAAACTTCAAGACAAGAAGTTTGCACGACTTACGTAGGCCGCAGGCGCCCTCTCGAATAGCGGAAGGTGTCTCACCCTAGACACCTTCTCGAGTGGGTCTTAGAAGCCCAGGCATGATTAGTAAGCGTGGTGGGTTCCGCGCTCCAGATGGAGACTCAGCTGGAAGTTAAAAGAAAGAATGACATGGGGAGACCAAGCGTTGGTGAGCAAGGCCCGTAGCTTTAT…	intronic	gene-DNM3
16	53945833	53947131	GGGATATTGCCGGGGACCAGCCCCAGCTGATCCAGGGTACTCGAAGGAGAGACGGCGTCGGCGAGGGTCAGGATACGATAGTTTCAATTAGATATTAATTAGAGATATAAAGAGTAATAGACTAAGGATAGCTCAGTAGGAAAATTCAGTGGAGAAAAGAGGCTGAGTAGCTTGGTTTACGCGGGGGACCAATAAAACTTCAAGACAAGAAGCTTGCACCACTTACGTAGGCCGCAGGCGTCCTTCCGTTCTCCCGAAGGAGAGGAGACACTGAGGCCTCCCCGGTCGGATCTTAGAAGCCCAGGCAAAATTAGTAAGCTTGGTGGGTTCCGCGCTCCAGATGGAGACTCAGCCAGAGGGAGAGAGAGACATGGGGAGACCAGTATTTTGAGAAACTGA…	G	intergenic	gene-PRDM2(dist=23968),gene-PDPN(dist=63670)
16	60641552	60641552	T	TTCACTTAGTTAATTTTTTTTTTTTTTTTTGCCCTTACACACATTAATGAATATATAGAAGAAATAAGTATTAACCTTTGATATTAATCACGTTAGACCTTAGGCTAAGTAAATTCTTTCCTTAACTAAAACCCACTACACCCTCACCCTATAGGAATGTAACTTTATTTGAGTGGCGTCTGTTTTAAGAATAATCACCCCTGGAGAAATAAGTGTCCTGGTTGACTGACCGCTGTCACAAGGAGAGGGTCATAAATTGTCAGCAGGCCCCCCCCCCCCCGGCCAGAAGATGATGTAACACCCCTAAGACCTCTGTATACATTTGTATGAAGCACCTGACTTTAATAAAAGTCAGGACTGCTGTCCCCACGTGACTTTTGTATAACATCTCAGTGTATA…	intronic	gene-SOAT1
16	62970175	62970313	AATTCCAGTTGAGCTATTTCAATTCCTGAAAGATGATGCTGTGAAAGTGCTCCACTCAATATGCCAGCAAATTTGGAAAACTGAGCAGTGGCCACAGGACTGGAAAAGGTCAGTTTTCATTCCAATCCCAAAGAAAGGC	A	intergenic	gene-CACNA1E(dist=20580),gene-ZNF648(dist=199262)
16	67037615	67037615	T	TGTATTGTGCCGGGGACCAGCCCCGGCTGATCCAGGGTATTCGAAGGAGAGACGGCGTAGGCGAAGATCAGGAAACAATTGCTTAATTAAATGTTAATTAAGGATATAAAGAGTAATAGAATGAGGATAGCTCAGTAAAATTCAGTGAAGAAAAGAGGCTGAAATAAGGATAGCTCAGTGAGGAAATTCAGTGCAGAAAAGAGGCTGAATAATTCAGCCAGAAGGTAAGAGAAAGAACGACATGGTGAGACCAAGTTTCGGTGAACAAGGCCCACACTTTATTTTTCAAAGTAGTTTTTATACCTTAAGTTATGCACAGAGGATAATGGGGGAAGGGGTAGAGTCTTGCAGCAAACCAGGCTTTCTTCCTGCAAACTTATCATATGCAAAAGCTTAGGT…	intronic	gene-HMCN1
16	68540092	68540169	GGCACATTGCCGGGAGCCGGCATATTGCATATTGAGTGCATATTGCATATTGAGTGCAGCACTTTTCAGGTCCCCGCA	G	intronic	gene-KCNK2
16	68810801	68810801	T	TAACATGTGTTGGGGGCCAGAGTGAGGTACTCCGCCCGTGACAAAGGTCATGAGGAAGGAGGCTCGACATACGCAAAGGCGGGATCGAGCCTCAGGAGTCCCCCTGGAACTCCTCGAGCATCTACCCCCATAACCAGAGCCTGCCTACTTTACTACTTTGTGCTCACCTACACCTCTGACTTTACGGGGGGCTGTCCCCCACCACCTCTTTTGGAGAAGGAGTTAACTTAGAGCTCCAGTTTATAATAATTCCTGGGCGTGATAAGAGTGTTTTAACCTACAAACTCCTCTGAAGGTTCTCTAGCCTGCCTGACAGGCTCGTCCGGCCACATGTGATTGCTCACAGCCTCCCAACCGTGAGAGGCACAAGATGCTTTAAACCCTCTAAAAACGGGTTCT…	intergenic	gene-KCNK2(dist=215120),gene-CENPF(dist=118492)
17	2151082	2152371	CTGCCGGGGTCCAGCCCCGGCTGATCCAGGGTATTCGAAGCGGGGACGGCGTCGGCGAGGGTCAGGATACGATAGCTTCAATTAGATATTAATTAAAGATATAAACAGTAATAGGATGAGGATAGCTCAGTAGGAAAATTCAGTGGAGAAAAGAGGCTGAGTGGCTTGGTTTACGCGGGAGACCAATAAAACTTCAAGACAAGAAGTTTGCACCACTTACGTAGGCCACAGGCGTCCTTCCGTTCTCCCGAAGGAGAGGAGACACTGAGGCCTCCCCGGTCGGATCTTAGAAGCCCAGGCATAATTAGTAAGCATGGTGGGTTCCGCACTCCAGATGGAGACTCAGCCAGAGAGAGAGAGAGAGCGACATGGGGAGACCAGTATTTCGAGAAACTGATC…	C	intergenic	gene-NPY2R(dist=57997),gene-RBM46(dist=388317)
17	15699335	15699335	C	CTGGTCCCTGTTCGGGCGCCACCTGCCGGGGACCAGCCCCGGCTGAACCAGGGTATTCGAAGGAGAGACGGCGTAGGCGAAGATCAGGAAACAACTGCTTAATTAAACGTTAATTAAGGATATAAAGAGTAATAGAATGAGGATAGCTCAGTGAGGAAATTCAGTGGAGAAAAGAGGCTGAGTAATTCAGCCAGAAGGTAAGAGAAAGAACGACATGGTGAGACCAAGTTTCGGTGAACAAGGCCCGCACTTTATTTTTCAAAGTAGTTTTTATACCTTAAGTTATGCACAGAGGATAATGGGGGAAGGGGTAGAGTCTTGCAGCAAACCAGGCTTTCTTCCTGCAAACTTATCATATGCAAAAGCTTAGGTGATTTGCATCATCTTCTGGCCCGGAGG…	intronic	gene-INPP4B
17	23465958	23467185	GGCCTTGTGCCGGGAGCCGGCATATTGCATATTGAGTGCATATTGCATATTGAGTGCAGCACTTTTCAGGATCTGGAATAGCTCAACTGGAATTCTATCACTGCCGGTAGCCAGCGTGAGGAACTCCACCCATGACAAAGGTCATGAGGAAGGAGGCTTGGCATACGCAAAGGCGGGATCAAGCCTCAGGAGTCTCTCTGGAAATTCTCGAGCAATCTACCCCCAAAACCAGAGTCTGCCTACTTTCTGCTTTGTGCTTTCACCTACACCTCTGACTTTACGGGGGGCTGTCCCCCACTACCTCTCTGAAAAAAGTTAGCTTACAGCTCCAGTTAATAATTCCTGGGTGTGACAGTGTTTAACCTACAAACTCCTTTGGAAATCCTCTAGCCTGCCTGA…	G	intergenic	NONE(dist=NONE),gene-PABPC4L(dist=623763)
17	24308640	24309739	TAAGCATTGCCGGGGACCAGCCCCGGCTGATCCAGGGAATTCGAAGCGGGGACGGCGTCAGCGAAGATCAGGAAACAATTGCTTAATTAAACGTTAATTAAGGATATAAAGAGTAATAGAATGAGGATAGCTCAGTAGGAAAATTCAGTGGAGAAGAGAGGCTGAAATAAGGATAGCCCAGTGAGGAAATTCAGTGTAGAAAAGAGGCTGAATAATTCAGCCAGAAGGTAAGAGAAAGAACGACATGGTGAGACCAAGTTTCGGTGAACAAGGCCCACACTTTATTTTCCAAAGTAGTTTTTATACCTTAAGTTATGCATAGAGGATAATGGGGGAAGGGGTAGAGTCATGCAGTAAGCCAGGCTTTCTTCCTGCAAACTTATCATATGCAAAAGTTTA…	T	intergenic	gene-PABPC4L(dist=212137),gene-TRNAC-GCA-191(dist=515692)
17	26473796	26474919	GGCTTGCTGCCGGGGACCAGCCCCGGCTGATCCAGGGTATTCGAAGGAGAGACGGCGTAGGCGAAGATCAGGAAACAATTGCTTAATTACATGTTAATTAAGGATATAAAGAGTAATAGAATGAGATAGCTCAGTGAAGAAATTCAGTGAAGAAAAGAGGCTGAAATAAGGATAGCTCAGTGAGGAAATTCAGTGGAGAAAAGAGGCTAAATAATTCAGCCAGAAGGTAAGAGAAAGAACGACATGGTGAGACCAAGTTTCGGTGAACAAGGCCCGCACTTTATTTTCCAAAGTAGTTTTTATACCTTAAGTTATGCATAGAGGATAATGGGGGAAGGGGTAGAGTCTTGCAGCAAACCAGGCTTTCTTCCTGCAAACTTATCATATGCAAAAGCTTAG…	G	intergenic	gene-PCDH10(dist=1402572),NONE(dist=NONE)
17	27938946	27938946	G	GCTGGCATATTGAGTGCAGCACTTTCACAGCATCATCTTTCAGGATTTGGAATAGATCAA	intergenic	NONE(dist=NONE),gene-C17H4orf33(dist=745522)
17	28268095	28269368	TGGCAAATGTTGGGGGCCAGAGTGAGGTACTCCGCCCGTGACAAAGGTCATGAGGAAGGAGGCTCGACATACGCAAAGGCGGGATCGAGCCTCAGGAGTCCCCCTGGAACTCCTCGAGCATCTGCCCCCATAACCAGAGCCTGCCTACTTTACTACTTTGTGCTCTCACCTACACCTCTGACTTTACGGGGGGCTGTCCCCCACCACCTCTTTTGGAGAAGGAGTTAACTTAGAGCTCCAGTTTATAATAATTCCTGGGCGTGATAAGTGTTTTAACCTACAAACTCCTCTGAAGGTTCTCTAGCCTGCCTGACAGGCTCGTCCGGCCACATGTGATTGCTCACAGCCTCCCAACCGTGAGAGGCACAAGATGCTTTAAACCCTCTAAAAACAGGTTCT…	T	intergenic	NONE(dist=NONE),gene-C17H4orf33(dist=415100)
17	28385266	28386545	CACACTGTGCCGGGGTCCTGCCCCGGCTGATCCAGGGTATTCGAAGCGGGGACGGCGTCGGCGACCTATTTATTTAAATATTTTATCAAAGATATAAAGAGTAATAGGATGAAGATAGCTCAGTAGGAAAATTCAGTGGAGAAAAGAGGCTGAGTAGCTTGGTTTACGCGGGAGACCAATAAAACTTCAAGACAAGAAGTTTGCACCACTTACGTAGGCCGCAGGCGTCCTTCCGTTCTCCCGAAGGAGAGGAGACACTGAGGCCTCCCCAGTCGGATCTTAGAAGCCCAGGCATAATTAGTAAGCATGGTGGGTTCCGCGCTCCAGATGGAGACTCAGCCAGAGTGAGAGAGAGAGCGACATGGGGAGACCAGTATTTCGAGAAACTGATCCCAATTC…	C	intergenic	NONE(dist=NONE),gene-C17H4orf33(dist=297923)
17	30144838	30144838	A	ACACCTACCTGCCGGGAGCCGGTGAGGCATTCCACTCGTGACAAAGATCATGAGGAAGGAGGCTCGGCATACGCAAAGGCGGGATCGAGCCTCAGGAGTCCACCCGGATATTCTCGAGCATCTACCCCCCAAAAAACCAGAGTCTGCCTACTTTATCGCTTTGTGCTCTCACCTCTGACTTTACTGGGGGCTGTCCCCTACCACCATCTCGCTCTCTCTGTCAAAGAGTTAACTTACAGCTCCAATTAATAAAGTTCCTGGGCAATTAGGAGTGTTTAAATCCAAACCCCTGAGATGGCTCTCTAACTCGCCTGACAAGTTTACCTGGACTCCTACAGCTATGCATAGGATTGTCTACAGTCTTCCAGCCTCGAGAGGCATGGGAAGCTTAAGATATTC…	intergenic	gene-INTU(dist=141859),NONE(dist=NONE)
17	33387510	33387510	G	GGTAAGTTGCCGGGAGCCAGCATATTGCATATTGAGTGCATAGTGCATATTGCATATTGAGTGCAGCACTTTCCACAGCATCATCTTTCAGGATCTGGAATAGCTCAACTGGAATTCTATCACTGCTGGGAGCCAGTGAGGAACTCCGCCCATGGCAAAGGTCATGAGGAAGGAGGCTTGACATACGCAAAGGCGGGATCGAGCTTCAGGAGTCCCCCTGGAAATTCTCGAGCATATACCCCCAAAACCAGAGTCTGCCTACTTTCTGCTTTGTGTTTTCACCTACACCTCTGACTTTACGTGGGGCTGTCCCCCACTACCTCTCTCTGAAAAAAGAGTTAGCTTACAGCTCCAGTTAATAATTCTTGGGTGTGACAGTGTTTCAAACTACAAACTCCT…	intergenic	gene-ANKRD50(dist=216856),gene-SPRY1(dist=964077)
17	37472244	37473541	GAGAAAAGTGCGGGGAGCCGGTGAGGCATTCCACTCGTGACAAAGGTCATGAGGAAGGAGGCTCGGCATACGCAAAGGCGGGATCGAGCCTCAGGAGTCCCCCCGGATATTCTCGAGCATTTTCCCCCAAAAAACCAGAGTCTGCCTACTTTATTGCTTTGTGCTCTCACCTCTGACTTTACTGGGGGCTGTCCCCTACCACCATCTCGCTCTCTCTCTGTCAAAGAGTTAACTTACAACTTCAATTAATAAAGTTCCTGGGCAATTAGGAGTGTTTAAATCCAAACCCCTCTGATGGCTCTCTAACTCGCCTGACAAGTTTACCCGGACTCCTGCAGCTATGCATACGATTGTTTACAGTCTCCCAGCCTCGAGAGGCATGGGAAGCTTAAGATATTC…	G	intergenic	gene-FSTL5(dist=281183),NONE(dist=NONE)
17	56329025	56330330	CCCGGGGTGTGGGGAGCCGGTGAGGCATTCTGCTCATGACAAAGGTCATGAGGAAGGAGGCTCGGCATACGCAAAGGCGGGATCGAGCCTCAGGAGTCCCCCCGGATATTCTCGAGCATTTTCCCCCAAAAAACCAGAGTCTGCCTACTTTATTGCTTTGTGCTCTCACCTCTGACTTTACTAGGGGCTGTCCCCTACCACCATCTCGCTCTCTCTCTGTCAAAGAGTTAACTTACAGCTCCAATTAATAAAGTTCCTGGGCAATTAGGAGTGTTTAAATCCAAACCCCTCAGATGGCTCTCTAACTCGCCTGACAAGTTTACCCGGACTCCTGCAGCTATGCATACGATTGTTTACAGTCTCCTAGCCTCCAGAGGCACGGGAAGCTTAAGATATTCA…	C	intronic	gene-SRRM4
17	58337894	58337894	C	CCCTGGCTGCTGGGGACCTGCCCCAGCTGATCCAGGGTATTCGAAGGAGAGACGGCCTAGGCGACTATTTACATGCTAATTAGAGATATAGAGAACAATAGAATGAGGATAGCTCAGTAGGAAAATTCAGTGGAGAAAAGAAGCTGAGTAGCTTGGTTTACGCGGGAGACCAATAAAACTTCAAGACAAGAAGTTTGCACCACTGACGTAGGCCGCAGGCGCCCTCTCGAATAGCGGAAGGTGTCTCACCCTAGACACCTTCTCGAGTGGGTCTTAGAAGCCCAGGCATGATTAGTCAGCGTGGTGGGTTCCGCGCTCCAGATGGAGACTCAGCTGGAAGTTAAAAGAAAGAATGACATGGGGAGACCAAGCGTTGGTGAGCAAGGCCCGTAGCTTTAT…	intergenic	gene-C17H12orf49(dist=70977),gene-MED13L(dist=273156)
17	59236490	59237794	CCCTTATTGCCGGGGACCAGCCCCGGCTGATCCAGGGTATTCGAAGGAGAGACGGCGTCGGCGAGGGTCAGGATACGATAGCTTCAATTAGGTATTAATTAAAGATATAAAGAGTAATAGAATAAGGATAGCTCAGTAGGAAAATTCAGTGGAGAAAAGAGGCTGAGTAGCTTGGTTTACGCGGGAGACCAATAAAACTTCAAGACAAGAAGTTTGCACCACTTACGTAGGCCGCAGGCGTCCTTCCGTTCTCCCGAAGGAGAGGAGACACTGAGGCCTCCCCGGTCGGATCTTAGAAGCCCAGGCATAATTAGTAAGCATGGTGGGTTCCGCGCTCCAGATGGAGACTCAACCAGAGTGAGAGAGAGAGCGACATGGGGAGACCAGTATTTCGAGAAA…	C	intergenic	gene-MED13L(dist=346117),gene-TRNAG-CCC-114(dist=358772)
17	63997684	63997688	GGCAT	GAGCATATTATTAAGTGTTGGGGGCCAGAGTGAGGTACTCCGCCCATGGCAAAGGTCATGAGGAAGGAGGCTCGACATACGCAAAGGCGGGATCGAGCCTCAGGAGTCCCCCTGGAACTCCTCGAGCATCTACCCCCATAACCAGAGCCTGCCTACTTTACTACTTTGTGCTCACCTACACCTCTGACTTTACGGGGGGCTGTCCCCCACCACCTCTTTCGGAGAAGGAGTTAACCTAGAGCTCCAGTCAATAAAAACTCTTGGGTGTGACAAGAGTGTTTTAACCTACAAACTCCTCTGAAGGTTCTCTAGCCTGCCTGACAGGCTCGTCCAGCCACATGTGATTGCTCACAGCCTCCTAACCGTGAGAGGCACGAGATGCTTTAAACCCTCTAAAAA…	intronic	gene-USP30
17	63997693	63998117	AATCACGTTAGACCTTAGGCTAAGTAAATTCTTTCCTTAACTAAAACCCACTACACCCTCACCCTGTAGGAATGTAACTTTATTTGGGTGGCGTCTGTTTTGAGACTAATCAGCCCTGGAGAAATAAGTGTCCTGATTGACTGACCGCTGTCACAAGGAGAGGGTCTTAAATTGTCAGCAGGCCCCCCTGGCCAGAAGATGATGTAACACCCCTAAGACCTCTGTATACATTTGTGTGAAGCACCTGACTTTAATAAAAGTCAGGACTGCTGTCCCCACGTGACTTTTGTATAACATCTCAGTGTATAAAAACAGACTCTGGAAAATAAAGAATTGGGATCAGTTTCTCGAAATACTGGTCTCCCCATGTCGCGCTCTCTCTCACTCTGGTTGAGTCTC…	AT	intronic	gene-USP30
17	63998117	63998117	C	CTTACTAATTATGCCTGGGCTTCTAAGATCCGACCGGGGAGGCCTCAGTGTCTCCTCTCCTTCGGGAGAACGGAAGGACGCCTGCGGCCTACGTAAGTGGTGCAAACTTCTTGTCTTGAAGTTTTATTGGTCTCCCGCGTAAACCAAGCTACTCAGCCTCTTTTCTCCACTGAATTTTCCTACTGAGCTATCCTTATTCTATTACTCTTTATATCTTTAATTAATACCTAATTGAAGCTGTCGTATCCTGACCCTCGCCGACGCCGTCTCTCCTTCGAATACCCTGGATCAGCCGGGGCTGGTCCCCGGCAAT	intronic	gene-USP30
17	64624073	64625380	CTCCCTGGAATTCCGTGTGCAGAAGCAGGCTCACTGTTGGGGGCCAGAGTGAGGTACTCCGCCCATGGCAAAGGTCATGAGGAAGGAGGCTCGACATACGCAAAGGCGGGATCGAGCCTCAGGAGTCCCCCTGGAAATCCTCGAGCGTCTACCCCATAACCAGAGCCTGCCTACTTTACTACTTTGTGCTCTTACCTACACCTCTGACTTTACGGGGGGCTGTCCCCCACCACCTCTTTCGGAGAAGGAGTTAACCTAGAGCTCCAGTCAATAAAAACTCTTGGGTGTGGCAAGAGTGTTTTAACCTACAAACTCCTCTGAAGGTTCTCTGGCCTGCCTGACAGGCTCGTCCGGCCACATGTGATTGCTCACAGCCTCCCAACCATGAGAGGCACGAGA…	C	intronic	gene-WSCD2
17	69496103	69496103	G	GGACAGTTGCGGGGAGCCGGTGAGGCATTCCACTCGTGACAAAGGTCATGAGGAAGGAGGCTCGGCATACGCAAAGGCGGGATCGAGCCTCAGGAGTCCCCCCGGATATTCTCGAGCATTTTCCCCCAAAAAAACCAGAGTCTGCCTACTTTATTGCTTTGTGCTCTCACCTCTGACTTTACTGGGGGCTGTCCCCTACCACCATCTCGCTCTCTCTCTGTCAAAGAGTTAACTTACAGCTCCAATTAATAAAGTTCCTGGGCAATTAGGAGTGTTTAAATCCAAACCCCTCAGATGGCTCTCTAACTCGCCTGACAAGTTTACCCGGACTCCTGCAGCTATGCATACGATTGTTTACAGTCTCCTAGCCTCCAGAGGCACGGGAAGCTTAAGATATTC…	intronic	gene-LOC101906447
17	71268495	71268495	G	GGGGCCTTGCCGGGGACCAGCCCCGGCTGATCCAGGGTATTCGAAGGAGAGACGGCGTAGGCGAAGATCAGGAAACAATTGCTTAATTAAACGTTAATTAAGGATATAAAGAGTAATAGAATGAGGATAGCTCAGTAAAATTCAGTGAAGAAAAGAGGCTGAAATAAGGATAGCTCAGTGAGGAAATTCAGTGGGGAAAAGAGGCTGAATAATTCAGCCAGAAGGTAAGAGAAAGAACGACATGGTGAGACCAAGTTTCGGTGAACAAGGCCCGCACTTTATTTTTCAAAGTAGTTTTTATACCTTAAGTTATGCACAGAGGATAATGGGGGAAGGGGTAGAGTCTTGCAGCAAACCAGGCTTTCTTCCTGCAAACTTATCATATGCAAAAGCTTAGGT…	intergenic	gene-DERL3(dist=5613),gene-SLC2A11(dist=1926)
17	71490201	71491498	CTCCAACTGCTGGGGACCAGCCCCAGCTGATCCAGGGTATTCGAAGGAGAGACGGCCTAGGCGACTATTTATATGCTAATTAGAGATATAGAGAACAATAGAATGAGGATAGCTCAGTAGGAAAATTCAGTGGAGAAAAGAAGCTGAGTAGCTTGGTTTACGCGGGAGACCAATAAAACTTCAAGACAAGAAGTTTGCACCACTGACGTAGGTCGCAGGCGCCCTCTCGAATAGCGGAAGGTGTCTCACCCTAGACACCTTCTCGAGTGGGTCTTAGAAGCCCAGGCATGATTAGTCAGCGTGGTGGGTTCCGCGCTCCAGATGGAGACTCAGCTGGAAGTTAAAGGGAAGAATGACATGGGGAGACCAAGCGCTGGTAAACAAGGCCCGTAGCTTTAT…	C	intergenic	gene-GGT1(dist=12266),gene-SNRPD3(dist=4918)
18	551693	551696	ATCA	AGTTGAGCTATTGCAAATCCTGAAAGATGATGCTGTGAAAGTGCTGCACTCAATATGCCAGAAAATTTGGAAAACTCAGCAGTGGCCACAGGACTGGAGAAGGACAGTTTGCATTCCAATCCCAAAGAAAGG	intergenic	gene-LOC789753(dist=277798),gene-UQCRFS1(dist=445564)
18	811650	811650	G	GCCCCAGTGCCGAGGACCAGCCCCGGCTGATCCAGGGTATTCGAAGGAGAGACGGCATAGGCGAGGATCAGGATACAATAGCTTCAATTAGATATTAATTAAAGATATAAAGAGTAATAGAATAAGGATAGCTCAGTAGGAAAATTCAGTGGAGAAAAGAGGCTGAGCAGCTTGGTTTACGCGGGAGACCAATAAAACTTCAAGACAAGAAGTTTGCACCACTTAGGTAGGCCGCAGGCGTCCTTCCGTTCTCCCGAAGGGGAGGAGACACTGAGGCCTCCCCGGTCGGATCTTAGAAGCCCAGGCATAATTAGTAAGCATGGTGGGTTCCGCGCTCCAGATGGAGACTCAGCCAGAGTGAGAGAGAGAGCGACATGGGGAGACCAGTATTTCGAGAAA…	intergenic	gene-LOC789753(dist=537755),gene-UQCRFS1(dist=185610)
18	2483298	2484584	GGCTACCTGCCGGGGACCAGCCCCGGCTGATCCAGGGTATTCGAAGGAGAGACGGCATAGGCGAGGATCAGGATACGATAGCTTCAATTAGGTATTAATTAAAGATATAAAGAGTAATAGAATAAGGATAGCTCAGTAGGAAAATTCAGTGGAGAAAAGAGGCTGAGTAGCTTGGTTTACGCGGGAGACCAATAAAACTTCAAGACAAGAAGTTTGCACCACTTACGTAGGCCGCAGGCGTCCTTCCGTTCTCCCGAAGGAGAGGAGACACTGAGGCCTCCCCGGTCGGATCTTAGAAGCCCAGGCATAATTAGTAAGCATGGTGGGTTCCGCGCTCCAGATGGAGACTCAACCAGAGTGAGAGAGAGAGCGACATGGGGAGACCAGTATTTCGAGAAA…	G	intronic	gene-ZFP1
18	3349101	3349101	G	GAATCAACTGTTGGGGGCCAGAGTGAGGTACTCCGCCCATGGCAAAGGTCATGAGGAAGGAGGCTCGACATACGCAAAGGCAGGATCGAGCCTCAGGAGTCCCCCTGGAAATCCTCGAGCGTCTACCCCCATAACCAGAGCCTGCCTACTTTACTACTTTGTGCTCTTACCTACACCTCTGACTTTATGGGGGGCTGTCCCCCACGACCTCTTTCGGAGAAGGAGTTAACCTAGAGCTCCAGTTAATAATAATTCCTGGGCGTGATAAGAGTGTTTTAACCTACAAACTCCTCTGAAGGTTCTCTAGCCTGCCTGACAGGCTTGTCCGGCCACATGTGATTGCTCACAGCCTCCCAACCGTGAGAGGCACGAGATGCTTTAAACCTTCTAAAAACAGGT…	intergenic	gene-TERF2IP(dist=405182),gene-CNTNAP4(dist=71387)
18	26094137	26095443	TGTTGGGGGCCAGAGTGAGGTACTCCGCCCATGGCAAAGGTCATGAGGAAGGAGGCTCGACATACGCAAAGGCGGGATCGAGCCTCAGGAGTCCCCCTGGAACTCCTCGAGCATCTACCCCCATAACCAGAGCCTGCCTACTTTACTACTTTGTGCTCACCTACACCTCTGACTTTACGGGGGGCTGTCCCCCACCACCTCTTTCGGAGAAGGAGTTAACCTAGAGCTCCAGTCAATAAAAACTCTTGGGTGTGACAAGAGTGTTTTAACCTACAAACTCCTCTGAAGGTTCTCTAGCCTGCCTGACAGGCTCGTCCGGCCACATGTGATTGCTCACAGCCTCCCAACCGTGAGAGGCACAAGATGCTTTAAACCCTCTAAAAACGGGTTCTTTAGAGA…	TAAT	intronic	gene-CCDC113
18	27502655	27502655	T	TAAGCAATTGTGGGGAGCGAGCTCCGCCCCTGGCAAAGGTCATGAGGAAGGAGGCTTGGCATACGCAAAGGCGGGATCAAGACTCAGGAGTCTCCCTGGAAATTCTTGAGCAATCTACCCCCAAAACCAGAGTCTGCCTACTTTCTGCTTTGTGCTTTCACCTACACCTCTGACTTTACAGGGGGCTGTCCCCCACTACCTCTCTCTGAAAAAAGAGTTAGCTTACAGCTCCAGTTAATAATTCCTGGGTGTGACAGTGTTTCAACCTACAAACTCCTTTGGAAGTCCTCTAGCCTGTCTGAATAGGTTTTTCCGGCCACATGTGATTGCTCAGAGCCTCCCAACTGTGAGAGACATGAGATGTTCTAAACTGTCTAAATACAGATTCCTTTGAGCAGT…	intergenic	gene-TRNAW-CCA-37(dist=558323),gene-TRNAA-AGC-7(dist=1746534)
18	27782648	27782648	A	ACATATCCTGCCGAGGACCAGCCCCGGCTGATCCAGGGTATTCGAAGGGGAGACGGCGTCGGCGACTATTTATATGCTAATTAGAGATATAGAGAACAATAGAATGAGGATAGCTCAGTAGGAAAATTCAGTGGAGAAAAGAAGCTGAGTGGCTTGGTTTACGCGGGAGACCAATAAAACTTCAAGACAAGAAGTTTGCACCACTTACGTAGGCCGCAGGCGCCCTCTCGAATAGCGGAAGGTGTCTCACCCTAGACACCTTCTCGAGTGGGTCTTAGAAGCCCAGGCATGATTAGTAAGCGTGGTGGGTTCCGCGCTCCAGATGGAGACTCAGCTGGAAGTTAAAGGGAAGAATGACATGGGGAGACCAAGCGTTGGTGAGCAAGGCCCATAGCTTTA…	intergenic	gene-TRNAW-CCA-37(dist=838316),gene-TRNAA-AGC-7(dist=1466541)
18	28031419	28032631	TAGTTAACTGCTGGGGACCAGCCCCGGCTGATCCAGGGTATTCGAAGGAGAGACGGGGTAGACGAAGATCAGGAAACAATTGCTTAATTAAACGTTAATTAAGGATATAAAGAGTAATAGAATGAGGATAGCTCAGTAAAATTCAGTGAAGAAAAGAGGCTGAAATAAGGATAGCTCAGTGAGGAAATTCAGTGGAGAAAAGAGGCTGAAATAAGGATAGCTCAGTGAGGAAATTCAGTGGAGAAAAGAGGCTGAAATAAGGATAGCTCAGTGAGGAAATTCAGTGGAGAAAAGAGGCTGGATAATTCAGCCAGAAGGTAAGAGAAAGAACGACATGGTGAGACCAAGTTTCGATGAACAAGGCCCGTACTTTATTTTCCAAAGTAGTTTTTATACCTT…	T	intergenic	gene-TRNAW-CCA-37(dist=1087087),gene-TRNAA-AGC-7(dist=1216558)
18	29535139	29536434	TGTCATGTATCTGCTGTTGGGGGCCAGAGTGAGGTACTCCACCCATGGCAAAGGTCATGAGGAAGGAGGCTCGACATACGCAAAGGCGGGATCGAGCCTCAGGAGTCCCCCTGGAAATCCTCGAGCGTCTACCCCCATAACCAGAGCCTGCCTACTTTACTACTTTGTGCTCTTACCTACACCTCTGACTTTACGGGGGGCTGTCCCCCACCACCTCTTTCGGAGAAGGAGTTAACCTAGAGCTCCAGTCAATAAAAACTCTTGGGTGTGACAAGAGTGTTTTAACCTACAAACTCCTCTGAAGGTTCTCTAGCCTGCCTGACAGGCTCATCGGGCCACATGTGATTGCTCACAGCCTCCCAACCGTGAGAGGCACAAGATGCTTTAAACCCTCTAAAA…	T	intronic	gene-CDH8
18	31351762	31353057	GGACAGTTGTTGGGGGCCAGAGTGAGGTACTCCGCCCGTGACAAAGGTCATGAGGAAGGAGGCTCGACATATGCAAAGGCGGGATCGAGCCTCAGGAGTCCCCCTGGAACTCCTCGAGCATCTACCCCCATAACCAGAGCCTGCCTACTTTACTACTTTGTGCTCTTACCTACACCTCTGACTTTACGGGGGGCTGTCCCCCACCACCTCTTTCGGAGAAGGAGTTAACCTAGAGCTCCAGTCAATAAAAACTCTTGGGTGTGACAAGAGTGTTTTAACCTACAAACTCCTCTGAAGGTTCTCTAGCCTGCCTGACAGGCTCGTCCGGCCACATGTGATTGCTCACAGCCTCCCAACCGTGAGAGGCACGAGATGCTTTAAACCTTCTAAAAACAGGTT…	G	intergenic	gene-TRNAC-ACA-82(dist=520197),gene-CDH11(dist=1329827)
18	39820086	39821375	GTTCGGGCGCCACCTGCCGGGGTCCTGCCCCGGCTGATCCAGGGTATTCAAAGGAGAGACGGCATAGGCGAGGATCGGGATACAATCGCTTCAATTAGATATTAATTAAAGATATAAAGAGTAATAGAATAAGGATAGCTCAGTAGGAAAATTCAGTGGAGAAAAGAGGCTGAGTAGCTTGGTTTACGCGGGAGACCAATAAAACTTCAAGACAAGAAGCTTGCACCACTTACGTAGGCCGCAGGCGTCCTTCCGTTCTCCTGAAGGAGAGGAGACACTGAGGCCTCCCCGGTCGGATCTTAGAAGCCCAGGCATAATTAGTAAGCATGGTGGGTTCCGCGCTCCAGATGGAGACTCAGCCAGAGTGAGAGAGAGAGCGACATGGGGAGACCAGTATTT…	GA	intronic	gene-LOC112442305
18	39820578	39820752	TTATCAAAGTCAGGTGCTTCATACAAATGTATACAGAGGTCTTAGGGGTGTTACATCATCTTCTGGCCAGGGGGGCCTGCTGACAATTTACGACCCTCTCCTTGTGACAGCGGTCAGTCAATCAGGACACTTATTTCTCCAGGGCTGATTATTCTCAAAACAGATGCCACCCAAA	TC	intronic	gene-LOC112442305
18	43395289	43395290	TT	TCGTTTATTGCCGAGGACCAGCCCCGGCTGATCCAGGGTATTCGAAGGGGAGACGGCGTCGGCGACTATTTATATGCTAATTAGGGATATAGAGAACAATAGAATGAGGATAGCTCAGTAGGAAATTTCAGTGGAGAAAAGAAGCTGAGTAGCTTGGTTTACGCGGGAGACCAATAAAACTTCAAGACAAGAAGTTTGCACCACTTACGTAGGCCGCAGGCGCCCTCTCGAATAGCGGAAGGTGTCTCACCCTAGACACCTTCTCGAGTGGGTCTTAGAAGCCCAGGCATGATTAGTAAGCGTGGTGGGTTCCGCGCTCCAGATGGAGACTCAGCTGGAAGTTAAAAGAATGACATGGGGAGACCAAGCGTTGGTGAGCAAGGCCCGTAGCTTTATTTT…	intronic	gene-CEP89
18	45191500	45192800	CTGCCGGGGTCCAGCCCGGGCTGATCCAGGGTATTCGAAGCAGGGACAGTGTCAGCGAGGGTCAGTATACAATAGCTTCAATTAGATATTAATTAAAGATATAAAGAGTAATAGAATAAGGATAGCTCAGTAGGAAAATTCAGTGGAGAAAAGAGGCTGAGTAGCTTGGTTTATGCGGGAGACCAATAAAACTTCAAGACAAGAAGTTTGCACCACTTACGTAGGCCGCAGGCGTCCTTCCATTCTCCCGAAGGAGAGGAGACACTGAGGCCTCCCCAGTCGGATCTTAGAAGCCCAGGCATAATTAGTAAGCATGGCGGGTTCCGCGCTCCAGATGGAGACTGAACCAGAGTGAGAGGGAGAGCGACATGGGGAGACCAGTATTTCGAGAAACTGATC…	C	intergenic	gene-LOC785756(dist=57735),gene-LOC104970193(dist=40288)
18	49521431	49522729	CATATGTTGCGGGGAGCCGGTGAGGCATTCTGCTCATGACAAAGGTCATGAGGAAGGAGGCTCAGCATACGCAAAGGCGGGATCGAGCCTCAGGAGTCCGCCCGGAACTTCTCGAGCATTTTCCCCCAAAAAACCAGAGTCTGCCTACTTTATTGCTTTGTGCTCTCACCTCTGACTTTACTGGGGGCTGTCCCCTACCACCATCTCTCTCTCTCTCTGTCAAAGAGTTAACTTACAGCTCCAATTAATAAAGTTCCTGGGCAATTAGGAGTGTTTAAATCCAAACCCCTCAGATGGCTCTCTAACTCGCCTGACAAGTGTACCCGGACTCCTGCAGCTATGCATACGATTGTTTACAGTCTCCTAGCCTCCAGAGGCACGGGAAGCTTAAGATATTCA…	C	intergenic	gene-LOC100140085(dist=4925),gene-MAP3K10(dist=73852)
18	49521440	49521514	CGGGGAGCCGGTGAGGCATTCTGCTCATGACAAAGGTCATGAGGAAGGAGGCTCAGCATACGCAAAGGCGGGATC	CCAAAT	intergenic	gene-LOC100140085(dist=4934),gene-MAP3K10(dist=75067)
18	49521572	49521693	TGCCTACTTTATTGCTTTGTGCTCTCACCTCTGACTTTACTGGGGGCTGTCCCCTACCACCATCTCTCTCTCTCTCTGTCAAAGAGTTAACTTACAGCTCCAATTAATAAAGTTCCTGGGCA	TATT	intergenic	gene-LOC100140085(dist=5066),gene-MAP3K10(dist=74888)
18	49521715	49521853	ACCCCTCAGATGGCTCTCTAACTCGCCTGACAAGTGTACCCGGACTCCTGCAGCTATGCATACGATTGTTTACAGTCTCCTAGCCTCCAGAGGCACGGGAAGCTTAAGATATTCAAATAGCTTAGAGCCTCTCAGAGAG	ATT	intergenic	gene-LOC100140085(dist=5209),gene-MAP3K10(dist=74728)
18	49522539	49522928	GGTGCAAACTTCTTGTCTTGAAGTTTTATTGGTCTCCCGTGTAAACCAAGCTACTCAGCTTCTTTTCTCCACTGAATTTTCCTGAGCTATCCTCATTCTATTGTTCTCTATATCTCTAATTAGCATATAAATAGTCGCCTAGGCCGTCTCTCCTTCGAATACCCTGGATCAGCTGGGGCTGGTCCCCAGCAATATGTGAGGCAGTATTATAGTTTTATTTTTCTTTGATAAGGTTTTAGATTTGTAATTAACTGTTCTTTAAAAACTATAAACAATCTATAAAATATGAATTTTTATATATTTAATACATATTTGATATCCTTGCCATAAATTCAGTTAGATCTAGAAGGTTTTGTTTTTTTTTTTAATAAATTCAGTTCAGTTCAGTTC	GA	intergenic	gene-LOC100140085(dist=6033),gene-MAP3K10(dist=73653)
18	51456312	51456312	G	GGACAAGTGCCGGGGACCAGCCCCGGCTGATCCAGGGTATTCGAAGGAGAGACGGCATAGGCGAGGATCAGGATACAATAGCTTCAATTAGATATTAATTAAAGATATAAAGAGTAATAGAATAAGGATAGCTCAGTAGGAAAATTCAGTGGAGAAAAGAGGCTGAGTAGCTTGGTTTACGCGGGAGACCAATAAAACTTCAAGACAAGAAGTTTGCACCACTTACGTAGGCCGCAGGCGTCCTTCCGTTCTCCCGAAGGAGAGGAGACACTGAGGCCTCCCCGGTCGGATCTTAGAAGCCCAGGCATAATTAGTAAGCATGGTGGGTTCCGCGCTCCAGATGGAGACTCAGCCAGAGTGAGAGAGAGAGCGACATGGGGAGACCAGTATTTCGAGAAA…	intronic	gene-LOC100336941
18	56277547	56277547	A	AAAAGGAGTGCCGGGGACCAGCCCCGGCTGAACCAGGGTATTCGAAGGAGAGACGGCGTAGGCGAAGATCAGGAAACAATTGCTTAATTAAATGTTAATTAAGGATATAAAGAGTAATAGAATGAGGATAGCTCAGTAAAATTCAGTGAAGAAAAGAGGCTGAAATAAGGATAGCTCAGTGAGGAAATTCAGTGGAGAAAAGAGGCTGAATAATTCAGCCAGAAGGTAAGAGAAAGAACGACATGGTGAGACCAAGTTTCGGTGAACAAGGCCCGCACTTTATTTTTCAAAGTAGTTTTTATACCTTAAGTTATGCACAGAGGATAATGGGGGAAGGGGTAGAGTCTTGCAGCAAACCAGGCTTTCTTCCTGCAAACTTATCATATGCAAAAGCTTAGG…	intergenic	gene-ATF5(dist=3868),gene-SIGLEC11(dist=5772)
18	58460612	58460612	T	TACATGACTGCCGGGGACCAGCCCCGGCTGATCCAGGGTATTCGAAGGAGAGACGGCATAGGCGAGGATCAGGATACAATAGCTTCAATTAGATATTAATTAAAGATATAAAGAGTAATAGGATAAGGATAGCTCAGTAGGAAAATTCAGTGGAGAAAAGAGGCTGAGTAGCTTGGTTTACGCGGGAGACCAATAAAACTTCAAGACAAGAAGTTTGCACCACTTACGTAGGCCGCAGGCGTCCTTCCGTTCTCCCGAAGGAGAGGAGACACTGAGGCCTCCCCGGTCGGATCTTAGAAGCCCAGGCATAATTAGTAAGCATGGTGGGTTCCGCGCTCCAGATGGAGACTCAGCCAGAGTGAGAGAGAGAGCGACATGGGGAGACCAGTATTTCGAGAA…	intergenic	gene-LOC100848895(dist=32074),gene-LOC506495(dist=40833)
18	58573200	58574427	AACAGACTTGCCGGGAGCCGGCATATTGCATATTGAGTGCATATTGCATATTGAGTGCAGCACTTTTCAGGATCTGGAATAGCTCAACTGGAATTCTATCACTGCCGGTAGCCAGCGTGAGGAACTCCACCCATGACAAAGGTCATGAGGAAGGAGGCTTGGCATACGCAAAGGCGGGATCAAGCCTCAGGAGTCTCCCTGGAAATTCTCGAGCAATCTACCCCCAAAACCAGAGTCTGCCTACTTTCTGCTTTGTGCTTTCACCTACACCTCTGACTTTACGGGGGGCTGTCCCCCACTACCTCTCTGAAAAAAGTTAGCTTACAGCTCCAGTTAATAATTCCTGGGTGTGACAGTGTTTAACCTACAAACTCCTTTGGAAATCCTCTAGCCTGCCTG…	A	intergenic	gene-LOC506495(dist=39514),gene-LOC101904435(dist=52273)
18	59909142	59919759	TCAGTGTTGCTGGGGACCAGCCCCAGCTGATCCAGGGTATTCGAAGGAGAGACGGCCTAGGCGACTATTTATATGCTAATTAGAGATATAGAGAACAACAGAATGAGGATAGCTCAGTAGGAAAATTCAGTGGAGAAAAGAAGCTGAGTAGCTTGGTTTACGCGGGAGACCAATAAAACTTCAAGACAAGAAGTTTGCACCACTGACGTAGGCCGCAGGCGCCCTCTCGAATAGCGGAAGGTGTCTCACCCTAGACACCTTCTCGAGTGGGTCTTAGAAGCCCAGGCATGATTAGTCAGCGTGGTGGGTTCCGCGCTCCAGATGGAGACTCAGCTGGAAGTTAAAGGGAAGAATGACATGGGGAGACCAAGCGCTGGTAAACAAGGCCCGTAGCTTTAT…	T	exonic	gene-LOC112442367
18	61311037	61318282	AGCTCAGGACGTTAGGGGCAAACAGGATTTAGGAAGATAAGTAGTAAACTGAGGAATGTAGCATGAGTTACGATGTAATCACAAGTTAACTATAGGACACATTAGAGGAGGTAGATAATAGATGATAAGGCTGATTCCGAGAGAATCACTGAAGCAGAAACTCTGTTTGAAGAGCAACAATGATTTATGGAGATAATAAATCTGGGAGAGGGGGAACTGAAAATGTCAAACCTCTGGCCTAATGCTTTTGTAAAAGTATGAAAGAGAATCTTAAACTTGGAATAAACAGGCAGTCCATAGAAAACTGAGAGGCTGTCTCATTGGCCGACACCGTCGTCTCTTCAGGTTGAATCCCTGGTTGCTGGAGTTGAACTCCGGCCAGTGGCGCCCAGAACAGGG…	A	intergenic	gene-LOC514552(dist=4808),gene-LOC525820(dist=3995)
18	61320478	61320479	AA	ACCTGCCGGGGACCAGCCCCGGCTGATCCAGGGTATTCGAAGTGGGGACGGCGTCGGCGAGGATCAGGAAACAACTGCTTAATTAAACTTTAATTAAGGATATAAAGAGTAATAGAATGAGGATAGCTCAGTGAGGAAATTCAGTGGAGAAAAGAGGCTGAAATAAGGATAGCTCAGTGAGGAAATT	intergenic	gene-LOC514552(dist=14249),gene-LOC525820(dist=1798)
18	61320478	61321351	AACAGTGGAGAAAAGAGGCTGAACAATTCAGCCAGAAGGTAAGAGAAAGAACGACATGGTGAGACCAAGTTTCGGTGAACTAGGCCCGCACTTTATTTTCCAAAGTAGTTTTTATACCTTAAATTATGCATAGAGGATAATAGGGGAAGGGGTAGAGTCATGCAGTAAGCCAGGTTTTCTTCCTGCAAACTTATCATATGCAAAAGTTTAGGTGATTTGCATCATCTTCTGGCCCGGAGGCCTTTTTCTCTAAAGGTGATTATTCTAAAGTCAGGCGCCAGCCTCCAAAAAGCATTAGATAAAGTTGCATTCCTACAGAGCAAAGGTGTGGTGGGCTACAAGAAGAAAAAGAATTAACTCAAGGGTCCCAGGTTACAAACATTAAAGCTACTACTTACA…	A	upstream	gene-LOC525820
18	61430749	61431873	CTCCTGGTGCCGGAGACCAGCCCCGGCTGATCCAGGGTATTCGAAGGAGAGACAGCGTAGGCGAAGATCAGGAAACAATTGCTTAATTAAATGTTAATTAAGGATATAAAGAGTAATAGAATGAGGATAGCTCAGTAGGAAAATTCAGTGAAGAAAAGAGGCTGAAATAAGGATAGCTCAGTGAGGAAATTCAGTGGAGAAAAGAGGCTGAATAATTCAGCCAGAAGGTAAGAGAAAGAACGACATGGTGAGACCAAGTTTCGGTGAACAAGGCCCGCACTTTATTTTTCAAAGTAGTTTTTATACCTTAAGTTATGCACAGAGGATAATGGGGGAAGGGGTAGAGTCTTGCAGCAAACCAGGCTTTCTTCCTGCAAACTTATCATATGCAAAAGCTTA…	C	intergenic	gene-LOC112442239(dist=12274),gene-LOC100300449(dist=9791)
18	65041704	65043000	GGAGAATTGTTGGGGGCCAGAGTGAGGTACTCCACCCGTGACAAAGGTCATGAGGAAGGAGGCTCGACATACGCAAAGGCGGGATCGAGCCTCAGGAGTCCCCCTGGAAATCCTCGAGCATCTACCCCCATAACCAGAGCCTGCCTACTTTACTACTTTGTGCTCACCTACACCTCTGACTTTACGGGGGGCTGTCCCCCACCACCTCTTTTGGAGAAGGAGTTAACTTAGAGCTCCAGTTAATAATAATTCCTGGGCGTGATAAGAGTGTTTTAACCTACAAACTCCTCTGAAGGTTCTCTAGCCTGCCTGACAGGCTCGTCCGGCCACATGTGATTGCTCACAGCCTCCCAACCGTGAGAGGCACAAGATGCTTTAAACCCTCTAAAAACAGGTTCT…	G	intergenic	gene-LOC509810(dist=3703),gene-LOC789996(dist=2568)
19	1700025	1701322	TACTTTTTTGCCGAGGTCCAGCCCCGGCTGATCCAGGGTATTCGAAGGGGAGACGGCATCGGCGACTATTTATATGCTAATTAGAGATATAGAGAACAATAGAATGAGGATAGCTCAGTAGGAGAATTCAGTGGAGAAAAGAAGCTGAGTAGCTTGGTTTACGCGGGAGACCAATAAAACTTCAAGACAAGAAGTTTGCACCACTTACGTAGGCCGCAGGCGCCCTCTCGAATAGCGGAAGGTGTCTCACCCTAGACACCTTCTCGAGTGGGTCTTAGAAGCCCAGGCATGATTAGTAAGCGTGGTGGGTTCCGCGCTCCAGATGGAGACTCAGCTGGAAGTTAAAAGAAAGAATGACATGGGGAGACCAAGCGTTGGTGAGCAAGGCCCGTAGCTTTA…	T	intergenic	gene-CA10(dist=281566),NONE(dist=NONE)
19	4009240	4010526	TCAGAATTGCCGGGGACCAGCCCCGGCTGATCCAGGGTATTCGAAGGAGAGACGGCGTCGGCGAGGGTCAGGATACGATAGCTTCAATTAGATATTAATTAAAGATATAAAGAGTAATAGAATAAGGATAGCTCAGTAGGAAAATTCAGTGGAGAAAAGAGGCTGAGTAGCTTGGTTTACGCGGGAGACCAATAAAACTTCAAGACAAGAAGTTTGCACCACTTACGTAGGCCGCAGGCGTCCTTCCGTTCTCCCGAAGGAGAGGAGACACTGAGGCCTCCCCGGTCGGATCTTAGAAGCCCAGGCATAATTAGTAAGCATGGTGGGTTCCGCGCTCCAGATGGAGACTCAGCCAGAGTGAGAGAGAGAGCGACATGGGGAGACCAGTATTTCGAGAAA…	T	intergenic	gene-KIF2B(dist=229080),gene-LOC100847997(dist=808575)
19	5375464	5375464	T	TAGGAGAGTGCCGGAGGCCAGCCCCGGCTGATCCAGGGTATTCGAAGGAGAGACGGCGTAGGCGAAGATCAGGAGACAATTGCTTAATTAAATGTTAATTAAGGATATAAAGAGTAATAGAATGAGGATAGCTCAGTGAAGAAATTCAGTGGAGAAAAGAGGCTGAAATAAGGATAGCTCAGTGAGGAAATTCAGTGGAGAAAAGAGGCTGAATAATTCAGCCAGAAGGTAAGAGAAAGAACGACATGGTGAGACCAAGTTTTGGTGAACAAGGCCCGCACTTTATTTTCCAAAGCAGTTTTTATACCTTAAGTTATGCATAGAGGATAATGGGGGAAGGGGTAGAGTCATGCAGCAAACCAGGCTTTCTTCCTGCAAACTTATCATATGCAAAAGCTT…	intergenic	gene-STXBP4(dist=53756),gene-HLF(dist=116044)
19	46659200	46660337	TATATATATATATATATATATATGCCGGGGACCAGCCCCGGCTGATCCAGGGTATTCGAAGGAGAGACGGCGTAGGCGAAGATCAGGAAACAATTGCTTAATTAAATGTTAATTAAGTATATAAAGAGTAATAGAATGAGGATAGCTCAGTAAAATTCAGTGAAGAAAAGAGGCTGAAATAAGGATAGCTCAGTGAGGAAATTCAGTGGAGAAAAGAGGCTGAATAATTCAGCCAGAAGGTAAGAGAAAGAACGACATGGTGAGACCAAGTTTCGGTGAACAAGGCCCGTACTTTATTTTCCAAAGTAGTTTTTATACCTTAAGTTATGCATAGAGGATAATGGGGGAAGGGGTAGAGTCTTGCAGCAAACCAGGCTTTCTTCCTGCAAACTTATCATA…	T	intergenic	gene-LOC112442751(dist=4459),gene-LOC112442576(dist=16015)
19	50228459	50229749	GACATAGGTGCCGGGGTCTCCTGCCCGGCTGATCCAGGTACTTCGAAGTTGGGGACGGCGTCGGCCGACCTATTTATTTAAATATTTTATTCAAAGATATACAGAGTAATAGGCTGAGGATAGCCAGTAGGAGAAAGTTCAGTGGAGAAAAGAGGCTGAGGTTAGCTTGGTTTACGCCGGAGCCAATAAACTTCAAGAACAAGAATTGTGTACCAATTTACGTAGGCCGCAGGCATCCTTCTGTTCTCCCGAAGGAGAGGAGACACTGAGGCCTCCCCAGTCGGATCTTAGAAGCCCAGGCATAATTAGTAAGCATGGCGGGTTCCGCGCTCCAGATGGAGACTGGAGTGAGAGAGAGCGACATGGGGAGACCAGTATTTCGAGAAACTGATCCCAATT…	G	intergenic	gene-MIR2345(dist=16524),gene-LOC112442691(dist=2851)
19	50453608	50454793	GCAATGATGCTGGGAGCCGGCATATTGCATATTGCGTGCATATTGCATATTGAGTGCAGCACTTTTCAGGATCTGGAATAGCTCAACTGGAATTCTATCACTGCCGGTAGCCAGCGTGAGGAACTCCGCCCATGACAAAGGTCATGAGGAAGGAGGCTCGGCATACGCAAAGGCGGGATCGAGCTTCAGGAGTCCCCCTGGAAATTCTCGAGCATATACCCCCAAAACCAGAGTCTGCCTACTTTCTGCTTTGTGCTTTCACCTACACCTCTGACTTTACGGGGGGGGGCTGTCCCCCACTACCTCTCTGAAAAAAGAGTTAGCTTACAGCTCCAGTTAATAATTCCTGGGTGTGACAGTGTTTAACCTACAAACTCCTTTGGAAATCCTCTAGCCTGC…	G	intergenic	gene-LOC101903434(dist=9660),gene-LOC781977(dist=73600)
19	51935112	51936405	CAACTCCTGCCGGGGACCAGCCCCAGCTGATCCAGGGTATTCGAAGGAGAGACGGCATAGGCGAGGATCAGGATACAATAGCTTCAATTAGATATTAATTAAAGATATAAAGAGTAATAGAATAAGGATAGCTCAGTAGGAAAATTCAGTGGAGAAAAGAGGCTGAGTAGCTTGGTTTACGCGGGAGACCAATAAAACTTCAAGACAAGAAGTTTGCACCACTTACGTAGGCCGCAGGCGTCCTTCCGTTCTCCCGAAGGAGAGGAGACACTGAGGTCTCCCCGGTCGGATCTTAGAAGCCCAGGCATAATTAGTAAGCATGGTGGGTTCCGCGCTCCAGATGGAGACTCAACCAGAGTGAGAGAGAGAGCGACATGGGGAGACCAGTATTTCGAGAAA…	C	intronic	gene-RPTOR
19	57572634	57572634	T	TATAAAGTGTTGGGGGCCAGAGTGAGGTACTCCGCCCATGGCAAAGGTCATGAGGAAGGAGGCTCGACATACGCAAAGGCGGGATCGAGCCTCAGGAGTCCCCCTGGAACTCCTCGAGCATCTACCCCCATAACCAGAGCCTGCCTACTTTACTACTTTGTGCTTACCTACATCTCTGACTTTAGAGGGGGCTGTCCCCCACCACCTCTTTTGGAGAAGGAGTTAACCTAGAGCTCCAGTTAATAATAATTCCTGGGCGTGATAAGAGTGTTTTAACCTACAAACTCCTCTGAAGTTTCTCTAGCCTGCCTGACAGGCTCATCCGGCCACATGTGATTGCTCACAGCCTCCCAACCGTGAGAGGCACGAGATGCTTTAAACCCTCTAAAAACAGGTTCT…	intergenic	gene-RPL38(dist=376163),gene-LOC112442754(dist=82236)
20	13406093	13406093	C	CCTGTTCTGCCGGGGTCCAGCCCCGGCTGATCCAGTGTATTTGAAGCGGGGACGGTGTCGGCGAGGATCAGGATACAATAGTTTCAATTAGATATTAATTAAAGATGTAAAGAGTAATAGAATGAGGATAGCTCAGTAGGAAAATTCAGTGGAGAAAAGAGGCTGAGTAGCTTGGTTTACTCAGGAGACCAATAAAACTTCAAGACAAGAAGTTTGCACCACTTATGTAGGCCGCAGGCATCCTTCCGTTCTCCCGAAGGAGAGGAGACACTGAGGCCTCCCCGGTCGGATCTTAGAAGCCCAGGCATAATTAGTAAGCATGGTGGGTTCCGCGCTCCAGATGGAGACTCAGCCCAAGTGAGAGAGAGCGCGACATGGGGAGACCAGTATTTCGAGAAA…	intergenic	gene-MAST4(dist=345188),gene-SREK1(dist=32744)
20	15731889	15740275	TAGGTAGGTGCCGGGGACCAGCCCCGGCTGAACCAGGGTATTCGAAGGAGAGACGGCGTAGGCGAAGATCAGGAAACAATTGCTTAATTAAATGTTAATTAAGGATATAAAGAGTAATAGAATGAGGATAGCTCAGTAGGAAAATTCAGTGAAGAAAAGAGGCTGAAATAAGGATAGCTCAGTGAGGAAATTCAGTGGAGAAAAGAGGCTGAATAATTCAGCCAGAAGGTAAGAGAAAGAACGACATGGTGAGACCAAGTTTCGGTGAACAAGGCCCGCACTTTATTTTCCAAAGTAGTTTTTATACCTTAAGTTATGCATAGAGGATAATGGGGGAAGGGGTAGAGTCCTGCAGTAAGCCAGGCTTTCTTCCTGCAAACTTATCATATGCAAAAGTTT…	T	intergenic	gene-HTR1A(dist=141891),gene-IPO11(dist=1051593)
20	20332065	20333346	AGGAAGGAGTGTTGGGGGCCAGAGTGAGGTACTCCGCCCGTGACAAAGGTCATGAGGAAGGAGGCTCGACATACGCAAAGGCGGGATCGAGCCTCAGGAGTCCCCCTGGAACTCCTCGAGCATCTACCCCCATAACCAGAGCCTGCCTACTTTACTACTTTGTGCTCACCTACACCTCTGACTTTACGGGGGGCTGTCCCCCACCACCTCTTTTGGAGAAGGAGTTAACTTAGAGCTCCAGTTTATAATAATTCCTGGGCGTGATAAGAGTGTTTTAACCTACAAACTCCTCTGAAGGTTCTCTGGCCTGCCTGACAGGCTTGTCCGGCCACATGTGATCGCTCACAGCCTCCCAGCCGTGAGAGGCACAAGATGCTTTAAACCTTCTAAAAACAGGTT…	ATG	intergenic	gene-PDE4D(dist=14296),gene-RAB3C(dist=100283)
20	23991610	23991610	G	GAGCTGCTTGCCGGGGACCAGCCCCGGCTGAACCAGGGTATTCGAAGGAGAGACGGCGTAGGCGAAGATCAGGAAACAATTGCTTAATTAAATGTTAATTAAGGATATAAAGAGTAATAGAATGAGGATAGCTCAGTAGGAAAATTCAGTGAAGAAAAGAGGCTGAAATAAGGATAGCTCAGTGAGGAAATTCAGTGGAGAAAAGAGGCTGAATAATTCAGCCAGAAGGTAAGAGAAAGAACGACATGGTGAGACCAAGTTTCGGTGAACAAGGCCCGCACTTTATTTTCCAAAGTAGTTTTTATACCTTAAGTTATGCATAGAGGATAATGGGGGAAGGGGTAGAGTCATGCAGCAAGCCAGGCTTTCTTCCTGCAAACTTATCATATGCAAAAGTTT…	intronic	gene-CDC20B
20	23991610	23991610	G	GAGCTGCTTGCCGGGGACCAGCCCCGGCTGAACCAGGGTATTCGAAGGAGAGACGGCGTAGGCGAAGATCAGGAAACAATTGCTTAATTAAATGTTAATTAAGGATATAAAGAGTAATAGAATGAGGATAGCTCAGTAGGAAAATTCAGTGAAGAAAAGAGGCTGAAATAAGGATAGCTCAGTGAGGAAATTCAGTGGAGAAAAGAGGCTGAATAATTCAGCCAGAAGGTAAGAGAAAGAACGACATGGTGAGACCAAGTTTCGGTGAACAAGGCCCGCACTTTATTTTCCAAAGTAGTTTTTATACCTTAAGTTATGCATAGAGGATAATGGGGGAAGGGGTAGAGTCATGCAGCAAGCCAGGCTTTCTTCCTGCAAACTTATCATATGCAAAAGTTT…	intronic	gene-CDC20B
20	24178087	24178087	T	TTTTCATTGCCGGGGACCAGCCCCGGCTGATCCAGGGTATTCGAAGGAGAGACGGCGTAGGCGAAGATCAGGAAACAATTGCTTAATTAAATGTTAATTAAGGATATAAAGAGTAATAGAATGAGGATAGCTCAGTGAAGAAATTCAGTGGAGAAAAGAGGCTGAAATAAGGATAGCTCAGTGAAGAAATTCAGTGGAGAAAAGAGGCTGAATAATTCAGCCAGAAGGTAAGAGAAAGAACGACATGGTGAGACCAAGTTTCGGTGAACAAGGCCCGCACTTTATTTTTCAAAGTAGTTTTTATACCTTAAGTTATGCACAGAGGATAATGGGGGAAGGGGTAGAGTCTTGCAGCAAACCAGGCTTTCTTCCTGCAAACTTATCATATGCAAAAGCTTA…	intergenic	gene-ESM1(dist=61075),gene-LOC530348(dist=20430)
20	26770949	26770949	T	TACTCTTTGCGGGGAGCTGCCCATGAGAACGGGGTCCTTTGTCCGAAGGACACAGCTCTGGGAGCTGCCTCAGTCCTTGAGGGTTTGCTTGCAAACATAGCTCTCTGTCCCGCCACTCCAGAGATTAGGTGCTTATTTACTGCAGGCACCTGGAGTTCTGTGCAAACTTCTCACGCACAGAGAAATGTTATCTGGTGTAAGAAATAATAACAGGGAGCCATTCCCATGCTCTCAAGATTTCTTGTGACTGTTTGTAAGATGTATAGGCCAACCAAGAAAAAATGTCAACTGTCTTGTCTTTCTCACGTTTTTCTGTATAAATATGAGATGTTGAATAAAGTTGGTGTCAGACTGCGTCCCTTTGTGGTGACGTGTCTGAACCTCTTGACCCCATCTTTG…	intergenic	gene-ITGA1(dist=487550),gene-ISL1(dist=962677)
20	29829509	29829509	G	GATACATTGCGGGGAGCCGGTGAGGCATTCCACTCATGACAAAGGTCATGAGGAAGGAGGCTCGGCATACGCAAAGGCGGGATCGAGCCTCAGGAGTCCCCCCGGATATTCTCGAGCATTTTCCCCCAAAAAACCAGAGTCTGCCTACTTTATTGCTTTGTGCTCTCACCTCTGACTTTACTGGGGGCTGTCCCCTACCACCATCTCTCTCTCTCTCTGCCAAAGAGTTAACTTACAGCTCCAATTAATAAAGTTCCTGGGCAATTAGGAGTGTTTAAATCCAAACCCCTCAGATGGCTCTCTAACTCGCCTGACAAGTTTACCCGGACTCCTGCAGCTATGCATACGATTGTTTACAGTCTCCTAGCCTCCAGAGGCATGGGAAGCTTAAGATATTCA…	intergenic	gene-HCN1(dist=267183),gene-MRPS30(dist=231193)
20	34424783	34426081	TCCTAACTGCGGGGAGCCGGTGAGGCATTCCACTCATGACAAAGGTCATGAGGAAGGAGGCTCGGCACACGCAAAGGCGGGATCGAGCCTCAGGAGTCCCCCCGGATATTCTCGAGCATTTTCCCCCAAAAAAACCAGAGTCTGCCTACTTTATTGCTTTGTGCTCTCACCTCTGACTTTACTAGGGGCTGTTCCCTACCACCATCTCACTCTCTCTCTGTCAAAGAGTTAACTTACAGCTCCAATTAATAAAGTTCCTGGGCAATTAGGAGTGTTTAAATCCAAACCCCTCAGATGGCTCTCTAACTCGCCTGACAAGTTTACCCGGACTCCTGCAGCTATGCATACGATTGTTTACAGTCTCCTAGCCTCCAGAGGCACGGGAAGCTTAAGATATTC…	T	intergenic	gene-TRNAE-CUC-25(dist=482700),gene-DAB2(dist=578119)
20	34524210	34525417	CCTTCTTTATCTCCATTATTTAGAATAGGATGAGGATAGCTCAGTAGGAAAATTCAGTGAGAAAAGAGGCTGAGTAGCTTGGTTTACGCGAGAGACCAATAAAACTTCAAGACAAGAAGTTTGCACCACTTACGTAGGCCGCAGGCGTCCTTCCGTTCTCCCGAAGGAGAGGAGACACTGAGGCCTCCCCGGTCGGATCTTAGAAGCCCAGGCATAATTAGTAAGCATGGCGGGTTCCGCGCTCCAGATGGAGACTCAGCCAGAGTGAGAGAGAGAGCGACATGGGGAGACCAGTATTTCGAGAAACTGATCCCCATTCTTTATTTTCCATGGTCTACTTTTATACACTGAGATGTTATGCAAAAGTCACGTGGGGTCAGCAGTCCTGACTTTTATCAA…	C	intergenic	gene-TRNAE-CUC-25(dist=582127),gene-DAB2(dist=478783)
20	38828178	38828178	C	CAGGTGGTGCCGGGGACCAGCCCCGGCTGATCCAGGGTATTCGAAGGAGAGACGGCATAGGCGAGGATCAGGATACAATAGCTTCAATTAGATATTAATTAAAGATATAAAGAGTAATAGAATGAGGATAGCTCAGTAGGAAAATTCAGTGGAGAAAAGAGGCTGAGTAGCTTGGTTTACGCGGGAGACCAATAAAACTTCAAGACAAGAAGTTTGCACCACTTACGTAGGCCGCAGCGTCCTGTAAGCCCTCTCCTTCCTCCAGAGGTAGAGCACAGTCTCCCTCCTTTTCTTCGTCAATGGCAGAAAATATGATCTGTGCAGAAGGTGGAGACCCACTACCATCCACCGCTATAGCCTCTCCCATAGGCTATCCCACAGCCTCATGATGAGGGTCCA…	intergenic	gene-SPEF2(dist=255775),gene-PRLR(dist=87137)
20	43262899	43263366	CTGCCGGTGCCAGCCGGCAAAGTCGATCAGGTCCCGAGAACGTGCACGGCGGGGCCGAGAAAGAAACTAAAGCAAGAACTACAACAAAGATGGGGTCGAGAGGTTCAGACACATCTCCACGAAGGGACGCAGTCTGACACCAACTTTATTCAGCATCTTATATTTATACAGAAAAGCGTGAGAAAGACAAGACAGTTAACTTTTTCTTGGTTGACCTATACATCTTACAAACAGTCACAAGAAATCTTGAGAGCATGGGAATGGCTCCCTGTTATTATTTCTTACACGATTTCTCTGTGCGTGAGAAGTTTGCACAGAACTCCAGGTGTCTGCAGTAAATAAGCGCCTAATCTCTGGGGTGGCGGGACAGAGAGCTATGTTTGCAAGCAAACCCTCAAG…	C	intergenic	gene-CDH6(dist=908140),gene-TRNAC-GCA-210(dist=468643)
20	50431627	50431627	T	TACCATTGTGCCGGGGACCAGCCCCGGCTGATCCAGGGTATTCGAAGGAGAGACGGCGTAGGCGAGGATCAGGATACAATAGCTTCAATTAGATATTAATTAAAGATATAAAGAGTAATAGAATAAGGATAGCTCAGTAGGAAAATTCAGTGGAGAAAAGAGGCTGAGTAGCTTGGTTTACGCGGGAGACCAATAAAACTTCAAGACAAGAAGTTTGCACCACTTACGTAGGCCGCAGGCGTCCTTCCGTTCTCCCGAAGGAGAGGAGACACTGAGGCCTCCCCGGTCGGATCTTAGAAGCCCAGGCATAATTAGTAAGCATGGTGGGTTCCGCGCTCCAGATGGAGACTCAACCAGAGTGAGAGAGAGAGCGACATGGGGAGACCAGTATTTCGAGAA…	intergenic	gene-CDH10(dist=1432415),gene-TRNAC-GCA-211(dist=146510)
20	52209081	52209081	T	TAGCTTTGTGTTGGGGGCCAGAGTGAGGTACTCCGCCCGTGACAAAGGTCATGAGGAAGGAGGCTCGACATACGCAAAGGCGGGATCGAGCCTCAGGAGTCCCCCTGGAACTCCTCGAGCATCTACCCCCATAACCAGAGCCTGCCTACTTTACTACTTTGTGCTCACCTACACCTCTGACTTTACGGGGGGCTGTCCCCCACCACCTCTTTTGGAGAAGGAGTTAATTTAGAGCTCCAGTTTATAATAATTCCTGGGCGTGATAAGAGTGTTTTAACCTACAAACTCCTCTGAAGGTTCTCTAGCCTGCCTGACAGGCTCGTCCGGCCACATGTGATTGCTCACAGCCTCCCAACCGTGAGAGGCACAAGATGCTTTAAACCCTCTAAAAACGGGTTC…	intergenic	gene-TRNAC-GCA-212(dist=488671),gene-TRNAC-GCA-213(dist=449730)
20	53826690	53826690	T	TGATAGAGGATCGAGCCTCCTTCCTCATGACCTTTGCCGTGGGCGGAGTACCTCACTCTGGCCCCCAACA	intronic	gene-CDH18
20	55054977	55054977	G	GGTCAGGTGCGGGGAGCCGGTGAGGCATTCCACTCGTGACAAAGGTCATGAGGAAGGAGGCTCGGCATACGCAAAGGCGGGATCGAGCCTCAGGAGTCCCCCCGGATATTCTCGAGCATTTTCCCCCAAAAAACCAGAGTCTGCCTACTTTATTGCTTTGTGCTCTCACCTCTGACTTTACTGGGGGCTGTCCCCTACCACCGTCTCTCTCTCTCTGTGTCAAAGAGTTAACTTACAGCTCCAATTAATAAAGTTCCTGGGCAATTAGGAGTGTTTAAATCCAAACCCCTCTGATGGCTCTCTAACTCGCCTGACAAGTTTACCCGGACTCCTGCAGCTATGCATACGATTGTTTACAGTCTCCCAGCCTCGAGAGGCATGGGAAGCTTAAGATATTCA…	intergenic	gene-CDH18(dist=1116329),gene-BASP1(dist=853783)
20	56456218	56456296	GACCTTTGTCATGGGCGGAGTACCTCACGCCGGCCCCCAACAGTTAAATCTGCTGTACAGCAAAGTGACTCAGTTATAC	G	intronic	gene-MYO10
20	57626690	57635702	GCATAGTTGTTGGGGGCCAGAGTGAGGTACTCCGCCCGTGACAAAGGTCATGAGGAAGGAGGCTCGACATACGCAAAGGCGGGATCGAGCCTCAGGAGTCCCCCTGGAACTCCTCGAGCATCTACCCCCATAACCAGAGCCTGCCTACTTTACTACTTTGTGCTCACCTACACCTCTGACTTTACGGGGGGCTGTCCCCCACCACCTCTTTTGGAGAAGGAGTTAACTTAGAGCTCCAGTTTATAATAATTCCTGGGCGTGATAAGAGTGTTTTAACCTACAAACTCCTCTGAAGGTTCTCTAGCCTGCCTGACAGGCTCGTCCGGCCACATGTGATTGCTCACAGCCTCCCAACCGTGAGAGGCACAAGATGCTTTAAACCCTCTAAAAACGGGTTCT…	G	intronic	gene-FBXL7
20	59426226	59427522	CTGTTGGGGGCCAGAGTGAGGTACTCCGCCCGTGACAAAGGTCATGAGGAAGGAGGCTCGACATACGCAAAGGCGGGATCGAGCCTCAGGAGTCCCCCTGGAACTCCTCGAGCATCTACCCCCATAACCAGAGCCTGCCTACTTTACTACTTTGTGCTCACCTACACCTCTGACTTTACGGGGGGCTGTCCCCCACCACCTCTTTTGGAGAAGGAGTTAACTTAGAGCTCCAGTTTATAATAATTCCTGGGCGTGATAAGAGTGTTTTAACCTACAAACTCCTCTGAAGGTTCTCTAGCCTGCCTGACAGGCTCGTCCGGCCACATGTGATTGCTCACAGCCTCCCAACCGTGAGAGGCACAAGATGCTTTAAACCCTCTAAAAACGGGTTCTTTAGAG…	C	intronic	gene-DNAH5
20	59994139	59995262	GGGGATGTGCGGGGAGCGAGCTCCGCCTCTGGCAAAGGTCATGAGGAAGGAGGCTTGGCATACGCAAAGGCGGGATCAAGCCTCAGGAGTCTCCCTGGAAATTCTCGAGCATATACCCCCAAAACCAGAGTCTGCCTACTTTCTGCTTTGTGCTTTCACCTACACCTCTGACTTTACGGGGGGCTGTCCCCCACTACCTCTCTGAAATAAGTTAGCTTACAGCTCCAGTTAATAATTCCTGGGTGTGACAGTGTTTAACCTACAAACTCCTTTGGAAATCCTCTAGCCTGCCTGAATAGGTTTTTCCGGCCTCATGTGATTGTTCAAAGCCTCCCAACTGTGAGAGGCAGGAGATGTTCTAAACTGTCTAAACACAGATTCTTTTGAGTAGTTAAAAGA…	G	intergenic	gene-DNAH5(dist=502995),gene-CTNND2(dist=1219229)
20	60575834	60584938	ACATATTATTGTTGGGGGCCAGAGTGAGGTACTCCGCCCATGGCAAAGGTCATGAGGAAGGAGGCTCGACATACGCAAAGGCGGGATCGAGCCTCAGGAGTCCCCCTGGAACTCCTCGAGCATCTACCCCCATAACCAGAGCCTGCCTACTTTACTACTTTGTGCTCACCTACACCTCTGACTTTACGGGGGGCTGTCCCCCACCACCTCTTTCGGAGAAGGAGTTAACCTAGAGCTCCAGTCAATAAAAACTCTTGGGTGTGACAAGAGTGTTTTAACCTACAAACTCCTCTGAAGGTTCTCTAGCCTGCCTGACAGGCTCGTCCAGCCACATGTGATTGCTCACAGCCTCCTAACCGTGAGAGGCACGAGATGCTTTAAACCCTCTAAAAACAGGTT…	A	intergenic	gene-DNAH5(dist=1084690),gene-CTNND2(dist=629553)
20	61157997	61159075	CATGGACTGCGGGGAGCGAGCTCCGCCTCTGGCAAAGGTCATGAGGAAGGAGGCTTGGCATACGCAAAGGCGGGATCAAGCCTCAGGAGTCTCCCTGGAAATTCTCGAGCAATCTACCCCCAAAACCAGAGTCTGCCTACTTTCTGCTTTGTGCTTTCACCTACACCTCTGACTTTACGGGGGGCTGTCCCCCACTACCTCTCTGAAAAAAGTTAGCTTACAGCTCCAGTTAATAATTCCTGGGTGTGACAGTGTTTAACTTACAAACTCCTTTGGAAATCCTCTAGCCTGCCTGAATAGGTTTTTCCGGCCTCATGTGATTGTTCAGAGCCTCCCAACTGTGAGAGGCAGGAGATGTTCTAAACTGTCTAAACACAGATTCTTTTGAGTAGTTAAAAG…	C	intergenic	gene-DNAH5(dist=1666853),gene-CTNND2(dist=55416)
20	62161133	62161133	G	GAACAAGTGCCGGGGTCCAGCCCCGGTGGATTCAGGGAATTCGAAGCGGGGACGGCGTTGGCGAGGATCAGGAAACAATTGCTTAATTAAACGTTAATTAAGGATATAAAGAGTAATAGAATGAGGATAGCTCAGTGAGGAAATTCAGTGGAGAAAAGAGGCTGAATAATTCAGCCAGAAGGTAAGAGAAAGAACGACATGGTGAGACCAAGTTTCGGTGAACAAGGCCCGCACTTTTTTCCAAAGTAGTTTTTATACCTTAAGTTATACATAGAAGATAATGGGGGAAGGGGTAGAGTCATGCAGTAAGCCAGGCTTTCTTCCTGCAAACTTATCATATGCAAAAGTTTAGGTGATTTGCATCATCTTCTGGCCTGGAGGCCTTTTTCTCTAAAGGTG…	intronic	gene-CTNND2
20	64097710	64098988	CTGTTGGGGGCCAGAGTGAGGTACTCCGCCCGTGACAAAGGTCATGAGGAAGGAGGCTCGACATACGCAAAGGCGGGATCGAGCCTCAGGAGTCCCCCTGGAACTCCTCGAGCATCTACCCCCATAACCAGAGCCTGCCTACTTTACTACTTTGTGCTCACCTACACCTCTGACTTTACGGGGGGCTGTCCCCCACCACCTCTTTTGGAGAAGGAGTTAACTTAGAGCTCCAGTTTATAATAATTCCTGGGCGTGATAAGAGTGTTTTAACCTACAAACTCCTCTGAAGGTTCTCTAGCCTGCCTGACAGGCTCGTCCGGCCACATGTGATTGCTCACAGCCTCCCAACCGTGAGAGGCACAAGATGCTTTAAACCCTCTAAAAACGGGTTCTTTAGAG…	C	intronic	gene-SEMA5A
20	64099188	64099315	TCTTTGGGATTGGAATGAAAACTGACCTTTTCCAGTCCTGTGGCCACTGCTGAGTTTTCCAAATTTGCTGGCATATTGAATGCAGCACTTTCACAGCATCATCTTTCAGGATTTGGGATAGCTCAACT	TG	intronic	gene-SEMA5A
20	64230109	64239093	AAAACTGTCATGTGCCGGGGACCAGCCCCGGCTGATCCAGGGTATTCAAAGGAGAGACGGCGTCGGCGAGGGTCAGGATACGATAGCTTCAATTAGGTATTAATTAAAGATATAAAGAGTAATAGAATAAGGATAGCTCAGTAGGAAAATTCAGTGGAGAAAAGAGGCTGAGTAGCTTGGTTTACGCGGGAGACCAATAAAACTTCAAGACAAGAAGTTTGCACCACTTACGTAGGCCGCAGGCGTCCTTCCGTTCTCCCGAAGGAGAGGAGACACTGAGGCCTCCCCGGTCGGATCTTAGAAGCCCAGGCATAATTAGTAAGCATGGTGGGTTCCGCGCTCCAGATGGAGACTCAGCCAGAGGGAGAGAGAGACATGGGGAGACCAGTATTTTGAGAA…	A	intergenic	gene-SEMA5A(dist=7277),gene-MTRR(dist=1071012)
20	65147362	65148666	AGATACAGGTGGGATGCGGGGAGCCGGTGAGGCATTCCACTCGTGACAAAGGTCATGAGGAAGGAGGCTCGGCATACGCAAAGGCGGGATCGAGCCTCAGGAGTCCCCCCGGATATTCTCGAGCATTTTCCCCCAAAAAACCAGAGTCTGCCTACTTTATTGCTTTGTGCTCTCACCTCTGACTTTACTGGGGGCTGTCCCCTACCACCATCTCTCTCTCTGTGTGTCAAAGAGTTAACTTACAGCTCCAATTAATAAAGTTCCTGGGCAATTAGGAGTGTTTAAATCCAAACCCCTCTGATGGCTCTCTAACTCGCCTGACAAGTTTACCCGGACTCCTGCAGCTATGCATACGATTGTTTACAGTCTCCTAGCCTCCAGAGGCACGGGAAGCTTAAG…	A	intergenic	gene-SEMA5A(dist=924530),gene-MTRR(dist=161439)
20	65147377	65148666	GCGGGGAGCCGGTGAGGCATTCCACTCGTGACAAAGGTCATGAGGAAGGAGGCTCGGCATACGCAAAGGCGGGATCGAGCCTCAGGAGTCCCCCCGGATATTCTCGAGCATTTTCCCCCAAAAAACCAGAGTCTGCCTACTTTATTGCTTTGTGCTCTCACCTCTGACTTTACTGGGGGCTGTCCCCTACCACCATCTCTCTCTCTGTGTGTCAAAGAGTTAACTTACAGCTCCAATTAATAAAGTTCCTGGGCAATTAGGAGTGTTTAAATCCAAACCCCTCTGATGGCTCTCTAACTCGCCTGACAAGTTTACCCGGACTCCTGCAGCTATGCATACGATTGTTTACAGTCTCCTAGCCTCCAGAGGCACGGGAAGCTTAAGATATTCAAATAGCTT…	G	intergenic	gene-SEMA5A(dist=924545),gene-MTRR(dist=161439)
20	65273708	65274204	GTACTACTTTGTGCTCTTTCCTACATCTCTGACTTTACAGGGGGCTGTCCCCCACCACCTCTTTCGGAGAAGGAGTTAACCTAGAGCTCCAGTCAATAAAAACTCTTGGGTGTGACAAGAGTGTTTTAACCTACAAACTCCTCTGAAGGTTCTCTGGCCTGCCTGACAGGCTTGTCCGGCCACATGTGATTGCTCACAGCCTCCCAACCTTGAGAGGCACGAGATGCTTTAAACCCTCTAAAAACAGGTTCTTTAGAGAAGTTAGAAAACTATTAGTATAAGTATAATGGGCTGATTAGAAATTGTGTTGGTGAAGGGTTTTTCATTTGTTGAGCCAATGTTTGTTGCTAAGTCTCCACATCCCCTGCCCTTACACACATTAATGAATATATAGAATTA…	G	intergenic	gene-SEMA5A(dist=1050876),gene-MTRR(dist=35901)
20	65744136	65745189	AAGCAGAGTGCGGGGAGCGAGCTCCGCCTCTGGCAAAGGTCATGAGGAAGGAGGCTTGGCATACGCAAAGGTGGGATCAAGCCTCAGGAGTCTCCCTGGAAATTCTCGAGCAATCTACCCCCAAAACCAGAGTCTGCCTACTTTCTGCTTTGTGCTTTCACCTACACTTCTGACTTTACGGGGGGCTGTCCCCCACTACCTCTCTGAAAAAAGAGTTAGCTTATAGCTCCAGTTAATAATTCCTGGGTGTGACAGTGTTTCAACCTACAAACTTCCTTGGAAGTCCTCTAGCCTGCCTGAATAGGTTTTTCCGGCCACATGTGATTGCTCAGAGCCTCCAAACTGTGAGAGGCATGAGATGTTCTAAATTGTCTAAATACAGATTCCTTTGAGCAGTCA…	A	intronic	gene-ADCY2
20	66857773	66857773	C	CCATTCCTGTTGGGGGCCAGAGTGAGGTACTCCGCCCATGGCAAAGGTCATGAGGAAGGAGGCTCGACATACGCAAAGGCGGGATCGAGCCTCAGGAGTCCCCCTGGAACTCCTCGAGCATCTACCCCCATAACCAGAGCCTGCCTACTTTACTACTTTGTGCTCACCTACACCTCTGACTTTACGGGGGGCTGTCCCCCACCACCTCTTTCGGAGAAGGAGTTAACCTAGAGCTCCAGTCAATAAAAACTCTTGGGTGTGACAAGAGTGTTTTAACCTACAAACTCCTCTGAAGGTTCTCTAGCCTGCCTGACAGGCTCGTCCAGCCACATGTGATTGCTCACAGCCTCCTAACCGTGAGAGGCACGAGATGCTTTAAACCCTCTAAAAACAGGTTCT…	intergenic	gene-MED10(dist=31781),gene-ICE1(dist=794508)
20	67015929	67015929	G	GCCGGGGTCCTGCCCCGGCTGATCCAGGGTATTCGAAGCGGGGACGGCGTCGGCGACCTATTTATTTAAATATTTTATCAAAGATATAAAGAGTAATAGGATGAGGATAGCTCAGCAGGAAAATTCAGTGGAGAAAAGAGGCTGAGTAGCTTGGTTTACGCGGGAGACCAATAAAACTTCAAGACAAGAAGTTTGCACCACTTACGTAGGCCGCAGGCGTCCTTCCGTTCTCCCGAAGGAGAGGAGACACTGAGGCCTCCCCGGTTGGA	intergenic	gene-MED10(dist=189937),gene-ICE1(dist=636352)
20	67015931	67016431	CTTAGAAGCCCAGGCATAATTAGTAAGCATGGTGGGTTCCGCGCTCCAGATGGAGACTCAGCCAGAGTGAGAGAGAGCGACATGGGGAGACCAGTATTTCGAGAAACTGATCCCAATTCTTTATTTTCCATGGTCTACTTTTATACACTGAGATGTTATGCAAAAGTCACGCGGGGTCAGCAGTCCTGACTTTTATCAAAGTCAGGTGCTTCATACAAAGGTATACAGAGGTCTTAGGGGTGTTACATCATCTTCTGGCCAGGGGGGCCTGCTGACAATTTACGACCCTCTCCTTGTGACAGCGGTCAGTCAATCAGGACACTTATTTCTCCAGGGCTGATTATTCTCAAAACAGACGCCACCCAAATAAAGTTACATTCCTACAGGGTGAGGGTGTAG…	C	intergenic	gene-MED10(dist=189939),gene-ICE1(dist=635850)
20	67016431	67016431	T	TATGGAGACTTAGCAACAAACATTGGCTCAACAAATGAAAAACCCTTCACCAACACAATTTCTAATTAGCCCACTATACTTATACTAATAGTTTTCTAACTTTTCTAAGGAACCTGTTTTTAGAAGGTTTAAAGCATCTTGTGCCTCTCACGGTTGGGAGGCTGTGAGCGATCACATGTGGCCGGACAAGCCTGTCAGGCAGGCCAGAGAACCTTCAGAGGAGTTTGTAGGTTAAAACACTCTTATCACGCCCAGGAATTATTATAAACTGGACCTCTAAGTTAACTCCTTCTCCAAAAGAGGTGGTGGGGGACAGCCCCCTGTAAAGTCAGAGGTGTAGGTGAGCACAAAGTAGTAAAGTAGGCAGGCTCTGGTTATGGGGGTAGATGCTCGAGGAGT…	intergenic	gene-MED10(dist=190439),gene-ICE1(dist=635850)
20	67236192	67237312	GCTCCTTTGTGGGGAGCGAGCTCCGCCTCTGGCAAAGGTCATGAGGAAGGAGGCTTGGCATACGCAAAGGCGGGATCAAGCCTCAGGAGTCTCCCTGGAAATTCTCGAGCATATACCCCCAAAACCAGAGTCTGCCTACTTTCTGCTTTGTGCTTTCACCTACACCTCTGACTTTACGGGGGGCTGTCCCCCACTACCTCTCTGAAAAAAGTTAGCTTACAGCTCCAGTTAATAATTCCTGGGTGTGACAGTGTTTAACTTACAAACTCCTTTGGAAATCCTCTAGCCTGCCTGAATAGGTTTTTCCGGCCACATGTGATTGTTCAGAGCCTCCCAACTGTGAGAGGCAGGAGATGTTCTAAACTGTCTAAACACAGATTCTTTTGAGTAGTTAAAAGA…	G	intergenic	gene-MED10(dist=410200),gene-ICE1(dist=414969)
21	3729001	3730220	GGGTAGCTGCCGGGGACCAGCCCCGGCTGAACCAGGGTATTCGAAGGAGAGACGGCGTAGGCGAAGATCAGGAAACAATTGCTTAATTAAATGTTAATTAAGGATATAAAGAGTAATAGAATGAGGATAGCTCAGTAGGAAAATTCAGTGAAGAAAAGAGGCTGAAATAAGGATAGCTCAGTGAGGAAATTCAGTGGAGAAAAGAGGCTGAATAATTCAGCCAGAAGGTAAGAGAAAGAACGACATGGTGAGACCAAGTTTCGGTGAACAAGGCCCGCACTTTATTTTTCAAAGTAGTTTTTATACCTTAAGTTATGCACAGAGGATAATGGGGGAAGGGGTAGAGTCTTGCAGCAAACCAGGCTTTCTTCCTGCAAACTTATCATATGCAAAAGCTTA…	G	intergenic	gene-TRNAE-UUC-93(dist=500669),gene-GABRB3(dist=136124)
21	5370094	5370094	T	TAGGGGTTTGAGGCTCGATCCCGCCTTTGCGTATGTCGAGCCTCCTTCCTCATGACCTTTGTCACGGGCGGAGTACCTC	intronic	gene-CHSY1
21	16728991	16730201	CTATGCTTGCCGAGGACCAGCCCCGGCTGATCCAGGGTATTCGAAGAAGAGACGGCATAGGCGAGGATCAGGAAACAATTGCTTAATTAAACATTAATTAAGGATATAAAGAGTAATAGAATAAGGATAGCTCAGTAAGGAAATTCAGTGGAGAAAAGAGGCTGAATAATTCAGCCAGAAGGTAAGAGAAAGAACGACATGGTGAGACCAAGTTTCGGTGAACAAGGCCCGCACTTTATTTTCCAAAGTAGTTTTTATACCTTAAGTTATGCATAGAGGATAATGGGGGAAGGGGTAGAGTCATGCAGTAAGCCAGGCTTTCTTCCTGCAAACTTATCATATGCAAAAGTTTAGGTGATTTGCATCATCTTCTGGCCCAGAGGCCTGTTAACATTTTAA…	C	intergenic	gene-KLHL25(dist=112438),gene-TRNAG-CCC-133(dist=79337)
21	19828515	19829810	CTCCACCTGCCGAGGTCCAGCCCCAGCTGATCCAGGGTATTCGAAGGGGAGACGGCGTCGGCGACTATTTACATATTTATCAAAGATATAAAGAGTAATAGAATGAGGATAGCTCAGTAGGAAAATTCAGTGGAGAAAAGAAGCTGAGTAGCTTGGTTTACGCGAGAGACCAATAAAACTTCAAGACAAGAAGTTTGCACCACTTACGTAGGCCGCGGGCGTCCTTCCGTTCTCCCGAAGGAGAGGAGACACTGAGGCCTACCCGGTCGGATCTTAGAAGCCCAGGCATAATTAGTAAACATGGTGGGTTCCGTGCTCCAGATGGAGACTCAGCTGGAAGTTAAAGGGAAGAATTACATGGGGAGACCAAACGTTGGTGAGCAAGGCACGTAGCTTTAT…	C	intergenic	gene-LOC529925(dist=6485),gene-LOC101906218(dist=86720)
21	25684180	25684180	A	AATGTGGGTGCCGGGGTCCAGCCCCGGTGGATCCAGGGAATTCGAAGCGGGGACGGCGTCGGCAAGGATCAGGAAACAATTGCTTAATTAAACATTAATTAAGGATATAAAGAGTAATAGAATGAGGATAGCTCAGTGAGGAAATTCAGTGGAGAAAAGAGGCTGAAATAAGGATAGCTCAGTGAGGAAATTCAGTGGAGAAAAGAGGCTGAATAATTCAGCCAGAAGGTAAGAGAAAGAAAGACAAGGCGAGACCAAGTTTCGGTGAACAAGGCCCGCACTTTTTTCCAAAGTAGTTTTTATACCTTAAGTTATGCATAGAGGATAATGGGGGAAGAGGTAGAGTCATGCAGTAAGCCAGGCTTTCTTCCTGCAAACTTATCATATGCAAAAGTTTAG…	intergenic	gene-KIAA1024(dist=57108),gene-MTHFS(dist=266012)
21	25848482	25848482	T	TCTTTAATGCCAGGGTCCAGCCCCGGCTGATCCAGGGTATTCGAAGGGGAGACGGCTTAGGCGACTATTTAAATATTCATCAAAGATATAAAGAGTAATAGAATGAGGATAGCTCAGCAGGAAAATTCAGTGGAGAAAAGAGGCTGAGTAGCTTGGTTTACGCAGGAGACCAATAAAACTTCAAGACAAGAAGCTTGCACCACTTACGTAGGCCGCAGGCGTCCTTCCGTTCTCCCGAAGGAGAGGAGACACTGAGGCCTCCCCGGTCGGATCTTAGAAGCCCAGGCATAATTAGTAAGCATGGCGGGTTCCACGCTCCAGATGGAGACTCAGCCAGAGTGAGAGAGAGAGAGAGACATGGGGAGACCAGTATTTCGAGAAACTGATCCCAATTCTTTA…	intergenic	gene-KIAA1024(dist=221410),gene-MTHFS(dist=101710)
21	26143779	26145160	CCATGTGTGCCGGGGACCAGCCCCGGCTGATCCAGGGTATTCGAAGGAGAGACGGCGTAGGCGAGGATCAGGATACGATAGCTTCAATTAGGTATTGTTGGGCGCCACCTGCCGGGGTCCTGCCCCGGCTGATCCAGGGTATTCGAAGCGGGGACGGCGTCGGCGACCTATTTATTTAAATATTTTATCAAAGATATAAAGAGTAATAGGATGAGGATAGCTCAGTAGGAAAATTCAGTGGAGAAAAGAGGCTGAGTAGCTTGGTTTACGCGGGAGACCAATAAAACTTCAAGACAAGAAATTTGCACCACTTACGTAGGCCGCAGGCGTCCTTCCGTTCTCCCGAAGGAGAGGAGACACTCAGGCCTCCCCGGTCGGATCTTAGAAGCCCAGGCATAA…	C	intergenic	gene-FAH(dist=2744),gene-CTXND1(dist=10136)
21	29418328	29419632	TATAACTCTGTTGGGGGCCAGAGTGAGGTACTCCGCCCATGGCAAAGGTCATGAGGAAGGAGGCTCGACATACGCAAAGGCGGGATCGAGCCTCAGGAGTCCCCCTGGAAATCCTCGAGCGTCTACCCCCATAACCAGAGCCTGCCTACTTTACTACTTTGTGCTCTTACCTACACCTCTGACTTTACGGGGGGCTGTCCCCCACCACCTCTTTCGGAGAAGGAGTTAACCTAGAGCTCCAGTCAATAAAAACTCTTGGGTGTGACAAGAGTGTTTTAACCTACAAACTCCTCTGAAGGTTCTCTAGCCTGCCTGACAGGCTCGTCCGGCCACATGTGATTGCTCACAGCCTCCCAACCGTGAGAGGCACGAGATGCTTTAAACCTTCTAAAAACAGGT…	T	intergenic	gene-LOC789895(dist=186588),gene-CHRNA7(dist=95576)
21	35182030	35182893	ATGTTGGGGGCCAGAGTGAGGTACTCCGCCCATGGCAAAGGTCATGAGGAAGGAGGCTCGACATACGCAAAGGCGGGATCGAGCCTCAGGAGTCCCCCTGGAAATCCTCGAGCGTCTACCCCCATAACCAGAGCCTGCCTACTTTACTACTTTGTGCTCACCTACACCTCTGACTTTACGGGGGGCTGTCCCCCACCACCTCTTTCGGAGAAGGAGTTAACCTAGAGCTCCAGTCAATAAAAACTCTTGGGTGTGACAAGAGTGTTTTAACCTACAAACTCCTCTGAAGATTCTCTAGCCTGCCTGACAGGCTCGTCCAGCCACATGTGATTGCTCACAGCCTCCTAACCGTGAGAGGCACAAGATGCTTTAAACCCTCTAAAAACAGGTTCTTTAGAA…	A	intronic	gene-STXBP6
21	35182031	35182556	TGTTGGGGGCCAGAGTGAGGTACTCCGCCCATGGCAAAGGTCATGAGGAAGGAGGCTCGACATACGCAAAGGCGGGATCGAGCCTCAGGAGTCCCCCTGGAAATCCTCGAGCGTCTACCCCCATAACCAGAGCCTGCCTACTTTACTACTTTGTGCTCACCTACACCTCTGACTTTACGGGGGGCTGTCCCCCACCACCTCTTTCGGAGAAGGAGTTAACCTAGAGCTCCAGTCAATAAAAACTCTTGGGTGTGACAAGAGTGTTTTAACCTACAAACTCCTCTGAAGATTCTCTAGCCTGCCTGACAGGCTCGTCCAGCCACATGTGATTGCTCACAGCCTCCTAACCGTGAGAGGCACAAGATGCTTTAAACCCTCTAAAAACAGGTTCTTTAGAAA…	T	intronic	gene-STXBP6
21	35182031	35183289	TGTTGGGGGCCAGAGTGAGGTACTCCGCCCATGGCAAAGGTCATGAGGAAGGAGGCTCGACATACGCAAAGGCGGGATCGAGCCTCAGGAGTCCCCCTGGAAATCCTCGAGCGTCTACCCCCATAACCAGAGCCTGCCTACTTTACTACTTTGTGCTCACCTACACCTCTGACTTTACGGGGGGCTGTCCCCCACCACCTCTTTCGGAGAAGGAGTTAACCTAGAGCTCCAGTCAATAAAAACTCTTGGGTGTGACAAGAGTGTTTTAACCTACAAACTCCTCTGAAGATTCTCTAGCCTGCCTGACAGGCTCGTCCAGCCACATGTGATTGCTCACAGCCTCCTAACCGTGAGAGGCACAAGATGCTTTAAACCCTCTAAAAACAGGTTCTTTAGAAA…	T	intronic	gene-STXBP6
21	35182909	35183285	TCTGGAAAATAAAGAATTGGGATCAGTTTCTCGAAATACTGGTCTCCCCATGTCGCTCTCTCTCTCACTCTGGCTGAGTCTCCATCTGGAGCGCGGAACCCACCATGCTTACTAATTATGCCTGGGCTTCTAAGATCCGACCGGGGAGGCCTCAGTGTCTCCTCTCCTTCGGGAGAATGGAAGGACGCCTGCGGCCTACGTAAGTGGTGCAAGCTTCTTGTCTTGAAGTTTTATTGGTCTCCCGCGTAAACCAAGCTACTCAGCCTCTTTTCTCCACTGAATTTTCCTACTGAGCTATCCTCATCCTATTACTCTTTTTATCTTTGATAAAATATTTAAATAAATAGGTCGCCGACGCCGTCCCCGCTTCGAATACC	T	intronic	gene-STXBP6
21	50326370	50326370	G	GACAGGGTGCCGGGAGCCGGCATATTGCATATTGAGTGCATATTGCATATTGAGTGCAGCACTTTTCAGGATCTGGAATAGCTCAACTGGAATTCTATCACTGCCGGTAGCCAGCGTGAGGAACTCCGCCCATGACAAAGGTCATGAGGAAGGAGGCTTGGCATACGCAAAGGCGAGATCAAGCCTCAGGAGTCTCCCTGGAAATTCTCGAGCATATACCCCCAAAACCAGAGTCTGCCTACTTTCTGCTTTGTGCTTTCACCTACACCTCTGACTTTACGGGGGGCTGTCCCCCACTACCTCTCTGAAAAAAGTTAGCTTACAGCTCCAGTTAATAATTCCTGGGTGTGACAGTGTTTAACCTACAAACTCCTTTGGAAATCCTCTAGCCTGCCTGAA…	intergenic	gene-LOC100138454(dist=158877),gene-LRFN5(dist=1001329)
21	51270585	51274535	ATTCGTCTTTCAAGCCTATGGTTTTTCCTGTGGTCATGTATGGATGTGAGAGTTGGACTGTGAAGAAGGCTGAGCGCCGAAGAATTGATGCTTTTGAACTGTGGTGTTGGAGAAGACTCTTGAGAGTCCCTTGGACTGTAAGGAGATCCAACCAGTCCATTCTGAAGGAGATCGGCCCTGGGATTTCTTTGGAAGGAATGATGCTAAAGCTGAAACTCCAGTACTTTGGCCACCTCATGCGAAGAGTTGACTCATTGGAAAAGACTCTGATGCTGGGAGGGATTGGGGGCAAGAGGAGAAGGGGACGACAGAGGATGAGATGGCTGGATGGCATCACTGACTCGATGGACGTGAGTCTGGGTGAACTGTGGGAGTTGGTGATGGACAGGGAGGCCTGGC…	A	intergenic	gene-LOC100138454(dist=1103092),gene-LRFN5(dist=53164)
21	51649673	51649673	G	GGCAGCCTTCCTCATGACCTTTGTCATGGGCGGAGTTCCTCACGCCGGAAGCCGGCA	intergenic	gene-LRFN5(dist=1402),gene-TRNAC-GCA-219(dist=1684593)
21	51930966	51932180	CCCTCAATGCCGGGAGCCGGCATATTGCATATTGAGTGCATATTGTATATTGAGTGCAGCACTTTTCAGGATCTGGAATAGCTCAACTGGAATTCTATCACTGCCAGCGTGAGGAACTCCGCCCATGACAAAGGTCATGAGGAAGGAGGCTTGGCATACGCAAAGGCGGGATCAAGCCTCAGGAGTCTCCCTGGAAATTCTCGAGCAATCTACCCCCAAAACCAGAGTCTGCCTACTTTCTGCTTTGTGCTTTCACCTACACCTCTGACTTTACGGGGGGCTGTCCCCCACTACCTCTCTGAAAAAAGTTAGCTTACAGCTCCAGTTAATAATTCCTGGGTGTGACAGTGTTTAACCTGCAAACTCCTTTGGAAATCCTCTAGCCTGCCTGAATAGGTT…	C	intergenic	gene-LRFN5(dist=282695),gene-TRNAC-GCA-219(dist=1402086)
21	53282536	53282536	T	TCAAAAGTGCCGGGGACCAGCCCCGGCTGATCCAGGGTATTCGAAGGAGAGACGGCATGGGCGAGGATCAGGATACAATAGCTTCAATTAGATATTAATTAAAGATATAAAGAGTAATAGGATGAGGATAGCTCAGTAGGAAAATTCAGTGGAGAAAAGAGGCTGAGTAGCTTGGTTTATGCGGGAGACCAATAAAACTTCAAGACAAGAAGTTTGCACCACTTACGTAGGCCGCAGGCGTCCTTCCGTTCTCCCGAAGGAGAGGAGACACTGAGGCCTCCCCGGTCGGATCTTAGAAGCCCAGGCATAATTAGTAAGCATGGTGGGTTCCGCGCTCCAGATGGAGACTCAGCCAGAGTGAGAGAGAGAGTGACATGGGGAGACCAGTATTTCGAGAAA…	intergenic	gene-LRFN5(dist=1634265),gene-TRNAC-GCA-219(dist=51730)
21	59188983	59190285	AGGTCCATTGCCGGGGACCAGCCCCGGCTGATCCAGGGTATTCGAAGGAGAGACGGCGTAGGCGAAGATCAGGAAACAATTGCTTAATTAAACGTTAATTAAGGATATAAAGAGTGATAGAATGAGGATAGCTCAGTAGGAAAGTTCAGTGGAGAAAAGAGGCTGAGTAGCTTGGTTTACGCGGGAGACCAATAAAACTTCAAGACAAGAAGTTTGCACCACTTACGTAGGCCACAGGCATCCTTCCGTTCTCCCGAAGGAGAGGAGACACTGAGGCCTCCCCGGTCGGATCTTAGAAGCCCAGGCATAATTAGTAAGCATGGTGGGTTCCGCGCTCCAGATGGAGACTCAGCCAGAGTGAGAGAGAGAGAGACATGGGGAGACCAGTATTTCGAGAAA…	AA	intergenic	gene-SERPINA14(dist=16693),gene-SERPINA12(dist=15017)
22	1397535	1397535	C	CTCCAGTTGACGAGGACCAGCCCCGGCTGATCCAGGGTATTCGAAGGGGAGACGGTGTCGGCGACTATTTATTTATTTATCAAAGATATAAAGAGTAATAGAATGAGGATAGCTCAGTAGGAAAATTCAGTGGAGAAAAGAAGCTGAGTAGCTTGGTTTACGCGGGAGACCAATAAAACTTCAAGACAAGAAGTTTGCACCACTTACGTAGGCCACAGGCGCCCTCTTGAATAGCGGAAGGTGCCTCACCCTAGACACCTCCTCTAGTGGGTCTTAGAAGCCCAGGCATAATTAGTAAGCGTGGTGGGTTCCGCGCTCCAGATGGAGACTCAGCTGGAAGTTAAAAGAAAGAATGACATGGGGAGACCAAGCGTTGGTGAGCAAGGCCCGTAGCTTTAT…	intergenic	gene-EGFR(dist=275995),gene-SEC61G(dist=62245)
22	2608837	2608894	AAGAGTAATAGAATGAGGATAGCTCAGTAGGAAAATTCAGTGGAGAAAAGAGGCTGAG	ATA	intergenic	gene-EOMES(dist=493030),gene-CMC1(dist=67499)
22	8269644	8270123	AAGATGATTGCCGGAGCCAGCCGGCAAAGTCGATCAGGTCCCGAGAACGTGCACGGCGGGGCTAAGAAAGAAACTAAAGCAAGAGACTACAAAGATGGGGTCGAGAGGTTCAGACACGTCACCACGAAGGGACGCAGTCTGACACCAACTTTATTCAACATGTCATATTTGTACAGAAAAGCGTGAGAGAGACAAAACAGTTGACATTTTTTCTTGGTTAGCCTATACATCTTACAAACAGTCACAAGAAATCTTGAGAGCATGGGAATGGCTCCCTGTTATTATTTCTTACACCAGATAACATTTCTCTGTGCGTGAGAAGTTTGCACAGAACTCCAGGTGCCTGCAGTAAATAAGCGCCTAATCTCTGGGGTGGCGGGACAGAGAGCTATGTTTGCA…	A	intergenic	gene-PDCD6IP(dist=179134),gene-TRNAE-CUC-26(dist=18904)
22	8588150	8588150	T	TGGGTGGTGCTGGGGTCCTGCCCCGGCTGATCCAGGGTATTCGAAGCGGGTACGGCGTCGGCGACCTATTTATTTAAATATTTTATCAAAGATATAAAGAGTAATAGGATGAGGATAGCTCAGTAGGAAAATTCAGTGGAGAAAAGAGGCTGAGTAGCTTGGTTTACGCGGGAGACCAATAAAACTTCAAGACAAGAAGTTTGCACCACTTACGTAGGCCGCAGGCGTCCTTCCGTTCTCCCGAAGGAGAGGAGACACTGAGGCCTCCCCGGTCGGATCTTAGAAGCCCAGGCATAATTAGTAAGCATGGTGGGTTCCGCGCTCCAGATGGAGACTCAACCAGAGTGAGAGAGAGAGCGACATGGGGAGACCAGTATTTCGAGAAACTGATCCCAATTC…	intergenic	gene-TRNAE-CUC-26(dist=299051),gene-TRNAK-UUU-30(dist=588911)
22	11226854	11228123	CCTTGGTTGCCGGGGACCAGCCCCGGCTGATCCAGGGTATTCGAAGGAGAGACGGCGTAGGCGAAGATCAGGAAACAATTGCTTAATTAAATGTTAATTAAGGATATAAAGAGTAATAGAATGAGGATAGCTCAGTAAAATTCAGTGAAGAAAAGAGGCTGAAATAAGGATAGCTCAGTGAGGAAATTCAGTGGAGAAAAGAGGCTGAAATAAGGATAGCTCAGTGAGGAAATTTAGTGCAGAAAAGAGGCTGAATAATTCAGCCAGAAGGTAAGAGAAAGAACGACATGGTGAGACCAAGTTTCGGTGAACAAGGCCCGCACTTTATTTTTCAAAGTAGTTTTTATACCTTAAGTTATGCACAGAGGATAATGGGGGAAGGGGTAGAGTCTTGCAGCA…	C	intronic	gene-ITGA9
22	13968044	13969317	GTGTTGGGGGCCAGAGTGAGGTACTCCGCCCATGGCAAAGGTCATGAGGAAGGAGGCTCGACATACGCAAAGGCGGGATCGAGCCTCAGGAGTCCCCCTGGAAATCCTCGAGCATCTACCCCCATAACCAGAGCCTGCCTACTTTACTACTTTGTGCTCACCTACACCTCTGACTTTACGGGGGGCTGTCCCCCACCACCTCTTTTGGAGAAGGAGTTAACTTAGAGCTCCAGTTTATAATAATTCCTGGGCGTGATAAGAGTGTTTTAACCTACAAACTCCTCTGAAGGTTCTCTGGCCTGCCTGACAGGCTCGTCCGGCCACATGTGATTGCTCACAGCCTACCAACCGTGAGAGGCACGAGATGCTTTAAACCTTCTAAAAACAGGTTCCTTAGAA…	G	intronic	gene-ULK4
22	20433399	20433399	A	AGTTCTCGTCAGGCAGCAAGCCAGGCTTTCTTCCTGCAAACTTATCAGCAGTAGGGCTGGTGACCCAAACTGCT	intergenic	gene-GRM7(dist=865768),gene-EDEM1(dist=765095)
22	22265334	22265334	G	GGTGGTGTGCTGGGGACCAGCCCCAGCTGATCCAGGGTATTCGAAGGAGAGACGGCCTAGGCGACTATTTATATGCTAATTAGAGATATAGATAACAATAGAATGAGGATAGCTCAGTAGGAAAATTCAGTGGAGAAAAGAAGCTGAGTAGCTTGGTTTACGCGGGAGACCAATAAAACTTCAAGACAAGAAGTTTGCACCACTTACGTAGGCCGCAGGCGCCCTCTCGAATAGCGGAAGGTGTCTCACCCTAGACTCCTTCTCGAGTGGGTCTTAGAAGCCCAGGCATGATTAGTAAGCGTGGTGGGTTCCGCGCTCCAGATGGAGACTCAGCTGGAAGTTAAAAGAAAGAATGACATGGGGAGACCAAGCGTTGGTGAGCAAGGCCCGTAGCTTTAT…	intergenic	gene-SETMAR(dist=240271),gene-LRRN1(dist=203538)
22	22619052	22619818	TTGAATATATAGAAGAAATAAGTATTAACCTTTGATATTAATCATATTACACCTTAGGCTAAGTAAATTCTTTCCTTAACTAAAACCCACTACACCCTCACCCTGTAGGAATGTAACTTTATTTGGGTGGCGTCTGTTTTGAGAATAATCAGCCCTGGAGAAATAAGTGTCCGGATTGACTGACCGCTGTCACAAGGAGAGGGTCGTAAATTGTCAGCAGGCCCCCCTGGCCAGAAGATGATGTAACACCCCTAAGACCTCTGTATACATTTGTGTGAAGCACCTGACTTTAATAAAAGTCAGGACTGCTGTCCCCACGTGACTTTTGTATAACATCTTAGTGTATAAAAACAGACTCTGGAAAATAAAGAATTGGGATCAGTTTCTCGAAATACTGGT…	T	intergenic	gene-LRRN1(dist=106789),gene-CRBN(dist=505695)
22	26326523	26327818	CCCTATGTGCCGGGGTCCTGCCCCGGCTGATCCAGGGTATTCGAAGCGGGGACGGCGTCGGCGACCTATTTATTTATTTAAATATTTTATCAAAGATATAAAGAGTAATAGGATGAGGATAGCTCAGTAGGAAAATTCAGTGGAGAAAAGAGGCTGAGTAGCTTGGTTTACGCGGGAGACCAATAAAACTTCAAGACAAGAAGTTTGCACCACTTACGTAGGCCGCAGGCGTCCTTCCGTTCTCCCGAAGGAGAGGAGACACTGAGGCCTCCCCGGTCGGATCTTAGAAGCCCAGGCATAATTAGTAAGCATGGTGGGTTCCGCGCTCCAGATGGAGACTCAACCAGAGTGAGAGAGAGAGTGACATGGGGAGACCAGTATTTCGAGAAACTGATCCCA…	C	intergenic	gene-CHL1(dist=118969),gene-CNTN3(dist=691260)
22	40757604	40758921	TCCCTGTTCGGGCACCACCTGCCGAGGACCAGCCCCGGCTGATCCAGGGTATTCAAAGGAGAGACGGCATAGGCGAGGATCAGGATACAATAGCTTCAATTAGATATTAATTAAAGATATAAAGAGTTATAGAATGAGGATAGCTCAGTAGGAAAATTCAGTGGAGAAAAGAGGCTGAGTAGCTTGGTTTACGCGGGAGACCAATAAAACTTCAAGACAAGAAGTTTGCACCACTTACGTAGGCCGCAGGCGTCCTTCTGTTCTCCCGAAGGAGAGGAGACACTGAGGCCTCCCCGGTCGGATCTTAGAAGCCCAGGCATAATTAGTAAGCATGGTGGGTTCCGCGCTCCAGATGGAGACTCAGCCAGAGTGAGAGAGAGAGAGCGACATGGGGAGACC…	T	intronic	gene-FHIT
22	41015288	41015288	G	GGGTTGCTGCCGGGGACCAGCCCCGGCTGATCCAGGGTATTCGAAGGAGAGACGGCGTAGGCGAAGATCAGGAAACAACTGCTTAATTAAACGTTAATTAAGGATATAAAGAGTAATAGAATGAGGATAGCTCAGTGAGGAAATTCAGTGGAGAAAAGAGGCTGAAATAGGATAGCTCAGTGAGGAAATTCAGTGGAGAAAAGAGGCTGAATAATTCAGCCAGAAGGTAAGGGAAAGAACGACATGGTGAGACCAAGTTTCGGTGAACAAGGCCCGCACTTTATTTTCCAAAGTAGTTTTTATACCTTAAGTTATGCATAGAGGATAATGGGGGAAGGGGTAGAGTCAGGCAGCAAGCCAGGCTTTCTTCCTGCAAACTTATCATATGCAAAAGCTTAG…	intronic	gene-FHIT
22	41053557	41053557	C	CCAGTCCTGCCGGGGACCAGCCCCGGCTGATCCAGGGTATTCGAAGGAGAGACGGCATAGGCGAGGATCAGGATACGATAGCTTCAATTAGGTATTAATTAAAGATATAAAGAGTAATAGAATAAGGATAGCTCAGTAGGAAAATTCAGTGGAGAAAAGAGGCTGAGTAGCTTGGTTTACGCGGGAGACCAATAAAACTTCAAGACAAGAAGTTTGCACCACTTACGTAGGCCGCAGGCGTCCTTCCGTTCTCCCGAAGGAGAGGAGACACTGAGGCCTCCCCGGTCGGATCTTAGAAGCCCAGGCATAATTAGTAAGCATGGTGGGTTCCGCGCTCCAGATGGAGACTCAACCAGAGTGAGAGAGAGAGCGACATGGGGAGACCAGTATTTCGAGAAA…	intronic	gene-FHIT
22	41563301	41563301	T	TAGCTTTTTGCCGGGGACCAGCCCCAGCTGATCCAGGGTACTCGAAGGAGAGACGGCGTCGGCGAGGGTCAGGATACGATAGTTTCAATTAGATATTAATTAGAGATATAAAGAGTAATAGAATAAGGATAGCTCAGTAGGAAAATTCAGTGGAGAAAAGAGGCTGAGTAGCTTGGTTTACGCGGGGGACCAATAAAACTTCAAGACAAGAAGCTTGAACCACTTACGTAGGCCGCAGGCGTCCTTCCGTTCTCCCGAAGGAGAGGAGACACTGAGGCCTCCCCGGTCGGATCTTAGAAGCCCAGGCAAAATTAGTAAGCTTGGTGGGTTCCGCGCTCCAGATGGAGACTCAGCCAGAGGGAGAGAGAGACATGGGGAGACCAGTATTTTGAGAAACTG…	intronic	gene-FHIT
22	57160524	57160576	TGCTACAAGCAGCCCTCTAGCCCCACTACAAAAGGAGGACCTAGTGTTATGAC	T	intronic	gene-RBSN
22	58371960	58373299	CCCTCCCTGTTGGGGGCCAGAGTGAGGTACTCTGCGAAGGTCATGAGGAAGGAGGCTCGACATACGCAAAGGCGGGATCGAGCCTCAGGAGTCCCCCTGGAAATCCTCGAGCATCTACCCCCATAACCAGAGCCTGCCTACTTTACTACTTTGTGCTCTCACCTACACTTCTGACTTTACGGGGGGCTGTCCCCCACCACCTCTTTCGGAGAAGGAGTTAACCTAGAGCTCCAGTCAATAAAAACTCCTGGGCGTGACAAGAGTGTTTTAACCTACAAACTCCTCTGAAGGTTCTCTAGCCTGCCTGACAGGCTCGTCCGGCCACATGTGATTGCTCACAGCCTCCCAACCGTGAGAGGCACGAGATGCTTTAAACCCTCTAAAAACAGGTTCTTTAGA…	C	intronic	gene-FBLN2
23	161519	161519	C	CCCTGATTGTGGGGAGCGAGCTCCGCCTCTGGCAAAGGTCATGAGGAAGGAAGCTTGGCATACGCAAAGGCGGGATCAAGCCTCAGGAGTCTCCCTGGAAATTCTCGAGCAATCTACCCCCAAAACCAGAGTCTGCCTACTTTCTGCTTTGTGCTTTCACCTACACCTCTGACTTTACGGGGGGCTGTCCCCCACTACCTCTCTGAAAAAAGTTAGCTTACAGCTCCAGTTAATAATTCCTGGGTGTGACAGTGTTTAACCTACAAACGCCTTTGGAAATCCTCTAGCCTGCCTGAATAGGTTTTTCCGGCCACATGTGATTGTTCAGAGCCTCCCAACTGTGAGAGGCAGGAGATGTTCTAAACTGTCTAAACACAGATTCTTTTGAGTAGTTAAAAG…	intergenic	gene-LOC112443721(dist=116451),gene-KHDRBS2(dist=106674)
23	485666	486761	TATGAGCTGCGGGGAGCGAGCGCCTCTGGCAAAGGTCATGAGGAAGGAGGCTTGGCATACGCAAAGGCGGGATCAAGCCTCAGGAGTCTCCCTGGAAATTCTCGAGCAATCTACCCCCAAAGCCAGAGTCTGCCTACTTTCTGCTTTGTGCTTTCACCTACACCTCTGACTTTACGGGGGGCTGTCCCCCACGACCTCTCTGAAAAAAGAGTTAGCTTACAGCTCCAGTTAATAATTCCTGGGTGTGACAGTGTTTAACCTACAAACTCCTTTGGAAATCCTCTAGCCTGCCTGAATAGGTTTTTCCGGCCACATGTGATTGTTCAGAGCCTCCCAACTGTGAGAGGCAGGAGATGTTCTAAACAGTCTAAACACAGATTCTTTTGAGTAGTTAAAAGA…	T	intronic	gene-KHDRBS2
23	2271892	2273184	TTGTTGGGGGCCAGAGTGAGGTACTCCGCCCATGGCAAAGGTCATGAGGAAGGAGGCTCGACATACGCAAAGGCGGGATCGAGCCTCAGGAGTCCCCCTGGAAATCCTCGAGCGTCTACCCCCATAACCAGAGCCTGCCTACTTTACTACTTTGTGCTCTTACCTACACCTCTGACTTTACGGGGGGCTGTCCCCCACCACCTCTTTCGGAGAAGGAGTTAACCTAGAGCTCCAGTCAATAAAAACTCTTGGGCGTGACAAGAGTGTTTTAACCTACAAACTCCTCTGAAGGTTCTCTAGCCTGCCTGACAGGCTCGTCCGGCCACATGTGATTGCTCACAGCCTCCCAACCGTGAGAGGCACGAGATGCTTTAAACCTTCTAAAAACAGGTTCCTTAG…	T	intergenic	gene-KHDRBS2(dist=1310666),gene-PRIM2(dist=287360)
23	2501834	2503126	TAGTACATTGCTGAGGACCAGCCCCGGCTGATCCAGGGTACTCGAAGAAGAGACGGCGTCGGCGAGGGTCAGGATACGATAGCTTCAATTAGATATTAATTAGAGATATAAAGAGTAATAGAATAAGGATAGCTCAGTAGGAAAATTCAGTGGAGAAAAGAGGCTGAGTAGCTTGGTTTACGCGGGGGACCAATAAAACTTCAAGACAAGAAGCTTGCACCACTTACGTAGGCCGCAGGCGTCCTTCCGTTCTCCCGAAGGAGAGGAGACACTGAGGCCTCCCCGGTCGGATCTTAGAAGCCCAGGCAAAATTAGTAAGCTTGGTGGGTTCCGCGCTCCAGATGGAGACTCAGCCAGAGGGAGAGAGAGACATGGGGAGACCAGTATTTCGAGAAACTG…	T	intergenic	gene-KHDRBS2(dist=1540608),gene-PRIM2(dist=57418)
23	3841872	3843151	GGGAGAATGTTGGGGGCCAGAGTGAGGTACTCCGCCCATGGCAAAGGTCATGAGGAAGGAGGCTCGACATACGCAAAGGCGGGATCGAGCCTCAGGAGTCCCCCTGGAACTCCTCGAGCATCTACCCCCATAACCAGAGCCTGCCTACTTTACTACTTTGTGCTCTCACCTACACCTTTGACTTTACGGGGGGCTGTCCCCCACCACCTCTTTCGGAGAAGAGCTCCAGTCAATAAAAACTCTTGGGCGTGACAAGAGTGTTTTAACCTACAAACTCCTCTGAAGGTTCTCTAGCCTGCCTGACAGGCTCGTCCAGCCACATGTGATTGCTCACAGCCTCCCAACCGTGAGAGGCACGAGATGCTTTAAACCTTCTAAAAACAGATTCCTTAGAAAAGT…	G	intergenic	gene-DST(dist=73827),gene-COL21A1(dist=183031)
23	4184387	4185605	GTAAGGTTGCCGGGGACCAGCCCCGGCTGATCCAGGGTATTCGAAGGAGAGACGGCGTAGGCGAAGATCAGGAAACAACTGCTTAATTAAATGTTAATTAAGGATATAAAGAGTAATAGAATGACGATAGCTCAGTAAAATTCAGTGAAGAAAAGAGGCTGAAATAAGGATAGCTCAGTGAGGAAATTCAGTGGAGAAAAGAGGCTGAATAATTCAGCCAGAAGGTAAGAGAAAGAACGACATGGTGAGACCAAGTTTCGGTGAACAAGGCCCGCACTTTATTTTCCAAAGCAGTTTTTATACCTTAAGTTATGCATAGAGGATAATGGGGGAAGGAGTAGAGTCATGCAGCAAGCCAGGCTTTCTTCCTGCAAACTTATCATATGCAAAAGCTTAGGT…	G	intronic	gene-COL21A1
23	5385900	5386312	TGCCGGGAGCCGGTGAGGCATTCCACTCGTGACAAAGGTCATGAGGAAAGAGGCTCGGCATACGCAAAGGCGGGATCGAGCCTCAGGAGTCCGCCCGGATATTCTCGAGCATTTTCCCCCCAAAAAACCAGAGTCTGCCTACTTTATTGCTTTGTGCTCTCACCTCTGACTTTACTGGGGGCTGTCCCCTACCACCATCTCGCTCTCTCTCTGTCAAAGAGTTAACTTACAGCTCCAATTAATAAAGTTCCTGGGCAATTAGGAGTGTTTAAATCCAAACCCCTCAGATGGCTCTCTAACTCGCCTGACAAGTTTACCCGGACTCCTGCAGCTATGCATACGATTGTTTACAGTCTCCTAGCCTCCAGAGGCACGGGAAGCTTAAGATATTCAAATAGC…	T	intergenic	gene-TRNAG-CCC-146(dist=46858),gene-FAM83B(dist=70212)
23	5386323	5387205	ACTGTCAGAATAAACTAGTAAAGGATTTCATTGGTGAGTCAATGCTTGTTGCCAAGTTTTCACATCCCCTGAATTGTATCCTTGAATGTGTATTAATTAATAGTTGGTATATAGAAAAAAATAAGTAGTGGCCTTGGTGTTAGTAACTTTAGACCCTTAAGGTAATAAATTCTTTCCTTTGTTGTAAACCCATTACACATCCGCCCTATAGGAATGCAATTTTATATTTGGAAGATGGTGCCAAACCTTAAAATAATTACTCTTAGAGAAAATAAGTCTTTGTTGATAAGTCCTTGTCAAGAGTCATAAAATGTTAGTAGGCCTTCTGGCCAGAAGATGATGTAAATCACCTAAACCATTTGTATACGATAAATTTGCAGGAAAGAAACCTTGGTTTTT…	A	intergenic	gene-TRNAG-CCC-146(dist=47281),gene-FAM83B(dist=69319)
23	12853133	12862011	TAGCCTTTTGCCGGGAGCCGGCATATTGCATATTGAGTGCATATTGCATATTGAGTGCAGCACTTTTCAGGATCTGGAATAGCTCAACTGGAAATTCTATCACTGCCGGTAGCCAGCGTGAGGAACTCCGCCCATGACAAAGGTCATGAGGAAGGAGGCTCGGCATACGCAAAGGCGGGATCGAGCTTCAGGAGTCCCCCTGGAAATTCTCGAGCATATACCCCCAAAACCAGAGTCTGCCTACTTTCTGCTTTGTGCTTTCACCTACACCTCTGACTTTACGGGGGGCTGTCCCCCACTACCTCTCTGAAAAAAGTTAGCTTACAGCTCCAGTTAATAATTCCTGGGTGTGACAGTGTTTAACCTACAAACTCCTTTGGAAATCCTCTAGCCTGCCTG…	T	intronic	gene-DNAH8
23	21400365	21400367	TTG	TCTTGAAAATTTGCGGGGAGCTGGTGAGGCATTCCACTCATGACAAAGGTCATGAGGAAGGAGGCTCGGCATACGCAAAGGCGGGATCGAGCCTCAGGAGTCCCCCCGGATATTCTCGAGCATTTTCCCCCAAAAAACCAGAGTCTGCCTACTTTATTGCTTTGTGCTCTCACCTCTGACTTTACTGGGGGCTGTCCCCTACCACCATCTCTCTCTCTCTCTGTCAAAGAGTTAACTTACAGCTCCAATTAATAAAGTTCCTGGGCAATTAGGAGTGTTTAAATCCAAACCCCTCAGATGGCTCTCTAACTCGCCTGACAAGTTTACCCGGACTCCTGCAGCTATGCATACGATTGTTTACAGTCTCCTAGCCTCCAGAGGCACGGGAAGCTTAAGATA…	intergenic	gene-PTCHD4(dist=305047),gene-OR9G1(dist=209061)
23	21594522	21594522	T	TGAGGGATGCGGGGAGCCGGTGAGGCATTCCACTCATGACAAAGGTCATGAGGAAGGAGGCTCGGCATACGCAAAGGTGGGATCGAGCCTCAGGAGTCCCCCCGGATATTCTCGAGCATTTTCCCCCAAAAAACCAGAGTCTGCCTACTTTATTGCTTTGTGCTCTCACCTCTGACTTTACTGCGGGCTGTCCCCTACCACCATCTCTCTCTCTGTGTGTCAAAGAGTTAACTTACAGCTCCAATTAATAAAGTTCCTGGGCAATTAGGAGTGTTTAAATCCAAACCCCTCTGATGGCTCTCTAACTCGCCTGACAAGTTTACCCGGACTCCTGCAGCTATGCATACGATTGTTTACAGTCTCCCAGCCTCGAGAGGCATGGGAAGCTTAAGATATTCA…	intergenic	gene-PTCHD4(dist=499204),gene-OR9G1(dist=14906)
23	25769076	25769076	C	CCATGGGTGCCGGAGCCAGCCGGCAAAGTTGATCAGGTCCCGAGAACGTGCACGGCGGGGCTAAGAAAGAAACTAAAGCAAGAGACTACAAAGATGGGGTCGAGAGGTTCAGACACGTCACCACGAAGGGACGCAGTCTGACACCAACTTTATTCAACATCTCATATTTATACAGAAAAGCGTGAGAAAGACAAGACAGTTGACATTTTTTCTTGGTTGGCCTATACATCTTACAAACAGTCACAAGAAATCTTGAGAGCATGGGAATGGCTCCCTGTTATTATTTCTTACACCAGATAACATTTCTCTGTGCGTGAGAAGTTTGCACAGAACTCCAGGTGCCTGCAGTAAATAAGCGCCTAATCTCTGGGGTGGCGGGACAGAGAGCTATGTTTGCAA…	intergenic	gene-BOLA-DRB3(dist=34257),gene-BOLA-DRB2(dist=26851)
23	26931024	26932320	AGAGAAATGCTGAGGACCAGCCCCAGCTGATCCAGGGTATTCGAAGGAGAGACGGCCTAGGCGACTATTTATATGCTAATTAGAGATATAAAGAATAATAGAATGAGGATAGCTCAGTAGGAAAATTCAGTGGAGAAAAGAGGCTGAGTAGCTTGGTTTACGCGGGAGACCAATGAAACTTCAAGACAAGAAGTTTGCACCACTTACGTAGGCCGCAGGCGCCCTCTCAAATAGCGGAAGGTGCCTCACCCTAGACACCTTCTCGAGTGGGTCTTAGAAGCCCAGGCATAATTAGTAAGCGTGGTGGGTTCCGTGCTACAGATGGAGACTCAGCTGGAAGTTAAAGGGAAGAATGACATGGGGAGACCAAGCGTTGGTCAGCAAGGCCCGTAGCTTTAT…	ATT	intronic	gene-C23H6orf10
23	26931447	26931523	AAGTTACACATAGAGGATAATAGGGGATGCAAAGTCAGCAGTCTTTGATTCTTACCAAAAACCAGGGTTTCTTTCCT	A	intronic	gene-C23H6orf10
23	27804503	27808848	TCCCATTTGCCGGAGCCAGCCAGCAAAGTCGATCAGGTCCCGAGAATGTGCACGGCGGGGCTAAGAAAGAAACTAAAGCAAGAGACTACAAAGATGGGGTCGAGAGGTTCAGACACGTCACCACGAAGGGACGCAGTCTGACACCAACTTTATTCAACATCTCATATTTATACAGAAAAGCGTGAGAGAGACGAAACAGTTGACATTTTTTCTTGGTTAGCCTATACATCTTACAAACAGTCACAAGAAGTCTTGAGAGCATGGGAATGGCTCCCTGTTATTATTTCTTACACCAGATAACATTTCTCTGTGCGTGAGAAGTTTGCACAGAACTCCAGGTGCCTGCAGTAAATAAGCGCCTAATCTCTGGGGTGGCGGGACAGAGAGCTATGTTTGCAA…	T	intergenic	gene-MGC126945(dist=18177),gene-BoLA(dist=20867)
23	28589245	28590546	CGAGAACTGTTGGGGGCCAGCATGAGGCACTCCGCCCATGGCAAAGGTCATGAAGAAGGAGGCTCGACATACGCAAAGGCGGGATTGAGCCTCAGGAGTCCGCCTGGAAATCCTCGAGCATCTACCCCCATAACCCAGAGCCTGCCTACTTTACTATGTGCTCTCACCTACACCTCTGACTTTATGGGGGGCTGTCCCCAACCACCTCTTTCAGAGAAGGAGTTAACCTAGAGCTCCAGTTAATAAAAACTCCTGGGCATGACAAGAGTGTTTTAACCTACAAACTCCTCTGAAGGTTCTCTAGCCTGCCTGACAGGCTTGTCCGGCCACATGTGATTGCTTACAGCCTCCCAACTGTGAGAGGCACGAAATGCTTTAAACCTTCTAAAAACAGGTTCC…	CA	intergenic	gene-BOLA-NC1(dist=36859),gene-JSP.1(dist=22314)
23	29043562	29044695	TAGGGAGTGCTTGGAGCAGGAGCTCCGCCCATGACAAAGGTCATGAGGAAGGAGGCTCTGGATAGGCAAAGGCAGGATTGAGCCTCAGGAGTCTCCCTGGAAATTCTCGAGCATCTACCCCCAAAACCAGAGTCTGCCTACTTTATGCTTTGTGCTCTCACCTACACCTCTGACTTTACCGGGGGCTGTCCCCCACTACCTCTGTCTGAAAAAAAGAGTTAACTTACAGCTCCAGTTAATAAAATTCCTGGGTGTGATAGTGTTTCAACCTACAAACTCCTTTGGAAGTCCTCTAGCCTGCCTGAATAGGTTTTTCCGGCCACATGTGATTGCTCAGAGCCTCCCAGCTGTCAGAGGCATGAGATGTTCTAAACTGTCTAAATACAGGTTCCTTTGAGC…	T	intronic	gene-LOC786987
23	29277768	29277768	T	TTTATACTGCGGGGAGCGAGCTCCGCCTCTGGCAAAGGTCATGAGGAAGGAGGCTTGGCATATGCAAAGGCGGGATCAAGCCTCAGCAGTCTCCCTGGAAATTCTCGAGCAATCTACCCCCAAAACCAGAGTCTGCCTACTTTCTGCTTTGTGCTTTCACCTACACCTCTGACTTTACGCGGGGCTGTCCCCCACTACCTCTCTCTGAAAAAAGAGTTAGCTTACAGCTCCAGTTAATAATTCTTGGGTGTGACAGTGTTTCAACCTACAAACTCTTTTGGAAGTCCTCTAGCCTGCCTGAATAGGTTTTTTCCGGCAACATGTGATTGTTCAGAGCCTCCCAACTGTGAGAGGCAGGAGATGTTCTAAACTGTCTAAACACAGATTCCTTTGAGTAGT…	UTR3	gene-LOC785712
23	29415061	29416332	GTGCCGGGGTCCTGCCCCGGCTGATCCAGGGTATTCGAAGCGGGGACGGCGTCGGCGACCTATTTATTTAAGTATTTTATCAAAGATATAAAGAGTAATAGGATGAGGATAGCTCAGTAGGAAAATTCAGTGGAGAAAAGAGGCTGAGTAGCTTGGTTTACGCGGGAGACCAATAAAACTTCAAGACAAGAAGTTTGCACCACTTACGTAGGCCGCAGGCGTCCTTCCGTTCTCCCGAAGGAGAGGAGACACTGAGGCCTCCCCGGTCGGATCTTAGAAGCCCAGGCATAATTAGTAAGCATGGTGGGTTCCGCGCTCCAGATGGAGACTCAACCAGAGTGAGAGAGAGAGCGACATGGGGAGACCAGTATTTCGAGAAACTGATCCCAATTCTTTATT…	G	upstream	gene-LOC510530
23	30912926	30914025	GTATATGTGCCGGGGACCAGCCCCGGCTGAACCAGGGTATTCGAAGGAGAGACGGCGTAGGCGAAGATCAGGAAACAATTGCTTAATTAAATGTTAATTAAGGATATAAAGAGTAATAGAATGAGGATAGCTCAGTAGGAAAATTCAGTGAAGAAAAGAGGCTGAAATAAGGATAGCTCAGTGAGGAAATTCAGTGGAGAAAAGAGGCTGAATAATTCAGCCAGAAGGTAAGAGAAAGAACGACATGGTGAGACCAAGTTTCGGTGAACAAGGCCCACACTTTATTTTCCAAAGTAGTTTTTATACCTTAAGTTATGCATAGAGGATAATGGGGGAAGGGGTAGAGTCATGCAGTAAGCCAGGCTTTCTTCCTGCAAACTTATCATATGCAAAAGTTTA…	G	intergenic	gene-LOC522315(dist=30488),gene-LOC783041(dist=6709)
23	31443790	31445088	CGTGTCCTGTTGGGGGCCAGAGTGAGGTACTCCGCCCATGGCAAAGGTCATGAGGAAGGAGGCTCGACATACGCAAAGGCGGGATCGAGCCTCAGGAGTCCCCCTGGAAATCCTCGAGCGTCTACCCCCATAACCAGAGCCTGCCTACTTTACTACTTTGTGCTCTTACCTACACCTCTGACTTTACGGGGGGCTGTCCCCCACCACCTCTTTCAGAGAAGGAGTTAACCTAGAGCTCCAGTCAATAAAAACTCTTGGGTGTGACAAGAGTGTTTTAACCTACAAACTCCTCTGAAGGTTCTCTAGCCTGCCTGACAGGCTCGTCCGGCCACATGTGATTGCTCACAGCCTCCCAACCGTGAGAGGCACGAGATGCTTTAAACCTTCTAAAAACAGGTT…	C	intergenic	gene-TRNAA-AGC-26(dist=2465),gene-ZNF322(dist=3608)
23	32074315	32074315	G	GGAAGATTGCTGGGGTCCAGCCCTGATGGATCCAGGGAATTCGAAGCGGGGACGGCATCGGCGAGGATCAGGAAACAACTGCTTAATTAAACTTTAATTAAGGATATAAAGAGTAATAGAATAAGGATAGCTCAGTGAGGAAATTCAGTGGAGAAAAGAGGCTGAATAATTCAGCCAGAAGGTGAGAGAAAGAACGACATGGGGAGACCAAGTTTCGGTGAACAAGGCCCGCACTTTATTTTCCAAAGTAGTTTTTATACCTTAAGTTATGCATAGAGGATAATGGGGGAAGAGGTAGAGTCATGCAGTAAGCCAGGCTTTCTTCCTGCAAACTTATCATACGCAAAAGTTTAGGTGATTTGCATCATCTTCTGGCCCGGAGGCCTTTTTCTCTAAAGG…	intronic	gene-SLC17A1
23	32631034	32631622	GCCGGGGACCAGCCCCGGCTGATCCAGGGTATTCGAAGGAGAGACGGCGTAGGCGAAGATCAGGCGACAATTGCTTAATTAAATGTTAATTAAGGATATAAAGAGTAATAGAATGAGGATAGCTCAGTAAAATTCAGTGAAGAAAAGAGGCTGAAATAAGGATAGCTCAGTGAGGAAATTCAGTGGAGAAAAGAGGCTGAAATAAGGATAGCTCAGTGAGGAAATTCAGTGGAGAAAAGAGGCTGAATAATTCAGCCAGAAGGTAAGAGAAAGAATGACATGGTGAGACCAAGTTTCGGTAAACAAGGCCCGCACTTTGTTTTCCAAAGTAGTTTTTATACCTTAAGTTATGCATAGAGGATAATGGGGGAAGGGGTAGAGTCAGGCAGCAAGCCAGGC…	G	intronic	gene-LOC537017
23	32631639	32632175	TAACTCAAGGGTCCCAGGTTACAAACATTAAAGCTACTACTTACACCAATTACATTAATCAATACACTGCCAGGGACACAGCAGGTAAGGGATATGGAAACTTAGCAGCAAACATTGGCCCAACAAGTGAAAATCCCTTCACCAATACAATTTCTAATCAATCTTTTAACTATTCAAAAGAATCTGTGTTTACACAGTTTAGAACATCTCCTGCCTCTCACAGTTGGGAGGCTCTGAACAATCACATGTGGCCGGAAAAACCTATTCAGGCAGGCTAAAGGATTTCCAAAGGAGTTTGTAGGTTAAACACTGTCACACCCAGGAATTATTAACTGGAGCTGTAAGCTAACTCTTTTTTCAGAGAGGTAGTGGGGGACAGCCCCCCGTAAAGTCAGACGT…	T	intronic	gene-LOC537017
23	37836397	37836397	C	CATTTCATGCCGGGAGCCGGCATATTGCATATTGAGTGCATATTGCATATTGAGTGCAGCACTTTTCAGGATCTGGAATAGCTCAACTGGAAATTCTATCACTGCCGGTAGCCAGCGTGAGGAACTCCGCCCATGACAAAGGTCATGAGGAAGGAGGCTCGGCATACGCAAAGGCGGGATCGAGCTTCAGGAGTCCCCCTGGAAATTCTCGAGCAATCTACCCCCAAAACCAGAGTCTGCCTACTTTCTGCTTTGTGCTTTCACCTACACCTCTGACTTTACGGGGGGCTGTCCCCCACTACCTCTCTGAAAAAAGAGTTAGCTTACAGCTCCAGTTAATAATTCCTGGGTGTGACAGTGTTTAACCTACAAACTCCTTTAGAAATCCTCTAGCCTGCC…	intergenic	gene-MBOAT1(dist=2293),gene-ID4(dist=262139)
23	48385288	48385288	C	CAACACATGCCAGAGGCGGAGCTCACTCCCCGCATCGATAAGTTTGCAGGAAGAAAGCCTGGCTTACTGCA	intergenic	gene-RREB1(dist=170011),gene-LY86(dist=143347)
23	48933326	48934626	GGTCTGGTGCCGGGGACCAGCCCCGGCTGATCCAGGGTATTCGAAGGAGAGACGGCATAGGCGAGGATCAGGATACGATAGCTTCAATTAGGTATTAATTAAAGATATAAAGAGTAATAGAATAAGGATAGCTCAGTAGGAAAATTCAGTGGAGAAAAGAGGCTGAGTAGCTTGGTTTACGCGGGAGACCAATAAAACTTCAAGACAAGAAGTTTGCACCACTTACGTAGGCCGCAGGCGTCCTTCCGTTCTCCCGAAGGAGAGGAGACACTGAGGCCTCCCCGGTCGGATCTTAGAAGCCCAGGCATAATTAGTAAGCATGGTGGGTTCCGCACTCCAGATGGAGACTCAACCAGAGTGAGAGAGAGCGACATGGGGAGACCAGTATTTCGAGAAACT…	G	intergenic	gene-F13A1(dist=19472),gene-NRN1(dist=51404)
24	4492607	4492607	C	CGGGTGTTGCCGGGGACCAGCCCCGGCTGATCCAGGGAATTCGAAGTGGGGACGTTGTCAGCGAAGATCAGGAAACAATTGCTTAATTAAACGTTAATTAAGGATATAAAGAGTAATAGAATGAGGATAGCTCAGTAGGAAAATTCAGTGGAGAAGAGAGGCTGAAATAAGGATAGCTCAGTGAGGAAATTCAGTGTAGAAAAGAGGCTGAATAATTCAGCCAGAAGGTAAGAGAAAGAACGACATGGTGAGACCAAGTTTCGGTGAACAAGGCCCGCACTTTATTTTCCAAAGTAGTTTTTATACCTTAAGTTATGCATAGAGGATAATGGGGGAAGGGGTAGAGTCATGCAGTAAGCCAGGCTTTCTTCCTGCAAACATATCATATGCAAAAGTTTA…	intergenic	gene-FBXO15(dist=210735),gene-TRNAA-CGC-9(dist=186009)
24	14068031	14069331	CCTTCTTTGCCGGGGACCAGCCCCGGCTGATCCAGGGTATTCGAAGGAGAGACAGCATAGGCGAGGATCAGGATACAATAGCTTCAATTAGATATTAATTAAAGATATAAAGAGTAATAGAATAAGGATAGCTCAGTAGGAAAATTCAGTGGAGAAAAGAGGCTGAGTGGCTTGGTTTACGCGGGAGACCAATAAAACTTCAAGACAAGAAGTTTGCACCACTTACGTAGGCCGCAGGCGTCCTTCCGTTCTCCCGAAGGAGAGGAGACACTGAGGCCTCCCCGGTCGGATCTTAGAAGCCCAGGCAAAATTAGTAAGCTTGGTGGGTTCCGCGCTCCAGATGGAGACTCAGCCAGAGGGAGAGAGAGACATGGGGAGACCAGTATTTTGAGAAACTGA…	C	intergenic	gene-PIK3C3(dist=25647),gene-LOC112444152(dist=250545)
24	16278335	16278657	ACTGACCTTTTCCAGTCCCGTGGACACTGCTGTGTTTTCCAAATTTCCTGGCATATTGAGTGCCTCACTTTCACAGAATCATCTTTTGGGACTTGTAATAACTCAGCTGGAATTCCATTACCTCCACTAGCTTTGCTCAAAGTGATGTTTCCTAAGTCTCACTTGATTTAACACTCCAGGATGTCTGGCTCTTGATGAGTGATCACACCATCATGATTATCTGGATCATTATGATCTCCTTTTTACTGTTCTTCTGTATATTCTTGTCACATCTTCTTAATATCTTCTGCTTCAGATATAATGATATAATGGTCATTTGAATT	AA	intergenic	gene-TRNAC-GCA-233(dist=1491565),gene-TRNAK-UUU-44(dist=1024359)
24	28968579	28968579	T	TGTTACTTGCCGGGGACCAGCCCCGGCTGATCCAGGGAATTCGAAGCGGGGACGGCGTCGGCGAAGATCAGGAAACAATTGCTTAATTAAACGTTAATTAAGGATATAAAGAGTAATAGAATGAGGATAGCTCAGTAGGAAAATTCAGTGGAGAAGAGAGGCTGAAATAAGGATAGCTCAGTGAGGAAATTCAGTGTAGAAAAGAGGCTGAATAATTCAGCCAGAAGGTAAGAGAAAGAACGACATGGTGAGACCAAGTTTCGGTGAACAAGGCCCGCACTTTATTTTCCAAAGTAGTTTTTATACCTTAAGTTATGCATAGAGGATAATGGGGGAAGGGGTAGAGTCATGCAGCAAGCCAGGCTTTCTTCCTGCAAACTTATCATATGCAAAAGTTTA…	intergenic	gene-CDH2(dist=64464),gene-CHST9(dist=720244)
24	37878951	37878952	AA	AGACCAGAAGCTGCCGGGAGCCGGCATATTGCATATTGAGTGCATATTGCATATTGAGTGCAGCACTTTTCAGGATCTGGAATAGCTCAACTGGAAATTCTATCACTGCCGGTAGCCAGCGTGAGGAACTCCGCCCATGACAAAGGTCATGAGGAAGGAGGCTCGGCATACGCAAAGGCGGGATCGAGCTTCAGGAGTCCCCCTGGAAATTCTCGAGCATATACCCCCAAAACCAGAGTCTGCCTACTTTCTGCTTTGTGCTTTCACCTACACCTCTGACTTTACGGGGGGCTGTCCCCCACTACCTCTCTGAAAAAAGTTAGCTTACAGCTCCAGTTAATAATTCCTGGGTGTGACAGTGTTTAACCTACAAACTCCTTTGGAAATCCTCTAGCCTGC…	intergenic	gene-DLGAP1(dist=2455),gene-AKAIN1(dist=866710)
24	38712205	38713436	TGTTTTTGATGCCGGGAGCCGGCATATTGCATATTGAGTGCATATTGCATATTGAGTGCAGCACTTTTCAGGATCTGGAATAGCTCAACCGGAATTCTATCACTGCCGGTAGCCAGCGTGAGGAACTCCACCCATGACAAAGGTCATGAGGAAGGAGGCTTGGCATACGCAAAGGCGGGATCAAGCCTCAGGAGTCTCCCTGGAAATTCTCGAGCAATCTACCCCCAAAACCAGAGTCTGCCTACTTTCTGCTTTGTGCTTTCACCTACACCTCTGACTTTACGGGGGGCTGTCCCCCACTACCTCTCTGAAAAAAGAGTTAGCTTACAGCTCCAGTTAATAATTCCTGGGTGTGACAGTGTTTAACCTACAAACTCCTTTGGAAATCGTCTAGCCTGC…	T	intergenic	gene-DLGAP1(dist=835709),gene-AKAIN1(dist=32226)
24	38762192	38762192	C	CAGAAAAGAGTTTTCCGGCCTTGTTCACCGAAACTTGGTCTCACCATGTCGTTCTTTCTCTTACCTTCTGGCTGAATTATTCAGCCTCTTTTCTCCACTGAATTTCCTCACTGAGCTATCCTCATTCTATTACTCTTTATATCCTTAATTAACATTTAATTAAGCAGTGGTTTCCTGATCTTCGCCTACGCCGTCTCTCCTTCGAATACCCTGGATCAGCCGGGGCTGGTCCCCGGCACCCTACCATGGCTCGAGAGCAATGAGGCGCTCGCCCTCGCCACTCGCATGGAGACCCGACTTCCCTGGCGCCCCACGAGAGGCTCACTGACCTCGCCGTCGTACCTCGTGAGAAAGCGCACACTGGGGCCGCCGCTCGAGAACAACCCCAAGACTCCCCCG…	intronic	gene-AKAIN1
24	43445354	43446575	CTGTACTTGCCGGGAGCCGGCATATTGCATATTGAGTGCATATTGCATATTGAGTGCAGCACTTTTCAGGATCTGGAATAGCTCAACTGGAATTCTATCACTGCCGGTAGCCAGCGTGAGGAACTCCGCCCATGACAAAGGTCATGAGGAAGGAGGCTTGGCATACGCAAAGGCGGGATCAAGCCTCAGGAGTCTCCCTGGAAATTCTCGAGCAATCTACCCCCAAAACCAGAGTCTGCCTACTTTCTGCTTTGTGCTTTCACCTACACCTCAGACTTTACGGGGGGCTGTCCCCCACTACCTCTCTGAAAAAAGTTAGCTTACAGCTCCAGTTAATAATTCCTGGGTGTGACAGTGTTTAACCTACAAACTCCTTTGGAAATCCTCTAGCCTGCCTGA…	C	intronic	gene-LDLRAD4
24	43445643	43445703	GTCCCCCACTACCTCTCTGAAAAAAGTTAGCTTACAGCTCCAGTTAATAATTCCTGGGTGT	G	intronic	gene-LDLRAD4
24	43446014	43446114	GTTAATTCTTTTTGTAGCCCACCACACCTTTGCGCTGTACGAATGCAACTTTATCTAATGCTTTTGGAGGGTGGCTCCTGACCAATCACCTTTAGAGAAAA	GG	intronic	gene-LDLRAD4
24	46882156	46883443	GACAGGAAGTTGCCGGGGACCAGCCCCGGCTGATCCAGGGTATTCGAAGGAGAGACGGCATAGGCGAGGATCAGGATACAATAGCTTCAATTAGATATTAATTAAAGATATAAAGAGTAATAGAATAAGGATAGCTCAGTAGGAAAATTCAGTGGAGAAAAGAGGCTGAGTAGCTTGGTTTACGCGGGAGACCAATAAAACTTCAAGACAAGAAGTTTGCACCACTTACGTAGGCCGCAGGCGTCCTTCCGTTCTCCCGAAGGAGAGGAGACACTGAGGCCTCCCCGGTCGGATCTTAGAAGCCCAGGCATAATTAGTAAGCATGGTGGGTTCCGCGCTCCAGATGGAGACTCAACCAGAGTGAGAGAGAGAGCGACATGGGGAGACCAGTATTTCGAG…	G	intergenic	gene-IER3IP1(dist=10297),gene-SKOR2(dist=19516)
24	46882517	46882568	TGAGAGAGAGAGCGACATGGGGAGACCAGTATTTCGAGAAACTGATCCCAAT	TC	intergenic	gene-IER3IP1(dist=10658),gene-SKOR2(dist=20391)
24	46882831	46882888	CCTACAGGGTGAGGGTGTAGTGGGTTTTAGTTAAGGAAAGAATTTACTTAGCCTAAGG	C	intergenic	gene-IER3IP1(dist=10972),gene-SKOR2(dist=20071)
24	50887223	50887223	T	TGTTTATTGTTGGGGGCCAGAGTGAGGTACTCCGCCCATGGCAAAGGTCATGAGGAAGGAGGCTCGACATACGCAAAGGCGGGATCGAGCCTCAGGAGTCCCCCTGGAAATCCTCGAGCATCTACCCCCATAACCAGAGCCTGCCTACTTTACTACTTTGTGCTCACCTACACCTCTGACTTTATGGGGGGCTGTCCCCAACCACCTCTTTTGGAGAAGGAGTTAACTTAGAGCTCCAGTTTATAATAATTCCTGGGCGTGATAAGAGTGTTTTAACCTACAAACTCCTCTGAAGGTTCTCTGGCCTGCCTGACAGGCTTGTCCGGCCACATGTGATCGCTCACAGCCTCCCAACCGTGAGAGGCACAAGATGCTTTAAACCTTCTAAAAACAGGTTCC…	intergenic	gene-MEX3C(dist=219474),gene-LOC112444158(dist=1313764)
24	59821997	59821997	C	CCTTTAATGCCGGGGACCTGCCCCGGCTGATCCAGGGTATTCGAAGCGGGGACGGCGTCGGCGACCTATTTATTTAAATATTTTATCAAAGATATAAAGAGTAATAGGATGAGGATAGCTCAGTAGGAAAATTCAGTGGAGAAAAGAGGCTGAGTAGCTTGGTTTACGCGGGAGACCAATAAAACTTCAAGACAAGAAGTTTGCACCACTTACGTAGGCCGCAGGCGTCCTTCCGTTCTCCCGAAGGAGAGGAGACACTGAGGCCTCCCCGGTCGGATCTTAGAAGCCCAGGCATAATTAGTAAGCATGGTGGGTTCCGCGCTCCAGATGGAGACTCAACCAGAGTGAGAGAGAGAGCGACATGGGGAGACCAGTATTTCGAGAAACTGATCCCCATTC…	intergenic	gene-LOC782054(dist=482389),gene-LOC112444177(dist=65491)
24	60506554	60506554	G	GGTGGGCTGTTGGGGGCCAGAGTGAGGTACTCCGCCCGTGACAAAGGTCATGAGGAAGGAGGCTCGACATACGCAAAGGTGGGATCGAGCCTCAGGAGTCCCCCTGGAAATCCTCAAGCATTTACCCCCATAACCAGAGCCTGCCTACTTTACTACTTTGTGCTCTCACCTACATCTCTGACTTTACAGGGGGCTGTCCCCCACCACCTCTTTCGGAGAAGGAGTTAATCTAGAGCTCCAGTTAATAATAATTCCTGGGCGTGATAAGAGTGTTTTAACCTACAAACTCCTCTGAAGGTTCTCTAGCCTGCCTGACAGGCTCATCCGGCCACATGTGATTGCTCACAGCCTCCCAACCGTGAGAGGCACAAGATGCTTTAAACCTTCTAAAAACAGGTT…	intronic	gene-PIGN
25	4479950	4480038	AGCCCAGGCATAATTAGTAAGCATGGTGGGTTCCGCGCTCCAGATGGAGACTCAACCAGAGTGAGAGAGAGAGCGACATGGGGAGACCA	ATT	intronic	gene-RBFOX1
25	7134341	7136365	TGCTTTCCTGTTGGGGGCCAGAGTGAGGTATTCAGCCCATGGCAAAGGTCATGAGGAAGGAGGCTCGACATACGCAAAGGTGGGATCGAGCCTCAGGAGTCCCCCTGGAAATCCTCGAGCGTCTACCCCCATAACCAGAGCCTGCCTACTTTACTACTTTGTGCTCTTACCTACATCTCTGACTTTACGGGGGGCTGTCCCCCACCACCTCTTTCGGAGAAGGAGTTAACCTAGAGCTCCAGTCAATAAAAACTCTTGGGTGTGACAAGAGTGTTTTAACCTACAAACTCCTCTGAAGGTTCTCTAGCCTGCCTGACAGGCTTGTCCGGCCACATGTGATTGCTCACAGCCTCCCAACCGTGAGAGGCACGAGATGCTTTAAACCTTCTAAAAACAGGT…	T	intergenic	gene-RBFOX1(dist=493985),gene-TRNAD-GUC-20(dist=290934)
25	8188063	8188065	CCT	CGATGCGGGGAGCGAGCTCCGCCTCTGGCAAAGGTCATGAGGAAGGAGGCTTGGCATACGCAAAGGCGGGATCAAGCCTCAGGAGTCTCCCTGGAAATTCTCGAGCAATCTACCCCCAAAACCAGAGTCTGCCTACTTTCTGCTTTGTGCTTTCACCTACACCTCTGACTTTATGGGGGGCTGTCCCCCACTACCTCTCTGAAAAAAGTTAGCTTACAGCTCCAGTTAATAATTCCTGGGTGTGACAGTGCTTAACCTACAAACTCCCTTGGAAATCCTCTAGCCTGCCTGAATAGGTTTTTCCGGCCACATGTGATTGTTCAGAGCCTCCCAACTGTGAGAGGCAGGAGATGTTCTAAACTGTGTAAACACAGATTCTTTTGAGTAGTTAAAAGATTG…	intergenic	gene-TRNAG-CCC-154(dist=238601),gene-TRNAG-CCC-155(dist=167195)
25	11569346	11569346	T	TCCTTGGTGTTGGGGGCCAGAGTGAGGTACTCTGCCCATGGCAAAGGTCATGAGGAAGGAGGCTCAACATACGCAAAGGCGGGATCAAGCCTCAGGAGTCCCCCTGGAAATCCTTGAGCATCTACCCCCATAACCAGAGCCTGCCTACTTTACTACTTTGTGCTCTCACCTACACCTCTGACTTTACGGGGGGGCTGTCCCCCACCACCTCTTTTGGAGAAGGAATTAACTTAGAGCTCCAGTTAATAATAATTCCTGGGTGTGATAGGAGTGTTTCAACCTACAAACTCCTCTGAAGGTTCTCTGGCCTGCCTGACAGGCTTGTCCAGCCACATGTGATTGCTCACAGTCTCCCAACCGTGAGAGGCACGAGATGCTTTAAACCTTCTAAAAACAGGT…	intergenic	gene-CPPED1(dist=37828),gene-SHISA9(dist=63899)
25	14172247	14172247	C	CGGTATGTGCCGGGAGCCGGCATATTGCATATTGAGTGCATATTGCATATTGAGTGCAGCACTTTTCAGGATCTGGAATAGCTCAACTGGAATTCTATCACTGCCGGTAGCCAGCGTGAGGAACTCCGCCCATGACAAAGGTCATGAGGAAGGAGGCTTGGCATACGCAAAGGCGGGATCAAGCCTCAGGAGTCTCCCTGGAAATTCTCGAGCAATCTACCCCCAAAACCAGTCTGCCTACTTTCTGCTTTGTGCTTTCACCTACACCTCTGACTTTACGGGGGGCTGTCCCCCACTACCTCTCTGAAAAAAGTTAGCTTACAGCTCCAGTTAATAATTCCTGGGTGTGACAGTGTTTAACCTACAAACTCCTTTGGAAATCCTCTAGCCTGCCTGAAT…	intronic	gene-MYH11
25	21317133	21317133	T	TCTGTTATGCCGGGGACCAGCCCCGGCTGATCCAGGGTATTCGAAGCGGGGACGGCGTCGGCGAGGATCAGGAAACAACTGCTTAATTAAACGTTAATTAAGGATATAAAGAGTAATAGAATGAGGATAGCTCAGTGAAGAATTCAGTGGAGAAAAGAGGCTGAATAATTCAGCCAGAAGGTAAGAGAAAGAACGACATGGTGAGACCAAGTTTCGGTGAACAAGGCCCACACTTTATTTTCCAAAGTAGTTTTTATACCTTAAGTTATGCATAGAGGATAATGGGGGAAGGGGTAGAGTCATGCAGTAAGCCAGGCTTTCTTCCTGCAAACTTATCATATGCAAAAGTTTAGGTGATTTGCATCATCTTCTGGCCCGGAGGCCTTTTTCTCTAAAGGT…	intronic	gene-DCTN5
25	21444351	21445588	CCGGGGTCCAGCCCTGGCTGAGCCAGGGTATTCGAAGGGGAGACGGCTTCGGCGACTATTTAAATATTCATCAAAGATATAAAGAGTAATAGAATGAGGATAGCTCAGTAGGAAAACTCAGTGGAGAAAGAGGCTGAGTAGCTTGGTTTACGCGGGAGACCAATAAACTTCAGACAAGAAGTTTGCACCACTTTACGTAGGCCACAGGCGTCCTTCCGTTCTCCCGAAGGAGAGGAGACACTGAGGCCTCCCTGGTCGGATCTTAGAAGCCCAGGCATAATTAGTAAGCATGGCGGGTTCCGCGCTCCAGATGGAGACTCAGCCAGAGTGAGAGAAAGAGCAACATGAGGAGACCAGTATTTCGAGAAACTGATCCCAATTCTTTATTTTCCATGGTCT…	CT	intergenic	gene-CHP2(dist=38318),gene-TRNAE-CUC-30(dist=4292)
25	21444445	21444563	TGAGGATAGCTCAGTAGGAAAACTCAGTGGAGAAAGAGGCTGAGTAGCTTGGTTTACGCGGGAGACCAATAAACTTCAGACAAGAAGTTTGCACCACTTTACGTAGGCCACAGGCGTCC	TAGA	intergenic	gene-CHP2(dist=38412),gene-TRNAE-CUC-30(dist=5317)
25	21445261	21445335	TCTCACGGGTGGGGAGGCTGTGAGCAATCACAATGGCCGGACAGCCTGTCAGGCAGGCCAAGAGAACGTTCAGAG	T	intergenic	gene-CHP2(dist=39228),gene-TRNAE-CUC-30(dist=4545)
25	25022060	25023303	CGATTAGTGCCGGGAGCCGGCATATTGCATATTGAGTGCATATTGCATATTGAGTGCAGCACTTTCCACAGCATCATCTTTCAGGATCTGGAGTAGCTCAACTGGAATTCTATCACTGCCGGTAGCCAGCATGAGGTACTCCGCCCATGACAAAGGTCATGAGGAAGGAGGCTCGGCACACGCAAAGGCGGGATCGAGCCTCAGGAGTCCCCCTGGAAATTCTCGAGCATCTACCCCCAAAATCAGAGTCTGCCTACTTTCTGCTTTGTGCTTTCACCTACACCTCTGACTTTATGGGGGGCTGTCCCCCACTACCTCTCTGAAAAAAGAGTTAGCTTACAGCTCCAGTTAATAATTCCTGGGTGTGACAGTGTTTAACCTACAAACTCCTTTGGAAAT…	C	intronic	gene-GTF3C1
25	29441235	29443604	GAGGCTCTGCCGGGAGCCGGCATATTGCATATTGAGTGCATATTGCATATTGCATATTGAGTGCAGCACTTTCCACAGCATCATCTTTCAGGATCTGGAATAGCTCAACTGGAATTCTATCTCTGCCGGTAGCCAGTGTGAGGAACTCCGCCCATGACAAAGGTCATGAGGAAGGAGGCTCGGCACACGCAAAGGCGGGATCGAGCCTCAGGAGTCTCCCTGGAAATTCTCGAGCAATCTACCCCCAAAACCAGAGTCTGCCTACTTTCTGCTTTGTGCTTTCAGCTACACCTCTGACTTTACGGGGGGCTGTCCCCCACTACCTCTCTCTGAAAAAAGAGTTAGCTTACAGCTCCAGTTAATAATTCCTGGGTGTGACAGTGTTTAACCTACAAACTC…	G	intronic	gene-GALNT17
25	29444437	29444438	AT	ACTTTGCATCCCCTGTTATCCTCTATGTGTAACTTAGGGTATACTTTGCATCCCCTATTATCCTCTATGTGTAACTTAGGGTATAAAA	intronic	gene-GALNT17
25	35515557	35516846	GCACCATTGTTGGGGGCCAGAGTGAGGTACTCCGCCCGTGACAAAGGTCATGAGGAAGGAGGCTCGACATACGCAAAGGCGGGATCGAGCCTCAGGAGTCCCCCTGGAACTCCTCGAGCATCTACCCCCATAACCAGAGCCTGCCTACTTTACTACTTTGTGCTCACCTACACCTCTGACTTTACGGGGGGCTGTCCCCCACCACCTCTTTTGGAGAAGGAGTTAATTTAGAGCTCCAGTTTATAATAATTCCTGGGCGTGATAAGAGTGTTTTAACCTACAAACTCCTCTGAAGGTTCTCTAGCCTGCCTGACAGGCTCGTCCGGCCACATGTGATTGCTCACAGCCTCCCAACCGTGAGAGGCACAAGATGCTTTAAACCCTCTAAAAACGGGTTCT…	G	intergenic	gene-LOC618076(dist=2347),gene-NAT16(dist=43794)
25	36151395	36152683	ATGTTGGGGGCCAGAGTGAGGTACTCCGCCCATGGCAAAGGTCATGAGGAAGGAGGCTCGACATACGCAAAGGCGGGATCGAGCCTCAGGAGTCCCCCTGGAAATCCTCGAGCGTCTACCCCCATAACCAGAGCCTGCCTACTTTACTACTTTGTGCTCTCACCTACATCTCTGACTTTACGGGGGGCTGTCCCCCACCACCTCTTTCGGAGAAGGAGTTAACCTAGAGCTCCAGTTAATAATAATTCTTGGGCGTGATAAGAGTGTTTTAACCTACAAACTCCTCTGAAGGTTCTCTAGCCTGCCTGACAGGCTCGTCCAGCCACATGTGATTGCTCACAGCCTCCCAACCGTGAGAGGAACAAGATGCTTTAAACCCTCTAAAAACAGGTTCTTTAG…	A	intronic	gene-PILRA
25	37001195	37002494	GGCAACCTGCCGGGGACCAGCCCCAGCTGATCCAGGGTACTCGAAGGAGAGACGGCGTCGGCGAGGGTCAGGATACGATAGTTTCAATTAGATATTAATTAGAGATATAAAGAGTAATAGACTAAGGATAGCTCAGTAGGAAAATTCAGTGGAGAAAAGAGGCTGAGTAGCTTGGTTTACGCGGGGGACCAATAAAACTTCAAGACAAGAAGCTTGCACCACTTACGTAGGCCGCAGGCGTCCTTCCGTTCTCCCGAAGGAGAGGAGACACTGAGGCCTCCCCGGTCGGATCTTAGAAGCCCAGGCAAAATTAGTAAGCTTGGTGGGTTCCGCGCTCCAGATGGAGACTCAGCCAGAGGGAGAGAGAGACATGGGGAGACCAGTATTTTGAGAAACTGA…	G	intronic	gene-PDAP1
25	37001330	37001428	GTAGGAAAATTCAGTGGAGAAAAGAGGCTGAGTAGCTTGGTTTACGCGGGGGACCAATAAAACTTCAAGACAAGAAGCTTGCACCACTTACGTAGGCCG	GC	intronic	gene-PDAP1
25	37002067	37002118	TTATACTTATACTAATAGTTTTCTAACTTTTCTAAGGAACCTGTTTTTAGAA	T	intronic	gene-PDAP1
25	37483490	37483490	G	GCCGGAGTGTTGGGGGCCAGAGTGAGGTACTCCGCCCGTGACAAAGGTCATGAGGAAGGAGGCTCGACATACGCAAAGGCGGGATCGAGCCTCAGGAGTCCCCCTGGAACTCCTCGAGCATCTACCCCCATAACCAGAGCCTGCCTACTTTACTACTTTGTGCTCACCTACACCTCTGACTTTACGGGGGGCTGTCCCCCACCACCTCTTTTGGAGAAGGAGTTAATTTAGAGCTCCAGTTTATAATAATTCCTGGGCGTGATAAGAGTGTTTTAACCTACAAACTCCTCTGAAGGTTCTCTGGCCTGCCTGACAGGCTTGTCCGGCCACATGTGATCGCTCACAGCCTCCCAACCGTGAGAGGCACAAGATGCTTTAAACCTTCTAAAAACAGGTTCC…	intergenic	gene-TMEM130(dist=105859),gene-NPTX2(dist=16629)
25	41035030	41035030	C	CGGGCACTGTTGGGGGCCAGAGTGAGGTACTCCACCCGTGACAAAGGTCATGAGGAAGGAGGCTCGACATACGCAAAGGCGGGATCGAGCCTCAGGAGTCCCCCTGGAACTCCTCGAGCATCTACCCCCATAACCAGAGCCTGCCTACTTTACTACTTTGTGCTCACCTACACCTCTGACTTTACGGGGGGCTGTCCCCCACCACCTCTTTTGGAGAAGGAGTTAACTTAGAGCTCCAGTTTATAGTTTATAATAATTCCTGGGCGTTATAAGAGTGTTTTAACCTACAAACTCCTCTGAAGGTTCTCTAGCCTGCCTGACAGGCTCGTCCGGCCACATGTGATTGCTCACAGCCTACCAACCGTGAGAGGCACGAGATGCTTTAAACCTTCTAAAAAC…	intronic	gene-MAD1L1
26	3492758	3503323	TACCAACTGCCGGGGACCAGCCCCAGCTGATCCAGGGTACTCGAAGGAGAGACGGCGTCGGCGAGGGTCAGGATACGATAGTTTCAATTAGATATTAATTAGAGATATAAAGAGTAATAGACTAAGGATAGCTCAGTAGGAAAATTCAGTGGAGAAAAGAGGCTGAGTAGCTTGGTTTACGCGGGGGACCAATAAAACTTCAAGACAAGAAGCTTGCACCACTTACGTAGGCCGCAGGCGTCCTTCCGTTCTCCCGAAGGAGAGGAGACACTGAGGCCTCCCCGGTCGGATCTTAGAAGCCCAGGCAAAATTAGTAAGCTTGGTGGGTTCCGCGCTCCAGATGGAGACTCAGCCAGAGGGAGAGAGAGACATGGGGAGACCAGTATTTTGAGAAACTGA…	T	exonic	gene-LOC100848463,gene-LOC104975936
26	8091559	8092844	GAGGTGTGTTGGAGGCCAGAGTGAGGTACTCCGCCCGTGACAAAGGTCATGAGGAAGGAGGCTCGACATACGCAAAGGCAGGATCGAGCCTCAGGAGTCCCCCTGGAACTCCTCGAGCATCTACCCCCATAACCAGAACCTGCCTACTTTACTACTTTGTGCTCTCACCTACATCTCTGACTTTATGGGGGGCTGTCCCCCACCACCTCTTTCGGAGAAGGAGTTAACCTAGAGCTCCAGTTAATAATAATTCCTGGGCGTGATAAGAGTGTTTTAACCTACAAACTCCTCTGAAGGTTCTCTAGCCTGCCTGATAGGCTTGTCCGGCCACATGTGATTGCTCACAGCCTCCCAACCGTGAGAGGCACGAGATGCTTTAAACCTTCTAAAAACAGGTTC…	G	intronic	gene-PRKG1
26	31849870	31849870	T	TATGTGCCGGGGACCAGCCCCGGCTGATCCAGGGTATTCGAAGCGGGGACGGCGTCG	intergenic	gene-ADRA2A(dist=259872),gene-GPAM(dist=835669)
26	31849870	31850750	TGCGAGGATCAGGAAACAACTGCTTAATTAAATGTTAATTAAGGATATAAAGAGTAATAGAATGAGGATAGCTCAGTGAAGAAATTCAGTGGAGAAAAGAGGCTGAAATAAGGATAGCTCAGTGAGGAAATTCAGTGGAGAAAAGAGGCTGAATAATTCAGCCAGAAGGTAAGAGAAAGAACGACACGGTGAGACCAAGTTTCGGTGAACAAGGCCCACACTTTATTTTCCAAAGTAGTTTTTATACCTTAAGTTATGCATAGAGGATAATGGGGGAAGGGGTAGAGTCATGCAGTAAGCCAGGCTTTCTTCCTGCAAACTTATCATATGCAAAAGTTTAGGTGATTTGCATCATCTTCTGGCCCGGAGGCCTTTTTCTCTAAAGGTGATTATTCTAAA…	TAT	intergenic	gene-ADRA2A(dist=259872),gene-GPAM(dist=834789)
26	34409861	34409863	TTG	TCTTACATTCCTACAGGGTGAGGGTGTAGTGGGTTTTAGCTAAGGAAAGAATTTACTTAGCCTAAGGTCTAACGTGATTAATATCAAAGGTTAATACTTATTTCTTCTATATATTCATTAATGTGTGTAAGGGCAGGGGATGTGGAGACTTAGCAACAAACATTGGCTCAACAAATGAAAAACCCTTCACCAATACAATTTCTAATCAGCCCGTTATACTTATACTAATAGTTTTCTAACTTCTCTAAAGAACCCGTTTTTAGAGGGTTTAAAGCATCTTGTGCCTCTCACGGTTGGGAGGCTGTGAGCAATCACATGTGGCCGGACGAGCCTGTCAGGCAGGCTAGAGAACCTTCAGAGGAGTTTGTAGGTTAAAACACTCTTATCACGCCCAGGAAT…	intergenic	gene-NHLRC2(dist=47011),gene-ADRB1(dist=103054)
26	35976029	35984631	AAGGGAAGTGCCGGGGACCAGCCCCGGCTGAACCAGGGTATTCGAAGGAGAGACGGCGTAGGCGAAGATCAGGAAACAATTGCTTAATTAAATGTTAATTAAGGATATAAAGAGTAATAGAATGAGGATAGCTCAGTAGGAAAATTCAGTGAAGAAAAGAGGCTGAAATAAGGATAGCTCAGTGAGGAAATTCAGTGGAGAAAAGAGGCTGAATAATTCAGCCAGAAGGTAAGAGAAAGAACGACATGGTGAGACCAAGTTTCGGTGAACAAGGCCCATACTTTATTTTCCAAAGTAGCTTTTATACCTTAAGTTATGCATAAAGGATAATGGGGGAAGGGGTAGAGTCAGGCAGCAAGCCAGGCTTTCTTCCTGCAAACTTAGCATATGCAAAAGTTA…	A	intronic	gene-ATRNL1
26	38153655	38162369	CCCTGAGTGCCGGGGACCAGCCCCGGCTGATCCAGGGTATTCGAAGCGGGGACGGTGTCGGCGAGGATCAGGAAACAACTGCTTAATTAAACGTTAATTAAGGATATAAAGAGTAATAGAATGAGGATAGCTCAGTGAGGAAATTCAGTGGAGAAAAGAGGCTGAGTAATTCAGCCAGAAGGTAAGAGAAAGAACGACATGGTGAGACCAAGTTTCGGTGAACAAGGCCCGCACTTTATTTTTCAAAGTAGTTTTTATACCTTAAGTTATGCACAGAGGATAATGGGGGAAGGGGTAGAGTCTTGCAGCAAACCAGGCTTTCTTCCTGCAAACTTATCATATGCAAAAGCTTAGGTGATTTGCATCATCTTCTGGCCCGGAGGCCTGTTAACATTTTAA…	C	intergenic	gene-TRNAC-ACA-98(dist=201634),gene-RAB11FIP2(dist=117424)
26	40338419	40339545	TGGGAACTGCCGGGGACCAGCCCCGGCTGATCCAGGGTATTCGAAGGAGAGACTGCGTAGGCGAAGATCAGGAAACAATTGCTTAATTAAATGTTAATTAAGGATATAAAGAGTAATAGAATGAGGATAGCTCAGTAAAATTCAGTGAAGAAAAGAGGCTGAAATAAGGATAGCTCAGTGAGGAAATTCAGTGGAGAAAAGAGGCTGAATAATTCAGCCAGAAGGTAAGAGAAAGAACGACATGGTGAGACCAAGTTTCGGTGAACAAGGCCCGTACTTTATTTTCCAAAGTAGTTTTTATACCTTAAGTTATGCATAGAGGATAATGGGGGAAGGGGTAGAGTCAGGCAGCAAGCCAGGCTTTCTTCCTGCAAACTTAGCATATGCAAAAGTTAGGTG…	T	intergenic	gene-SEC23IP(dist=297234),gene-PLPP4(dist=170184)
26	46201057	46201057	T	TGTCTTGTGTTGGGGGCCAGAGTGAGGTACTCCGCCCATGGCAAAGGTCATGAGGAAGGAGGCTCGACATACGCAAAGGCGGGATCGAGCCTCAGGAGTCCCCCTGGAAATCCTCGAGCGTCTACCCCCATAACCAGAGCCTGCCTACTTTACTACTTTGTGCTCTTACCTACACCTCTGACTTTACGGGGGGGCTGTCCCCCACCACCTCTTTCGGAGAAGGAGTTAACCTAGAGCTCCAGTCAATAAAAACTCTTGGGTGTGACAAGAGTGTTTTAACCTACAAACTCCTCTGAAGGTTCTCTAGCCTGCCTGACAGGCTCGTCCGGCCATATGTGATTGCTCACAGCCTCCCAACCATGAGAGGCACGAGATGCTTTAAACCTTCTAAAAACAGGT…	intergenic	gene-C26H10orf90(dist=15313),gene-DOCK1(dist=191384)
26	50553586	50553586	T	TCACATCTGCCGGGGACCAGCCCCGGCTGATCCAGGTATTCGAAGGAGAGACGGCGTAGGCGAAGATCAGGAAACAATTGCTTAATTAAATGTTAATTAAGGATATAAAGAGTAATAGAATGAGGATAGCTCAGTGAGGAAATTCAGTGGAGAAAAGAGGCTAAATAATTCAGCCAGAAGGTAAGAGAAAGAACGACATGGTGAGACCAAGTTTCGGTGAACAAGGCCCGCACTTTATTTTCCAAAGTAGTTTTTATACCTTAAGTTATGCATAGAGGATAATGGGGGAAGGGGTAGAGTCATGCAGCAAGCCAGGCTTTCTTCCTGCAAACTTATCATATGCAAAAGCTTAGGTGATTTGCATCATCTTCTGGCCCGGAGGCCTGTTAACATTTTAAG…	intronic	gene-TCERG1L
26	51401001	51402306	TGGAAAGTGTTGGGGGCCAGAGTGAGGTACTCCACCCGTGACAAAGGTCATGAGGAAGGAGGCTGGACATACGCAAAGGCGGCATCGAGCCTCAGGAGTCCCCCTGGAAATCCTCAAGCATCTACCCCCATAACCAGAGCCTGCCTACTTTACTACTTTGTGCTCTTACCTACACCTCTGACTTTACGGGGGGCTGTCCCCCACGACCTCTTTCGGAGAAGGAGTTAACCTAGAGATCCAGTTAATAATAATTCCTGGGCATGATAAGACTGTTTTAACCTACAAACTCCTCTGAAGGTTCTCTAGCCTGCCTGACAGGCTTGTCCGGCCACATGTGATTGCTCACAGCCTCCCAACCGTGAGAGGCACGAGATGCTTTAAACCCTCTAAAAACAGGTT…	T	intergenic	gene-BNIP3(dist=175700),gene-JAKMIP3(dist=294052)
27	2483517	2484749	GAAAGGCTGCCGGGAGCCGGCATATCGCATATTGAGTGCATATTGCATATTGAGTGCAGCACTTTCCACAGCATCATCTTTCAGGATCTGGAATAGCTCAACTGGAATTCTATCACTGCCAGGAGCCAGCGTGAGGAGCTCCACCCATGACAAAGGTCATGAGGAAGGAGGCTTGGCATACACAAAGGCGGGATCGAGCCTCAGGAGTCCCCCTGGAAATTCTCGAGTATCTACCCCCAAAACCAGAGTCTGCCTACTTTCTGCTTTGTGCTCTCACCTACACCTCTGACTTTCCGGGGGGCTGTCCCCCACTACCTCTCTCTGAAACAAGAGTTAGCTTACAGCTCCAGTTAATAATTCCTGGGTGTGACAGTGTTTAACCTACAAACTCCTTTGGAA…	G	intronic	gene-CSMD1
27	3231671	3231774	TTTGCTGGCATATTGAGTGCAGCACTTTCACAGCATCATATTTTAAGATTTGAAATAGCTCAACTGGAATTCCATCACCTCCACTAGCTTTGTTCATAGTGATA	T	intronic	gene-CSMD1
27	4082549	4083671	TAAAACATTGCCGGGGACCAGCCCCGGCTGATCCAGGGTATTCGAAGGAGAGACGGCGTAGGCGAAGATCAGGAAACACTTGCTTAATTAAATGTTAATTAAGGATATAAAGAGTAATAGAATGAGGATAGCTCAGTAAAATTCAGTGAAGAAAAGAGGCTGAAATAAGGATAGCTCAGTGAGGAAATTCAGTGGAGAAAAGAGGCTGAATAATTCAGCCAGAAGGTAAGAGAAAGAACGACATGGTGAGACCAAGTTTCGGTGAACAAGGCCCGCACTTTATTTTTCAAAGTAGTTTTTATACCTTAAGTTATGCACAGAGGATAATGGGGGAAGGGGTAGAGTCTTGCAGCAAACCAGGCTTTCTTCCTGCAAACTTATCATATGCAAAAGCTTAGG…	T	intronic	gene-CSMD1
27	11242008	11242008	C	CACAGACACATGCCGGGGTCCAGCCCCGGCTGATCCAGGGTGTTCGAAGGGGAGACGGCTTAGGTGACTATTTAAATATTCATCAAAGATATAAAGAGTAATAGAATAAGGATAGCTCAGTAGGAAAATTCAGTGGAGAAAAGAGGCTGAGTAGCTTGGTTTACGCGGGAGACCCATAAAACTTCAAGACAAGAAGCCTGCACCACTTACGTAGGCCACAGGCGTCCTTCCGTTCTCCCGAAGGAGAGGAGACATTGAAGCCTTCCCGGTCGGATCTTAGAAGCCCAGGCATAATACGTAAGCATGGCGGGTTCCGTGCTCCAGATGGAGACTCAGCCAGAGTGAGAGAGAGAGAGACATGGGGAGACCAGTCTTTCGAGGAACTGATCCCAATTCTTT…	intergenic	NONE(dist=NONE),gene-TRNAS-ACU-2(dist=198675)
27	12578859	12580161	TACCATAGTGCCGGGGACCAGCCCCGGCTGATCCAGGGTATTCGAAGGAGAGACGGCATAGGCGAGGATCAGGATACAATAGCTTCAGTTAGATATTAATTAAAGATATAAAGAGTAATAGAATGAGGATAGCTCAGTAGGAAAATTCAGTGGAGAAAAGAGGCTGAGTAGCTTGGTTTACGCGGGAGACCAATAAAACTTCAAGACAAGAAGTTTGCACCACTTACGTAGGCCGCAGGCGTCCTTCTGTTCTCCCGAAGGAGAGGAGACACTGAGGCCTCCCCAGTCGGATCTTAGAAGCCCAGGCATAATTAGTAAGCATGGTGGGTTCCGAGCTCCAGATGGAGACTCAACCAGAGTGAGAGAGAGAGCGACATGGGGAGACCAGTATTTCGAGAA…	T	intergenic	gene-TRNAW-CCA-59(dist=224100),gene-TENM3(dist=739471)
27	12579731	12580458	GCCCATTATACTTATACTAATAGTTTTCTAACTTTTCTAAGGAACCTGTTTTTAGAAGGTTTAAAGCATCTCGTGCCTCTCACGGTTGGGAGGCTGTGAGCAATCACATGTGGCCGGACAAGCCTGTCAGGCAGGCCAGAGAACCTTCAGAGGAGTTTGTAGGTTAAAACACTCTTATCACGCCCAGGAATTATTATAAACTGGAGCTCTAAGTTAACTCCTTCTCCAAAAGAGGTGGTGGGGGACAGCCCCCCGTAAAGTCAGAGGTGTAGGTGAGCACAAAGTAGTAAAGTAGGCAGGCTCTGGTTATGGGGGTAGATGCTCGAGGAGTTCCAGGGGGACTCCTGAGGCTCGATCCCGCCTTTGCGTATGTCGAGCCTCCTTCCTCATGACCTTTGT…	G	intergenic	gene-TRNAW-CCA-59(dist=224972),gene-TENM3(dist=739174)
27	17322278	17322278	C	CAACTCCTGCCGGGGTCCAGCCCCGGTGGATCCAGGGAATTCGAAGCGGGGACGGCGTCGGCGAGGATCAGGAAACAATTGCTTAATTAAACGTTAATTAAGGATATAAAGAGTAATAGAATGAGGATAGCTCAGTGAGGAAATTCAGTGGAGAAAAGAGGCTGAATAATTCAGCCAGAAGGTAAGAGAAAGAACGACATGGTGAGACCAAGTTTCGGTGAACAAGGCCCGCACTTTATTTTCCAAAGTAGTTTTTATACCTTAAGTTATGCATAGAGGATAATGGGGGTAGGGGTAGAGTCATGCAGTAAGCCAGGCTTTCTTCCTGCAAACTTATCATATGCAAAAGTTTAGGTGATTTGCATCATCTTCTGGCCCGGAGGCCTTTTTCTCTAAAGG…	intergenic	gene-LOC112444595(dist=757080),gene-ZFP42(dist=242284)
27	20467207	20468512	AAATAGAACTATTGCCGGGGACCAGCCCCGGCTGATCCAGGGTATTCGAAGGAGAGACGGCATAGGCGAGGATCAGGATACAATAGTTTCAATTAGATATTAATTAAAGATATAAAGAGTAATAGAATAAGGATAGCTCAGTAGGAAAATTCAGTGGAGAAAAGAGGCTGAGTAGCTTGGTTTACACGGGAGACCAATAAAACTTCAAGACAAGAAGTTTGCACCACTTACGTAGGCCGCAGGCGTCCTTCCGTTCTCCCGAAGGAGAGGGGACACTGAGGCCTCCCCGGTCGGATCTTAGAAGCCCAGGCATAATTAGTAAGCATGGTGGGTTCCGCGCTCCAGATGGAGACTCAGCCAGAGTGAGAGAGAGAGCGACATGGGGAGACCAGTATTTCG…	A	intergenic	gene-FGF20(dist=248650),gene-TRNAC-ACA-102(dist=430602)
27	21364778	21364778	T	TACCACCTGCCGAGGTCCAGCCTCGGCTGATCCAGGGAGTTCGAAGCGGGGACGGCGTCGGCGAGGGTC	intronic	gene-TUSC3
27	29307031	29307031	A	AAGTTGAGTGTTGGGGGCCAGAGTGAGGTACTCCGCCCATGGCAAAGGTCATGAGGAAGGAGGCTCGACATACGCAAAGGCGGGATCGAGCCTCAGGAGTCCCCCTGGAAATCCCCGAGCGTCTACCCCCATAACCAGAGCCTGCCTACTTTACTACTTTGTGCTCTTACCTACACCTCTGACTTTACGGGGGGCTGTCCCCCACCACCTCTTTCGGAGAAGGAGTTAACCTAGAGCTCCAGTTAATAATAATTCCTGGGCGTGATAAGAGTGTTTTAACCTACAAACTCCTCTGAAGGTTCTCTAGCCTGCCTGACAGGCTCGTCCGGCCACATGTGATTGCTCACAGCCTCCCAACCAATCTTGAGAGGCGCAAGATGCTTTAAACCCTCTAAAAAC…	intergenic	gene-DUSP26(dist=18379),gene-UNC5D(dist=1425529)
27	30835554	30835554	G	GATTTCACTGCCGAGGACCAGCCCCGGCTGATCCAGGGTATTCGAAGGGGAGACGGCGTCGGCGACTATTTATATGCTAATTAGAGATACAGAGAACAATAGAATGAGGATAGCTCAGTAGGAAAATTCAGTGGAGAAAAGAAGCTGAGTAGCTTGGTTTACGCGGGAGACCAATAAAACTTCAAGACAAGAAGTTTGCACCACTTACGTAGGCCGCAGGCGCCCTCTCGAATAGCGGAAGGTGTCTCACCCTAGACACCTTCTCGAGTGGGTCTTAGAAGCCCAGGCATGATTAGTAAGCGTGGTGGGTTCCGCGCTCCAGATGGAGACTCAGCTGGAAGTTAAAAGAAAGAATGACATGGGGAGACCAAGCGTTGGTGAGCAAGGCCCGTAGCTTTA…	intronic	gene-UNC5D
27	31610485	31611387	TCTTCTCTGCCTGGACCTTTAAGTGCCTTAAATGACCTGGCAGATTCACTAACTAAGGTCACAGTGGCTTCTGCTTTTGAAGAAGCCCGAGCTTCTCATTCACTCCACCATCAAAATGCTACTGCGCTAAGATATCAATTTCAGATTCCTCGAGACTCTGCTCGGGAGATTGTTCGTTCCTGTTCTCATTGTCCCACTACTATAAATAGTTTACCTATGGGAGTTAACCCTCGAGGTCTTAAACCTAATGCACTCTGGCAGATGGATGTAACTCACATCTCTTCATTTGCAAAATTGTCTTTTGTTCATGTAACAGTAGACACCTTTTCTCATGTTATTGTTGCAACTGCTCGCACAGGGGAAGCAGTTAAAGACATAATACAACATCTCTTTACTTGT…	T	intergenic	gene-TRNAG-CCC-170(dist=208066),gene-KCNU1(dist=525581)
27	38386769	38386769	G	GCCTTCTTGTGGGGAGCGAGCTCCGCCCGTGGCAAAGGTCATGAGGAAGGAGGCTTGGCATACGCAAAGGCGGGATCAAGCCTCAGGAGTCTCCCTGGAAATTCTCGAGCAATCTACCCCCAAAACCAGAGTCTGCCTACTTTCTGCTTTGTGCTTTCACCTACACCTCTGACTTTATGGGGGGCTGTCCCCCACTACCTCTCTCTGAAAAAAGAGTTAGCTTACAGCTCCAGTTAATAATTCCTGGGTGTGGCAGTGTTTCAACCTACAAACTCCTTTGGAAATCCTCTAGCCTGCCTGAATAGGTTTTTCCAGCCACACGTGATTGTTCAGAGCCTCCCAACTGTGAGAGGCATGAGATGTTCTAAACTGTCTAAATACAGATTCCTTTGAGCAGTT…	intergenic	gene-SH2D4A(dist=78985),gene-PSD3(dist=77678)
27	38525051	38525051	T	TGGAGGTTGCCGGGGACCAGCCCCGGCTGATCCAGGGTATTCGAAGGAGAGACGGCGTAGGCGAGGATCAGGATACAATAGCTTCAATTAGATATTAATTAAAGATATAAAGAGTAATAGAATAAGGATAGCTCAGTAGGAAAATTCAGTGGAGAAAAGAGGCTGAGTAGCTTGGTTTACGCGGGAGACCAATAAAACTTCAAGACAAGAAGTTTGCACCACTTACGTAGGCCGCAGGCGTCCTTCCGTTCTCCCGAAGGAGAGGAGACACTGAGGCCTCCCCGGTCGGATCTTAGAAGCCCAGGCATAATTAGCAAGCATGGTGGGTTCCGCGCTCCAGATGGAAACTCAACCAGAGTGAGAGAGAGAGCGACATGGGGAGACCAGTATTTCGAGAAA…	intronic	gene-PSD3
27	39944145	39945384	GACTCTTGTGCCGGGGACCAGCCCCGGCTGAACCAGGGTATTCGAAGGAGAGACGGCGTAGGCGAAGATCAGGAAACAATTGCTTAATTAAATGTTAATTAAGGATATAAAGAGTAATAGAATGAGGATAGCTCAGTAGGAAAATTCAGTGAAGAAAAGAGGCTGAAATAAGGATAGCTCAGTGAGGAAATTCAGTGGAGAAAAGAGGCTGAATAATTCAGCCAGAAGGTAAGAGAAAGAACGACATGGTGAGACCAAGTTTCGGTGAACAAGGCCCGCACTTTATTTTTCAAAGTAGTTTTTATACCTTAAGTTATGCACAGAGGATAATGGGGGAAGGGGTAGAGTCTTGCAGCAAACCAGGCTTTCTTCCTGCAAACTTATCATATGCAAAAGCTT…	G	intergenic	gene-LRRC3B(dist=555914),gene-LOC100847782(dist=11582)
27	43016078	43016078	C	CCTGCCGGGAGCCGGTGAGGCATTCCACTCGTGACAAAGGTCATGAGGAAGGAGGCTCGGGATACGCAAAGGCGGGATCGAGCCTCAGGAGTCCCCCTGGATATTCTCGAGCATCTTCCCCCAAAAAACCAGAGTCTGCCTACTTTATTGCTTTGTGCTCTCACCTCTGACTTTACTGGGGGCTGTCCCCCACCACCATCTCGCTCTCTCTGACAAAGAGTTAACTTACAGCTCCAATTAATAAAGTTCCTGGGCAATTAGGAGTGTTTAAATCCAAACCCCTCAGATGGCTCTCTAACTCGCCTGACAAGTTTACCCGGACTCCTACAGCTATGCATACGATTGTTTACAGTCTCCCAGCCTTGAGAGGCACAGGAAGCTTAAGATATTCAAATAGCT…	intergenic	gene-UBE2E2(dist=318647),gene-LOC100300804(dist=381289)
28	1375969	1375969	C	CCTAGATTGCCGGGAGCCGGCATATTGCATATTGAGTGCATATTGCATATTGAGTGCAGCACTTTCCACAGCATCATCTTTCAGGATCTGGAATAGCTCAACTGGAATTCTATCACTGCCGGTAGCCAGCGTGAGGAACTCCGCCCATGACAAAGGTCATGAACAAGGAGGCTCGGCATACGCAAAGGCGGGATCGAGCTTCAGGAGTCCCCCTGGAAATTCTCGAGCATATACCCCCAAAACCAGAGTCTGCCTACTTTCTGCTTTGTGCTTTCACCTACACCTCTGACTTTACAGGGGGCTGTCCCCCACTACCTCTCTGAAAAAAGTTAGCTTACAGCTCCAGTTAATAATTCCTGGGTGTGACAGTGTTTAACCTACAAACTCCTTTGGAAATCC…	intergenic	gene-CCSAP(dist=96059),gene-ACTA1(dist=24474)
28	5156420	5156420	T	TGTTGAGTGCCGGAGCCAGCCGGCAAAGTCGATCAGGTCCCGAGAACGTGCACGGAGGGGCTAAGAAAGAAACTAAAGCAAGAGACTACAAAGATGGGGTCGAGAGGTTCAGACATGTCACCACGAAGGGACGCAGTCTGACACCAACTTTATTCAACATCTCATATTTATACAGAAAAGCGTGAGAAAGACAAGACAGTTGACATTTTTTCTTGGTTGGCCTATACATCTTACAAACAGTCACAAGAAATCTTGAGAGCATGGGAATGGCTCCCTGTTATTATTTCTTACACCAGATAACATTTCTCTGTGCGTGAGAAGTTTGCACAGAACTCCAGGTGCCTGCAGTAAATAAGCGCCTAATCTCTGGGGTGGCGGGACAGAGAGCTATGTTTGCAA…	intergenic	gene-TRNAG-GCC-25(dist=22104),gene-SIPA1L2(dist=62446)
28	7174345	7174345	G	GGTATTTTGTTGGGGGCCAGAGTGAGGTACTCCGCCTGTGACAAAGGTCATGAGGAAGGAGGCTCGACATACGCAAAGGCGGGATAGAGCCTCAGGAGTCCCCCTGGAACTCCTCGAGCATCTACCCCCATAACCAGAGCCTGCCTACTTTACTACTTTGTGCTCACCTACACCTCTGACTTTACGGGGGGCTGTCCCCCACCACCTCTTTTGGAGAAGGAGTTAACTTAGAGCTCCAGTTTATAATTCCTGGGCGTGATAAGAGTGTTTTAACCTACAAACTCCTCTGAAGGTTCTCTGGCCTGCCTGACAGGCTTGTCCGGCCACATGTGATCGCTCACAGCACAAGATGCTTTAAACCTTCTAAAAACAGGTTCCTTAGAAAAGTTAGAAAACTAT…	intergenic	gene-SLC35F3(dist=18960),gene-TRNAS-GGA-39(dist=10146)
28	11728767	11729874	GTGTTGGGGGCCAGAGTGAGCTCCGCCTCTGGCAAAGGTCATGATGAAGGAGGCTTGGCATACGCAAAGGCGGGATCAAGCCTCAGGAGTCTCCCTGGAAATTCTCGAGCAATCTACCCCCAAAACCAGAGTCTGCCTACTTTCTGCTTTGTGCTTTCACCTACACCTCTGACTTTACGGGGGGCTGTCCCCCACTACCTCTCTGAAAAAAGTTAGCTTACAGCTCCAGTTAATAATTCCTGGGTGTGACAGTGTTTAACCTACAAACTCCTTTGGAAATCCTCTAGCCTGCCTGAATAGGTTTTTCCGGCCACATGTGATTGCTCAGAGCCTCCCAACTGTGAGAGGCAGGAGATGTTCTAAACTGTCTAAACACAGATTCTTTTGAGTAGTTAAAAG…	G	intergenic	gene-TRNAC-GCA-257(dist=523680),gene-TRNAR-ACG-15(dist=531491)
28	14449288	14458095	GCCTATGTGTTGGGGGCCAGAGTGAGGTACTCCGCCCGTGACAAAGGTCATGAGGAAGGAGGCTCGACATACGCAAAGGCGGGATCGAGCCTCAGGAGTCCCCCTGGAACTCCTCGAGCATCTACCCCCATAACCAGAGCCTGCCTACTTTACTACTTTGTGCTCACCTACACCTCTGACTTTACGGGGGGCTGTCCCCCACCACCTCTTTTGGAGAAGGAGTTAATTTAGAGCTCCAGTTTATAATAATTCCTGGGCGTGATAAGAGTGTTTTAACCTACAAACTCCTCTGAAGGTTCTCTAGCCTGCCTGACAGGCTCGTCCGGCCACATGTGATTGCTCACAGCCTCCCAACCGTGAGAGGCACAAGATGCTTTAAACCCTCTAAAAACGGGTTCT…	G	intergenic	gene-BICC1(dist=130188),gene-PHYHIPL(dist=328795)
28	14450590	14450685	TACAGGGACGATTCGAAGGTAGGTCCCCAACCCTTTCCCCAGTGTTGAATTTTAGGGACGGATAGGACCCCACTCAGGGTGCCGCGGACCCCCCTG	T	intergenic	gene-BICC1(dist=131490),gene-PHYHIPL(dist=336205)
28	14456596	14456668	TCTCGACTGGATTTTACCGCCACTGGAGCAGCTAATGACTTTTTTCACACCTTCTCTAACTTTATTTCTGGAA	T	intergenic	gene-BICC1(dist=137496),gene-PHYHIPL(dist=330222)
28	14457603	14457676	ATTTGTGTGAAGCACCTGACTTTAATAAAAGTCAGGACTGCTGTCCCCACGTGACTTTTGTATAACATCTCAGT	A	intergenic	gene-BICC1(dist=138503),gene-PHYHIPL(dist=329214)
28	17173085	17174310	CAATATCTGCCGGGAGCCGGCATATTGCATATTGAGTGCATACTGCATATTGAGTGCAGCACTTTTCAGGATCTGGAATAGCTCAACTGGAATTCTATCACTGCCGGTAGCCAGCGTGAGGAACTCCGCCCATGACAAAGGTCATGAGGAAGGAGGCTCGGCATACGCAAAGGCGGGATCGAGCTTCAGGAGTCCCCCTGGAAATTCTCGAGCATATACCCCCAAAACCAGAGTCTGCCTACTTTCTGCTTTGTGCTCTCACCTACACCTCTAACTTTACGGGGGGCTGTCCCCCACTACCTCTCTGAAAAAAGTTAGCTTACAGCTCCAGTTAATAATTCCTGGGTGTGACAGTGTTTAACCTACAAACTCCTTTGGAAATCCTCTAGCCTGCCTGAA…	C	intergenic	gene-RHOBTB1(dist=395573),gene-TMEM26(dist=87043)
28	35976797	35978021	TGGGAGCTGCCGGGAGCCGGCATATTGCATATTGAGTGCATATTGCATATTGAGTGCAGCACTTTTCAGGATCTGGAATAGCTCAACTGGAATTCTATCACTGCCGGTAGCCAGCGTGAGGAACTCCGCCCATGACAAAGTCATGAGGAAGGAGGCTCGGCATACGCAAAGGCGGGATCGAGCTTCAGGAGTCCCCCTGGAAATTCTCGAGCATATACCCCCAAAACCAGAGTCTGCCTACTTTCTGCTTTGTGCTTTCACCTACACCTCTGACTTTACGGGGGGCTGTCCCCCACTACCTCTCTGAAAAAAGAGTTAGCTTACGGCTCCAGTTAATAATTCCTGGGTGTGACAGTGTTTAACCTACAAACTCCTTTGGAAATCCTCTAGCCTGCCTGA…	T	intronic	gene-SH2D4B
28	35976808	35976894	GGGAGCCGGCATATTGCATATTGAGTGCATATTGCATATTGAGTGCAGCACTTTTCAGGATCTGGAATAGCTCAACTGGAATTCTAT	GA	intronic	gene-SH2D4B
28	35977067	35977151	TGACTTTACGGGGGGCTGTCCCCCACTACCTCTCTGAAAAAAGAGTTAGCTTACGGCTCCAGTTAATAATTCCTGGGTGTGACAG	TTTT	intronic	gene-SH2D4B
28	35977467	35977556	TTTCTTGTTGTAGCCCACCACACCTTTGCTCTGTAGGAATGCAACTTTATCTAATGCTTTTGGAGGGTGGCTCCTGACCAATCACCTTTA	T	intronic	gene-SH2D4B
28	41871208	41875546	CTGCCGGAGCCAGCCGGCAAAGTCGATCAGGTCCCGAGAACGTGCACGGCGGGGCTAAGAAAGAAACTAAAGCAAGAGACTACAAAGATGGGGTCGAGAGGTTCAGACACGTCACCACGAAGGGACGCAGTCTGACACCAACTTTATTCAACATCTCATATTTATACAGAAAAGCGTGAGAGAGACAAAACAGTTGACATTTTTTCTTGGTTAGCCTATACATCTTACAAACAGTCACAAGAAATCTTGAGAGCATGGGAATGGCTCCCTGTTATTATTTCTTACACCAGATAACATTTCTCTGTGCGTGAGAAGTTTGCACAGAACTCCAGGTGCCTGCAGTAAATAAGCGCCTAATCTCTGGGGTGGCGGGACAGAGAGCTATGTTTGCAAGCAAAC…	C	intergenic	gene-GPRIN2(dist=63545),gene-PPYR1(dist=34194)
28	45925786	45926899	TTGTGGGGAGCGAGCTCCGCCTCTGGCAAAGGTCATGAGGAAGGAGGCTTGGCATACGCAAAGGCGGGATCAAGCCTCAGGAGTCTCCCTGGAAATTCTCGAGCAATCTACCTTCAAAACCAGAGTCTGCCTACTTTCTGCTTTGTGCTTTCACCTACACCTCTGACTTTACGGGGGGCTGTCCCCCACTACCTCTCTGAAAAAAGTTAGCTTACAGCTCCAGTTAATAATTCCTGGGTGTGACAGTGTTTAACCTACAAACTCCTTTGGAAATCCTCTAGCCTGCCTGAATAGGTTTTTCCGGCCACATGTGATTGTTCAGAGCCTCCCAACTGTGAGAGGCATGAGATGTTCTAAACTGTCTAAACACAGATTCTTTTGAGTAGTTAAAAGATTGAT…	T	intergenic	gene-COG2(dist=90743),NONE(dist=NONE)
29	6309966	6310580	GGGTCGGTGCCGGGGACCAGCCCCGGCTGAACCAGGGTATTCGAAGGAGAGACGGCGTCGGCGAAGATCAGGAAACAATTGCTTAATTAAACGTTAATTAAGGATATAAAGAGTAATAGAATGAGGATAGCTCAGTAGGAAAATTCAGTGAAGAAAAGAGGCTGAAATAAGGATAGCTCAGTGAGGAAATTCAGTGGAGAAAAGAGGCTGAAATAAGGATAGCTCAGTGAGGAAATTCAGTGGAGAAAAGAGGCTGAATAATTCAGCCAGAAGGTAAGAGAAAGAACGACATGGTGAGACCAAGTTTCGGTGAACAAGGCCCGCACTTTATTTTTCAAAGTAGTTTTTATACCTTAAGTTATGCACAGAGGATAATGGGGGAAGGGGTAGAGTCTTGCA…	G	intergenic	gene-NOX4(dist=6962),gene-TYR(dist=15830)
29	6310573	6310575	GGT	GAAAAAGAATTAACTCAAGGGTCCCAGGTTACAAACATTAAAGCTACTACTTACACCAATTATATTAATCAATACACTGCCAGGGACACAGCAGGTAAGGGATATGGAAACTTAGCAGCAAACATTGGCCCAACAAGTGAAAATCCCTTCACCAATACAATTTCTAATCAATCTTTTAACTACTCAAAAGAATCTGTGTTTAGACAGTTTAGGACATCTCCTGCCTCTCACAGTTGGGAGGCTCTGAACAATCACATGTGGCCGGAAAAACCTATTCAGGCAGGCTAGACGATTTCCAAAGGAGTTTGTAGGTTAAACACTGTCACACCCAGGAATTATTAACTGGAGCTGTAAGCTAACTCTTTTTTCAGAAAGGTAGTGGGGGACAGCCCCCCGTAA…	intergenic	gene-NOX4(dist=7569),gene-TYR(dist=15835)
29	10696095	10697377	AATCTAACTGCCGAGGACCAGCCCCGGCTGATCCAGGGTATTCGAAGGGGAGACGGCGTCGGCGACTATTTATATTGCTAATTAGAGATATAGAACAATGAATGAGGAAGCTCAGTAGGAGAATTCAGTGGAAAAAAAGCTGAGTAGCTTGTTTACGCGGAGACCAATAAAACTTCAAGACAAGAAGTTTTGCACCACTTACGTAGGCCGCAGGCCCCTCTCGAATAGCGGGAAGTGTCTCACCCTAGACACCTTCTCGAGTGGTCTTAGAAAGCCCAGCATGATTAGTAGCTGGTGGGTACCGCGCTCCAGATGGAGACTCAGCTGGAAGTTAAAAGAAAGAATGACATGGGGAGACAGCGTTGTGAGCAAGGCCCGAGCTTTATTTTAAACAGCGGC…	A	intronic	gene-DLG2
29	12366824	12366824	C	CCTTACCTGCCGGGGACCAGCCCCGGCTGAACCAGGGTATTCGAAGGAGAGACGGCGTCGGCGAAGATCAGGAAACAATTGCTTAATTAAACGTTAATTAAGGATATAAAGAGTAATAGAATGAGGATAGCTCAGTAGGAAAATTCAGTGGAGAAAAGAGGCTGAGATAAGGATAGCTCAGTGAGGAAATTCAGTGTAGAAAAGAGGCTGAATAATTCAGCCAGAAGGTAAGAGAAAGAACGACATGGTGAGACCAAATTTCGGTGAACAAGGCCCGCACTTTATTTTTCAAAGTAGTTTTTATACCTTAAGTTATGCACAGAGGATAATGGGGGAAGGGGTAGAGTCTTGCAGCAAACCAGGCTTTCTTCCTGCAAACTTATCATATGCAAAAGCTTA…	intergenic	gene-DLG2(dist=111000),gene-CCDC90B(dist=17986)
29	12642513	12643800	TTGCCGGGGACCAGCCCCGGCTGATCCAGGGTATTCGAAGGAGAGACGGCATAGGCGAGGATCAGGATACAATAGCTTCAATTAGATATTAATTAAAGATATAAAGAGTAATAGAATAAGGATAGCTCAGTAGGAAAATTCAGTGGAGAAAAGAGGCTGAGTAGCTTGGTTTACGTGGGAGACCAATAAAACTTCAAGACAAGAAGTTTGCACCACTTACGTAGGCCGCAGGCGTCCTTCCGTTCTCCCGAAGGAGAGGAGACACTGAGGCCTCCCCGGTCGGATCTTAGAAGCCCAGGCATAATTAGTAAGCATGGTGGGTTCCGCGCTCCAGATGGAGACTCAACCAGAGTGAGAGAGAGAGCGACATGGGGAGACCAGTATTTCGAGAAACTGATC…	T	intronic	gene-RAB30
29	12889522	12889522	C	CATGTATTGCTGGGAGCGAGCTCTGCCCGTGGCAAAGGTCATGAGGAAGGAGGCTTGGCATACGCAAAGGCGGGATCGAGCCTCAGGAGTTCCCCTGGAAATTCTCGAGCATCTACCCCCCAAACCAGAGTCTGCCTACTTTCTGCTTTGTGCTTTCACCTACACCTCTGACTTTACGGGGGGCTGTCCCCCACTACCTCTCTCTGAAAAAAGAGTTAGCTTACAGCTCCAGTTAATAATTCCTGGGTGTGACAGTGTTTCAACCTACAAACTCCTTTGAAAGTCCTCTAGCCTGCCTGAATAGGTTTTTCCGGCCACATGTGATTGCTCAGAGCCTCCCAACTGTGAGAGGCATGATATGTTCTAAACTGTCTAAATACAGATTCCTTTGAGCAGTTA…	intergenic	gene-PRCP(dist=58731),gene-FAM181B(dist=35949)
29	19642030	19642032	AAT	ACCAGGGTATTCTAAGGGGAGATGGAGTGGGCGACTATTTACATATTTATCAAAGATATA	intergenic	gene-LOC112444840(dist=397542),gene-LUZP2(dist=438244)
29	22823972	22823972	G	GATATAGTGCCGGGAGCCGGCATATTGCATATTGAGTGCATATTGCATATTGAGTGCAGCACTTTTCAGGATCTGGAATAGCTCAACTGGAATTCTATCACTGCCGGTAGCCAGCGTGAGGAACTCCGCCCATGACAAAGGTCATGAGGAAGGAGGCTCGGCATACGCAAAGGCGGGATCGAGCTTCAGGAGTCCCCCTGGAAATTCTCGAGCATATACCCCCAAAACCAGAGTCTGCCTACTTTCTGCTTTGTGCTTTCACCTACACCTCTGACTTTACGGGGGGCTGTCCCCCACTACCTCTCTGAAAAAAGTTAGCTTACAGCTCCAGTTAATAATTCCTGGGTGTGACAGTGTTTAACCTACAAACTCCTTTGGAAATCCTCTAGCCTGCCTGAA…	intergenic	gene-ANO5(dist=182058),gene-NELL1(dist=431820)
29	26760536	26761008	GTGCGGGGAGCTGCCCGTGAGAACGGGGTCCTTTGTCCGAAGGGCACAGCTCTGGGAGCTGCCTCAGTCCTTGAGGGTTTGCTTGCAAACATAGCTCTCTGTCCCGCCACCCCAGAGATTAGGCGCTTATTTACTGCAGGCACCTGGAGTTCTGTGCAAACTTCTCACGCACAGAGAAATGTTATCTGGTGTAAGAAATAATAACAGGGAGCCATTCCCATGCTCTCAAGATTTCTTGTGACTGTTTGTAAGATGTATAGGCTAACCAAGAAAAAATGTCAACTGTTTTGTCTCTCTCACGCTTTTCTGTATAAATATGAGATGTTGAATAAAGTTGGTGTCAGACTGTGTCCCTTTGTGGTGACGTGTCTGAACCTCTCGACCCCATCTTTGTAGTCT…	G	intergenic	gene-LOC100301071(dist=2284),gene-LOC100299628(dist=15379)
29	26817299	26818495	GCCTCTTTGCCGGGGTCCAGCCCCGGTGGATCCAGGGAATTCGAAGGGGGGACGGCGTCGGCGAGGATCAGGAAACAATTGCTTAATTAAATGTTAATTAAGGGTATAAAGAGTAATAGAATGAGGATAGCTCAGTAAAATTCAGTGAAGAAAAGAGGCTGAAATAAGGATAGCTCAGTGAGGAAATTCAGTGGAGAAAAGAGGCTGAATAATTCAGCCAGAAGGTGAGAGAAAGAACGACATGGTGAGACCAAGTTTCGGTGAACAAGGCCCACACTTTATTTTCCAAAGTAGTTTTTATACCTTAAGTTATGCATAGAGGATAATGGGGGAAGGGGTAGAGTCAGGCAGCAAGCCAGGCTTTCTTCCTGCAAACTTATCATATGCAAAAGCTTAGGT…	G	intergenic	gene-LOC100299320(dist=7765),gene-LOC100300434(dist=2280)
29	26817889	26817969	TATATTAATCAATACACTGCCAGGGACACAGCAGATAAGGGATATGGAAACTTAGCAGCAAACATTGGCCCAAGAAGTGAA	TGG	intergenic	gene-LOC100299320(dist=8355),gene-LOC100300434(dist=2806)
29	36982590	36982590	T	TGTTTTCTGCGGGGAGCCGGTGAGGCATTCTGCTCATGACAAAGGTCATGAGGAAGGAGGCTCGGCATACGCAAAGGCGGGATCGAGCCTCAGGAGTCCGCCTGGATATTCTCGAGCATTTTCCCCAAAATAACCAGAGTCTGCCTACTTTATTGCTTTGTGCTCTCACCTCTGACTTTACTGGGGGCTGTCCCCTACCACCATCTCTCTCTCTCTGTCAAAGACTTAACTTACAGCTCCAATTAATAAAGTTCCTGGGCAATTAGGAGTGTTTAAATCCAAACCCCTCAGATGGCTCTCTAACTCGCCTGACAAGTTTACCCGGACTCCTGCAGCTATGCATACGATTGTTTACAGTCTCCTAGCCTCCAGAGGCACGGGAAGCTTAAGATATTCAAA…	intergenic	gene-SNX19(dist=7290),gene-MS4A8(dist=72929)
29	38337949	38339068	GAATCAAAGAAATAAAAAAGGGGGAGATGCGGGGAGCGAGCTCCACCTCTGGCAAAGGTCATGAGGAAGGAGGCTTGGCATACACAAAGGCGGGATCAAGCCTCAGGAGTCTCCCTGGAAATTCTCGAGCAATCTACCCCCAAAACCAGAGTCTGCCTACTTTCTGCTTTGTGCTTTCACCTACACCTCTGACTTTACGGGGGGCTGTCCCCCACTACCTCTCTGAAAAAAGAGTTAGCTTATAGCTCCAGTTAATAATTCCTGGGTGTGACAGTGTTTCAACCTACAAACTCCCTTGGAAGTCCTCTAGCCTGCCTGAATAGGTTTTTCCGGCCACATGTGATTGCTCAGAGCCTCCAAACTGTGAGAGGCATGAGATGTTCTAAACTGTCTAAATAC…	G	intergenic	gene-PAG4(dist=111211),gene-PAG14(dist=3754)
29	39327188	39327188	G	GGACAGGTGCCGGGGACCAGCCCCGGCTGAACCAGGGTATTCGAAGGAGAGACGGCGTAGGCGAAGATCAGGAAACAATTGCTTAATTAAATGTTAATTAAGGATATAAAGAGTAATAGAATGAGGATAGCTCAGTAGGAAAATTCAGTGAAGAAAAGAGGCTGAAATAAGGATAGCTCAGTGAGGAAATTCAGTGGAGAAAAGAGGCTGAATAATTCAGCCAGAAGGTAAGAGAAAGAACGACATGGTGAGACCAAGTTTCGGTGAACAAGGCCCGCACTTTATTTTTCAAAGTAGTTTTTATACCTTAAGTTATGCACAGAGGATAATGGGGGAAGGGGTAGAGTCTTGCAGCAAACCAGGCTTTCTTCCTGCAAACTTATCATATGCAAAAGCTTA…	intergenic	gene-PAG3(dist=10592),gene-PAG6(dist=50189)
29	40527489	40527489	G	GGAAAAGTGCCGGGGACCAGCCCTGGCTGATCCAGGGTATTCGAAGGAGAGACGGCATAGGCGAGGATCAGGATACAATAGCTTCAATTAGATATTAATTAAAGATATAAAGAGTAATAGAATAAGGATAGCTCAGTAGGAAAATTCAGTGGAGAAAAGAGGCTGAGTGGCTTGGTTTACGCGGGAGACCAATAAAACTTCAAGACAAGAAGTTTGCACCACTTACGTAGGCCGCAGGCGTCCTTCCGTTCTCCCGAAGGAGAGGAGACACTGAGGCCTCCCCGGTCGGATCTTAGAAGCCCAGGCATAATTAGTAAGCATGGTGGGTTCCGCGCTCCAGATGGAGACTCAACCAGAGTGAGAGAGAGAGTGACATGGGGAGACCAGTGTTTCGAGAAA…	intergenic	gene-FTH1(dist=47293),gene-INCENP(dist=68721)
29	43144396	43145698	GGGCACCTGTTGGGGGCCAGAGTGAGGTACTCCGCCCGTGACAAAGGTCATGAGGAAGGAGGCTCGACATACGCAAAGGCGGGATCGAGCCTCAGGAGTCCCCCTGGAACTCCTCGAGCATCTACCCCCATAACCAGAGCCTGCCTACTTTACTACTTTGTGCTCACCTACACCTCTGACTTTACGGGGGGCTGTCCCCCACCACCTCTTTTGGAGAAGGAGTTAACTTAGAGCTCCAGTTTATAATAATTCCTGGGCGTGATAAGAGTGTTTTAACCTACAAACTCCTCTGAAGGTTCTCTAGCCTGCCTGACAGGCTCGTCTGGCCACATGTGATTGCTCACAGCCTCCCAACCGTGAGAGGCACAAGATGCTTTAAACCCTCTAAAAACGGGTTCT…	G	intergenic	gene-ATG2A(dist=5892),gene-PPP2R5B(dist=1332)
29	49705121	49705121	A	AAGACCGCTGCGGGGAGCGAGCTCCGCCTCTGGCAAAGGTCATGAGGAAGGAGGCTTGGCATACGCAAAGGTGGGATCAAGCCTCAGGAGTCTCCCTGGAAATTCTCGAGCAATCTACCCCCCAAACCAGAGTCTGCCTACTTTCTGCTTTGTGCTTTCACCTACACCTCTGACTTTACGGGGGGCTGTCCCCCACGACCTCTCTGAAAAAAGAGTTAGCTTACAGCTCCAGTTAATAATTCCTGGGTGTGACAGTGTTTAACCTACAAACTCCTTTGGAAATCCTCTAGCCTGCCTGAATAGGTTTTTCCGGCCACATGTGATTGTTCAGAGCCTCCCAACTGTGAGAGGCAGGAGATGTTCTAAACTGTCTAAACACAGATTCTTTTGAGTAGTTAA…	intergenic	gene-SYT8(dist=49627),gene-CTSD(dist=7562)
29	49922348	49923431	GGAGAACTGCCGGGAGCCGGCATATTGCATATTGAGTGCATATTGCATATTGAGTGCAGCACTTTTCAGGATCTGGAATAGCTCAACTGGAATTCTATCACTGCCGGTAGCCAGCGTGAGGAACTCCGCCCATGACAAAGGTCATGAGGAAGGAGGCTTGGCATACGCAAAGGCGGGATCAAGCCTCAGGAGTCTCCCTGGAAATTCTCGAGCAATCTACCCCCAAAACCAGAGTCTGCCTACTTTCTGCTTTGTGCTTTCACCTACACCTCTGACTTTACGGGGGGCTGTCCCCCACTACCTCTCTGAAAAAAGTTAGCTTACAGCTCCAGTTAATAATTCCTGGGTGTGACAGTGTTTAACCTACAAACTCCTTTGGAAATCCTCTAGCCTGCCTGA…	G	intergenic	gene-LOC112444885(dist=29280),gene-DUSP8(dist=41515)
X	52583338	52584561	CCTGCCGGGAGCCGGCATATTGCATATTGAGTGCATATTGCATATTGAGTGCAGCACTTTTCAGGATCTGGAATAGCTCAACTGGAAATTCTATCACTGCCGGTAGCCAGCGTGAGGAACTCCGCCCATGACAAAGGTCATGAGGAAGGAGGCTCGGCATACGCAAAGGCGGGATCGAGCTTCAGGAGTCCCCCTGGAAATTCTCGAGCATATACCCCCAAAACCAGAGTCTGCCTACTTTCTGCTTTGTGCTTTCACCTACACCTCTGACTTTACGGGGGGCTGTCCCCCACTACCTCTCTGAAAAAAGTTAGCTTACAGCTCCAGTTAATAATTCCTGGGTGTGACAGTGTTTAACCTACAAACTCCTTTGGAAATCCTCTAGCCTGCCTGAATAGG…	C	intergenic	NONE(dist=NONE),NONE(dist=NONE)
X	52583481	52583552	GGAAGGAGGCTCGGCATACGCAAAGGCGGGATCGAGCTTCAGGAGTCCCCCTGGAAATTCTCGAGCATATAC	GCT	intergenic	NONE(dist=NONE),NONE(dist=NONE)
X	52583660	52583711	TCCAGTTAATAATTCCTGGGTGTGACAGTGTTTAACCTACAAACTCCTTTGG	T	intergenic	NONE(dist=NONE),NONE(dist=NONE)
X	53205206	53206477	GAACCCCTGCCGGGAGCCGGCATATTGCATATTGAGTGCATATTGCATATTGAGTGCAGCACTTTTCAGGATCTGGAATAGCTCAACTGGAAATTCTATCACTGCCGGTAGCCAGCGTGAGGAACTCCGCCCATGACAAAGGTCATGAGGAAGGAGGCTCGGCATACGCAAAGGCGGGATCGAGCTTCAGGAGTCCCCCTGGAAATTCTCGAGCATATACCCCCAAAACCAGTCTGCCTACTTTCTGCTTTGTGCTTTCACCTACACCTCTGACTTTACGGGGGGCTGTCCCCCACTACCTCTCTGAAAAAAGTTAGCTTACAGCTCCAGTTAATAATTCCTGGGTGTGACAGTGTTTAACCTACAAACTCCTTTGGAAATCCTCTAGCCTGCCTGAAT…	G	intergenic	NONE(dist=NONE),NONE(dist=NONE)
X	57973539	57973539	T	TATAGAGTGCCGGGGTCCTGCCCCGGCTGATCCAGGGTATTCGAAGCGGGGACGGCGTCGGCGACCTATTTATTTAAATATTTTATCAAAGATAAAAAGAGTAATAGGATGAGGATAGCTCAGTAGGAAAATTCAGTGGAGAAAAGAGGCTGAGTAGCTTGGTTTACGCGGGAGACCAATAAAACTTCAAGACAAGAAGTTTACACCACTTACGTAGGCCGCAGGCGTCCTTCCGTTCTCCCGAAGGAGAGGAGACACTGAGGCCTCCCCGGTCGGATCTTAGAAGCCCAGGCATAATTAGTAAGCATGGTGGGTTCCGCGCTCCAGATGGAGACTCAACCAGAGTGAGAGAGAGAGCGACATGGGGAGACCAGTATTTCGAGAAACTGATCCCAATTC…	intergenic	NONE(dist=NONE),NONE(dist=NONE)
X	78475055	78475055	G	GGCCACCTGCCGGGGACCAGCCCCGGCTGATCCAGGGTATTCGAAGGAGAGACGGCATAGGCGAGGATCAGGATACGATAGCTTCAATTAGGTATTAATTAAAGATATAAAGAGTAATAGAATAAGGATAGCTCAGTAGGAAAATTCAGTGGAGAAAAGAGGCTGAGTAGCTTGGTTTACGCGGGAGACCAATAAAACTTCAAGACAAGAAGTTTGCACCACTTACGTAGGCCGCAGGCGTCCTTCCGTTCTCCCGAAGGAGAGGAGACACTGAGGCCTCCCCGGTCGGATCTTAGAAGCCCAGGCATAATTAGTAAGCATGGTGGGTTCCGCGCTCCAGATGGAGACTCAACCAGAGTGAGAGAGAGAGCGACATGGGGAGACCAGTATTTCGAGAAA…	intergenic	NONE(dist=NONE),NONE(dist=NONE)
X	107000000	106906589	T	TATATAATTGCCGGGGACCAGCCCCGGCTGAACCAGGGTATTCGAAGGAGAGACGGCGTAGGCGAAGATCAGGAAACAATTGCTTAATTAAACGTTAATTAAGGATATAAAGAGTAATAGAATGAGGATAGCTCAGTAGGAAAATTCAGTGGAGAAAAGAGGCTGAGATAAGGATAGCTCAGTGAGGAAATTCAGTGTAGAAAAGAGGCTGAATAATTCAGCCAGAAGGTAAGAGAAAGAACGACATGGTGAGACCAAGTTTCGGTGAACAAGGCCCGTACTTTATTTTTCAAAGTAGTTTTTATACCTTAAGTTATGCACAGAGGATAATGGGGGAAGGGGTAGAGTCTTGCAGCAAACCAGGCTTTCTTCCTGCAAACTTATCATATGCAAAAGCTT…	intergenic	NONE(dist=NONE),NONE(dist=NONE)
X	109000000	109255986	G	GGCTGAGTGTTGGGGGCCAGAGTGAGGTACTCCGCCCGTGACAAAGGTCATGAGGAAGGAGGCTCGACATACGCAAAGGCGGGATCGAGCCTCAGGAGTCCCCCTGGAACTCCTCGAGCATCTACCCCCATAACCAGAGCCTGCCTACTTTACTACTTTGTGCTCACCTACACCTCTGACTTTACGGGGGGCTGTCCCCCACCACCTCTTTTGGAGAAGGAGTTAACTTAGAGCTCCAGTTTATAATAATTCCTGGGCGTGATAAGAGTGTTTTAACCTACAAACTCCTCTGAAGGTTCTCTAGCCTGCCTGACAGGCTCGTCCGGCCACATGTGATTGCTCACAGCCTCCCAACCGTGAGAGGCACAAGATGCTTTAAACCCTCTAAAAACGGGTTCT…	intergenic	NONE(dist=NONE),NONE(dist=NONE)
X	109000000	109431729	TAAAGGCTGCCGGGGTCCTGCCCCGGCTGATCCAGGGTATTCGAAGCGGGGACGGCGTCGGCGACCTATTTATTTAAATATTTTATCAAAGATATAAAGAGTAATAGGATGAGGATAGCTCAGTAGGAAAATTCAGTGGAGAAAAGAGGCTGAGTAGCTTGGTTTACGCGGGAGACCAATAAAACTTCAAGACAAGAAGTTTGCACCACTTACGTAGGCCGCAGGCGTCCTTCCGTTCTCCCGAAGGAGAGGAGACACTGAGGCCTCCCCGGTCGGATCTTAGAAGCCCAGGCATAATTAGTAAGCATGGTGGGTTCCGCGCTCCAGATGGAGACTCAACCAGAGTGAGAGAGAGAGCGACATGGGGAGACCAGTATTTCGAGAAACTGATCCCAATTC…	T	intergenic	NONE(dist=NONE),NONE(dist=NONE)
X	109000000	109431287	TGGAGACTTAGCAACAAACATTGGCTCAACAAATGAAAAACCCTTCACCAATACAA	T	intergenic	NONE(dist=NONE),NONE(dist=NONE)
X	116000000	115930645	C	CTATATATATATGCGGGGAGCCGGTGAGGCATTCCACTCGTGACAAAGGTCATGAGGAAGGAGGCTCGGCATACGCAAAGGCGGGATCGAGCCTCAGGAGTCCCCCCGGATATTCTCGAGCATTTTCCCCCAAAAAACCAGAGTCTGCCTACTTTATTGCTTTGTGCTCTCACCTCTGACTTTACTGGGGGCTGTCCCCTACCACCATCTCGCTCTCTCTCTGTCAAAGAGTTAACTTACAGCTCCAATTAATAAAGTTCCTGGGCAATTAGGAGTGTTTAAATCCAAACCCCTCTGATGGCTCTCTAACTCGCCTGACAAGTTTACCCGGACTCCTGCAGCTATGCATACGATTGTTTACAGTCTCCCAGCCTCGAGAGGCATGGGAAGCTTAAGATA…	intergenic	NONE(dist=NONE),NONE(dist=NONE)
X	121000000	121046749	CATTTCCTGTTGGGGGCCAGAGTGAGGTACTCCGCCCGTGACAAAGGTCATGAGGAAGGAGGCTCGACATACGCAAAGGCGGGATCGAGCCTCAGGAGTCCCCCTGGAAATCCTCGAGCATCTACCCCCATAACCAGAGCCTGCCTACTTTACTACTTTGTGCTCACCTACACCTCTGACTTTACGGGGGGCTGTCCCCCACCACCTCTTTTGGAGAAGGAGTTAACTTAGAGCTCCAGTTTATAATAATTCCTGGGCGTGATAAGAGTGTTTTAACCTACAAACTCCTCTGAAGGTTCTCTGGCCTGCCTGACAGGCTTGTCCGGCCACATGTGATTGCTCACAGCCTCCCAACCGTGAGAAGCACAAGATGCTTTAAACCTTCTAAAAACAGGTTCC…	C	intergenic	NONE(dist=NONE),NONE(dist=NONE)
X	125000000	125423558	T	TCCAATGTGCATGCATACTGGGACTGAGTTACAGGCTTTAAAAGGTGAAAATGGCTCTGTCTTGCCACGCTGATTACCGGTGGATATGCGTGACATCTTTAAAGGTAAACGAGACAGATTATGAATGGGAAAAAATCAAAAAACATATCTCAGGTGTTTGCAACAGCTCTGACATTGGCCTGGACTTAGGGAAATTTCATAATCAAATACAGACCCTGGAACACTGTCGACTGGATTTTACCACCGCTGGAGCAGCTAATGACTTATTTCACACCTTCTCTAACTTTACTTCTGGAAAAAACATTCTGTCTAATATCTTTAGTTCTAATTTTGCTTCTCATAATCATTCTTCCTTGTATTGTCAGGATTCTTCGGCAGAACATTCAAAAGCTCGCGACT…	intergenic	NONE(dist=NONE),NONE(dist=NONE)
X	133000000	133287371	G	GGGTGCCTGCGGGGAGCCGGTGAGGCATTCCACTCGTGACAAAGGTCATGAGGAAGGAGGCTCGGCATACGCAAAGGCGGGATCGAGCCTCAGGAGTCCCCCCGGATATTCTCGAGCATTTTCCCCCAAAAAACCAGAGTCTGCCTACTTTATTGCTTTGTGCTCTCACCTCTGACTTTACTGGGGGCTGTCCCCTACCACCGTCTCTCTCTCTCTGTGTCAAAGAGTTAACTTACAGCTCCAATTAATAAAGTTCCTGGGCAATTAGGAGTGTTTAAATCCAAACCCCTCTGATGGCTCTCTAACTCGCCTGACAAGTTTACCCGGACTCCTGCAGCTATGCATACGATTGTTTACAGTCTCCCAGCCTCGAGAGGCATGGGAAGCTTAAGATATTCA…	intergenic	NONE(dist=NONE),NONE(dist=NONE)
X	133000000	133293352	GCTGGCATATTGAGTGCAGCACTTTCACAGCATCATCTTTCAGGATTTGAAATAGCTCAACTGGAATTCCATCACCTCCACTAGCTTTGTTCGTAGTGATGCTTCCTAAGGCCCACTTGACTTCACATTCCAGGATGTCTGGCTCTAGGT	G	intergenic	NONE(dist=NONE),NONE(dist=NONE)
X	135000000	134917867	GACTTAGTGCTGGGGACCAGCCCCAGCTGATCCAGGGTATTCGAAGGAGAGACGGCCTAGGCGACTATTTATATGCTAATTAGAGATATAGAGAACAATAGAATGAGGATAGCTCAGTAGGAAAATTCAGTGGAGAAAAGAAGCTGAGTAGCTTGGTTTACGCGGGAGACCAATAAAACTTCAAGACAAGAAGTTTGCACCACTTACGTAGGCCACAGGCGCCCTCTCGAATAACGGAAGGTGTCTCACCCTAGACTCCTTCTCGAGTGGGTCTTAGAAGCCCAGGCATAATTAGTAAGCGTGGTGGGTTCCGCGCTCCAGATGGAGACTCAGCTGGAAGTTAAAGGGAAGAATGACATGGGGAGACCAAGCGTTGGTGAACAAGGCCCATAGCTTTAT…	G	intergenic	NONE(dist=NONE),NONE(dist=NONE)
[truncated: 6 more rows]
