# Supplementary material
Source: HighWire-hosted journal article supplement (doi:10.1101/gr.281289.125)
Supplement: Supplemental_Table_S10.xlsx [file Supplemental_Table_S10.xlsx]

## Sheet: Table S10
Table S10: Genomic annotation and tissue specificity of TE-derived cis‑regulatory elements.
CREs_chr	CREs_start	CREs_end	Tissue	States	CREs	TE subfamilies	TE families	Location	Gene annotation
10	26577800	26578000	Cecum	TssA	Promoters	BTLTR1	LTR-ERVK	intergenic	gene-RNASE11(dist=65244),gene-RNASE10(dist=14770)
10	26577800	26578000	Lung	TssA	Promoters	BTLTR1	LTR-ERVK	intergenic	gene-RNASE11(dist=65244),gene-RNASE10(dist=14770)
14	531200	531400	Liver	TssA	Promoters	ERV2-1-I_BT	LTR-ERVK	intergenic	gene-VPS28(dist=18392),gene-SLC39A4(dist=2517)
14	531400	531800	Jejunum	TssA	Promoters	ERV2-1-I_BT	LTR-ERVK	intergenic	gene-VPS28(dist=18592),gene-SLC39A4(dist=2117)
14	532800	533000	Liver	TssA	Promoters	LTR2C_BT	LTR-ERVK	upstream	gene-SLC39A4
18	49461000	49461400	Abomasum	TssA	Promoters	BTLTR1E1	LTR-ERVK	intronic	gene-FCGBP
19	53411800	53412000	Abomasum	TssA	Promoters	LTR46_BT	LTR-ERVK	intergenic	gene-CANT1(dist=3974),gene-LGALS3BP(dist=4667)
19	53411800	53412000	Liver	TssA	Promoters	LTR46_BT	LTR-ERVK	intergenic	gene-CANT1(dist=3974),gene-LGALS3BP(dist=4667)
21	19629800	19630000	Colon	TssA	Promoters	ERV2-3-I_BT	LTR-ERVK	downstream	gene-LOC101903572
29	44420800	44421400	Ileum	TssA	Promoters	ERV2-1C-LTR_BT	LTR-ERVK	intergenic	gene-SLC29A2(dist=1854),gene-NPAS4(dist=42886)
29	44421600	44421800	Ileum	TssA	Promoters	ERV2-1C-LTR_BT	LTR-ERVK	intergenic	gene-SLC29A2(dist=2654),gene-NPAS4(dist=42486)
4	33998000	33998200	Liver	TssA	Promoters	LTR46_BT	LTR-ERVK	intergenic	gene-GRM3(dist=120040),gene-TRNAS-GGA-9(dist=63581)
5	117000000	117000000	Jejunum	TssA	Promoters	BTLTR1	LTR-ERVK	upstream	gene-GTSE1
6	84885600	84885800	Colon	TssA	Promoters	BTLTR1F	LTR-ERVK	intergenic	gene-LOC526979(dist=37898),gene-LOC781988(dist=63680)
6	105000000	105000000	Hypothalamus	TssA	Promoters	BTLTR1E	LTR-ERVK	intergenic	gene-SLC2A9(dist=32532),gene-WDR1(dist=33191)
6	105000000	105000000	Liver	TssA	Promoters	BTLTR1E	LTR-ERVK	intergenic	gene-SLC2A9(dist=32732),gene-WDR1(dist=32991)
7	100000000	100000000	Rumen	TssA	Promoters	BTLTR1B1	LTR-ERVK	intergenic	gene-ST8SIA4(dist=54644),gene-TRNAE-UUC-40(dist=1073479)
8	83086200	83086400	Ileum	TssA	Promoters	BTLTR1	LTR-ERVK	upstream	gene-SLC35D2
9	16753800	16754000	Ileum	TssA	Promoters	BTLTR1F	LTR-ERVK	intergenic	gene-IMPG1(dist=1031388),gene-HTR1B(dist=334667)
1	67109600	67109800	Rumen	TssAHet	Promoters	BTLTR1F	LTR-ERVK	intronic	gene-HSPBAP1
1	141000000	141000000	Duodenum	TssAHet	Promoters	BTLTR1	LTR-ERVK	intergenic	gene-DSCAM(dist=350325),gene-BACE2(dist=208596)
1	148000000	148000000	Jejunum	TssAHet	Promoters	BTLTR1J4	LTR-ERVK	intronic	gene-SETD4
10	39908400	39908600	Rumen	TssAHet	Promoters	BTLTR1B1	LTR-ERVK	intronic	gene-MDGA2
11	17859200	17859400	Rumen	TssAHet	Promoters	BTLTR1B1	LTR-ERVK	intergenic	gene-FAM98A(dist=1705329),gene-TRNAM-CAU-8(dist=709266)
13	59915000	59915400	Jejunum	TssAHet	Promoters	ERV2-1-I_BT	LTR-ERVK	intronic	gene-RAD21L1
13	59918000	59918200	Abomasum	TssAHet	Promoters	LTR46_BT	LTR-ERVK	UTR5	gene-RAD21L1
13	59918000	59918400	Lung	TssAHet	Promoters	LTR46_BT	LTR-ERVK	UTR5	gene-RAD21L1
13	72928200	72928400	Spleen	TssAHet	Promoters	ERV2-1B-LTR_BT	LTR-ERVK	intronic	gene-SERINC3
14	530600	531200	Liver	TssAHet	Promoters	ERV2-1-I_BT	LTR-ERVK	intergenic	gene-VPS28(dist=17792),gene-SLC39A4(dist=2717)
14	531800	532000	Jejunum	TssAHet	Promoters	ERV2-1-I_BT	LTR-ERVK	intergenic	gene-VPS28(dist=18992),gene-SLC39A4(dist=1917)
14	532800	533000	Colon	TssAHet	Promoters	LTR2C_BT	LTR-ERVK	upstream	gene-SLC39A4
14	532800	533000	Duodenum	TssAHet	Promoters	LTR2C_BT	LTR-ERVK	upstream	gene-SLC39A4
14	533600	533800	Duodenum	TssAHet	Promoters	LTR2C_BT	LTR-ERVK	upstream	gene-SLC39A4
15	57768400	57768600	Liver	TssAHet	Promoters	BTLTR1D2	LTR-ERVK	intronic	gene-BBOX1
16	65903600	65903800	Colon	TssAHet	Promoters	BTLTR1C	LTR-ERVK	intronic	gene-FAM129A
17	67340600	67340800	Cecum	TssAHet	Promoters	BTLTR1B1	LTR-ERVK	intronic	gene-LOC101903015
18	49461000	49461400	Lung	TssAHet	Promoters	BTLTR1E1	LTR-ERVK	intronic	gene-FCGBP
18	54746800	54748000	Liver	TssAHet	Promoters	ERV2-1-I_BT	LTR-ERVK	intronic	gene-SULT2A1
18	54748200	54749200	Liver	TssAHet	Promoters	BTLTR1F	LTR-ERVK	exonic	gene-SULT2A1
19	9608200	9608400	Lung	TssAHet	Promoters	ERV2-1-LTR_BT	LTR-ERVK	intronic	gene-TEX14
19	53411600	53412000	Ileum	TssAHet	Promoters	LTR46_BT	LTR-ERVK	intergenic	gene-CANT1(dist=3774),gene-LGALS3BP(dist=4667)
2	14080400	14080600	Cortex	TssAHet	Promoters	BTLTR1	LTR-ERVK	intronic	gene-PDE1A
21	67177000	67177600	Rumen	TssAHet	Promoters	ERV2-1C-LTR_BT	LTR-ERVK	intronic	gene-TECPR2
22	6787600	6788000	Abomasum	TssAHet	Promoters	BTLTR1E1	LTR-ERVK	intronic	gene-CMTM8
23	27948200	27948400	Ileum	TssAHet	Promoters	BTLTR1C	LTR-ERVK	UTR3	gene-BOLA-2
27	18200	18400	Hypothalamus	TssAHet	Promoters	BTLTR1D2	LTR-ERVK	intronic	gene-LOC100848264
28	29678200	29678600	Abomasum	TssAHet	Promoters	LTR46_BT	LTR-ERVK	upstream	gene-CHCHD1
29	41171000	41171200	Rumen	TssAHet	Promoters	BTLTR1B	LTR-ERVK	intronic	gene-SLC3A2
29	41172400	41172600	Duodenum	TssAHet	Promoters	ERV2-1-I_BT	LTR-ERVK	intronic	gene-SLC3A2
3	10699600	10700600	Spleen	TssAHet	Promoters	BTLTR1D2	LTR-ERVK	upstream	gene-IFI16
3	10700000	10700600	Adipose	TssAHet	Promoters	BTLTR1D2	LTR-ERVK	upstream	gene-IFI16
3	10700200	10700600	Lung	TssAHet	Promoters	BTLTR1D2	LTR-ERVK	upstream	gene-IFI16
3	86068000	86068200	Rumen	TssAHet	Promoters	BTLTR1B	LTR-ERVK	intronic	gene-CYP2J2
3	101000000	101000000	Abomasum	TssAHet	Promoters	BTLTR1	LTR-ERVK	intronic	gene-ARMH1
3	119000000	119000000	Colon	TssAHet	Promoters	ERV2-1-I_BT	LTR-ERVK	intronic	gene-NDUFA10
5	28802400	28802600	Spleen	TssAHet	Promoters	BTLTR1E1	LTR-ERVK	intergenic	gene-SLC11A2(dist=44424),gene-LOC512464(dist=43807)
5	100000000	100000000	Spleen	TssAHet	Promoters	ERV2-1C-LTR_BT	LTR-ERVK	intergenic	gene-LOC509972(dist=10179),gene-LOC784451(dist=4413)
5	100000000	100000000	Duodenum	TssAHet	Promoters	ERV2-1C-LTR_BT	LTR-ERVK	intergenic	gene-LOC509972(dist=10579),gene-LOC784451(dist=4413)
5	112000000	112000000	Cortex	TssAHet	Promoters	ERV2-1-LTR_BT	LTR-ERVK	intronic	gene-ADSL
5	112000000	112000000	Duodenum	TssAHet	Promoters	ERV2-1-LTR_BT	LTR-ERVK	intronic	gene-ADSL
5	112000000	112000000	Jejunum	TssAHet	Promoters	ERV2-1-LTR_BT	LTR-ERVK	intronic	gene-ADSL
6	25281600	25281800	Liver	TssAHet	Promoters	BTLTR1	LTR-ERVK	intronic	gene-ADH1C
6	84885600	84886000	Cecum	TssAHet	Promoters	BTLTR1F	LTR-ERVK	intergenic	gene-LOC526979(dist=37898),gene-LOC781988(dist=63480)
6	84885600	84886000	Duodenum	TssAHet	Promoters	BTLTR1F	LTR-ERVK	intergenic	gene-LOC526979(dist=37898),gene-LOC781988(dist=63480)
6	105000000	105000000	Hypothalamus	TssAHet	Promoters	BTLTR1E	LTR-ERVK	intergenic	gene-SLC2A9(dist=32332),gene-WDR1(dist=33391)
7	5048800	5049200	Ileum	TssAHet	Promoters	BTLTR1E	LTR-ERVK	intergenic	gene-MPV17L2(dist=21786),gene-IFI30(dist=5703)
7	9621400	9621600	Rumen	TssAHet	Promoters	BTLTR1B	LTR-ERVK	intergenic	gene-LOC100847301(dist=7109),gene-LOC788246(dist=12711)
7	15177400	15178400	Lung	TssAHet	Promoters	ERV2-1-I_BT	LTR-ERVK	intergenic	gene-ILF3(dist=9972),gene-QTRT1(dist=9813)
7	15177600	15178600	Abomasum	TssAHet	Promoters	ERV2-1-I_BT	LTR-ERVK	intergenic	gene-ILF3(dist=10172),gene-QTRT1(dist=9613)
7	15177800	15178400	Hypothalamus	TssAHet	Promoters	ERV2-1-I_BT	LTR-ERVK	intergenic	gene-ILF3(dist=10372),gene-QTRT1(dist=9813)
7	15177800	15178600	Spleen	TssAHet	Promoters	ERV2-1-I_BT	LTR-ERVK	intergenic	gene-ILF3(dist=10372),gene-QTRT1(dist=9613)
7	20826600	20827000	Ileum	TssAHet	Promoters	LTR7_BT	LTR-ERVK	exonic	gene-LOC789258
7	34293000	34293200	Lung	TssAHet	Promoters	ERV2-2-I_BT	LTR-ERVK	intronic	gene-HSD17B4
8	34782000	34782200	Ileum	TssAHet	Promoters	ERV2-3-I_BT	LTR-ERVK	intergenic	NONE(dist=NONE),gene-PTPRD(dist=1246446)
8	83086200	83086400	Jejunum	TssAHet	Promoters	BTLTR1	LTR-ERVK	upstream	gene-SLC35D2
9	12895000	12895200	Rumen	TssAHet	Promoters	ERV2-1-I_BT	LTR-ERVK	intergenic	gene-LOC104972961(dist=52647),gene-CGAS(dist=37176)
9	12895000	12895200	Spleen	TssAHet	Promoters	ERV2-1-I_BT	LTR-ERVK	intergenic	gene-LOC104972961(dist=52647),gene-CGAS(dist=37176)
9	16754000	16754200	Rumen	TssAHet	Promoters	BTLTR1F	LTR-ERVK	intergenic	gene-IMPG1(dist=1031588),gene-HTR1B(dist=334467)
X	74465800	74466000	Colon	TssAHet	Promoters	BTLTR1E1	LTR-ERVK	intronic	gene-ATP7A
10	26756600	26757000	Lung	EnhA	Enhancers	ERV2-1-I_BT	LTR-ERVK	intergenic	gene-TEP1(dist=8019),gene-PARP2(dist=7155)
10	50780600	50781000	Abomasum	EnhA	Enhancers	BTLTR1B	LTR-ERVK	intergenic	gene-GCNT3(dist=140840),gene-FAM81A(dist=25154)
11	43480000	43480200	Lung	EnhA	Enhancers	ERV2-3-I_BT	LTR-ERVK	intergenic	gene-LOC107132928(dist=3466),gene-PAPOLG(dist=33826)
12	73139400	73139600	Lung	EnhA	Enhancers	ERV2-1B-LTR_BT	LTR-ERVK	intronic	gene-DNAJC3
12	84489200	84489400	Ileum	EnhA	Enhancers	BTLTR1	LTR-ERVK	intergenic	gene-MYO16(dist=189665),gene-IRS2(dist=135680)
15	51406000	51406600	Cecum	EnhA	Enhancers	ERV2-1C-LTR_BT	LTR-ERVK	exonic	gene-LOC100336836
15	51406000	51406800	Ileum	EnhA	Enhancers	ERV2-1C-LTR_BT	LTR-ERVK	exonic	gene-LOC100336836
15	62886200	62886400	Cecum	EnhA	Enhancers	BTLTR1	LTR-ERVK	intronic	gene-LOC614914
16	3753600	3753800	Cecum	EnhA	Enhancers	BTLTR1	LTR-ERVK	intronic	gene-RAB7B
18	1885600	1885800	Jejunum	EnhA	Enhancers	BTLTR1E	LTR-ERVK	intronic	gene-PDPR
2	106000000	106000000	Hypothalamus	EnhA	Enhancers	ERV2-1-LTR_BT	LTR-ERVK	intronic	gene-PNKD
2	130000000	130000000	Abomasum	EnhA	Enhancers	BTLTR1F	LTR-ERVK	intronic	gene-ZBTB40
20	71940600	71941000	Abomasum	EnhA	Enhancers	LTR3_BT	LTR-ERVK	intergenic	gene-LOC101906441(dist=9124),gene-LOC524810(dist=2725)
21	19629400	19630200	Adipose	EnhA	Enhancers	ERV2-3-I_BT	LTR-ERVK	exonic	gene-LOC101903572
21	68264800	68265000	Abomasum	EnhA	Enhancers	ERV2-1B-LTR_BT	LTR-ERVK	intronic	gene-KLC1
25	26112600	26112800	Lung	EnhA	Enhancers	ERV2-3-I_BT	LTR-ERVK	intronic	gene-SGF29
25	36426600	36427000	Abomasum	EnhA	Enhancers	LTR7_BT	LTR-ERVK	intergenic	gene-ZKSCAN1(dist=7742),gene-AZGP1(dist=18776)
25	36430600	36430800	Abomasum	EnhA	Enhancers	LTR7_BT	LTR-ERVK	intergenic	gene-ZKSCAN1(dist=11742),gene-AZGP1(dist=14976)
29	50928600	50929000	Abomasum	EnhA	Enhancers	ERV2-1-I_BT	LTR-ERVK	intergenic	gene-B4GALNT4(dist=19410),gene-IFITM3(dist=1482)
29	50928600	50929000	Cecum	EnhA	Enhancers	ERV2-1-I_BT	LTR-ERVK	intergenic	gene-B4GALNT4(dist=19410),gene-IFITM3(dist=1482)
29	50928800	50929000	Liver	EnhA	Enhancers	ERV2-1-I_BT	LTR-ERVK	intergenic	gene-B4GALNT4(dist=19610),gene-IFITM3(dist=1482)
29	50928800	50929000	Lung	EnhA	Enhancers	ERV2-1-I_BT	LTR-ERVK	intergenic	gene-B4GALNT4(dist=19610),gene-IFITM3(dist=1482)
4	119000000	119000000	Ileum	EnhA	Enhancers	BTLTR1	LTR-ERVK	intergenic	gene-UBE3C(dist=35832),gene-DNAJB6(dist=11473)
6	105000000	105000000	Lung	EnhA	Enhancers	BTLTR1E	LTR-ERVK	intergenic	gene-SLC2A9(dist=32132),gene-WDR1(dist=33591)
6	105000000	105000000	Liver	EnhA	Enhancers	BTLTR1E	LTR-ERVK	intergenic	gene-SLC2A9(dist=32532),gene-WDR1(dist=33191)
6	105000000	105000000	Lung	EnhA	Enhancers	BTLTR1E	LTR-ERVK	intergenic	gene-SLC2A9(dist=32532),gene-WDR1(dist=33191)
6	105000000	105000000	Colon	EnhA	Enhancers	BTLTR1E	LTR-ERVK	intergenic	gene-SLC2A9(dist=32532),gene-WDR1(dist=32991)
6	105000000	105000000	Jejunum	EnhA	Enhancers	BTLTR1E	LTR-ERVK	intergenic	gene-SLC2A9(dist=32532),gene-WDR1(dist=32991)
6	105000000	105000000	Cecum	EnhA	Enhancers	BTLTR1E	LTR-ERVK	intergenic	gene-SLC2A9(dist=32532),gene-WDR1(dist=32791)
7	15177400	15177600	Cecum	EnhA	Enhancers	ERV2-1-I_BT	LTR-ERVK	intergenic	gene-ILF3(dist=9972),gene-QTRT1(dist=10613)
7	15177400	15177800	Ileum	EnhA	Enhancers	ERV2-1-I_BT	LTR-ERVK	intergenic	gene-ILF3(dist=9972),gene-QTRT1(dist=10413)
7	62721200	62721400	Abomasum	EnhA	Enhancers	ERV2-1-I_BT	LTR-ERVK	exonic	gene-BERV-K1
8	74619400	74619600	Jejunum	EnhA	Enhancers	BTLTR1E3	LTR-ERVK	intronic	gene-EPHX2
9	101000000	101000000	Ileum	EnhA	Enhancers	BTLTR1	LTR-ERVK	intergenic	gene-MPC1(dist=18188),gene-RPS6KA2(dist=4603)
X	59755200	59756400	Colon	EnhA	Enhancers	ERV2-3-I_BT	LTR-ERVK	intronic	gene-DCX
1	42905200	42905400	Colon	EnhAMe	Enhancers	ERV2-1B-LTR_BT	LTR-ERVK	intergenic	gene-CPOX(dist=3786),gene-ST3GAL6(dist=118447)
1	42985000	42985200	Rumen	EnhAMe	Enhancers	ERV2-3-LTR_BT	LTR-ERVK	intergenic	gene-CPOX(dist=83586),gene-ST3GAL6(dist=38647)
1	69370200	69370400	Jejunum	EnhAMe	Enhancers	BTLTR1F	LTR-ERVK	intergenic	gene-MUC13(dist=12726),gene-HEG1(dist=47550)
1	74351200	74351600	Jejunum	EnhAMe	Enhancers	LTR46_BT	LTR-ERVK	intergenic	gene-HRASLS(dist=167718),gene-MB21D2(dist=137423)
1	83211600	83211800	Colon	EnhAMe	Enhancers	BTLTR1E2	LTR-ERVK	intergenic	gene-ABCC5(dist=6368),gene-LOC782787(dist=13557)
1	122000000	122000000	Abomasum	EnhAMe	Enhancers	BTLTR1F	LTR-ERVK	intergenic	gene-PLSCR5(dist=3018),gene-PLSCR2(dist=64275)
1	122000000	122000000	Jejunum	EnhAMe	Enhancers	BTLTR1F	LTR-ERVK	intronic	gene-PLSCR2
1	122000000	122000000	Lung	EnhAMe	Enhancers	BTLTR1F	LTR-ERVK	intronic	gene-PLSCR2
1	122000000	122000000	Jejunum	EnhAMe	Enhancers	BTLTR1F	LTR-ERVK	intronic	gene-PLSCR2
1	140000000	140000000	Liver	EnhAMe	Enhancers	LTR3_BT	LTR-ERVK	intronic	gene-B3GALT5
1	140000000	140000000	Colon	EnhAMe	Enhancers	LTR3_BT	LTR-ERVK	intronic	gene-B3GALT5
1	145000000	145000000	Jejunum	EnhAMe	Enhancers	BTLTR1E1	LTR-ERVK	intronic	gene-PTTG1IP
1	145000000	145000000	Colon	EnhAMe	Enhancers	BTLTR1E1	LTR-ERVK	intronic	gene-PTTG1IP
1	146000000	146000000	Rumen	EnhAMe	Enhancers	LTR2B_BT	LTR-ERVK	intergenic	gene-PRMT2(dist=129932),gene-FBXO25(dist=52686)
10	4324800	4325000	Jejunum	EnhAMe	Enhancers	BTLTR1	LTR-ERVK	intergenic	gene-CCDC112(dist=7192),gene-FEM1C(dist=33172)
10	6640000	6640200	Colon	EnhAMe	Enhancers	BTLTR1B	LTR-ERVK	intronic	gene-ANKRD31
10	6640000	6640200	Jejunum	EnhAMe	Enhancers	BTLTR1B	LTR-ERVK	intronic	gene-ANKRD31
10	11328400	11328800	Jejunum	EnhAMe	Enhancers	ERV2-1-LTR_BT	LTR-ERVK	intergenic	gene-SERINC5(dist=111580),NONE(dist=NONE)
10	11328600	11328800	Cecum	EnhAMe	Enhancers	ERV2-1-LTR_BT	LTR-ERVK	intergenic	gene-SERINC5(dist=111780),NONE(dist=NONE)
10	23011200	23011800	Lung	EnhAMe	Enhancers	LTR2_BT	LTR-ERVK	intronic	gene-LOC100336282
10	23562400	23562600	Lung	EnhAMe	Enhancers	ERV2-1C-LTR_BT	LTR-ERVK	intergenic	gene-LOC104970758(dist=19883),gene-LOC112448413(dist=24556)
10	26128400	26128800	Lung	EnhAMe	Enhancers	BTLTR1C	LTR-ERVK	intergenic	gene-METTL17(dist=3183),gene-RNASE2(dist=42042)
10	26294800	26295000	Cecum	EnhAMe	Enhancers	BTLTR1J4	LTR-ERVK	ncRNA_intronic	gene-LOC783225
10	26294800	26295000	Ileum	EnhAMe	Enhancers	BTLTR1J4	LTR-ERVK	ncRNA_intronic	gene-LOC783225
10	26577800	26578000	Adipose	EnhAMe	Enhancers	BTLTR1	LTR-ERVK	intergenic	gene-RNASE11(dist=65244),gene-RNASE10(dist=14770)
10	26577800	26578000	Jejunum	EnhAMe	Enhancers	BTLTR1	LTR-ERVK	intergenic	gene-RNASE11(dist=65244),gene-RNASE10(dist=14770)
10	26577800	26578000	Liver	EnhAMe	Enhancers	BTLTR1	LTR-ERVK	intergenic	gene-RNASE11(dist=65244),gene-RNASE10(dist=14770)
10	26755400	26755600	Colon	EnhAMe	Enhancers	ERV2-1-I_BT	LTR-ERVK	intergenic	gene-TEP1(dist=6819),gene-PARP2(dist=8555)
10	26756600	26756800	Cecum	EnhAMe	Enhancers	ERV2-1-I_BT	LTR-ERVK	intergenic	gene-TEP1(dist=8019),gene-PARP2(dist=7355)
10	26757600	26758000	Colon	EnhAMe	Enhancers	ERV2-1-I_BT	LTR-ERVK	intergenic	gene-TEP1(dist=9019),gene-PARP2(dist=6155)
10	26757600	26758000	Spleen	EnhAMe	Enhancers	ERV2-1-I_BT	LTR-ERVK	intergenic	gene-TEP1(dist=9019),gene-PARP2(dist=6155)
10	26759400	26759800	Cecum	EnhAMe	Enhancers	ERV2-1-I_BT	LTR-ERVK	intergenic	gene-TEP1(dist=10819),gene-PARP2(dist=4355)
10	26760200	26760400	Lung	EnhAMe	Enhancers	ERV2-1-I_BT	LTR-ERVK	intergenic	gene-TEP1(dist=11619),gene-PARP2(dist=3755)
10	26760200	26761000	Colon	EnhAMe	Enhancers	ERV2-1-I_BT	LTR-ERVK	intergenic	gene-TEP1(dist=11619),gene-PARP2(dist=3155)
10	26760400	26761000	Cecum	EnhAMe	Enhancers	ERV2-1-I_BT	LTR-ERVK	intergenic	gene-TEP1(dist=11819),gene-PARP2(dist=3155)
10	26760400	26761000	Ileum	EnhAMe	Enhancers	ERV2-1-I_BT	LTR-ERVK	intergenic	gene-TEP1(dist=11819),gene-PARP2(dist=3155)
10	26760400	26761000	Jejunum	EnhAMe	Enhancers	ERV2-1-I_BT	LTR-ERVK	intergenic	gene-TEP1(dist=11819),gene-PARP2(dist=3155)
10	26760600	26760800	Lung	EnhAMe	Enhancers	ERV2-1-I_BT	LTR-ERVK	intergenic	gene-TEP1(dist=12019),gene-PARP2(dist=3355)
10	39282000	39282400	Abomasum	EnhAMe	Enhancers	ERV2-1C-LTR_BT	LTR-ERVK	intergenic	gene-EPB42(dist=857656),gene-RPL10L(dist=365303)
10	39282000	39282400	Colon	EnhAMe	Enhancers	ERV2-1C-LTR_BT	LTR-ERVK	intergenic	gene-EPB42(dist=857656),gene-RPL10L(dist=365303)
10	39282200	39282400	Duodenum	EnhAMe	Enhancers	ERV2-1C-LTR_BT	LTR-ERVK	intergenic	gene-EPB42(dist=857856),gene-RPL10L(dist=365303)
10	39282200	39282400	Lung	EnhAMe	Enhancers	ERV2-1C-LTR_BT	LTR-ERVK	intergenic	gene-EPB42(dist=857856),gene-RPL10L(dist=365303)
10	55149000	55149400	Lung	EnhAMe	Enhancers	BTLTR1B1	LTR-ERVK	intergenic	gene-RSL24D1(dist=35584),gene-UNC13C(dist=486137)
10	68041600	68041800	Colon	EnhAMe	Enhancers	BTLTR1	LTR-ERVK	intronic	gene-KTN1
10	76506200	76506400	Cecum	EnhAMe	Enhancers	BTLTR1C	LTR-ERVK	intergenic	gene-ESR2(dist=46051),gene-LOC100297513(dist=1375)
10	76506200	76506400	Colon	EnhAMe	Enhancers	BTLTR1C	LTR-ERVK	intergenic	gene-ESR2(dist=46051),gene-LOC100297513(dist=1375)
10	78523400	78523800	Lung	EnhAMe	Enhancers	BTLTR1B	LTR-ERVK	intergenic	gene-TRNAR-CCU-10(dist=393602),gene-CCDC196(dist=11750)
10	81138800	81140200	Ileum	EnhAMe	Enhancers	BTLTR1	LTR-ERVK	intronic	gene-GALNT16
10	103000000	103000000	Ileum	EnhAMe	Enhancers	BTLTR1	LTR-ERVK	intronic	gene-RPS6KA5
11	3640600	3640800	Lung	EnhAMe	Enhancers	ERV2-1C-LTR_BT	LTR-ERVK	intergenic	gene-CNGA3(dist=18288),gene-INPP4A(dist=10202)
11	10008800	10009200	Liver	EnhAMe	Enhancers	ERV2-2B_BT-LTR	LTR-ERVK	intronic	gene-M1AP
11	14853200	14853400	Jejunum	EnhAMe	Enhancers	LTR3_BT	LTR-ERVK	intronic	gene-NLRC4
11	21297800	21298000	Abomasum	EnhAMe	Enhancers	BTLTR1B	LTR-ERVK	intergenic	gene-ARHGEF33(dist=1017),gene-SOS1(dist=5806)
11	30127800	30128400	Colon	EnhAMe	Enhancers	LTR2C_BT	LTR-ERVK	intronic	gene-MSH6
11	43478600	43478800	Lung	EnhAMe	Enhancers	ERV2-3-I_BT	LTR-ERVK	intergenic	gene-LOC107132928(dist=2066),gene-PAPOLG(dist=35226)
11	47192600	47193200	Colon	EnhAMe	Enhancers	ERV2-1B-LTR_BT	LTR-ERVK	intergenic	gene-PAX8(dist=211329),gene-LOC112448784(dist=24935)
11	47192800	47193000	Lung	EnhAMe	Enhancers	ERV2-1B-LTR_BT	LTR-ERVK	intergenic	gene-PAX8(dist=211529),gene-LOC112448784(dist=25135)
11	47192800	47193200	Cecum	EnhAMe	Enhancers	ERV2-1B-LTR_BT	LTR-ERVK	intergenic	gene-PAX8(dist=211529),gene-LOC112448784(dist=24935)
11	48160200	48161000	Cecum	EnhAMe	Enhancers	ERV2-1B-LTR_BT	LTR-ERVK	intronic	gene-RMND5A
11	48160200	48161000	Colon	EnhAMe	Enhancers	ERV2-1B-LTR_BT	LTR-ERVK	intronic	gene-RMND5A
11	49580000	49580200	Jejunum	EnhAMe	Enhancers	ERV2-1-LTR_BT	LTR-ERVK	intergenic	gene-SH2D6(dist=15208),gene-CAPG(dist=7662)
11	60764600	60764800	Lung	EnhAMe	Enhancers	BTLTR1	LTR-ERVK	intergenic	gene-B3GNT2(dist=8060),gene-TMEM17(dist=238938)
11	66676600	66676800	Abomasum	EnhAMe	Enhancers	BTLTR1B	LTR-ERVK	intergenic	gene-PPP3R1(dist=9161),gene-CNRIP1(dist=26101)
11	66676600	66676800	Colon	EnhAMe	Enhancers	BTLTR1B	LTR-ERVK	intergenic	gene-PPP3R1(dist=9161),gene-CNRIP1(dist=26101)
11	66776400	66777400	Liver	EnhAMe	Enhancers	LTR7_BT	LTR-ERVK	intergenic	gene-CNRIP1(dist=46885),gene-PLEK(dist=10238)
11	84281000	84281200	Colon	EnhAMe	Enhancers	LTR3_BT	LTR-ERVK	intergenic	gene-LOC782101(dist=189258),gene-TRIB2(dist=955900)
11	84586000	84586200	Jejunum	EnhAMe	Enhancers	ERV2-2B_BT-I	LTR-ERVK	intergenic	gene-LOC782101(dist=494258),gene-TRIB2(dist=650900)
11	84586000	84586800	Cecum	EnhAMe	Enhancers	ERV2-2B_BT-I	LTR-ERVK	intergenic	gene-LOC782101(dist=494258),gene-TRIB2(dist=650300)
11	98767000	98767200	Jejunum	EnhAMe	Enhancers	BTLTR1F	LTR-ERVK	intergenic	gene-PTGES2(dist=2950),gene-LCN2(dist=14519)
11	104000000	104000000	Abomasum	EnhAMe	Enhancers	ERV2-1C-LTR_BT	LTR-ERVK	intronic	gene-ABO
12	1430800	1431000	Jejunum	EnhAMe	Enhancers	LTR46_BT	LTR-ERVK	intergenic	gene-PCDH20(dist=949926),gene-TDRD3(dist=144111)
12	1431400	1431800	Jejunum	EnhAMe	Enhancers	LTR46_BT	LTR-ERVK	intergenic	gene-PCDH20(dist=950526),gene-TDRD3(dist=143311)
12	29593400	29594000	Abomasum	EnhAMe	Enhancers	ERV2-1C-LTR_BT	LTR-ERVK	intronic	gene-LOC788183
12	29593400	29594000	Ileum	EnhAMe	Enhancers	ERV2-1C-LTR_BT	LTR-ERVK	intronic	gene-LOC788183
12	29593400	29594400	Cecum	EnhAMe	Enhancers	ERV2-1C-LTR_BT	LTR-ERVK	intronic	gene-LOC788183
12	29593400	29594600	Jejunum	EnhAMe	Enhancers	ERV2-1C-LTR_BT	LTR-ERVK	intronic	gene-LOC788183
12	29593600	29593800	Duodenum	EnhAMe	Enhancers	ERV2-1C-LTR_BT	LTR-ERVK	intronic	gene-LOC788183
12	29593600	29594400	Lung	EnhAMe	Enhancers	ERV2-1C-LTR_BT	LTR-ERVK	intronic	gene-LOC788183
12	37258600	37259600	Colon	EnhAMe	Enhancers	ERV2-1C-LTR_BT	LTR-ERVK	intergenic	gene-ATP12A(dist=594414),gene-LOC781692(dist=138035)
12	37258800	37259400	Duodenum	EnhAMe	Enhancers	ERV2-1C-LTR_BT	LTR-ERVK	intergenic	gene-ATP12A(dist=594614),gene-LOC781692(dist=138235)
12	60920600	60921200	Abomasum	EnhAMe	Enhancers	ERV2-1C-LTR_BT	LTR-ERVK	intergenic	gene-SLITRK6(dist=218408),gene-SLITRK5(dist=1371400)
12	60920600	60921200	Cecum	EnhAMe	Enhancers	ERV2-1C-LTR_BT	LTR-ERVK	intergenic	gene-SLITRK6(dist=218408),gene-SLITRK5(dist=1371400)
12	60920600	60921200	Colon	EnhAMe	Enhancers	ERV2-1C-LTR_BT	LTR-ERVK	intergenic	gene-SLITRK6(dist=218408),gene-SLITRK5(dist=1371400)
12	86332400	86332600	Cecum	EnhAMe	Enhancers	ERV2-1-LTR_BT	LTR-ERVK	intronic	gene-ATP11A
12	86332400	86332600	Colon	EnhAMe	Enhancers	ERV2-1-LTR_BT	LTR-ERVK	intronic	gene-ATP11A
12	86332400	86332600	Lung	EnhAMe	Enhancers	ERV2-1-LTR_BT	LTR-ERVK	intronic	gene-ATP11A
13	3166800	3167000	Lung	EnhAMe	Enhancers	BTLTR1C	LTR-ERVK	intergenic	gene-PAK5(dist=177885),gene-ANKEF1(dist=85145)
13	10340600	10340800	Jejunum	EnhAMe	Enhancers	BTLTR1	LTR-ERVK	intronic	gene-KIF16B
13	20577400	20578200	Jejunum	EnhAMe	Enhancers	BTLTR1E2	LTR-ERVK	intergenic	gene-ARL5B(dist=236681),gene-MALRD1(dist=69984)
13	43390400	43390600	Duodenum	EnhAMe	Enhancers	BTLTR1B1	LTR-ERVK	intronic	gene-LOC782061
13	43635600	43636000	Cecum	EnhAMe	Enhancers	ERV2-2B_BT-LTR	LTR-ERVK	intergenic	gene-AKR1C4(dist=8769),gene-LOC527068(dist=7175)
13	43639800	43640000	Jejunum	EnhAMe	Enhancers	BTLTR1	LTR-ERVK	intergenic	gene-AKR1C4(dist=12969),gene-LOC527068(dist=3175)
13	43837200	43837400	Lung	EnhAMe	Enhancers	BTLTR1J	LTR-ERVK	intergenic	gene-20ALPHA-HSD(dist=15609),gene-LOC112441521(dist=11676)
13	59910400	59910600	Liver	EnhAMe	Enhancers	LTR46_BT	LTR-ERVK	UTR5	gene-RAD21L1
13	59918200	59918400	Jejunum	EnhAMe	Enhancers	LTR46_BT	LTR-ERVK	UTR5	gene-RAD21L1
13	72928200	72928400	Colon	EnhAMe	Enhancers	ERV2-1B-LTR_BT	LTR-ERVK	intronic	gene-SERINC3
13	72928200	72928400	Jejunum	EnhAMe	Enhancers	ERV2-1B-LTR_BT	LTR-ERVK	intronic	gene-SERINC3
14	531000	531200	Jejunum	EnhAMe	Enhancers	ERV2-1-I_BT	LTR-ERVK	intergenic	gene-VPS28(dist=18192),gene-SLC39A4(dist=2717)
14	531000	531600	Colon	EnhAMe	Enhancers	ERV2-1-I_BT	LTR-ERVK	intergenic	gene-VPS28(dist=18192),gene-SLC39A4(dist=2317)
14	531200	531400	Ileum	EnhAMe	Enhancers	ERV2-1-I_BT	LTR-ERVK	intergenic	gene-VPS28(dist=18392),gene-SLC39A4(dist=2517)
14	531400	531800	Liver	EnhAMe	Enhancers	ERV2-1-I_BT	LTR-ERVK	intergenic	gene-VPS28(dist=18592),gene-SLC39A4(dist=2117)
14	533600	533800	Ileum	EnhAMe	Enhancers	LTR2C_BT	LTR-ERVK	upstream	gene-SLC39A4
14	9535200	9535400	Rumen	EnhAMe	Enhancers	BTLTR1B1	LTR-ERVK	intergenic	gene-EFR3A(dist=381183),gene-ADCY8(dist=218790)
15	881600	882600	Colon	EnhAMe	Enhancers	BTLTR1F	LTR-ERVK	downstream	gene-LOC515790
15	881800	882200	Abomasum	EnhAMe	Enhancers	BTLTR1F	LTR-ERVK	intergenic	gene-LOC532486(dist=116454),gene-LOC515790(dist=1112)
15	3211800	3212200	Cecum	EnhAMe	Enhancers	BTLTR1C	LTR-ERVK	intergenic	gene-GRIA4(dist=714472),gene-CASP1(dist=20747)
15	3211800	3212200	Colon	EnhAMe	Enhancers	BTLTR1C	LTR-ERVK	intergenic	gene-GRIA4(dist=714472),gene-CASP1(dist=20747)
15	3211800	3212400	Jejunum	EnhAMe	Enhancers	BTLTR1C	LTR-ERVK	intergenic	gene-GRIA4(dist=714472),gene-CASP1(dist=20547)
15	16416400	16416800	Lung	EnhAMe	Enhancers	ERV2-1C-LTR_BT	LTR-ERVK	intronic	gene-GUCY1A2
15	17688000	17688200	Liver	EnhAMe	Enhancers	LTR46_BT	LTR-ERVK	intronic	gene-CUL5
15	42104200	42104400	Liver	EnhAMe	Enhancers	ERV2-1B-LTR_BT	LTR-ERVK	intronic	gene-LYVE1
15	46805200	46805400	Jejunum	EnhAMe	Enhancers	BTLTR1	LTR-ERVK	intronic	gene-FAM160A2
15	50374000	50374400	Lung	EnhAMe	Enhancers	BTLTR1F	LTR-ERVK	intergenic	gene-LOC526621(dist=3693),gene-LOC112441493(dist=6468)
15	51404600	51406600	Colon	EnhAMe	Enhancers	ERV2-1C-LTR_BT	LTR-ERVK	exonic	gene-LOC100336836
15	51404800	51405200	Duodenum	EnhAMe	Enhancers	ERV2-1C-LTR_BT	LTR-ERVK	exonic	gene-LOC100336836
15	51404800	51405400	Abomasum	EnhAMe	Enhancers	ERV2-1C-LTR_BT	LTR-ERVK	exonic	gene-LOC100336836
15	51404800	51406000	Cecum	EnhAMe	Enhancers	ERV2-1C-LTR_BT	LTR-ERVK	exonic	gene-LOC100336836
15	51405000	51405400	Lung	EnhAMe	Enhancers	ERV2-1C-LTR_BT	LTR-ERVK	intronic	gene-LOC100336836
15	51405200	51406200	Jejunum	EnhAMe	Enhancers	ERV2-1C-LTR_BT	LTR-ERVK	intronic	gene-LOC100336836
15	51405800	51406000	Ileum	EnhAMe	Enhancers	ERV2-1C-LTR_BT	LTR-ERVK	intronic	gene-LOC100336836
15	56436000	56436600	Jejunum	EnhAMe	Enhancers	ERV2-2B_BT-I	LTR-ERVK	intronic	gene-B3GNT6
15	56436200	56436600	Colon	EnhAMe	Enhancers	ERV2-2B_BT-I	LTR-ERVK	intronic	gene-B3GNT6
15	56441000	56441200	Jejunum	EnhAMe	Enhancers	ERV2-2B_BT-I	LTR-ERVK	intronic	gene-B3GNT6
15	57411200	57411400	Jejunum	EnhAMe	Enhancers	LTR2_BT	LTR-ERVK	intronic	gene-SLC5A12
15	69859600	69859800	Abomasum	EnhAMe	Enhancers	ERV2-1-LTR_BT	LTR-ERVK	intergenic	NONE(dist=NONE),gene-LRRC4C(dist=538130)
15	80605000	80605200	Rumen	EnhAMe	Enhancers	BTLTR1B1	LTR-ERVK	intergenic	gene-LOC781990(dist=3813),gene-PRG3-2(dist=11824)
15	83437200	83437600	Ileum	EnhAMe	Enhancers	LTR3_BT	LTR-ERVK	UTR3	gene-LOC101908134
15	84213200	84214200	Colon	EnhAMe	Enhancers	ERV2-1-I_BT	LTR-ERVK	intergenic	gene-OR4A15(dist=56632),gene-LOC104970693(dist=2260)
15	84213400	84213800	Abomasum	EnhAMe	Enhancers	ERV2-1-I_BT	LTR-ERVK	intergenic	gene-OR4A15(dist=56832),gene-LOC104970693(dist=2660)
15	84213400	84213800	Cecum	EnhAMe	Enhancers	ERV2-1-I_BT	LTR-ERVK	intergenic	gene-OR4A15(dist=56832),gene-LOC104970693(dist=2660)
15	84213400	84214000	Jejunum	EnhAMe	Enhancers	ERV2-1-I_BT	LTR-ERVK	intergenic	gene-OR4A15(dist=56832),gene-LOC104970693(dist=2460)
15	84213400	84214200	Lung	EnhAMe	Enhancers	ERV2-1-I_BT	LTR-ERVK	intergenic	gene-OR4A15(dist=56832),gene-LOC104970693(dist=2260)
15	84213800	84214000	Ileum	EnhAMe	Enhancers	ERV2-1-I_BT	LTR-ERVK	intergenic	gene-OR4A15(dist=57232),gene-LOC104970693(dist=2460)
15	84214600	84214800	Colon	EnhAMe	Enhancers	ERV2-1-I_BT	LTR-ERVK	intergenic	gene-OR4A15(dist=58032),gene-LOC104970693(dist=1660)
15	84217000	84217600	Jejunum	EnhAMe	Enhancers	ERV2-1-I_BT	LTR-ERVK	exonic	gene-LOC104970693
15	84217400	84217600	Cecum	EnhAMe	Enhancers	ERV2-1-I_BT	LTR-ERVK	upstream	gene-LOC104970693
15	84217400	84217800	Colon	EnhAMe	Enhancers	ERV2-1-I_BT	LTR-ERVK	upstream	gene-LOC104970693
15	84291600	84292200	Cecum	EnhAMe	Enhancers	ERV2-1C-LTR_BT	LTR-ERVK	intergenic	gene-OR4C6(dist=58643),gene-LOC112441559(dist=6125)
16	5116600	5116800	Lung	EnhAMe	Enhancers	BTLTR1B1	LTR-ERVK	intergenic	gene-LOC510860(dist=17890),gene-LOC515150(dist=25471)
16	16606400	16606600	Duodenum	EnhAMe	Enhancers	LTR46_BT	LTR-ERVK	intergenic	gene-BRINP3(dist=975261),gene-LOC529930(dist=994395)
16	23564600	23565000	Abomasum	EnhAMe	Enhancers	ERV2-1C-LTR_BT	LTR-ERVK	intronic	gene-BPNT1
16	24231000	24231200	Lung	EnhAMe	Enhancers	BTLTR1C	LTR-ERVK	intronic	gene-MARC2
16	36399600	36400200	Duodenum	EnhAMe	Enhancers	ERV2-3-I_BT	LTR-ERVK	intergenic	gene-DPT(dist=65783),gene-TRNAC-ACA-74(dist=25123)
16	36399800	36400000	Ileum	EnhAMe	Enhancers	ERV2-3-I_BT	LTR-ERVK	intergenic	gene-DPT(dist=65983),gene-TRNAC-ACA-74(dist=25323)
16	37287800	37289000	Abomasum	EnhAMe	Enhancers	BTLTR1F	LTR-ERVK	intergenic	gene-SELP(dist=2750),gene-SELL(dist=51128)
16	38853600	38853800	Liver	EnhAMe	Enhancers	LTR3_BT	LTR-ERVK	intergenic	gene-FMO1(dist=4525),gene-FMO4(dist=11358)
16	41619000	41619400	Liver	EnhAMe	Enhancers	LTR2_BT	LTR-ERVK	intronic	gene-TNFRSF8
16	43175000	43175200	Jejunum	EnhAMe	Enhancers	BTLTR1B1	LTR-ERVK	intergenic	gene-PGD(dist=1684),gene-TRNAR-CCG-2(dist=3023)
16	57991200	57991800	Rumen	EnhAMe	Enhancers	BTLTR1B	LTR-ERVK	intronic	gene-PAPPA2
16	70732600	70732800	Lung	EnhAMe	Enhancers	BTLTR1C	LTR-ERVK	intronic	gene-SPATA45
16	75624000	75624400	Jejunum	EnhAMe	Enhancers	ERV2-1B-LTR_BT	LTR-ERVK	intergenic	gene-CD46(dist=2845),gene-MIR29E(dist=35973)
17	312400	312600	Cerebellum	EnhAMe	Enhancers	ERV2-1-I_BT	LTR-ERVK	intergenic	gene-TMEM192(dist=102311),gene-KLHL2(dist=27075)
17	3984600	3984800	Rumen	EnhAMe	Enhancers	BTLTR1B	LTR-ERVK	intronic	gene-TLR2
17	51026400	51026600	Jejunum	EnhAMe	Enhancers	BTLTR1	LTR-ERVK	intergenic	gene-SCARB1(dist=3935),gene-NCOR2(dist=197043)
17	62283800	62284200	Colon	EnhAMe	Enhancers	ERV2-1B-LTR_BT	LTR-ERVK	intronic	gene-MAPKAPK5
17	62284000	62284200	Lung	EnhAMe	Enhancers	ERV2-1B-LTR_BT	LTR-ERVK	intronic	gene-MAPKAPK5
17	62284400	62284600	Jejunum	EnhAMe	Enhancers	ERV2-1B-LTR_BT	LTR-ERVK	intronic	gene-MAPKAPK5
17	67339600	67339800	Jejunum	EnhAMe	Enhancers	BTLTR1B1	LTR-ERVK	intronic	gene-LOC101903015
17	70944600	70944800	Ileum	EnhAMe	Enhancers	BTLTR1	LTR-ERVK	intronic	gene-IGLL1,gene-LOC112442070
18	1885200	1885600	Jejunum	EnhAMe	Enhancers	BTLTR1E	LTR-ERVK	intronic	gene-PDPR
18	1885200	1886000	Cecum	EnhAMe	Enhancers	BTLTR1E	LTR-ERVK	intronic	gene-PDPR
18	1885400	1885800	Abomasum	EnhAMe	Enhancers	BTLTR1E	LTR-ERVK	intronic	gene-PDPR
18	1885400	1886000	Colon	EnhAMe	Enhancers	BTLTR1E	LTR-ERVK	intronic	gene-PDPR
18	34753800	34754000	Jejunum	EnhAMe	Enhancers	BTLTR1F	LTR-ERVK	downstream	gene-CBFB
18	36843000	36843400	Abomasum	EnhAMe	Enhancers	ERV2-1B-LTR_BT	LTR-ERVK	intronic	gene-WWP2
18	36843200	36843400	Lung	EnhAMe	Enhancers	ERV2-1B-LTR_BT	LTR-ERVK	intronic	gene-WWP2
18	48536400	48536600	Jejunum	EnhAMe	Enhancers	LTR3_BT	LTR-ERVK	downstream	gene-LGALS4
18	49288600	49288800	Cecum	EnhAMe	Enhancers	BTLTR1C	LTR-ERVK	intronic	gene-LOC515276
18	49288600	49288800	Colon	EnhAMe	Enhancers	BTLTR1C	LTR-ERVK	intronic	gene-LOC515276
18	50329000	50329200	Lung	EnhAMe	Enhancers	ERV2-1B-LTR_BT	LTR-ERVK	intergenic	gene-CYP2B6(dist=20967),gene-CYP2S1(dist=50391)
18	54744000	54744400	Jejunum	EnhAMe	Enhancers	BTLTR1F	LTR-ERVK	intronic	gene-SULT2A1
18	54744200	54744400	Duodenum	EnhAMe	Enhancers	BTLTR1F	LTR-ERVK	intronic	gene-SULT2A1
18	54744200	54744600	Ileum	EnhAMe	Enhancers	BTLTR1F	LTR-ERVK	intronic	gene-SULT2A1
18	54746800	54747600	Ileum	EnhAMe	Enhancers	ERV2-1-I_BT	LTR-ERVK	intronic	gene-SULT2A1
18	54748200	54748400	Jejunum	EnhAMe	Enhancers	BTLTR1F	LTR-ERVK	intronic	gene-SULT2A1
18	54748200	54748600	Ileum	EnhAMe	Enhancers	BTLTR1F	LTR-ERVK	intronic	gene-SULT2A1
18	59506200	59506400	Colon	EnhAMe	Enhancers	ERV2-1C-LTR_BT	LTR-ERVK	intronic	gene-LOC100299712
18	59507600	59508000	Colon	EnhAMe	Enhancers	ERV2-1C-LTR_BT	LTR-ERVK	intronic	gene-LOC100299712
18	59507800	59508000	Cecum	EnhAMe	Enhancers	ERV2-1C-LTR_BT	LTR-ERVK	intronic	gene-LOC100299712
18	59508400	59509200	Colon	EnhAMe	Enhancers	ERV2-1-I_BT	LTR-ERVK	intronic	gene-LOC100299712
18	59508800	59509200	Cecum	EnhAMe	Enhancers	ERV2-1-I_BT	LTR-ERVK	intronic	gene-LOC100299712
18	59509000	59509200	Ileum	EnhAMe	Enhancers	ERV2-1-I_BT	LTR-ERVK	intronic	gene-LOC100299712
18	59509000	59509200	Jejunum	EnhAMe	Enhancers	ERV2-1-I_BT	LTR-ERVK	intronic	gene-LOC100299712
18	59516000	59516200	Colon	EnhAMe	Enhancers	ERV2-1-I_BT	LTR-ERVK	intronic	gene-LOC100299712
18	59518600	59518800	Cecum	EnhAMe	Enhancers	ERV2-1-I_BT	LTR-ERVK	intronic	gene-LOC100299712
18	59518600	59518800	Jejunum	EnhAMe	Enhancers	ERV2-1-I_BT	LTR-ERVK	intronic	gene-LOC100299712
18	60545800	60546200	Colon	EnhAMe	Enhancers	ERV2-1C-LTR_BT	LTR-ERVK	intronic	gene-LOC100336208,gene-LOC104968479
19	5126600	5127000	Lung	EnhAMe	Enhancers	ERV2-1B-LTR_BT	LTR-ERVK	intronic	gene-STXBP4
19	10348600	10349000	Cecum	EnhAMe	Enhancers	BTLTR1B	LTR-ERVK	intronic	gene-YPEL2
19	10348800	10349000	Jejunum	EnhAMe	Enhancers	BTLTR1	LTR-ERVK	intronic	gene-YPEL2
19	33925600	33925800	Colon	EnhAMe	Enhancers	ERV2-1B-LTR_BT	LTR-ERVK	intronic	gene-ALDH3A2
19	33925600	33925800	Jejunum	EnhAMe	Enhancers	ERV2-1B-LTR_BT	LTR-ERVK	intronic	gene-ALDH3A2
19	53411600	53412000	Colon	EnhAMe	Enhancers	LTR46_BT	LTR-ERVK	intergenic	gene-CANT1(dist=3774),gene-LGALS3BP(dist=4667)
19	63356000	63356200	Jejunum	EnhAMe	Enhancers	BTLTR1B	LTR-ERVK	intergenic	gene-HELZ(dist=63043),gene-LOC112442745(dist=82598)
2	2212200	2213200	Cecum	EnhAMe	Enhancers	ERV2-1-I_BT	LTR-ERVK	intergenic	gene-PLEKHB2(dist=242404),gene-HS6ST1(dist=1974187)
2	2212400	2213400	Colon	EnhAMe	Enhancers	ERV2-1-I_BT	LTR-ERVK	intergenic	gene-PLEKHB2(dist=242604),gene-HS6ST1(dist=1973987)
2	2214200	2214600	Colon	EnhAMe	Enhancers	ERV2-1-I_BT	LTR-ERVK	intergenic	gene-PLEKHB2(dist=244404),gene-HS6ST1(dist=1972787)
2	2214200	2214800	Cecum	EnhAMe	Enhancers	ERV2-1-I_BT	LTR-ERVK	intergenic	gene-PLEKHB2(dist=244404),gene-HS6ST1(dist=1972587)
2	2215400	2215800	Colon	EnhAMe	Enhancers	ERV2-1-I_BT	LTR-ERVK	intergenic	gene-PLEKHB2(dist=245604),gene-HS6ST1(dist=1971587)
2	2215600	2215800	Cecum	EnhAMe	Enhancers	ERV2-1-I_BT	LTR-ERVK	intergenic	gene-PLEKHB2(dist=245804),gene-HS6ST1(dist=1971587)
2	2221800	2222200	Cecum	EnhAMe	Enhancers	ERV2-1-I_BT	LTR-ERVK	intergenic	gene-PLEKHB2(dist=252004),gene-HS6ST1(dist=1965187)
2	2222000	2222400	Colon	EnhAMe	Enhancers	ERV2-1-I_BT	LTR-ERVK	intergenic	gene-PLEKHB2(dist=252204),gene-HS6ST1(dist=1964987)
2	4647200	4647400	Lung	EnhAMe	Enhancers	BTLTR1F	LTR-ERVK	intergenic	gene-POLR2D(dist=12034),gene-WDR33(dist=29597)
2	4647200	4647600	Colon	EnhAMe	Enhancers	BTLTR1F	LTR-ERVK	intergenic	gene-POLR2D(dist=12034),gene-WDR33(dist=29397)
2	4647200	4647600	Jejunum	EnhAMe	Enhancers	BTLTR1F	LTR-ERVK	intergenic	gene-POLR2D(dist=12034),gene-WDR33(dist=29397)
2	4647400	4647600	Abomasum	EnhAMe	Enhancers	BTLTR1F	LTR-ERVK	intergenic	gene-POLR2D(dist=12234),gene-WDR33(dist=29397)
2	6421400	6421600	Cecum	EnhAMe	Enhancers	ERV2-2B_BT-I	LTR-ERVK	intergenic	gene-MSTN(dist=135910),gene-PMS1(dist=38494)
2	6686600	6687000	Lung	EnhAMe	Enhancers	BTLTR1C	LTR-ERVK	intergenic	gene-ASNSD1(dist=10169),gene-SLC40A1(dist=87991)
2	6686800	6687000	Abomasum	EnhAMe	Enhancers	BTLTR1C	LTR-ERVK	intergenic	gene-ASNSD1(dist=10369),gene-SLC40A1(dist=87991)
2	20590200	20590600	Jejunum	EnhAMe	Enhancers	BTLTR1E2	LTR-ERVK	intronic	gene-MTX2
2	27144400	27145200	Lung	EnhAMe	Enhancers	ERV2-1B-LTR_BT	LTR-ERVK	intronic	gene-ABCB11
2	27144600	27145000	Duodenum	EnhAMe	Enhancers	ERV2-1B-LTR_BT	LTR-ERVK	intronic	gene-ABCB11
2	27144600	27145000	Jejunum	EnhAMe	Enhancers	ERV2-1B-LTR_BT	LTR-ERVK	intronic	gene-ABCB11
2	50252800	50253400	Cecum	EnhAMe	Enhancers	ERV2-1C-LTR_BT	LTR-ERVK	intergenic	gene-LOC786829(dist=620922),gene-LOC101904069(dist=1916231)
2	50253200	50253400	Lung	EnhAMe	Enhancers	ERV2-1C-LTR_BT	LTR-ERVK	intergenic	gene-LOC786829(dist=621322),gene-LOC101904069(dist=1916231)
2	59310400	59311000	Colon	EnhAMe	Enhancers	ERV2-1B-LTR_BT	LTR-ERVK	intergenic	gene-HNMT(dist=130122),gene-THSD7B(dist=199747)
2	59310600	59310800	Jejunum	EnhAMe	Enhancers	ERV2-1B-LTR_BT	LTR-ERVK	intergenic	gene-HNMT(dist=130322),gene-THSD7B(dist=199947)
2	59310600	59311000	Cecum	EnhAMe	Enhancers	ERV2-1B-LTR_BT	LTR-ERVK	intergenic	gene-HNMT(dist=130322),gene-THSD7B(dist=199747)
2	89227600	89228200	Cecum	EnhAMe	Enhancers	BTLTR1C	LTR-ERVK	intergenic	gene-AOX1(dist=53686),gene-AOX4(dist=55474)
2	106000000	106000000	Abomasum	EnhAMe	Enhancers	ERV2-1-LTR_BT	LTR-ERVK	intronic	gene-PNKD
2	107000000	107000000	Colon	EnhAMe	Enhancers	ERV2-1C-LTR_BT	LTR-ERVK	intronic	gene-CYP27A1
2	107000000	107000000	Cecum	EnhAMe	Enhancers	ERV2-1C-LTR_BT	LTR-ERVK	intronic	gene-CYP27A1
2	107000000	107000000	Jejunum	EnhAMe	Enhancers	ERV2-1C-LTR_BT	LTR-ERVK	intronic	gene-CYP27A1
2	107000000	107000000	Abomasum	EnhAMe	Enhancers	ERV2-1C-LTR_BT	LTR-ERVK	intronic	gene-CYP27A1
2	107000000	107000000	Lung	EnhAMe	Enhancers	ERV2-1C-LTR_BT	LTR-ERVK	intronic	gene-CYP27A1
2	126000000	126000000	Lung	EnhAMe	Enhancers	ERV2-3-LTR_BT	LTR-ERVK	intronic	gene-WDTC1
2	129000000	129000000	Cecum	EnhAMe	Enhancers	BTLTR1B1	LTR-ERVK	intergenic	gene-CNR2(dist=11939),gene-FUCA1(dist=5829)
2	129000000	129000000	Colon	EnhAMe	Enhancers	BTLTR1B1	LTR-ERVK	intergenic	gene-CNR2(dist=11939),gene-FUCA1(dist=5629)
2	129000000	129000000	Duodenum	EnhAMe	Enhancers	BTLTR1B1	LTR-ERVK	intergenic	gene-CNR2(dist=11939),gene-FUCA1(dist=5629)
2	129000000	129000000	Jejunum	EnhAMe	Enhancers	BTLTR1B1	LTR-ERVK	intergenic	gene-CNR2(dist=11939),gene-FUCA1(dist=5629)
2	130000000	130000000	Rumen	EnhAMe	Enhancers	BTLTR1F	LTR-ERVK	intronic	gene-ZBTB40
20	394600	395200	Colon	EnhAMe	Enhancers	BTLTR1C	LTR-ERVK	intergenic	gene-PANK3(dist=67134),gene-SLIT3(dist=47768)
20	394800	395000	Cecum	EnhAMe	Enhancers	BTLTR1C	LTR-ERVK	intergenic	gene-PANK3(dist=67334),gene-SLIT3(dist=47968)
20	33175600	33175800	Colon	EnhAMe	Enhancers	ERV2-1B-LTR_BT	LTR-ERVK	intronic	gene-PLCXD3
20	33176600	33176800	Lung	EnhAMe	Enhancers	ERV2-1B-LTR_BT	LTR-ERVK	intronic	gene-PLCXD3
20	41073000	41073600	Cecum	EnhAMe	Enhancers	ERV2-1B-LTR_BT	LTR-ERVK	intronic	gene-SUB1
20	62961800	62962000	Abomasum	EnhAMe	Enhancers	BTLTR1B	LTR-ERVK	intronic	gene-CMBL
20	68766000	68766400	Rumen	EnhAMe	Enhancers	BTLTR1B	LTR-ERVK	intergenic	gene-LOC101902976(dist=687185),gene-IRX1(dist=563816)
20	71940200	71940800	Colon	EnhAMe	Enhancers	LTR3_BT	LTR-ERVK	intergenic	gene-LOC101906441(dist=8724),gene-LOC524810(dist=2925)
20	71940400	71940600	Abomasum	EnhAMe	Enhancers	LTR3_BT	LTR-ERVK	intergenic	gene-LOC101906441(dist=8924),gene-LOC524810(dist=3125)
20	71940400	71940800	Cecum	EnhAMe	Enhancers	LTR3_BT	LTR-ERVK	intergenic	gene-LOC101906441(dist=8924),gene-LOC524810(dist=2925)
20	71940400	71940800	Duodenum	EnhAMe	Enhancers	LTR3_BT	LTR-ERVK	intergenic	gene-LOC101906441(dist=8924),gene-LOC524810(dist=2925)
20	71940400	71940800	Ileum	EnhAMe	Enhancers	LTR3_BT	LTR-ERVK	intergenic	gene-LOC101906441(dist=8924),gene-LOC524810(dist=2925)
20	71940400	71940800	Jejunum	EnhAMe	Enhancers	LTR3_BT	LTR-ERVK	intergenic	gene-LOC101906441(dist=8924),gene-LOC524810(dist=2925)
20	71940400	71941000	Liver	EnhAMe	Enhancers	LTR3_BT	LTR-ERVK	intergenic	gene-LOC101906441(dist=8924),gene-LOC524810(dist=2725)
21	570000	570400	Cecum	EnhAMe	Enhancers	ERV2-1C-LTR_BT	LTR-ERVK	intergenic	gene-LOC104968484(dist=175023),gene-LOC112443246(dist=12105)
21	776200	776400	Cecum	EnhAMe	Enhancers	ERV2-1-I_BT	LTR-ERVK	intergenic	gene-LOC112443209(dist=58879),gene-MKRN3(dist=383329)
21	19628200	19628400	Colon	EnhAMe	Enhancers	ERV2-3-LTR_BT	LTR-ERVK	intergenic	gene-ISG20(dist=3499),gene-LOC101903572(dist=1663)
21	19630000	19630200	Colon	EnhAMe	Enhancers	ERV2-3-I_BT	LTR-ERVK	exonic	gene-LOC101903572
21	19885600	19885800	Jejunum	EnhAMe	Enhancers	LTR3_BT	LTR-ERVK	intergenic	gene-LOC529925(dist=63571),gene-LOC101906218(dist=30729)
21	19885600	19886000	Cecum	EnhAMe	Enhancers	LTR3_BT	LTR-ERVK	intergenic	gene-LOC529925(dist=63571),gene-LOC101906218(dist=30529)
21	19901400	19901600	Colon	EnhAMe	Enhancers	LTR3_BT	LTR-ERVK	intergenic	gene-LOC529925(dist=79371),gene-LOC101906218(dist=14929)
21	23388400	23388600	Abomasum	EnhAMe	Enhancers	ERV2-1C-LTR_BT	LTR-ERVK	intergenic	gene-C21H15orf40(dist=124284),gene-MEX3B(dist=479210)
21	23388400	23388600	Colon	EnhAMe	Enhancers	ERV2-1C-LTR_BT	LTR-ERVK	intergenic	gene-C21H15orf40(dist=124284),gene-MEX3B(dist=479210)
21	58349200	58349400	Cecum	EnhAMe	Enhancers	ERV2-1B-LTR_BT	LTR-ERVK	intergenic	gene-UNC79(dist=16937),gene-PRIMA1(dist=4052)
21	67177200	67177400	Abomasum	EnhAMe	Enhancers	ERV2-1C-LTR_BT	LTR-ERVK	intronic	gene-TECPR2
22	6411600	6411800	Ileum	EnhAMe	Enhancers	BTLTR1	LTR-ERVK	intronic	gene-OSBPL10
22	6787000	6787400	Cecum	EnhAMe	Enhancers	BTLTR1E1	LTR-ERVK	intronic	gene-CMTM8
22	6787000	6787400	Jejunum	EnhAMe	Enhancers	BTLTR1E1	LTR-ERVK	intronic	gene-CMTM8
22	6787000	6788000	Colon	EnhAMe	Enhancers	BTLTR1E1	LTR-ERVK	intronic	gene-CMTM8
22	9930800	9931200	Jejunum	EnhAMe	Enhancers	BTLTR1E3	LTR-ERVK	intergenic	gene-MIR128-2(dist=225503),gene-STAC(dist=196471)
22	10574000	10574400	Jejunum	EnhAMe	Enhancers	BTLTR1F	LTR-ERVK	intergenic	gene-EPM2AIP1(dist=14993),gene-TRANK1(dist=16147)
22	17621800	17622000	Ileum	EnhAMe	Enhancers	LTR2_BT	LTR-ERVK	intronic	gene-RAD18
22	52930600	52931000	Colon	EnhAMe	Enhancers	BTLTR1C	LTR-ERVK	exonic	gene-RTP3
22	52930800	52931000	Abomasum	EnhAMe	Enhancers	BTLTR1C	LTR-ERVK	UTR3	gene-LRRC2
22	52930800	52931000	Cecum	EnhAMe	Enhancers	BTLTR1C	LTR-ERVK	UTR3	gene-LRRC2
22	55230600	55231000	Cecum	EnhAMe	Enhancers	BTLTR1E	LTR-ERVK	UTR5	gene-HRH1
22	55230800	55231000	Colon	EnhAMe	Enhancers	BTLTR1E	LTR-ERVK	UTR5	gene-HRH1
22	55230800	55231000	Lung	EnhAMe	Enhancers	BTLTR1E	LTR-ERVK	UTR5	gene-HRH1
22	58443800	58444000	Jejunum	EnhAMe	Enhancers	BTLTR1	LTR-ERVK	intergenic	gene-HDAC11(dist=1813),gene-NUP210(dist=37420)
23	4185400	4185600	Colon	EnhAMe	Enhancers	BTLTR1	LTR-ERVK	intronic	gene-COL21A1
23	10293800	10294200	Jejunum	EnhAMe	Enhancers	BTLTR1B1	LTR-ERVK	intergenic	gene-C23H6orf222(dist=1330),gene-PXT1(dist=46468)
23	22829800	22830000	Cecum	EnhAMe	Enhancers	BTLTR1B	LTR-ERVK	intergenic	NONE(dist=NONE),gene-TFAP2D(dist=447602)
23	22829800	22830000	Jejunum	EnhAMe	Enhancers	BTLTR1B	LTR-ERVK	intergenic	NONE(dist=NONE),gene-TFAP2D(dist=447602)
23	25096200	25096600	Lung	EnhAMe	Enhancers	ERV2-1C-LTR_BT	LTR-ERVK	intergenic	gene-GSTA2(dist=7647),gene-GSTA1(dist=25765)
23	25096400	25096800	Colon	EnhAMe	Enhancers	ERV2-1C-LTR_BT	LTR-ERVK	intergenic	gene-GSTA2(dist=7847),gene-GSTA1(dist=25565)
23	25956200	25956400	Jejunum	EnhAMe	Enhancers	BTLTR1B	LTR-ERVK	intronic	gene-LOC783151
23	26681200	26681600	Jejunum	EnhAMe	Enhancers	LTR3_BT	LTR-ERVK	upstream	gene-LOC112443756
23	26725200	26726000	Ileum	EnhAMe	Enhancers	ERV2-1C-LTR_BT	LTR-ERVK	intergenic	gene-LOC112443756(dist=38576),gene-LOC100847986(dist=92108)
23	26725600	26726000	Lung	EnhAMe	Enhancers	ERV2-1C-LTR_BT	LTR-ERVK	intergenic	gene-LOC112443756(dist=38976),gene-LOC100847986(dist=92108)
23	26725800	26726000	Abomasum	EnhAMe	Enhancers	ERV2-1C-LTR_BT	LTR-ERVK	intergenic	gene-LOC112443756(dist=39176),gene-LOC100847986(dist=92108)
23	27105200	27106200	Jejunum	EnhAMe	Enhancers	ERV2-1C-LTR_BT	LTR-ERVK	intergenic	gene-LOC112443844(dist=10284),gene-LOC615223(dist=3231)
23	27105600	27105800	Lung	EnhAMe	Enhancers	ERV2-1C-LTR_BT	LTR-ERVK	intergenic	gene-LOC112443844(dist=10684),gene-LOC615223(dist=3631)
23	28061600	28062000	Lung	EnhAMe	Enhancers	BTLTR1F	LTR-ERVK	intergenic	gene-LOC616942(dist=2202),gene-TRNAG-CCC-150(dist=5605)
23	28690000	28690400	Jejunum	EnhAMe	Enhancers	ERV2-1C-LTR_BT	LTR-ERVK	intergenic	gene-JSP.1(dist=22539),gene-BOLA-3(dist=30098)
23	28690200	28690400	Cecum	EnhAMe	Enhancers	ERV2-1C-LTR_BT	LTR-ERVK	intergenic	gene-JSP.1(dist=22739),gene-BOLA-3(dist=30098)
23	28753600	28753800	Colon	EnhAMe	Enhancers	ERV2-1C-LTR_BT	LTR-ERVK	intergenic	gene-BOLA-3(dist=29248),gene-LOC785873(dist=16018)
23	29989600	29990000	Duodenum	EnhAMe	Enhancers	BTLTR1J4	LTR-ERVK	intergenic	gene-LOC782554(dist=58095),gene-ZNF311(dist=4449)
23	29989600	29990000	Lung	EnhAMe	Enhancers	BTLTR1J4	LTR-ERVK	intergenic	gene-LOC782554(dist=58095),gene-ZNF311(dist=4449)
23	31419200	31419400	Abomasum	EnhAMe	Enhancers	BTLTR1C	LTR-ERVK	downstream	gene-TRNAM-CAU-29
23	31419200	31419400	Colon	EnhAMe	Enhancers	BTLTR1C	LTR-ERVK	downstream	gene-TRNAM-CAU-29
23	31419200	31419600	Duodenum	EnhAMe	Enhancers	BTLTR1C	LTR-ERVK	downstream	gene-TRNAM-CAU-29
23	31419200	31419600	Ileum	EnhAMe	Enhancers	BTLTR1C	LTR-ERVK	downstream	gene-TRNAM-CAU-29
23	31419200	31419600	Jejunum	EnhAMe	Enhancers	BTLTR1C	LTR-ERVK	downstream	gene-TRNAM-CAU-29
23	31419400	31419600	Lung	EnhAMe	Enhancers	BTLTR1C	LTR-ERVK	downstream	gene-TRNAM-CAU-29
23	50800200	50800600	Ileum	EnhAMe	Enhancers	LTR2B_BT	LTR-ERVK	intergenic	gene-SERPINB9(dist=6712),gene-SERPINB1(dist=20061)
24	3961600	3961800	Ileum	EnhAMe	Enhancers	BTLTR1	LTR-ERVK	intergenic	gene-LOC112444151(dist=3038),gene-CNDP1(dist=2629)
24	3962000	3962400	Jejunum	EnhAMe	Enhancers	BTLTR1	LTR-ERVK	intergenic	gene-LOC112444151(dist=3438),gene-CNDP1(dist=2029)
24	12441600	12441800	Duodenum	EnhAMe	Enhancers	LTR46_BT	LTR-ERVK	intergenic	gene-SERPINB8(dist=9288),gene-LOC281376(dist=5165)
24	13551600	13552000	Lung	EnhAMe	Enhancers	BTLTR1J4	LTR-ERVK	intergenic	gene-SYT4(dist=891534),gene-PIK3C3(dist=325870)
25	2167200	2167400	Lung	EnhAMe	Enhancers	LTR3_BT	LTR-ERVK	intergenic	gene-PRSS27(dist=34238),gene-PRSS22(dist=10775)
25	3859600	3859800	Lung	EnhAMe	Enhancers	BTLTR1C	LTR-ERVK	intronic	gene-SEPT12
25	18261800	18262400	Lung	EnhAMe	Enhancers	ERV2-1C-LTR_BT	LTR-ERVK	intronic	gene-ACSM1
25	26117600	26117800	Lung	EnhAMe	Enhancers	BTLTR1D	LTR-ERVK	intronic	gene-SGF29
25	28194400	28194800	Jejunum	EnhAMe	Enhancers	LTR2_BT	LTR-ERVK	intergenic	gene-TPST1(dist=6264),gene-KCTD7(dist=9857)
25	36426800	36427000	Liver	EnhAMe	Enhancers	LTR7_BT	LTR-ERVK	intergenic	gene-ZKSCAN1(dist=7942),gene-AZGP1(dist=18776)
25	36430400	36430600	Abomasum	EnhAMe	Enhancers	LTR7_BT	LTR-ERVK	intergenic	gene-ZKSCAN1(dist=11542),gene-AZGP1(dist=15176)
25	36430400	36431000	Duodenum	EnhAMe	Enhancers	LTR7_BT	LTR-ERVK	intergenic	gene-ZKSCAN1(dist=11542),gene-AZGP1(dist=14776)
25	36430400	36431200	Jejunum	EnhAMe	Enhancers	LTR7_BT	LTR-ERVK	intergenic	gene-ZKSCAN1(dist=11542),gene-AZGP1(dist=14576)
25	36430400	36431200	Liver	EnhAMe	Enhancers	LTR7_BT	LTR-ERVK	intergenic	gene-ZKSCAN1(dist=11542),gene-AZGP1(dist=14576)
25	36672600	36672800	Colon	EnhAMe	Enhancers	ERV2-1C-LTR_BT	LTR-ERVK	intronic	gene-CYP3A5-2
25	41484000	41484200	Jejunum	EnhAMe	Enhancers	BTLTR1B	LTR-ERVK	intergenic	gene-MICALL2(dist=3731),gene-UNCX(dist=127459)
26	16096000	16096400	Cecum	EnhAMe	Enhancers	LTR46_BT	LTR-ERVK	intronic	gene-CYP2C18
26	16096000	16096800	Colon	EnhAMe	Enhancers	LTR46_BT	LTR-ERVK	intronic	gene-CYP2C18
26	16096000	16096800	Jejunum	EnhAMe	Enhancers	LTR46_BT	LTR-ERVK	intronic	gene-CYP2C18
26	16172600	16172800	Duodenum	EnhAMe	Enhancers	BTLTR1F	LTR-ERVK	intronic	gene-CYP2C87
26	21065200	21065400	Jejunum	EnhAMe	Enhancers	BTLTR1B	LTR-ERVK	intronic	gene-ERLIN1
27	37379400	37379800	Jejunum	EnhAMe	Enhancers	BTLTR1	LTR-ERVK	intronic	gene-SMIM19
27	38853800	38854000	Colon	EnhAMe	Enhancers	ERV2-1C-LTR_BT	LTR-ERVK	intronic	gene-PSD3
27	38854200	38854800	Abomasum	EnhAMe	Enhancers	ERV2-1C-LTR_BT	LTR-ERVK	intronic	gene-PSD3
27	38854200	38855000	Cecum	EnhAMe	Enhancers	ERV2-1C-LTR_BT	LTR-ERVK	intronic	gene-PSD3
27	38854200	38855000	Colon	EnhAMe	Enhancers	ERV2-1C-LTR_BT	LTR-ERVK	intronic	gene-PSD3
28	2901600	2901800	Lung	EnhAMe	Enhancers	BTLTR1C	LTR-ERVK	intergenic	gene-LOC100337323(dist=10363),gene-LOC614741(dist=50158)
28	14937800	14938600	Colon	EnhAMe	Enhancers	ERV2-1C-LTR_BT	LTR-ERVK	intronic	gene-FAM13C
28	14938000	14938600	Abomasum	EnhAMe	Enhancers	ERV2-1C-LTR_BT	LTR-ERVK	intronic	gene-FAM13C
28	29182800	29183000	Cecum	EnhAMe	Enhancers	ERV2-1B-LTR_BT	LTR-ERVK	intergenic	gene-P4HA1(dist=15306),gene-NUDT13(dist=6838)
28	29182800	29183000	Colon	EnhAMe	Enhancers	ERV2-1B-LTR_BT	LTR-ERVK	intergenic	gene-P4HA1(dist=15306),gene-NUDT13(dist=6838)
28	29182800	29183000	Lung	EnhAMe	Enhancers	ERV2-1B-LTR_BT	LTR-ERVK	intergenic	gene-P4HA1(dist=15306),gene-NUDT13(dist=6838)
29	27859000	27859400	Cecum	EnhAMe	Enhancers	BTLTR1B1	LTR-ERVK	intergenic	gene-LOC782797(dist=18258),gene-LOC513914(dist=4613)
29	40534000	40534200	Lung	EnhAMe	Enhancers	BTLTR1B1	LTR-ERVK	intergenic	gene-FTH1(dist=53805),gene-INCENP(dist=62009)
29	41172400	41172600	Cerebellum	EnhAMe	Enhancers	ERV2-1-I_BT	LTR-ERVK	intronic	gene-SLC3A2
29	44420800	44421000	Duodenum	EnhAMe	Enhancers	ERV2-1C-LTR_BT	LTR-ERVK	intergenic	gene-SLC29A2(dist=1854),gene-NPAS4(dist=43286)
29	44420800	44421000	Jejunum	EnhAMe	Enhancers	ERV2-1C-LTR_BT	LTR-ERVK	intergenic	gene-SLC29A2(dist=1854),gene-NPAS4(dist=43286)
29	44420800	44421200	Abomasum	EnhAMe	Enhancers	ERV2-1C-LTR_BT	LTR-ERVK	intergenic	gene-SLC29A2(dist=1854),gene-NPAS4(dist=43086)
29	44420800	44421200	Cecum	EnhAMe	Enhancers	ERV2-1C-LTR_BT	LTR-ERVK	intergenic	gene-SLC29A2(dist=1854),gene-NPAS4(dist=43086)
29	50929000	50929400	Liver	EnhAMe	Enhancers	ERV2-1-I_BT	LTR-ERVK	intergenic	gene-B4GALNT4(dist=19810),gene-IFITM3(dist=1082)
3	9221200	9221400	Ileum	EnhAMe	Enhancers	BTLTR1C	LTR-ERVK	intergenic	gene-SLAMF6(dist=45690),gene-VANGL2(dist=42156)
3	9222000	9222200	Ileum	EnhAMe	Enhancers	BTLTR1C	LTR-ERVK	intergenic	gene-SLAMF6(dist=46490),gene-VANGL2(dist=41356)
3	10699800	10700000	Ileum	EnhAMe	Enhancers	BTLTR1D2	LTR-ERVK	upstream	gene-IFI16
3	10699800	10700400	Colon	EnhAMe	Enhancers	BTLTR1D2	LTR-ERVK	upstream	gene-IFI16
3	10699800	10700600	Abomasum	EnhAMe	Enhancers	BTLTR1D2	LTR-ERVK	upstream	gene-IFI16
3	10699800	10700800	Cecum	EnhAMe	Enhancers	BTLTR1D2	LTR-ERVK	UTR5	gene-IFI16
3	10700000	10700800	Jejunum	EnhAMe	Enhancers	BTLTR1D2	LTR-ERVK	UTR5	gene-IFI16
3	12784800	12785000	Lung	EnhAMe	Enhancers	ERV2-1C-LTR_BT	LTR-ERVK	intergenic	gene-FCRL4(dist=6333),gene-FCRL5(dist=19184)
3	12785600	12786000	Lung	EnhAMe	Enhancers	ERV2-1C-LTR_BT	LTR-ERVK	intergenic	gene-FCRL4(dist=7133),gene-FCRL5(dist=18184)
3	18904200	18904400	Lung	EnhAMe	Enhancers	LTR2_BT	LTR-ERVK	intergenic	gene-THEM4(dist=10704),gene-THEM5(dist=17794)
3	54466000	54466200	Jejunum	EnhAMe	Enhancers	BTLTR1C	LTR-ERVK	intronic	gene-GBP4
3	73640400	73640800	Lung	EnhAMe	Enhancers	BTLTR1C	LTR-ERVK	intronic	gene-NEGR1
3	93442800	93443600	Lung	EnhAMe	Enhancers	ERV2-1B-LTR_BT	LTR-ERVK	intronic	gene-ECHDC2
3	93443200	93443400	Abomasum	EnhAMe	Enhancers	ERV2-1B-LTR_BT	LTR-ERVK	intronic	gene-ECHDC2
3	99190200	99190600	Jejunum	EnhAMe	Enhancers	LTR2C_BT	LTR-ERVK	intergenic	gene-LOC100847677(dist=72605),gene-CYP4A11(dist=17958)
3	101000000	101000000	Duodenum	EnhAMe	Enhancers	BTLTR1F	LTR-ERVK	intergenic	gene-AKR1A1(dist=6872),gene-PRDX1(dist=27341)
3	101000000	101000000	Ileum	EnhAMe	Enhancers	BTLTR1F	LTR-ERVK	intergenic	gene-AKR1A1(dist=7272),gene-PRDX1(dist=26941)
3	101000000	101000000	Cecum	EnhAMe	Enhancers	BTLTR1F	LTR-ERVK	intergenic	gene-AKR1A1(dist=8072),gene-PRDX1(dist=26141)
3	101000000	101000000	Ileum	EnhAMe	Enhancers	BTLTR1F	LTR-ERVK	intergenic	gene-AKR1A1(dist=8072),gene-PRDX1(dist=26141)
3	103000000	103000000	Cecum	EnhAMe	Enhancers	LTR3_BT	LTR-ERVK	intronic	gene-LOC531090
3	103000000	103000000	Abomasum	EnhAMe	Enhancers	LTR3_BT	LTR-ERVK	intronic	gene-LOC531090
3	103000000	103000000	Duodenum	EnhAMe	Enhancers	LTR3_BT	LTR-ERVK	intronic	gene-LOC531090
3	103000000	103000000	Colon	EnhAMe	Enhancers	LTR3_BT	LTR-ERVK	intronic	gene-LOC531090
3	113000000	113000000	Jejunum	EnhAMe	Enhancers	BTLTR1F	LTR-ERVK	intronic	gene-USP40
3	121000000	121000000	Jejunum	EnhAMe	Enhancers	BTLTR1B1	LTR-ERVK	intergenic	gene-D2HGDH(dist=4017),gene-GAL3ST2(dist=5477)
3	121000000	121000000	Jejunum	EnhAMe	Enhancers	ERV2-1B-LTR_BT	LTR-ERVK	intergenic	gene-D2HGDH(dist=8417),gene-GAL3ST2(dist=1077)
4	12963800	12964000	Liver	EnhAMe	Enhancers	LTR7_BT	LTR-ERVK	intergenic	gene-PDK4(dist=68439),gene-DYNC1I1(dist=97907)
4	30645800	30646200	Cecum	EnhAMe	Enhancers	BTLTR1B1	LTR-ERVK	intronic	gene-LOC104968411
4	30645800	30646400	Colon	EnhAMe	Enhancers	BTLTR1B1	LTR-ERVK	intronic	gene-LOC104968411
4	30646000	30646200	Lung	EnhAMe	Enhancers	BTLTR1B1	LTR-ERVK	intronic	gene-LOC104968411
4	33997800	33998000	Liver	EnhAMe	Enhancers	LTR46_BT	LTR-ERVK	intergenic	gene-GRM3(dist=119840),gene-TRNAS-GGA-9(dist=63781)
4	33997800	33998200	Jejunum	EnhAMe	Enhancers	LTR46_BT	LTR-ERVK	intergenic	gene-GRM3(dist=119840),gene-TRNAS-GGA-9(dist=63581)
4	44430200	44430400	Jejunum	EnhAMe	Enhancers	BTLTR1B1	LTR-ERVK	intronic	gene-ARMC10,gene-NAPEPLD
4	44466400	44467000	Jejunum	EnhAMe	Enhancers	LTR3_BT	LTR-ERVK	intronic	gene-ARMC10,gene-NAPEPLD
4	44466600	44467000	Cecum	EnhAMe	Enhancers	LTR3_BT	LTR-ERVK	intronic	gene-ARMC10,gene-NAPEPLD
4	44466600	44467000	Duodenum	EnhAMe	Enhancers	LTR3_BT	LTR-ERVK	intronic	gene-ARMC10,gene-NAPEPLD
4	65748800	65749000	Colon	EnhAMe	Enhancers	ERV2-1-I_BT	LTR-ERVK	intronic	gene-GARS
4	99137600	99137800	Lung	EnhAMe	Enhancers	ERV2-1B-LTR_BT	LTR-ERVK	intronic	gene-LOC100298868
4	106000000	106000000	Colon	EnhAMe	Enhancers	LTR2_BT	LTR-ERVK	downstream	gene-LOC112446438,gene-LOC783647
4	106000000	106000000	Jejunum	EnhAMe	Enhancers	LTR2_BT	LTR-ERVK	downstream	gene-LOC112446438,gene-LOC783647
4	119000000	119000000	Ileum	EnhAMe	Enhancers	BTLTR1	LTR-ERVK	intergenic	gene-UBE3C(dist=36832),gene-DNAJB6(dist=10473)
5	468000	468200	Cortex	EnhAMe	Enhancers	BTLTR1	LTR-ERVK	intergenic	gene-LOC782348(dist=51201),gene-MIR2284Y-6(dist=146332)
5	3214000	3214200	Liver	EnhAMe	Enhancers	LTR46_BT	LTR-ERVK	intergenic	gene-TRHDE(dist=843408),gene-ATXN7L3B(dist=854334)
5	25194000	25194600	Jejunum	EnhAMe	Enhancers	ERV2-2B_BT-LTR	LTR-ERVK	intergenic	gene-USP44(dist=42495),gene-MUCL1(dist=20442)
5	28802400	28802600	Cecum	EnhAMe	Enhancers	BTLTR1E1	LTR-ERVK	intergenic	gene-SLC11A2(dist=44424),gene-LOC512464(dist=43807)
5	28802400	28802600	Colon	EnhAMe	Enhancers	BTLTR1E1	LTR-ERVK	intergenic	gene-SLC11A2(dist=44424),gene-LOC512464(dist=43807)
5	28802400	28802600	Jejunum	EnhAMe	Enhancers	BTLTR1E1	LTR-ERVK	intergenic	gene-SLC11A2(dist=44424),gene-LOC512464(dist=43807)
5	28802800	28803000	Jejunum	EnhAMe	Enhancers	BTLTR1E1	LTR-ERVK	intergenic	gene-SLC11A2(dist=44824),gene-LOC512464(dist=43407)
5	36569000	36569600	Jejunum	EnhAMe	Enhancers	BTLTR1E	LTR-ERVK	intronic	gene-TMEM117
5	42112800	42113000	Rumen	EnhAMe	Enhancers	ERV2-3-I_BT	LTR-ERVK	intergenic	gene-LOC617654(dist=131152),gene-CPNE8(dist=80177)
5	60300200	60300400	Liver	EnhAMe	Enhancers	BTLTR1B	LTR-ERVK	UTR5	gene-HAL
5	74561000	74561200	Lung	EnhAMe	Enhancers	BTLTR1D2	LTR-ERVK	upstream	gene-LOC510193
5	74592800	74593200	Jejunum	EnhAMe	Enhancers	ERV2-1-LTR_BT	LTR-ERVK	UTR5	gene-LOC112446725
5	74592800	74593200	Lung	EnhAMe	Enhancers	ERV2-1-LTR_BT	LTR-ERVK	UTR5	gene-LOC112446725
5	74676800	74677000	Jejunum	EnhAMe	Enhancers	BTLTR1B1	LTR-ERVK	intronic	gene-APOL3-2
5	78073800	78074200	Lung	EnhAMe	Enhancers	LTR7_BT	LTR-ERVK	intergenic	gene-KIAA1551(dist=122822),gene-AMN1(dist=101943)
5	97446200	97446400	Abomasum	EnhAMe	Enhancers	BTLTR1B	LTR-ERVK	intergenic	gene-BORCS5(dist=5642),gene-MANSC1(dist=7988)
5	100000000	100000000	Cecum	EnhAMe	Enhancers	ERV2-1C-LTR_BT	LTR-ERVK	intergenic	gene-LOC509972(dist=10579),gene-LOC784451(dist=4413)
5	100000000	100000000	Ileum	EnhAMe	Enhancers	ERV2-1C-LTR_BT	LTR-ERVK	intergenic	gene-LOC509972(dist=10579),gene-LOC784451(dist=4213)
5	100000000	100000000	Colon	EnhAMe	Enhancers	ERV2-1C-LTR_BT	LTR-ERVK	intergenic	gene-LOC509972(dist=10779),gene-LOC784451(dist=4213)
5	100000000	100000000	Lung	EnhAMe	Enhancers	ERV2-1C-LTR_BT	LTR-ERVK	intergenic	gene-LOC509972(dist=10779),gene-LOC784451(dist=4213)
5	102000000	102000000	Jejunum	EnhAMe	Enhancers	ERV2-2B_BT-I	LTR-ERVK	ncRNA_intronic	gene-LOC751788
5	102000000	102000000	Jejunum	EnhAMe	Enhancers	ERV2-2B_BT-LTR	LTR-ERVK	ncRNA_intronic	gene-LOC751788
5	104000000	104000000	Lung	EnhAMe	Enhancers	ERV2-1-LTR_BT	LTR-ERVK	intronic	gene-VWF
5	117000000	117000000	Cecum	EnhAMe	Enhancers	BTLTR1	LTR-ERVK	upstream	gene-GTSE1
5	117000000	117000000	Jejunum	EnhAMe	Enhancers	ERV2-2B_BT-LTR	LTR-ERVK	intronic	gene-TRMU
6	5933400	5933600	Jejunum	EnhAMe	Enhancers	BTLTR1	LTR-ERVK	intergenic	gene-PDE5A(dist=39166),gene-FABP2(dist=36513)
6	13356800	13357000	Ileum	EnhAMe	Enhancers	BTLTR1C	LTR-ERVK	intronic	gene-FAM241A
6	13357400	13358000	Ileum	EnhAMe	Enhancers	BTLTR1C	LTR-ERVK	intronic	gene-FAM241A
6	24859600	24859800	Colon	EnhAMe	Enhancers	BTLTR1	LTR-ERVK	upstream	gene-DAPP1
6	24859600	24859800	Duodenum	EnhAMe	Enhancers	BTLTR1	LTR-ERVK	upstream	gene-DAPP1
6	24859600	24859800	Jejunum	EnhAMe	Enhancers	BTLTR1	LTR-ERVK	upstream	gene-DAPP1
6	24859600	24859800	Lung	EnhAMe	Enhancers	BTLTR1	LTR-ERVK	upstream	gene-DAPP1
6	24860000	24860200	Jejunum	EnhAMe	Enhancers	BTLTR1	LTR-ERVK	upstream	gene-DAPP1
6	25231200	25231400	Liver	EnhAMe	Enhancers	LTR3_BT	LTR-ERVK	intergenic	gene-ADH7(dist=40371),gene-ADH1C(dist=50001)
6	25282600	25282800	Liver	EnhAMe	Enhancers	BTLTR1	LTR-ERVK	intronic	gene-ADH1C
6	33346400	33346800	Rumen	EnhAMe	Enhancers	LTR2B_BT	LTR-ERVK	intronic	gene-CCSER1
6	42007600	42008000	Jejunum	EnhAMe	Enhancers	LTR46_BT	LTR-ERVK	intronic	gene-ADGRA3
6	73268200	73268600	Abomasum	EnhAMe	Enhancers	BTLTR1B	LTR-ERVK	intergenic	gene-TRNAC-GCA-85(dist=659875),gene-TRNAG-UCC-13(dist=272226)
6	73268400	73268600	Rumen	EnhAMe	Enhancers	BTLTR1B	LTR-ERVK	intergenic	gene-TRNAC-GCA-85(dist=660075),gene-TRNAG-UCC-13(dist=272226)
6	84808600	84808800	Rumen	EnhAMe	Enhancers	BTLTR1F	LTR-ERVK	intergenic	gene-LOC530553(dist=46211),gene-LOC526979(dist=4684)
6	84884400	84885200	Colon	EnhAMe	Enhancers	BTLTR1F	LTR-ERVK	intergenic	gene-LOC526979(dist=36698),gene-LOC781988(dist=64280)
6	84884400	84885400	Abomasum	EnhAMe	Enhancers	BTLTR1F	LTR-ERVK	intergenic	gene-LOC526979(dist=36698),gene-LOC781988(dist=64080)
6	84884400	84885600	Jejunum	EnhAMe	Enhancers	BTLTR1F	LTR-ERVK	intergenic	gene-LOC526979(dist=36698),gene-LOC781988(dist=63880)
6	84884600	84885200	Cecum	EnhAMe	Enhancers	BTLTR1F	LTR-ERVK	intergenic	gene-LOC526979(dist=36898),gene-LOC781988(dist=64280)
6	84885400	84885600	Colon	EnhAMe	Enhancers	BTLTR1F	LTR-ERVK	intergenic	gene-LOC526979(dist=37698),gene-LOC781988(dist=63880)
6	86147600	86147800	Lung	EnhAMe	Enhancers	BTLTR1D2	LTR-ERVK	intronic	gene-RUFY3
6	88884000	88884400	Cecum	EnhAMe	Enhancers	ERV2-1C-LTR_BT	LTR-ERVK	intergenic	gene-CXCL8(dist=69429),gene-LOC534181(dist=2743)
6	88884000	88884400	Lung	EnhAMe	Enhancers	ERV2-1C-LTR_BT	LTR-ERVK	intergenic	gene-CXCL8(dist=69429),gene-LOC534181(dist=2743)
6	102000000	102000000	Lung	EnhAMe	Enhancers	BTLTR1F	LTR-ERVK	intergenic	gene-LOC781224(dist=21469),gene-HSD17B13(dist=17894)
6	102000000	102000000	Rumen	EnhAMe	Enhancers	BTLTR1F	LTR-ERVK	intergenic	gene-LOC781224(dist=21469),gene-HSD17B13(dist=17894)
6	102000000	102000000	Lung	EnhAMe	Enhancers	BTLTR1F	LTR-ERVK	intergenic	gene-LOC781224(dist=21869),gene-HSD17B13(dist=17494)
6	105000000	105000000	Jejunum	EnhAMe	Enhancers	BTLTR1J4	LTR-ERVK	intergenic	gene-WDR1(dist=8017),gene-ZNF518B(dist=140307)
7	2517800	2518200	Jejunum	EnhAMe	Enhancers	BTLTR1B	LTR-ERVK	intergenic	gene-ZFP2(dist=27855),gene-RNF187(dist=24655)
7	5048600	5048800	Ileum	EnhAMe	Enhancers	BTLTR1E	LTR-ERVK	intergenic	gene-MPV17L2(dist=21586),gene-IFI30(dist=6103)
7	11029400	11029600	Lung	EnhAMe	Enhancers	ERV2-1C-LTR_BT	LTR-ERVK	intronic	gene-LOC112447333
7	11029600	11030000	Cecum	EnhAMe	Enhancers	ERV2-1C-LTR_BT	LTR-ERVK	intronic	gene-LOC112447333
7	11029600	11030000	Colon	EnhAMe	Enhancers	ERV2-1C-LTR_BT	LTR-ERVK	intronic	gene-LOC112447333
7	15177400	15179000	Colon	EnhAMe	Enhancers	ERV2-1-I_BT	LTR-ERVK	intergenic	gene-ILF3(dist=9972),gene-QTRT1(dist=9213)
7	40779400	40779800	Colon	EnhAMe	Enhancers	ERV2-2B_BT-I	LTR-ERVK	intergenic	gene-OR2B11(dist=25275),gene-LOC112447546(dist=6778)
7	40779600	40780400	Cecum	EnhAMe	Enhancers	ERV2-2B_BT-I	LTR-ERVK	intergenic	gene-OR2B11(dist=25475),gene-LOC112447546(dist=6178)
7	40779600	40780400	Jejunum	EnhAMe	Enhancers	ERV2-2B_BT-I	LTR-ERVK	intergenic	gene-OR2B11(dist=25475),gene-LOC112447546(dist=6178)
7	51487600	51488000	Lung	EnhAMe	Enhancers	ERV2-1C-LTR_BT	LTR-ERVK	intronic	gene-PFDN1
7	59182400	59182600	Colon	EnhAMe	Enhancers	BTLTR1D	LTR-ERVK	intergenic	gene-C7H5orf46(dist=35517),gene-SPINK5(dist=139453)
7	62719800	62720000	Spleen	EnhAMe	Enhancers	ERV2-1-I_BT	LTR-ERVK	intronic	gene-FAT2,gene-SLC36A1
7	62719800	62720200	Lung	EnhAMe	Enhancers	ERV2-1-I_BT	LTR-ERVK	intronic	gene-FAT2,gene-SLC36A1
7	62721000	62721200	Spleen	EnhAMe	Enhancers	ERV2-1-I_BT	LTR-ERVK	exonic	gene-BERV-K1
7	62721000	62721400	Cecum	EnhAMe	Enhancers	ERV2-1-I_BT	LTR-ERVK	exonic	gene-BERV-K1
7	62721000	62721400	Colon	EnhAMe	Enhancers	ERV2-1-I_BT	LTR-ERVK	exonic	gene-BERV-K1
7	62721000	62721400	Lung	EnhAMe	Enhancers	ERV2-1-I_BT	LTR-ERVK	exonic	gene-BERV-K1
7	68205600	68205800	Liver	EnhAMe	Enhancers	LTR46_BT	LTR-ERVK	intronic	gene-HAVCR1
7	74181400	74181600	Lung	EnhAMe	Enhancers	BTLTR1C	LTR-ERVK	intergenic	gene-GABRG2(dist=279942),gene-CCNG1(dist=934344)
7	79142200	79143200	Jejunum	EnhAMe	Enhancers	BTLTR1B1	LTR-ERVK	intronic	gene-LOC112447478
7	96220600	96220800	Cecum	EnhAMe	Enhancers	ERV2-1C-LTR_BT	LTR-ERVK	intergenic	gene-ERAP1(dist=16438),gene-ERAP2(dist=83422)
8	509400	509800	Abomasum	EnhAMe	Enhancers	BTLTR1E	LTR-ERVK	intronic	gene-ANXA10
8	509600	510000	Duodenum	EnhAMe	Enhancers	BTLTR1E	LTR-ERVK	intronic	gene-ANXA10
8	38601000	38601200	Abomasum	EnhAMe	Enhancers	BTLTR1E2	LTR-ERVK	UTR5	gene-IL33
8	48733200	48733400	Abomasum	EnhAMe	Enhancers	ERV2-1-LTR_BT	LTR-ERVK	intergenic	gene-LOC783838(dist=81821),gene-TMC1(dist=157104)
8	71377000	71377200	Jejunum	EnhAMe	Enhancers	ERV2-1B-LTR_BT	LTR-ERVK	intergenic	gene-LOC539009(dist=9576),gene-ADAMDEC1(dist=119792)
8	75050200	75050400	Cecum	EnhAMe	Enhancers	ERV2-1B-LTR_BT	LTR-ERVK	intergenic	gene-CHMP5(dist=3089),gene-NFX1(dist=7649)
8	75050200	75050600	Colon	EnhAMe	Enhancers	ERV2-1B-LTR_BT	LTR-ERVK	intergenic	gene-CHMP5(dist=3089),gene-NFX1(dist=7449)
8	79084200	79084600	Lung	EnhAMe	Enhancers	ERV2-1C-LTR_BT	LTR-ERVK	intergenic	gene-AGTPBP1(dist=28869),gene-NAA35(dist=83119)
8	79084400	79084600	Abomasum	EnhAMe	Enhancers	ERV2-1C-LTR_BT	LTR-ERVK	intergenic	gene-AGTPBP1(dist=29069),gene-NAA35(dist=83119)
8	79084400	79084600	Colon	EnhAMe	Enhancers	ERV2-1C-LTR_BT	LTR-ERVK	intergenic	gene-AGTPBP1(dist=29069),gene-NAA35(dist=83119)
8	83086800	83087800	Colon	EnhAMe	Enhancers	BTLTR1	LTR-ERVK	intergenic	gene-SLC35D2(dist=1000),gene-ZNF367(dist=1701)
8	91063800	91064200	Colon	EnhAMe	Enhancers	BTLTR1B	LTR-ERVK	intronic	gene-LOC530653
8	91064000	91064200	Cecum	EnhAMe	Enhancers	BTLTR1B	LTR-ERVK	intronic	gene-LOC530653
8	103000000	103000000	Jejunum	EnhAMe	Enhancers	BTLTR1E1	LTR-ERVK	intronic	gene-C8H9orf43
8	103000000	103000000	Lung	EnhAMe	Enhancers	BTLTR1E1	LTR-ERVK	exonic	gene-C8H9orf43
9	12901200	12901400	Lung	EnhAMe	Enhancers	ERV2-1-I_BT	LTR-ERVK	intergenic	gene-LOC104972961(dist=58847),gene-CGAS(dist=30976)
9	12902600	12903000	Cecum	EnhAMe	Enhancers	ERV2-1-I_BT	LTR-ERVK	intergenic	gene-LOC104972961(dist=60247),gene-CGAS(dist=29376)
9	12902600	12903200	Colon	EnhAMe	Enhancers	ERV2-1-I_BT	LTR-ERVK	intergenic	gene-LOC104972961(dist=60247),gene-CGAS(dist=29176)
9	16753800	16754000	Lung	EnhAMe	Enhancers	BTLTR1F	LTR-ERVK	intergenic	gene-IMPG1(dist=1031388),gene-HTR1B(dist=334667)
9	23923400	23923800	Abomasum	EnhAMe	Enhancers	ERV2-1C-LTR_BT	LTR-ERVK	intergenic	gene-KIAA0408(dist=61596),gene-ECHDC1(dist=23752)
9	23923400	23924000	Cecum	EnhAMe	Enhancers	ERV2-1C-LTR_BT	LTR-ERVK	intergenic	gene-KIAA0408(dist=61596),gene-ECHDC1(dist=23552)
9	23923400	23924000	Lung	EnhAMe	Enhancers	ERV2-1C-LTR_BT	LTR-ERVK	intergenic	gene-KIAA0408(dist=61596),gene-ECHDC1(dist=23552)
9	23923400	23924400	Colon	EnhAMe	Enhancers	ERV2-1C-LTR_BT	LTR-ERVK	intergenic	gene-KIAA0408(dist=61596),gene-ECHDC1(dist=23152)
9	23923400	23924400	Duodenum	EnhAMe	Enhancers	ERV2-1C-LTR_BT	LTR-ERVK	intergenic	gene-KIAA0408(dist=61596),gene-ECHDC1(dist=23152)
9	23923600	23924200	Jejunum	EnhAMe	Enhancers	ERV2-1C-LTR_BT	LTR-ERVK	intergenic	gene-KIAA0408(dist=61796),gene-ECHDC1(dist=23352)
9	23923800	23924000	Ileum	EnhAMe	Enhancers	ERV2-1C-LTR_BT	LTR-ERVK	intergenic	gene-KIAA0408(dist=61996),gene-ECHDC1(dist=23552)
9	25437400	25437600	Cortex	EnhAMe	Enhancers	ERV2-3-LTR_BT	LTR-ERVK	intronic	gene-NCOA7
9	33343400	33344000	Cecum	EnhAMe	Enhancers	ERV2-1C-LTR_BT	LTR-ERVK	intergenic	gene-DCBLD1(dist=17766),gene-ROS1(dist=20125)
9	33343400	33344000	Colon	EnhAMe	Enhancers	ERV2-1C-LTR_BT	LTR-ERVK	intergenic	gene-DCBLD1(dist=17766),gene-ROS1(dist=20125)
9	39789800	39790400	Jejunum	EnhAMe	Enhancers	BTLTR1F	LTR-ERVK	intergenic	gene-SLC22A16(dist=1503),gene-DDO(dist=5961)
9	101000000	101000000	Colon	EnhAMe	Enhancers	BTLTR1	LTR-ERVK	intergenic	gene-MPC1(dist=18188),gene-RPS6KA2(dist=4603)
9	101000000	101000000	Jejunum	EnhAMe	Enhancers	BTLTR1	LTR-ERVK	intergenic	gene-MPC1(dist=18188),gene-RPS6KA2(dist=4603)
9	104000000	104000000	Lung	EnhAMe	Enhancers	BTLTR1B	LTR-ERVK	intergenic	gene-ERMARD(dist=197017),gene-DLL1(dist=147404)
X	578800	579000	Cecum	EnhAMe	Enhancers	ERV2-1C-LTR_BT	LTR-ERVK	intronic	gene-SLC6A14
X	579400	579800	Cecum	EnhAMe	Enhancers	ERV2-1C-LTR_BT	LTR-ERVK	intronic	gene-SLC6A14
X	579600	579800	Colon	EnhAMe	Enhancers	ERV2-1C-LTR_BT	LTR-ERVK	intronic	gene-SLC6A14
X	29767000	29767400	Colon	EnhAMe	Enhancers	ERV2-1B-LTR_BT	LTR-ERVK	intergenic	gene-LOC781895(dist=115285),gene-FMR1(dist=857930)
X	38198400	38199000	Colon	EnhAMe	Enhancers	ERV2-1C-LTR_BT	LTR-ERVK	intergenic	gene-LOC112441479(dist=100959),gene-LOC526488(dist=15962)
X	38198600	38199400	Cecum	EnhAMe	Enhancers	ERV2-1C-LTR_BT	LTR-ERVK	intergenic	gene-LOC112441479(dist=101159),gene-LOC526488(dist=15562)
X	38198800	38199000	Jejunum	EnhAMe	Enhancers	ERV2-1C-LTR_BT	LTR-ERVK	intergenic	gene-LOC112441479(dist=101359),gene-LOC526488(dist=15962)
X	38199400	38199600	Colon	EnhAMe	Enhancers	ERV2-1C-LTR_BT	LTR-ERVK	intergenic	gene-LOC112441479(dist=101959),gene-LOC526488(dist=15362)
X	39596400	39596600	Colon	EnhAMe	Enhancers	LTR2_BT	LTR-ERVK	intergenic	gene-PABPC5(dist=254362),gene-MGC134179(dist=38126)
X	39597000	39597200	Liver	EnhAMe	Enhancers	LTR2_BT	LTR-ERVK	intergenic	gene-PABPC5(dist=254962),gene-MGC134179(dist=37526)
X	76000800	76001800	Jejunum	EnhAMe	Enhancers	LTR46_BT	LTR-ERVK	intronic	gene-ABCB7
X	82103800	82104000	Abomasum	EnhAMe	Enhancers	BTLTR1E1	LTR-ERVK	intronic	gene-OPHN1
X	102000000	102000000	Abomasum	EnhAMe	Enhancers	BTLTR1C	LTR-ERVK	intronic	gene-CASK
X	102000000	102000000	Lung	EnhAMe	Enhancers	BTLTR1C	LTR-ERVK	intronic	gene-CASK
1	240800	241000	Adipose	EnhAWk	Enhancers	BTLTR1E	LTR-ERVK	intergenic	NONE(dist=NONE),gene-LOC618219(dist=19032)
1	634800	636400	Rumen	EnhAWk	Enhancers	BTLTR1F	LTR-ERVK	intergenic	gene-LOC618212(dist=27615),gene-CLIC6(dist=127636)
1	35601600	35601800	Abomasum	EnhAWk	Enhancers	BTLTR1J	LTR-ERVK	intergenic	gene-POU1F1(dist=165935),gene-HTR1F(dist=395545)
1	57171000	57171200	Abomasum	EnhAWk	Enhancers	ERV2-1B-LTR_BT	LTR-ERVK	intronic	gene-CD200
1	69370200	69370600	Ileum	EnhAWk	Enhancers	BTLTR1F	LTR-ERVK	intergenic	gene-MUC13(dist=12726),gene-HEG1(dist=47350)
1	69371000	69371400	Ileum	EnhAWk	Enhancers	BTLTR1F	LTR-ERVK	intergenic	gene-MUC13(dist=13526),gene-HEG1(dist=46550)
1	71288200	71289800	Rumen	EnhAWk	Enhancers	BTLTR1B1	LTR-ERVK	intronic	gene-PAK2
1	71289400	71289600	Lung	EnhAWk	Enhancers	BTLTR1B1	LTR-ERVK	intronic	gene-PAK2
1	71289600	71289800	Abomasum	EnhAWk	Enhancers	BTLTR1B1	LTR-ERVK	intronic	gene-PAK2
1	71289600	71289800	Liver	EnhAWk	Enhancers	BTLTR1B1	LTR-ERVK	intronic	gene-PAK2
1	75540800	75541000	Rumen	EnhAWk	Enhancers	BTLTR1B	LTR-ERVK	intergenic	gene-FGF12(dist=252473),gene-LOC112448255(dist=228095)
1	83626200	83626400	Jejunum	EnhAWk	Enhancers	ERV2-3-I_BT	LTR-ERVK	intergenic	gene-KLHL6(dist=24680),gene-MCF2L2(dist=26994)
1	83664200	83664800	Rumen	EnhAWk	Enhancers	ERV2-2B_BT-I	LTR-ERVK	intronic	gene-MCF2L2
1	86495600	86495800	Abomasum	EnhAWk	Enhancers	ERV2-1B-LTR_BT	LTR-ERVK	intergenic	gene-TTC14(dist=112885),gene-PEX5L(dist=532784)
1	91381000	91381400	Adipose	EnhAWk	Enhancers	LTR46_BT	LTR-ERVK	intergenic	gene-TBL1XR1(dist=1172556),gene-NAALADL2(dist=47123)
1	122000000	122000000	Rumen	EnhAWk	Enhancers	BTLTR1C	LTR-ERVK	intergenic	gene-PLSCR5(dist=28018),gene-PLSCR2(dist=39475)
1	122000000	122000000	Ileum	EnhAWk	Enhancers	BTLTR1F	LTR-ERVK	intronic	gene-PLSCR2
1	131000000	131000000	Abomasum	EnhAWk	Enhancers	ERV2-1-LTR_BT	LTR-ERVK	intergenic	gene-DZIP1L(dist=7577),gene-CLDN18(dist=33475)
1	136000000	136000000	Ileum	EnhAWk	Enhancers	BTLTR1	LTR-ERVK	intergenic	gene-TOPBP1(dist=4282),gene-CDV3(dist=38528)
1	139000000	139000000	Abomasum	EnhAWk	Enhancers	BTLTR1F	LTR-ERVK	intergenic	gene-ATP2C1(dist=192024),gene-PSMG1(dist=6912)
1	143000000	143000000	Lung	EnhAWk	Enhancers	BTLTR1B1	LTR-ERVK	intergenic	gene-ABCG1(dist=8740),gene-TFF3(dist=1064)
1	144000000	144000000	Lung	EnhAWk	Enhancers	ERV2-1-I_BT	LTR-ERVK	intronic	gene-RRP1
1	144000000	144000000	Spleen	EnhAWk	Enhancers	ERV2-1-I_BT	LTR-ERVK	intronic	gene-RRP1
1	144000000	144000000	Cecum	EnhAWk	Enhancers	BTLTR1B1	LTR-ERVK	intergenic	gene-GATD3A(dist=21940),gene-ICOSLG(dist=42779)
1	144000000	144000000	Duodenum	EnhAWk	Enhancers	BTLTR1B1	LTR-ERVK	intergenic	gene-GATD3A(dist=21940),gene-ICOSLG(dist=42779)
1	144000000	144000000	Ileum	EnhAWk	Enhancers	BTLTR1B1	LTR-ERVK	intergenic	gene-GATD3A(dist=21940),gene-ICOSLG(dist=42779)
1	144000000	144000000	Jejunum	EnhAWk	Enhancers	BTLTR1B1	LTR-ERVK	intergenic	gene-GATD3A(dist=21940),gene-ICOSLG(dist=42779)
1	144000000	144000000	Adipose	EnhAWk	Enhancers	BTLTR1B1	LTR-ERVK	intergenic	gene-GATD3A(dist=22140),gene-ICOSLG(dist=42779)
1	144000000	144000000	Lung	EnhAWk	Enhancers	BTLTR1B1	LTR-ERVK	intergenic	gene-GATD3A(dist=22140),gene-ICOSLG(dist=42779)
1	148000000	148000000	Abomasum	EnhAWk	Enhancers	BTLTR1J4	LTR-ERVK	intronic	gene-SETD4
1	153000000	153000000	Adipose	EnhAWk	Enhancers	ERV2-1-LTR_BT	LTR-ERVK	intergenic	gene-COLQ(dist=35880),gene-HACL1(dist=14611)
1	153000000	153000000	Cecum	EnhAWk	Enhancers	ERV2-1-LTR_BT	LTR-ERVK	intergenic	gene-COLQ(dist=36080),gene-HACL1(dist=14611)
1	153000000	153000000	Lung	EnhAWk	Enhancers	ERV2-1-LTR_BT	LTR-ERVK	intergenic	gene-COLQ(dist=36080),gene-HACL1(dist=14611)
1	153000000	153000000	Cecum	EnhAWk	Enhancers	ERV2-1-LTR_BT	LTR-ERVK	intergenic	gene-COLQ(dist=37080),gene-HACL1(dist=13611)
1	153000000	153000000	Colon	EnhAWk	Enhancers	ERV2-1-LTR_BT	LTR-ERVK	intergenic	gene-COLQ(dist=37080),gene-HACL1(dist=13611)
1	153000000	153000000	Lung	EnhAWk	Enhancers	ERV2-1-LTR_BT	LTR-ERVK	intergenic	gene-COLQ(dist=37080),gene-HACL1(dist=13611)
10	4324800	4325000	Cecum	EnhAWk	Enhancers	BTLTR1	LTR-ERVK	intergenic	gene-CCDC112(dist=7192),gene-FEM1C(dist=33172)
10	22930000	22930600	Adipose	EnhAWk	Enhancers	ERV2-1B-LTR_BT	LTR-ERVK	intronic	gene-LOC100336282
10	23011400	23011600	Liver	EnhAWk	Enhancers	LTR2_BT	LTR-ERVK	intronic	gene-LOC100336282
10	26128400	26128600	Cecum	EnhAWk	Enhancers	BTLTR1C	LTR-ERVK	intergenic	gene-METTL17(dist=3183),gene-RNASE2(dist=42242)
10	26754800	26755600	Rumen	EnhAWk	Enhancers	ERV2-1-I_BT	LTR-ERVK	intergenic	gene-TEP1(dist=6219),gene-PARP2(dist=8555)
10	26754800	26756400	Jejunum	EnhAWk	Enhancers	ERV2-1-I_BT	LTR-ERVK	intergenic	gene-TEP1(dist=6219),gene-PARP2(dist=7755)
10	26757200	26757400	Jejunum	EnhAWk	Enhancers	ERV2-1-I_BT	LTR-ERVK	intergenic	gene-TEP1(dist=8619),gene-PARP2(dist=6755)
10	26757400	26757600	Ileum	EnhAWk	Enhancers	ERV2-1-I_BT	LTR-ERVK	intergenic	gene-TEP1(dist=8819),gene-PARP2(dist=6555)
10	26757400	26758400	Adipose	EnhAWk	Enhancers	ERV2-1-I_BT	LTR-ERVK	intergenic	gene-TEP1(dist=8819),gene-PARP2(dist=5755)
10	26757800	26758000	Jejunum	EnhAWk	Enhancers	ERV2-1-I_BT	LTR-ERVK	intergenic	gene-TEP1(dist=9219),gene-PARP2(dist=6155)
10	26757800	26758000	Jejunum	EnhAWk	Enhancers	ERV2-1-I_BT	LTR-ERVK	intergenic	gene-TEP1(dist=9219),gene-PARP2(dist=6155)
10	26758200	26758400	Abomasum	EnhAWk	Enhancers	ERV2-1-I_BT	LTR-ERVK	intergenic	gene-TEP1(dist=9619),gene-PARP2(dist=5755)
10	26758200	26758400	Ileum	EnhAWk	Enhancers	ERV2-1-I_BT	LTR-ERVK	intergenic	gene-TEP1(dist=9619),gene-PARP2(dist=5755)
10	26759400	26760600	Abomasum	EnhAWk	Enhancers	ERV2-1-I_BT	LTR-ERVK	intergenic	gene-TEP1(dist=10819),gene-PARP2(dist=3555)
10	26761200	26762400	Jejunum	EnhAWk	Enhancers	ERV2-1-I_BT	LTR-ERVK	intergenic	gene-TEP1(dist=12619),gene-PARP2(dist=1755)
10	26761200	26762400	Spleen	EnhAWk	Enhancers	ERV2-1-I_BT	LTR-ERVK	intergenic	gene-TEP1(dist=12619),gene-PARP2(dist=1755)
10	26761800	26762000	Cecum	EnhAWk	Enhancers	ERV2-1-I_BT	LTR-ERVK	intergenic	gene-TEP1(dist=13219),gene-PARP2(dist=2155)
10	67566800	67567000	Adipose	EnhAWk	Enhancers	BTLTR1B	LTR-ERVK	intergenic	gene-MAPK1IP1L(dist=28476),gene-LGALS3(dist=44547)
10	67566800	67567000	Cecum	EnhAWk	Enhancers	BTLTR1B	LTR-ERVK	intergenic	gene-MAPK1IP1L(dist=28476),gene-LGALS3(dist=44547)
10	67566800	67567000	Colon	EnhAWk	Enhancers	BTLTR1B	LTR-ERVK	intergenic	gene-MAPK1IP1L(dist=28476),gene-LGALS3(dist=44547)
10	77106200	77106400	Jejunum	EnhAWk	Enhancers	BTLTR1B	LTR-ERVK	intergenic	gene-RAB15(dist=9639),gene-FNTB(dist=3059)
10	82141800	82142200	Rumen	EnhAWk	Enhancers	BTLTR1B	LTR-ERVK	intronic	gene-ADAM21-2
10	88793200	88794000	Abomasum	EnhAWk	Enhancers	BTLTR1E1	LTR-ERVK	intergenic	gene-SPTLC2(dist=8650),gene-ALKBH1(dist=29316)
10	101000000	101000000	Abomasum	EnhAWk	Enhancers	BTLTR1B1	LTR-ERVK	intronic	gene-FOXN3
10	101000000	101000000	Cecum	EnhAWk	Enhancers	BTLTR1B1	LTR-ERVK	intronic	gene-FOXN3
11	3640600	3641200	Abomasum	EnhAWk	Enhancers	ERV2-1C-LTR_BT	LTR-ERVK	intergenic	gene-CNGA3(dist=18288),gene-INPP4A(dist=9802)
11	7106600	7107200	Jejunum	EnhAWk	Enhancers	BTLTR1D2	LTR-ERVK	intronic	gene-IL1RL1
11	14258000	14258800	Adipose	EnhAWk	Enhancers	ERV2-1-I_BT	LTR-ERVK	intergenic	gene-XDH(dist=33460),gene-SRD5A2(dist=63414)
11	14258200	14258400	Cecum	EnhAWk	Enhancers	ERV2-1-I_BT	LTR-ERVK	intergenic	gene-XDH(dist=33660),gene-SRD5A2(dist=63814)
11	14258400	14259200	Liver	EnhAWk	Enhancers	ERV2-1-I_BT	LTR-ERVK	intergenic	gene-XDH(dist=33860),gene-SRD5A2(dist=63014)
11	14259200	14259400	Cecum	EnhAWk	Enhancers	ERV2-1-I_BT	LTR-ERVK	intergenic	gene-XDH(dist=34660),gene-SRD5A2(dist=62814)
11	21297800	21298200	Rumen	EnhAWk	Enhancers	BTLTR1B	LTR-ERVK	intergenic	gene-ARHGEF33(dist=1017),gene-SOS1(dist=5606)
11	30092800	30093000	Abomasum	EnhAWk	Enhancers	BTLTR1F	LTR-ERVK	intergenic	gene-TRNAG-UCC-26(dist=109583),gene-MSH6(dist=29050)
11	30127400	30127600	Liver	EnhAWk	Enhancers	LTR2C_BT	LTR-ERVK	intronic	gene-MSH6
11	30127400	30128600	Abomasum	EnhAWk	Enhancers	LTR2C_BT	LTR-ERVK	intronic	gene-MSH6
11	43453200	43453600	Rumen	EnhAWk	Enhancers	BTLTR1J	LTR-ERVK	intergenic	gene-BCL11A(dist=142884),gene-LOC107132928(dist=21760)
11	47192800	47193400	Abomasum	EnhAWk	Enhancers	ERV2-1B-LTR_BT	LTR-ERVK	intergenic	gene-PAX8(dist=211529),gene-LOC112448784(dist=24735)
11	49436400	49436600	Duodenum	EnhAWk	Enhancers	ERV2-1-I_BT	LTR-ERVK	intronic	gene-VAMP8
11	49580000	49580200	Cecum	EnhAWk	Enhancers	ERV2-1-LTR_BT	LTR-ERVK	intergenic	gene-SH2D6(dist=15208),gene-CAPG(dist=7662)
11	49580000	49580200	Colon	EnhAWk	Enhancers	ERV2-1-LTR_BT	LTR-ERVK	intergenic	gene-SH2D6(dist=15208),gene-CAPG(dist=7662)
11	60764600	60765200	Ileum	EnhAWk	Enhancers	BTLTR1	LTR-ERVK	intergenic	gene-B3GNT2(dist=8060),gene-TMEM17(dist=238538)
11	66785400	66786200	Spleen	EnhAWk	Enhancers	LTR7_BT	LTR-ERVK	intergenic	gene-CNRIP1(dist=55885),gene-PLEK(dist=1438)
11	68056000	68056200	Rumen	EnhAWk	Enhancers	BTLTR1C	LTR-ERVK	intergenic	gene-AAK1(dist=64649),gene-ANXA4(dist=68689)
11	68115400	68116200	Abomasum	EnhAWk	Enhancers	LTR2C_BT	LTR-ERVK	intergenic	gene-AAK1(dist=124049),gene-ANXA4(dist=8689)
11	68115400	68116200	Liver	EnhAWk	Enhancers	LTR2C_BT	LTR-ERVK	intergenic	gene-AAK1(dist=124049),gene-ANXA4(dist=8689)
11	69327800	69328200	Rumen	EnhAWk	Enhancers	ERV2-1C-LTR_BT	LTR-ERVK	intronic	gene-LCLAT1
11	78454200	78454800	Liver	EnhAWk	Enhancers	LTR7_BT	LTR-ERVK	intergenic	gene-RHOB(dist=53600),gene-PUM2(dist=31970)
11	82935600	82935800	Jejunum	EnhAWk	Enhancers	ERV2-2-I_BT	LTR-ERVK	intronic	gene-NBAS
11	84256800	84257000	Abomasum	EnhAWk	Enhancers	ERV2-2-I_BT	LTR-ERVK	intergenic	gene-LOC782101(dist=165058),gene-TRIB2(dist=980100)
11	86795000	86795200	Ileum	EnhAWk	Enhancers	BTLTR1	LTR-ERVK	intergenic	gene-KCNF1(dist=8573),gene-PDIA6(dist=64409)
11	102000000	102000000	Ileum	EnhAWk	Enhancers	BTLTR1	LTR-ERVK	intronic	gene-MED27
11	102000000	102000000	Ileum	EnhAWk	Enhancers	BTLTR1	LTR-ERVK	intronic	gene-MED27
11	105000000	105000000	Lung	EnhAWk	Enhancers	ERV2-1-LTR_BT	LTR-ERVK	intergenic	gene-VAV2(dist=12379),gene-BRD3OS(dist=7423)
12	28675400	28675600	Liver	EnhAWk	Enhancers	BTLTR1	LTR-ERVK	intronic	gene-ZAR1L
12	30884000	30884400	Duodenum	EnhAWk	Enhancers	BTLTR1	LTR-ERVK	intergenic	gene-UBL3(dist=29940),gene-TRNAG-CCC-75(dist=27454)
12	30884200	30884400	Spleen	EnhAWk	Enhancers	BTLTR1	LTR-ERVK	intergenic	gene-UBL3(dist=30140),gene-TRNAG-CCC-75(dist=27454)
12	30885000	30885200	Duodenum	EnhAWk	Enhancers	BTLTR1	LTR-ERVK	intergenic	gene-UBL3(dist=30940),gene-TRNAG-CCC-75(dist=26654)
12	73139400	73139600	Adipose	EnhAWk	Enhancers	ERV2-1B-LTR_BT	LTR-ERVK	intronic	gene-DNAJC3
12	85156800	85157000	Adipose	EnhAWk	Enhancers	BTLTR1	LTR-ERVK	intergenic	gene-COL4A2(dist=2773),gene-RAB20(dist=13092)
12	85156800	85157000	Cecum	EnhAWk	Enhancers	BTLTR1	LTR-ERVK	intergenic	gene-COL4A2(dist=2773),gene-RAB20(dist=13092)
12	85496600	85496800	Cerebellum	EnhAWk	Enhancers	BTLTR1B	LTR-ERVK	intronic	gene-ARHGEF7
12	86331200	86331400	Lung	EnhAWk	Enhancers	ERV2-1-LTR_BT	LTR-ERVK	intronic	gene-ATP11A
12	86332400	86332600	Hypothalamus	EnhAWk	Enhancers	ERV2-1-LTR_BT	LTR-ERVK	intronic	gene-ATP11A
13	38538400	38539000	Jejunum	EnhAWk	Enhancers	ERV2-2B_BT-LTR	LTR-ERVK	intronic	gene-POLR3F
13	43390200	43390800	Liver	EnhAWk	Enhancers	BTLTR1B1	LTR-ERVK	intronic	gene-LOC782061
13	43390400	43390600	Ileum	EnhAWk	Enhancers	BTLTR1B1	LTR-ERVK	intronic	gene-LOC782061
13	43391400	43391600	Liver	EnhAWk	Enhancers	BTLTR1B1	LTR-ERVK	intronic	gene-LOC782061
13	43589200	43589400	Abomasum	EnhAWk	Enhancers	BTLTR1	LTR-ERVK	intergenic	gene-AKR1C3(dist=1763),gene-AKR1C4(dist=27522)
13	43589200	43589400	Liver	EnhAWk	Enhancers	BTLTR1	LTR-ERVK	intergenic	gene-AKR1C3(dist=1763),gene-AKR1C4(dist=27522)
13	45062600	45062800	Ileum	EnhAWk	Enhancers	BTLTR1B	LTR-ERVK	intergenic	gene-LOC112449302(dist=241522),gene-PITRM1(dist=18339)
13	51719600	51720400	Abomasum	EnhAWk	Enhancers	LTR7_BT	LTR-ERVK	intronic	gene-ATRN
13	51720200	51720600	Adipose	EnhAWk	Enhancers	LTR7_BT	LTR-ERVK	intronic	gene-ATRN
13	59914600	59914800	Cecum	EnhAWk	Enhancers	ERV2-1-I_BT	LTR-ERVK	intronic	gene-RAD21L1
13	59914600	59915000	Jejunum	EnhAWk	Enhancers	ERV2-1-I_BT	LTR-ERVK	intronic	gene-RAD21L1
13	72925800	72928400	Lung	EnhAWk	Enhancers	ERV2-1B-LTR_BT	LTR-ERVK	intronic	gene-SERINC3
13	72927200	72927400	Jejunum	EnhAWk	Enhancers	ERV2-1B-LTR_BT	LTR-ERVK	intronic	gene-SERINC3
13	72927200	72927400	Spleen	EnhAWk	Enhancers	ERV2-1B-LTR_BT	LTR-ERVK	intronic	gene-SERINC3
13	72927200	72927600	Ileum	EnhAWk	Enhancers	ERV2-1B-LTR_BT	LTR-ERVK	intronic	gene-SERINC3
13	72927800	72928200	Ileum	EnhAWk	Enhancers	ERV2-1B-LTR_BT	LTR-ERVK	intronic	gene-SERINC3
13	72928000	72928200	Spleen	EnhAWk	Enhancers	ERV2-1B-LTR_BT	LTR-ERVK	intronic	gene-SERINC3
13	73522600	73522800	Rumen	EnhAWk	Enhancers	ERV2-1-I_BT	LTR-ERVK	intergenic	gene-LOC100850808(dist=3839),gene-LOC407163(dist=15398)
14	520200	520400	Jejunum	EnhAWk	Enhancers	LTR2C_BT	LTR-ERVK	intergenic	gene-VPS28(dist=7392),gene-SLC39A4(dist=13517)
14	1437400	1437600	Ileum	EnhAWk	Enhancers	BTLTR1	LTR-ERVK	intergenic	gene-LY6E(dist=11045),gene-LOC787628(dist=67875)
14	1636000	1636200	Colon	EnhAWk	Enhancers	BTLTR1B1	LTR-ERVK	UTR3	gene-LOC100848939
14	9534200	9534400	Rumen	EnhAWk	Enhancers	BTLTR1B1	LTR-ERVK	intergenic	gene-EFR3A(dist=380183),gene-ADCY8(dist=219790)
14	21009600	21011800	Cecum	EnhAWk	Enhancers	BTLTR1	LTR-ERVK	intergenic	gene-SNTG1(dist=309931),gene-PCMTD1(dist=1650)
14	21373400	21373600	Abomasum	EnhAWk	Enhancers	BTLTR1B1	LTR-ERVK	intergenic	gene-ST18(dist=124442),gene-ALKAL1(dist=74557)
14	54787800	54788000	Cecum	EnhAWk	Enhancers	BTLTR1B	LTR-ERVK	intronic	gene-SYBU
15	16416200	16416600	Cecum	EnhAWk	Enhancers	ERV2-1C-LTR_BT	LTR-ERVK	intronic	gene-GUCY1A2
15	50373600	50374400	Rumen	EnhAWk	Enhancers	BTLTR1F	LTR-ERVK	intergenic	gene-LOC526621(dist=3293),gene-LOC112441493(dist=6468)
15	50602400	50602600	Jejunum	EnhAWk	Enhancers	BTLTR1E1	LTR-ERVK	intergenic	gene-LOC521676(dist=2591),gene-LOC618075(dist=16947)
15	51406000	51406600	Adipose	EnhAWk	Enhancers	ERV2-1C-LTR_BT	LTR-ERVK	exonic	gene-LOC100336836
15	56136000	56136200	Ileum	EnhAWk	Enhancers	BTLTR1	LTR-ERVK	intergenic	gene-LOC112441534(dist=35255),gene-TSKU(dist=43363)
15	57767800	57768200	Adipose	EnhAWk	Enhancers	BTLTR1D2	LTR-ERVK	intronic	gene-BBOX1
15	61061800	61062000	Cecum	EnhAWk	Enhancers	LTR2B_BT	LTR-ERVK	downstream	gene-ARL14EP
15	62886400	62886600	Cecum	EnhAWk	Enhancers	BTLTR1	LTR-ERVK	intronic	gene-LOC614914
15	65438400	65438600	Adipose	EnhAWk	Enhancers	BTLTR1B1	LTR-ERVK	intronic	gene-PDHX
15	65439400	65439600	Abomasum	EnhAWk	Enhancers	BTLTR1B1	LTR-ERVK	intronic	gene-PDHX
15	65439400	65439600	Cecum	EnhAWk	Enhancers	BTLTR1B1	LTR-ERVK	intronic	gene-PDHX
15	69368800	69369200	Ileum	EnhAWk	Enhancers	BTLTR1B1	LTR-ERVK	intergenic	NONE(dist=NONE),gene-LRRC4C(dist=1028730)
15	70916000	70916200	Lung	EnhAWk	Enhancers	BTLTR1	LTR-ERVK	ncRNA_intronic	gene-LRRC4C-2
15	80587600	80587800	Ileum	EnhAWk	Enhancers	BTLTR1B1	LTR-ERVK	intronic	gene-PRG3
15	80603400	80604400	Rumen	EnhAWk	Enhancers	BTLTR1B1	LTR-ERVK	intergenic	gene-LOC781990(dist=2213),gene-PRG3-2(dist=12624)
15	82175400	82175600	Liver	EnhAWk	Enhancers	ERV2-1B-LTR_BT	LTR-ERVK	intergenic	gene-LOC112441481(dist=14472),gene-GLYATL2(dist=4881)
15	83437400	83437600	Abomasum	EnhAWk	Enhancers	LTR3_BT	LTR-ERVK	UTR3	gene-LOC101908134
16	2568200	2569200	Ileum	EnhAWk	Enhancers	BTLTR1	LTR-ERVK	intergenic	gene-LRRN2(dist=206771),gene-NFASC(dist=36283)
16	3694600	3694800	Ileum	EnhAWk	Enhancers	BTLTR1	LTR-ERVK	intergenic	gene-SLC26A9(dist=23975),gene-RAB7B(dist=34199)
16	3753000	3754800	Adipose	EnhAWk	Enhancers	BTLTR1	LTR-ERVK	intronic	gene-RAB7B
16	3753200	3755200	Abomasum	EnhAWk	Enhancers	BTLTR1	LTR-ERVK	intronic	gene-RAB7B
16	3753800	3754000	Colon	EnhAWk	Enhancers	BTLTR1	LTR-ERVK	intronic	gene-RAB7B
16	3753800	3754000	Lung	EnhAWk	Enhancers	BTLTR1	LTR-ERVK	intronic	gene-RAB7B
16	3753800	3754800	Cecum	EnhAWk	Enhancers	BTLTR1	LTR-ERVK	intronic	gene-RAB7B
16	5116600	5116800	Cecum	EnhAWk	Enhancers	BTLTR1B1	LTR-ERVK	intergenic	gene-LOC510860(dist=17890),gene-LOC515150(dist=25471)
16	5116600	5116800	Colon	EnhAWk	Enhancers	BTLTR1B1	LTR-ERVK	intergenic	gene-LOC510860(dist=17890),gene-LOC515150(dist=25471)
16	12579200	12579400	Lung	EnhAWk	Enhancers	ERV2-1B-LTR_BT	LTR-ERVK	intergenic	gene-RGS2-2(dist=150315),gene-RGS13(dist=16956)
16	23564600	23565800	Duodenum	EnhAWk	Enhancers	ERV2-1C-LTR_BT	LTR-ERVK	intronic	gene-BPNT1
16	24231000	24231200	Abomasum	EnhAWk	Enhancers	BTLTR1C	LTR-ERVK	intronic	gene-MARC2
16	24231000	24231200	Jejunum	EnhAWk	Enhancers	BTLTR1C	LTR-ERVK	intronic	gene-MARC2
16	29468000	29468800	Rumen	EnhAWk	Enhancers	ERV2-1C-LTR_BT	LTR-ERVK	intergenic	gene-PARP1(dist=61544),gene-STUM(dist=81170)
16	38867800	38868000	Cecum	EnhAWk	Enhancers	ERV2-1B-LTR_BT	LTR-ERVK	intronic	gene-FMO4
16	43174000	43174200	Adipose	EnhAWk	Enhancers	BTLTR1B1	LTR-ERVK	upstream	gene-PGD
16	43174000	43174200	Ileum	EnhAWk	Enhancers	BTLTR1B1	LTR-ERVK	upstream	gene-PGD
16	43175000	43175200	Abomasum	EnhAWk	Enhancers	BTLTR1B1	LTR-ERVK	intergenic	gene-PGD(dist=1684),gene-TRNAR-CCG-2(dist=3023)
16	43175000	43175200	Ileum	EnhAWk	Enhancers	BTLTR1B1	LTR-ERVK	intergenic	gene-PGD(dist=1684),gene-TRNAR-CCG-2(dist=3023)
16	53947000	53947200	Cerebellum	EnhAWk	Enhancers	BTLTR1B	LTR-ERVK	intergenic	gene-PRDM2(dist=25136),gene-PDPN(dist=63600)
17	311400	311800	Lung	EnhAWk	Enhancers	ERV2-1-I_BT	LTR-ERVK	intergenic	gene-TMEM192(dist=101311),gene-KLHL2(dist=27875)
17	767000	767200	Jejunum	EnhAWk	Enhancers	ERV2-1-I_BT	LTR-ERVK	intergenic	gene-CPE(dist=45555),gene-MIR2285J-1(dist=598620)
17	6202200	6202400	Cecum	EnhAWk	Enhancers	BTLTR1	LTR-ERVK	intronic	gene-FAM160A1
17	6202200	6202400	Liver	EnhAWk	Enhancers	BTLTR1	LTR-ERVK	intronic	gene-FAM160A1
17	43257000	43257600	Rumen	EnhAWk	Enhancers	BTLTR1B	LTR-ERVK	intergenic	gene-PDGFC(dist=777306),gene-CTSO(dist=98482)
17	52080000	52080200	Spleen	EnhAWk	Enhancers	LTR2_BT	LTR-ERVK	intergenic	gene-DDX55(dist=1108),gene-TMED2(dist=1739)
17	61898600	61898800	Ileum	EnhAWk	Enhancers	BTLTR1	LTR-ERVK	intronic	gene-HECTD4
17	62292400	62292600	Duodenum	EnhAWk	Enhancers	BTLTR1B1	LTR-ERVK	intergenic	gene-MAPKAPK5(dist=4354),gene-ALDH2(dist=7833)
17	63647200	63648000	Hypothalamus	EnhAWk	Enhancers	ERV2-3-LTR_BT	LTR-ERVK	intergenic	gene-MMAB(dist=7862),gene-UBE3B(dist=2233)
17	67363800	67364400	Adipose	EnhAWk	Enhancers	ERV2-1-I_BT	LTR-ERVK	intronic	gene-LOC101903015
17	67364000	67364400	Colon	EnhAWk	Enhancers	ERV2-1-I_BT	LTR-ERVK	intronic	gene-LOC101903015
17	67364200	67364400	Hypothalamus	EnhAWk	Enhancers	ERV2-1-I_BT	LTR-ERVK	intronic	gene-LOC101903015
17	71441600	71442000	Duodenum	EnhAWk	Enhancers	BTLTR1	LTR-ERVK	intergenic	gene-SUSD2(dist=7651),gene-GGT5(dist=1754)
17	71441800	71442800	Ileum	EnhAWk	Enhancers	BTLTR1	LTR-ERVK	downstream	gene-GGT5
17	71442600	71442800	Duodenum	EnhAWk	Enhancers	BTLTR1	LTR-ERVK	downstream	gene-GGT5
17	71442800	71443000	Hypothalamus	EnhAWk	Enhancers	BTLTR1	LTR-ERVK	downstream	gene-GGT5
18	4449600	4450000	Ileum	EnhAWk	Enhancers	ERV2-3-LTR_BT	LTR-ERVK	UTR3	gene-SYCE1L
18	7810400	7810600	Abomasum	EnhAWk	Enhancers	BTLTR1B	LTR-ERVK	intronic	gene-PKD1L2
18	36843000	36843600	Cecum	EnhAWk	Enhancers	ERV2-1B-LTR_BT	LTR-ERVK	intronic	gene-WWP2
18	45906600	45906800	Ileum	EnhAWk	Enhancers	BTLTR1	LTR-ERVK	intergenic	gene-FXYD5(dist=16520),gene-FAM187B(dist=29525)
18	48536400	48537000	Liver	EnhAWk	Enhancers	LTR3_BT	LTR-ERVK	downstream	gene-LGALS4
18	50060800	50061000	Cecum	EnhAWk	Enhancers	LTR2B_BT	LTR-ERVK	UTR3	gene-EGLN2
18	50060800	50061600	Abomasum	EnhAWk	Enhancers	LTR2B_BT	LTR-ERVK	UTR3	gene-EGLN2
18	50061400	50061800	Cecum	EnhAWk	Enhancers	LTR2B_BT	LTR-ERVK	downstream	gene-EGLN2
18	51788600	51789600	Jejunum	EnhAWk	Enhancers	BTLTR1E1	LTR-ERVK	downstream	gene-LOC616860
18	54743400	54745200	Abomasum	EnhAWk	Enhancers	BTLTR1F	LTR-ERVK	intronic	gene-SULT2A1
18	59507200	59507400	Abomasum	EnhAWk	Enhancers	BTLTR1F	LTR-ERVK	intronic	gene-LOC100299712
18	59514000	59514200	Jejunum	EnhAWk	Enhancers	ERV2-1-I_BT	LTR-ERVK	intronic	gene-LOC100299712
18	59514800	59515000	Jejunum	EnhAWk	Enhancers	ERV2-1-I_BT	LTR-ERVK	intronic	gene-LOC100299712
18	60546400	60546800	Abomasum	EnhAWk	Enhancers	ERV2-1C-LTR_BT	LTR-ERVK	intronic	gene-LOC100336208,gene-LOC104968479
18	62676000	62676200	Spleen	EnhAWk	Enhancers	ERV2-1-I_BT	LTR-ERVK	intronic	gene-KIR3DL2,gene-KIR3DS1
19	5126400	5126800	Abomasum	EnhAWk	Enhancers	ERV2-1B-LTR_BT	LTR-ERVK	intronic	gene-STXBP4
19	9608400	9608600	Lung	EnhAWk	Enhancers	ERV2-1-LTR_BT	LTR-ERVK	intronic	gene-TEX14
19	9609000	9609400	Lung	EnhAWk	Enhancers	ERV2-1-LTR_BT	LTR-ERVK	intronic	gene-TEX14
19	14240400	14240600	Liver	EnhAWk	Enhancers	ERV2-2B_BT-LTR	LTR-ERVK	intergenic	gene-LOC515676(dist=5900),gene-LOC525415(dist=3058)
19	33925600	33925800	Abomasum	EnhAWk	Enhancers	ERV2-1B-LTR_BT	LTR-ERVK	intronic	gene-ALDH3A2
19	33925600	33925800	Duodenum	EnhAWk	Enhancers	ERV2-1B-LTR_BT	LTR-ERVK	intronic	gene-ALDH3A2
19	33925600	33925800	Ileum	EnhAWk	Enhancers	ERV2-1B-LTR_BT	LTR-ERVK	intronic	gene-ALDH3A2
19	33926800	33927000	Liver	EnhAWk	Enhancers	ERV2-1B-LTR_BT	LTR-ERVK	intronic	gene-ALDH3A2
19	33959200	33959400	Ileum	EnhAWk	Enhancers	ERV2-1-LTR_BT	LTR-ERVK	intergenic	gene-ALDH3A2(dist=23310),gene-SLC47A1(dist=27029)
19	43206000	43206200	Jejunum	EnhAWk	Enhancers	BTLTR1	LTR-ERVK	intergenic	gene-LOC100335845(dist=22689),gene-ARL4D(dist=128070)
19	43753000	43754200	Lung	EnhAWk	Enhancers	LTR2C_BT	LTR-ERVK	intergenic	gene-CD300LG(dist=7485),gene-MPP2(dist=9659)
19	51936200	51936600	Jejunum	EnhAWk	Enhancers	BTLTR1B	LTR-ERVK	intronic	gene-RPTOR
19	55734800	55735000	Abomasum	EnhAWk	Enhancers	ERV2-1B-LTR_BT	LTR-ERVK	intergenic	gene-TRIM65(dist=2239),gene-TRIM47(dist=6288)
2	2213600	2214200	Jejunum	EnhAWk	Enhancers	ERV2-1-I_BT	LTR-ERVK	intergenic	gene-PLEKHB2(dist=243804),gene-HS6ST1(dist=1973187)
2	4647200	4649200	Rumen	EnhAWk	Enhancers	BTLTR1F	LTR-ERVK	intergenic	gene-POLR2D(dist=12034),gene-WDR33(dist=27797)
2	6421000	6421400	Colon	EnhAWk	Enhancers	ERV2-2B_BT-I	LTR-ERVK	intergenic	gene-MSTN(dist=135510),gene-PMS1(dist=38694)
2	50252200	50252400	Abomasum	EnhAWk	Enhancers	ERV2-1C-LTR_BT	LTR-ERVK	intergenic	gene-LOC786829(dist=620322),gene-LOC101904069(dist=1917231)
2	59435400	59435600	Colon	EnhAWk	Enhancers	ERV2-1B-LTR_BT	LTR-ERVK	intergenic	gene-HNMT(dist=255122),gene-THSD7B(dist=75147)
2	63184600	63184800	Cecum	EnhAWk	Enhancers	BTLTR1	LTR-ERVK	intergenic	gene-MGAT5(dist=3175),gene-NCKAP5(dist=585878)
2	106000000	106000000	Cortex	EnhAWk	Enhancers	ERV2-1-LTR_BT	LTR-ERVK	intronic	gene-PNKD
2	106000000	106000000	Duodenum	EnhAWk	Enhancers	ERV2-1-LTR_BT	LTR-ERVK	intronic	gene-PNKD
2	106000000	106000000	Jejunum	EnhAWk	Enhancers	ERV2-1-LTR_BT	LTR-ERVK	intronic	gene-PNKD
2	106000000	106000000	Hypothalamus	EnhAWk	Enhancers	ERV2-1-LTR_BT	LTR-ERVK	intronic	gene-PNKD
2	106000000	106000000	Cortex	EnhAWk	Enhancers	ERV2-1-LTR_BT	LTR-ERVK	intronic	gene-PNKD
2	107000000	107000000	Cecum	EnhAWk	Enhancers	BTLTR1B	LTR-ERVK	intergenic	gene-TTLL4(dist=9381),gene-CYP27A1(dist=24407)
2	107000000	107000000	Liver	EnhAWk	Enhancers	BTLTR1	LTR-ERVK	intronic	gene-CYP27A1
2	107000000	107000000	Liver	EnhAWk	Enhancers	ERV2-1C-LTR_BT	LTR-ERVK	intronic	gene-CYP27A1
2	119000000	119000000	Liver	EnhAWk	Enhancers	LTR3_BT	LTR-ERVK	intronic	gene-ARMC9
2	121000000	121000000	Rumen	EnhAWk	Enhancers	BTLTR1F	LTR-ERVK	UTR5	gene-S100PBP
2	126000000	126000000	Lung	EnhAWk	Enhancers	ERV2-3-LTR_BT	LTR-ERVK	intronic	gene-WDTC1
2	130000000	130000000	Ileum	EnhAWk	Enhancers	BTLTR1F	LTR-ERVK	intronic	gene-ZBTB40
2	132000000	132000000	Liver	EnhAWk	Enhancers	LTR7_BT	LTR-ERVK	intronic	gene-KIF17
2	133000000	133000000	Jejunum	EnhAWk	Enhancers	BTLTR1D2	LTR-ERVK	intergenic	gene-PLA2G5(dist=8420),gene-PLA2G2A(dist=11964)
2	133000000	133000000	Abomasum	EnhAWk	Enhancers	ERV2-1B-LTR_BT	LTR-ERVK	intergenic	gene-OTUD3(dist=30673),gene-RNF186(dist=24510)
2	134000000	134000000	Liver	EnhAWk	Enhancers	BTLTR1	LTR-ERVK	intronic	gene-ALDH4A1
20	31723800	31725000	Abomasum	EnhAWk	Enhancers	ERV2-1C-LTR_BT	LTR-ERVK	intergenic	gene-ZNF131(dist=143125),gene-SELENOP(dist=36769)
20	31797600	31797800	Cecum	EnhAWk	Enhancers	ERV2-1B-LTR_BT	LTR-ERVK	intronic	gene-CCDC152
20	31798600	31799200	Cecum	EnhAWk	Enhancers	ERV2-1B-LTR_BT	LTR-ERVK	intronic	gene-CCDC152
21	177000	177400	Jejunum	EnhAWk	Enhancers	ERV2-3-LTR_BT	LTR-ERVK	intergenic	NONE(dist=NONE),gene-LOC101908149(dist=3460)
21	634600	634800	Ileum	EnhAWk	Enhancers	ERV2-2B_BT-I	LTR-ERVK	intergenic	gene-LOC112443246(dist=37125),gene-LOC112443207(dist=71009)
21	777800	778000	Cecum	EnhAWk	Enhancers	ERV2-1-I_BT	LTR-ERVK	intergenic	gene-LOC112443209(dist=60479),gene-MKRN3(dist=381729)
21	777800	778200	Jejunum	EnhAWk	Enhancers	ERV2-1-I_BT	LTR-ERVK	intergenic	gene-LOC112443209(dist=60479),gene-MKRN3(dist=381529)
21	19631400	19631600	Cecum	EnhAWk	Enhancers	ERV2-3-I_BT	LTR-ERVK	exonic	gene-LOC101903572
21	19631400	19632400	Adipose	EnhAWk	Enhancers	ERV2-3-I_BT	LTR-ERVK	exonic	gene-LOC101903572
21	29194400	29195200	Liver	EnhAWk	Enhancers	BTLTR1E1	LTR-ERVK	intergenic	gene-SNRPA1(dist=28015),gene-LOC789895(dist=35734)
21	29205600	29205800	Abomasum	EnhAWk	Enhancers	BTLTR1E1	LTR-ERVK	intergenic	gene-SNRPA1(dist=39215),gene-LOC789895(dist=25134)
21	56745600	56745800	Abomasum	EnhAWk	Enhancers	BTLTR1	LTR-ERVK	intergenic	gene-TRIP11(dist=1043),gene-ATXN3(dist=11142)
21	56745600	56745800	Cecum	EnhAWk	Enhancers	BTLTR1	LTR-ERVK	intergenic	gene-TRIP11(dist=1043),gene-ATXN3(dist=11142)
21	56745600	56745800	Ileum	EnhAWk	Enhancers	BTLTR1	LTR-ERVK	intergenic	gene-TRIP11(dist=1043),gene-ATXN3(dist=11142)
21	56745600	56745800	Liver	EnhAWk	Enhancers	BTLTR1	LTR-ERVK	intergenic	gene-TRIP11(dist=1043),gene-ATXN3(dist=11142)
21	56745600	56745800	Lung	EnhAWk	Enhancers	BTLTR1	LTR-ERVK	intergenic	gene-TRIP11(dist=1043),gene-ATXN3(dist=11142)
21	58350400	58350600	Abomasum	EnhAWk	Enhancers	ERV2-1B-LTR_BT	LTR-ERVK	intergenic	gene-UNC79(dist=18137),gene-PRIMA1(dist=2852)
21	59492400	59493800	Liver	EnhAWk	Enhancers	BTLTR1F	LTR-ERVK	intergenic	gene-SERPINA5-2(dist=27470),gene-GSC(dist=134199)
21	59492800	59493800	Abomasum	EnhAWk	Enhancers	BTLTR1F	LTR-ERVK	intergenic	gene-SERPINA5-2(dist=27870),gene-GSC(dist=134199)
21	61215200	61215400	Abomasum	EnhAWk	Enhancers	BTLTR1B1	LTR-ERVK	intronic	gene-ATG2B
21	68263600	68263800	Ileum	EnhAWk	Enhancers	ERV2-1B-LTR_BT	LTR-ERVK	intronic	gene-KLC1
21	68263600	68263800	Jejunum	EnhAWk	Enhancers	ERV2-1B-LTR_BT	LTR-ERVK	intronic	gene-KLC1
21	68263600	68263800	Liver	EnhAWk	Enhancers	ERV2-1B-LTR_BT	LTR-ERVK	intronic	gene-KLC1
21	68263600	68263800	Lung	EnhAWk	Enhancers	ERV2-1B-LTR_BT	LTR-ERVK	intronic	gene-KLC1
21	68264600	68264800	Abomasum	EnhAWk	Enhancers	ERV2-1B-LTR_BT	LTR-ERVK	intronic	gene-KLC1
21	68264600	68265200	Colon	EnhAWk	Enhancers	ERV2-1B-LTR_BT	LTR-ERVK	intronic	gene-KLC1
22	1501200	1501400	Abomasum	EnhAWk	Enhancers	BTLTR1F	LTR-ERVK	intronic	gene-NEK10
22	10574400	10574800	Abomasum	EnhAWk	Enhancers	BTLTR1F	LTR-ERVK	intergenic	gene-EPM2AIP1(dist=15393),gene-TRANK1(dist=15747)
22	11227800	11228000	Abomasum	EnhAWk	Enhancers	BTLTR1	LTR-ERVK	intronic	gene-ITGA9
22	14787000	14787200	Cecum	EnhAWk	Enhancers	BTLTR1B	LTR-ERVK	intronic	gene-NKTR
22	51627200	51627800	Spleen	EnhAWk	Enhancers	LTR7_BT	LTR-ERVK	intergenic	gene-CATHL3(dist=6129),gene-CATHL2(dist=13266)
22	52930000	52932000	Duodenum	EnhAWk	Enhancers	BTLTR1C	LTR-ERVK	exonic	gene-RTP3
22	57160200	57160600	Abomasum	EnhAWk	Enhancers	ERV2-2B_BT-I	LTR-ERVK	intronic	gene-RBSN
22	58372000	58372200	Lung	EnhAWk	Enhancers	BTLTR1B	LTR-ERVK	intronic	gene-FBLN2
22	58373200	58373400	Lung	EnhAWk	Enhancers	BTLTR1B	LTR-ERVK	intronic	gene-FBLN2
22	58373200	58373400	Spleen	EnhAWk	Enhancers	BTLTR1B	LTR-ERVK	intronic	gene-FBLN2
23	4185400	4185800	Abomasum	EnhAWk	Enhancers	BTLTR1	LTR-ERVK	intronic	gene-COL21A1
23	4185400	4185800	Cecum	EnhAWk	Enhancers	BTLTR1	LTR-ERVK	intronic	gene-COL21A1
23	27105200	27106600	Abomasum	EnhAWk	Enhancers	ERV2-1C-LTR_BT	LTR-ERVK	intergenic	gene-LOC112443844(dist=10284),gene-LOC615223(dist=2831)
23	28060200	28061400	Abomasum	EnhAWk	Enhancers	BTLTR1F	LTR-ERVK	downstream	gene-LOC616942
23	28584000	28585000	Rumen	EnhAWk	Enhancers	BTLTR1C	LTR-ERVK	intergenic	gene-BOLA-NC1(dist=31615),gene-JSP.1(dist=27859)
23	29989800	29990000	Adipose	EnhAWk	Enhancers	BTLTR1J4	LTR-ERVK	intergenic	gene-LOC782554(dist=58295),gene-ZNF311(dist=4449)
23	31338800	31339000	Hypothalamus	EnhAWk	Enhancers	BTLTR1	LTR-ERVK	intergenic	gene-TRNAV-CAC-20(dist=3733),gene-TRNAI-AAU-15(dist=1082)
23	44031200	44031400	Cecum	EnhAWk	Enhancers	ERV2-1-I_BT	LTR-ERVK	intergenic	gene-PHACTR1(dist=234375),gene-EDN1(dist=125039)
23	50553400	50554200	Liver	EnhAWk	Enhancers	LTR2B_BT	LTR-ERVK	downstream	gene-RIPK1
24	43445200	43445600	Liver	EnhAWk	Enhancers	BTLTR1	LTR-ERVK	intronic	gene-LDLRAD4
24	43445200	43446600	Lung	EnhAWk	Enhancers	BTLTR1	LTR-ERVK	intronic	gene-LDLRAD4
24	43445400	43445600	Cecum	EnhAWk	Enhancers	BTLTR1	LTR-ERVK	intronic	gene-LDLRAD4
24	43445400	43445600	Jejunum	EnhAWk	Enhancers	BTLTR1	LTR-ERVK	intronic	gene-LDLRAD4
24	45816400	45816800	Spleen	EnhAWk	Enhancers	BTLTR1J4	LTR-ERVK	intronic	gene-PSTPIP2
24	46481800	46482000	Rumen	EnhAWk	Enhancers	BTLTR1C	LTR-ERVK	intronic	gene-ST8SIA5
24	55951800	55952800	Cecum	EnhAWk	Enhancers	BTLTR1D2	LTR-ERVK	intronic	gene-TXNL1
24	55952400	55952800	Jejunum	EnhAWk	Enhancers	BTLTR1D2	LTR-ERVK	intronic	gene-TXNL1
24	55952600	55952800	Ileum	EnhAWk	Enhancers	BTLTR1D2	LTR-ERVK	intronic	gene-TXNL1
24	58144000	58144200	Cerebellum	EnhAWk	Enhancers	BTLTR1B	LTR-ERVK	intergenic	gene-LOC510913(dist=21427),gene-SEC11C(dist=8053)
24	62094000	62094200	Rumen	EnhAWk	Enhancers	BTLTR1B1	LTR-ERVK	downstream	gene-SERPINB2
25	18151600	18152000	Rumen	EnhAWk	Enhancers	ERV2-2B_BT-I	LTR-ERVK	intronic	gene-ACSM2B
25	21275200	21275400	Jejunum	EnhAWk	Enhancers	ERV2-1B-LTR_BT	LTR-ERVK	intronic	gene-PALB2
25	26117600	26117800	Adipose	EnhAWk	Enhancers	BTLTR1D	LTR-ERVK	intronic	gene-SGF29
25	26117600	26117800	Cecum	EnhAWk	Enhancers	BTLTR1D	LTR-ERVK	intronic	gene-SGF29
25	28195000	28195400	Liver	EnhAWk	Enhancers	LTR2_BT	LTR-ERVK	intergenic	gene-TPST1(dist=6864),gene-KCTD7(dist=9257)
26	538600	539400	Jejunum	EnhAWk	Enhancers	BTLTR1D2	LTR-ERVK	intergenic	gene-LOC101903496(dist=113785),gene-UBE2D1(dist=126169)
26	9318600	9319000	Jejunum	EnhAWk	Enhancers	BTLTR1D2	LTR-ERVK	intronic	gene-PAPSS2
26	9327400	9327600	Cecum	EnhAWk	Enhancers	BTLTR1D	LTR-ERVK	intronic	gene-PAPSS2
26	16138400	16139000	Rumen	EnhAWk	Enhancers	BTLTR1B1	LTR-ERVK	intergenic	gene-CYP2C18(dist=21016),gene-CYP2C87(dist=5353)
26	25682600	25682800	Colon	EnhAWk	Enhancers	BTLTR1	LTR-ERVK	UTR3	gene-LOC101905041
28	1650600	1650800	Abomasum	EnhAWk	Enhancers	ERV2-2B_BT-LTR	LTR-ERVK	intergenic	gene-URB2(dist=45645),gene-GALNT2(dist=447338)
29	40756000	40756200	Hypothalamus	EnhAWk	Enhancers	ERV2-1-LTR_BT	LTR-ERVK	upstream	gene-ASRGL1
29	41170800	41171000	Rumen	EnhAWk	Enhancers	BTLTR1B	LTR-ERVK	intronic	gene-SLC3A2
29	41171200	41172000	Rumen	EnhAWk	Enhancers	ERV2-1-I_BT	LTR-ERVK	intronic	gene-SLC3A2
29	41171800	41172000	Cecum	EnhAWk	Enhancers	ERV2-1-I_BT	LTR-ERVK	intronic	gene-SLC3A2
29	41171800	41172000	Duodenum	EnhAWk	Enhancers	ERV2-1-I_BT	LTR-ERVK	intronic	gene-SLC3A2
29	41171800	41172000	Jejunum	EnhAWk	Enhancers	ERV2-1-I_BT	LTR-ERVK	intronic	gene-SLC3A2
29	41172600	41172800	Cecum	EnhAWk	Enhancers	ERV2-1-I_BT	LTR-ERVK	intronic	gene-SLC3A2
29	41174200	41175000	Cecum	EnhAWk	Enhancers	ERV2-1-I_BT	LTR-ERVK	intronic	gene-SLC3A2
29	41174600	41175200	Colon	EnhAWk	Enhancers	ERV2-1-I_BT	LTR-ERVK	intronic	gene-SLC3A2
29	41175600	41177400	Colon	EnhAWk	Enhancers	ERV2-1-I_BT	LTR-ERVK	intronic	gene-SLC3A2
29	41176600	41177400	Jejunum	EnhAWk	Enhancers	ERV2-1-I_BT	LTR-ERVK	intronic	gene-SLC3A2
29	41176800	41177200	Cecum	EnhAWk	Enhancers	ERV2-1-I_BT	LTR-ERVK	intronic	gene-SLC3A2
29	44422400	44422800	Jejunum	EnhAWk	Enhancers	BTLTR1	LTR-ERVK	intergenic	gene-SLC29A2(dist=3454),gene-NPAS4(dist=41486)
29	44422400	44423400	Ileum	EnhAWk	Enhancers	BTLTR1	LTR-ERVK	intergenic	gene-SLC29A2(dist=3454),gene-NPAS4(dist=40886)
29	45309000	45309200	Abomasum	EnhAWk	Enhancers	BTLTR1B	LTR-ERVK	intergenic	gene-TBC1D10C(dist=6311),gene-CARNS1(dist=1259)
29	46299800	46300000	Cecum	EnhAWk	Enhancers	BTLTR1B	LTR-ERVK	intergenic	gene-IGHMBP2(dist=6757),gene-LOC507247(dist=8692)
29	50928400	50929800	Hypothalamus	EnhAWk	Enhancers	ERV2-1-I_BT	LTR-ERVK	upstream	gene-IFITM3
29	50928600	50929800	Rumen	EnhAWk	Enhancers	ERV2-1-I_BT	LTR-ERVK	upstream	gene-IFITM3
29	50928800	50929800	Adipose	EnhAWk	Enhancers	ERV2-1-I_BT	LTR-ERVK	upstream	gene-IFITM3
29	50928800	50930000	Spleen	EnhAWk	Enhancers	ERV2-1-I_BT	LTR-ERVK	upstream	gene-IFITM3
29	50929000	50929200	Cecum	EnhAWk	Enhancers	ERV2-1-I_BT	LTR-ERVK	intergenic	gene-B4GALNT4(dist=19810),gene-IFITM3(dist=1282)
29	50929000	50929600	Cortex	EnhAWk	Enhancers	ERV2-1-I_BT	LTR-ERVK	upstream	gene-IFITM3
3	6962600	6963000	Ileum	EnhAWk	Enhancers	BTLTR1D2	LTR-ERVK	intergenic	gene-UAP1(dist=23964),gene-UHMK1(dist=17638)
3	6962800	6963000	Adipose	EnhAWk	Enhancers	BTLTR1D2	LTR-ERVK	intergenic	gene-UAP1(dist=24164),gene-UHMK1(dist=17638)
3	6962800	6963000	Jejunum	EnhAWk	Enhancers	BTLTR1D2	LTR-ERVK	intergenic	gene-UAP1(dist=24164),gene-UHMK1(dist=17638)
3	8914800	8916200	Spleen	EnhAWk	Enhancers	BTLTR1C	LTR-ERVK	intronic	gene-CD48
3	8916800	8917000	Ileum	EnhAWk	Enhancers	BTLTR1	LTR-ERVK	intronic	gene-CD48
3	12612400	12612800	Jejunum	EnhAWk	Enhancers	BTLTR1D2	LTR-ERVK	intergenic	gene-FCRL1(dist=1759),gene-FCRL3(dist=22792)
3	12785000	12785200	Ileum	EnhAWk	Enhancers	ERV2-1C-LTR_BT	LTR-ERVK	intergenic	gene-FCRL4(dist=6533),gene-FCRL5(dist=18984)
3	12786000	12786200	Cecum	EnhAWk	Enhancers	ERV2-1C-LTR_BT	LTR-ERVK	intergenic	gene-FCRL4(dist=7533),gene-FCRL5(dist=17984)
3	16816200	16816400	Abomasum	EnhAWk	Enhancers	BTLTR1	LTR-ERVK	intergenic	gene-S100A2(dist=4382),gene-S100A3(dist=3575)
3	16816200	16816400	Adipose	EnhAWk	Enhancers	BTLTR1	LTR-ERVK	intergenic	gene-S100A2(dist=4382),gene-S100A3(dist=3575)
3	16816200	16816400	Cecum	EnhAWk	Enhancers	BTLTR1	LTR-ERVK	intergenic	gene-S100A2(dist=4382),gene-S100A3(dist=3575)
3	20804200	20804600	Ileum	EnhAWk	Enhancers	BTLTR1D2	LTR-ERVK	intronic	gene-FCGR1A,gene-LOC788142
3	33025000	33025200	Rumen	EnhAWk	Enhancers	BTLTR1E	LTR-ERVK	intergenic	gene-PROK1(dist=32906),gene-LAMTOR5(dist=1599)
3	41821800	41822400	Rumen	EnhAWk	Enhancers	BTLTR1C	LTR-ERVK	intergenic	gene-OLFM3(dist=326509),gene-S1PR1(dist=210554)
3	46044200	46045200	Adipose	EnhAWk	Enhancers	BTLTR1	LTR-ERVK	intronic	gene-DPYD
3	53871000	53871400	Cecum	EnhAWk	Enhancers	LTR3_BT	LTR-ERVK	exonic	gene-LOC513659
3	54926200	54926400	Duodenum	EnhAWk	Enhancers	LTR3_BT	LTR-ERVK	intergenic	gene-LOC511531(dist=5137),gene-KYAT3(dist=2076)
3	66025000	66025600	Abomasum	EnhAWk	Enhancers	ERV2-1B-LTR_BT	LTR-ERVK	intronic	gene-IFI44
3	73724800	73725200	Adipose	EnhAWk	Enhancers	BTLTR1F	LTR-ERVK	intronic	gene-NEGR1
3	87542800	87543200	Jejunum	EnhAWk	Enhancers	BTLTR1C	LTR-ERVK	intronic	gene-OMA1
3	93020400	93020600	Adipose	EnhAWk	Enhancers	BTLTR1	LTR-ERVK	intronic	gene-C3H1orf123
3	93443000	93443400	Cecum	EnhAWk	Enhancers	ERV2-1B-LTR_BT	LTR-ERVK	intronic	gene-ECHDC2
3	99511600	99511800	Abomasum	EnhAWk	Enhancers	BTLTR1	LTR-ERVK	intergenic	gene-ATPAF1(dist=17774),gene-MOB3C(dist=2965)
3	102000000	102000000	Ileum	EnhAWk	Enhancers	BTLTR1	LTR-ERVK	intronic	gene-ST3GAL3
3	103000000	103000000	Abomasum	EnhAWk	Enhancers	ERV2-2B_BT-LTR	LTR-ERVK	intergenic	gene-LOC782545(dist=1923),gene-LOC614376(dist=165864)
3	105000000	105000000	Cecum	EnhAWk	Enhancers	ERV2-1B-LTR_BT	LTR-ERVK	intronic	gene-SCMH1
3	113000000	113000000	Liver	EnhAWk	Enhancers	BTLTR1F	LTR-ERVK	intronic	gene-USP40
3	114000000	114000000	Abomasum	EnhAWk	Enhancers	BTLTR1	LTR-ERVK	intergenic	gene-LOC112445915(dist=257727),gene-SH3BP4(dist=161120)
3	117000000	117000000	Cecum	EnhAWk	Enhancers	BTLTR1	LTR-ERVK	intronic	gene-LRRFIP1
3	117000000	117000000	Lung	EnhAWk	Enhancers	BTLTR1	LTR-ERVK	intronic	gene-LRRFIP1
3	117000000	117000000	Duodenum	EnhAWk	Enhancers	BTLTR1	LTR-ERVK	intronic	gene-LRRFIP1
3	121000000	121000000	Ileum	EnhAWk	Enhancers	ERV2-1B-LTR_BT	LTR-ERVK	intergenic	gene-D2HGDH(dist=7817),gene-GAL3ST2(dist=1677)
3	121000000	121000000	Colon	EnhAWk	Enhancers	ERV2-1B-LTR_BT	LTR-ERVK	intergenic	gene-D2HGDH(dist=8017),gene-GAL3ST2(dist=1077)
3	121000000	121000000	Cecum	EnhAWk	Enhancers	ERV2-1B-LTR_BT	LTR-ERVK	upstream	gene-GAL3ST2
3	121000000	121000000	Ileum	EnhAWk	Enhancers	ERV2-1B-LTR_BT	LTR-ERVK	intergenic	gene-NEU4(dist=3498),gene-PDCD1(dist=5812)
3	121000000	121000000	Lung	EnhAWk	Enhancers	ERV2-1B-LTR_BT	LTR-ERVK	intergenic	gene-NEU4(dist=3498),gene-PDCD1(dist=5812)
4	4522200	4523000	Abomasum	EnhAWk	Enhancers	LTR7_BT	LTR-ERVK	intergenic	NONE(dist=NONE),gene-COBL(dist=59569)
4	28673600	28674000	Abomasum	EnhAWk	Enhancers	ERV2-1B-LTR_BT	LTR-ERVK	intergenic	gene-TMEM196(dist=118862),gene-MACC1(dist=114434)
4	44430200	44430400	Cecum	EnhAWk	Enhancers	BTLTR1B1	LTR-ERVK	intronic	gene-ARMC10,gene-NAPEPLD
4	65751400	65752000	Colon	EnhAWk	Enhancers	BTLTR1D2	LTR-ERVK	intronic	gene-GARS
4	65751800	65752000	Spleen	EnhAWk	Enhancers	BTLTR1D2	LTR-ERVK	intronic	gene-GARS
4	88295200	88295400	Cecum	EnhAWk	Enhancers	BTLTR1	LTR-ERVK	intergenic	gene-LOC527125(dist=12284),gene-LOC509761(dist=47897)
4	102000000	102000000	Adipose	EnhAWk	Enhancers	BTLTR1D2	LTR-ERVK	intergenic	gene-AKR1D1(dist=124493),gene-TRNAK-UUU-9(dist=10420)
4	105000000	105000000	Adipose	EnhAWk	Enhancers	BTLTR1D2	LTR-ERVK	intergenic	gene-SSBP1(dist=13434),gene-TAS2R3(dist=7563)
4	105000000	105000000	Adipose	EnhAWk	Enhancers	BTLTR1F	LTR-ERVK	intergenic	gene-CLEC5A(dist=17269),gene-TAS2R38(dist=1782)
4	119000000	119000000	Abomasum	EnhAWk	Enhancers	BTLTR1	LTR-ERVK	intergenic	gene-DNAJB6(dist=14375),gene-PTPRN2(dist=36441)
5	498400	499000	Adipose	EnhAWk	Enhancers	BTLTR1D2	LTR-ERVK	intergenic	gene-LOC782348(dist=81601),gene-MIR2284Y-6(dist=115532)
5	498400	499200	Hypothalamus	EnhAWk	Enhancers	BTLTR1D2	LTR-ERVK	intergenic	gene-LOC782348(dist=81601),gene-MIR2284Y-6(dist=115332)
5	41031800	41032000	Abomasum	EnhAWk	Enhancers	BTLTR1B	LTR-ERVK	intronic	gene-SLC2A13
5	74555200	74555400	Lung	EnhAWk	Enhancers	BTLTR1D2	LTR-ERVK	intergenic	gene-LOC524576(dist=30413),gene-LOC510193(dist=5974)
5	74642000	74643000	Ileum	EnhAWk	Enhancers	BTLTR1	LTR-ERVK	intergenic	gene-LOC112446726(dist=7979),gene-LOC619179(dist=13067)
5	89719600	89719800	Colon	EnhAWk	Enhancers	BTLTR1B	LTR-ERVK	intergenic	gene-PDE3A(dist=223005),gene-LOC112446620(dist=694473)
5	94917000	94917400	Spleen	EnhAWk	Enhancers	BTLTR1	LTR-ERVK	intergenic	gene-RERG(dist=117520),gene-PDE6H(dist=6615)
5	95134800	95135600	Cecum	EnhAWk	Enhancers	LTR7_BT	LTR-ERVK	intergenic	gene-WBP11(dist=15932),gene-H2AFJ(dist=1049)
5	95135000	95135400	Abomasum	EnhAWk	Enhancers	LTR7_BT	LTR-ERVK	intergenic	gene-WBP11(dist=16132),gene-H2AFJ(dist=1249)
5	95135200	95135400	Colon	EnhAWk	Enhancers	LTR7_BT	LTR-ERVK	intergenic	gene-WBP11(dist=16332),gene-H2AFJ(dist=1249)
5	95135200	95135400	Lung	EnhAWk	Enhancers	LTR7_BT	LTR-ERVK	intergenic	gene-WBP11(dist=16332),gene-H2AFJ(dist=1249)
5	96889600	96890400	Abomasum	EnhAWk	Enhancers	BTLTR1E2	LTR-ERVK	intronic	gene-HEBP1
5	97604200	97604800	Cecum	EnhAWk	Enhancers	BTLTR1B	LTR-ERVK	intronic	gene-LRP6
5	100000000	100000000	Spleen	EnhAWk	Enhancers	ERV2-1C-LTR_BT	LTR-ERVK	intergenic	gene-LOC509972(dist=10979),gene-LOC784451(dist=3613)
5	102000000	102000000	Lung	EnhAWk	Enhancers	BTLTR1B	LTR-ERVK	intronic	gene-WC1-12
5	104000000	104000000	Rumen	EnhAWk	Enhancers	ERV2-1-LTR_BT	LTR-ERVK	intronic	gene-VWF
5	112000000	112000000	Abomasum	EnhAWk	Enhancers	ERV2-1-LTR_BT	LTR-ERVK	intronic	gene-ADSL
5	112000000	112000000	Ileum	EnhAWk	Enhancers	ERV2-1-LTR_BT	LTR-ERVK	intronic	gene-ADSL
5	112000000	112000000	Lung	EnhAWk	Enhancers	ERV2-1-LTR_BT	LTR-ERVK	intronic	gene-ADSL
5	112000000	112000000	Spleen	EnhAWk	Enhancers	ERV2-1-LTR_BT	LTR-ERVK	intronic	gene-ADSL
5	112000000	112000000	Cerebellum	EnhAWk	Enhancers	BTLTR1	LTR-ERVK	intronic	gene-SGSM3
5	112000000	112000000	Abomasum	EnhAWk	Enhancers	BTLTR1	LTR-ERVK	intronic	gene-SGSM3
5	112000000	112000000	Ileum	EnhAWk	Enhancers	BTLTR1	LTR-ERVK	intronic	gene-SGSM3
5	112000000	112000000	Ileum	EnhAWk	Enhancers	BTLTR1	LTR-ERVK	intronic	gene-SGSM3
5	112000000	112000000	Liver	EnhAWk	Enhancers	BTLTR1	LTR-ERVK	intronic	gene-MKL1
5	112000000	112000000	Abomasum	EnhAWk	Enhancers	BTLTR1	LTR-ERVK	intronic	gene-MKL1
5	113000000	113000000	Cecum	EnhAWk	Enhancers	BTLTR1B	LTR-ERVK	intronic	gene-ACO2
5	113000000	113000000	Liver	EnhAWk	Enhancers	BTLTR1B	LTR-ERVK	intronic	gene-ACO2
5	117000000	117000000	Ileum	EnhAWk	Enhancers	BTLTR1	LTR-ERVK	upstream	gene-GTSE1
5	117000000	117000000	Cecum	EnhAWk	Enhancers	ERV2-3-LTR_BT	LTR-ERVK	UTR5	gene-TRMU
5	117000000	117000000	Colon	EnhAWk	Enhancers	ERV2-3-LTR_BT	LTR-ERVK	UTR5	gene-TRMU
5	117000000	117000000	Spleen	EnhAWk	Enhancers	ERV2-3-LTR_BT	LTR-ERVK	UTR5	gene-TRMU
5	117000000	117000000	Abomasum	EnhAWk	Enhancers	ERV2-3-LTR_BT	LTR-ERVK	intronic	gene-TRMU
5	117000000	117000000	Ileum	EnhAWk	Enhancers	ERV2-3-LTR_BT	LTR-ERVK	intronic	gene-TRMU
5	117000000	117000000	Jejunum	EnhAWk	Enhancers	ERV2-3-LTR_BT	LTR-ERVK	intronic	gene-TRMU
5	117000000	117000000	Lung	EnhAWk	Enhancers	ERV2-3-LTR_BT	LTR-ERVK	intronic	gene-TRMU
5	117000000	117000000	Adipose	EnhAWk	Enhancers	ERV2-3-LTR_BT	LTR-ERVK	UTR5	gene-TRMU
5	117000000	117000000	Duodenum	EnhAWk	Enhancers	ERV2-3-LTR_BT	LTR-ERVK	UTR5	gene-TRMU
5	117000000	117000000	Adipose	EnhAWk	Enhancers	ERV2-2B_BT-LTR	LTR-ERVK	intronic	gene-TRMU
5	117000000	117000000	Liver	EnhAWk	Enhancers	ERV2-2B_BT-LTR	LTR-ERVK	intronic	gene-TRMU
5	117000000	117000000	Duodenum	EnhAWk	Enhancers	ERV2-2B_BT-LTR	LTR-ERVK	intronic	gene-TRMU
5	117000000	117000000	Adipose	EnhAWk	Enhancers	BTLTR1	LTR-ERVK	intergenic	gene-CERK(dist=14740),gene-TBC1D22A(dist=15807)
6	5464000	5464200	Cecum	EnhAWk	Enhancers	BTLTR1	LTR-ERVK	intergenic	gene-PRDM5(dist=682012),gene-TRNAG-CCC-41(dist=251555)
6	13273800	13274600	Cecum	EnhAWk	Enhancers	BTLTR1E3	LTR-ERVK	intergenic	gene-AP1AR(dist=1048),gene-FAM241A(dist=57779)
6	25281600	25281800	Cecum	EnhAWk	Enhancers	BTLTR1	LTR-ERVK	intronic	gene-ADH1C
6	59183400	59183600	Spleen	EnhAWk	Enhancers	LTR2C_BT	LTR-ERVK	intergenic	gene-N4BP2(dist=20686),gene-RHOH(dist=18553)
6	59440600	59440800	Cecum	EnhAWk	Enhancers	BTLTR1	LTR-ERVK	intronic	gene-RBM47
6	79652200	79652400	Liver	EnhAWk	Enhancers	LTR2_BT	LTR-ERVK	intergenic	gene-LOC112447087(dist=469239),gene-TECRL(dist=135320)
6	85181400	85181800	Jejunum	EnhAWk	Enhancers	BTLTR1D2	LTR-ERVK	intergenic	gene-UGT2A1(dist=39544),gene-SULT1B1(dist=8207)
6	86147800	86148000	Abomasum	EnhAWk	Enhancers	BTLTR1D2	LTR-ERVK	intronic	gene-RUFY3
6	88883400	88884600	Abomasum	EnhAWk	Enhancers	ERV2-1C-LTR_BT	LTR-ERVK	intergenic	gene-CXCL8(dist=68829),gene-LOC534181(dist=2543)
6	92237200	92237400	Abomasum	EnhAWk	Enhancers	ERV2-1-LTR_BT	LTR-ERVK	intergenic	gene-CCNG2(dist=234179),gene-CXCL13(dist=47368)
6	97901000	97901200	Abomasum	EnhAWk	Enhancers	ERV2-1C-LTR_BT	LTR-ERVK	intronic	gene-PLAC8
6	97901000	97902200	Cecum	EnhAWk	Enhancers	ERV2-1C-LTR_BT	LTR-ERVK	intronic	gene-PLAC8
6	102000000	102000000	Abomasum	EnhAWk	Enhancers	BTLTR1F	LTR-ERVK	intergenic	gene-LOC781224(dist=21869),gene-HSD17B13(dist=17494)
6	105000000	105000000	Abomasum	EnhAWk	Enhancers	BTLTR1E	LTR-ERVK	intergenic	gene-SLC2A9(dist=31932),gene-WDR1(dist=32791)
6	105000000	105000000	Ileum	EnhAWk	Enhancers	BTLTR1E	LTR-ERVK	intergenic	gene-SLC2A9(dist=31932),gene-WDR1(dist=32791)
6	105000000	105000000	Duodenum	EnhAWk	Enhancers	BTLTR1E	LTR-ERVK	intergenic	gene-SLC2A9(dist=32132),gene-WDR1(dist=33391)
6	105000000	105000000	Jejunum	EnhAWk	Enhancers	BTLTR1E	LTR-ERVK	intergenic	gene-SLC2A9(dist=32132),gene-WDR1(dist=33391)
6	105000000	105000000	Liver	EnhAWk	Enhancers	BTLTR1E	LTR-ERVK	intergenic	gene-SLC2A9(dist=32132),gene-WDR1(dist=33391)
6	105000000	105000000	Lung	EnhAWk	Enhancers	BTLTR1E	LTR-ERVK	intergenic	gene-SLC2A9(dist=32332),gene-WDR1(dist=33391)
6	111000000	111000000	Cecum	EnhAWk	Enhancers	ERV2-1B-LTR_BT	LTR-ERVK	intergenic	gene-CD38(dist=9011),gene-FGFBP1(dist=70395)
6	117000000	117000000	Ileum	EnhAWk	Enhancers	BTLTR1	LTR-ERVK	intergenic	gene-SLBP(dist=18801),gene-FAM53A(dist=8592)
6	117000000	117000000	Jejunum	EnhAWk	Enhancers	BTLTR1	LTR-ERVK	UTR5	gene-FAM53A
7	556000	556200	Duodenum	EnhAWk	Enhancers	ERV2-1-I_BT	LTR-ERVK	intergenic	gene-FLT4(dist=18108),gene-CNOT6(dist=28614)
7	5048600	5049000	Jejunum	EnhAWk	Enhancers	BTLTR1E	LTR-ERVK	intergenic	gene-MPV17L2(dist=21586),gene-IFI30(dist=5903)
7	5048600	5049800	Abomasum	EnhAWk	Enhancers	BTLTR1E	LTR-ERVK	intergenic	gene-MPV17L2(dist=21586),gene-IFI30(dist=5103)
7	5293400	5294000	Lung	EnhAWk	Enhancers	LTR7_BT	LTR-ERVK	intergenic	gene-RPL18A(dist=10552),gene-JAK3(dist=12769)
7	15177200	15178400	Duodenum	EnhAWk	Enhancers	ERV2-1-I_BT	LTR-ERVK	intergenic	gene-ILF3(dist=9772),gene-QTRT1(dist=9813)
7	15177400	15177800	Rumen	EnhAWk	Enhancers	ERV2-1-I_BT	LTR-ERVK	intergenic	gene-ILF3(dist=9972),gene-QTRT1(dist=10413)
7	15178000	15179400	Ileum	EnhAWk	Enhancers	ERV2-1-I_BT	LTR-ERVK	intergenic	gene-ILF3(dist=10572),gene-QTRT1(dist=8813)
7	15178200	15178800	Cortex	EnhAWk	Enhancers	ERV2-1-I_BT	LTR-ERVK	intergenic	gene-ILF3(dist=10772),gene-QTRT1(dist=9413)
7	15178600	15179400	Jejunum	EnhAWk	Enhancers	ERV2-1-I_BT	LTR-ERVK	intergenic	gene-ILF3(dist=11172),gene-QTRT1(dist=8813)
7	15178800	15179600	Cecum	EnhAWk	Enhancers	ERV2-1-I_BT	LTR-ERVK	intergenic	gene-ILF3(dist=11372),gene-QTRT1(dist=8613)
7	20826600	20826800	Lung	EnhAWk	Enhancers	LTR7_BT	LTR-ERVK	exonic	gene-LOC789258
7	20826600	20827000	Cecum	EnhAWk	Enhancers	LTR7_BT	LTR-ERVK	exonic	gene-LOC789258
7	27185400	27185600	Spleen	EnhAWk	Enhancers	BTLTR1D2	LTR-ERVK	intergenic	gene-LMNB1(dist=9543),gene-TEX43(dist=73500)
7	34293000	34293200	Jejunum	EnhAWk	Enhancers	ERV2-2-I_BT	LTR-ERVK	intronic	gene-HSD17B4
7	34293000	34293600	Adipose	EnhAWk	Enhancers	ERV2-2-I_BT	LTR-ERVK	intronic	gene-HSD17B4
7	42843000	42843400	Jejunum	EnhAWk	Enhancers	ERV2-1-I_BT	LTR-ERVK	intergenic	gene-LOC614592(dist=19382),gene-LOC785149(dist=7852)
7	51487200	51488800	Rumen	EnhAWk	Enhancers	ERV2-1C-LTR_BT	LTR-ERVK	intronic	gene-PFDN1
7	51487400	51488800	Abomasum	EnhAWk	Enhancers	ERV2-1C-LTR_BT	LTR-ERVK	intronic	gene-PFDN1
7	51487400	51488800	Cecum	EnhAWk	Enhancers	ERV2-1C-LTR_BT	LTR-ERVK	intronic	gene-PFDN1
7	51488400	51488800	Jejunum	EnhAWk	Enhancers	ERV2-1C-LTR_BT	LTR-ERVK	intronic	gene-PFDN1
7	62717800	62718200	Cecum	EnhAWk	Enhancers	ERV2-1-I_BT	LTR-ERVK	intronic	gene-FAT2,gene-SLC36A1
7	62718000	62718600	Liver	EnhAWk	Enhancers	ERV2-1-I_BT	LTR-ERVK	intronic	gene-FAT2,gene-SLC36A1
7	62719200	62719400	Liver	EnhAWk	Enhancers	ERV2-1-I_BT	LTR-ERVK	intronic	gene-FAT2,gene-SLC36A1
7	62719200	62720800	Abomasum	EnhAWk	Enhancers	ERV2-1-I_BT	LTR-ERVK	intronic	gene-FAT2,gene-SLC36A1
7	62721000	62721200	Ileum	EnhAWk	Enhancers	ERV2-1-I_BT	LTR-ERVK	exonic	gene-BERV-K1
7	62721000	62722200	Jejunum	EnhAWk	Enhancers	ERV2-1-I_BT	LTR-ERVK	exonic	gene-BERV-K1
7	62721200	62721400	Adipose	EnhAWk	Enhancers	ERV2-1-I_BT	LTR-ERVK	exonic	gene-BERV-K1
7	68158000	68158200	Adipose	EnhAWk	Enhancers	BTLTR1	LTR-ERVK	intergenic	gene-SGCD(dist=138699),gene-HAVCR1(dist=44026)
7	68433200	68433600	Abomasum	EnhAWk	Enhancers	ERV2-1B-LTR_BT	LTR-ERVK	intronic	gene-LOC100294726
7	109000000	109000000	Liver	EnhAWk	Enhancers	BTLTR1	LTR-ERVK	intergenic	gene-PJA2(dist=64772),gene-MAN2A1(dist=217099)
8	26868600	26868800	Abomasum	EnhAWk	Enhancers	BTLTR1B	LTR-ERVK	intergenic	gene-SH3GL2(dist=42887),gene-CNTLN(dist=24860)
8	38499000	38499200	Abomasum	EnhAWk	Enhancers	BTLTR1	LTR-ERVK	intronic	gene-IL33
8	38499000	38499200	Cecum	EnhAWk	Enhancers	BTLTR1	LTR-ERVK	intronic	gene-IL33
8	38499000	38499200	Jejunum	EnhAWk	Enhancers	BTLTR1	LTR-ERVK	intronic	gene-IL33
8	38600800	38601400	Jejunum	EnhAWk	Enhancers	BTLTR1E2	LTR-ERVK	UTR5	gene-IL33
8	38601000	38601600	Liver	EnhAWk	Enhancers	BTLTR1E2	LTR-ERVK	UTR5	gene-IL33
8	38727200	38728200	Spleen	EnhAWk	Enhancers	LTR2B_BT	LTR-ERVK	intronic	gene-KIAA2026
8	38863400	38863600	Liver	EnhAWk	Enhancers	LTR3_BT	LTR-ERVK	intergenic	gene-MLANA(dist=47790),gene-ERMP1(dist=23288)
8	62483400	62483600	Cecum	EnhAWk	Enhancers	ERV2-3-LTR_BT	LTR-ERVK	intronic	gene-LOC507550
8	71377000	71377200	Rumen	EnhAWk	Enhancers	ERV2-1B-LTR_BT	LTR-ERVK	intergenic	gene-LOC539009(dist=9576),gene-ADAMDEC1(dist=119792)
8	91089800	91090000	Abomasum	EnhAWk	Enhancers	BTLTR1E1	LTR-ERVK	intronic	gene-BAAT
8	101000000	101000000	Spleen	EnhAWk	Enhancers	BTLTR1D2	LTR-ERVK	intergenic	gene-UGCG(dist=19368),gene-SUSD1(dist=119071)
8	104000000	104000000	Liver	EnhAWk	Enhancers	BTLTR1B	LTR-ERVK	intergenic	gene-WHRN(dist=55547),gene-ATP6V1G1(dist=15161)
8	111000000	111000000	Colon	EnhAWk	Enhancers	BTLTR1	LTR-ERVK	upstream	gene-EIPR1
8	111000000	111000000	Duodenum	EnhAWk	Enhancers	BTLTR1	LTR-ERVK	upstream	gene-EIPR1
8	111000000	111000000	Spleen	EnhAWk	Enhancers	BTLTR1	LTR-ERVK	upstream	gene-EIPR1
9	12894600	12895200	Jejunum	EnhAWk	Enhancers	ERV2-1-I_BT	LTR-ERVK	intergenic	gene-LOC104972961(dist=52247),gene-CGAS(dist=37176)
9	12894600	12895600	Duodenum	EnhAWk	Enhancers	ERV2-1-I_BT	LTR-ERVK	intergenic	gene-LOC104972961(dist=52247),gene-CGAS(dist=36776)
9	12894800	12896600	Cecum	EnhAWk	Enhancers	ERV2-1-I_BT	LTR-ERVK	intergenic	gene-LOC104972961(dist=52447),gene-CGAS(dist=35776)
9	12899400	12899800	Adipose	EnhAWk	Enhancers	ERV2-1-I_BT	LTR-ERVK	intergenic	gene-LOC104972961(dist=57047),gene-CGAS(dist=32576)
9	12899400	12902200	Liver	EnhAWk	Enhancers	ERV2-1-I_BT	LTR-ERVK	intergenic	gene-LOC104972961(dist=57047),gene-CGAS(dist=30176)
9	12900200	12900400	Abomasum	EnhAWk	Enhancers	ERV2-1-I_BT	LTR-ERVK	intergenic	gene-LOC104972961(dist=57847),gene-CGAS(dist=31976)
9	12900200	12900400	Colon	EnhAWk	Enhancers	ERV2-1-I_BT	LTR-ERVK	intergenic	gene-LOC104972961(dist=57847),gene-CGAS(dist=31976)
9	12901200	12902400	Cecum	EnhAWk	Enhancers	ERV2-1-I_BT	LTR-ERVK	intergenic	gene-LOC104972961(dist=58847),gene-CGAS(dist=29976)
9	12901400	12903000	Jejunum	EnhAWk	Enhancers	ERV2-1-I_BT	LTR-ERVK	intergenic	gene-LOC104972961(dist=59047),gene-CGAS(dist=29376)
9	23923800	23924000	Adipose	EnhAWk	Enhancers	ERV2-1C-LTR_BT	LTR-ERVK	intergenic	gene-KIAA0408(dist=61996),gene-ECHDC1(dist=23552)
9	43138200	43139200	Abomasum	EnhAWk	Enhancers	BTLTR1	LTR-ERVK	intergenic	gene-CD24(dist=140351),gene-QRSL1(dist=150714)
9	64109600	64109800	Rumen	EnhAWk	Enhancers	BTLTR1E1	LTR-ERVK	intergenic	gene-LOC100335322(dist=49360),gene-TBX18(dist=552141)
9	70821200	70823800	Abomasum	EnhAWk	Enhancers	BTLTR1F	LTR-ERVK	intronic	gene-TAAR1
9	74313000	74315400	Rumen	EnhAWk	Enhancers	BTLTR1F	LTR-ERVK	intergenic	gene-BCLAF1(dist=25404),gene-MAP7(dist=44065)
9	94604200	94605200	Abomasum	EnhAWk	Enhancers	BTLTR1D2	LTR-ERVK	intronic	gene-SYNJ2
9	94722600	94723400	Lung	EnhAWk	Enhancers	ERV2-1C-LTR_BT	LTR-ERVK	intronic	gene-GTF2H5
9	96031200	96031400	Ileum	EnhAWk	Enhancers	ERV2-1-LTR_BT	LTR-ERVK	intronic	gene-ACAT2
9	96031400	96031600	Liver	EnhAWk	Enhancers	ERV2-1-LTR_BT	LTR-ERVK	intronic	gene-ACAT2
9	96032200	96032400	Liver	EnhAWk	Enhancers	ERV2-1-LTR_BT	LTR-ERVK	intronic	gene-ACAT2
9	97290000	97290200	Colon	EnhAWk	Enhancers	BTLTR1B1	LTR-ERVK	intronic	gene-PRKN
9	100000000	100000000	Adipose	EnhAWk	Enhancers	BTLTR1C	LTR-ERVK	intergenic	gene-TRNAC-GCA-122(dist=508579),gene-C9H6orf118(dist=259549)
9	100000000	100000000	Colon	EnhAWk	Enhancers	BTLTR1C	LTR-ERVK	intergenic	gene-TRNAC-GCA-122(dist=508779),gene-C9H6orf118(dist=259349)
9	101000000	101000000	Ileum	EnhAWk	Enhancers	BTLTR1	LTR-ERVK	intergenic	gene-MPC1(dist=16988),gene-RPS6KA2(dist=4803)
9	101000000	101000000	Cecum	EnhAWk	Enhancers	BTLTR1	LTR-ERVK	intergenic	gene-MPC1(dist=17988),gene-RPS6KA2(dist=4803)
9	102000000	102000000	Ileum	EnhAWk	Enhancers	BTLTR1B	LTR-ERVK	intergenic	gene-FGFR1OP(dist=40047),gene-CCR6(dist=10959)
9	104000000	104000000	Rumen	EnhAWk	Enhancers	BTLTR1B	LTR-ERVK	intergenic	gene-ERMARD(dist=195817),gene-DLL1(dist=148604)
X	29766800	29767600	Abomasum	EnhAWk	Enhancers	ERV2-1B-LTR_BT	LTR-ERVK	intergenic	gene-LOC781895(dist=115085),gene-FMR1(dist=857730)
X	35930400	35930800	Jejunum	EnhAWk	Enhancers	BTLTR1D2	LTR-ERVK	intronic	gene-BRCC3
X	37974400	37975200	Liver	EnhAWk	Enhancers	LTR46_BT	LTR-ERVK	intergenic	gene-LOC783472(dist=28725),gene-LOC520584(dist=10204)
X	38198800	38199200	Liver	EnhAWk	Enhancers	ERV2-1C-LTR_BT	LTR-ERVK	intergenic	gene-LOC112441479(dist=101359),gene-LOC526488(dist=15762)
X	59756400	59756600	Colon	EnhAWk	Enhancers	ERV2-3-I_BT	LTR-ERVK	intronic	gene-DCX
X	64914400	64916200	Cecum	EnhAWk	Enhancers	ERV2-1C-LTR_BT	LTR-ERVK	intergenic	gene-LOC100847335(dist=268793),gene-DACH2(dist=265834)
X	72849600	72849800	Ileum	EnhAWk	Enhancers	ERV2-1-I_BT	LTR-ERVK	intergenic	gene-TBX22(dist=328133),gene-ITM2A(dist=132433)
X	72850400	72850800	Adipose	EnhAWk	Enhancers	ERV2-1-I_BT	LTR-ERVK	intergenic	gene-TBX22(dist=328933),gene-ITM2A(dist=131433)
X	82103800	82104000	Jejunum	EnhAWk	Enhancers	BTLTR1E1	LTR-ERVK	intronic	gene-OPHN1
X	82103800	82104000	Lung	EnhAWk	Enhancers	BTLTR1E1	LTR-ERVK	intronic	gene-OPHN1
X	106000000	106000000	Abomasum	EnhAWk	Enhancers	BTLTR1J	LTR-ERVK	intronic	gene-LANCL3
X	139000000	139000000	Rumen	EnhAWk	Enhancers	BTLTR1F	LTR-ERVK	intronic	gene-XG
X	139000000	139000000	Adipose	EnhAWk	Enhancers	BTLTR1F	LTR-ERVK	intronic	gene-XG
1	69371200	69371600	Cecum	EnhAHet	Enhancers	BTLTR1F	LTR-ERVK	intergenic	gene-MUC13(dist=13726),gene-HEG1(dist=46350)
1	71289600	71289800	Lung	EnhAHet	Enhancers	BTLTR1B1	LTR-ERVK	intronic	gene-PAK2
1	86495800	86496000	Abomasum	EnhAHet	Enhancers	ERV2-1B-LTR_BT	LTR-ERVK	intergenic	gene-TTC14(dist=113085),gene-PEX5L(dist=532584)
1	122000000	122000000	Rumen	EnhAHet	Enhancers	BTLTR1C	LTR-ERVK	intergenic	gene-PLSCR5(dist=28218),gene-PLSCR2(dist=39075)
1	145000000	145000000	Lung	EnhAHet	Enhancers	BTLTR1E1	LTR-ERVK	intronic	gene-PTTG1IP
1	145000000	145000000	Spleen	EnhAHet	Enhancers	BTLTR1E1	LTR-ERVK	intronic	gene-PTTG1IP
1	145000000	145000000	Duodenum	EnhAHet	Enhancers	BTLTR1E1	LTR-ERVK	intronic	gene-PTTG1IP
1	153000000	153000000	Rumen	EnhAHet	Enhancers	BTLTR1B1	LTR-ERVK	intronic	gene-COLQ
10	26109800	26110000	Liver	EnhAHet	Enhancers	ERV2-3-I_BT	LTR-ERVK	intergenic	gene-SLC39A2(dist=11937),gene-METTL17(dist=9571)
10	26295000	26295200	Abomasum	EnhAHet	Enhancers	BTLTR1J4	LTR-ERVK	ncRNA_intronic	gene-LOC783225
10	26755200	26756600	Lung	EnhAHet	Enhancers	ERV2-1-I_BT	LTR-ERVK	intergenic	gene-TEP1(dist=6619),gene-PARP2(dist=7555)
10	26757000	26757200	Lung	EnhAHet	Enhancers	ERV2-1-I_BT	LTR-ERVK	intergenic	gene-TEP1(dist=8419),gene-PARP2(dist=6955)
10	26757400	26757800	Jejunum	EnhAHet	Enhancers	ERV2-1-I_BT	LTR-ERVK	intergenic	gene-TEP1(dist=8819),gene-PARP2(dist=6355)
10	26757600	26759000	Lung	EnhAHet	Enhancers	ERV2-1-I_BT	LTR-ERVK	intergenic	gene-TEP1(dist=9019),gene-PARP2(dist=5155)
10	26757800	26758400	Cecum	EnhAHet	Enhancers	ERV2-1-I_BT	LTR-ERVK	intergenic	gene-TEP1(dist=9219),gene-PARP2(dist=5755)
10	26759400	26760600	Spleen	EnhAHet	Enhancers	ERV2-1-I_BT	LTR-ERVK	intergenic	gene-TEP1(dist=10819),gene-PARP2(dist=3555)
10	26760800	26761200	Spleen	EnhAHet	Enhancers	ERV2-1-I_BT	LTR-ERVK	intergenic	gene-TEP1(dist=12219),gene-PARP2(dist=2955)
10	26761000	26761200	Jejunum	EnhAHet	Enhancers	ERV2-1-I_BT	LTR-ERVK	intergenic	gene-TEP1(dist=12419),gene-PARP2(dist=2955)
10	26762000	26762200	Lung	EnhAHet	Enhancers	ERV2-1-I_BT	LTR-ERVK	intergenic	gene-TEP1(dist=13419),gene-PARP2(dist=1955)
10	67566800	67567000	Abomasum	EnhAHet	Enhancers	BTLTR1B	LTR-ERVK	intergenic	gene-MAPK1IP1L(dist=28476),gene-LGALS3(dist=44547)
11	14258000	14259400	Lung	EnhAHet	Enhancers	ERV2-1-I_BT	LTR-ERVK	intergenic	gene-XDH(dist=33460),gene-SRD5A2(dist=62814)
11	14259200	14259400	Liver	EnhAHet	Enhancers	ERV2-1-I_BT	LTR-ERVK	intergenic	gene-XDH(dist=34660),gene-SRD5A2(dist=62814)
11	21479600	21480400	Liver	EnhAHet	Enhancers	LTR7_BT	LTR-ERVK	intergenic	gene-SOS1(dist=44529),gene-CDKL4(dist=13720)
11	30127800	30128400	Jejunum	EnhAHet	Enhancers	LTR2C_BT	LTR-ERVK	intronic	gene-MSH6
11	30128000	30128400	Cecum	EnhAHet	Enhancers	LTR2C_BT	LTR-ERVK	intronic	gene-MSH6
11	49580000	49580200	Lung	EnhAHet	Enhancers	ERV2-1-LTR_BT	LTR-ERVK	intergenic	gene-SH2D6(dist=15208),gene-CAPG(dist=7662)
12	51858400	51858600	Lung	EnhAHet	Enhancers	BTLTR1B1	LTR-ERVK	intergenic	gene-LMO7(dist=961173),gene-KCTD12(dist=140299)
13	32220200	32220400	Jejunum	EnhAHet	Enhancers	BTLTR1B	LTR-ERVK	intronic	gene-TMEM236
13	39473400	39473600	Rumen	EnhAHet	Enhancers	BTLTR1F	LTR-ERVK	intronic	gene-RIN2
13	43391600	43391800	Liver	EnhAHet	Enhancers	BTLTR1B1	LTR-ERVK	intronic	gene-LOC782061
13	59914800	59915000	Cecum	EnhAHet	Enhancers	ERV2-1-I_BT	LTR-ERVK	intronic	gene-RAD21L1
13	72927000	72927200	Ileum	EnhAHet	Enhancers	ERV2-1B-LTR_BT	LTR-ERVK	intronic	gene-SERINC3
13	72928200	72928400	Ileum	EnhAHet	Enhancers	ERV2-1B-LTR_BT	LTR-ERVK	intronic	gene-SERINC3
15	3212800	3213000	Ileum	EnhAHet	Enhancers	BTLTR1C	LTR-ERVK	intergenic	gene-GRIA4(dist=715472),gene-CASP1(dist=19947)
15	51406200	51406600	Duodenum	EnhAHet	Enhancers	ERV2-1C-LTR_BT	LTR-ERVK	exonic	gene-LOC100336836
15	51406200	51406600	Jejunum	EnhAHet	Enhancers	ERV2-1C-LTR_BT	LTR-ERVK	exonic	gene-LOC100336836
15	57767600	57768400	Liver	EnhAHet	Enhancers	BTLTR1D2	LTR-ERVK	intronic	gene-BBOX1
15	65438200	65438400	Adipose	EnhAHet	Enhancers	BTLTR1B1	LTR-ERVK	intronic	gene-PDHX
15	80587400	80587800	Rumen	EnhAHet	Enhancers	BTLTR1B1	LTR-ERVK	UTR5	gene-PRG3
15	80604400	80604600	Rumen	EnhAHet	Enhancers	BTLTR1B1	LTR-ERVK	intergenic	gene-LOC781990(dist=3213),gene-PRG3-2(dist=12424)
15	84213800	84214000	Abomasum	EnhAHet	Enhancers	ERV2-1-I_BT	LTR-ERVK	intergenic	gene-OR4A15(dist=57232),gene-LOC104970693(dist=2460)
16	23565400	23566000	Abomasum	EnhAHet	Enhancers	ERV2-1C-LTR_BT	LTR-ERVK	intronic	gene-BPNT1
16	38853800	38854000	Liver	EnhAHet	Enhancers	LTR3_BT	LTR-ERVK	intergenic	gene-FMO1(dist=4725),gene-FMO4(dist=11158)
17	62284800	62285000	Duodenum	EnhAHet	Enhancers	ERV2-1B-LTR_BT	LTR-ERVK	intronic	gene-MAPKAPK5
17	71442800	71443000	Duodenum	EnhAHet	Enhancers	BTLTR1	LTR-ERVK	downstream	gene-GGT5
18	1885800	1886000	Jejunum	EnhAHet	Enhancers	BTLTR1E	LTR-ERVK	intronic	gene-PDPR
18	34753200	34753400	Jejunum	EnhAHet	Enhancers	BTLTR1F	LTR-ERVK	downstream	gene-CBFB
19	14240600	14240800	Lung	EnhAHet	Enhancers	ERV2-2B_BT-LTR	LTR-ERVK	intergenic	gene-LOC515676(dist=6100),gene-LOC525415(dist=2858)
2	2222200	2223600	Cecum	EnhAHet	Enhancers	ERV2-1-I_BT	LTR-ERVK	intergenic	gene-PLEKHB2(dist=252404),gene-HS6ST1(dist=1963787)
2	106000000	106000000	Ileum	EnhAHet	Enhancers	ERV2-1-LTR_BT	LTR-ERVK	intronic	gene-PNKD
2	125000000	125000000	Liver	EnhAHet	Enhancers	LTR3_BT	LTR-ERVK	intronic	gene-SMPDL3B
2	130000000	130000000	Abomasum	EnhAHet	Enhancers	BTLTR1F	LTR-ERVK	intronic	gene-ZBTB40
21	67176400	67177000	Rumen	EnhAHet	Enhancers	ERV2-1C-LTR_BT	LTR-ERVK	intronic	gene-TECPR2
22	6786800	6787600	Abomasum	EnhAHet	Enhancers	BTLTR1E1	LTR-ERVK	intronic	gene-CMTM8
22	52931800	52932000	Abomasum	EnhAHet	Enhancers	BTLTR1C	LTR-ERVK	downstream	gene-LRRC2
22	52931800	52932000	Cecum	EnhAHet	Enhancers	BTLTR1C	LTR-ERVK	downstream	gene-LRRC2
22	52931800	52932000	Rumen	EnhAHet	Enhancers	BTLTR1C	LTR-ERVK	downstream	gene-LRRC2
23	2759600	2759800	Liver	EnhAHet	Enhancers	LTR2_BT	LTR-ERVK	intronic	gene-PRIM2
23	26726200	26726800	Abomasum	EnhAHet	Enhancers	ERV2-1C-LTR_BT	LTR-ERVK	intergenic	gene-LOC112443756(dist=39576),gene-LOC100847986(dist=91308)
23	26726600	26727000	Ileum	EnhAHet	Enhancers	ERV2-1C-LTR_BT	LTR-ERVK	intergenic	gene-LOC112443756(dist=39976),gene-LOC100847986(dist=91108)
23	28061400	28062000	Abomasum	EnhAHet	Enhancers	BTLTR1F	LTR-ERVK	intergenic	gene-LOC616942(dist=2002),gene-TRNAG-CCC-150(dist=5605)
24	3962600	3962800	Lung	EnhAHet	Enhancers	BTLTR1	LTR-ERVK	intergenic	gene-LOC112444151(dist=4038),gene-CNDP1(dist=1629)
24	46481800	46482000	Hypothalamus	EnhAHet	Enhancers	BTLTR1C	LTR-ERVK	intronic	gene-ST8SIA5
25	2165600	2166000	Lung	EnhAHet	Enhancers	ERV2-2B_BT-I	LTR-ERVK	intergenic	gene-PRSS27(dist=32638),gene-PRSS22(dist=12175)
26	16173200	16173400	Liver	EnhAHet	Enhancers	BTLTR1F	LTR-ERVK	intronic	gene-CYP2C87
26	25635800	25636200	Liver	EnhAHet	Enhancers	BTLTR1D2	LTR-ERVK	intronic	gene-ECHS1,gene-SORCS3
27	25155400	25155600	Abomasum	EnhAHet	Enhancers	BTLTR1B	LTR-ERVK	intergenic	gene-ERI1(dist=76622),gene-PPP1R3B(dist=22567)
28	14939200	14939400	Cecum	EnhAHet	Enhancers	ERV2-1C-LTR_BT	LTR-ERVK	intronic	gene-FAM13C
28	29678200	29678600	Cecum	EnhAHet	Enhancers	LTR46_BT	LTR-ERVK	upstream	gene-CHCHD1
29	41171800	41172000	Ileum	EnhAHet	Enhancers	ERV2-1-I_BT	LTR-ERVK	intronic	gene-SLC3A2
29	41172400	41172600	Ileum	EnhAHet	Enhancers	ERV2-1-I_BT	LTR-ERVK	intronic	gene-SLC3A2
29	41172400	41172600	Jejunum	EnhAHet	Enhancers	ERV2-1-I_BT	LTR-ERVK	intronic	gene-SLC3A2
29	44421800	44422000	Abomasum	EnhAHet	Enhancers	ERV2-1C-LTR_BT	LTR-ERVK	intergenic	gene-SLC29A2(dist=2854),gene-NPAS4(dist=42286)
29	44421800	44422000	Jejunum	EnhAHet	Enhancers	ERV2-1C-LTR_BT	LTR-ERVK	intergenic	gene-SLC29A2(dist=2854),gene-NPAS4(dist=42286)
29	50928600	50929000	Duodenum	EnhAHet	Enhancers	ERV2-1-I_BT	LTR-ERVK	intergenic	gene-B4GALNT4(dist=19410),gene-IFITM3(dist=1482)
29	50929000	50929800	Abomasum	EnhAHet	Enhancers	ERV2-1-I_BT	LTR-ERVK	upstream	gene-IFITM3
29	50929000	50930000	Lung	EnhAHet	Enhancers	ERV2-1-I_BT	LTR-ERVK	upstream	gene-IFITM3
29	50929200	50929400	Cecum	EnhAHet	Enhancers	ERV2-1-I_BT	LTR-ERVK	intergenic	gene-B4GALNT4(dist=20010),gene-IFITM3(dist=1082)
29	50929600	50930000	Cecum	EnhAHet	Enhancers	ERV2-1-I_BT	LTR-ERVK	upstream	gene-IFITM3
3	10699800	10700000	Adipose	EnhAHet	Enhancers	BTLTR1D2	LTR-ERVK	upstream	gene-IFI16
3	19397200	19397400	Liver	EnhAHet	Enhancers	BTLTR1D	LTR-ERVK	intergenic	gene-PSMB4(dist=23816),gene-SELENBP1(dist=45281)
3	101000000	101000000	Abomasum	EnhAHet	Enhancers	BTLTR1F	LTR-ERVK	intergenic	gene-AKR1A1(dist=6872),gene-PRDX1(dist=27141)
3	101000000	101000000	Duodenum	EnhAHet	Enhancers	BTLTR1F	LTR-ERVK	intergenic	gene-AKR1A1(dist=7072),gene-PRDX1(dist=27141)
3	101000000	101000000	Abomasum	EnhAHet	Enhancers	BTLTR1F	LTR-ERVK	intergenic	gene-AKR1A1(dist=8072),gene-PRDX1(dist=26141)
3	113000000	113000000	Ileum	EnhAHet	Enhancers	BTLTR1F	LTR-ERVK	intronic	gene-USP40
3	113000000	113000000	Abomasum	EnhAHet	Enhancers	BTLTR1F	LTR-ERVK	intronic	gene-USP40
3	117000000	117000000	Lung	EnhAHet	Enhancers	BTLTR1	LTR-ERVK	intronic	gene-LRRFIP1
3	119000000	119000000	Cecum	EnhAHet	Enhancers	ERV2-1-I_BT	LTR-ERVK	intronic	gene-NDUFA10
3	121000000	121000000	Cecum	EnhAHet	Enhancers	ERV2-1B-LTR_BT	LTR-ERVK	intergenic	gene-D2HGDH(dist=7817),gene-GAL3ST2(dist=1677)
3	121000000	121000000	Colon	EnhAHet	Enhancers	ERV2-1B-LTR_BT	LTR-ERVK	intergenic	gene-D2HGDH(dist=7817),gene-GAL3ST2(dist=1677)
3	121000000	121000000	Jejunum	EnhAHet	Enhancers	ERV2-1B-LTR_BT	LTR-ERVK	intergenic	gene-D2HGDH(dist=7817),gene-GAL3ST2(dist=1677)
3	121000000	121000000	Cecum	EnhAHet	Enhancers	ERV2-1B-LTR_BT	LTR-ERVK	upstream	gene-GAL3ST2
5	75304200	75304400	Lung	EnhAHet	Enhancers	BTLTR1C	LTR-ERVK	intergenic	gene-NCF4(dist=19794),gene-CSF2RB(dist=44716)
5	100000000	100000000	Lung	EnhAHet	Enhancers	ERV2-1C-LTR_BT	LTR-ERVK	intergenic	gene-LOC509972(dist=10379),gene-LOC784451(dist=4613)
5	112000000	112000000	Cecum	EnhAHet	Enhancers	ERV2-1-LTR_BT	LTR-ERVK	intronic	gene-ADSL
5	114000000	114000000	Jejunum	EnhAHet	Enhancers	BTLTR1B	LTR-ERVK	intergenic	gene-MCAT(dist=1517),gene-TSPO(dist=6247)
6	1915600	1916000	Abomasum	EnhAHet	Enhancers	BTLTR1F	LTR-ERVK	intergenic	gene-APELA(dist=1768609),gene-MARCH1(dist=54099)
6	25231000	25231200	Liver	EnhAHet	Enhancers	LTR3_BT	LTR-ERVK	intergenic	gene-ADH7(dist=40171),gene-ADH1C(dist=50201)
6	84885600	84886000	Abomasum	EnhAHet	Enhancers	BTLTR1F	LTR-ERVK	intergenic	gene-LOC526979(dist=37898),gene-LOC781988(dist=63480)
6	88884600	88885000	Abomasum	EnhAHet	Enhancers	ERV2-1C-LTR_BT	LTR-ERVK	intergenic	gene-CXCL8(dist=70029),gene-LOC534181(dist=2143)
6	91150000	91150600	Ileum	EnhAHet	Enhancers	ERV2-1C-LTR_BT	LTR-ERVK	intergenic	gene-SCARB2(dist=19017),gene-FAM47E(dist=16664)
6	94262200	94262400	Adipose	EnhAHet	Enhancers	BTLTR1	LTR-ERVK	intergenic	gene-LOC784058(dist=120160),gene-ANTXR2(dist=317476)
6	105000000	105000000	Colon	EnhAHet	Enhancers	BTLTR1E	LTR-ERVK	intergenic	gene-SLC2A9(dist=32332),gene-WDR1(dist=33391)
7	15177200	15178600	Jejunum	EnhAHet	Enhancers	ERV2-1-I_BT	LTR-ERVK	intergenic	gene-ILF3(dist=9772),gene-QTRT1(dist=9613)
7	15177600	15178800	Cecum	EnhAHet	Enhancers	ERV2-1-I_BT	LTR-ERVK	intergenic	gene-ILF3(dist=10172),gene-QTRT1(dist=9413)
7	15177800	15178000	Ileum	EnhAHet	Enhancers	ERV2-1-I_BT	LTR-ERVK	intergenic	gene-ILF3(dist=10372),gene-QTRT1(dist=10213)
7	62720800	62721000	Abomasum	EnhAHet	Enhancers	ERV2-1-I_BT	LTR-ERVK	exonic	gene-BERV-K1,gene-SLC36A1
7	62721400	62721600	Abomasum	EnhAHet	Enhancers	ERV2-1-I_BT	LTR-ERVK	exonic	gene-BERV-K1
7	93942400	93942600	Abomasum	EnhAHet	Enhancers	BTLTR1B	LTR-ERVK	intronic	gene-KIAA0825
8	38863400	38863600	Ileum	EnhAHet	Enhancers	LTR3_BT	LTR-ERVK	intergenic	gene-MLANA(dist=47790),gene-ERMP1(dist=23288)
8	110000000	110000000	Lung	EnhAHet	Enhancers	BTLTR1B	LTR-ERVK	intergenic	gene-C5(dist=44630),gene-CNTRL(dist=25413)
9	12895200	12895400	Spleen	EnhAHet	Enhancers	ERV2-1-I_BT	LTR-ERVK	intergenic	gene-LOC104972961(dist=52847),gene-CGAS(dist=36976)
9	12899600	12900000	Cecum	EnhAHet	Enhancers	ERV2-1-I_BT	LTR-ERVK	intergenic	gene-LOC104972961(dist=57247),gene-CGAS(dist=32376)
9	12902400	12902600	Cecum	EnhAHet	Enhancers	ERV2-1-I_BT	LTR-ERVK	intergenic	gene-LOC104972961(dist=60047),gene-CGAS(dist=29776)
9	101000000	101000000	Abomasum	EnhAHet	Enhancers	BTLTR1	LTR-ERVK	intergenic	gene-MPC1(dist=18188),gene-RPS6KA2(dist=4603)
9	101000000	101000000	Duodenum	EnhAHet	Enhancers	BTLTR1	LTR-ERVK	intergenic	gene-MPC1(dist=18188),gene-RPS6KA2(dist=4603)
1	42906200	42906400	Liver	EnhPois	Enhancers	ERV2-1B-LTR_BT	LTR-ERVK	intergenic	gene-CPOX(dist=4786),gene-ST3GAL6(dist=117447)
1	42984800	42985000	Liver	EnhPois	Enhancers	ERV2-3-LTR_BT	LTR-ERVK	intergenic	gene-CPOX(dist=83386),gene-ST3GAL6(dist=38847)
1	42984800	42985000	Rumen	EnhPois	Enhancers	ERV2-3-LTR_BT	LTR-ERVK	intergenic	gene-CPOX(dist=83386),gene-ST3GAL6(dist=38847)
1	52529800	52530000	Lung	EnhPois	Enhancers	LTR2B_BT	LTR-ERVK	intergenic	gene-BBX(dist=98599),gene-CD47(dist=180621)
1	54852400	54854200	Lung	EnhPois	Enhancers	BTLTR1C	LTR-ERVK	intergenic	gene-LOC614129(dist=2018),gene-TRNAE-UUC(dist=508308)
1	57171000	57171200	Lung	EnhPois	Enhancers	ERV2-1B-LTR_BT	LTR-ERVK	intronic	gene-CD200
1	57303600	57304000	Lung	EnhPois	Enhancers	ERV2-1B-LTR_BT	LTR-ERVK	intergenic	gene-BTLA(dist=41863),gene-ATG3(dist=5111)
1	69370400	69372000	Jejunum	EnhPois	Enhancers	BTLTR1F	LTR-ERVK	intergenic	gene-MUC13(dist=12926),gene-HEG1(dist=45950)
1	71289600	71289800	Adipose	EnhPois	Enhancers	BTLTR1B1	LTR-ERVK	intronic	gene-PAK2
1	83211400	83211600	Colon	EnhPois	Enhancers	BTLTR1E2	LTR-ERVK	intergenic	gene-ABCC5(dist=6168),gene-LOC782787(dist=13757)
1	104000000	104000000	Lung	EnhPois	Enhancers	LTR2B_BT	LTR-ERVK	intergenic	gene-SI(dist=1122086),gene-TRNAS-GGA-4(dist=881991)
1	118000000	118000000	Cortex	EnhPois	Enhancers	BTLTR1E1	LTR-ERVK	intronic	gene-RNF13
1	122000000	122000000	Abomasum	EnhPois	Enhancers	BTLTR1F	LTR-ERVK	intergenic	gene-PLSCR5(dist=2618),gene-PLSCR2(dist=64675)
1	122000000	122000000	Lung	EnhPois	Enhancers	BTLTR1C	LTR-ERVK	intergenic	gene-PLSCR5(dist=27218),gene-PLSCR2(dist=39075)
1	122000000	122000000	Cecum	EnhPois	Enhancers	BTLTR1F	LTR-ERVK	intronic	gene-PLSCR2
1	122000000	122000000	Lung	EnhPois	Enhancers	BTLTR1F	LTR-ERVK	intronic	gene-PLSCR2
1	122000000	122000000	Jejunum	EnhPois	Enhancers	BTLTR1F	LTR-ERVK	intronic	gene-PLSCR2
1	122000000	122000000	Jejunum	EnhPois	Enhancers	BTLTR1F	LTR-ERVK	intronic	gene-PLSCR2
1	122000000	122000000	Lung	EnhPois	Enhancers	BTLTR1F	LTR-ERVK	intronic	gene-PLSCR2
1	139000000	139000000	Abomasum	EnhPois	Enhancers	ERV2-1B-LTR_BT	LTR-ERVK	intronic	gene-LCA5L
1	140000000	140000000	Colon	EnhPois	Enhancers	LTR3_BT	LTR-ERVK	intronic	gene-B3GALT5
1	144000000	144000000	Liver	EnhPois	Enhancers	BTLTR1	LTR-ERVK	intergenic	gene-TRPM2(dist=7197),gene-LRRC3(dist=4402)
1	146000000	146000000	Rumen	EnhPois	Enhancers	LTR2B_BT	LTR-ERVK	intergenic	gene-PRMT2(dist=130332),gene-FBXO25(dist=51886)
1	148000000	148000000	Duodenum	EnhPois	Enhancers	BTLTR1J4	LTR-ERVK	intronic	gene-SETD4
1	148000000	148000000	Jejunum	EnhPois	Enhancers	BTLTR1J4	LTR-ERVK	intronic	gene-SETD4
1	153000000	153000000	Lung	EnhPois	Enhancers	BTLTR1B1	LTR-ERVK	intronic	gene-COLQ
1	153000000	153000000	Jejunum	EnhPois	Enhancers	BTLTR1B1	LTR-ERVK	intergenic	gene-COLQ(dist=49080),gene-HACL1(dist=1611)
10	5031600	5032200	Liver	EnhPois	Enhancers	BTLTR1	LTR-ERVK	intronic	gene-SIMC1
10	6640000	6640200	Duodenum	EnhPois	Enhancers	BTLTR1B	LTR-ERVK	intronic	gene-ANKRD31
10	11270400	11270600	Spleen	EnhPois	Enhancers	BTLTR1D2	LTR-ERVK	intergenic	gene-SERINC5(dist=53580),NONE(dist=NONE)
10	11328600	11328800	Abomasum	EnhPois	Enhancers	ERV2-1-LTR_BT	LTR-ERVK	intergenic	gene-SERINC5(dist=111780),NONE(dist=NONE)
10	11344000	11344800	Jejunum	EnhPois	Enhancers	ERV2-3-LTR_BT	LTR-ERVK	intergenic	gene-SERINC5(dist=127180),gene-STYX(dist=8002)
10	11344400	11345000	Abomasum	EnhPois	Enhancers	ERV2-3-LTR_BT	LTR-ERVK	intergenic	gene-SERINC5(dist=127580),gene-STYX(dist=7802)
10	20897800	20898400	Lung	EnhPois	Enhancers	LTR2C_BT	LTR-ERVK	exonic	gene-RABGGTA
10	20897800	20898600	Liver	EnhPois	Enhancers	LTR2C_BT	LTR-ERVK	exonic	gene-RABGGTA
10	20897800	20898800	Jejunum	EnhPois	Enhancers	LTR2C_BT	LTR-ERVK	exonic	gene-RABGGTA
10	26099200	26099600	Lung	EnhPois	Enhancers	BTLTR1J	LTR-ERVK	intergenic	gene-SLC39A2(dist=1337),gene-METTL17(dist=19971)
10	26109400	26110000	Lung	EnhPois	Enhancers	ERV2-3-I_BT	LTR-ERVK	intergenic	gene-SLC39A2(dist=11537),gene-METTL17(dist=9571)
10	26109600	26109800	Liver	EnhPois	Enhancers	ERV2-3-I_BT	LTR-ERVK	intergenic	gene-SLC39A2(dist=11737),gene-METTL17(dist=9771)
10	26109800	26110000	Abomasum	EnhPois	Enhancers	ERV2-3-I_BT	LTR-ERVK	intergenic	gene-SLC39A2(dist=11937),gene-METTL17(dist=9571)
10	26118400	26119200	Lung	EnhPois	Enhancers	BTLTR1J	LTR-ERVK	downstream	gene-METTL17
10	26294600	26295200	Colon	EnhPois	Enhancers	BTLTR1J4	LTR-ERVK	ncRNA_intronic	gene-LOC783225
10	26295000	26295200	Cecum	EnhPois	Enhancers	BTLTR1J4	LTR-ERVK	ncRNA_intronic	gene-LOC783225
10	26295000	26295200	Ileum	EnhPois	Enhancers	BTLTR1J4	LTR-ERVK	ncRNA_intronic	gene-LOC783225
10	26577600	26577800	Colon	EnhPois	Enhancers	BTLTR1	LTR-ERVK	intergenic	gene-RNASE11(dist=65044),gene-RNASE10(dist=14970)
10	26577600	26577800	Jejunum	EnhPois	Enhancers	BTLTR1	LTR-ERVK	intergenic	gene-RNASE11(dist=65044),gene-RNASE10(dist=14970)
10	26754600	26755200	Lung	EnhPois	Enhancers	ERV2-1-I_BT	LTR-ERVK	intergenic	gene-TEP1(dist=6019),gene-PARP2(dist=8955)
10	26754600	26755400	Colon	EnhPois	Enhancers	ERV2-1-I_BT	LTR-ERVK	intergenic	gene-TEP1(dist=6019),gene-PARP2(dist=8755)
10	26754600	26756600	Cecum	EnhPois	Enhancers	ERV2-1-I_BT	LTR-ERVK	intergenic	gene-TEP1(dist=6019),gene-PARP2(dist=7555)
10	26754800	26755600	Abomasum	EnhPois	Enhancers	ERV2-1-I_BT	LTR-ERVK	intergenic	gene-TEP1(dist=6219),gene-PARP2(dist=8555)
10	26755400	26757600	Spleen	EnhPois	Enhancers	ERV2-1-I_BT	LTR-ERVK	intergenic	gene-TEP1(dist=6819),gene-PARP2(dist=6555)
10	26756800	26757800	Cecum	EnhPois	Enhancers	ERV2-1-I_BT	LTR-ERVK	intergenic	gene-TEP1(dist=8219),gene-PARP2(dist=6355)
10	26757000	26757600	Colon	EnhPois	Enhancers	ERV2-1-I_BT	LTR-ERVK	intergenic	gene-TEP1(dist=8419),gene-PARP2(dist=6555)
10	26757200	26757600	Lung	EnhPois	Enhancers	ERV2-1-I_BT	LTR-ERVK	intergenic	gene-TEP1(dist=8619),gene-PARP2(dist=6555)
10	26757400	26758200	Liver	EnhPois	Enhancers	ERV2-1-I_BT	LTR-ERVK	intergenic	gene-TEP1(dist=8819),gene-PARP2(dist=5955)
10	26758000	26759400	Spleen	EnhPois	Enhancers	ERV2-1-I_BT	LTR-ERVK	intergenic	gene-TEP1(dist=9419),gene-PARP2(dist=4755)
10	26758000	26760200	Colon	EnhPois	Enhancers	ERV2-1-I_BT	LTR-ERVK	intergenic	gene-TEP1(dist=9419),gene-PARP2(dist=3955)
10	26758400	26759400	Cecum	EnhPois	Enhancers	ERV2-1-I_BT	LTR-ERVK	intergenic	gene-TEP1(dist=9819),gene-PARP2(dist=4755)
10	26759000	26760200	Lung	EnhPois	Enhancers	ERV2-1-I_BT	LTR-ERVK	intergenic	gene-TEP1(dist=10419),gene-PARP2(dist=3955)
10	26759400	26760400	Adipose	EnhPois	Enhancers	ERV2-1-I_BT	LTR-ERVK	intergenic	gene-TEP1(dist=10819),gene-PARP2(dist=3755)
10	26759400	26761000	Duodenum	EnhPois	Enhancers	ERV2-1-I_BT	LTR-ERVK	intergenic	gene-TEP1(dist=10819),gene-PARP2(dist=3155)
10	26759800	26760400	Cecum	EnhPois	Enhancers	ERV2-1-I_BT	LTR-ERVK	intergenic	gene-TEP1(dist=11219),gene-PARP2(dist=3755)
10	26760000	26760400	Jejunum	EnhPois	Enhancers	ERV2-1-I_BT	LTR-ERVK	intergenic	gene-TEP1(dist=11419),gene-PARP2(dist=3755)
10	26760200	26760400	Ileum	EnhPois	Enhancers	ERV2-1-I_BT	LTR-ERVK	intergenic	gene-TEP1(dist=11619),gene-PARP2(dist=3755)
10	26760400	26760600	Lung	EnhPois	Enhancers	ERV2-1-I_BT	LTR-ERVK	intergenic	gene-TEP1(dist=11819),gene-PARP2(dist=3555)
10	26760600	26760800	Spleen	EnhPois	Enhancers	ERV2-1-I_BT	LTR-ERVK	intergenic	gene-TEP1(dist=12019),gene-PARP2(dist=3355)
10	26760800	26761000	Lung	EnhPois	Enhancers	ERV2-1-I_BT	LTR-ERVK	intergenic	gene-TEP1(dist=12219),gene-PARP2(dist=3155)
10	26761800	26762000	Lung	EnhPois	Enhancers	ERV2-1-I_BT	LTR-ERVK	intergenic	gene-TEP1(dist=13219),gene-PARP2(dist=2155)
10	26761800	26762400	Colon	EnhPois	Enhancers	ERV2-1-I_BT	LTR-ERVK	intergenic	gene-TEP1(dist=13219),gene-PARP2(dist=1755)
10	26762200	26762400	Lung	EnhPois	Enhancers	ERV2-1-I_BT	LTR-ERVK	intergenic	gene-TEP1(dist=13619),gene-PARP2(dist=1755)
10	26762600	26763200	Lung	EnhPois	Enhancers	BTLTR1C	LTR-ERVK	downstream	gene-PARP2
10	26762800	26763200	Colon	EnhPois	Enhancers	BTLTR1C	LTR-ERVK	downstream	gene-PARP2
10	39281000	39282000	Colon	EnhPois	Enhancers	ERV2-1C-LTR_BT	LTR-ERVK	intergenic	gene-EPB42(dist=856656),gene-RPL10L(dist=365703)
10	39281200	39282200	Lung	EnhPois	Enhancers	ERV2-1C-LTR_BT	LTR-ERVK	intergenic	gene-EPB42(dist=856856),gene-RPL10L(dist=365503)
10	39281400	39282000	Abomasum	EnhPois	Enhancers	ERV2-1C-LTR_BT	LTR-ERVK	intergenic	gene-EPB42(dist=857056),gene-RPL10L(dist=365703)
10	39281400	39282200	Duodenum	EnhPois	Enhancers	ERV2-1C-LTR_BT	LTR-ERVK	intergenic	gene-EPB42(dist=857056),gene-RPL10L(dist=365503)
10	39282400	39282600	Cecum	EnhPois	Enhancers	ERV2-1C-LTR_BT	LTR-ERVK	intergenic	gene-EPB42(dist=858056),gene-RPL10L(dist=365103)
10	39282400	39282600	Colon	EnhPois	Enhancers	ERV2-1C-LTR_BT	LTR-ERVK	intergenic	gene-EPB42(dist=858056),gene-RPL10L(dist=365103)
10	39282400	39282600	Duodenum	EnhPois	Enhancers	ERV2-1C-LTR_BT	LTR-ERVK	intergenic	gene-EPB42(dist=858056),gene-RPL10L(dist=365103)
10	67566800	67567000	Lung	EnhPois	Enhancers	BTLTR1B	LTR-ERVK	intergenic	gene-MAPK1IP1L(dist=28476),gene-LGALS3(dist=44547)
10	74665000	74665600	Colon	EnhPois	Enhancers	LTR46_BT	LTR-ERVK	intergenic	gene-TRNAC-GCA-131(dist=81526),gene-KCNH5(dist=274863)
10	76505800	76507600	Lung	EnhPois	Enhancers	BTLTR1C	LTR-ERVK	downstream	gene-LOC100297513
10	78037600	78037800	Abomasum	EnhPois	Enhancers	BTLTR1	LTR-ERVK	intergenic	gene-FUT8(dist=199445),gene-TRNAR-CCU-10(dist=91926)
10	78038400	78038600	Abomasum	EnhPois	Enhancers	BTLTR1	LTR-ERVK	intergenic	gene-FUT8(dist=200245),gene-TRNAR-CCU-10(dist=91126)
10	78274000	78274200	Lung	EnhPois	Enhancers	BTLTR1	LTR-ERVK	intergenic	gene-TRNAR-CCU-10(dist=144202),gene-CCDC196(dist=261350)
10	78523000	78523400	Lung	EnhPois	Enhancers	BTLTR1B	LTR-ERVK	intergenic	gene-TRNAR-CCU-10(dist=393202),gene-CCDC196(dist=12150)
10	81140200	81140400	Ileum	EnhPois	Enhancers	BTLTR1	LTR-ERVK	intronic	gene-GALNT16
10	102000000	102000000	Lung	EnhPois	Enhancers	BTLTR1C	LTR-ERVK	intergenic	gene-TTC7B(dist=26367),gene-RPS6KA5(dist=16229)
10	103000000	103000000	Ileum	EnhPois	Enhancers	BTLTR1	LTR-ERVK	intronic	gene-RPS6KA5
11	3058000	3059000	Spleen	EnhPois	Enhancers	BTLTR1B1	LTR-ERVK	intronic	gene-ZAP70
11	3060800	3061000	Spleen	EnhPois	Enhancers	ERV2-1-I_BT	LTR-ERVK	intronic	gene-ZAP70
11	3061200	3062400	Spleen	EnhPois	Enhancers	ERV2-1-I_BT	LTR-ERVK	intronic	gene-ZAP70
11	7131200	7132600	Duodenum	EnhPois	Enhancers	BTLTR1	LTR-ERVK	intronic	gene-IL1RL1
11	14258400	14259400	Spleen	EnhPois	Enhancers	ERV2-1-I_BT	LTR-ERVK	intergenic	gene-XDH(dist=33860),gene-SRD5A2(dist=62814)
11	14259400	14263200	Lung	EnhPois	Enhancers	ERV2-1-I_BT	LTR-ERVK	intergenic	gene-XDH(dist=34860),gene-SRD5A2(dist=59014)
11	30127600	30128200	Liver	EnhPois	Enhancers	LTR2C_BT	LTR-ERVK	intronic	gene-MSH6
11	47192000	47192600	Colon	EnhPois	Enhancers	ERV2-1B-LTR_BT	LTR-ERVK	intergenic	gene-PAX8(dist=210729),gene-LOC112448784(dist=25535)
11	47192000	47192800	Cecum	EnhPois	Enhancers	ERV2-1B-LTR_BT	LTR-ERVK	intergenic	gene-PAX8(dist=210729),gene-LOC112448784(dist=25335)
11	47192200	47193200	Ileum	EnhPois	Enhancers	ERV2-1B-LTR_BT	LTR-ERVK	intergenic	gene-PAX8(dist=210929),gene-LOC112448784(dist=24935)
11	47193000	47193400	Lung	EnhPois	Enhancers	ERV2-1B-LTR_BT	LTR-ERVK	intergenic	gene-PAX8(dist=211729),gene-LOC112448784(dist=24735)
11	48161000	48162200	Colon	EnhPois	Enhancers	ERV2-1B-LTR_BT	LTR-ERVK	intronic	gene-RMND5A
11	66676800	66677800	Abomasum	EnhPois	Enhancers	BTLTR1B	LTR-ERVK	intergenic	gene-PPP3R1(dist=9361),gene-CNRIP1(dist=25101)
11	66676800	66678000	Colon	EnhPois	Enhancers	BTLTR1B	LTR-ERVK	intergenic	gene-PPP3R1(dist=9361),gene-CNRIP1(dist=24901)
11	68115400	68116200	Colon	EnhPois	Enhancers	LTR2C_BT	LTR-ERVK	intergenic	gene-AAK1(dist=124049),gene-ANXA4(dist=8689)
11	68115400	68116200	Jejunum	EnhPois	Enhancers	LTR2C_BT	LTR-ERVK	intergenic	gene-AAK1(dist=124049),gene-ANXA4(dist=8689)
11	84281200	84281400	Colon	EnhPois	Enhancers	LTR3_BT	LTR-ERVK	intergenic	gene-LOC782101(dist=189458),gene-TRIB2(dist=955700)
11	84585400	84586000	Cecum	EnhPois	Enhancers	ERV2-2B_BT-I	LTR-ERVK	intergenic	gene-LOC782101(dist=493658),gene-TRIB2(dist=651100)
11	84585800	84586000	Jejunum	EnhPois	Enhancers	ERV2-2B_BT-I	LTR-ERVK	intergenic	gene-LOC782101(dist=494058),gene-TRIB2(dist=651100)
11	98766600	98767000	Jejunum	EnhPois	Enhancers	BTLTR1F	LTR-ERVK	intergenic	gene-PTGES2(dist=2550),gene-LCN2(dist=14719)
11	98767200	98768000	Jejunum	EnhPois	Enhancers	BTLTR1F	LTR-ERVK	intergenic	gene-PTGES2(dist=3150),gene-LCN2(dist=13719)
12	29592000	29593600	Duodenum	EnhPois	Enhancers	ERV2-1C-LTR_BT	LTR-ERVK	intronic	gene-LOC788183
12	29592600	29593400	Cecum	EnhPois	Enhancers	ERV2-1C-LTR_BT	LTR-ERVK	intronic	gene-LOC788183
12	29592800	29593200	Colon	EnhPois	Enhancers	ERV2-1C-LTR_BT	LTR-ERVK	intronic	gene-LOC788183
12	29592800	29593600	Lung	EnhPois	Enhancers	ERV2-1C-LTR_BT	LTR-ERVK	intronic	gene-LOC788183
12	29593200	29593400	Ileum	EnhPois	Enhancers	ERV2-1C-LTR_BT	LTR-ERVK	intronic	gene-LOC788183
12	29593800	29594000	Duodenum	EnhPois	Enhancers	ERV2-1C-LTR_BT	LTR-ERVK	intronic	gene-LOC788183
12	37259400	37259800	Cecum	EnhPois	Enhancers	ERV2-1C-LTR_BT	LTR-ERVK	intergenic	gene-ATP12A(dist=595214),gene-LOC781692(dist=137835)
12	37259400	37259800	Duodenum	EnhPois	Enhancers	ERV2-1C-LTR_BT	LTR-ERVK	intergenic	gene-ATP12A(dist=595214),gene-LOC781692(dist=137835)
12	37259600	37259800	Colon	EnhPois	Enhancers	ERV2-1C-LTR_BT	LTR-ERVK	intergenic	gene-ATP12A(dist=595414),gene-LOC781692(dist=137835)
12	40353600	40354400	Cortex	EnhPois	Enhancers	BTLTR1J4	LTR-ERVK	intronic	gene-PCDH9
12	51858200	51858400	Lung	EnhPois	Enhancers	BTLTR1B1	LTR-ERVK	intergenic	gene-LMO7(dist=960973),gene-KCTD12(dist=140499)
12	51858400	51858600	Cecum	EnhPois	Enhancers	BTLTR1B1	LTR-ERVK	intergenic	gene-LMO7(dist=961173),gene-KCTD12(dist=140299)
12	51858400	51858600	Colon	EnhPois	Enhancers	BTLTR1B1	LTR-ERVK	intergenic	gene-LMO7(dist=961173),gene-KCTD12(dist=140299)
12	51872800	51873000	Ileum	EnhPois	Enhancers	BTLTR1	LTR-ERVK	intergenic	gene-LMO7(dist=975573),gene-KCTD12(dist=125899)
12	52049800	52050200	Lung	EnhPois	Enhancers	BTLTR1E2	LTR-ERVK	intergenic	gene-KCTD12(dist=44743),gene-ACOD1(dist=18516)
12	52597200	52597600	Lung	EnhPois	Enhancers	BTLTR1J	LTR-ERVK	intergenic	gene-MYCBP2(dist=177187),gene-SCEL(dist=85826)
12	57263000	57263400	Lung	EnhPois	Enhancers	BTLTR1E3	LTR-ERVK	intergenic	gene-MIR1256(dist=85257),gene-TRNAC-GCA-158(dist=1229703)
12	60919600	60920600	Abomasum	EnhPois	Enhancers	ERV2-1C-LTR_BT	LTR-ERVK	intergenic	gene-SLITRK6(dist=217408),gene-SLITRK5(dist=1372000)
12	60919600	60920600	Cecum	EnhPois	Enhancers	ERV2-1C-LTR_BT	LTR-ERVK	intergenic	gene-SLITRK6(dist=217408),gene-SLITRK5(dist=1372000)
12	60919800	60920600	Colon	EnhPois	Enhancers	ERV2-1C-LTR_BT	LTR-ERVK	intergenic	gene-SLITRK6(dist=217608),gene-SLITRK5(dist=1372000)
13	3167000	3168000	Lung	EnhPois	Enhancers	BTLTR1C	LTR-ERVK	intergenic	gene-PAK5(dist=178085),gene-ANKEF1(dist=84145)
13	10340600	10341200	Cecum	EnhPois	Enhancers	BTLTR1	LTR-ERVK	intronic	gene-KIF16B
13	12545200	12545600	Ileum	EnhPois	Enhancers	BTLTR1	LTR-ERVK	intergenic	gene-ECHDC3(dist=11681),gene-USP6NL(dist=22464)
13	31879600	31879800	Cecum	EnhPois	Enhancers	ERV2-2B_BT-I	LTR-ERVK	intronic	gene-ST8SIA6
13	31881800	31882200	Colon	EnhPois	Enhancers	ERV2-2B_BT-LTR	LTR-ERVK	intronic	gene-ST8SIA6
13	31881800	31882400	Cecum	EnhPois	Enhancers	ERV2-2B_BT-LTR	LTR-ERVK	intronic	gene-ST8SIA6
13	32220000	32221600	Duodenum	EnhPois	Enhancers	BTLTR1B	LTR-ERVK	intronic	gene-TMEM236
13	32220400	32221400	Jejunum	EnhPois	Enhancers	BTLTR1B	LTR-ERVK	intronic	gene-TMEM236
13	37829800	37830200	Abomasum	EnhPois	Enhancers	BTLTR1F	LTR-ERVK	intergenic	gene-LOC515755(dist=40531),gene-LOC112449281(dist=25772)
13	38538200	38538800	Lung	EnhPois	Enhancers	ERV2-2B_BT-LTR	LTR-ERVK	intronic	gene-POLR3F
13	43390600	43390800	Duodenum	EnhPois	Enhancers	BTLTR1B1	LTR-ERVK	intronic	gene-LOC782061
13	43390600	43391600	Jejunum	EnhPois	Enhancers	BTLTR1B1	LTR-ERVK	intronic	gene-LOC782061
13	43391600	43391800	Rumen	EnhPois	Enhancers	BTLTR1B1	LTR-ERVK	intronic	gene-LOC782061
13	43635800	43636200	Liver	EnhPois	Enhancers	ERV2-2B_BT-LTR	LTR-ERVK	intergenic	gene-AKR1C4(dist=8969),gene-LOC527068(dist=6975)
13	43635800	43636600	Lung	EnhPois	Enhancers	ERV2-2B_BT-I	LTR-ERVK	intergenic	gene-AKR1C4(dist=8969),gene-LOC527068(dist=6575)
13	43636000	43636200	Ileum	EnhPois	Enhancers	ERV2-2B_BT-LTR	LTR-ERVK	intergenic	gene-AKR1C4(dist=9169),gene-LOC527068(dist=6975)
13	43636000	43636400	Cecum	EnhPois	Enhancers	ERV2-2B_BT-I	LTR-ERVK	intergenic	gene-AKR1C4(dist=9169),gene-LOC527068(dist=6775)
13	43636000	43636400	Colon	EnhPois	Enhancers	ERV2-2B_BT-I	LTR-ERVK	intergenic	gene-AKR1C4(dist=9169),gene-LOC527068(dist=6775)
13	43636000	43636600	Jejunum	EnhPois	Enhancers	ERV2-2B_BT-I	LTR-ERVK	intergenic	gene-AKR1C4(dist=9169),gene-LOC527068(dist=6575)
13	43639200	43639800	Jejunum	EnhPois	Enhancers	ERV2-2B_BT-I	LTR-ERVK	intergenic	gene-AKR1C4(dist=12369),gene-LOC527068(dist=3375)
13	43639600	43640000	Cecum	EnhPois	Enhancers	ERV2-2B_BT-I	LTR-ERVK	intergenic	gene-AKR1C4(dist=12769),gene-LOC527068(dist=3175)
13	59910600	59911200	Liver	EnhPois	Enhancers	LTR46_BT	LTR-ERVK	UTR5	gene-RAD21L1
13	59918000	59918600	Cecum	EnhPois	Enhancers	LTR46_BT	LTR-ERVK	UTR5	gene-RAD21L1
13	59918000	59918600	Colon	EnhPois	Enhancers	LTR46_BT	LTR-ERVK	UTR5	gene-RAD21L1
13	59918200	59918400	Duodenum	EnhPois	Enhancers	LTR46_BT	LTR-ERVK	UTR5	gene-RAD21L1
13	72927200	72927400	Colon	EnhPois	Enhancers	ERV2-1B-LTR_BT	LTR-ERVK	intronic	gene-SERINC3
13	72927200	72927400	Duodenum	EnhPois	Enhancers	ERV2-1B-LTR_BT	LTR-ERVK	intronic	gene-SERINC3
13	72928000	72928200	Colon	EnhPois	Enhancers	ERV2-1B-LTR_BT	LTR-ERVK	intronic	gene-SERINC3
13	72928000	72928200	Jejunum	EnhPois	Enhancers	ERV2-1B-LTR_BT	LTR-ERVK	intronic	gene-SERINC3
13	72928000	72928400	Duodenum	EnhPois	Enhancers	ERV2-1B-LTR_BT	LTR-ERVK	intronic	gene-SERINC3
13	81521800	81523400	Abomasum	EnhPois	Enhancers	BTLTR1B	LTR-ERVK	intergenic	gene-BCAS1(dist=30918),gene-CYP24A1(dist=68781)
14	520200	520400	Ileum	EnhPois	Enhancers	LTR2C_BT	LTR-ERVK	intergenic	gene-VPS28(dist=7392),gene-SLC39A4(dist=13517)
14	520200	520400	Liver	EnhPois	Enhancers	LTR2C_BT	LTR-ERVK	intergenic	gene-VPS28(dist=7392),gene-SLC39A4(dist=13517)
14	526600	528000	Ileum	EnhPois	Enhancers	ERV2-1-I_BT	LTR-ERVK	intergenic	gene-VPS28(dist=13792),gene-SLC39A4(dist=5917)
14	530400	530600	Liver	EnhPois	Enhancers	ERV2-1-I_BT	LTR-ERVK	intergenic	gene-VPS28(dist=17592),gene-SLC39A4(dist=3317)
14	530400	531000	Jejunum	EnhPois	Enhancers	ERV2-1-I_BT	LTR-ERVK	intergenic	gene-VPS28(dist=17592),gene-SLC39A4(dist=2917)
14	530600	532400	Cecum	EnhPois	Enhancers	ERV2-1-I_BT	LTR-ERVK	intergenic	gene-VPS28(dist=17792),gene-SLC39A4(dist=1517)
14	530800	531200	Ileum	EnhPois	Enhancers	ERV2-1-I_BT	LTR-ERVK	intergenic	gene-VPS28(dist=17992),gene-SLC39A4(dist=2717)
14	530800	531800	Duodenum	EnhPois	Enhancers	ERV2-1-I_BT	LTR-ERVK	intergenic	gene-VPS28(dist=17992),gene-SLC39A4(dist=2117)
14	531200	532000	Abomasum	EnhPois	Enhancers	ERV2-1-I_BT	LTR-ERVK	intergenic	gene-VPS28(dist=18392),gene-SLC39A4(dist=1917)
14	531400	532000	Ileum	EnhPois	Enhancers	ERV2-1-I_BT	LTR-ERVK	intergenic	gene-VPS28(dist=18592),gene-SLC39A4(dist=1917)
14	531600	531800	Colon	EnhPois	Enhancers	ERV2-1-I_BT	LTR-ERVK	intergenic	gene-VPS28(dist=18792),gene-SLC39A4(dist=2117)
14	532400	533600	Ileum	EnhPois	Enhancers	LTR2C_BT	LTR-ERVK	upstream	gene-SLC39A4
14	532600	533600	Cecum	EnhPois	Enhancers	LTR2C_BT	LTR-ERVK	upstream	gene-SLC39A4
14	533000	533600	Colon	EnhPois	Enhancers	LTR2C_BT	LTR-ERVK	upstream	gene-SLC39A4
14	533400	533600	Abomasum	EnhPois	Enhancers	LTR2C_BT	LTR-ERVK	upstream	gene-SLC39A4
14	58445000	58445200	Colon	EnhPois	Enhancers	BTLTR1	LTR-ERVK	intergenic	gene-OXR1(dist=51276),gene-ZFPM2(dist=373714)
14	60285200	60285400	Rumen	EnhPois	Enhancers	BTLTR1B1	LTR-ERVK	upstream	gene-DCSTAMP
14	77186200	77186400	Lung	EnhPois	Enhancers	BTLTR1	LTR-ERVK	intergenic	gene-CA1(dist=31550),gene-LOC784254(dist=7606)
15	881000	881200	Cecum	EnhPois	Enhancers	BTLTR1F	LTR-ERVK	intergenic	gene-LOC532486(dist=115654),gene-LOC515790(dist=2112)
15	881200	881800	Abomasum	EnhPois	Enhancers	BTLTR1F	LTR-ERVK	intergenic	gene-LOC532486(dist=115854),gene-LOC515790(dist=1512)
15	3211400	3213200	Duodenum	EnhPois	Enhancers	BTLTR1C	LTR-ERVK	intergenic	gene-GRIA4(dist=714072),gene-CASP1(dist=19747)
15	3212200	3213200	Cecum	EnhPois	Enhancers	BTLTR1C	LTR-ERVK	intergenic	gene-GRIA4(dist=714872),gene-CASP1(dist=19747)
15	3212200	3213400	Colon	EnhPois	Enhancers	BTLTR1C	LTR-ERVK	intergenic	gene-GRIA4(dist=714872),gene-CASP1(dist=19547)
15	3212400	3213200	Jejunum	EnhPois	Enhancers	BTLTR1C	LTR-ERVK	intergenic	gene-GRIA4(dist=715072),gene-CASP1(dist=19747)
15	3213000	3213200	Ileum	EnhPois	Enhancers	BTLTR1C	LTR-ERVK	intergenic	gene-GRIA4(dist=715672),gene-CASP1(dist=19747)
15	16416800	16417600	Lung	EnhPois	Enhancers	ERV2-1C-LTR_BT	LTR-ERVK	intronic	gene-GUCY1A2
15	17688200	17688600	Liver	EnhPois	Enhancers	LTR46_BT	LTR-ERVK	intronic	gene-CUL5
15	22513800	22514000	Cecum	EnhPois	Enhancers	BTLTR1B	LTR-ERVK	intronic	gene-BCO2
15	22513800	22515000	Jejunum	EnhPois	Enhancers	BTLTR1B	LTR-ERVK	intronic	gene-BCO2
15	28997000	28997400	Jejunum	EnhPois	Enhancers	LTR3_BT	LTR-ERVK	intergenic	gene-MPZL2(dist=43556),gene-CD3E(dist=7153)
15	28997000	28998000	Spleen	EnhPois	Enhancers	LTR3_BT	LTR-ERVK	intergenic	gene-MPZL2(dist=43556),gene-CD3E(dist=6553)
15	42104400	42105600	Lung	EnhPois	Enhancers	ERV2-1B-LTR_BT	LTR-ERVK	intronic	gene-LYVE1
15	42104400	42106600	Liver	EnhPois	Enhancers	ERV2-1B-LTR_BT	LTR-ERVK	intronic	gene-LYVE1
15	46560200	46562000	Lung	EnhPois	Enhancers	ERV2-1B-LTR_BT	LTR-ERVK	intergenic	gene-DNHD1(dist=8237),gene-TIMM10B(dist=3730)
15	46561800	46562200	Abomasum	EnhPois	Enhancers	ERV2-1B-LTR_BT	LTR-ERVK	intergenic	gene-DNHD1(dist=9837),gene-TIMM10B(dist=3530)
15	50374400	50374800	Lung	EnhPois	Enhancers	BTLTR1F	LTR-ERVK	intergenic	gene-LOC526621(dist=4093),gene-LOC112441493(dist=6068)
15	50614000	50614800	Cecum	EnhPois	Enhancers	ERV2-1C-LTR_BT	LTR-ERVK	intergenic	gene-LOC521676(dist=14191),gene-LOC618075(dist=4747)
15	51405200	51406200	Duodenum	EnhPois	Enhancers	ERV2-1C-LTR_BT	LTR-ERVK	intronic	gene-LOC100336836
15	51405400	51405600	Lung	EnhPois	Enhancers	ERV2-1C-LTR_BT	LTR-ERVK	intronic	gene-LOC100336836
15	51405400	51405800	Ileum	EnhPois	Enhancers	ERV2-1C-LTR_BT	LTR-ERVK	intronic	gene-LOC100336836
15	51405400	51406800	Abomasum	EnhPois	Enhancers	ERV2-1C-LTR_BT	LTR-ERVK	exonic	gene-LOC100336836
15	56136000	56137000	Jejunum	EnhPois	Enhancers	BTLTR1	LTR-ERVK	intergenic	gene-LOC112441534(dist=35255),gene-TSKU(dist=42563)
15	56436600	56437000	Duodenum	EnhPois	Enhancers	ERV2-2B_BT-I	LTR-ERVK	intronic	gene-B3GNT6
15	56436600	56437200	Cecum	EnhPois	Enhancers	ERV2-2B_BT-I	LTR-ERVK	intronic	gene-B3GNT6
15	56436600	56437200	Jejunum	EnhPois	Enhancers	ERV2-2B_BT-I	LTR-ERVK	intronic	gene-B3GNT6
15	56440600	56441000	Jejunum	EnhPois	Enhancers	ERV2-2B_BT-I	LTR-ERVK	intronic	gene-B3GNT6
15	56441200	56442800	Jejunum	EnhPois	Enhancers	ERV2-2B_BT-I	LTR-ERVK	intronic	gene-B3GNT6
15	57410600	57411200	Jejunum	EnhPois	Enhancers	LTR2_BT	LTR-ERVK	intronic	gene-SLC5A12
15	57411400	57411600	Jejunum	EnhPois	Enhancers	LTR2_BT	LTR-ERVK	intronic	gene-SLC5A12
15	57693600	57693800	Lung	EnhPois	Enhancers	ERV2-2B_BT-I	LTR-ERVK	intergenic	gene-SLC5A12(dist=277612),gene-FIBIN(dist=10071)
15	57767800	57769000	Jejunum	EnhPois	Enhancers	BTLTR1D2	LTR-ERVK	intronic	gene-BBOX1
15	61061800	61062000	Lung	EnhPois	Enhancers	LTR2B_BT	LTR-ERVK	downstream	gene-ARL14EP
15	61061800	61062000	Rumen	EnhPois	Enhancers	LTR2B_BT	LTR-ERVK	downstream	gene-ARL14EP
15	62886400	62886600	Jejunum	EnhPois	Enhancers	BTLTR1	LTR-ERVK	intronic	gene-LOC614914
15	69369000	69370000	Jejunum	EnhPois	Enhancers	BTLTR1B1	LTR-ERVK	intergenic	NONE(dist=NONE),gene-LRRC4C(dist=1027930)
15	69858400	69858600	Abomasum	EnhPois	Enhancers	ERV2-1-LTR_BT	LTR-ERVK	intergenic	NONE(dist=NONE),gene-LRRC4C(dist=539330)
15	80604600	80605000	Rumen	EnhPois	Enhancers	BTLTR1B1	LTR-ERVK	intergenic	gene-LOC781990(dist=3413),gene-PRG3-2(dist=12024)
15	82244800	82245000	Lung	EnhPois	Enhancers	BTLTR1B	LTR-ERVK	intronic	gene-FAM111B
15	84212400	84213200	Colon	EnhPois	Enhancers	ERV2-1C-LTR_BT	LTR-ERVK	intergenic	gene-OR4A15(dist=55832),gene-LOC104970693(dist=3260)
15	84212400	84213400	Cecum	EnhPois	Enhancers	ERV2-1C-LTR_BT	LTR-ERVK	intergenic	gene-OR4A15(dist=55832),gene-LOC104970693(dist=3060)
15	84212600	84213400	Abomasum	EnhPois	Enhancers	ERV2-1C-LTR_BT	LTR-ERVK	intergenic	gene-OR4A15(dist=56032),gene-LOC104970693(dist=3060)
15	84212600	84213400	Jejunum	EnhPois	Enhancers	ERV2-1C-LTR_BT	LTR-ERVK	intergenic	gene-OR4A15(dist=56032),gene-LOC104970693(dist=3060)
15	84212600	84213400	Lung	EnhPois	Enhancers	ERV2-1C-LTR_BT	LTR-ERVK	intergenic	gene-OR4A15(dist=56032),gene-LOC104970693(dist=3060)
15	84212600	84214600	Duodenum	EnhPois	Enhancers	ERV2-1-I_BT	LTR-ERVK	intergenic	gene-OR4A15(dist=56032),gene-LOC104970693(dist=1860)
15	84213400	84213800	Ileum	EnhPois	Enhancers	ERV2-1-I_BT	LTR-ERVK	intergenic	gene-OR4A15(dist=56832),gene-LOC104970693(dist=2660)
15	84213800	84217400	Cecum	EnhPois	Enhancers	ERV2-1-I_BT	LTR-ERVK	exonic	gene-LOC104970693
15	84214000	84214200	Ileum	EnhPois	Enhancers	ERV2-1-I_BT	LTR-ERVK	intergenic	gene-OR4A15(dist=57432),gene-LOC104970693(dist=2260)
15	84214000	84214800	Abomasum	EnhPois	Enhancers	ERV2-1-I_BT	LTR-ERVK	intergenic	gene-OR4A15(dist=57432),gene-LOC104970693(dist=1660)
15	84214000	84214800	Jejunum	EnhPois	Enhancers	ERV2-1-I_BT	LTR-ERVK	intergenic	gene-OR4A15(dist=57432),gene-LOC104970693(dist=1660)
15	84214200	84214600	Colon	EnhPois	Enhancers	ERV2-1-I_BT	LTR-ERVK	intergenic	gene-OR4A15(dist=57632),gene-LOC104970693(dist=1860)
15	84214200	84216200	Lung	EnhPois	Enhancers	ERV2-1-I_BT	LTR-ERVK	downstream	gene-LOC104970693
15	84214800	84217400	Colon	EnhPois	Enhancers	ERV2-1-I_BT	LTR-ERVK	exonic	gene-LOC104970693
15	84216600	84217000	Jejunum	EnhPois	Enhancers	ERV2-1-I_BT	LTR-ERVK	exonic	gene-LOC104970693
15	84217600	84218400	Cecum	EnhPois	Enhancers	ERV2-1-I_BT	LTR-ERVK	upstream	gene-LOC104970693
15	84219800	84221200	Jejunum	EnhPois	Enhancers	ERV2-1C-LTR_BT	LTR-ERVK	intergenic	gene-LOC104970693(dist=2789),gene-OR4C6(dist=10828)
15	84220200	84221200	Cecum	EnhPois	Enhancers	ERV2-1C-LTR_BT	LTR-ERVK	intergenic	gene-LOC104970693(dist=3189),gene-OR4C6(dist=10828)
15	84220200	84221200	Lung	EnhPois	Enhancers	ERV2-1C-LTR_BT	LTR-ERVK	intergenic	gene-LOC104970693(dist=3189),gene-OR4C6(dist=10828)
15	84291000	84291600	Cecum	EnhPois	Enhancers	ERV2-1C-LTR_BT	LTR-ERVK	intergenic	gene-OR4C6(dist=58043),gene-LOC112441559(dist=6725)
16	3754600	3754800	Colon	EnhPois	Enhancers	BTLTR1	LTR-ERVK	intronic	gene-RAB7B
16	5116800	5117000	Lung	EnhPois	Enhancers	BTLTR1B1	LTR-ERVK	intergenic	gene-LOC510860(dist=18090),gene-LOC515150(dist=25271)
16	16606200	16606400	Duodenum	EnhPois	Enhancers	LTR46_BT	LTR-ERVK	intergenic	gene-BRINP3(dist=975061),gene-LOC529930(dist=994595)
16	23564400	23565000	Jejunum	EnhPois	Enhancers	ERV2-1C-LTR_BT	LTR-ERVK	intronic	gene-BPNT1
16	23564600	23565600	Cecum	EnhPois	Enhancers	ERV2-1C-LTR_BT	LTR-ERVK	intronic	gene-BPNT1
16	23564600	23565600	Lung	EnhPois	Enhancers	ERV2-1C-LTR_BT	LTR-ERVK	intronic	gene-BPNT1
16	23564800	23565600	Colon	EnhPois	Enhancers	ERV2-1C-LTR_BT	LTR-ERVK	intronic	gene-BPNT1
16	23565000	23565400	Abomasum	EnhPois	Enhancers	ERV2-1C-LTR_BT	LTR-ERVK	intronic	gene-BPNT1
16	23565200	23565800	Jejunum	EnhPois	Enhancers	ERV2-1C-LTR_BT	LTR-ERVK	intronic	gene-BPNT1
16	24229800	24231000	Lung	EnhPois	Enhancers	BTLTR1C	LTR-ERVK	intronic	gene-MARC2
16	24230000	24231400	Cecum	EnhPois	Enhancers	BTLTR1C	LTR-ERVK	intronic	gene-MARC2
16	24230800	24231200	Liver	EnhPois	Enhancers	BTLTR1C	LTR-ERVK	intronic	gene-MARC2
16	29467800	29469200	Jejunum	EnhPois	Enhancers	ERV2-1C-LTR_BT	LTR-ERVK	intergenic	gene-PARP1(dist=61344),gene-STUM(dist=80770)
16	29467800	29469400	Lung	EnhPois	Enhancers	ERV2-1C-LTR_BT	LTR-ERVK	intergenic	gene-PARP1(dist=61344),gene-STUM(dist=80570)
16	36398400	36399600	Duodenum	EnhPois	Enhancers	ERV2-2-I_BT	LTR-ERVK	intergenic	gene-DPT(dist=64583),gene-TRNAC-ACA-74(dist=25723)
16	36400000	36400200	Lung	EnhPois	Enhancers	ERV2-3-I_BT	LTR-ERVK	intergenic	gene-DPT(dist=66183),gene-TRNAC-ACA-74(dist=25123)
16	37287400	37287800	Abomasum	EnhPois	Enhancers	BTLTR1F	LTR-ERVK	intergenic	gene-SELP(dist=2350),gene-SELL(dist=52328)
16	38854000	38854200	Liver	EnhPois	Enhancers	LTR3_BT	LTR-ERVK	intergenic	gene-FMO1(dist=4925),gene-FMO4(dist=10958)
16	38867400	38869000	Jejunum	EnhPois	Enhancers	ERV2-1B-LTR_BT	LTR-ERVK	intronic	gene-FMO4
16	38867800	38868200	Lung	EnhPois	Enhancers	ERV2-1B-LTR_BT	LTR-ERVK	intronic	gene-FMO4
16	41618600	41620200	Ileum	EnhPois	Enhancers	LTR2_BT	LTR-ERVK	intronic	gene-TNFRSF8
16	43174000	43174200	Duodenum	EnhPois	Enhancers	BTLTR1B1	LTR-ERVK	upstream	gene-PGD
16	43174800	43175000	Jejunum	EnhPois	Enhancers	BTLTR1B1	LTR-ERVK	intergenic	gene-PGD(dist=1484),gene-TRNAR-CCG-2(dist=3223)
16	43174800	43175200	Duodenum	EnhPois	Enhancers	BTLTR1B1	LTR-ERVK	intergenic	gene-PGD(dist=1484),gene-TRNAR-CCG-2(dist=3023)
16	48255800	48256000	Jejunum	EnhPois	Enhancers	BTLTR1	LTR-ERVK	intergenic	gene-NPHP4(dist=791895),gene-AJAP1(dist=316098)
16	54903800	54904000	Lung	EnhPois	Enhancers	ERV2-3-I_BT	LTR-ERVK	intronic	gene-AADACL3
16	55934800	55936600	Jejunum	EnhPois	Enhancers	BTLTR1B1	LTR-ERVK	intergenic	gene-GPR52(dist=183140),gene-RABGAP1L-2(dist=124573)
16	57990400	57990600	Colon	EnhPois	Enhancers	BTLTR1B	LTR-ERVK	intronic	gene-PAPPA2
16	57991400	57991600	Lung	EnhPois	Enhancers	BTLTR1B	LTR-ERVK	intronic	gene-PAPPA2
16	63153800	63154000	Jejunum	EnhPois	Enhancers	BTLTR1	LTR-ERVK	intergenic	gene-CACNA1E(dist=204206),gene-ZNF648(dist=15574)
16	65903800	65904800	Colon	EnhPois	Enhancers	BTLTR1C	LTR-ERVK	intronic	gene-FAM129A
16	70732200	70732600	Lung	EnhPois	Enhancers	BTLTR1C	LTR-ERVK	intronic	gene-SPATA45
16	70732800	70733400	Lung	EnhPois	Enhancers	BTLTR1C	LTR-ERVK	intronic	gene-SPATA45
16	75622000	75624000	Jejunum	EnhPois	Enhancers	ERV2-1B-LTR_BT	LTR-ERVK	upstream	gene-CD46
16	75622600	75624200	Lung	EnhPois	Enhancers	ERV2-1B-LTR_BT	LTR-ERVK	intergenic	gene-CD46(dist=1445),gene-MIR29E(dist=36173)
17	3867800	3869200	Cecum	EnhPois	Enhancers	ERV2-1C-LTR_BT	LTR-ERVK	intergenic	gene-SFRP2(dist=24758),gene-RNF175(dist=15493)
17	16973000	16973200	Colon	EnhPois	Enhancers	BTLTR1F	LTR-ERVK	intergenic	gene-RNF150(dist=53682),gene-TBC1D9(dist=40935)
17	16973000	16973200	Duodenum	EnhPois	Enhancers	BTLTR1F	LTR-ERVK	intergenic	gene-RNF150(dist=53682),gene-TBC1D9(dist=40935)
17	16973000	16974200	Ileum	EnhPois	Enhancers	BTLTR1F	LTR-ERVK	intergenic	gene-RNF150(dist=53682),gene-TBC1D9(dist=39935)
17	16973000	16974400	Jejunum	EnhPois	Enhancers	BTLTR1F	LTR-ERVK	intergenic	gene-RNF150(dist=53682),gene-TBC1D9(dist=39735)
17	36052000	36052200	Ileum	EnhPois	Enhancers	LTR2_BT	LTR-ERVK	intergenic	gene-TRPC3(dist=250830),gene-FSTL5(dist=208631)
17	51026600	51026800	Jejunum	EnhPois	Enhancers	BTLTR1B1	LTR-ERVK	intergenic	gene-SCARB1(dist=4135),gene-NCOR2(dist=196843)
17	62283400	62284400	Jejunum	EnhPois	Enhancers	ERV2-1B-LTR_BT	LTR-ERVK	intronic	gene-MAPKAPK5
17	62283400	62284800	Duodenum	EnhPois	Enhancers	ERV2-1B-LTR_BT	LTR-ERVK	intronic	gene-MAPKAPK5
17	62283800	62284000	Lung	EnhPois	Enhancers	ERV2-1B-LTR_BT	LTR-ERVK	intronic	gene-MAPKAPK5
17	62284600	62285600	Jejunum	EnhPois	Enhancers	ERV2-1B-LTR_BT	LTR-ERVK	intronic	gene-MAPKAPK5
17	67339600	67340600	Cecum	EnhPois	Enhancers	BTLTR1B1	LTR-ERVK	intronic	gene-LOC101903015
17	67339800	67340000	Jejunum	EnhPois	Enhancers	BTLTR1B1	LTR-ERVK	intronic	gene-LOC101903015
17	67364400	67364800	Colon	EnhPois	Enhancers	BTLTR1C	LTR-ERVK	UTR3	gene-LOC101903015
17	70944200	70944600	Ileum	EnhPois	Enhancers	BTLTR1	LTR-ERVK	intronic	gene-IGLL1,gene-LOC112442070
17	70945000	70945800	Ileum	EnhPois	Enhancers	BTLTR1	LTR-ERVK	intronic	gene-IGLL1,gene-LOC112442070
17	70960000	70960200	Ileum	EnhPois	Enhancers	ERV2-1-I_BT	LTR-ERVK	intronic	gene-IGLL1
18	1885000	1886200	Duodenum	EnhPois	Enhancers	BTLTR1E	LTR-ERVK	intronic	gene-PDPR
18	1885000	1886200	Lung	EnhPois	Enhancers	BTLTR1E	LTR-ERVK	intronic	gene-PDPR
18	1885400	1886200	Liver	EnhPois	Enhancers	BTLTR1E	LTR-ERVK	intronic	gene-PDPR
18	1885800	1886000	Abomasum	EnhPois	Enhancers	BTLTR1E	LTR-ERVK	intronic	gene-PDPR
18	7891800	7892000	Jejunum	EnhPois	Enhancers	BTLTR1	LTR-ERVK	intergenic	gene-PKD1L2(dist=8359),gene-BCO1(dist=5582)
18	34753400	34753800	Jejunum	EnhPois	Enhancers	BTLTR1F	LTR-ERVK	downstream	gene-CBFB
18	34754000	34754200	Jejunum	EnhPois	Enhancers	BTLTR1F	LTR-ERVK	downstream	gene-CBFB
18	36842800	36843000	Abomasum	EnhPois	Enhancers	ERV2-1B-LTR_BT	LTR-ERVK	intronic	gene-WWP2
18	48536200	48536400	Jejunum	EnhPois	Enhancers	LTR3_BT	LTR-ERVK	downstream	gene-LGALS4
18	48536600	48536800	Jejunum	EnhPois	Enhancers	LTR3_BT	LTR-ERVK	downstream	gene-LGALS4
18	49289000	49289200	Cecum	EnhPois	Enhancers	BTLTR1C	LTR-ERVK	intronic	gene-LOC515276
18	49289600	49289800	Cecum	EnhPois	Enhancers	BTLTR1C	LTR-ERVK	intronic	gene-LOC515276
18	49460600	49461000	Abomasum	EnhPois	Enhancers	BTLTR1E1	LTR-ERVK	intronic	gene-FCGBP
18	50329200	50330600	Lung	EnhPois	Enhancers	ERV2-1B-LTR_BT	LTR-ERVK	intergenic	gene-CYP2B6(dist=21167),gene-CYP2S1(dist=48991)
18	51519800	51520200	Duodenum	EnhPois	Enhancers	BTLTR1	LTR-ERVK	intergenic	gene-CXCL17(dist=12933),gene-CD177(dist=24065)
18	51519800	51520200	Ileum	EnhPois	Enhancers	BTLTR1	LTR-ERVK	intergenic	gene-CXCL17(dist=12933),gene-CD177(dist=24065)
18	51519800	51520800	Colon	EnhPois	Enhancers	BTLTR1	LTR-ERVK	intergenic	gene-CXCL17(dist=12933),gene-CD177(dist=23465)
18	51519800	51521000	Cecum	EnhPois	Enhancers	BTLTR1	LTR-ERVK	intergenic	gene-CXCL17(dist=12933),gene-CD177(dist=23265)
18	52863000	52864400	Liver	EnhPois	Enhancers	BTLTR1C	LTR-ERVK	intergenic	gene-BLOC1S3(dist=29043),gene-LOC508455(dist=1917)
18	54743200	54744200	Duodenum	EnhPois	Enhancers	BTLTR1F	LTR-ERVK	intronic	gene-SULT2A1
18	54743600	54744200	Ileum	EnhPois	Enhancers	BTLTR1F	LTR-ERVK	intronic	gene-SULT2A1
18	54743800	54744600	Liver	EnhPois	Enhancers	BTLTR1F	LTR-ERVK	intronic	gene-SULT2A1
18	54744400	54744800	Duodenum	EnhPois	Enhancers	BTLTR1F	LTR-ERVK	intronic	gene-SULT2A1
18	54744600	54744800	Cecum	EnhPois	Enhancers	BTLTR1F	LTR-ERVK	intronic	gene-SULT2A1
18	54744600	54744800	Ileum	EnhPois	Enhancers	BTLTR1F	LTR-ERVK	intronic	gene-SULT2A1
18	54746800	54747200	Colon	EnhPois	Enhancers	ERV2-1-I_BT	LTR-ERVK	intronic	gene-SULT2A1
18	54747000	54748200	Jejunum	EnhPois	Enhancers	ERV2-1-I_BT	LTR-ERVK	intronic	gene-SULT2A1
18	54747200	54748200	Duodenum	EnhPois	Enhancers	ERV2-1-I_BT	LTR-ERVK	intronic	gene-SULT2A1
18	54747400	54747800	Spleen	EnhPois	Enhancers	ERV2-1-I_BT	LTR-ERVK	intronic	gene-SULT2A1
18	54747600	54748200	Ileum	EnhPois	Enhancers	BTLTR1F	LTR-ERVK	intronic	gene-SULT2A1
18	54748400	54749200	Jejunum	EnhPois	Enhancers	BTLTR1F	LTR-ERVK	exonic	gene-SULT2A1
18	54748600	54749400	Ileum	EnhPois	Enhancers	BTLTR1F	LTR-ERVK	exonic	gene-SULT2A1
18	59506000	59506200	Colon	EnhPois	Enhancers	ERV2-1C-LTR_BT	LTR-ERVK	intronic	gene-LOC100299712
18	59506400	59507600	Colon	EnhPois	Enhancers	BTLTR1F	LTR-ERVK	intronic	gene-LOC100299712
18	59507000	59507800	Cecum	EnhPois	Enhancers	BTLTR1F	LTR-ERVK	intronic	gene-LOC100299712
18	59508000	59508400	Colon	EnhPois	Enhancers	ERV2-1C-LTR_BT	LTR-ERVK	intronic	gene-LOC100299712
18	59508000	59508800	Cecum	EnhPois	Enhancers	ERV2-1C-LTR_BT	LTR-ERVK	intronic	gene-LOC100299712
18	59508400	59509000	Ileum	EnhPois	Enhancers	ERV2-1-I_BT	LTR-ERVK	intronic	gene-LOC100299712
18	59509200	59509600	Cecum	EnhPois	Enhancers	ERV2-1-I_BT	LTR-ERVK	intronic	gene-LOC100299712
18	59509200	59509600	Colon	EnhPois	Enhancers	ERV2-1-I_BT	LTR-ERVK	intronic	gene-LOC100299712
18	59509200	59509600	Jejunum	EnhPois	Enhancers	ERV2-1-I_BT	LTR-ERVK	intronic	gene-LOC100299712
18	59515600	59516000	Colon	EnhPois	Enhancers	ERV2-1-I_BT	LTR-ERVK	intronic	gene-LOC100299712
18	59516200	59516600	Colon	EnhPois	Enhancers	ERV2-1-I_BT	LTR-ERVK	intronic	gene-LOC100299712
18	59516400	59517600	Cecum	EnhPois	Enhancers	ERV2-1-I_BT	LTR-ERVK	intronic	gene-LOC100299712
18	59517800	59518600	Cecum	EnhPois	Enhancers	ERV2-1-I_BT	LTR-ERVK	intronic	gene-LOC100299712
18	59518000	59518600	Jejunum	EnhPois	Enhancers	ERV2-1-I_BT	LTR-ERVK	intronic	gene-LOC100299712
18	59518400	59518800	Colon	EnhPois	Enhancers	ERV2-1-I_BT	LTR-ERVK	intronic	gene-LOC100299712
18	59599000	59599800	Jejunum	EnhPois	Enhancers	ERV2-1-I_BT	LTR-ERVK	intergenic	gene-LOC100848077(dist=48273),gene-LOC508131(dist=1811)
18	60545800	60546800	Jejunum	EnhPois	Enhancers	ERV2-1C-LTR_BT	LTR-ERVK	intronic	gene-LOC100336208,gene-LOC104968479
18	60546200	60547000	Cecum	EnhPois	Enhancers	ERV2-1C-LTR_BT	LTR-ERVK	intronic	gene-LOC100336208,gene-LOC104968479
18	60546200	60547000	Colon	EnhPois	Enhancers	ERV2-1C-LTR_BT	LTR-ERVK	intronic	gene-LOC100336208,gene-LOC104968479
18	60546400	60547000	Duodenum	EnhPois	Enhancers	ERV2-1C-LTR_BT	LTR-ERVK	intronic	gene-LOC100336208,gene-LOC104968479
18	61245400	61245600	Jejunum	EnhPois	Enhancers	BTLTR1	LTR-ERVK	intronic	gene-LOC528332,gene-MGC138914
18	61964800	61965800	Lung	EnhPois	Enhancers	BTLTR1	LTR-ERVK	intergenic	gene-ZNF579(dist=5739),gene-SBK3(dist=10810)
18	62632400	62633800	Jejunum	EnhPois	Enhancers	BTLTR1B	LTR-ERVK	intronic	gene-KIR3DS1,gene-LOC614781
18	62632600	62632800	Colon	EnhPois	Enhancers	BTLTR1B	LTR-ERVK	intronic	gene-KIR3DS1,gene-LOC614781
18	62632600	62633000	Lung	EnhPois	Enhancers	BTLTR1B	LTR-ERVK	intronic	gene-KIR3DS1,gene-LOC614781
18	62632800	62634200	Cecum	EnhPois	Enhancers	BTLTR1B	LTR-ERVK	intronic	gene-KIR3DS1,gene-LOC614781
18	65076400	65076800	Colon	EnhPois	Enhancers	LTR2_BT	LTR-ERVK	intergenic	gene-LOC789996(dist=22494),gene-ZSCAN4(dist=2114)
19	5127000	5128200	Lung	EnhPois	Enhancers	ERV2-1B-LTR_BT	LTR-ERVK	intronic	gene-STXBP4
19	7698200	7698400	Jejunum	EnhPois	Enhancers	BTLTR1	LTR-ERVK	intergenic	gene-DGKE(dist=16998),gene-TRIM25(dist=18595)
19	9608200	9608400	Adipose	EnhPois	Enhancers	ERV2-1-LTR_BT	LTR-ERVK	intronic	gene-TEX14
19	9608200	9608400	Colon	EnhPois	Enhancers	ERV2-1-LTR_BT	LTR-ERVK	intronic	gene-TEX14
19	9608200	9608400	Liver	EnhPois	Enhancers	ERV2-1-LTR_BT	LTR-ERVK	intronic	gene-TEX14
19	9608200	9608600	Cecum	EnhPois	Enhancers	ERV2-1-LTR_BT	LTR-ERVK	intronic	gene-TEX14
19	9608200	9608600	Jejunum	EnhPois	Enhancers	ERV2-1-LTR_BT	LTR-ERVK	intronic	gene-TEX14
19	9608200	9608600	Spleen	EnhPois	Enhancers	ERV2-1-LTR_BT	LTR-ERVK	intronic	gene-TEX14
19	9609200	9609400	Cecum	EnhPois	Enhancers	ERV2-1-LTR_BT	LTR-ERVK	intronic	gene-TEX14
19	9609200	9609400	Spleen	EnhPois	Enhancers	ERV2-1-LTR_BT	LTR-ERVK	intronic	gene-TEX14
19	10348000	10348600	Cecum	EnhPois	Enhancers	BTLTR1B	LTR-ERVK	intronic	gene-YPEL2
19	24931600	24931800	Ileum	EnhPois	Enhancers	BTLTR1B	LTR-ERVK	intergenic	gene-UBE2G1(dist=46820),gene-SPNS2(dist=4760)
19	25262600	25262800	Colon	EnhPois	Enhancers	BTLTR1	LTR-ERVK	intronic	gene-KIAA0753
19	26596200	26598400	Lung	EnhPois	Enhancers	ERV2-1B-LTR_BT	LTR-ERVK	intergenic	gene-TM4SF5(dist=12979),gene-ZMYND15(dist=11142)
19	33943000	33943400	Liver	EnhPois	Enhancers	ERV2-1-LTR_BT	LTR-ERVK	intergenic	gene-ALDH3A2(dist=7110),gene-SLC47A1(dist=43029)
19	33944000	33944200	Liver	EnhPois	Enhancers	ERV2-1-LTR_BT	LTR-ERVK	intergenic	gene-ALDH3A2(dist=8110),gene-SLC47A1(dist=42229)
19	33958000	33958400	Liver	EnhPois	Enhancers	ERV2-1-LTR_BT	LTR-ERVK	intergenic	gene-ALDH3A2(dist=22110),gene-SLC47A1(dist=28029)
19	33959000	33959400	Liver	EnhPois	Enhancers	ERV2-1-LTR_BT	LTR-ERVK	intergenic	gene-ALDH3A2(dist=23110),gene-SLC47A1(dist=27029)
19	33959200	33959400	Jejunum	EnhPois	Enhancers	ERV2-1-LTR_BT	LTR-ERVK	intergenic	gene-ALDH3A2(dist=23310),gene-SLC47A1(dist=27029)
19	43326600	43329000	Lung	EnhPois	Enhancers	BTLTR1C	LTR-ERVK	intergenic	gene-LOC100335845(dist=143289),gene-ARL4D(dist=5270)
19	43753000	43754200	Adipose	EnhPois	Enhancers	LTR2C_BT	LTR-ERVK	intergenic	gene-CD300LG(dist=7485),gene-MPP2(dist=9659)
19	52244600	52245400	Liver	EnhPois	Enhancers	LTR2_BT	LTR-ERVK	intergenic	gene-LOC509283(dist=2389),gene-LOC512869(dist=15816)
19	53412000	53412200	Colon	EnhPois	Enhancers	LTR46_BT	LTR-ERVK	intergenic	gene-CANT1(dist=4174),gene-LGALS3BP(dist=4467)
19	53412000	53412200	Ileum	EnhPois	Enhancers	LTR46_BT	LTR-ERVK	intergenic	gene-CANT1(dist=4174),gene-LGALS3BP(dist=4467)
19	55734800	55735000	Rumen	EnhPois	Enhancers	ERV2-1B-LTR_BT	LTR-ERVK	intergenic	gene-TRIM65(dist=2239),gene-TRIM47(dist=6288)
19	63355800	63356000	Jejunum	EnhPois	Enhancers	ERV2-1-LTR_BT	LTR-ERVK	intergenic	gene-HELZ(dist=62843),gene-LOC112442745(dist=82798)
2	673400	673600	Colon	EnhPois	Enhancers	BTLTR1	LTR-ERVK	intronic	gene-OCA2
2	2211200	2212200	Cecum	EnhPois	Enhancers	ERV2-1C-LTR_BT	LTR-ERVK	intergenic	gene-PLEKHB2(dist=241404),gene-HS6ST1(dist=1975187)
2	2213200	2214200	Cecum	EnhPois	Enhancers	ERV2-1-I_BT	LTR-ERVK	intergenic	gene-PLEKHB2(dist=243404),gene-HS6ST1(dist=1973187)
2	2213400	2214200	Colon	EnhPois	Enhancers	ERV2-1-I_BT	LTR-ERVK	intergenic	gene-PLEKHB2(dist=243604),gene-HS6ST1(dist=1973187)
2	2214600	2215400	Colon	EnhPois	Enhancers	ERV2-1-I_BT	LTR-ERVK	intergenic	gene-PLEKHB2(dist=244804),gene-HS6ST1(dist=1971987)
2	2214800	2215600	Cecum	EnhPois	Enhancers	ERV2-1-I_BT	LTR-ERVK	intergenic	gene-PLEKHB2(dist=245004),gene-HS6ST1(dist=1971787)
2	2215800	2216400	Colon	EnhPois	Enhancers	ERV2-1-I_BT	LTR-ERVK	intergenic	gene-PLEKHB2(dist=246004),gene-HS6ST1(dist=1970987)
2	2215800	2216800	Cecum	EnhPois	Enhancers	ERV2-1-I_BT	LTR-ERVK	intergenic	gene-PLEKHB2(dist=246004),gene-HS6ST1(dist=1970587)
2	2220600	2221800	Cecum	EnhPois	Enhancers	ERV2-1-I_BT	LTR-ERVK	intergenic	gene-PLEKHB2(dist=250804),gene-HS6ST1(dist=1965587)
2	2222400	2222600	Colon	EnhPois	Enhancers	ERV2-1-I_BT	LTR-ERVK	intergenic	gene-PLEKHB2(dist=252604),gene-HS6ST1(dist=1964787)
2	4646600	4648200	Cecum	EnhPois	Enhancers	BTLTR1F	LTR-ERVK	intergenic	gene-POLR2D(dist=11434),gene-WDR33(dist=28797)
2	4646800	4647400	Abomasum	EnhPois	Enhancers	BTLTR1F	LTR-ERVK	intergenic	gene-POLR2D(dist=11634),gene-WDR33(dist=29597)
2	4646800	4649200	Duodenum	EnhPois	Enhancers	BTLTR1F	LTR-ERVK	intergenic	gene-POLR2D(dist=11634),gene-WDR33(dist=27797)
2	4647400	4648400	Lung	EnhPois	Enhancers	BTLTR1F	LTR-ERVK	intergenic	gene-POLR2D(dist=12234),gene-WDR33(dist=28597)
2	4647600	4648000	Abomasum	EnhPois	Enhancers	BTLTR1F	LTR-ERVK	intergenic	gene-POLR2D(dist=12434),gene-WDR33(dist=28997)
2	4647600	4648400	Colon	EnhPois	Enhancers	BTLTR1F	LTR-ERVK	intergenic	gene-POLR2D(dist=12434),gene-WDR33(dist=28597)
2	6421000	6421400	Cecum	EnhPois	Enhancers	ERV2-2B_BT-I	LTR-ERVK	intergenic	gene-MSTN(dist=135510),gene-PMS1(dist=38694)
2	6686200	6686800	Abomasum	EnhPois	Enhancers	BTLTR1C	LTR-ERVK	intergenic	gene-ASNSD1(dist=9769),gene-SLC40A1(dist=88191)
2	6686200	6686800	Cecum	EnhPois	Enhancers	BTLTR1C	LTR-ERVK	intergenic	gene-ASNSD1(dist=9769),gene-SLC40A1(dist=88191)
2	6686200	6686800	Colon	EnhPois	Enhancers	BTLTR1C	LTR-ERVK	intergenic	gene-ASNSD1(dist=9769),gene-SLC40A1(dist=88191)
2	6686200	6686800	Duodenum	EnhPois	Enhancers	BTLTR1C	LTR-ERVK	intergenic	gene-ASNSD1(dist=9769),gene-SLC40A1(dist=88191)
2	6687000	6688000	Abomasum	EnhPois	Enhancers	BTLTR1C	LTR-ERVK	intergenic	gene-ASNSD1(dist=10569),gene-SLC40A1(dist=86991)
2	6687000	6688200	Lung	EnhPois	Enhancers	BTLTR1C	LTR-ERVK	intergenic	gene-ASNSD1(dist=10569),gene-SLC40A1(dist=86791)
2	14081600	14082200	Hypothalamus	EnhPois	Enhancers	ERV2-1-I_BT	LTR-ERVK	intronic	gene-PDE1A
2	15840800	15841600	Cortex	EnhPois	Enhancers	BTLTR1J4	LTR-ERVK	intergenic	gene-TRNASTOP-UCA(dist=102313),gene-CWC22(dist=972086)
2	27143200	27144400	Lung	EnhPois	Enhancers	ERV2-1B-LTR_BT	LTR-ERVK	intronic	gene-ABCB11
2	27144400	27144600	Jejunum	EnhPois	Enhancers	ERV2-1B-LTR_BT	LTR-ERVK	intronic	gene-ABCB11
2	50252000	50252800	Cecum	EnhPois	Enhancers	ERV2-1C-LTR_BT	LTR-ERVK	intergenic	gene-LOC786829(dist=620122),gene-LOC101904069(dist=1916831)
2	50252000	50252800	Colon	EnhPois	Enhancers	ERV2-1C-LTR_BT	LTR-ERVK	intergenic	gene-LOC786829(dist=620122),gene-LOC101904069(dist=1916831)
2	59309600	59310400	Colon	EnhPois	Enhancers	ERV2-1B-LTR_BT	LTR-ERVK	intergenic	gene-HNMT(dist=129322),gene-THSD7B(dist=200347)
2	59309600	59310600	Cecum	EnhPois	Enhancers	ERV2-1B-LTR_BT	LTR-ERVK	intergenic	gene-HNMT(dist=129322),gene-THSD7B(dist=200147)
2	59309600	59310600	Jejunum	EnhPois	Enhancers	ERV2-1B-LTR_BT	LTR-ERVK	intergenic	gene-HNMT(dist=129322),gene-THSD7B(dist=200147)
2	59310000	59310200	Duodenum	EnhPois	Enhancers	ERV2-1B-LTR_BT	LTR-ERVK	intergenic	gene-HNMT(dist=129722),gene-THSD7B(dist=200547)
2	59310800	59311000	Jejunum	EnhPois	Enhancers	ERV2-1B-LTR_BT	LTR-ERVK	intergenic	gene-HNMT(dist=130522),gene-THSD7B(dist=199747)
2	59311000	59311200	Duodenum	EnhPois	Enhancers	ERV2-1B-LTR_BT	LTR-ERVK	intergenic	gene-HNMT(dist=130722),gene-THSD7B(dist=199547)
2	59435400	59435800	Abomasum	EnhPois	Enhancers	ERV2-1B-LTR_BT	LTR-ERVK	intergenic	gene-HNMT(dist=255122),gene-THSD7B(dist=74947)
2	62358200	62358600	Ileum	EnhPois	Enhancers	BTLTR1E	LTR-ERVK	intergenic	gene-CCNT2(dist=6216),gene-ACMSD(dist=4599)
2	89226200	89228600	Lung	EnhPois	Enhancers	BTLTR1C	LTR-ERVK	intergenic	gene-AOX1(dist=52286),gene-AOX4(dist=55074)
2	106000000	106000000	Jejunum	EnhPois	Enhancers	ERV2-1-LTR_BT	LTR-ERVK	intronic	gene-PNKD
2	107000000	107000000	Jejunum	EnhPois	Enhancers	BTLTR1	LTR-ERVK	intronic	gene-CYP27A1
2	107000000	107000000	Lung	EnhPois	Enhancers	ERV2-1C-LTR_BT	LTR-ERVK	intronic	gene-CYP27A1
2	107000000	107000000	Duodenum	EnhPois	Enhancers	ERV2-1C-LTR_BT	LTR-ERVK	intronic	gene-CYP27A1
2	107000000	107000000	Abomasum	EnhPois	Enhancers	ERV2-1C-LTR_BT	LTR-ERVK	intronic	gene-CYP27A1
2	107000000	107000000	Lung	EnhPois	Enhancers	ERV2-1C-LTR_BT	LTR-ERVK	intronic	gene-CYP27A1
2	107000000	107000000	Cecum	EnhPois	Enhancers	ERV2-1C-LTR_BT	LTR-ERVK	intronic	gene-CYP27A1
2	113000000	113000000	Colon	EnhPois	Enhancers	BTLTR1B	LTR-ERVK	intergenic	gene-DOCK10(dist=302042),gene-NYAP2(dist=177496)
2	116000000	116000000	Abomasum	EnhPois	Enhancers	ERV2-3-I_BT	LTR-ERVK	intergenic	gene-SLC19A3(dist=7266),gene-CCL20(dist=96795)
2	126000000	126000000	Lung	EnhPois	Enhancers	ERV2-3-I_BT	LTR-ERVK	intronic	gene-WDTC1
2	128000000	128000000	Jejunum	EnhPois	Enhancers	LTR7_BT	LTR-ERVK	intergenic	gene-RCAN3(dist=6606),gene-NIPAL3(dist=7765)
2	129000000	129000000	Colon	EnhPois	Enhancers	BTLTR1B1	LTR-ERVK	intergenic	gene-CNR2(dist=10939),gene-FUCA1(dist=6229)
2	129000000	129000000	Duodenum	EnhPois	Enhancers	BTLTR1B1	LTR-ERVK	intergenic	gene-CNR2(dist=11139),gene-FUCA1(dist=6229)
2	129000000	129000000	Cecum	EnhPois	Enhancers	BTLTR1B1	LTR-ERVK	intergenic	gene-CNR2(dist=11339),gene-FUCA1(dist=6229)
2	129000000	129000000	Jejunum	EnhPois	Enhancers	BTLTR1B1	LTR-ERVK	intergenic	gene-CNR2(dist=11339),gene-FUCA1(dist=6229)
2	130000000	130000000	Duodenum	EnhPois	Enhancers	BTLTR1F	LTR-ERVK	intronic	gene-ZBTB40
2	130000000	130000000	Rumen	EnhPois	Enhancers	BTLTR1F	LTR-ERVK	intronic	gene-ZBTB40
2	130000000	130000000	Duodenum	EnhPois	Enhancers	BTLTR1F	LTR-ERVK	intronic	gene-ZBTB40
2	136000000	136000000	Colon	EnhPois	Enhancers	BTLTR1E1	LTR-ERVK	intergenic	gene-SRARP(dist=49919),gene-LOC788414(dist=66635)
20	395200	396400	Colon	EnhPois	Enhancers	BTLTR1C	LTR-ERVK	intergenic	gene-PANK3(dist=67734),gene-SLIT3(dist=46568)
20	20332200	20332400	Ileum	EnhPois	Enhancers	BTLTR1B	LTR-ERVK	intergenic	gene-PDE4D(dist=14432),gene-RAB3C(dist=101228)
20	31723400	31725200	Hypothalamus	EnhPois	Enhancers	ERV2-1C-LTR_BT	LTR-ERVK	intergenic	gene-ZNF131(dist=142725),gene-SELENOP(dist=36569)
20	31723600	31725200	Cortex	EnhPois	Enhancers	ERV2-1C-LTR_BT	LTR-ERVK	intergenic	gene-ZNF131(dist=142925),gene-SELENOP(dist=36569)
20	31723600	31725600	Duodenum	EnhPois	Enhancers	ERV2-1C-LTR_BT	LTR-ERVK	intergenic	gene-ZNF131(dist=142925),gene-SELENOP(dist=36169)
20	31723800	31724400	Colon	EnhPois	Enhancers	ERV2-1C-LTR_BT	LTR-ERVK	intergenic	gene-ZNF131(dist=143125),gene-SELENOP(dist=37369)
20	31723800	31724600	Cecum	EnhPois	Enhancers	ERV2-1C-LTR_BT	LTR-ERVK	intergenic	gene-ZNF131(dist=143125),gene-SELENOP(dist=37169)
20	31723800	31725000	Jejunum	EnhPois	Enhancers	ERV2-1C-LTR_BT	LTR-ERVK	intergenic	gene-ZNF131(dist=143125),gene-SELENOP(dist=36769)
20	31723800	31725200	Lung	EnhPois	Enhancers	ERV2-1C-LTR_BT	LTR-ERVK	intergenic	gene-ZNF131(dist=143125),gene-SELENOP(dist=36569)
20	31725000	31725200	Abomasum	EnhPois	Enhancers	ERV2-1C-LTR_BT	LTR-ERVK	intergenic	gene-ZNF131(dist=144325),gene-SELENOP(dist=36569)
20	33175400	33176600	Lung	EnhPois	Enhancers	ERV2-1B-LTR_BT	LTR-ERVK	intronic	gene-PLCXD3
20	33175600	33176000	Jejunum	EnhPois	Enhancers	ERV2-1B-LTR_BT	LTR-ERVK	intronic	gene-PLCXD3
20	33175800	33176800	Colon	EnhPois	Enhancers	ERV2-1B-LTR_BT	LTR-ERVK	intronic	gene-PLCXD3
20	35250400	35251000	Spleen	EnhPois	Enhancers	BTLTR1D2	LTR-ERVK	intronic	gene-FYB1
20	39820800	39821600	Liver	EnhPois	Enhancers	BTLTR1	LTR-ERVK	intronic	gene-SLC45A2
20	41073400	41073600	Jejunum	EnhPois	Enhancers	ERV2-1B-LTR_BT	LTR-ERVK	intronic	gene-SUB1
20	41073600	41074600	Cecum	EnhPois	Enhancers	ERV2-1B-LTR_BT	LTR-ERVK	intronic	gene-SUB1
20	48127400	48127800	Rumen	EnhPois	Enhancers	BTLTR1B	LTR-ERVK	intergenic	gene-TRNAS-GGA-35(dist=395252),gene-TRNAF-AAA-5(dist=554076)
20	63027200	63028200	Jejunum	EnhPois	Enhancers	BTLTR1	LTR-ERVK	intergenic	gene-FAM173B(dist=8302),gene-TAS2R1(dist=529427)
20	64643800	64645600	Adipose	EnhPois	Enhancers	LTR2_BT	LTR-ERVK	intergenic	gene-SEMA5A(dist=420969),gene-MTRR(dist=664504)
21	237200	237800	Cecum	EnhPois	Enhancers	ERV2-1B-LTR_BT	LTR-ERVK	intergenic	gene-LOC101908235(dist=29224),gene-LOC112443201(dist=53738)
21	619200	619600	Cecum	EnhPois	Enhancers	ERV2-2B_BT-LTR	LTR-ERVK	intergenic	gene-LOC112443246(dist=21725),gene-LOC112443207(dist=86209)
21	624000	624600	Cecum	EnhPois	Enhancers	ERV2-2B_BT-I	LTR-ERVK	intergenic	gene-LOC112443246(dist=26525),gene-LOC112443207(dist=81209)
21	776000	776200	Cecum	EnhPois	Enhancers	ERV2-1-I_BT	LTR-ERVK	intergenic	gene-LOC112443209(dist=58679),gene-MKRN3(dist=383529)
21	776400	777800	Cecum	EnhPois	Enhancers	ERV2-1-I_BT	LTR-ERVK	intergenic	gene-LOC112443209(dist=59079),gene-MKRN3(dist=381929)
21	19633000	19633200	Colon	EnhPois	Enhancers	ERV2-3-I_BT	LTR-ERVK	exonic	gene-LOC101903572
21	19633000	19633200	Lung	EnhPois	Enhancers	ERV2-3-I_BT	LTR-ERVK	exonic	gene-LOC101903572
21	19633000	19633400	Cecum	EnhPois	Enhancers	ERV2-3-I_BT	LTR-ERVK	exonic	gene-LOC101903572
21	19885400	19885600	Jejunum	EnhPois	Enhancers	LTR3_BT	LTR-ERVK	intergenic	gene-LOC529925(dist=63371),gene-LOC101906218(dist=30929)
21	19885800	19886000	Jejunum	EnhPois	Enhancers	LTR3_BT	LTR-ERVK	intergenic	gene-LOC529925(dist=63771),gene-LOC101906218(dist=30529)
21	19901200	19901400	Colon	EnhPois	Enhancers	LTR3_BT	LTR-ERVK	intergenic	gene-LOC529925(dist=79171),gene-LOC101906218(dist=15129)
21	19901400	19901600	Spleen	EnhPois	Enhancers	LTR3_BT	LTR-ERVK	intergenic	gene-LOC529925(dist=79371),gene-LOC101906218(dist=14929)
21	20670800	20671000	Hypothalamus	EnhPois	Enhancers	BTLTR1F	LTR-ERVK	intronic	gene-ABHD2
21	23388600	23388800	Colon	EnhPois	Enhancers	ERV2-1C-LTR_BT	LTR-ERVK	intergenic	gene-C21H15orf40(dist=124484),gene-MEX3B(dist=479010)
21	56745600	56745800	Colon	EnhPois	Enhancers	BTLTR1	LTR-ERVK	intergenic	gene-TRIP11(dist=1043),gene-ATXN3(dist=11142)
21	56745600	56745800	Jejunum	EnhPois	Enhancers	BTLTR1	LTR-ERVK	intergenic	gene-TRIP11(dist=1043),gene-ATXN3(dist=11142)
21	58349200	58349400	Jejunum	EnhPois	Enhancers	ERV2-1B-LTR_BT	LTR-ERVK	intergenic	gene-UNC79(dist=16937),gene-PRIMA1(dist=4052)
21	61094000	61094200	Rumen	EnhPois	Enhancers	BTLTR1B	LTR-ERVK	intronic	gene-BDKRB2
21	67176400	67177200	Abomasum	EnhPois	Enhancers	ERV2-1C-LTR_BT	LTR-ERVK	intronic	gene-TECPR2
21	67176800	67177200	Lung	EnhPois	Enhancers	ERV2-1C-LTR_BT	LTR-ERVK	intronic	gene-TECPR2
21	68264800	68265000	Liver	EnhPois	Enhancers	ERV2-1B-LTR_BT	LTR-ERVK	intronic	gene-KLC1
22	1500800	1501400	Cecum	EnhPois	Enhancers	BTLTR1F	LTR-ERVK	intronic	gene-NEK10
22	6412600	6412800	Duodenum	EnhPois	Enhancers	BTLTR1	LTR-ERVK	intronic	gene-OSBPL10
22	6787400	6787800	Jejunum	EnhPois	Enhancers	BTLTR1E1	LTR-ERVK	intronic	gene-CMTM8
22	9930600	9930800	Jejunum	EnhPois	Enhancers	BTLTR1E3	LTR-ERVK	intergenic	gene-MIR128-2(dist=225303),gene-STAC(dist=196871)
22	10574400	10574800	Jejunum	EnhPois	Enhancers	BTLTR1F	LTR-ERVK	intergenic	gene-EPM2AIP1(dist=15393),gene-TRANK1(dist=15747)
22	11227800	11228400	Liver	EnhPois	Enhancers	BTLTR1	LTR-ERVK	intronic	gene-ITGA9
22	11228000	11228200	Cecum	EnhPois	Enhancers	BTLTR1	LTR-ERVK	intronic	gene-ITGA9
22	11228000	11228200	Colon	EnhPois	Enhancers	BTLTR1	LTR-ERVK	intronic	gene-ITGA9
22	14156400	14156600	Jejunum	EnhPois	Enhancers	BTLTR1B1	LTR-ERVK	intronic	gene-ULK4
22	17622000	17622200	Ileum	EnhPois	Enhancers	LTR2_BT	LTR-ERVK	intronic	gene-RAD18
22	21803800	21804200	Cecum	EnhPois	Enhancers	BTLTR1	LTR-ERVK	intronic	gene-ITPR1
22	21803800	21806200	Colon	EnhPois	Enhancers	BTLTR1	LTR-ERVK	intronic	gene-ITPR1
22	21804800	21805200	Cecum	EnhPois	Enhancers	BTLTR1	LTR-ERVK	intronic	gene-ITPR1
22	32202800	32203400	Lung	EnhPois	Enhancers	BTLTR1B	LTR-ERVK	intronic	gene-FRMD4B
22	32203600	32204600	Lung	EnhPois	Enhancers	BTLTR1B	LTR-ERVK	intronic	gene-FRMD4B
22	52930800	52932000	Lung	EnhPois	Enhancers	BTLTR1C	LTR-ERVK	UTR3	gene-LRRC2
22	52931000	52931800	Abomasum	EnhPois	Enhancers	BTLTR1C	LTR-ERVK	UTR3	gene-LRRC2
22	52931000	52931800	Cecum	EnhPois	Enhancers	BTLTR1C	LTR-ERVK	UTR3	gene-LRRC2
22	52931000	52931800	Colon	EnhPois	Enhancers	BTLTR1C	LTR-ERVK	UTR3	gene-LRRC2
22	52931800	52932000	Liver	EnhPois	Enhancers	BTLTR1C	LTR-ERVK	downstream	gene-LRRC2
22	55230600	55231000	Duodenum	EnhPois	Enhancers	BTLTR1E	LTR-ERVK	UTR5	gene-HRH1
22	57158200	57158800	Colon	EnhPois	Enhancers	ERV2-2B_BT-LTR	LTR-ERVK	UTR5	gene-RBSN
22	57158400	57160400	Cecum	EnhPois	Enhancers	ERV2-2B_BT-I	LTR-ERVK	UTR5	gene-RBSN
22	58443800	58444000	Hypothalamus	EnhPois	Enhancers	BTLTR1	LTR-ERVK	intergenic	gene-HDAC11(dist=1813),gene-NUP210(dist=37420)
23	2759800	2760000	Liver	EnhPois	Enhancers	LTR2_BT	LTR-ERVK	intronic	gene-PRIM2
23	2776400	2777400	Ileum	EnhPois	Enhancers	BTLTR1D2	LTR-ERVK	intronic	gene-PRIM2
23	4185200	4185400	Colon	EnhPois	Enhancers	BTLTR1	LTR-ERVK	intronic	gene-COL21A1
23	10294200	10294400	Jejunum	EnhPois	Enhancers	BTLTR1B1	LTR-ERVK	intergenic	gene-C23H6orf222(dist=1730),gene-PXT1(dist=46268)
23	22830000	22831000	Cecum	EnhPois	Enhancers	BTLTR1B	LTR-ERVK	intergenic	NONE(dist=NONE),gene-TFAP2D(dist=446602)
23	22830000	22831200	Jejunum	EnhPois	Enhancers	BTLTR1B	LTR-ERVK	intergenic	NONE(dist=NONE),gene-TFAP2D(dist=446402)
23	22830800	22831000	Colon	EnhPois	Enhancers	BTLTR1B	LTR-ERVK	intergenic	NONE(dist=NONE),gene-TFAP2D(dist=446602)
23	25094600	25096400	Colon	EnhPois	Enhancers	ERV2-1C-LTR_BT	LTR-ERVK	intergenic	gene-GSTA2(dist=6047),gene-GSTA1(dist=25965)
23	25095000	25096200	Lung	EnhPois	Enhancers	ERV2-1C-LTR_BT	LTR-ERVK	intergenic	gene-GSTA2(dist=6447),gene-GSTA1(dist=26165)
23	25095800	25096600	Cecum	EnhPois	Enhancers	ERV2-1C-LTR_BT	LTR-ERVK	intergenic	gene-GSTA2(dist=7247),gene-GSTA1(dist=25765)
23	26412600	26413000	Cecum	EnhPois	Enhancers	ERV2-1B-LTR_BT	LTR-ERVK	intronic	gene-LOC101903211
23	26726000	26726200	Abomasum	EnhPois	Enhancers	ERV2-1C-LTR_BT	LTR-ERVK	intergenic	gene-LOC112443756(dist=39376),gene-LOC100847986(dist=91908)
23	26726000	26726600	Ileum	EnhPois	Enhancers	ERV2-1C-LTR_BT	LTR-ERVK	intergenic	gene-LOC112443756(dist=39376),gene-LOC100847986(dist=91508)
23	26726000	26726800	Cecum	EnhPois	Enhancers	ERV2-1C-LTR_BT	LTR-ERVK	intergenic	gene-LOC112443756(dist=39376),gene-LOC100847986(dist=91308)
23	26726000	26726800	Colon	EnhPois	Enhancers	ERV2-1C-LTR_BT	LTR-ERVK	intergenic	gene-LOC112443756(dist=39376),gene-LOC100847986(dist=91308)
23	26726000	26726800	Duodenum	EnhPois	Enhancers	ERV2-1C-LTR_BT	LTR-ERVK	intergenic	gene-LOC112443756(dist=39376),gene-LOC100847986(dist=91308)
23	26726000	26726800	Jejunum	EnhPois	Enhancers	ERV2-1C-LTR_BT	LTR-ERVK	intergenic	gene-LOC112443756(dist=39376),gene-LOC100847986(dist=91308)
23	26726000	26726800	Lung	EnhPois	Enhancers	ERV2-1C-LTR_BT	LTR-ERVK	intergenic	gene-LOC112443756(dist=39376),gene-LOC100847986(dist=91308)
23	26932200	26932400	Cecum	EnhPois	Enhancers	ERV2-1-LTR_BT	LTR-ERVK	intronic	gene-C23H6orf10
23	27105800	27106600	Lung	EnhPois	Enhancers	ERV2-1C-LTR_BT	LTR-ERVK	intergenic	gene-LOC112443844(dist=10884),gene-LOC615223(dist=2831)
23	27106200	27106600	Jejunum	EnhPois	Enhancers	ERV2-1C-LTR_BT	LTR-ERVK	intergenic	gene-LOC112443844(dist=11284),gene-LOC615223(dist=2831)
23	28061400	28061600	Lung	EnhPois	Enhancers	BTLTR1F	LTR-ERVK	intergenic	gene-LOC616942(dist=2002),gene-TRNAG-CCC-150(dist=6005)
23	28689800	28690200	Cecum	EnhPois	Enhancers	ERV2-1C-LTR_BT	LTR-ERVK	intergenic	gene-JSP.1(dist=22339),gene-BOLA-3(dist=30298)
23	28689800	28690200	Duodenum	EnhPois	Enhancers	ERV2-1C-LTR_BT	LTR-ERVK	intergenic	gene-JSP.1(dist=22339),gene-BOLA-3(dist=30298)
23	28690400	28691200	Cecum	EnhPois	Enhancers	ERV2-1C-LTR_BT	LTR-ERVK	intergenic	gene-JSP.1(dist=22939),gene-BOLA-3(dist=29298)
23	28753400	28753600	Colon	EnhPois	Enhancers	ERV2-1C-LTR_BT	LTR-ERVK	intergenic	gene-BOLA-3(dist=29048),gene-LOC785873(dist=16218)
23	28754400	28754600	Colon	EnhPois	Enhancers	ERV2-1C-LTR_BT	LTR-ERVK	intergenic	gene-BOLA-3(dist=30048),gene-LOC785873(dist=15218)
23	29024200	29024600	Jejunum	EnhPois	Enhancers	BTLTR1	LTR-ERVK	intronic	gene-LOC786987
23	29043400	29043800	Jejunum	EnhPois	Enhancers	BTLTR1	LTR-ERVK	intronic	gene-LOC786987
23	29981800	29982800	Lung	EnhPois	Enhancers	BTLTR1J4	LTR-ERVK	intergenic	gene-LOC782554(dist=50295),gene-ZNF311(dist=11649)
23	29982000	29982600	Jejunum	EnhPois	Enhancers	BTLTR1J4	LTR-ERVK	intergenic	gene-LOC782554(dist=50495),gene-ZNF311(dist=11849)
23	29982600	29983000	Liver	EnhPois	Enhancers	BTLTR1J4	LTR-ERVK	intergenic	gene-LOC782554(dist=51095),gene-ZNF311(dist=11449)
23	29986800	29987000	Cecum	EnhPois	Enhancers	ERV2-2-I_BT	LTR-ERVK	intergenic	gene-LOC782554(dist=55295),gene-ZNF311(dist=7449)
23	29987400	29989000	Cecum	EnhPois	Enhancers	ERV2-2-I_BT	LTR-ERVK	intergenic	gene-LOC782554(dist=55895),gene-ZNF311(dist=5449)
23	29988800	29989000	Jejunum	EnhPois	Enhancers	ERV2-2-I_BT	LTR-ERVK	intergenic	gene-LOC782554(dist=57295),gene-ZNF311(dist=5449)
23	29989800	29990200	Jejunum	EnhPois	Enhancers	BTLTR1J4	LTR-ERVK	intergenic	gene-LOC782554(dist=58295),gene-ZNF311(dist=4249)
23	31419600	31420000	Ileum	EnhPois	Enhancers	BTLTR1C	LTR-ERVK	downstream	gene-TRNAM-CAU-29
23	31419600	31420400	Duodenum	EnhPois	Enhancers	BTLTR1C	LTR-ERVK	downstream	gene-TRNAM-CAU-29
23	31419600	31420600	Jejunum	EnhPois	Enhancers	BTLTR1C	LTR-ERVK	downstream	gene-TRNAM-CAU-29
23	31419600	31420600	Lung	EnhPois	Enhancers	BTLTR1C	LTR-ERVK	downstream	gene-TRNAM-CAU-29
23	31420200	31420400	Ileum	EnhPois	Enhancers	BTLTR1C	LTR-ERVK	intergenic	gene-TRNAM-CAU-29(dist=1038),gene-TRNAM-CAU-30(dist=5622)
23	41848400	41848600	Jejunum	EnhPois	Enhancers	BTLTR1	LTR-ERVK	intergenic	gene-TRNAC-GCA-231(dist=3520),gene-CD83(dist=807318)
23	50800000	50801200	Spleen	EnhPois	Enhancers	LTR2B_BT	LTR-ERVK	intergenic	gene-SERPINB9(dist=6512),gene-SERPINB1(dist=19461)
23	50800200	50801200	Colon	EnhPois	Enhancers	LTR2B_BT	LTR-ERVK	intergenic	gene-SERPINB9(dist=6712),gene-SERPINB1(dist=19461)
23	50800400	50801000	Cecum	EnhPois	Enhancers	LTR2B_BT	LTR-ERVK	intergenic	gene-SERPINB9(dist=6912),gene-SERPINB1(dist=19661)
23	50800400	50801000	Lung	EnhPois	Enhancers	LTR2B_BT	LTR-ERVK	intergenic	gene-SERPINB9(dist=6912),gene-SERPINB1(dist=19661)
23	50800600	50800800	Ileum	EnhPois	Enhancers	LTR2B_BT	LTR-ERVK	intergenic	gene-SERPINB9(dist=7112),gene-SERPINB1(dist=19861)
24	3961600	3961800	Cecum	EnhPois	Enhancers	BTLTR1	LTR-ERVK	intergenic	gene-LOC112444151(dist=3038),gene-CNDP1(dist=2629)
24	3961600	3963600	Duodenum	EnhPois	Enhancers	BTLTR1	LTR-ERVK	downstream	gene-CNDP1
24	3961800	3962000	Jejunum	EnhPois	Enhancers	BTLTR1	LTR-ERVK	intergenic	gene-LOC112444151(dist=3238),gene-CNDP1(dist=2429)
24	3962400	3963000	Jejunum	EnhPois	Enhancers	BTLTR1	LTR-ERVK	intergenic	gene-LOC112444151(dist=3838),gene-CNDP1(dist=1429)
24	12441800	12442600	Duodenum	EnhPois	Enhancers	LTR46_BT	LTR-ERVK	intergenic	gene-SERPINB8(dist=9488),gene-LOC281376(dist=4365)
24	13552000	13552200	Lung	EnhPois	Enhancers	BTLTR1J4	LTR-ERVK	intergenic	gene-SYT4(dist=891934),gene-PIK3C3(dist=325670)
24	41766200	41766600	Jejunum	EnhPois	Enhancers	ERV2-1B-LTR_BT	LTR-ERVK	intergenic	gene-PPP4R1(dist=65028),gene-RAB31(dist=20323)
24	46481800	46482000	Cortex	EnhPois	Enhancers	BTLTR1C	LTR-ERVK	intronic	gene-ST8SIA5
24	57042400	57042600	Cerebellum	EnhPois	Enhancers	BTLTR1B	LTR-ERVK	intergenic	gene-ATP8B1(dist=23311),gene-NEDD4L(dist=121181)
24	60317600	60318600	Liver	EnhPois	Enhancers	BTLTR1	LTR-ERVK	intronic	gene-RNF152
25	2139000	2140400	Lung	EnhPois	Enhancers	BTLTR1F	LTR-ERVK	intergenic	gene-PRSS27(dist=6038),gene-PRSS22(dist=37775)
25	2167400	2167600	Lung	EnhPois	Enhancers	LTR3_BT	LTR-ERVK	intergenic	gene-PRSS27(dist=34438),gene-PRSS22(dist=10575)
25	3859200	3859600	Lung	EnhPois	Enhancers	BTLTR1C	LTR-ERVK	intronic	gene-SEPT12
25	18151600	18152000	Lung	EnhPois	Enhancers	ERV2-2B_BT-I	LTR-ERVK	intronic	gene-ACSM2B
25	21276200	21276600	Liver	EnhPois	Enhancers	ERV2-1B-LTR_BT	LTR-ERVK	intronic	gene-PALB2
25	26117000	26117600	Lung	EnhPois	Enhancers	BTLTR1D	LTR-ERVK	intronic	gene-SGF29
25	26117600	26117800	Colon	EnhPois	Enhancers	BTLTR1D	LTR-ERVK	intronic	gene-SGF29
25	28194800	28195600	Jejunum	EnhPois	Enhancers	LTR2_BT	LTR-ERVK	intergenic	gene-TPST1(dist=6664),gene-KCTD7(dist=9057)
25	34636000	34636200	Rumen	EnhPois	Enhancers	BTLTR1F	LTR-ERVK	intronic	gene-PRKRIP1
25	36426600	36426800	Liver	EnhPois	Enhancers	LTR7_BT	LTR-ERVK	intergenic	gene-ZKSCAN1(dist=7742),gene-AZGP1(dist=18976)
25	36672600	36673000	Cecum	EnhPois	Enhancers	ERV2-1C-LTR_BT	LTR-ERVK	intronic	gene-CYP3A5-2
25	36673800	36674000	Cecum	EnhPois	Enhancers	ERV2-1C-LTR_BT	LTR-ERVK	intronic	gene-CYP3A5-2
25	36696200	36696400	Jejunum	EnhPois	Enhancers	ERV2-1B-LTR_BT	LTR-ERVK	intergenic	gene-CYP3A5-2(dist=4626),gene-CYP3A24(dist=13931)
25	38265200	38266600	Jejunum	EnhPois	Enhancers	BTLTR1	LTR-ERVK	intergenic	gene-LOC100140431(dist=11411),gene-RAC1(dist=11800)
26	10722800	10724800	Colon	EnhPois	Enhancers	BTLTR1B	LTR-ERVK	intergenic	gene-FAS(dist=10320),gene-CH25H(dist=215503)
26	10723000	10723600	Cecum	EnhPois	Enhancers	BTLTR1B	LTR-ERVK	intergenic	gene-FAS(dist=10520),gene-CH25H(dist=216703)
26	10723800	10724600	Cecum	EnhPois	Enhancers	BTLTR1B	LTR-ERVK	intergenic	gene-FAS(dist=11320),gene-CH25H(dist=215703)
26	11136000	11137000	Lung	EnhPois	Enhancers	BTLTR1D2	LTR-ERVK	intronic	gene-SLC16A12
26	11136200	11136800	Liver	EnhPois	Enhancers	BTLTR1D2	LTR-ERVK	intronic	gene-SLC16A12
26	16171800	16172600	Duodenum	EnhPois	Enhancers	BTLTR1F	LTR-ERVK	intronic	gene-CYP2C87
26	16171800	16173400	Jejunum	EnhPois	Enhancers	BTLTR1F	LTR-ERVK	intronic	gene-CYP2C87
26	16172800	16173400	Duodenum	EnhPois	Enhancers	BTLTR1F	LTR-ERVK	intronic	gene-CYP2C87
26	16173000	16173400	Abomasum	EnhPois	Enhancers	BTLTR1F	LTR-ERVK	intronic	gene-CYP2C87
26	16173200	16173400	Ileum	EnhPois	Enhancers	BTLTR1F	LTR-ERVK	intronic	gene-CYP2C87
26	16173200	16173400	Lung	EnhPois	Enhancers	BTLTR1F	LTR-ERVK	intronic	gene-CYP2C87
26	21065200	21065400	Rumen	EnhPois	Enhancers	BTLTR1B	LTR-ERVK	intronic	gene-ERLIN1
26	21065400	21065600	Jejunum	EnhPois	Enhancers	BTLTR1B	LTR-ERVK	intronic	gene-ERLIN1
26	21065400	21065600	Lung	EnhPois	Enhancers	BTLTR1B	LTR-ERVK	intronic	gene-ERLIN1
26	25625000	25625800	Lung	EnhPois	Enhancers	ERV2-1-LTR_BT	LTR-ERVK	intronic	gene-PAOX,gene-SORCS3
26	25626400	25626600	Lung	EnhPois	Enhancers	ERV2-1-LTR_BT	LTR-ERVK	intronic	gene-PAOX,gene-SORCS3
26	25682600	25682800	Jejunum	EnhPois	Enhancers	BTLTR1	LTR-ERVK	UTR3	gene-LOC101905041
27	5979800	5980000	Cecum	EnhPois	Enhancers	ERV2-3-LTR_BT	LTR-ERVK	intergenic	gene-LOC100140788(dist=58571),gene-TAP(dist=33829)
27	38853000	38854200	Cecum	EnhPois	Enhancers	ERV2-1C-LTR_BT	LTR-ERVK	intronic	gene-PSD3
27	38853200	38854200	Abomasum	EnhPois	Enhancers	ERV2-1C-LTR_BT	LTR-ERVK	intronic	gene-PSD3
27	38854000	38854200	Colon	EnhPois	Enhancers	ERV2-1C-LTR_BT	LTR-ERVK	intronic	gene-PSD3
27	39498200	39498400	Colon	EnhPois	Enhancers	BTLTR1	LTR-ERVK	intergenic	gene-LRRC3B(dist=109970),gene-LOC100847782(dist=458565)
27	39498200	39498400	Jejunum	EnhPois	Enhancers	BTLTR1	LTR-ERVK	intergenic	gene-LRRC3B(dist=109970),gene-LOC100847782(dist=458565)
27	44720600	44721000	Lung	EnhPois	Enhancers	ERV2-1B-LTR_BT	LTR-ERVK	intergenic	gene-TRNAW-CCA-60(dist=190690),gene-TRNAG-GCC-24(dist=58611)
28	2901400	2901600	Lung	EnhPois	Enhancers	BTLTR1C	LTR-ERVK	intergenic	gene-LOC100337323(dist=10163),gene-LOC614741(dist=50358)
28	2901800	2902600	Lung	EnhPois	Enhancers	BTLTR1C	LTR-ERVK	intergenic	gene-LOC100337323(dist=10563),gene-LOC614741(dist=49358)
28	3327600	3328000	Jejunum	EnhPois	Enhancers	ERV2-2B_BT-I	LTR-ERVK	intergenic	gene-LOC614741(dist=17925),gene-C28H1orf198(dist=234195)
28	14938200	14938400	Cecum	EnhPois	Enhancers	ERV2-1C-LTR_BT	LTR-ERVK	intronic	gene-FAM13C
28	14938600	14939200	Abomasum	EnhPois	Enhancers	ERV2-1C-LTR_BT	LTR-ERVK	intronic	gene-FAM13C
28	14938600	14939400	Colon	EnhPois	Enhancers	ERV2-1C-LTR_BT	LTR-ERVK	intronic	gene-FAM13C
28	14939000	14939200	Cecum	EnhPois	Enhancers	ERV2-1C-LTR_BT	LTR-ERVK	intronic	gene-FAM13C
28	29182800	29183200	Jejunum	EnhPois	Enhancers	ERV2-1B-LTR_BT	LTR-ERVK	intergenic	gene-P4HA1(dist=15306),gene-NUDT13(dist=6638)
28	29183000	29183200	Colon	EnhPois	Enhancers	ERV2-1B-LTR_BT	LTR-ERVK	intergenic	gene-P4HA1(dist=15506),gene-NUDT13(dist=6638)
29	8791600	8792000	Cecum	EnhPois	Enhancers	LTR2_BT	LTR-ERVK	intergenic	gene-PRSS23(dist=36229),gene-ME3(dist=99376)
29	18000800	18001000	Jejunum	EnhPois	Enhancers	BTLTR1B	LTR-ERVK	intergenic	gene-THRSP(dist=5855),gene-KCTD14(dist=18304)
29	26501600	26501800	Cecum	EnhPois	Enhancers	ERV2-1C-LTR_BT	LTR-ERVK	upstream	gene-M-SAA3.2
29	36030800	36031000	Jejunum	EnhPois	Enhancers	BTLTR1B	LTR-ERVK	intergenic	gene-NTM(dist=490400),gene-TMEM45B(dist=9191)
29	40534200	40534400	Cecum	EnhPois	Enhancers	BTLTR1B1	LTR-ERVK	intergenic	gene-FTH1(dist=54005),gene-INCENP(dist=61809)
29	40534200	40534400	Jejunum	EnhPois	Enhancers	BTLTR1B1	LTR-ERVK	intergenic	gene-FTH1(dist=54005),gene-INCENP(dist=61809)
29	40534200	40534400	Lung	EnhPois	Enhancers	BTLTR1B1	LTR-ERVK	intergenic	gene-FTH1(dist=54005),gene-INCENP(dist=61809)
29	41172400	41172600	Liver	EnhPois	Enhancers	ERV2-1-I_BT	LTR-ERVK	intronic	gene-SLC3A2
29	41172400	41172600	Spleen	EnhPois	Enhancers	ERV2-1-I_BT	LTR-ERVK	intronic	gene-SLC3A2
29	41175200	41175600	Colon	EnhPois	Enhancers	ERV2-1-I_BT	LTR-ERVK	intronic	gene-SLC3A2
29	44421000	44421800	Duodenum	EnhPois	Enhancers	ERV2-1C-LTR_BT	LTR-ERVK	intergenic	gene-SLC29A2(dist=2054),gene-NPAS4(dist=42486)
29	44421000	44421800	Jejunum	EnhPois	Enhancers	ERV2-1C-LTR_BT	LTR-ERVK	intergenic	gene-SLC29A2(dist=2054),gene-NPAS4(dist=42486)
29	44421200	44421800	Abomasum	EnhPois	Enhancers	ERV2-1C-LTR_BT	LTR-ERVK	intergenic	gene-SLC29A2(dist=2254),gene-NPAS4(dist=42486)
29	44421200	44421800	Cecum	EnhPois	Enhancers	ERV2-1C-LTR_BT	LTR-ERVK	intergenic	gene-SLC29A2(dist=2254),gene-NPAS4(dist=42486)
29	44421200	44422400	Colon	EnhPois	Enhancers	ERV2-1C-LTR_BT	LTR-ERVK	intergenic	gene-SLC29A2(dist=2254),gene-NPAS4(dist=41886)
29	44422400	44422600	Abomasum	EnhPois	Enhancers	BTLTR1	LTR-ERVK	intergenic	gene-SLC29A2(dist=3454),gene-NPAS4(dist=41686)
29	44423200	44423600	Abomasum	EnhPois	Enhancers	BTLTR1	LTR-ERVK	intergenic	gene-SLC29A2(dist=4254),gene-NPAS4(dist=40686)
29	44434400	44434600	Ileum	EnhPois	Enhancers	BTLTR1	LTR-ERVK	intergenic	gene-SLC29A2(dist=15454),gene-NPAS4(dist=29686)
29	50926800	50928000	Ileum	EnhPois	Enhancers	LTR2_BT	LTR-ERVK	intergenic	gene-B4GALNT4(dist=17610),gene-IFITM3(dist=2482)
29	50927000	50927800	Abomasum	EnhPois	Enhancers	LTR2_BT	LTR-ERVK	intergenic	gene-B4GALNT4(dist=17810),gene-IFITM3(dist=2682)
29	50928400	50930200	Jejunum	EnhPois	Enhancers	ERV2-1-I_BT	LTR-ERVK	upstream	gene-IFITM3
29	50928800	50929800	Colon	EnhPois	Enhancers	ERV2-1-I_BT	LTR-ERVK	upstream	gene-IFITM3
29	50929000	50930200	Duodenum	EnhPois	Enhancers	ERV2-1-I_BT	LTR-ERVK	upstream	gene-IFITM3
29	50929400	50929600	Cecum	EnhPois	Enhancers	ERV2-1-I_BT	LTR-ERVK	upstream	gene-IFITM3
29	50929400	50930000	Liver	EnhPois	Enhancers	ERV2-1-I_BT	LTR-ERVK	upstream	gene-IFITM3
29	50929600	50929800	Cortex	EnhPois	Enhancers	ERV2-1-I_BT	LTR-ERVK	upstream	gene-IFITM3
29	51081200	51082200	Rumen	EnhPois	Enhancers	BTLTR1B	LTR-ERVK	intergenic	gene-LOC529792(dist=17747),NONE(dist=NONE)
29	51081800	51082600	Duodenum	EnhPois	Enhancers	BTLTR1B	LTR-ERVK	intergenic	gene-LOC529792(dist=18347),NONE(dist=NONE)
3	8900200	8901800	Lung	EnhPois	Enhancers	BTLTR1	LTR-ERVK	upstream	gene-CD48
3	8900400	8901800	Colon	EnhPois	Enhancers	BTLTR1	LTR-ERVK	upstream	gene-CD48
3	8916200	8916400	Ileum	EnhPois	Enhancers	BTLTR1C	LTR-ERVK	intronic	gene-CD48
3	9221400	9221800	Ileum	EnhPois	Enhancers	BTLTR1C	LTR-ERVK	intergenic	gene-SLAMF6(dist=45890),gene-VANGL2(dist=41756)
3	10699400	10700200	Lung	EnhPois	Enhancers	BTLTR1D2	LTR-ERVK	upstream	gene-IFI16
3	10699600	10700600	Liver	EnhPois	Enhancers	BTLTR1D2	LTR-ERVK	upstream	gene-IFI16
3	10699800	10700600	Duodenum	EnhPois	Enhancers	BTLTR1D2	LTR-ERVK	upstream	gene-IFI16
3	12785000	12785600	Lung	EnhPois	Enhancers	ERV2-1C-LTR_BT	LTR-ERVK	intergenic	gene-FCRL4(dist=6533),gene-FCRL5(dist=18584)
3	13576800	13577000	Spleen	EnhPois	Enhancers	BTLTR1B	LTR-ERVK	intergenic	gene-LOC101906408(dist=48124),gene-TRNAS-GGA-6(dist=83290)
3	20804000	20805000	Lung	EnhPois	Enhancers	BTLTR1D2	LTR-ERVK	intronic	gene-FCGR1A,gene-LOC788142
3	23846000	23846200	Liver	EnhPois	Enhancers	BTLTR1B	LTR-ERVK	intergenic	gene-HAO2(dist=81815),gene-WARS2(dist=153015)
3	27209200	27209400	Jejunum	EnhPois	Enhancers	BTLTR1	LTR-ERVK	intergenic	gene-MAB21L3(dist=1052),gene-SLC22A15(dist=49268)
3	27210000	27210200	Jejunum	EnhPois	Enhancers	BTLTR1	LTR-ERVK	intergenic	gene-MAB21L3(dist=1852),gene-SLC22A15(dist=48468)
3	33608600	33609000	Ileum	EnhPois	Enhancers	BTLTR1	LTR-ERVK	intergenic	gene-MIR2413(dist=20146),gene-EPS8L3(dist=25755)
3	33608800	33609000	Jejunum	EnhPois	Enhancers	BTLTR1	LTR-ERVK	intergenic	gene-MIR2413(dist=20346),gene-EPS8L3(dist=25755)
3	33609600	33609800	Jejunum	EnhPois	Enhancers	BTLTR1	LTR-ERVK	intergenic	gene-MIR2413(dist=21146),gene-EPS8L3(dist=24955)
3	34360200	34360400	Lung	EnhPois	Enhancers	BTLTR1J	LTR-ERVK	intronic	gene-WDR47
3	35386800	35388800	Lung	EnhPois	Enhancers	BTLTR1	LTR-ERVK	intronic	gene-VAV3
3	41821400	41821800	Lung	EnhPois	Enhancers	BTLTR1C	LTR-ERVK	intergenic	gene-OLFM3(dist=326109),gene-S1PR1(dist=211154)
3	42878800	42879600	Abomasum	EnhPois	Enhancers	ERV2-1B-LTR_BT	LTR-ERVK	intronic	gene-CDC14A
3	54448600	54451000	Cecum	EnhPois	Enhancers	BTLTR1C	LTR-ERVK	intronic	gene-GBP4
3	54448600	54451000	Jejunum	EnhPois	Enhancers	BTLTR1C	LTR-ERVK	intronic	gene-GBP4
3	54448800	54449000	Duodenum	EnhPois	Enhancers	BTLTR1C	LTR-ERVK	intronic	gene-GBP4
3	54449000	54449400	Colon	EnhPois	Enhancers	BTLTR1C	LTR-ERVK	intronic	gene-GBP4
3	73640200	73640400	Lung	EnhPois	Enhancers	BTLTR1C	LTR-ERVK	intronic	gene-NEGR1
3	73640800	73641200	Lung	EnhPois	Enhancers	BTLTR1C	LTR-ERVK	intronic	gene-NEGR1
3	80669400	80669600	Jejunum	EnhPois	Enhancers	ERV2-1-LTR_BT	LTR-ERVK	intronic	gene-RAVER2
3	91051800	91052400	Lung	EnhPois	Enhancers	BTLTR1D2	LTR-ERVK	intergenic	gene-TRNAW-CCA-9(dist=1318215),gene-USP24(dist=79012)
3	93443600	93444400	Lung	EnhPois	Enhancers	ERV2-1B-LTR_BT	LTR-ERVK	intronic	gene-ECHDC2
3	99190000	99190800	Duodenum	EnhPois	Enhancers	LTR2C_BT	LTR-ERVK	intergenic	gene-LOC100847677(dist=72405),gene-CYP4A11(dist=17758)
3	99190200	99191200	Liver	EnhPois	Enhancers	LTR2C_BT	LTR-ERVK	intergenic	gene-LOC100847677(dist=72605),gene-CYP4A11(dist=17358)
3	99190400	99191400	Colon	EnhPois	Enhancers	LTR2C_BT	LTR-ERVK	intergenic	gene-LOC100847677(dist=72805),gene-CYP4A11(dist=17158)
3	99190400	99191800	Ileum	EnhPois	Enhancers	LTR2C_BT	LTR-ERVK	intergenic	gene-LOC100847677(dist=72805),gene-CYP4A11(dist=16758)
3	99190600	99191800	Jejunum	EnhPois	Enhancers	LTR2C_BT	LTR-ERVK	intergenic	gene-LOC100847677(dist=73005),gene-CYP4A11(dist=16758)
3	101000000	101000000	Colon	EnhPois	Enhancers	BTLTR1F	LTR-ERVK	intergenic	gene-AKR1A1(dist=6072),gene-PRDX1(dist=26141)
3	101000000	101000000	Lung	EnhPois	Enhancers	BTLTR1F	LTR-ERVK	intergenic	gene-AKR1A1(dist=6072),gene-PRDX1(dist=25941)
3	101000000	101000000	Jejunum	EnhPois	Enhancers	BTLTR1F	LTR-ERVK	intergenic	gene-AKR1A1(dist=6272),gene-PRDX1(dist=26341)
3	101000000	101000000	Abomasum	EnhPois	Enhancers	BTLTR1F	LTR-ERVK	intergenic	gene-AKR1A1(dist=7272),gene-PRDX1(dist=26341)
3	101000000	101000000	Cecum	EnhPois	Enhancers	BTLTR1F	LTR-ERVK	intergenic	gene-AKR1A1(dist=7272),gene-PRDX1(dist=26341)
3	101000000	101000000	Duodenum	EnhPois	Enhancers	BTLTR1F	LTR-ERVK	intergenic	gene-AKR1A1(dist=7272),gene-PRDX1(dist=25741)
3	101000000	101000000	Ileum	EnhPois	Enhancers	BTLTR1F	LTR-ERVK	intergenic	gene-AKR1A1(dist=7472),gene-PRDX1(dist=26341)
3	102000000	102000000	Liver	EnhPois	Enhancers	BTLTR1	LTR-ERVK	intronic	gene-ST3GAL3
3	102000000	102000000	Liver	EnhPois	Enhancers	BTLTR1	LTR-ERVK	intronic	gene-ST3GAL3
3	103000000	103000000	Abomasum	EnhPois	Enhancers	LTR3_BT	LTR-ERVK	intronic	gene-LOC531090
3	113000000	113000000	Jejunum	EnhPois	Enhancers	BTLTR1F	LTR-ERVK	intronic	gene-USP40
3	113000000	113000000	Jejunum	EnhPois	Enhancers	BTLTR1F	LTR-ERVK	intronic	gene-USP40
3	117000000	117000000	Lung	EnhPois	Enhancers	ERV2-1B-LTR_BT	LTR-ERVK	intronic	gene-RAB17
3	120000000	120000000	Liver	EnhPois	Enhancers	BTLTR1B1	LTR-ERVK	intronic	gene-ANO7
3	120000000	120000000	Jejunum	EnhPois	Enhancers	BTLTR1B1	LTR-ERVK	exonic	gene-ANO7
3	121000000	121000000	Duodenum	EnhPois	Enhancers	ERV2-1B-LTR_BT	LTR-ERVK	intergenic	gene-D2HGDH(dist=7817),gene-GAL3ST2(dist=1677)
3	121000000	121000000	Jejunum	EnhPois	Enhancers	ERV2-1B-LTR_BT	LTR-ERVK	intergenic	gene-D2HGDH(dist=8017),gene-GAL3ST2(dist=1277)
3	121000000	121000000	Jejunum	EnhPois	Enhancers	ERV2-1B-LTR_BT	LTR-ERVK	upstream	gene-GAL3ST2
3	121000000	121000000	Colon	EnhPois	Enhancers	ERV2-1B-LTR_BT	LTR-ERVK	upstream	gene-GAL3ST2
4	8706600	8706800	Lung	EnhPois	Enhancers	BTLTR1C	LTR-ERVK	intergenic	gene-FZD1(dist=36536),gene-MTERF1(dist=540765)
4	12964000	12966000	Liver	EnhPois	Enhancers	BTLTR1	LTR-ERVK	intergenic	gene-PDK4(dist=68639),gene-DYNC1I1(dist=95907)
4	14695600	14695800	Cecum	EnhPois	Enhancers	BTLTR1	LTR-ERVK	intergenic	gene-SDHAF3(dist=127674),gene-TAC1(dist=318577)
4	14695600	14695800	Colon	EnhPois	Enhancers	BTLTR1	LTR-ERVK	intergenic	gene-SDHAF3(dist=127674),gene-TAC1(dist=318577)
4	30644800	30645800	Cecum	EnhPois	Enhancers	BTLTR1B1	LTR-ERVK	intronic	gene-LOC104968411
4	30644800	30645800	Colon	EnhPois	Enhancers	BTLTR1B1	LTR-ERVK	intronic	gene-LOC104968411
4	30645800	30646000	Lung	EnhPois	Enhancers	BTLTR1B1	LTR-ERVK	intronic	gene-LOC104968411
4	31179800	31180000	Ileum	EnhPois	Enhancers	BTLTR1B	LTR-ERVK	intergenic	gene-RAPGEF5(dist=36524),gene-IL6(dist=274775)
4	44430200	44430400	Duodenum	EnhPois	Enhancers	BTLTR1B1	LTR-ERVK	intronic	gene-ARMC10,gene-NAPEPLD
4	44466400	44466600	Cecum	EnhPois	Enhancers	LTR3_BT	LTR-ERVK	intronic	gene-ARMC10,gene-NAPEPLD
4	44466400	44466600	Duodenum	EnhPois	Enhancers	LTR3_BT	LTR-ERVK	intronic	gene-ARMC10,gene-NAPEPLD
4	44467000	44467200	Cecum	EnhPois	Enhancers	LTR3_BT	LTR-ERVK	intronic	gene-ARMC10,gene-NAPEPLD
4	44467000	44467200	Duodenum	EnhPois	Enhancers	LTR3_BT	LTR-ERVK	intronic	gene-ARMC10,gene-NAPEPLD
4	65748600	65748800	Colon	EnhPois	Enhancers	ERV2-1-I_BT	LTR-ERVK	intronic	gene-GARS
4	76137600	76138000	Liver	EnhPois	Enhancers	BTLTR1B	LTR-ERVK	intergenic	gene-IGFBP1(dist=1365),gene-LOC112446404(dist=9186)
4	76138600	76139000	Liver	EnhPois	Enhancers	BTLTR1B	LTR-ERVK	intergenic	gene-IGFBP1(dist=2365),gene-LOC112446404(dist=8186)
4	82517800	82518000	Jejunum	EnhPois	Enhancers	BTLTR1B	LTR-ERVK	intergenic	gene-AMPH(dist=9139),gene-LOC100335205(dist=25813)
4	84966600	84968000	Jejunum	EnhPois	Enhancers	BTLTR1	LTR-ERVK	intronic	gene-KCND2
4	98919800	98920000	Liver	EnhPois	Enhancers	ERV2-2-I_BT	LTR-ERVK	intronic	gene-LOC514257
4	99137000	99137600	Lung	EnhPois	Enhancers	ERV2-1B-LTR_BT	LTR-ERVK	intronic	gene-LOC100298868
4	99137800	99138200	Lung	EnhPois	Enhancers	ERV2-1B-LTR_BT	LTR-ERVK	intronic	gene-LOC100298868
4	107000000	107000000	Liver	EnhPois	Enhancers	LTR2_BT	LTR-ERVK	UTR3	gene-TCAF2
4	117000000	117000000	Lung	EnhPois	Enhancers	ERV2-1-LTR_BT	LTR-ERVK	intergenic	gene-HTR5A(dist=80477),gene-INSIG1(dist=41958)
5	467000	468000	Cortex	EnhPois	Enhancers	BTLTR1	LTR-ERVK	intergenic	gene-LOC782348(dist=50201),gene-MIR2284Y-6(dist=146532)
5	5711200	5713000	Ileum	EnhPois	Enhancers	BTLTR1B	LTR-ERVK	intergenic	gene-NAP1L1(dist=82593),gene-TRNAC-GCA-66(dist=76549)
5	5722400	5722600	Cerebellum	EnhPois	Enhancers	BTLTR1	LTR-ERVK	intergenic	gene-NAP1L1(dist=93793),gene-TRNAC-GCA-66(dist=66949)
5	28802200	28803200	Lung	EnhPois	Enhancers	BTLTR1E1	LTR-ERVK	intergenic	gene-SLC11A2(dist=44224),gene-LOC512464(dist=43207)
5	28802600	28802800	Jejunum	EnhPois	Enhancers	BTLTR1E1	LTR-ERVK	intergenic	gene-SLC11A2(dist=44624),gene-LOC512464(dist=43607)
5	28802600	28803200	Cecum	EnhPois	Enhancers	BTLTR1E1	LTR-ERVK	intergenic	gene-SLC11A2(dist=44624),gene-LOC512464(dist=43207)
5	36568600	36569400	Lung	EnhPois	Enhancers	BTLTR1E	LTR-ERVK	intronic	gene-TMEM117
5	38953800	38954000	Rumen	EnhPois	Enhancers	BTLTR1B	LTR-ERVK	intergenic	gene-GXYLT1(dist=357699),gene-PDZRN4(dist=246825)
5	44131400	44133600	Rumen	EnhPois	Enhancers	BTLTR1F	LTR-ERVK	intergenic	gene-LYZ1(dist=5836),gene-LOC785803(dist=55469)
5	44132400	44132600	Abomasum	EnhPois	Enhancers	BTLTR1F	LTR-ERVK	intergenic	gene-LYZ1(dist=6836),gene-LOC785803(dist=56469)
5	44132600	44134400	Duodenum	EnhPois	Enhancers	BTLTR1F	LTR-ERVK	intergenic	gene-LYZ1(dist=7036),gene-LOC785803(dist=54669)
5	44133400	44133800	Abomasum	EnhPois	Enhancers	BTLTR1F	LTR-ERVK	intergenic	gene-LYZ1(dist=7836),gene-LOC785803(dist=55269)
5	74641800	74642200	Abomasum	EnhPois	Enhancers	BTLTR1	LTR-ERVK	intergenic	gene-LOC112446726(dist=7779),gene-LOC619179(dist=13867)
5	74675400	74676800	Jejunum	EnhPois	Enhancers	BTLTR1B1	LTR-ERVK	intronic	gene-APOL3-2
5	75470000	75470400	Lung	EnhPois	Enhancers	BTLTR1D	LTR-ERVK	intergenic	gene-MPST(dist=18009),gene-KCTD17(dist=9448)
5	75470000	75470800	Spleen	EnhPois	Enhancers	BTLTR1D	LTR-ERVK	intergenic	gene-MPST(dist=18009),gene-KCTD17(dist=9048)
5	78074200	78074400	Lung	EnhPois	Enhancers	LTR7_BT	LTR-ERVK	intergenic	gene-KIAA1551(dist=123222),gene-AMN1(dist=101743)
5	82901400	82901600	Ileum	EnhPois	Enhancers	ERV2-1B-LTR_BT	LTR-ERVK	intergenic	gene-INTS13(dist=5316),gene-ITPR2(dist=81573)
5	91072400	91072800	Lung	EnhPois	Enhancers	BTLTR1B	LTR-ERVK	intergenic	gene-LOC112446825(dist=133990),gene-CAPZA3(dist=261873)
5	96889600	96890400	Liver	EnhPois	Enhancers	BTLTR1E2	LTR-ERVK	intronic	gene-HEBP1
5	100000000	100000000	Colon	EnhPois	Enhancers	ERV2-1C-LTR_BT	LTR-ERVK	intergenic	gene-LOC509972(dist=10379),gene-LOC784451(dist=4413)
5	100000000	100000000	Jejunum	EnhPois	Enhancers	ERV2-1C-LTR_BT	LTR-ERVK	intergenic	gene-LOC509972(dist=10379),gene-LOC784451(dist=4413)
5	100000000	100000000	Spleen	EnhPois	Enhancers	ERV2-1C-LTR_BT	LTR-ERVK	intergenic	gene-LOC509972(dist=10779),gene-LOC784451(dist=4213)
5	100000000	100000000	Lung	EnhPois	Enhancers	ERV2-1C-LTR_BT	LTR-ERVK	intergenic	gene-LOC509972(dist=10979),gene-LOC784451(dist=4013)
5	100000000	100000000	Colon	EnhPois	Enhancers	ERV2-1C-LTR_BT	LTR-ERVK	intergenic	gene-LOC509972(dist=10979),gene-LOC784451(dist=3413)
5	100000000	100000000	Lung	EnhPois	Enhancers	BTLTR1	LTR-ERVK	intronic	gene-LOC784451
5	101000000	101000000	Lung	EnhPois	Enhancers	ERV2-2B_BT-LTR	LTR-ERVK	intergenic	gene-LOC112446744(dist=57332),gene-OVOS2(dist=93184)
5	101000000	101000000	Adipose	EnhPois	Enhancers	LTR2C_BT	LTR-ERVK	intergenic	gene-A2M(dist=26662),gene-KLRG1(dist=27584)
5	102000000	102000000	Jejunum	EnhPois	Enhancers	ERV2-2B_BT-I	LTR-ERVK	ncRNA_intronic	gene-LOC751788
5	102000000	102000000	Jejunum	EnhPois	Enhancers	ERV2-2B_BT-I	LTR-ERVK	ncRNA_intronic	gene-LOC751788
5	108000000	108000000	Ileum	EnhPois	Enhancers	BTLTR1	LTR-ERVK	upstream	gene-CACNA2D4
5	108000000	108000000	Ileum	EnhPois	Enhancers	BTLTR1	LTR-ERVK	intergenic	gene-CACNA2D4(dist=1256),gene-DCP1B(dist=15552)
6	5932400	5932800	Jejunum	EnhPois	Enhancers	BTLTR1	LTR-ERVK	intergenic	gene-PDE5A(dist=38166),gene-FABP2(dist=37313)
6	5933400	5933600	Cecum	EnhPois	Enhancers	BTLTR1	LTR-ERVK	intergenic	gene-PDE5A(dist=39166),gene-FABP2(dist=36513)
6	13357000	13357400	Ileum	EnhPois	Enhancers	BTLTR1C	LTR-ERVK	intronic	gene-FAM241A
6	24859800	24860000	Jejunum	EnhPois	Enhancers	BTLTR1	LTR-ERVK	upstream	gene-DAPP1
6	24859800	24861000	Duodenum	EnhPois	Enhancers	BTLTR1	LTR-ERVK	upstream	gene-DAPP1
6	24860200	24861000	Jejunum	EnhPois	Enhancers	BTLTR1	LTR-ERVK	upstream	gene-DAPP1
6	25281800	25282600	Liver	EnhPois	Enhancers	BTLTR1	LTR-ERVK	intronic	gene-ADH1C
6	25398200	25398800	Liver	EnhPois	Enhancers	BTLTR1D2	LTR-ERVK	UTR5	gene-ADH6-2
6	42007800	42008400	Liver	EnhPois	Enhancers	LTR46_BT	LTR-ERVK	intronic	gene-ADGRA3
6	59721000	59721800	Cecum	EnhPois	Enhancers	BTLTR1E1	LTR-ERVK	intronic	gene-APBB2
6	59721000	59721800	Colon	EnhPois	Enhancers	BTLTR1E1	LTR-ERVK	intronic	gene-APBB2
6	70102200	70102600	Lung	EnhPois	Enhancers	ERV2-1-I_BT	LTR-ERVK	intergenic	gene-PDGFRA(dist=330652),gene-KIT(dist=64080)
6	83288600	83289400	Lung	EnhPois	Enhancers	BTLTR1D2	LTR-ERVK	intergenic	gene-CENPC(dist=11045),gene-STAP1(dist=2233)
6	84884400	84884800	Duodenum	EnhPois	Enhancers	BTLTR1F	LTR-ERVK	intergenic	gene-LOC526979(dist=36698),gene-LOC781988(dist=64680)
6	84884400	84884800	Lung	EnhPois	Enhancers	BTLTR1F	LTR-ERVK	intergenic	gene-LOC526979(dist=36698),gene-LOC781988(dist=64680)
6	84885200	84885400	Colon	EnhPois	Enhancers	BTLTR1F	LTR-ERVK	intergenic	gene-LOC526979(dist=37498),gene-LOC781988(dist=64080)
6	84885200	84885600	Cecum	EnhPois	Enhancers	BTLTR1F	LTR-ERVK	intergenic	gene-LOC526979(dist=37498),gene-LOC781988(dist=63880)
6	84885200	84885600	Duodenum	EnhPois	Enhancers	BTLTR1F	LTR-ERVK	intergenic	gene-LOC526979(dist=37498),gene-LOC781988(dist=63880)
6	84885400	84885600	Abomasum	EnhPois	Enhancers	BTLTR1F	LTR-ERVK	intergenic	gene-LOC526979(dist=37698),gene-LOC781988(dist=63880)
6	84885400	84886000	Lung	EnhPois	Enhancers	BTLTR1F	LTR-ERVK	intergenic	gene-LOC526979(dist=37698),gene-LOC781988(dist=63480)
6	87172400	87173800	Duodenum	EnhPois	Enhancers	BTLTR1	LTR-ERVK	intergenic	gene-GC(dist=165227),gene-NPFFR2(dist=75187)
6	87172800	87173800	Cecum	EnhPois	Enhancers	BTLTR1	LTR-ERVK	intergenic	gene-GC(dist=165627),gene-NPFFR2(dist=75187)
[truncated: 275 more rows]
