# Supplementary material
Source: HighWire-hosted journal article supplement (doi:10.1101/gr.281289.125)
Supplement: Supplemental_Table_S11.xlsx [file Supplemental_Table_S11.xlsx]

## Sheet: Table S11
Table S11: Annotation results of human KZFP genes validated by the pipeline.
GeneName	Isoforms ID	KRAB (Count)	C2H2 (Count)	SCAN (Count)	DUF3669(Count)
ZNF222	ENST00000187879	1	11	0	0
ZNF416	ENST00000196489	1	12	0	0
MZF1	ENST00000215057	0	13	1	0
ZNF263	ENST00000219069	1	9	1	0
ZNF500	ENST00000219478	1	5	1	0
ZNF432	ENST00000221315	1	17	0	0
ZNF180	ENST00000221327	1	12	0	0
ZNF510	ENST00000223428	1	11	0	0
ZNF688	ENST00000223459	1	2	0	0
ZNF268	ENST00000228289	1	24	0	0
ZNF211	ENST00000240731	1	13	0	0
ZNF442	ENST00000242804	1	17	0	0
ZNF415	ENST00000243643	1	11	0	0
ZNF350	ENST00000243644	1	8	0	0
ZNF777	ENST00000247930	1	9	0	1
ZNF317	ENST00000247956	1	14	0	0
ZNF232	ENST00000250076	0	5	1	0
ZSCAN9	ENST00000252207	0	5	1	0
ZKSCAN3	ENST00000252211	1	7	1	0
ZNF764	ENST00000252797	1	7	0	0
ZNF557	ENST00000252840	1	10	0	0
ZNF337	ENST00000252979	1	19	0	0
ZNF426	ENST00000253115	1	12	0	0
ZNF132	ENST00000254166	1	18	0	0
ZNF24	ENST00000261332	0	4	1	0
ZNF175	ENST00000262259	1	16	0	0
ZNF225	ENST00000262894	1	20	0	0
ZSCAN25	ENST00000262941	0	7	1	0
ZNF264	ENST00000263095	1	13	0	0
ZNF174	ENST00000268655	0	3	1	0
ZIM3	ENST00000269834	1	11	0	0
ZNF45	ENST00000269973	1	17	0	0
ZFP14	ENST00000270001	1	13	0	0
ZNF614	ENST00000270649	1	12	0	0
ZNF214	ENST00000278314	2	11	0	0
ZNF215	ENST00000278319	1	5	1	0
ZNF343	ENST00000278772	1	12	0	0
ZNF547	ENST00000282282	1	9	0	0
ZNF773	ENST00000282292	1	9	0	0
ZNF551	ENST00000282296	1	16	0	0
ZNF256	ENST00000282308	1	15	0	0
ZSCAN1	ENST00000282326	0	3	1	0
ZNF689	ENST00000287461	1	12	0	0
ZNF19	ENST00000288177	1	9	0	0
ZSCAN23	ENST00000289788	0	5	1	0
ZNF235	ENST00000291182	1	16	0	0
ZNF667	ENST00000292069	1	16	0	0
ZSCAN21	ENST00000292450	0	7	1	0
ZNF251	ENST00000292562	1	13	0	0
ZNF250	ENST00000292579	1	13	0	0
ZNF585A	ENST00000292841	1	23	0	0
ZNF382	ENST00000292928	1	10	0	0
ZNF613	ENST00000293471	1	13	0	0
ZNF496	ENST00000294753	1	5	1	0
ZNF514	ENST00000295208	1	7	0	0
PRDM9	ENST00000296682	1	3	0	0
ZNF211	ENST00000299871	1	13	0	0
ZNF91	ENST00000300619	1	7	0	0
ZNF582	ENST00000301310	1	10	0	0
ZFP28	ENST00000301318	2	15	0	0
ZNF577	ENST00000301399	1	8	0	0
ZNF560	ENST00000301480	2	17	0	0
ZNF597	ENST00000301744	1	8	0	0
ZNF25	ENST00000302609	1	13	0	0
ZNF561	ENST00000302851	1	9	0	0
ZNF439	ENST00000304030	1	11	0	0
ZNF420	ENST00000304239	1	2	0	0
ZNF33A	ENST00000307441	1	17	0	0
ZNF17	ENST00000307658	1	17	0	0
ZNF471	ENST00000308031	1	16	0	0
ZNF483	ENST00000309235	1	14	1	0
ZNF624	ENST00000311331	1	21	0	0
ZNF490	ENST00000311437	1	13	0	0
ZNF135	ENST00000313434	1	16	0	0
ZNF436	ENST00000314011	1	12	0	0
ZNF620	ENST00000314529	1	8	0	0
ZNF354C	ENST00000315475	1	11	0	0
ZNF776	ENST00000317178	1	10	0	0
ZNF554	ENST00000317243	1	9	0	0
ZNF671	ENST00000317398	1	12	0	0
ZSCAN4	ENST00000318203	0	4	1	0
ZNF454	ENST00000320129	1	12	0	0
ZNF543	ENST00000321545	1	13	0	0
ZNF354B	ENST00000322434	1	13	0	0
ZKSCAN1	ENST00000324306	1	6	1	0
ZNF875	ENST00000324411	1	14	0	0
PEG3	ENST00000326441	0	13	1	0
ZKSCAN5	ENST00000326775	1	13	1	0
ZKSCAN2	ENST00000328086	1	6	1	0
ZNF662	ENST00000328199	1	8	0	0
ZNF571	ENST00000328550	1	16	0	0
ZNF26	ENST00000328654	1	13	0	0
ZNF599	ENST00000329285	1	14	0	0
ZSCAN22	ENST00000329665	0	8	1	0
ZNF722P	ENST00000330020	1	7	0	0
ZKSCAN8	ENST00000330236	1	9	1	0
ZNF397	ENST00000330501	0	9	1	0
ZNF470	ENST00000330619	1	17	0	0
ZNF479	ENST00000331162	1	12	0	0
ZNF789	ENST00000331410	1	9	0	0
ZNF534	ENST00000332323	1	16	0	0
ZNF530	ENST00000332854	1	15	0	0
ZSCAN30	ENST00000333206	0	7	1	0
ZNF568	ENST00000333987	1	15	0	0
ZNF749	ENST00000334181	1	20	0	0
ZNF480	ENST00000334564	1	12	0	0
ZNF486	ENST00000335117	1	10	0	0
ZNF354A	ENST00000335815	1	13	0	0
ZNF548	ENST00000336128	1	11	0	0
ZNF224	ENST00000336976	1	18	0	0
ZNF444	ENST00000337080	0	4	1	0
ZNF394	ENST00000337673	1	7	1	0
ZNF420	ENST00000337995	1	10	0	0
ZNF587	ENST00000339656	1	14	0	0
ZNF189	ENST00000339664	1	16	0	0
ZSCAN16	ENST00000340487	0	4	1	0
ZNF606	ENST00000341164	1	15	0	0
ZNF772	ENST00000343280	1	10	0	0
ZNF195	ENST00000343338	1	14	0	0
ZNF669	ENST00000343381	1	7	0	0
ZNF197	ENST00000344387	1	22	1	0
ZNF546	ENST00000347077	1	22	0	0
ZNF419	ENST00000347466	1	11	0	0
ZNF37A	ENST00000351773	2	4	0	0
RBAK	ENST00000353796	1	18	0	0
ZNF589	ENST00000354698	1	6	0	0
ZNF649	ENST00000354957	1	11	0	0
ZNF565	ENST00000355114	1	12	0	0
ZNF140	ENST00000355557	1	11	0	0
ZNF772	ENST00000356584	1	10	0	0
ZNF790	ENST00000356725	1	13	0	0
ZNF816	ENST00000357666	1	15	0	0
ZNF98	ENST00000357774	1	7	0	0
ZNF429	ENST00000358491	1	8	0	0
ZNF707	ENST00000358656	1	7	0	0
ZNF808	ENST00000359798	2	5	0	0
ZNF517	ENST00000359971	1	10	0	0
ZNF135	ENST00000359978	1	6	0	0
ZNF860	ENST00000360311	1	5	0	0
ZNF460	ENST00000360338	1	11	0	0
ZNF317	ENST00000360385	1	14	0	0
ZNF528	ENST00000360465	1	15	0	0
ZSCAN12	ENST00000361028	0	11	1	0
ZSCAN20	ENST00000361328	0	10	1	0
ZFP69	ENST00000372706	2	9	1	0
ZNF485	ENST00000374435	1	11	0	0
ZNF549	ENST00000376233	1	15	0	0
ZFP57	ENST00000376881	1	7	0	0
ZKSCAN4	ENST00000377294	1	7	1	0
ZNF165	ENST00000377325	0	6	1	0
ZNF425	ENST00000378061	1	19	0	0
ZNF205	ENST00000382192	1	8	0	0
ZNF316	ENST00000382252	1	15	0	0
ZNF841	ENST00000389534	1	22	0	0
ZNF552	ENST00000391701	1	8	0	0
ZSCAN5A	ENST00000391713	0	5	1	0
ZNF320	ENST00000391781	1	12	0	0
ZNF615	ENST00000391795	1	19	0	0
ZNF233	ENST00000391958	1	11	0	0
ZNF222	ENST00000391960	1	11	0	0
ZFP82	ENST00000392161	1	13	0	0
ZNF566	ENST00000392170	1	10	0	0
ZNF493	ENST00000392288	1	21	0	0
ZNF84	ENST00000392319	1	19	0	0
ZNF605	ENST00000392321	1	17	0	0
ZSCAN25	ENST00000394152	1	7	1	0
ZNF785	ENST00000395216	1	7	0	0
ZNF169	ENST00000395395	1	13	0	0
ZNF484	ENST00000395505	1	19	0	0
ZNF287	ENST00000395825	1	14	1	0
ZNF445	ENST00000396077	1	15	1	0
ZNF586	ENST00000396154	1	9	0	0
ZNF813	ENST00000396403	1	14	0	0
ZNF765	ENST00000396408	1	11	0	0
ZNF665	ENST00000396424	1	18	0	0
ZSCAN32	ENST00000396852	1	6	1	0
ZSCAN29	ENST00000396976	0	6	1	0
ZNF99	ENST00000397104	1	30	0	0
ZNF846	ENST00000397902	1	13	0	0
ZNF135	ENST00000401053	1	16	0	0
ZNF10	ENST00000402932	1	10	0	0
ZNF621	ENST00000403205	1	7	0	0
ZNF610	ENST00000403906	1	9	0	0
ZNF792	ENST00000404801	1	13	0	0
ZNF74	ENST00000405993	1	12	0	0
ZNF155	ENST00000407951	1	13	0	0
ZFP69B	ENST00000411995	1	10	1	0
ZNF200	ENST00000414144	1	5	0	0
ZNF805	ENST00000414468	1	13	0	0
ZNF716	ENST00000420713	1	10	0	0
ZNF286A	ENST00000421016	1	10	0	0
ZNF679	ENST00000421025	1	8	0	0
ZNF578	ENST00000421239	1	12	0	0
ZSCAN26	ENST00000421553	0	9	1	0
ZNF880	ENST00000422689	1	13	0	0
ZNF3	ENST00000424697	1	9	0	0
ZNF419	ENST00000424930	1	11	0	0
ZSCAN9	ENST00000425468	0	5	1	0
ZNF418	ENST00000425570	1	17	0	0
ZKSCAN7	ENST00000426540	1	13	1	0
ZNF10	ENST00000426665	1	12	0	0
ZNF234	ENST00000426739	1	19	0	0
ZNF230	ENST00000429154	1	10	0	0
ZNF735	ENST00000429565	1	8	0	0
ZNF713	ENST00000429591	1	7	0	0
ZNF69	ENST00000429654	1	14	0	0
ZNF761	ENST00000432094	1	19	0	0
ZNF619	ENST00000432264	1	10	0	0
ZNF778	ENST00000433976	1	19	0	0
ZNF783	ENST00000434415	1	4	0	1
ZNF814	ENST00000435989	1	24	0	0
ZNF527	ENST00000436120	1	11	0	0
ZNF852	ENST00000436261	1	12	0	0
ZSCAN31	ENST00000439158	0	6	1	0
ZNF678	ENST00000440339	2	4	0	0
ZNF304	ENST00000443917	1	17	0	0
ZNF879	ENST00000444149	1	13	0	0
ZNF300	ENST00000446148	1	12	0	0
ZNF619	ENST00000447116	1	10	0	0
ZNF569	ENST00000448051	1	18	0	0
ZSCAN2	ENST00000448803	0	14	1	0
ZNF347	ENST00000452676	1	20	0	0
ZNF562	ENST00000453372	1	10	0	0
ZNF433	ENST00000455504	1	2	0	0
ZNF780A	ENST00000455521	1	17	0	0
ZNF714	ENST00000456283	1	13	0	0
ZNF550	ENST00000457177	1	8	0	0
ZNF28	ENST00000457749	1	18	0	0
ZNF746	ENST00000458143	1	4	0	1
ZNF496	ENST00000461277	1	5	0	0
ZNF785	ENST00000470110	1	7	0	0
ZNF525	ENST00000474037	1	10	0	0
ZNF398	ENST00000475153	1	9	0	1
ZNF273	ENST00000476120	1	13	0	0
ZNF782	ENST00000481138	1	15	0	0
ZFP57	ENST00000488757	1	7	0	0
ZNF786	ENST00000491431	1	15	0	0
ZNF154	ENST00000512439	1	10	0	0
ZNF829	ENST00000520965	1	10	0	0
ZNF195	ENST00000526601	1	8	0	0
ZSCAN9	ENST00000527844	0	3	1	0
ZNF202	ENST00000530393	1	8	1	0
ZSCAN5C	ENST00000534327	0	5	1	0
ZNF34	ENST00000534337	1	4	0	0
ZNF324	ENST00000536459	1	9	0	0
ZNF559-ZNF177	ENST00000541595	1	7	0	0
ZSCAN21	ENST00000543588	0	7	1	0
ZNF641	ENST00000544117	1	5	0	0
ZNF324B	ENST00000545523	1	9	0	0
ZFP37	ENST00000553380	2	12	0	0
ZSCAN29	ENST00000568898	0	6	1	0
AC002310.4	ENST00000569360	1	4	0	0
ZFP90	ENST00000570495	1	13	0	0
ZNF205	ENST00000570935	1	2	0	0
ZNF213	ENST00000574902	2	5	1	0
ZNF232	ENST00000575898	0	5	1	0
ZSCAN10	ENST00000576985	0	14	1	0
ZNF18	ENST00000577671	1	2	0	0
ZNF18	ENST00000580306	1	5	1	0
ZNF570	ENST00000586475	1	11	0	0
ZSCAN5B	ENST00000586855	0	5	1	0
ZNF404	ENST00000587539	1	15	0	0
ZNF559	ENST00000587557	1	16	0	0
ZNF221	ENST00000587682	1	15	0	0
ZNF177	ENST00000589262	1	10	0	0
ZNF396	ENST00000589332	0	3	1	0
ZNF573	ENST00000590414	1	19	0	0
AC008770.2	ENST00000590798	1	9	0	0
ZNF529	ENST00000591340	1	11	0	0
AC067968.1	ENST00000591793	2	12	0	0
ZNF699	ENST00000591998	1	16	0	0
ZNF266	ENST00000592904	1	14	0	0
ZNF766	ENST00000593612	1	10	0	0
ZIM2	ENST00000593711	2	5	0	0
ZNF446	ENST00000594369	1	3	1	0
ZNF587B	ENST00000594901	1	15	0	0
ZNF845	ENST00000595091	1	27	0	0
ZNF468	ENST00000595646	1	11	0	0
ZNF480	ENST00000595962	1	12	0	0
ZNF446	ENST00000596341	1	3	1	0
ZNF544	ENST00000596652	1	13	0	0
ZNF836	ENST00000597252	1	24	0	0
ZIK1	ENST00000597850	1	9	0	0
ZNF682	ENST00000597972	1	13	0	0
ZNF615	ENST00000598071	1	19	0	0
ZNF431	ENST00000598331	1	3	0	0
ZNF677	ENST00000598513	2	24	0	0
ZNF71	ENST00000599599	1	13	0	0
ZSCAN18	ENST00000600404	0	2	1	0
ZNF649	ENST00000600738	1	10	0	0
PEG3	ENST00000600833	0	2	1	0
ZNF610	ENST00000601151	1	9	0	0
ZNF558	ENST00000601372	1	9	0	0
ZNF705A	ENST00000610508	1	6	0	0
ZNF772	ENST00000610548	1	8	0	0
ZNF282	ENST00000610704	1	5	0	1
ZNF2	ENST00000611147	1	9	0	0
ZNF74	ENST00000611540	1	12	0	0
ZNF2	ENST00000614034	1	9	0	0
ZNF229	ENST00000614049	1	18	0	0
ZNF814	ENST00000614383	1	11	0	0
ZNF274	ENST00000617501	2	6	1	0
ZNF780B	ENST00000617676	1	23	0	0
ZNF568	ENST00000617745	2	11	0	0
ZNF778	ENST00000620195	1	19	0	0
ZNF195	ENST00000620374	1	8	0	0
ZNF479	ENST00000620639	1	8	0	0
ZNF227	ENST00000621083	1	19	0	0
ZNF658	ENST00000621410	1	4	0	0
ZNF8	ENST00000621650	1	8	0	0
ZNF2	ENST00000622059	1	9	0	0
ZNF700	ENST00000622593	1	20	0	0
ZNF793	ENST00000627814	1	7	0	0
ZNF888	ENST00000638862	1	18	0	0
ZNF132	ENST00000639285	1	8	0	0
ZNF577	ENST00000639636	1	8	0	0
ZNF746	ENST00000644635	1	4	0	1
ZNF23	ENST00000647773	1	16	0	0
ZNF331	ENST00000648236	1	12	0	0
ZNF684	ENST00000648542	1	8	0	0
ZNF600	ENST00000648973	1	20	0	0
ZNF852	ENST00000650400	1	5	0	0
ZNF891	ENST00000650709	1	8	0	0
ZNF717	ENST00000652011	1	9	0	0
ZNF611	ENST00000652185	1	17	0	0
ZNF75A	ENST00000669516	1	5	1	0
ZNF263	NM_001205513.2	1	9	1	0
ZNF641	XM_002687345.6	1	5	0	0
ZSCAN29	XM_005695293.3	0	6	1	0
ZNF23	XM_010814706.3	1	16	0	0
LOC508131	XM_010815380.3	1	2	0	0
ZKSCAN8	XM_018038550.1	1	9	1	0
ZNF263	XM_018040115.1	0	9	1	0
LOC102178413	XM_018040116.1	2	5	1	0
LOC102178413	XM_018040117.1	1	5	1	0
LOC102176221	XM_018043837.1	1	13	0	0
LOC102170775	XM_018062978.1	1	24	0	0
LOC102188030	XM_018062983.1	1	22	0	0
LOC102175116	XM_018062996.1	1	14	0	0
LOC108638084	XM_018063209.1	1	7	0	0
LOC515089	XM_024979281.1	1	25	0	0
ZNF655	XM_024984715.1	1	8	0	0
LOC101102169	XM_027977414.2	1	24	0	0
LOC114117957	XM_042231105.1	1	3	0	0
LOC114118024	XM_042231107.1	1	1	0	0
LOC105601991	XM_042231231.1	1	6	0	0
ZSCAN29	XM_042235347.1	0	6	1	0
ZNF263	XM_042240143.1	1	9	1	0
