# Supplementary material
Source: HighWire-hosted journal article supplement (doi:10.1101/gr.281289.125)
Supplement: Supplemental_Table_S12.xlsx [file Supplemental_Table_S12.xlsx]

## Sheet: Table S12
Table S12: Profile information for 25 experimentally unvalidated KZFP TFBS retrieved from the JASPAR 2024 database.
Matrix ID	Name	Taxon	Species	Data Type	Source/PubmedID
UN0152.1	ZFP28	Vertebrates	Homo sapiens	ChIP-seq	30462313
UN0152.2	ZFP28	Vertebrates	Homo sapiens	ChIP-seq	30462313
UN0156.1	ZFP69	Vertebrates	Homo sapiens	ChIP-seq	30462313
UN0156.2	ZFP69	Vertebrates	Homo sapiens	ChIP-seq	30462313
UN0158.1	ZNF10	Vertebrates	Homo sapiens	ChIP-seq	30462313
UN0204.1	ZNF565	Vertebrates	Homo sapiens	ChIP-seq	30462313
UN0208.1	ZNF597	Vertebrates	Homo sapiens	HT-SELEX	28473536
UN0208.2	ZNF597	Vertebrates	Homo sapiens	HT-SELEX	28473536
UN0245.1	ZSCAN20	Vertebrates	Homo sapiens	ChIP-seq	30462313
UN0245.2	ZSCAN20	Vertebrates	Homo sapiens	ChIP-seq	30462313
UN0597.1	ZNF182	Vertebrates	Homo sapiens	ChIP-exo	28273063
UN0618.1	ZNF483	Vertebrates	Homo sapiens	ChIP-exo	28273063
UN0618.2	ZNF483	Vertebrates	Homo sapiens	ChIP-exo	28273063
UN0619.1	ZNF484	Vertebrates	Homo sapiens	ChIP-seq/ChIP-exo	ReMap
UN0630.1	ZNF554	Vertebrates	Homo sapiens	ChIP-seq/ChIP-exo	ReMap
UN0630.2	ZNF554	Vertebrates	Homo sapiens	ChIP-seq/ChIP-exo	ReMap
UN0650.1	ZNF7	Vertebrates	Homo sapiens	ChIP-seq/ChIP-exo	ReMap
UN0650.2	ZNF7	Vertebrates	Homo sapiens	ChIP-seq/ChIP-exo	ReMap
UN0658.1	ZNF783	Vertebrates	Homo sapiens	ChIP-seq/ChIP-exo	ReMap
UN0658.2	ZNF783	Vertebrates	Homo sapiens	ChIP-seq/ChIP-exo	ReMap
UN0659.1	ZNF786	Vertebrates	Homo sapiens	ChIP-seq/ChIP-exo	ReMap
UN0659.2	ZNF786	Vertebrates	Homo sapiens	ChIP-seq/ChIP-exo	ReMap
UN0660.1	ZNF789	Vertebrates	Homo sapiens	ChIP-seq/ChIP-exo	ReMap
UN0660.2	ZNF789	Vertebrates	Homo sapiens	ChIP-seq/ChIP-exo	ReMap
UN0813.1	ZNF394	Vertebrates	Homo sapiens	ChIP-seq	GTRD
